# Supplementary material
Source: HighWire-hosted journal article supplement (doi:10.1101/rna.079903.123)
Supplement: Supplemental_Table_S3-5.pdf [file Supplemental_Table_S3-5.pdf]

**Table S3. Yeast strains.**

| Strain ID | Background | Genotype                                                                      | Source/Reference |
|-----------|------------|-------------------------------------------------------------------------------|------------------|
| YAM1      | BY4741     | <i>MATa his3Δ1 leu2Δ0 met15Δ0 ura3Δ0</i>                                      | Euroscarf        |
| YAM6      | BY4741     | <i>MATa his3Δ1 leu2Δ0 met15Δ0 ura3Δ0 xrn1Δ::kanMX4</i>                        | Euroscarf        |
| YAM202    | BY4741     | <i>MATa his3Δ1 leu2Δ0 met15Δ0 ura3Δ0 upf1Δ::kanMX4</i>                        | Euroscarf        |
| YAM2831   | YAM1       | <i>MATa his3Δ1 leu2Δ0 met15Δ0 ura3Δ0 adh2Δ::URA3</i>                          | This work        |
| YAM2852   | YAM2831    | <i>MATa his3Δ1 leu2Δ0 met15Δ0 ura3Δ0 xut0741-a</i>                            | This work        |
| YAM2853   | YAM2831    | <i>MATa his3Δ1 leu2Δ0 met15Δ0 ura3Δ0 xut0741-b</i>                            | This work        |
| YAM2854   | YAM2831    | <i>MATa his3Δ1 leu2Δ0 met15Δ0 ura3Δ0 xut0741-d</i>                            | This work        |
| YAM2855   | YAM2831    | <i>MATa his3Δ1 leu2Δ0 met15Δ0 ura3Δ0 xut0741-f</i>                            | This work        |
| YAM2862   | YAM2852    | <i>MATa his3Δ1 leu2Δ0 met15Δ0 ura3Δ0 xut0741-a<br/>upf1Δ::kanMX4</i>          | This work        |
| YAM2863   | YAM2853    | <i>MATa his3Δ1 leu2Δ0 met15Δ0 ura3Δ0 xut0741-b<br/>upf1Δ::kanMX4</i>          | This work        |
| YAM2864   | YAM2854    | <i>MATa his3Δ1 leu2Δ0 met15Δ0 ura3Δ0 xut0741-d<br/>upf1Δ::kanMX4</i>          | This work        |
| YAM2865   | YAM2855    | <i>MATa his3Δ1 leu2Δ0 met15Δ0 ura3Δ0 xut0741-f<br/>upf1Δ::kanMX4</i>          | This work        |
| YAM2893   | YAM2831    | <i>MATa his3Δ1 leu2Δ0 met15Δ0 ura3Δ0 xut0741-e</i>                            | This work        |
| YAM2896   | YAM2893    | <i>MATa his3Δ1 leu2Δ0 met15Δ0 ura3Δ0 xut0741-e<br/>upf1Δ::kanMX4</i>          | This work        |
| YAM2898   | YAM2831    | <i>MATa his3Δ1 leu2Δ0 met15Δ0 ura3Δ0 xut0741-c</i>                            | This work        |
| YAM2901   | YAM2898    | <i>MATa his3Δ1 leu2Δ0 met15Δ0 ura3Δ0 xut0741-c<br/>upf1Δ::kanMX4</i>          | This work        |
| YAM2903   | YAM2831    | <i>MATa his3Δ1 leu2Δ0 met15Δ0 ura3Δ0 xut0741-chimera</i>                      | This work        |
| YAM2904   | YAM2903    | <i>MATa his3Δ1 leu2Δ0 met15Δ0 ura3Δ0 xut0741-chimera<br/>upf1Δ::kanMX4</i>    | This work        |
| YAM2908   | YAM2831    | <i>MATa his3Δ1 leu2Δ0 met15Δ0 ura3Δ0 xut0741-b-3FLAG</i>                      | This work        |
| YAM2911   | YAM2908    | <i>MATa his3Δ1 leu2Δ0 met15Δ0 ura3Δ0 xut0741-b-3FLAG<br/>upf1Δ::kanMX4</i>    | This work        |
| YAM2934   | YAM2831    | <i>MATa his3Δ1 leu2Δ0 met15Δ0 ura3Δ0 SL-xut0741-b-3FLAG</i>                   | This work        |
| YAM2937   | YAM2934    | <i>MATa his3Δ1 leu2Δ0 met15Δ0 ura3Δ0 SL-xut0741-b-3FLAG<br/>upf1Δ::kanMX4</i> | This work        |
| YAM2951   | YAM2908    | <i>MATa his3Δ1 leu2Δ0 met15Δ0 ura3Δ0 xut0741-b-3FLAG<br/>xrn1Δ::kanMX4</i>    | This work        |
| YAM2952   | YAM2934    | <i>MATa his3Δ1 leu2Δ0 met15Δ0 ura3Δ0 SL-xut0741-b-3FLAG<br/>xrn1Δ::kanMX4</i> | This work        |

**Table S4. Oligonucleotides.**

| ID       | Sequence 5'-3'                                                                     | Target                 | Use                       |
|----------|------------------------------------------------------------------------------------|------------------------|---------------------------|
| AMO34    | CTTCTTCCGTAATTATAATCGGG                                                            | <i>XRN1</i>            | PCR                       |
| AMO35    | GGTGTCCACAGATCAAATGGC                                                              | <i>XRN1</i>            | PCR                       |
| AMO190   | GGCGAACTCCGTAATTCGCC                                                               | <i>UPF1</i>            | PCR                       |
| AMO193   | GGCTGTAATGGCTTTCTGG                                                                | <i>scR1</i>            | qPCR                      |
| AMO415   | GTGCGGAATAGAGAACTATCC                                                              | <i>scR1</i>            | RT + qPCR                 |
| AMO496   | TCTTGCCAGTAAAAGCTCTCATG                                                            | ITS1 & 20S pre-rRNA    | Northern blot             |
| AMO1482  | ATCCCGGCCGCTCCATCAC                                                                | <i>scR1</i>            | Northern blot             |
| AMO1595  | GGGAAAAGTTTGGTTGGCTATTCTGGTGGTTAG                                                  | <i>XUT1678/SUT768</i>  | Northern blot             |
| AMO1669  | GGAAATCAGGGCTCAAGAGCC                                                              | <i>XRN1</i>            | PCR                       |
| AMO1762  | GACAGTGTTCGAAGTTTCACGA                                                             | <i>XUT0741</i>         | RT & Northern blot        |
| AMO2710  | TGGGAGGGACACCTTTATACGC                                                             | <i>UPF1</i>            | PCR                       |
| AMO2711  | CTAGGATATCAAGTCCATGCC                                                              | <i>UPF1</i>            | PCR                       |
| AMO2712  | CTTTATTACGCATTGCAGTGCG                                                             | <i>UPF1</i>            | PCR                       |
| AMO3350  | GAAGTCGTTCTGACTAGCAACATGG                                                          | <i>XUT0741/ADH2</i>    | PCR                       |
| AMO3247  | CGTCAAATAAGTACTTACGACTTCC                                                          | <i>XRN1</i>            | PCR                       |
| AMO3351  | CAGGCGGGAACCATCCACTTAC                                                             | <i>XUT0741/ADH2</i>    | PCR                       |
| AMO3354  | GGCTGGAAGATCGGTGACTA                                                               | <i>XUT0741</i>         | RT                        |
| AMO3359  | CAACTTGAGAGCAGGCCACT                                                               | <i>XUT0741</i>         | Cloning                   |
| AMO3379  | GGGGTACCGCCGGCCGCTATATTTGG                                                         | <i>XUT0741</i>         | Cloning                   |
| AMO3382  | GCTCTAGAGCCGGCATCTCCAATTATAAGTTGG                                                  | <i>XUT0741</i>         | Cloning                   |
| AMO3471  | GGGGTACCAGATCTGAATTCAGGAATGGGTACAAC<br>TCACAGG                                     | <i>XUT0741</i>         | Cloning                   |
| AMO3497  | TACCATTCTGAATTCTAGTTGGTGGTCACGAAG<br>GTGCCGGT                                      | <i>XUT0741</i>         | Cloning                   |
| AMO3530  | CCTTGAATCGATGTCATGATCTTTATAATCACCGTC<br>ATGGTCTTTGTAGTCGGTTCTTTGGCTGTTCAATATG      | <i>XUT0741 + 3FLAG</i> | Cloning                   |
| AMO3531  | TATAAAGATCATGACATCGATTACAAGGATGACGAT<br>GACAAGCTAGGATCCTAGACCACCAGCAGCACCAG<br>AAA | <i>XUT0741 + 3FLAG</i> | Cloning                   |
| AMO3549  | ACTGATCCCGCGGTTCCGCGGGTTTGTGGAGGA<br>TGCCGTA                                       | <i>XUT0741</i>         | Cloning                   |
| AMO3550  | AAACCGCGGCGAACCGCGGGATCAGTCGGTTATAG<br>TTTGTC                                      | <i>XUT0741</i>         | Cloning                   |
| AMO3558  | CGAACACTGCTGAAGCTACC                                                               | <i>XUT0741</i>         | qPCR                      |
| AMO3559  | CTACTTTTGTCTCCACCGC                                                                | <i>XUT0741</i>         | qPCR                      |
| AMO3581  | TAAGGATATCCAGTTCCAAAGCC                                                            | <i>XUT0741</i>         | Northern blot             |
| 5S_44    | /5BiotinTEG/ACT+ACTCGGTTCAGGCTCT+TACCAGC<br>TTAACT+ACAGTT                          | 5S rRNA                | Ribo-Seq (ribo-depletion) |
| 5.8S_125 | /5BiotinTEG/AA+ATGACGCTCA+AACAGGCATGCC<br>CCCTGGA+AT                               | 5.8S rRNA              | Ribo-Seq (ribo-depletion) |
| 18S_1712 | /5BiotinTEG/AA+ATGACCAAGT+TTGTCCAA+ATTC<br>TCCGCTC                                 | 18S rRNA               | Ribo-Seq (ribo-depletion) |

|           |                                                                                           |          |                               |
|-----------|-------------------------------------------------------------------------------------------|----------|-------------------------------|
| 18S_rDNA1 | /5BiotinTEG/TGATGCCCCGACCGTCCTAT+TAAT<br>CATTACGACCA+AGTTTGTCCAA+ATTCTCCGCTCTG<br>AGA     | 18S rRNA | Ribo-Seq (ribo-<br>depletion) |
| 25S_557   | /5BiotinTEG/GACTT+ACGTCGCAGTCCTC+AGTCCC<br>AGCTGGCAGT+ATTCCCACAGGCTA                      | 25S rRNA | Ribo-Seq (ribo-<br>depletion) |
| 25S_698   | /5BiotinTEG/CGAGGCCCA+ACCTACGTTCACT+TT<br>CATT+ACGCGT                                     | 25S rRNA | Ribo-Seq (ribo-<br>depletion) |
| 25S_rDNA2 | /5BiotinTEG/GCTAGCCTGCT+ATGGTTCAGCGACG<br>CCACAAGTATCA+AATGCCCTTCCCTTTCAACAA+T<br>TTCACG  | 25S rRNA | Ribo-Seq (ribo-<br>depletion) |
| 25S_rDNA3 | /5BiotinTEG/TTCCAGCTCCGCTTCATTGAATAAGTA<br>+AAGAAGTAT+TTTGCCGACTCCCTTATCTACATT+<br>ATTCTA | 25S rRNA | Ribo-Seq (ribo-<br>depletion) |
| 25S_rDNA5 | /5BiotinTEG/ATTCTATT+ATTCCATGCTAAT+ATATT<br>CGAGCAAGCGGTTATCAGTACGACCTGGCATGAA+<br>AAC    | 25S rRNA | Ribo-Seq (ribo-<br>depletion) |

Note: + corresponds to a Locked nucleic acid base.

**Table S5. Mapping statistics.**

| Sample      | Data     | Figure | Read pairs in fastq | Read pairs mapped | Read pairs filtered |
|-------------|----------|--------|---------------------|-------------------|---------------------|
| WT-1-DMSO   | RNA-Seq  | 1      | 14 503 671          | 13 972 248        | 10 726 366          |
| WT-2-DMSO   | RNA-Seq  | 1      | 30 921 123          | 29 567 896        | 21 617 872          |
| WT-1-CHX    | RNA-Seq  | 1      | 15 161 829          | 14 660 499        | 12 496 933          |
| WT-2-CHX    | RNA-Seq  | 1      | 17 931 225          | 17 208 697        | 14 344 426          |
| upf1-1-DMSO | RNA-Seq  | 1      | 30 166 640          | 29 037 586        | 22 634 261          |
| upf1-2-DMSO | RNA-Seq  | 1      | 31 948 976          | 30 715 056        | 16 772 544          |
| upf1-1-CHX  | RNA-Seq  | 1      | 35 856 855          | 34 740 967        | 26 361 859          |
| upf1-2-CHX  | RNA-Seq  | 1      | 15 904 538          | 15 590 456        | 9 328 222           |
| WT-1-DMSO   | RNA-Seq  | 1 & S1 | 13 775 833          | 13 509 645        | 7 169 855           |
| WT-2-DMSO   | RNA-Seq  | 1 & S1 | 13 441 382          | 13 140 538        | 9 480 390           |
| WT-1-ANS    | RNA-Seq  | 1 & S1 | 13 421 285          | 13 182 950        | 7 337 498           |
| WT-2-ANS    | RNA-Seq  | 1 & S1 | 13 438 583          | 13 146 920        | 8 715 834           |
| upf1-1-DMSO | RNA-Seq  | 1 & S1 | 13 909 130          | 13 700 767        | 9 731 949           |
| upf1-2-DMSO | RNA-Seq  | 1 & S1 | 14 591 424          | 14 325 138        | 10 950 987          |
| upf1-1-ANS  | RNA-Seq  | 1 & S1 | 13 087 188          | 12 897 985        | 9 889 436           |
| upf1-2-ANS  | RNA-Seq  | 1 & S1 | 14 556 757          | 14 317 925        | 12 329 660          |
| WT-1        | RNA-Seq  | 2 & S2 | 35 688 357          | 31 863 303        | 16 712 627          |
| WT-2        | RNA-Seq  | 2 & S2 | 32 174 963          | 28 880 548        | 15 505 733          |
| WT-1-GD     | RNA-Seq  | 2 & S2 | 29 818 665          | 27 350 132        | 13 730 561          |
| WT-2-GD     | RNA-Seq  | 2 & S2 | 27 553 301          | 25 480 615        | 12 754 661          |
| WT-1-CHX    | RNA-Seq  | 2 & S2 | 33 551 448          | 32 677 828        | 12 458 944          |
| WT-2-CHX    | RNA-Seq  | 2 & S2 | 33 064 352          | 32 234 831        | 12 073 738          |
| WT-2-GD-CHX | RNA-Seq  | 2 & S2 | 30 786 212          | 29 499 680        | 5 495 599           |
| WT-1-GD-CHX | RNA-Seq  | 2 & S2 | 28 524 919          | 27 584 517        | 6 720 423           |
| xrn1-1      | RNA-Seq  | 2 & S2 | 39 462 002          | 35 373 186        | 25 848 284          |
| xrn1-2      | RNA-Seq  | 2 & S2 | 28 933 960          | 26 044 163        | 19 226 873          |
| xrn1-1-GD   | RNA-Seq  | 2 & S2 | 39 798 609          | 36 233 080        | 26 753 494          |
| xrn1-2-GD   | RNA-Seq  | 2 & S2 | 33 148 328          | 29 802 594        | 21 719 642          |
| upf1-1      | RNA-Seq  | 2 & S2 | 34 841 355          | 30 582 692        | 17 908 638          |
| upf1-2      | RNA-Seq  | 2 & S2 | 32 640 573          | 29 703 654        | 16 921 445          |
| upf1-1-GD   | RNA-Seq  | 2 & S2 | 31 998 193          | 28 912 284        | 15 861 157          |
| upf1-2-GD   | RNA-Seq  | 2 & S2 | 35 046 407          | 31 617 414        | 15 877 798          |
| WT-1        | Ribo-Seq | 3 & S3 | 77 424 622          | 72 489 228        | 10 396 011          |
| WT-2        | Ribo-Seq | 3 & S3 | 82 084 394          | 75 850 401        | 9 045 008           |
| upf1-1      | Ribo-Seq | 3 & S3 | 88 048 157          | 81 706 396        | 13 198 391          |
| upf1-2      | Ribo-Seq | 3 & S3 | 78 102 685          | 72 561 775        | 11 883 099          |
| WT-1-CHX    | Ribo-Seq | 3 & S3 | 78 440 785          | 72 655 432        | 14 157 109          |
| WT-2-CHX    | Ribo-Seq | 3 & S3 | 78 718 754          | 73 187 204        | 15 092 093          |
| upf1-1-CHX  | Ribo-Seq | 3 & S3 | 70 990 693          | 66 382 238        | 12 523 870          |
| upf1-2-CHX  | Ribo-Seq | 3 & S3 | 75 224 757          | 69 802 815        | 13 429 514          |
