# Supplementary material
Source: HighWire-hosted journal article supplement (doi:10.1101/rna.079903.123)
Supplement: Supplemental_TableS1.xlsx [file Supplemental_TableS1.xlsx]

## Sheet: Figure 1 & S1
ID	NMD sensitive	upf1/WT log2 FC	upf1/WT adj P	upf1/WT DE	WT-CHX/WT log2 FC	WT-CHX/WT adj P	WT-CHX/WT DE	upf1-CHX/WT log2 FC	upf1-CHX/WT adj P	upf1-CHX/WT DE	WT-ANS/WT log2 FC	WT-ANS/WT adj P	WT-ANS/WT DE	upf1-ANS/WT log2 FC	upf1-ANS/WT adj P	upf1-ANS/WT DE
XUT0001	TRUE	2.16601	0.00113403	up	0.860471	0.229112	unchanged	2.52244	8.20713e-05	up	2.85322	0.00131634	up	3.13014	0.000271746	up
XUT0002	TRUE	1.91477	1.08114e-13	up	2.23836	2.84478e-18	up	3.02324	2.13476e-33	up	2.32907	1.5298e-14	up	2.36687	1.83985e-15	up
XUT0003	TRUE	2.17606	5.83024e-17	up	2.11699	9.16532e-16	up	2.97718	3.10328e-31	up	2.13235	3.19089e-11	up	2.85243	1.85745e-20	up
XUT0004	TRUE	1.41146	0.0136873	up	2.77356	1.35274e-07	up	2.46599	3.73483e-06	up	2.66128	0.000131809	up	3.24567	1.14833e-06	up
XUT0005	TRUE	1.50725	4.67252e-06	up	1.90024	3.90371e-09	up	2.43533	1.14203e-14	up	1.86597	2.70472e-05	up	2.15798	4.7474e-07	up
XUT0006	TRUE	2.59641	0.00624901	up	3.4197	0.000133096	up	3.8866	1.04926e-05	up	2.78586	0.00948538	up	3.19584	0.00201987	up
XUT0007	FALSE	-0.298487	0.766308	unchanged	1.55888	0.0457439	up	1.33787	0.0917409	unchanged	1.21274	0.317572	unchanged	1.20808	0.303684	unchanged
XUT0008	TRUE	1.69467	0.00646464	up	2.51432	1.90216e-05	up	3.25525	1.17041e-08	up	2.7704	0.000331223	up	3.47429	2.56529e-06	up
XUT0009	TRUE	2.21206	0.000214114	up	3.40013	1.4816e-09	up	3.78385	9.79066e-12	up	4.76034	3.58005e-09	up	5.16516	7.85469e-11	up
XUT0010	TRUE	1.31959	0.073558	unchanged	3.03388	3.94687e-06	up	3.39092	1.75795e-07	up	2.48775	0.00451463	up	3.02562	0.000300118	up
XUT0011	FALSE	1.74133	NA	NA	-0.279092	0.935793	unchanged	2.83764	0.345556	unchanged	-0.588405	0.921903	unchanged	0.478978	0.931457	unchanged
XUT0012	FALSE	1.51853	0.0623052	unchanged	2.41089	0.00141418	up	2.57629	0.000596232	up	1.52894	0.168067	unchanged	2.33601	0.0236347	up
XUT0013	TRUE	1.45109	0.00185865	up	2.32233	1.38114e-07	up	2.43297	2.937e-08	up	3.26447	1.32434e-06	up	3.40701	2.49224e-07	up
XUT0014	TRUE	2.44726	6.67515e-30	up	2.41276	4.7454e-28	up	3.07906	1.52535e-46	up	2.58596	3.78947e-19	up	3.40162	3.43521e-34	up
XUT0015	TRUE	2.77755	8.08786e-05	up	2.76851	6.64728e-05	up	3.99758	1.77648e-09	up	2.85543	0.00379181	up	4.05782	1.188e-05	up
XUT0016	TRUE	3.89095	NA	NA	2.52518	0.379028	unchanged	4.50632	0.0778901	unchanged	0	1	unchanged	4.04591	0.259327	unchanged
XUT0017	TRUE	2.88211	5.03062e-30	up	3.09778	1.48601e-33	up	3.83535	9.23755e-53	up	3.05534	2.27782e-19	up	4.32003	2.72351e-40	up
XUT0020	FALSE	0.0844226	0.850688	unchanged	1.95431	1.01737e-08	up	1.57287	6.04386e-06	up	1.49826	0.00193132	up	1.63086	0.000473089	up
XUT0021	TRUE	1.08216	0.325875	unchanged	3.26266	0.000436258	up	2.4691	0.0100245	up	3.82606	0.0106504	up	3.44051	0.0206666	up
XUT0022	TRUE	1.67295	NA	NA	4.11905	0.0408209	up	3.14159	0.132819	unchanged	4.80042	0.0360978	up	5.03632	0.0240624	up
XUT0023	FALSE	1.73046	0.0554124	unchanged	4.45657	1.26956e-08	up	4.37035	2.44782e-08	up	2.21928	0.00617243	up	2.65572	0.00061607	up
XUT0024	TRUE	0.709209	0.551131	unchanged	3.27135	0.00059681	up	2.74868	0.00468482	up	3.998	0.0262103	up	4.94364	0.00424265	up
XUT0025	TRUE	2.09032	0.0150985	up	3.21596	5.78086e-05	up	3.52319	8.36735e-06	up	2.19899	0.0480351	up	3.40479	0.00100083	up
XUT0026	TRUE	2.42923	0.00871267	up	3.46459	6.33946e-05	up	3.72734	1.40127e-05	up	4.75678	0.00539245	up	5.16996	0.00199875	up
XUT0027	FALSE	0.788709	0.292326	unchanged	1.22352	0.0750341	unchanged	1.34172	0.0500218	unchanged	1.83894	0.0452078	up	2.10275	0.0166799	up
XUT0029	FALSE	-0.355464	0.594745	unchanged	1.22978	0.0258104	up	0.535496	0.358942	unchanged	0.517382	0.606666	unchanged	1.10371	0.224708	unchanged
XUT0031	FALSE	1.36406	0.106817	unchanged	2.14601	0.00620462	up	2.49006	0.00125052	up	2.80716	0.0129751	up	3.3207	0.00216089	up
XUT0032	TRUE	1.53811	0.312676	unchanged	2.61844	0.0522087	unchanged	3.38234	0.00995213	up	1.72019	0.37067	unchanged	3.27366	0.0558383	unchanged
XUT0033	TRUE	1.8908	0.000263027	up	2.84399	7.13191e-09	up	2.89953	3.24864e-09	up	2.72177	8.08637e-05	up	2.92652	1.27157e-05	up
XUT0034	FALSE	0.726011	0.371443	unchanged	1.90164	0.0072922	up	2.15957	0.00205826	up	2.05116	0.0182148	up	2.30007	0.00581731	up
XUT0035	TRUE	2.42755	5.32585e-08	up	2.9233	2.49692e-11	up	3.0663	1.83263e-12	up	3.64703	9.95419e-07	up	4.49198	4.70475e-10	up
XUT0037	TRUE	2.6053	3.48984e-09	up	2.6466	2.07383e-09	up	3.13728	4.13712e-13	up	3.08929	8.53849e-09	up	3.56066	8.03356e-12	up
XUT0038	FALSE	0.314244	0.456951	unchanged	2.37827	7.94018e-12	up	2.17075	5.88562e-10	up	2.84323	7.8947e-09	up	2.75003	1.48854e-08	up
XUT0039	FALSE	0.693361	0.203128	unchanged	2.21602	3.66772e-06	up	1.63454	0.000926657	up	2.29596	0.000789169	up	2.53435	0.000126787	up
XUT0040	TRUE	1.34274	0.108895	unchanged	2.98144	6.52105e-05	up	2.94921	8.04058e-05	up	3.85052	0.00641488	up	3.99701	0.00382268	up
XUT0041	TRUE	1.81567	0.0589186	unchanged	2.21573	0.0152805	up	2.68556	0.00265119	up	3.05249	0.0137383	up	3.85363	0.00108692	up
XUT0042	TRUE	3.29063	0.00430272	up	3.94761	0.000302871	up	4.75444	8.70752e-06	up	5.04786	0.00277719	up	5.07485	0.00230373	up
XUT0043	TRUE	1.20159	0.113253	unchanged	3.31513	5.30463e-07	up	2.88841	1.6945e-05	up	3.26003	0.000495438	up	3.5191	0.000113447	up
XUT0044	FALSE	0.562491	0.40032	unchanged	2.11131	0.000219663	up	1.54999	0.00853793	up	1.9648	0.0423373	up	1.75626	0.0646376	unchanged
XUT0045	TRUE	1.06534	0.00509068	up	2.24042	2.30999e-10	up	2.05214	8.53005e-09	up	2.14555	1.21076e-05	up	2.39201	4.38003e-07	up
XUT0046	TRUE	1.79194	0.00242025	up	2.80922	4.17361e-07	up	3.29171	1.54182e-09	up	1.988	0.00440954	up	2.31134	0.000564334	up
XUT0047	TRUE	3.04324	4.32853e-53	up	2.61232	2.3035e-38	up	3.47906	4.58552e-69	up	2.44069	8.65547e-30	up	3.30013	1.03286e-55	up
XUT0048	FALSE	0.634255	0.354354	unchanged	2.07271	0.000451129	up	1.82273	0.00234916	up	1.59123	0.0330304	up	1.73591	0.0155637	up
XUT0049	FALSE	1.29289	0.087503	unchanged	1.48909	0.0404793	up	2.28984	0.00100507	up	1.54102	0.0937471	unchanged	2.41015	0.0045073	up
XUT0050	TRUE	2.17586	1.88361e-09	up	2.91028	2.00886e-16	up	3.35799	6.48015e-22	up	3.23555	2.38333e-13	up	2.87026	6.85894e-11	up
XUT0051	TRUE	2.25917	1.60371e-20	up	2.88189	1.46672e-32	up	2.99235	2.04849e-35	up	2.95618	3.93653e-24	up	2.82592	1.37193e-22	up
XUT0052	FALSE	1.26544	0.120241	unchanged	3.68635	1.32306e-07	up	3.63581	2.01279e-07	up	2.78201	0.00462792	up	2.63076	0.00652288	up
XUT0053	FALSE	0.571073	0.396277	unchanged	1.60627	0.00649014	up	2.03006	0.000452694	up	2.61104	0.00237181	up	2.789	0.000805467	up
XUT0054	FALSE	0.848238	0.198326	unchanged	2.67762	2.67379e-06	up	2.92636	2.20405e-07	up	2.89428	0.000106968	up	3.2524	6.87675e-06	up
XUT0055	FALSE	1.11612	0.0753808	unchanged	3.33014	1.11152e-09	up	3.30212	1.5315e-09	up	2.16303	0.0237207	up	2.84084	0.00175276	up
XUT0056	TRUE	2.73282	0.000234583	up	3.45489	1.13516e-06	up	3.95223	1.51478e-08	up	4.76995	0.000100584	up	5.22043	1.42768e-05	up
XUT0057	TRUE	2.56538	5.71314e-37	up	2.40181	1.36884e-31	up	3.2741	1.22511e-59	up	2.62691	2.10322e-27	up	3.212	5.53507e-42	up
XUT0058	TRUE	1.1924	0.471881	unchanged	2.1679	0.134423	unchanged	2.29275	0.112575	unchanged	2.9227	0.0919249	unchanged	2.04438	0.245225	unchanged
XUT0059	FALSE	0.861329	0.469524	unchanged	3.59413	0.000155767	up	3.88525	3.72472e-05	up	4.73902	0.000357948	up	4.54815	0.000550643	up
XUT0060	TRUE	2.31431	2.96298e-24	up	2.8532	8.29106e-36	up	3.27867	5.01446e-48	up	2.20752	2.90274e-12	up	2.93883	4.11963e-22	up
XUT0061	FALSE	0.79599	0.395811	unchanged	2.09917	0.00965728	up	1.83656	0.0259147	up	1.22581	0.316974	unchanged	1.25373	0.287902	unchanged
XUT0062	FALSE	0.125625	0.860712	unchanged	2.11449	8.66576e-05	up	1.63193	0.0031633	up	2.61939	0.00265187	up	2.62585	0.00204349	up
XUT0063	TRUE	0.906755	0.136085	unchanged	2.86172	6.11315e-08	up	2.70112	3.79105e-07	up	2.86771	6.83572e-05	up	3.35548	1.36575e-06	up
XUT0064	FALSE	-0.082511	0.948543	unchanged	1.59338	0.0768854	unchanged	2.03764	0.0210407	up	6.18017	0.00075886	up	6.17739	0.000657693	up
XUT0065	TRUE	3.02099	0.0043326	up	5.74582	1.98915e-09	up	5.74614	1.7975e-09	up	5.09688	2.86314e-05	up	5.79267	1.26046e-06	up
XUT0066	TRUE	3.18064	1.31269e-10	up	3.49269	1.11772e-12	up	4.14692	6.22832e-18	up	3.50313	7.5872e-10	up	4.05583	2.23769e-13	up
XUT0067	TRUE	2.15252	0.0106491	up	3.33322	2.08703e-05	up	3.53547	5.49217e-06	up	2.73349	0.0134086	up	3.78482	0.000268392	up
XUT0068	TRUE	2.10814	0.0079844	up	3.6057	8.1691e-07	up	3.43719	2.90077e-06	up	4.12452	0.0023159	up	4.1604	0.0017694	up
XUT0069	TRUE	1.74666	0.000811186	up	4.10455	2.1902e-18	up	4.22396	1.42655e-19	up	5.4482	2.52194e-12	up	5.66823	2.01509e-13	up
XUT0070	FALSE	0.862486	0.091154	unchanged	1.80848	0.000118998	up	1.77807	0.000160152	up	1.99195	0.00209255	up	2.03947	0.0012	up
XUT0071	FALSE	-0.354101	0.422647	unchanged	1.74946	1.40183e-06	up	1.23595	0.000920848	up	1.77453	0.000465272	up	1.71033	0.000567825	up
XUT0072	FALSE	1.52657	0.00451412	up	2.6002	2.30641e-07	up	2.45767	1.18037e-06	up	2.52601	0.000542236	up	2.76776	9.15135e-05	up
XUT0073	TRUE	0.806909	0.410832	unchanged	2.07971	0.0143144	up	2.46042	0.00324357	up	3.28421	0.00629037	up	2.97412	0.0124313	up
XUT0075	TRUE	0.972018	0.0486917	unchanged	1.53377	0.00100547	up	1.82715	7.00813e-05	up	1.04312	0.1183	unchanged	1.27802	0.0437329	up
XUT0076	TRUE	0.814148	0.271972	unchanged	2.53582	6.75196e-05	up	2.92613	2.9866e-06	up	3.23394	0.000438529	up	3.12096	0.000571012	up
XUT0078	TRUE	2.47481	0.000935842	up	2.81419	0.000103922	up	3.70893	1.16739e-07	up	3.51358	0.00250297	up	4.74617	1.77546e-05	up
XUT0079	FALSE	0.745598	0.428176	unchanged	1.45809	0.0812686	unchanged	1.69071	0.0414565	up	2.40444	0.051809	unchanged	2.5936	0.030012	up
XUT0080	TRUE	1.81795	0.222311	unchanged	3.46135	0.00823518	up	2.87285	0.0322968	up	1.57824	0.344836	unchanged	0.210802	0.908134	unchanged
XUT0081	TRUE	2.54177	9.71885e-17	up	2.23	1.05584e-12	up	3.12913	4.92905e-25	up	2.61787	1.6405e-11	up	3.22714	5.76329e-18	up
XUT0082	TRUE	2.44714	0.00427569	up	2.86605	0.000490017	up	3.49678	1.31096e-05	up	1.9169	0.118501	unchanged	2.61304	0.0232518	up
XUT0083	TRUE	2.60494	1.24398e-50	up	2.01143	7.38478e-30	up	2.7749	4.62987e-57	up	2.20765	3.8306e-28	up	2.89161	8.29627e-50	up
XUT0085	FALSE	0.606413	0.505999	unchanged	1.91711	0.013565	up	1.88439	0.0157245	up	1.79827	0.141003	unchanged	1.94752	0.0973451	unchanged
XUT0086	TRUE	2.86036	1.42258e-19	up	2.39546	2.45197e-13	up	3.68082	3.95906e-32	up	2.52259	1.49341e-07	up	3.57609	3.70471e-15	up
XUT0087	TRUE	2.10729	6.66875e-06	up	2.43548	1.16582e-07	up	2.72361	1.87651e-09	up	2.7215	2.17044e-05	up	3.15201	3.32665e-07	up
XUT0088	TRUE	2.01909	2.43506e-05	up	2.06539	1.387e-05	up	2.74827	2.26311e-09	up	1.63024	0.0163924	up	3.03056	8.0924e-07	up
XUT0089	TRUE	1.9521	0.00629895	up	2.53326	0.000205783	up	3.17793	1.68904e-06	up	3.36887	0.00130679	up	3.81056	0.000171684	up
XUT0092	FALSE	-0.682582	0.314925	unchanged	1.46663	0.00918509	up	0.893773	0.126135	unchanged	1.79987	0.0329651	up	1.24398	0.141805	unchanged
XUT0093	FALSE	0.183261	0.826163	unchanged	1.61333	0.0133127	up	1.12612	0.0939408	unchanged	2.18095	0.00926235	up	1.3865	0.103334	unchanged
XUT0094	TRUE	2.35522	0.00173562	up	3.00416	2.81806e-05	up	3.34664	2.24803e-06	up	2.03202	0.0474565	up	3.14557	0.000876781	up
XUT0095	TRUE	3.04653	0.000949721	up	2.8527	0.00167569	up	4.0982	2.32492e-06	up	3.27504	0.0068568	up	3.95713	0.000659335	up
XUT0096	TRUE	1.85729	0.03826	up	2.56294	0.00235543	up	2.61703	0.00186573	up	0.897788	0.473269	unchanged	1.7512	0.120953	unchanged
XUT0097	FALSE	0.836239	0.594537	unchanged	1.37456	0.322283	unchanged	1.90155	0.157833	unchanged	1.0556	0.664158	unchanged	1.79907	0.416759	unchanged
XUT0098	TRUE	0.758062	0.0951851	unchanged	1.92661	3.07096e-06	up	1.77065	2.12494e-05	up	2.58557	7.4086e-06	up	2.74721	1.01924e-06	up
XUT0099	TRUE	1.74162	8.48811e-10	up	2.39224	7.94905e-18	up	2.62326	1.96771e-21	up	2.63748	4.90833e-15	up	3.03906	1.79284e-20	up
XUT0101	TRUE	2.53238	5.48127e-09	up	2.34345	9.56266e-08	up	3.02143	1.36367e-12	up	2.24574	0.000749387	up	2.96986	2.306e-06	up
XUT0102	TRUE	2.75378	8.45548e-27	up	2.75752	3.99296e-26	up	3.63304	3.13671e-46	up	2.83289	4.90629e-19	up	3.31396	8.69994e-27	up
XUT0103	TRUE	1.03691	0.194348	unchanged	2.84801	4.12211e-05	up	2.5935	0.000221831	up	2.73019	0.00575742	up	2.79579	0.00368886	up
XUT0104	TRUE	2.1322	3.74204e-12	up	1.76609	2.10587e-08	up	2.66201	1.51479e-18	up	2.61796	5.16397e-10	up	3.10199	2.56586e-14	up
XUT0105	TRUE	2.48747	2.84126e-14	up	3.07276	2.94521e-21	up	3.77672	1.22537e-32	up	2.83823	1.55075e-12	up	3.51068	1.29935e-19	up
XUT0106	TRUE	2.7888	0.00024547	up	3.76639	1.71726e-07	up	3.79432	1.31882e-07	up	2.53842	0.0020899	up	2.93579	0.000211347	up
XUT0107	TRUE	2.38803	2.2187e-06	up	3.60732	6.00149e-14	up	3.90399	2.20062e-16	up	3.5622	3.29935e-09	up	3.97289	1.3592e-11	up
XUT0108	TRUE	2.91404	0.00350547	up	3.10463	0.00128702	up	3.98002	2.081e-05	up	2.17914	0.0593108	unchanged	2.82491	0.00956112	up
XUT0109	FALSE	0.632724	0.00315455	unchanged	0.863391	2.2868e-05	unchanged	1.09806	5.84712e-08	up	1.84008	5.20377e-18	up	1.4966	1.73609e-12	up
XUT0110	TRUE	2.13292	0.000248688	up	1.91757	0.000979832	up	2.77529	6.47386e-07	up	1.54052	0.0847638	unchanged	2.443	0.00291118	up
XUT0111	TRUE	2.14326	7.29877e-18	up	2.1199	4.18151e-17	up	2.4502	7.19439e-23	up	1.58356	5.25713e-06	up	2.69634	7.42668e-17	up
XUT0112	FALSE	1.16211	0.0837956	unchanged	2.20882	0.000339714	up	1.83341	0.00355171	up	2.53069	0.00231514	up	2.61683	0.0012099	up
XUT0113	FALSE	0.713477	0.377768	unchanged	1.25432	0.0857552	unchanged	1.81812	0.0104646	up	1.7948	0.107739	unchanged	0.797565	0.491822	unchanged
XUT0114	FALSE	0.255748	0.746776	unchanged	1.21531	0.0635045	unchanged	1.20602	0.0668895	unchanged	1.39532	0.110256	unchanged	1.61695	0.0526518	unchanged
XUT0115	TRUE	1.81819	1.64115e-17	up	2.00492	1.18677e-20	up	2.43083	1.63904e-30	up	1.95748	1.00336e-09	up	2.83678	3.38331e-20	up
XUT0116	TRUE	1.48333	0.0233675	up	2.46349	5.38181e-05	up	3.3016	2.09386e-08	up	2.04913	0.0274879	up	3.63933	1.63673e-05	up
XUT0117	TRUE	2.31985	0.0145881	up	3.07558	0.000597088	up	4.04571	3.07557e-06	up	1.8705	0.077515	unchanged	2.73375	0.00565844	up
XUT0118	TRUE	2.51542	1.67393e-06	up	2.53873	1.21424e-06	up	3.39589	1.72674e-11	up	2.14957	0.00111056	up	2.68783	1.78721e-05	up
XUT0119	FALSE	-0.118446	0.853371	unchanged	2.26899	1.496e-06	up	1.5626	0.00139468	up	1.41347	0.0269138	up	1.46345	0.018084	up
XUT0120	TRUE	1.19778	0.0396777	up	1.66945	0.00261683	up	2.25923	2.74776e-05	up	2.19126	0.00761577	up	2.81155	0.000300383	up
XUT0121	FALSE	0.747215	0.488172	unchanged	3.00811	0.000673927	up	2.36963	0.00909818	up	4.46259	0.0124449	up	4.64957	0.00790022	up
XUT0122	TRUE	3.67434	2.06331e-11	up	4.40457	2.40116e-16	up	4.99352	4.0889e-21	up	4.33332	2.56106e-12	up	4.56643	6.91956e-14	up
XUT0123	TRUE	3.77428	7.06306e-07	up	3.07972	6.24756e-05	up	4.38316	2.46386e-09	up	0.123267	0.910851	unchanged	2.3419	0.00316423	up
XUT0124	TRUE	4.38584	3.26194e-08	up	2.71697	0.00112487	up	4.57812	3.43517e-09	up	2.35279	0.0248841	up	3.5162	0.000295314	up
XUT0125	TRUE	2.76241	1.80957e-06	up	3.07551	6.15993e-08	up	3.57551	1.37546e-10	up	4.05282	1.17816e-05	up	5.13029	9.18032e-09	up
XUT0126	TRUE	1.69621	0.000202991	up	2.20162	6.14916e-07	up	2.53779	5.2875e-09	up	2.32994	0.000107925	up	2.68305	3.62089e-06	up
XUT0127	TRUE	2.33353	9.53658e-08	up	2.50005	8.99218e-09	up	3.13036	1.50197e-13	up	2.57254	3.31728e-05	up	3.41248	6.46772e-09	up
XUT0128	TRUE	2.72033	0.00249922	up	2.63601	0.0027319	up	3.62778	1.86653e-05	up	1.68699	0.100051	unchanged	2.97228	0.00156707	up
XUT0129	TRUE	2.32844	8.27041e-23	up	2.41991	3.9607e-24	up	3.20207	1.31138e-42	up	2.70195	7.02013e-23	up	3.23488	5.47907e-34	up
XUT0130	TRUE	1.28557	0.000653293	up	1.55616	2.45863e-05	up	2.16309	1.45669e-09	up	1.80879	0.000426492	up	2.29955	2.50756e-06	up
XUT0131	TRUE	2.23019	4.23938e-06	up	3.07016	4.76457e-11	up	3.44827	6.87907e-14	up	2.7657	7.50052e-07	up	3.18286	3.73129e-09	up
XUT0132	TRUE	2.73038	3.04348e-11	up	3.64551	1.05685e-19	up	4.02218	3.67035e-24	up	4.49171	1.11145e-17	up	4.66496	2.19878e-19	up
XUT0134	TRUE	2.65666	4.78098e-28	up	2.13903	1.55746e-17	up	3.07186	8.22593e-37	up	2.60614	6.29402e-17	up	3.296	6.66593e-28	up
XUT0135	TRUE	2.1441	0.00188418	up	2.35239	0.000455946	up	3.03125	3.26839e-06	up	2.66889	0.0103937	up	3.45173	0.000486782	up
XUT0136	TRUE	3.46747	1.36501e-05	up	3.55107	5.37134e-06	up	4.46059	4.29095e-09	up	4.08548	0.000152001	up	4.61905	1.08547e-05	up
XUT0137	TRUE	1.55883	1.30752e-05	up	3.16621	3.24246e-21	up	3.17947	1.72173e-21	up	2.85494	1.80992e-10	up	3.25903	7.32564e-14	up
XUT0138	FALSE	0.314409	0.823975	unchanged	0.453958	0.707204	unchanged	-0.338827	0.794355	unchanged	1.07181	0.495382	unchanged	0.795844	0.607054	unchanged
XUT0140	FALSE	0.123606	0.828221	unchanged	1.5372	0.000548788	up	1.32627	0.00324276	up	1.47788	0.0509724	unchanged	1.6105	0.0275455	up
XUT0141	FALSE	0.73961	0.0758172	unchanged	2.31982	4.58868e-10	up	2.38531	1.28454e-10	up	2.22542	3.59606e-05	up	2.72876	1.23888e-07	up
XUT0142	FALSE	0.94384	0.0396854	unchanged	2.43509	4.62298e-09	up	2.78875	1.02996e-11	up	2.75901	4.29613e-07	up	3.03014	1.09275e-08	up
XUT0143	TRUE	2.54716	2.25788e-07	up	2.59701	1.24231e-07	up	3.39061	9.70239e-13	up	2.30707	0.000813202	up	3.20557	6.82312e-07	up
XUT0144	FALSE	0.619718	0.566063	unchanged	1.83665	0.0450125	up	2.00699	0.0276858	up	2.15985	0.200988	unchanged	1.97035	0.233907	unchanged
XUT0145	TRUE	2.54377	2.36672e-05	up	3.62184	2.4274e-10	up	3.7937	2.48791e-11	up	1.52456	0.063341	unchanged	2.4106	0.00148813	up
XUT0146	FALSE	0.140983	0.852756	unchanged	2.00927	0.000468747	up	2.3113	4.56884e-05	up	1.45833	0.110174	unchanged	1.77749	0.0403275	up
XUT0147	TRUE	2.77217	1.28866e-27	up	2.93675	5.68683e-30	up	3.7775	7.18655e-51	up	3.11147	6.01048e-20	up	4.20095	1.11242e-37	up
XUT0148	FALSE	0.531813	0.635487	unchanged	1.99376	0.0317762	up	1.79951	0.0559502	unchanged	2.6999	0.109306	unchanged	3.15773	0.0499934	up
XUT0149	TRUE	1.47885	0.0025063	up	2.69292	3.39775e-09	up	2.85263	2.8629e-10	up	3.52964	1.3218e-06	up	3.90606	3.95713e-08	up
XUT0150	TRUE	1.22712	0.0168008	up	2.5384	7.3446e-08	up	2.55724	5.73776e-08	up	2.84458	3.94298e-05	up	2.91115	1.67481e-05	up
XUT0151	FALSE	0.607269	0.452951	unchanged	1.78527	0.0106852	up	2.25149	0.00101804	up	1.76177	0.0218745	up	1.78394	0.0167267	up
XUT0152	FALSE	1.45775	0.167306	unchanged	2.87801	0.00224679	up	2.41333	0.0122058	up	2.52977	0.0467999	up	2.88604	0.0182368	up
XUT0153	TRUE	2.05243	2.36929e-05	up	1.96588	4.66654e-05	up	2.82848	1.20226e-09	up	2.22098	0.000206355	up	2.48601	1.65826e-05	up
XUT0154	TRUE	2.05671	0.0359532	up	2.89126	0.00161985	up	3.60603	5.43475e-05	up	1.65667	0.176983	unchanged	2.00864	0.084543	unchanged
XUT0155	FALSE	2.41059	NA	NA	0	1	unchanged	5.11376	0.0505507	unchanged	3.42164	0.518194	unchanged	0	1	unchanged
XUT0156	TRUE	1.04124	0.00119506	up	2.23714	8.91552e-14	up	2.36728	2.13145e-15	up	1.56413	0.000130884	up	2.34668	1.102e-09	up
XUT0157	FALSE	1.10512	0.0767789	unchanged	2.07286	0.000319283	up	2.10366	0.000256928	up	2.36149	0.00353263	up	2.29649	0.00369875	up
XUT0158	FALSE	0.393711	0.784564	unchanged	1.37522	0.242823	unchanged	0.936236	0.443725	unchanged	0.72989	0.642103	unchanged	1.87809	0.17042	unchanged
XUT0159	FALSE	0.816177	0.464751	unchanged	1.71002	0.0807676	unchanged	2.09994	0.0293678	up	1.40182	0.29741	unchanged	1.2675	0.334269	unchanged
XUT0160	TRUE	1.96803	0.00786018	up	2.41548	0.000662683	up	3.16968	4.12524e-06	up	3.79807	6.29092e-05	up	4.66269	3.46048e-07	up
XUT0161	TRUE	0.872418	0.069032	unchanged	1.69664	0.000142392	up	2.23432	2.79952e-07	up	3.03565	1.48519e-08	up	2.84157	8.74235e-08	up
XUT0162	FALSE	0.917456	0.301219	unchanged	2.64457	0.000510832	up	2.88706	0.000129614	up	2.81265	0.0120446	up	2.78197	0.0112144	up
XUT0163	FALSE	0.556603	0.468867	unchanged	1.43708	0.0329051	up	1.54141	0.02175	up	0.673615	0.488572	unchanged	0.882328	0.335551	unchanged
XUT0164	FALSE	1.20354	0.231757	unchanged	3.25098	0.000164913	up	2.97209	0.000656592	up	1.40689	0.265122	unchanged	2.10576	0.0729632	unchanged
XUT0165	FALSE	0.239345	0.786613	unchanged	2.12906	0.00181604	up	1.77559	0.0108098	up	2.3596	0.0228534	up	2.2124	0.0295316	up
XUT0166	TRUE	1.21095	4.49168e-07	up	1.72811	1.73189e-13	up	2.02469	2.38676e-18	up	2.38628	4.12428e-16	up	2.58321	1.86557e-19	up
XUT0167	TRUE	2.43195	5.41366e-05	up	2.94228	4.40943e-07	up	3.9255	3.53102e-12	up	3.23879	1.21688e-05	up	3.22524	9.20774e-06	up
XUT0169	TRUE	2.34251	6.47175e-08	up	2.11685	1.49e-06	up	3.07008	3.05517e-13	up	2.15558	0.000803796	up	2.90974	1.62026e-06	up
XUT0170	TRUE	0.865935	0.00442673	unchanged	1.94868	6.7436e-12	up	2.1056	8.04157e-14	up	1.96218	9.18176e-08	up	2.18486	8.23777e-10	up
XUT0171	FALSE	0	NA	NA	4.10871	0.14637	unchanged	3.97696	0.163661	unchanged	3.47075	0.319461	unchanged	2.95467	0.395253	unchanged
XUT0172	FALSE	0	NA	NA	4.84074	0.0367977	up	4.98047	0.0315386	up	5.04077	0.0519029	unchanged	2.95056	0.283566	unchanged
XUT0173	FALSE	1.36503	0.139557	unchanged	1.64545	0.0594275	unchanged	1.68538	0.0536235	unchanged	2.92572	0.0289337	up	2.87523	0.028076	up
XUT0174	TRUE	1.53267	0.0709309	unchanged	1.87212	0.0204792	up	2.165	0.0065736	up	2.34849	0.0520047	unchanged	2.74018	0.017322	up
XUT0175	FALSE	0.622774	0.539982	unchanged	1.99444	0.0202588	up	2.03693	0.0177792	up	2.35867	0.0767547	unchanged	2.07241	0.114624	unchanged
XUT0176	TRUE	2.06866	5.63958e-11	up	2.53851	4.6406e-16	up	3.07098	1.38867e-23	up	3.01578	1.09306e-13	up	3.04428	2.46543e-14	up
XUT0178	TRUE	3.21516	6.08699e-09	up	4.22802	2.86122e-15	up	4.11728	1.4994e-14	up	4.18994	3.21005e-10	up	4.6603	9.25883e-13	up
XUT0179	TRUE	2.01203	7.97877e-11	up	2.551	8.2603e-17	up	3.01221	1.35134e-23	up	2.48328	5.14366e-09	up	3.2431	1.4102e-15	up
XUT0180	TRUE	2.23083	6.84822e-09	up	2.53744	3.04071e-11	up	3.01508	8.53888e-16	up	3.43749	3.35981e-12	up	3.78245	4.44081e-15	up
XUT0181	TRUE	0.53952	0.474462	unchanged	3.27433	3.64051e-08	up	3.98579	7.45507e-12	up	2.74122	0.0332495	up	4.04793	0.000784644	up
XUT0182	TRUE	2.95011	0.000620544	up	3.89706	1.76871e-06	up	4.02652	7.10438e-07	up	3.7141	4.95319e-05	up	4.09404	4.43281e-06	up
XUT0183	TRUE	3.42059	0.000254284	up	3.42906	0.000170041	up	4.30796	1.16774e-06	up	4.60773	0.00568087	up	5.80411	0.000311282	up
XUT0184	TRUE	1.82239	0.00382215	up	1.81983	0.00335159	up	2.79511	2.31834e-06	up	2.43412	0.0274975	up	4.8578	9.56546e-07	up
XUT0185	TRUE	0.86172	NA	NA	0.378133	0.82689	unchanged	1.19026	0.457449	unchanged	2.49032	0.443398	unchanged	4.03785	0.161909	unchanged
XUT0187	TRUE	3.96287	5.50088e-21	up	3.10123	1.1486e-12	up	4.61069	1.80722e-28	up	3.34961	1.49806e-09	up	4.96932	2.70818e-21	up
XUT0188	TRUE	1.54363	0.0613195	unchanged	1.75591	0.0261276	up	2.05302	0.00838226	up	0.031322	0.992574	unchanged	1.777	0.166894	unchanged
XUT0189	TRUE	1.85851	6.09898e-17	up	4.18518	3.1827e-87	up	4.22441	4.38385e-89	up	3.25776	1.36497e-27	up	3.71235	6.42902e-37	up
XUT0190	TRUE	1.94909	0.00208993	up	4.88052	2.80846e-18	up	4.8739	2.4452e-18	up	3.7953	7.51009e-05	up	4.74297	2.77991e-07	up
XUT0191	TRUE	2.47006	0.000326958	up	2.94455	9.08904e-06	up	3.25718	6.57691e-07	up	2.55982	0.00379181	up	3.30757	7.72411e-05	up
XUT0192	FALSE	0.551778	0.509176	unchanged	2.88303	1.82864e-05	up	2.70743	6.47729e-05	up	2.54777	0.00822635	up	3.08461	0.000828533	up
XUT0193	TRUE	1.69265	0.11114	unchanged	3.36687	0.000383743	up	2.72563	0.00508187	up	3.55157	0.00622561	up	3.2341	0.0118948	up
XUT0195	TRUE	2.56858	1.02909e-13	up	2.48749	1.09081e-12	up	3.35412	4.28398e-23	up	2.21279	2.61966e-06	up	3.05145	6.77925e-12	up
XUT0197	TRUE	2.44716	NA	NA	-0.282973	0.931193	unchanged	2.23906	0.440194	unchanged	1.06809	0.766291	unchanged	1.71228	0.601679	unchanged
XUT0198	TRUE	2.74067	9.79918e-05	up	3.47265	2.5352e-07	up	3.63495	5.60242e-08	up	3.94857	0.00055433	up	4.67347	2.46674e-05	up
XUT0199	TRUE	1.25773	0.262134	unchanged	1.48305	0.156808	unchanged	2.14367	0.034057	up	3.23333	0.0154276	up	3.59875	0.00540232	up
XUT0200	TRUE	1.81878	6.2051e-05	up	2.53612	6.64584e-09	up	3.51623	6.94335e-17	up	3.11158	1.58628e-07	up	3.94144	4.37654e-12	up
XUT0201	TRUE	1.37948	0.121391	unchanged	3.92823	2.10939e-07	up	4.72035	1.94006e-10	up	4.24614	0.00128566	up	5.20139	4.60651e-05	up
XUT0202	TRUE	3.29268	3.64429e-61	up	2.50237	1.06147e-33	up	3.67061	4.05732e-75	up	2.44069	5.24729e-22	up	3.63914	5.54444e-51	up
XUT0203	TRUE	1.87188	1.18214e-08	up	3.58022	1.35623e-30	up	3.78156	1.56652e-34	up	3.45254	4.40809e-15	up	4.2096	6.3454e-23	up
XUT0204	TRUE	1.64251	0.00462195	up	3.29217	5.25439e-10	up	3.26865	6.8716e-10	up	3.61101	5.42376e-08	up	3.64978	2.34157e-08	up
XUT0207	TRUE	1.31457	NA	NA	0	1	unchanged	0	1	unchanged	NA	NA	NA	NA	NA	NA
XUT0208	FALSE	1.70923	0.137102	unchanged	2.88244	0.00564774	up	2.19303	0.0413785	up	3.99405	0.00689343	up	3.96953	0.00634146	up
XUT0209	TRUE	2.0157	3.11381e-10	up	2.72843	4.15398e-18	up	3.03216	1.70485e-22	up	2.45896	7.83165e-09	up	3.03881	1.07992e-13	up
XUT0210	TRUE	1.31868	0.0468895	up	2.73032	6.04477e-06	up	2.41732	7.8235e-05	up	2.81673	0.000743773	up	2.23753	0.00746499	up
XUT0211	TRUE	1.80091	0.0186336	up	3.13358	8.71796e-06	up	2.94536	3.32711e-05	up	4.0914	3.4812e-06	up	3.96592	5.47027e-06	up
XUT0212	TRUE	2.55195	8.46256e-12	up	2.64371	1.8473e-12	up	3.58612	5.48888e-23	up	3.53882	2.34724e-13	up	4.07214	5.1223e-18	up
XUT0213	FALSE	0.439353	0.487628	unchanged	1.51264	0.00567716	up	1.41896	0.0100192	up	1.48273	0.0206547	up	1.74521	0.0043921	up
XUT0214	FALSE	0.952619	0.319397	unchanged	2.0421	0.0156809	up	1.14668	0.2003	unchanged	0.8899	0.455315	unchanged	0.697177	0.551329	unchanged
XUT0216	TRUE	1.18732	0.0583512	unchanged	1.80168	0.00230151	up	2.41085	2.63839e-05	up	3.11391	0.0004855	up	3.69572	1.65338e-05	up
XUT0217	TRUE	4.30527	0.033256	up	5.98029	0.00120696	up	5.96865	0.00123597	up	3.37329	0.0987902	unchanged	3.66016	0.0640459	unchanged
XUT0218	TRUE	4.29927	0.0428409	up	4.51153	0.0261902	up	5.98066	0.00202975	up	2.4603	0.40434	unchanged	4.73922	0.0593039	unchanged
XUT0219	TRUE	4.90277	NA	NA	4.51159	0.0306211	up	5.12043	0.0122062	up	1.08749	0.718623	unchanged	2.77878	0.278201	unchanged
XUT0220	FALSE	0.249513	0.725945	unchanged	1.32258	0.0239721	up	1.22213	0.0387863	up	1.25679	0.176905	unchanged	1.86472	0.0314363	up
XUT0221	FALSE	0.450773	NA	NA	2.14371	0.179071	unchanged	2.34964	0.137976	unchanged	5.05561	0.0201539	up	5.21035	0.0143977	up
XUT0222	FALSE	-0.476841	0.610544	unchanged	2.58279	0.000206026	up	2.10513	0.00309508	up	3.22284	0.000112128	up	2.69114	0.00126222	up
XUT0223	FALSE	1.61327	5.6346e-05	up	1.98878	3.62123e-07	up	2.45318	1.43123e-10	up	2.03	2.62867e-05	up	2.32284	5.91261e-07	up
XUT0224	TRUE	0.845221	0.280316	unchanged	2.73605	4.26059e-05	up	2.63073	8.98333e-05	up	4.03848	3.17554e-05	up	4.24166	8.40059e-06	up
XUT0226	TRUE	2.53339	1.01722e-06	up	2.66927	2.0164e-07	up	3.36293	1.63987e-11	up	2.58502	0.00201014	up	3.7962	1.07374e-06	up
XUT0228	TRUE	1.76297	0.0750741	unchanged	1.879	0.0492519	up	2.95917	0.00109668	up	3.92137	0.000848881	up	3.87469	0.000822192	up
XUT0229	FALSE	0.167502	0.833564	unchanged	2.37446	6.9206e-05	up	1.62364	0.00884166	up	1.49565	0.122162	unchanged	1.57054	0.0928268	unchanged
XUT0230	TRUE	0.494387	0.467465	unchanged	1.80997	0.00188964	up	2.39998	2.48869e-05	up	2.19847	0.00105567	up	2.00553	0.00240131	up
XUT0231	TRUE	1.02125	0.0147905	up	1.99117	3.60716e-07	up	2.13884	3.71265e-08	up	2.48139	7.14329e-06	up	2.59358	1.45793e-06	up
XUT0232	TRUE	2.82587	6.68638e-07	up	3.66508	2.4525e-11	up	4.24367	3.687e-15	up	3.0948	2.27027e-07	up	3.31717	1.25639e-08	up
XUT0233	FALSE	0.318341	0.732486	unchanged	1.87612	0.0119169	up	1.53332	0.0443593	up	2.58397	0.0278175	up	2.39054	0.0384113	up
XUT0234	TRUE	1.90964	4.71015e-09	up	3.4411	2.28204e-28	up	3.95655	4.75755e-38	up	3.06272	1.81391e-13	up	3.94451	7.70626e-23	up
XUT0235	TRUE	1.91464	2.11622e-15	up	2.47856	5.31927e-25	up	2.67919	2.00073e-29	up	2.50792	1.04014e-16	up	2.79075	3.22414e-21	up
XUT0236	TRUE	2.31654	0.000475381	up	3.03405	1.68534e-06	up	3.33002	1.04516e-07	up	3.43786	0.000708851	up	4.38181	6.49444e-06	up
XUT0237	TRUE	0.994813	0.173289	unchanged	1.99415	0.00263154	up	2.40939	0.000211027	up	1.42695	0.165687	unchanged	1.84229	0.0577547	unchanged
XUT0238	TRUE	1.44844	0.0467676	up	2.43821	0.000305864	up	2.7967	2.6161e-05	up	1.6062	0.0854646	unchanged	1.7107	0.0569187	unchanged
XUT0239	TRUE	2.90965	6.07913e-06	up	2.55484	7.57371e-05	up	3.36164	7.08734e-08	up	1.84241	0.0881785	unchanged	3.26412	0.000779794	up
XUT0240	TRUE	1.96246	0.0107338	up	2.82723	9.30079e-05	up	2.9414	4.4167e-05	up	2.05761	0.0888006	unchanged	2.32567	0.0443963	up
XUT0241	FALSE	0.6984	0.277345	unchanged	2.44553	9.22296e-06	up	2.42718	1.1026e-05	up	1.86452	0.00853719	up	2.54176	0.000141134	up
XUT0242	FALSE	0.703664	0.204533	unchanged	2.36732	9.81556e-07	up	2.20256	6.21877e-06	up	2.54966	0.000137248	up	2.48818	0.000152909	up
XUT0243	TRUE	5.12064	0.00432655	up	7.20432	1.34183e-05	up	7.39388	7.25612e-06	up	4.8487	0.00736179	up	4.36534	0.0153319	up
XUT0244	TRUE	2.80798	0.000870657	up	3.52265	1.15736e-05	up	3.79083	1.89868e-06	up	2.19966	0.0699521	unchanged	3.21868	0.00423778	up
XUT0245	TRUE	3.82961	1.85139e-20	up	4.66933	3.75693e-30	up	5.43196	1.84795e-41	up	4.27946	2.09395e-17	up	5.44542	1.3435e-28	up
XUT0246	TRUE	2.58236	0.00251434	up	3.07723	0.000166885	up	2.9107	0.000405913	up	3.01909	0.00374748	up	3.20592	0.00154276	up
XUT0247	FALSE	1.81298	0.00599115	up	1.54131	0.0185881	up	1.66209	0.010682	up	2.33585	0.00569064	up	2.13039	0.0102676	up
XUT0248	FALSE	0.614139	0.29751	unchanged	1.7988	0.000530469	up	1.33878	0.012193	up	1.86505	0.0161585	up	2.03449	0.00643461	up
XUT0249	TRUE	1.7681	6.40668e-06	up	2.59231	6.72753e-12	up	3.2039	3.5501e-18	up	2.83485	1.22969e-07	up	3.74988	2.42049e-13	up
XUT0250	TRUE	2.02034	4.43327e-09	up	2.31161	1.52057e-11	up	2.70838	8.72785e-16	up	2.71926	2.26547e-10	up	3.19394	1.23601e-14	up
XUT0251	TRUE	3.10499	0.000197633	up	3.98001	5.19769e-07	up	4.79338	6.70515e-10	up	2.1516	0.0332317	up	2.50128	0.00999201	up
XUT0252	TRUE	2.71181	2.6422e-06	up	3.11869	3.2541e-08	up	3.53563	1.90018e-10	up	2.99337	5.44643e-05	up	3.53641	7.28144e-07	up
XUT0253	TRUE	1.90212	2.83997e-09	up	2.31041	3.17495e-13	up	2.94989	1.57625e-21	up	2.51223	2.03066e-08	up	3.4165	1.13322e-15	up
XUT0254	TRUE	2.20592	7.73103e-09	up	2.46186	9.34203e-11	up	3.05081	2.02857e-16	up	4.7272	1.74627e-12	up	4.84692	2.60519e-13	up
XUT0255	TRUE	3.54039	4.32926e-21	up	3.14297	2.4366e-16	up	4.15371	5.8709e-29	up	3.02028	8.1449e-11	up	3.60193	9.45883e-16	up
XUT0256	TRUE	1.97118	NA	NA	2.27674	0.258316	unchanged	2.91374	0.137796	unchanged	4.06998	0.18228	unchanged	0	1	unchanged
XUT0257	TRUE	2.87878	1.10309e-46	up	1.99159	2.0755e-21	up	3.05146	2.0973e-51	up	1.66807	3.79397e-08	up	3.54199	4.08722e-36	up
XUT0258	TRUE	2.06662	8.38073e-07	up	1.71592	6.08987e-05	up	2.70177	3.22936e-11	up	2.3489	0.000113042	up	2.61455	8.54994e-06	up
XUT0259	FALSE	1.10488	0.158193	unchanged	2.20741	0.00182755	up	2.41039	0.000599704	up	5.219	0.00134895	up	6.08055	0.000133489	up
XUT0260	TRUE	1.26821	0.0765753	unchanged	2.61421	5.61424e-05	up	3.5605	1.42347e-08	up	4.32678	2.11155e-06	up	5.14004	7.13917e-09	up
XUT0261	TRUE	1.70033	8.30545e-06	up	3.2505	9.97102e-20	up	3.78876	4.69154e-27	up	4.14073	5.69353e-14	up	4.75151	1.23071e-18	up
XUT0262	TRUE	4.50968	0.0239735	up	5.52658	0.00295981	up	6.45669	0.000393513	up	2.48791	0.419695	unchanged	3.78837	0.165871	unchanged
XUT0263	TRUE	1.45066	0.206293	unchanged	1.23156	0.263816	unchanged	1.03748	0.355596	unchanged	1.05737	0.55176	unchanged	2.2559	0.146761	unchanged
XUT0264	TRUE	3.83899	1.39288e-23	up	4.13432	6.4284e-27	up	4.90354	1.52384e-38	up	4.30735	2.43346e-16	up	5.23241	1.9233e-24	up
XUT0266	TRUE	2.52965	2.34726e-05	up	2.0648	0.000666201	up	2.93931	4.11374e-07	up	2.60507	0.000589734	up	3.06617	2.43638e-05	up
XUT0267	TRUE	4.45993	0.000880799	up	3.77213	0.00417053	up	5.17786	4.46095e-05	up	1.05082	0.362715	unchanged	1.61969	0.126916	unchanged
XUT0268	TRUE	2.19058	2.06315e-07	up	2.39611	9.56218e-09	up	3.17404	5.19142e-15	up	3.35631	5.34274e-08	up	4.18997	1.85559e-12	up
XUT0269	TRUE	1.81552	0.00080414	up	2.08749	7.8156e-05	up	2.50222	1.33874e-06	up	2.0051	0.0101426	up	2.72152	0.000225257	up
XUT0270	TRUE	1.47937	0.0354232	up	1.86395	0.00553102	up	2.44017	0.000192181	up	2.72252	0.00464146	up	3.02013	0.00112874	up
XUT0271	TRUE	1.12901	0.107061	unchanged	1.56344	0.0178933	up	1.75517	0.00733052	up	2.1033	0.0180722	up	1.99639	0.0217841	up
XUT0272	FALSE	1.25707	0.000250321	up	2.19735	1.50278e-11	up	2.44389	3.24442e-14	up	2.26247	1.13611e-07	up	2.32248	2.43633e-08	up
XUT0273	TRUE	2.63663	0.00693317	up	3.66156	6.20479e-05	up	3.9235	1.49206e-05	up	3.74581	0.000278541	up	3.77684	0.000192619	up
XUT0274	TRUE	3.02486	7.05255e-06	up	3.9536	8.85241e-10	up	3.90508	1.39807e-09	up	4.91404	1.5776e-06	up	4.93335	1.11743e-06	up
XUT0275	TRUE	2.99911	1.46791e-09	up	2.76664	3.66628e-08	up	3.8675	9.72058e-16	up	2.54232	0.00039737	up	3.87452	7.00942e-09	up
XUT0276	TRUE	3.6321	7.26992e-07	up	5.3214	1.96311e-14	up	5.79113	4.11562e-17	up	4.95409	6.44182e-09	up	5.78781	4.68169e-12	up
XUT0277	TRUE	1.76996	0.031627	up	2.54582	0.00099699	up	3.05656	5.39506e-05	up	3.03454	0.00665915	up	3.13111	0.00402497	up
XUT0278	TRUE	1.81587	0.088864	unchanged	2.25957	0.0252348	up	3.37579	0.000449947	up	4.21154	0.0240019	up	4.32265	0.0181262	up
XUT0279	TRUE	1.00628	1.41201e-06	up	1.89078	4.85646e-21	up	2.10655	3.75769e-26	up	2.43328	5.35319e-25	up	2.46739	1.83765e-26	up
XUT0280	TRUE	2.38525	1.03848e-11	up	3.72927	4.75334e-28	up	3.93028	1.8522e-31	up	3.68184	9.8467e-18	up	3.75355	7.1225e-19	up
XUT0281	TRUE	2.15739	1.86443e-13	up	2.64343	6.39063e-20	up	3.14079	4.50473e-28	up	1.80502	8.26518e-07	up	2.89275	3.42937e-17	up
XUT0282	TRUE	2.51546	8.75361e-46	up	2.61767	1.36905e-48	up	3.16863	4.30409e-72	up	2.59105	2.25747e-34	up	3.17539	5.2196e-53	up
XUT0283	TRUE	2.02159	4.22975e-05	up	3.63048	2.9438e-15	up	4.27434	3.01449e-21	up	3.79669	1.65222e-08	up	4.16815	2.55739e-10	up
XUT0284	TRUE	0.585767	0.460371	unchanged	1.923	0.00462413	up	1.97952	0.00349753	up	1.09175	0.303427	unchanged	2.11653	0.027899	up
XUT0285	TRUE	3.0783	0.00788922	up	4.02119	0.000215738	up	4.5425	2.24304e-05	up	4.02481	0.0222263	up	5.48192	0.00109725	up
XUT0287	TRUE	1.80218	0.0364169	up	1.88466	0.023906	up	2.3525	0.00390093	up	2.48938	0.0202973	up	2.25503	0.0327015	up
XUT0288	TRUE	0.876987	0.45456	unchanged	1.09187	0.30997	unchanged	1.70966	0.0988221	unchanged	3.12367	0.0261701	up	2.94307	0.0333522	up
XUT0289	TRUE	0.986732	0.121391	unchanged	1.23816	0.0413989	up	1.82772	0.00184643	up	1.76341	0.0411112	up	1.94386	0.0191885	up
XUT0290	TRUE	1.56834	0.00769679	up	2.68812	9.33985e-07	up	2.73841	5.57662e-07	up	2.80941	8.03112e-05	up	2.44826	0.000549522	up
XUT0291	TRUE	1.24249	0.0250873	up	1.60462	0.00257279	up	1.79469	0.000663025	up	1.79988	0.0212441	up	2.02882	0.00673044	up
XUT0292	TRUE	2.36259	2.24445e-08	up	4.28749	7.39161e-27	up	4.37686	3.06305e-28	up	4.63	1.52492e-13	up	4.85023	4.71991e-15	up
XUT0293	TRUE	1.04927	0.0728594	unchanged	1.56836	0.00434519	up	1.33463	0.0168874	up	2.65592	0.000271222	up	2.37651	0.000990315	up
XUT0294	TRUE	1.98383	0.00133577	up	3.62276	1.98361e-10	up	3.54693	4.87241e-10	up	3.8796	1.14982e-07	up	3.75921	2.08328e-07	up
XUT0295	TRUE	1.35756	0.0300111	up	3.64103	3.38643e-11	up	3.91852	5.9269e-13	up	3.89184	1.48568e-06	up	4.49372	1.12343e-08	up
XUT0296	FALSE	3.03683	0.122614	unchanged	3.61526	0.0474967	up	4.69219	0.00802256	up	0.988121	0.623145	unchanged	1.22527	0.516636	unchanged
XUT0297	FALSE	0.201056	0.696608	unchanged	2.4847	4.74124e-10	up	2.12903	1.48076e-07	up	2.54499	3.68109e-06	up	2.90294	4.69248e-08	up
XUT0298	FALSE	NA	NA	NA	NA	NA	NA	NA	NA	NA	NA	NA	NA	NA	NA	NA
XUT0299	FALSE	1.7184	0.0567384	unchanged	3.29513	5.19778e-05	up	3.25234	6.65128e-05	up	2.2466	0.0317232	up	2.06226	0.0445515	up
XUT0300	TRUE	1.8392	1.7832e-05	up	2.36364	1.33541e-08	up	2.69169	5.43194e-11	up	3.43101	3.332e-09	up	3.35154	4.89356e-09	up
XUT0301	FALSE	-0.145227	0.840904	unchanged	1.34765	0.0169971	up	0.948631	0.101745	unchanged	1.67722	0.0146897	up	0.925627	0.185418	unchanged
XUT0302	FALSE	0.412522	0.644638	unchanged	1.7556	0.0180862	up	1.50283	0.0467282	up	2.07186	0.0213445	up	2.07161	0.018053	up
XUT0303	FALSE	0.981898	0.523945	unchanged	0.465993	0.762237	unchanged	2.70661	0.0371162	up	2.48619	0.403122	unchanged	2.95036	0.2796	unchanged
XUT0304	FALSE	0.164708	0.594745	unchanged	0.779584	0.00361043	unchanged	0.734843	0.00636996	unchanged	0.749488	0.0327008	unchanged	1.00927	0.0025276	up
XUT0305	TRUE	2.54099	1.17643e-29	up	2.5929	5.645e-30	up	3.5199	2.10589e-56	up	3.03302	2.12625e-31	up	3.66099	2.73672e-47	up
XUT0307	TRUE	1.57662	0.0109134	up	1.63202	0.00724786	up	2.43132	3.00897e-05	up	1.68818	0.0362236	up	2.44212	0.00118161	up
XUT0308	TRUE	1.0864	0.0586212	unchanged	1.92596	0.000318704	up	2.34532	7.62987e-06	up	1.54794	0.0442795	up	1.84993	0.0116237	up
XUT0309	TRUE	2.37659	0.0141237	up	2.36697	0.0126034	up	3.78201	2.27527e-05	up	5.79953	0.00153567	up	6.10691	0.000660774	up
XUT0310	TRUE	1.4221	0.000989303	up	2.99762	4.45942e-14	up	3.63227	9.21249e-21	up	4.39252	6.91426e-13	up	5.06965	2.5558e-17	up
XUT0311	TRUE	2.69072	6.55713e-46	up	1.83884	3.82794e-21	up	2.90788	4.9149e-53	up	1.82305	4.51313e-16	up	3.06712	1.06448e-46	up
XUT0312	TRUE	2.66279	0.000174678	up	3.49988	2.22824e-07	up	3.5067	2.05128e-07	up	6.38105	3.07111e-05	up	6.34462	3.02104e-05	up
XUT0313	TRUE	-0.0954222	0.949697	unchanged	2.53467	0.0115903	up	3.47961	0.000357313	up	4.96349	0.00384205	up	5.20907	0.00202809	up
XUT0314	TRUE	1.22941	0.0611429	unchanged	2.16851	0.000364034	up	2.95704	4.74737e-07	up	3.42604	0.000162618	up	3.44147	0.000115186	up
XUT0315	FALSE	0.297461	0.667647	unchanged	1.27748	0.0282213	up	0.670565	0.27211	unchanged	1.52219	0.0773905	unchanged	1.78254	0.0302965	up
XUT0316	TRUE	2.20373	4.91801e-08	up	1.58511	0.000148772	up	2.9572	4.58401e-14	up	1.9222	0.000164055	up	2.46137	3.49442e-07	up
XUT0317	TRUE	1.62122	0.0108462	up	2.18047	0.000334035	up	2.93248	6.11016e-07	up	2.44376	0.00357999	up	2.68121	0.000930441	up
XUT0319	TRUE	3.25801	6.05701e-06	up	3.69148	1.32768e-07	up	4.20566	9.90763e-10	up	3.12442	0.00101347	up	3.97282	1.1747e-05	up
XUT0320	TRUE	1.93614	0.344928	unchanged	4.35604	0.0109308	up	5.48932	0.00103166	up	2.68934	0.278384	unchanged	3.13828	0.186469	unchanged
XUT0321	TRUE	2.59295	0.00150152	up	2.78327	0.000454939	up	3.68969	1.47726e-06	up	3.56033	0.00199379	up	4.2774	0.000113742	up
XUT0322	TRUE	1.45315	0.0265886	up	1.04167	0.114204	unchanged	1.92018	0.00209193	up	1.87201	0.0413074	up	1.9957	0.0245199	up
XUT0323	TRUE	2.94413	0.00200662	up	3.64561	5.5346e-05	up	4.07427	5.06632e-06	up	2.81344	0.00323972	up	2.62023	0.00534515	up
XUT0324	TRUE	2.34007	7.34704e-11	up	2.92308	1.73679e-16	up	3.60912	2.12219e-25	up	4.06802	2.91028e-14	up	4.55585	3.49546e-18	up
XUT0325	TRUE	3.08669	5.90018e-12	up	3.02921	2.16616e-11	up	4.29116	5.254e-23	up	2.29	4.62741e-05	up	3.69634	1.51912e-12	up
XUT0326	TRUE	2.52311	3.3296e-19	up	3.17625	1.12257e-29	up	3.45111	1.748e-35	up	2.88756	4.28415e-15	up	4.04471	1.18111e-30	up
XUT0327	TRUE	1.21539	0.12056	unchanged	2.6038	0.000210407	up	2.40055	0.000716195	up	3.28203	0.00377351	up	3.43775	0.00186177	up
XUT0328	TRUE	1.43647	0.0732486	unchanged	2.9119	5.77367e-05	up	2.98526	3.55733e-05	up	4.27661	6.94546e-05	up	4.78412	5.17121e-06	up
XUT0331	TRUE	2.42334	1.4368e-11	up	2.60777	4.36812e-13	up	3.37563	4.57479e-22	up	3.05992	1.03117e-09	up	3.87453	8.47641e-16	up
XUT0332	FALSE	0.637772	0.622081	unchanged	2.36957	0.0246714	up	3.06044	0.00285913	up	2.41743	0.0897258	unchanged	1.93313	0.173251	unchanged
XUT0333	TRUE	3.22107	1.39433e-17	up	5.0644	2.82963e-43	up	5.27001	2.10385e-47	up	4.44312	3.12271e-29	up	4.88484	4.99199e-36	up
XUT0334	FALSE	0.773862	0.378679	unchanged	2.91859	6.8446e-05	up	1.87827	0.0148051	up	2.93716	0.0236295	up	3.63478	0.00334642	up
XUT0335	TRUE	3.40766	1.51561e-15	up	3.70502	3.54011e-18	up	4.55294	8.79533e-28	up	4.01805	2.69041e-09	up	5.32385	3.48672e-16	up
XUT0336	FALSE	0.707301	0.540535	unchanged	1.35517	0.182684	unchanged	1.49842	0.138988	unchanged	1.52111	0.201304	unchanged	1.46805	0.203428	unchanged
XUT0337	FALSE	1.13617	0.128564	unchanged	2.76132	3.05285e-05	up	2.61735	8.59957e-05	up	2.48749	0.0101601	up	2.52826	0.00722909	up
XUT0338	FALSE	2.06224	0.0434082	up	3.84739	2.93637e-05	up	3.62941	8.96424e-05	up	2.97525	0.00204381	up	1.727	0.0822433	unchanged
XUT0339	TRUE	1.04127	0.0740574	unchanged	2.14801	5.77189e-05	up	1.87735	0.00053024	up	1.77855	0.0237144	up	2.16254	0.00394091	up
XUT0340	TRUE	3.83032	9.15263e-19	up	3.86593	6.64831e-19	up	4.64658	1.13526e-27	up	3.74176	1.58576e-11	up	4.64491	5.33722e-18	up
XUT0341	TRUE	1.52714	0.199922	unchanged	2.08789	0.058153	unchanged	3.0045	0.00452637	up	3.49754	0.149133	unchanged	4.95531	0.024801	up
XUT0343	TRUE	1.58319	0.02362	up	2.38891	0.000278446	up	2.86501	8.54641e-06	up	3.03956	0.00028488	up	3.90302	1.1133e-06	up
XUT0344	TRUE	2.19543	0.0192428	up	2.59924	0.0037942	up	3.30204	0.00015161	up	3.99481	0.00352039	up	4.51908	0.000678074	up
XUT0345	TRUE	2.85267	5.60517e-10	up	3.31001	3.0297e-13	up	3.91965	1.30945e-18	up	4.1911	1.70527e-11	up	4.73557	7.88438e-15	up
XUT0346	FALSE	1.36974	0.0191252	up	2.07164	0.000178702	up	2.57709	1.84031e-06	up	1.61191	0.022309	up	2.0364	0.00244298	up
XUT0347	TRUE	0.756067	0.339162	unchanged	3.02214	3.9514e-06	up	3.09213	2.20776e-06	up	3.82502	1.38341e-06	up	3.57537	5.41789e-06	up
XUT0348	FALSE	0.442803	0.328261	unchanged	1.94566	6.33622e-07	up	1.72898	1.19944e-05	up	2.66012	3.98472e-08	up	3.04191	1.22225e-10	up
XUT0349	TRUE	1.6051	2.85198e-05	up	1.45409	0.000155625	up	1.94171	2.15227e-07	up	1.17989	0.0204936	up	1.81677	0.000130061	up
XUT0350	FALSE	0.399644	0.508316	unchanged	1.85149	0.000284588	up	1.2927	0.0142235	up	1.62463	0.0221047	up	1.82745	0.00728558	up
XUT0351	TRUE	1.23352	0.121873	unchanged	2.04465	0.00544523	up	2.1357	0.00356896	up	1.85442	0.081277	unchanged	2.40324	0.0165695	up
XUT0352	TRUE	3.54428	3.95602e-10	up	3.36809	2.80243e-09	up	4.29389	6.91687e-15	up	2.972	3.38977e-06	up	4.01167	4.48539e-11	up
XUT0353	TRUE	2.5865	2.37877e-06	up	3.04724	1.22684e-08	up	3.53394	1.72535e-11	up	3.396	7.06531e-06	up	4.36954	1.572e-09	up
XUT0354	TRUE	3.08204	0.0849025	unchanged	5.28182	0.000932205	up	5.87041	0.000203116	up	3.09433	0.0459608	up	4.06206	0.005753	up
XUT0356	FALSE	0.181084	0.780014	unchanged	0.779229	0.149363	unchanged	0.963554	0.0719136	unchanged	1.19999	0.0669261	unchanged	1.54628	0.0126631	up
XUT0357	TRUE	0.681825	0.494731	unchanged	0.473118	0.61705	unchanged	1.80064	0.0373495	up	2.51389	0.0589897	unchanged	1.55152	0.254466	unchanged
XUT0358	TRUE	0.801896	0.635327	unchanged	1.06634	0.48588	unchanged	2.44278	0.0808611	unchanged	0	1	unchanged	3.9565	0.196023	unchanged
XUT0359	TRUE	2.92361	0.00208195	up	2.36706	0.0129142	up	3.54926	8.42337e-05	up	3.42083	0.0182848	up	4.02157	0.00391204	up
XUT0360	FALSE	0.652668	0.409214	unchanged	2.16017	0.00137675	up	2.16723	0.0013441	up	1.92371	0.0336048	up	1.84526	0.0366791	up
XUT0361	TRUE	2.92585	2.22262e-12	up	3.29812	1.66996e-15	up	3.83141	4.68493e-21	up	3.46048	1.51907e-10	up	4.12298	3.60495e-15	up
XUT0362	TRUE	2.06658	0.0029983	up	2.2616	0.000865943	up	3.0796	2.47131e-06	up	2.85954	0.00211553	up	3.49734	8.41149e-05	up
XUT0363	TRUE	2.14167	0.0320659	up	3.25202	0.000438147	up	3.51637	0.000125496	up	2.2619	0.110745	unchanged	3.83501	0.00320994	up
XUT0364	FALSE	2.34084	0.000178003	up	2.83045	2.71098e-06	up	3.27668	3.20285e-08	up	3.51878	3.84832e-05	up	3.66351	1.19043e-05	up
XUT0365	TRUE	2.45754	8.74201e-13	up	2.74146	1.56775e-15	up	3.36295	1.46095e-23	up	2.85428	2.23582e-10	up	3.59051	1.03732e-16	up
XUT0366	TRUE	2.80063	0.0362966	up	4.5497	0.000211486	up	4.65624	0.000145261	up	5.04698	3.31948e-05	up	5.65224	2.19745e-06	up
XUT0367	TRUE	1.5511	0.0145831	up	2.77243	2.36438e-06	up	3.03298	1.908e-07	up	2.156	0.00275181	up	2.79727	3.97444e-05	up
XUT0368	FALSE	0.560004	0.260484	unchanged	2.58274	8.69974e-10	up	2.57236	1.01448e-09	up	2.47692	1.74899e-05	up	2.56947	4.89461e-06	up
XUT0369	TRUE	2.09074	8.5499e-05	up	3.27042	7.35605e-11	up	3.3805	1.32533e-11	up	3.57265	1.06002e-07	up	4.21104	1.01868e-10	up
XUT0370	TRUE	2.0484	4.10861e-07	up	3.1992	1.43716e-16	up	3.30382	9.97737e-18	up	2.87875	1.1837e-08	up	3.42275	2.12961e-12	up
XUT0371	TRUE	2.01646	1.18103e-20	up	1.8401	6.75464e-17	up	2.63794	1.07398e-34	up	1.99832	3.76623e-12	up	2.68604	5.15438e-22	up
XUT0372	TRUE	0.976488	0.00952311	unchanged	1.92264	4.95171e-08	up	1.8898	8.84403e-08	up	2.1683	2.09514e-06	up	2.16781	1.24227e-06	up
XUT0373	TRUE	1.00477	0.102418	unchanged	1.575	0.00625596	up	1.47629	0.0109922	up	1.38495	0.0881739	unchanged	1.10465	0.168125	unchanged
XUT0374	TRUE	1.36	0.0271314	up	2.15241	0.000193526	up	1.97201	0.000721219	up	2.00713	0.0257488	up	1.99465	0.0230181	up
XUT0376	TRUE	3.77506	3.11637e-47	up	3.27992	2.62953e-34	up	4.38009	3.24003e-63	up	3.19878	1.42431e-17	up	4.84719	4.37736e-42	up
XUT0377	TRUE	2.47675	1.45798e-05	up	2.14514	0.000210492	up	3.35767	8.07112e-10	up	2.45328	0.000182852	up	3.63167	2.70044e-09	up
XUT0378	TRUE	2.00392	0.00585558	up	2.61566	0.000162205	up	3.08093	5.79532e-06	up	1.64696	0.0732078	unchanged	2.21304	0.0103273	up
XUT0380	FALSE	0.828293	0.0210818	unchanged	1.61467	1.62977e-06	up	2.12468	1.18738e-10	up	1.96809	2.45692e-06	up	2.1158	1.95863e-07	up
XUT0381	FALSE	0.949954	0.174082	unchanged	2.3412	0.000163125	up	2.97996	8.26875e-07	up	2.38516	0.00189246	up	2.40957	0.00127986	up
XUT0383	TRUE	0.478216	NA	NA	0.822945	0.822599	unchanged	1.27827	0.716872	unchanged	2.49346	0.474504	unchanged	2.95379	0.365037	unchanged
XUT0384	TRUE	2.55776	1.73415e-09	up	3.13282	6.51414e-14	up	3.50174	1.9058e-17	up	3.26553	2.90427e-07	up	4.61657	2.23281e-14	up
XUT0385	FALSE	0.252763	0.703808	unchanged	1.42652	0.00905997	up	1.05048	0.0608086	unchanged	2.89843	0.000394997	up	3.01559	0.000158731	up
XUT0386	TRUE	2.12565	0.0176508	up	3.25506	9.08704e-05	up	3.45197	2.9012e-05	up	3.98883	0.00334841	up	4.86767	0.000207697	up
XUT0387	FALSE	0.524275	0.256048	unchanged	1.16178	0.00565413	up	1.06153	0.0121868	up	1.40562	0.0156538	up	1.60675	0.00392154	up
XUT0388	TRUE	3.36014	5.34349e-07	up	3.80044	6.14678e-09	up	4.59113	7.05239e-13	up	2.90211	7.12237e-05	up	3.15176	8.7732e-06	up
XUT0389	FALSE	1.09214	0.525392	unchanged	2.83478	0.04787	up	3.42936	0.0146756	up	5.78472	0.00268779	up	5.48696	0.00407187	up
XUT0390	TRUE	3.09131	1.7345e-28	up	2.68109	6.365e-21	up	3.52939	8.98755e-37	up	2.98134	5.57612e-17	up	3.48387	6.65575e-24	up
XUT0391	TRUE	2.63624	0.01138	up	3.50927	0.000332965	up	4.24624	9.34202e-06	up	4.09718	0.000322377	up	4.42731	7.08571e-05	up
XUT0392	TRUE	1.77378	0.000307092	up	3.27921	6.84837e-13	up	3.19695	2.67559e-12	up	3.19294	4.46789e-08	up	3.8089	1.48297e-11	up
XUT0393	TRUE	1.92404	0.0237892	up	2.84256	0.000354337	up	3.7354	1.21917e-06	up	3.94052	0.00291003	up	5.05393	6.98127e-05	up
XUT0394	TRUE	2.42026	1.01895e-07	up	3.04657	7.04684e-12	up	3.71717	1.09599e-17	up	3.7366	1.15614e-10	up	3.91136	6.33514e-12	up
XUT0395	FALSE	1.13124	0.000637697	up	0.980959	0.00314103	unchanged	1.71565	6.86011e-08	up	0.890841	0.0508396	unchanged	1.61372	0.000127578	up
XUT0396	TRUE	1.5048	8.95544e-07	up	1.87655	4.6622e-10	up	2.05139	6.54047e-12	up	2.08426	2.36846e-07	up	2.23918	1.1623e-08	up
XUT0397	TRUE	1.96803	1.46094e-10	up	1.66277	1.18575e-07	up	2.37937	4.56137e-15	up	2.26376	4.47254e-11	up	2.64158	1.912e-15	up
XUT0398	FALSE	0.151253	0.857615	unchanged	2.95127	1.03843e-06	up	2.52031	4.1722e-05	up	3.19066	3.85297e-05	up	3.20948	2.47744e-05	up
XUT0399	FALSE	0.243432	0.847712	unchanged	2.13379	0.0262576	up	2.39053	0.0120203	up	0.488843	0.840409	unchanged	1.32545	0.52955	unchanged
XUT0400	TRUE	0.979007	0.400637	unchanged	4.15106	7.71866e-06	up	3.38822	0.000358017	up	5.45142	0.00619008	up	5.85158	0.00259827	up
XUT0401	FALSE	1.3329	0.0231277	up	2.33747	1.86217e-05	up	2.27179	3.37016e-05	up	2.60301	0.000569817	up	2.6746	0.000279141	up
XUT0402	FALSE	1.72717	0.0768238	unchanged	3.10415	0.000455845	up	2.94708	0.000944858	up	1.04017	0.39304	unchanged	2.19517	0.0429843	up
XUT0403	TRUE	2.31973	0.0140288	up	3.64529	2.91911e-05	up	3.27087	0.000213413	up	3.50651	0.0139866	up	4.23509	0.00201156	up
XUT0404	FALSE	-0.127817	0.869336	unchanged	2.75273	5.34581e-07	up	2.33065	3.06445e-05	up	4.51205	5.98411e-11	up	3.70543	9.53444e-08	up
XUT0405	TRUE	0.937598	0.191948	unchanged	2.25015	0.00043329	up	1.71391	0.00927128	up	2.96826	0.000911401	up	2.58166	0.00368092	up
XUT0406	TRUE	3.48303	0.0163937	up	3.28484	0.0194371	up	4.37389	0.00126234	up	4.7985	0.0161943	up	5.99376	0.00156422	up
XUT0407	TRUE	2.39445	0.000876952	up	2.88119	3.22072e-05	up	3.24456	1.98481e-06	up	2.6248	0.0208022	up	3.76779	0.000394621	up
XUT0408	TRUE	2.08019	4.87657e-14	up	2.29141	1.47422e-16	up	2.90058	1.04968e-26	up	2.2025	7.25449e-11	up	2.74956	2.83005e-17	up
XUT0409	TRUE	3.1825	7.34919e-09	up	3.49594	1.23301e-10	up	3.72355	4.554e-12	up	2.43569	0.0003584	up	2.30648	0.000585197	up
XUT0410	TRUE	2.70558	8.70289e-07	up	2.48491	7.33371e-06	up	3.61065	8.55251e-12	up	2.63546	8.03125e-05	up	2.97038	4.09928e-06	up
XUT0411	TRUE	1.48734	0.00285525	up	1.96867	4.1349e-05	up	2.54414	5.20456e-08	up	2.22059	0.000775956	up	2.33672	0.000268759	up
XUT0412	FALSE	0.369838	0.397015	unchanged	0.958094	0.0144429	unchanged	1.30087	0.000719602	up	1.1455	0.022608	up	1.6395	0.000505129	up
XUT0414	TRUE	1.82401	8.96958e-05	up	3.0519	3.38546e-12	up	3.19856	2.0762e-13	up	2.53719	3.57178e-05	up	3.45267	2.72385e-09	up
XUT0415	TRUE	2.74221	0.00706663	up	4.67508	4.91674e-07	up	4.92343	9.79527e-08	up	3.40422	0.000433564	up	3.71435	7.91779e-05	up
XUT0416	TRUE	4.14466	5.12128e-05	up	5.85784	1.16598e-09	up	5.6763	3.65998e-09	up	4.12893	1.27298e-05	up	4.52365	1.00978e-06	up
XUT0417	TRUE	2.41972	2.13827e-06	up	4.30561	1.81437e-19	up	4.54127	8.37802e-22	up	4.18871	2.95272e-10	up	4.79912	1.51253e-13	up
XUT0418	TRUE	3.06756	7.0633e-14	up	3.13994	2.64543e-14	up	3.89649	2.95902e-22	up	3.47011	5.6231e-09	up	4.47551	5.0213e-15	up
XUT0419	TRUE	1.06441	0.0434582	up	1.13135	0.0267938	up	1.38781	0.00593752	up	1.93764	0.000519429	up	1.63349	0.00308827	up
XUT0420	TRUE	0.978035	0.000165173	unchanged	3.10551	4.5616e-39	up	2.76882	3.66812e-31	up	2.98421	3.99544e-19	up	3.21915	7.39301e-23	up
XUT0423	TRUE	1.29441	0.0400768	up	2.48338	1.8437e-05	up	2.7067	2.44137e-06	up	1.85572	0.0577225	unchanged	2.50414	0.00654126	up
XUT0425	TRUE	1.56065	0.048806	up	3.61415	2.67015e-07	up	3.5645	3.9873e-07	up	3.68246	0.000295035	up	4.00989	5.25777e-05	up
XUT0427	TRUE	6.19004	0.000381576	up	6.75151	4.66086e-05	up	7.36276	7.26543e-06	up	6.48513	0.000228629	up	6.78664	9.06768e-05	up
XUT0428	TRUE	1.06004	0.0971129	unchanged	2.60531	4.99289e-06	up	2.91109	2.41817e-07	up	2.51761	0.00171729	up	3.23142	2.23279e-05	up
XUT0429	TRUE	4.25242	0.00862001	up	6.47642	1.38186e-05	up	6.90835	3.09611e-06	up	6.27338	5.86922e-05	up	6.31967	4.53683e-05	up
XUT0430	TRUE	2.34027	6.376e-32	up	2.73026	3.53817e-42	up	3.22484	7.13865e-60	up	3.693	4.15834e-50	up	3.88113	1.11928e-56	up
XUT0431	FALSE	0.565754	0.41957	unchanged	3.28764	4.39331e-09	up	2.95666	1.80703e-07	up	3.26908	4.92576e-05	up	3.31729	2.67635e-05	up
XUT0433	TRUE	2.19656	4.25134e-13	up	1.98936	1.24494e-10	up	2.79682	8.33384e-21	up	1.88346	1.90273e-06	up	2.93267	2.16511e-15	up
XUT0434	TRUE	1.37671	0.00913297	up	2.5815	1.34578e-07	up	2.51851	2.90524e-07	up	2.34233	0.000286555	up	2.86248	3.52236e-06	up
XUT0436	FALSE	-0.0808418	0.930958	unchanged	2.31204	0.000388082	up	1.7762	0.00804338	up	2.5148	0.00250409	up	2.37946	0.00357909	up
XUT0437	FALSE	0.430799	0.511464	unchanged	0.944233	0.107091	unchanged	1.73032	0.00199238	up	1.49155	0.134509	unchanged	1.26919	0.194744	unchanged
XUT0438	TRUE	1.17078	0.261692	unchanged	1.57789	0.101876	unchanged	2.2954	0.013595	up	1.86801	0.0902752	unchanged	2.34071	0.0252315	up
XUT0439	TRUE	2.60374	1.69648e-13	up	3.12583	4.8322e-19	up	3.78612	2.81483e-28	up	4.09516	3.23859e-18	up	4.57469	3.93031e-23	up
XUT0440	TRUE	1.72107	0.000311307	up	2.04285	1.11239e-05	up	2.45682	7.13244e-08	up	2.75535	2.07105e-06	up	2.52757	1.06053e-05	up
XUT0441	TRUE	0.281146	0.774843	unchanged	1.75225	0.0242693	up	2.35091	0.00188752	up	3.03062	0.00613993	up	3.68922	0.000495849	up
XUT0442	TRUE	4.10242	0.00184219	up	5.08067	4.15475e-05	up	5.16679	2.89449e-05	up	3.58796	0.000653511	up	3.87556	0.000159207	up
XUT0443	FALSE	1.12166	0.320293	unchanged	2.52539	0.0102696	up	1.85083	0.0694491	unchanged	1.00723	0.416819	unchanged	1.62463	0.155846	unchanged
XUT0444	FALSE	-0.0304246	0.976964	unchanged	1.8984	0.00702456	up	2.07419	0.00301023	up	2.07651	0.0461665	up	2.45527	0.0135047	up
XUT0445	TRUE	2.46691	0.0442324	up	2.49494	0.0352503	up	3.36462	0.00320604	up	1.08491	0.47967	unchanged	2.72182	0.0400936	up
XUT0446	TRUE	2.58534	0.114462	unchanged	2.94965	0.0540959	unchanged	3.2469	0.0324953	up	3.47024	0.158345	unchanged	4.95556	0.0269953	up
XUT0447	TRUE	5.06528	0.00230571	up	5.02303	0.00155558	up	5.62601	0.000336646	up	2.70287	0.0829499	unchanged	4.37078	0.00235528	up
XUT0448	FALSE	4.00221	NA	NA	4.49612	0.0445323	up	4.7224	0.0338442	up	4.04455	0.0826093	unchanged	4.99546	0.0228626	up
XUT0449	TRUE	1.8605	3.73571e-11	up	2.10392	7.05241e-14	up	2.73199	2.43213e-23	up	0.979573	0.0129047	unchanged	2.02159	2.16325e-08	up
XUT0450	TRUE	1.71757	0.00244669	up	1.84175	0.000904453	up	2.44953	5.38357e-06	up	2.52577	0.000403271	up	3.0263	9.56392e-06	up
XUT0451	TRUE	0.524722	0.456239	unchanged	1.54787	0.0116079	up	1.9712	0.0010292	up	1.61653	0.0509957	unchanged	2.38198	0.002053	up
XUT0452	TRUE	2.04117	6.75085e-05	up	2.20971	1.19341e-05	up	2.86467	4.78861e-09	up	3.36921	4.58246e-06	up	3.88277	4.84482e-08	up
XUT0453	TRUE	1.787	0.00283477	up	2.91514	1.90904e-07	up	3.46397	2.76574e-10	up	2.71942	5.71921e-05	up	3.12745	1.70257e-06	up
XUT0454	TRUE	2.30427	0.00730563	up	2.83401	0.000541354	up	3.19794	7.49389e-05	up	5.21429	1.88876e-05	up	4.83229	6.93305e-05	up
XUT0455	TRUE	3.2423	1.2423e-23	up	3.40727	1.97329e-25	up	4.22131	6.68657e-40	up	3.00679	1.01062e-11	up	3.94132	1.35379e-20	up
XUT0456	TRUE	0.0901029	0.922453	unchanged	0.994634	0.164385	unchanged	1.2323	0.0811477	unchanged	1.05429	0.275298	unchanged	1.54294	0.087321	unchanged
XUT0457	TRUE	0.994678	0.186547	unchanged	2.19774	0.00111595	up	1.84238	0.00741154	up	2.89804	0.00502324	up	3.14087	0.00168904	up
XUT0458	TRUE	3.24375	6.70275e-22	up	3.23075	2.87819e-21	up	3.96627	1.48307e-32	up	3.27439	8.11573e-13	up	4.42809	5.65209e-24	up
XUT0459	TRUE	0	NA	NA	0	1	unchanged	2.29266	0.658984	unchanged	NA	NA	NA	NA	NA	NA
XUT0460	TRUE	3.15638	0.000539867	up	2.29488	0.0130713	up	3.33748	0.000151453	up	2.41451	0.0605	unchanged	4.2784	0.000255539	up
XUT0461	TRUE	3.52023	0.00104588	up	3.11316	0.00329414	up	4.49074	9.10074e-06	up	3.34623	0.0605633	unchanged	5.90468	0.000307422	up
XUT0462	FALSE	1.86737	0.00493672	up	1.71317	0.0089181	up	2.42909	0.000124074	up	2.5655	0.0162169	up	1.51538	0.167853	unchanged
XUT0463	TRUE	1.28797	2.98802e-06	up	1.48626	4.71383e-08	up	1.98518	8.86713e-14	up	2.34094	8.88445e-11	up	2.15897	1.45085e-09	up
XUT0464	TRUE	NA	NA	NA	NA	NA	NA	NA	NA	NA	NA	NA	NA	NA	NA	NA
XUT0466	TRUE	1.29554	1.82631e-10	up	1.85508	1.61959e-20	up	2.36337	3.37034e-33	up	1.56493	5.33319e-10	up	1.97425	6.51088e-16	up
XUT0467	TRUE	1.61356	5.8241e-26	up	2.26054	3.63663e-50	up	2.81755	5.01434e-78	up	2.06033	2.92844e-30	up	2.71679	6.77566e-52	up
XUT0468	TRUE	3.40692	5.81953e-28	up	2.6077	5.79384e-16	up	4.35221	1.56233e-45	up	2.62959	2.60847e-12	up	3.60621	7.69733e-24	up
XUT0469	TRUE	3.63861	3.02095e-34	up	3.34002	5.89837e-28	up	4.38864	1.43278e-49	up	2.8401	3.68317e-14	up	3.94559	3.71314e-28	up
XUT0470	TRUE	3.77747	9.46407e-06	up	3.85691	3.72357e-06	up	5.08207	3.23885e-10	up	3.23939	0.000742983	up	4.08285	8.75633e-06	up
XUT0471	TRUE	2.98044	6.14364e-37	up	2.66395	1.39177e-28	up	3.50603	1.66355e-50	up	2.88009	1.89188e-23	up	3.76999	1.70216e-41	up
XUT0472	FALSE	1.30302	NA	NA	2.13129	0.509968	unchanged	1.62343	0.621967	unchanged	-0.58839	0.921903	unchanged	-1.11186	0.838737	unchanged
XUT0473	FALSE	-0.490717	NA	NA	0.979997	0.68747	unchanged	0.36148	0.888995	unchanged	-0.588405	0.921903	unchanged	0.478978	0.931457	unchanged
XUT0474	TRUE	3.21886	2.82691e-15	up	3.58854	1.10519e-18	up	4.62221	1.4505e-31	up	4.95115	6.4727e-16	up	5.53566	4.66449e-20	up
XUT0475	TRUE	5.05814	2.21221e-05	up	5.51466	1.41521e-06	up	6.5713	5.47098e-09	up	7.64455	1.51369e-06	up	8.19052	1.92928e-07	up
XUT0476	TRUE	3.31115	1.37883e-10	up	3.74175	1.99857e-13	up	4.09247	4.09186e-16	up	2.85102	2.08472e-05	up	3.6507	1.08807e-08	up
XUT0477	FALSE	0.468719	0.44181	unchanged	2.06397	6.4129e-05	up	2.07245	6.05788e-05	up	2.33286	0.00163783	up	2.14827	0.00318947	up
XUT0478	TRUE	1.23402	0.0941637	unchanged	1.60671	0.0214861	up	1.79607	0.0094999	up	2.18359	0.0475655	up	2.25529	0.034436	up
XUT0479	TRUE	2.98433	6.67821e-13	up	3.98324	1.0949e-22	up	4.23858	6.23741e-26	up	4.3641	1.54077e-14	up	4.84667	3.99753e-18	up
XUT0480	FALSE	0.881353	0.00400001	unchanged	1.92781	1.64443e-11	up	1.87702	5.95472e-11	up	1.99985	6.37035e-07	up	2.57472	2.11351e-11	up
XUT0481	FALSE	0.377046	0.572842	unchanged	1.96639	0.000391791	up	1.56358	0.00587019	up	1.50838	0.0543995	unchanged	1.67598	0.0261347	up
XUT0482	FALSE	2.05733	0.0285092	up	2.32103	0.00997463	up	2.46925	0.0058153	up	0.825843	0.57174	unchanged	1.80201	0.16675	unchanged
XUT0484	TRUE	2.41027	0.000465143	up	2.89366	1.26896e-05	up	3.13895	1.74003e-06	up	0.72099	0.39902	unchanged	1.80218	0.0176601	up
XUT0486	FALSE	1.77861	0.00913284	up	2.23342	0.000633627	up	2.61752	4.64449e-05	up	1.77282	0.0464601	up	2.50573	0.0026584	up
XUT0487	TRUE	3.5933	0.00880703	up	4.12267	0.00149065	up	4.97676	9.30029e-05	up	6.17369	0.000439298	up	6.71614	9.42167e-05	up
XUT0488	TRUE	2.6997	1.01038e-42	up	2.8452	3.53719e-46	up	3.352	3.9876e-65	up	3.08027	5.30641e-40	up	3.66535	9.23659e-59	up
XUT0489	TRUE	2.10666	0.000126505	up	3.64632	1.0111e-12	up	4.01798	1.82194e-15	up	3.03991	7.12199e-06	up	3.66227	1.99159e-08	up
XUT0490	FALSE	1.10737	0.126609	unchanged	2.85247	7.94245e-06	up	2.78883	1.32823e-05	up	3.00543	0.00129357	up	3.34975	0.000213579	up
XUT0491	TRUE	2.99762	8.88251e-30	up	3.14589	7.47906e-32	up	3.67636	2.62318e-44	up	3.55287	1.24447e-22	up	4.35516	5.02704e-35	up
XUT0492	TRUE	1.01594	0.000342947	up	1.49186	5.16286e-08	up	1.67838	6.43782e-10	up	1.69761	1.25598e-06	up	1.91558	1.53033e-08	up
XUT0493	FALSE	0	1	unchanged	6.20954	0.000859463	up	6.12877	0.00101888	up	2.0056	0.4199	unchanged	3.90687	0.0787004	unchanged
XUT0494	TRUE	2.8182	2.8057e-17	up	3.40883	7.55009e-25	up	3.85911	3.32141e-32	up	3.38754	4.19273e-15	up	4.50176	1.89533e-27	up
XUT0495	TRUE	4.86981	8.59069e-05	up	6.03337	2.77635e-07	up	6.19099	1.20241e-07	up	3.50055	0.00203233	up	4.80429	8.05132e-06	up
XUT0496	TRUE	2.9995	0.0004691	up	3.68393	6.79889e-06	up	3.97806	9.17168e-07	up	7.06458	1.67045e-05	up	7.57895	2.8538e-06	up
XUT0497	TRUE	1.67565	0.000364676	up	2.39229	1.08312e-07	up	2.79599	2.58641e-10	up	2.02081	0.000976386	up	2.60605	7.36401e-06	up
XUT0498	TRUE	1.80043	0.00225679	up	2.01358	0.000447828	up	2.39421	2.13384e-05	up	2.06452	0.0130252	up	2.74381	0.000455895	up
XUT0499	FALSE	1.32862	8.66789e-05	up	3.9808	5.80678e-39	up	4.27392	1.65758e-45	up	4.00836	7.9858e-28	up	4.08242	1.85168e-29	up
XUT0500	FALSE	2.39251	0.332258	unchanged	5.68557	0.0038622	up	5.50972	0.00533979	up	1.87454	0.442585	unchanged	1.76823	0.459436	unchanged
XUT0501	FALSE	1.171	0.00516504	up	3.09312	2.42364e-16	up	3.11267	1.35769e-16	up	3.2089	2.49043e-11	up	3.17221	2.32738e-11	up
XUT0502	TRUE	2.42857	1.74854e-10	up	2.42239	2.91249e-10	up	3.36187	1.03828e-19	up	2.85731	1.84295e-07	up	3.34691	2.50247e-10	up
XUT0503	TRUE	2.74096	1.10061e-05	up	2.57306	3.65575e-05	up	3.41252	1.32775e-08	up	4.1756	0.00161244	up	4.38593	0.000726481	up
XUT0504	TRUE	3.28729	0.00181373	up	3.62408	0.000334023	up	3.60989	0.000352903	up	5.37091	0.000948469	up	5.78623	0.000296207	up
XUT0505	TRUE	2.58574	1.29681e-10	up	5.06247	1.85718e-40	up	5.32161	2.9446e-45	up	4.00861	4.59344e-11	up	5.20991	1.01752e-18	up
XUT0506	TRUE	3.24297	1.99922e-08	up	3.65687	1.19403e-10	up	4.17935	7.10467e-14	up	4.30366	1.20222e-06	up	5.32062	5.87954e-10	up
XUT0507	TRUE	NA	NA	NA	NA	NA	NA	NA	NA	NA	NA	NA	NA	NA	NA	NA
XUT0510	TRUE	1.60366	0.0308357	up	2.44053	0.000454249	up	3.33821	6.74734e-07	up	2.77753	0.00310106	up	3.31021	0.000233024	up
XUT0511	TRUE	2.93022	0.000353204	up	2.98393	0.000191158	up	3.68929	2.26574e-06	up	4.13752	0.000268705	up	3.75659	0.000883013	up
XUT0512	TRUE	2.92145	1.14187e-15	up	2.5358	1.33184e-11	up	3.53547	9.79446e-23	up	3.37688	1.52119e-10	up	4.13687	4.84326e-16	up
XUT0513	FALSE	0.951121	0.260047	unchanged	2.9787	3.38599e-05	up	2.60285	0.000362847	up	4.7349	0.000340118	up	4.56716	0.000488325	up
XUT0514	TRUE	0.833729	0.540535	unchanged	4.1585	7.91451e-05	up	3.17662	0.00346365	up	5.29983	0.0020278	up	4.6287	0.00699057	up
XUT0515	FALSE	1.83147	0.00385458	up	3.68645	1.53259e-10	up	3.63492	2.74465e-10	up	3.3734	8.77456e-06	up	3.70629	5.33894e-07	up
XUT0516	FALSE	0.78603	0.27618	unchanged	2.27439	0.000294683	up	1.88391	0.00330718	up	1.84598	0.0472572	up	2.48251	0.00458283	up
XUT0517	TRUE	2.0593	0.000189123	up	2.75284	1.9594e-07	up	3.15885	1.26756e-09	up	1.61289	0.0762939	unchanged	3.22365	6.47916e-05	up
XUT0518	TRUE	1.96774	0.013224	up	2.8831	0.000108222	up	3.03303	4.14954e-05	up	3.03866	0.0329555	up	4.5822	0.000557211	up
XUT0519	TRUE	3.44561	0.012674	up	5.31633	2.8298e-05	up	4.75449	0.000206566	up	2.85006	0.00382988	up	2.9467	0.0021907	up
XUT0520	TRUE	1.67081	0.0767789	unchanged	3.26027	0.000123961	up	3.13925	0.000233909	up	2.93057	0.0223332	up	3.63432	0.00296005	up
XUT0521	TRUE	1.183	9.89784e-06	up	2.41047	2.1025e-21	up	2.33192	4.16656e-20	up	3.29817	2.67433e-27	up	3.16739	7.79926e-26	up
XUT0522	TRUE	1.46583	0.102935	unchanged	2.84934	0.00044384	up	3.25993	4.55178e-05	up	2.75224	0.0186028	up	3.49774	0.00168613	up
XUT0523	TRUE	0.515161	0.497996	unchanged	2.67867	1.46068e-05	up	2.5675	3.56122e-05	up	1.93115	0.0525518	unchanged	1.92673	0.0464033	up
XUT0524	TRUE	2.56359	4.61245e-10	up	3.15485	6.42664e-15	up	3.92597	3.1284e-23	up	2.81336	1.38416e-07	up	3.23371	4.48118e-10	up
XUT0525	FALSE	0.616088	0.255766	unchanged	1.8089	0.00016278	up	1.76884	0.000236847	up	1.57582	0.0143971	up	1.36836	0.0304341	up
XUT0526	FALSE	0.292104	0.689406	unchanged	2.61934	3.64982e-06	up	2.48659	1.24214e-05	up	2.51374	0.00064869	up	1.96799	0.00762907	up
XUT0527	TRUE	2.65414	2.94732e-19	up	2.51331	7.92016e-17	up	3.56402	2.18973e-34	up	2.59008	3.68529e-12	up	3.16316	1.30591e-18	up
XUT0530	TRUE	3.13719	0.000108554	up	3.3405	2.28802e-05	up	4.04455	1.48799e-07	up	2.21346	0.0595207	unchanged	3.56822	0.00090658	up
XUT0531	TRUE	1.98101	0.000204755	up	1.6994	0.00149024	up	2.42502	2.51605e-06	up	1.37492	0.0577544	unchanged	1.62397	0.0184997	up
XUT0532	TRUE	2.23367	0.0233655	up	4.01089	7.00476e-06	up	4.62497	1.40597e-07	up	2.50042	0.00870464	up	3.1192	0.000597841	up
XUT0533	TRUE	1.78119	0.00111627	up	2.76654	7.82909e-08	up	2.84159	3.16698e-08	up	3.30989	1.62352e-07	up	3.70798	1.61391e-09	up
XUT0534	TRUE	3.64954	0.0376936	up	4.76777	0.00336731	up	5.71548	0.000346584	up	5.65405	0.00495915	up	5.84699	0.00307467	up
XUT0535	TRUE	1.02563	0.043866	up	2.36631	3.38678e-07	up	2.2694	1.12075e-06	up	2.38629	0.000333159	up	2.68753	2.74726e-05	up
XUT0536	TRUE	1.15622	0.0498266	up	1.25283	0.0285269	up	1.81429	0.00106572	up	2.06797	0.00761666	up	2.60256	0.000399455	up
XUT0537	TRUE	6.98359	3.20436e-05	up	6.96313	1.62716e-05	up	7.72484	1.32037e-06	up	3.89455	0.00619371	up	3.88232	0.00544796	up
XUT0538	TRUE	1.23072	0.128645	unchanged	1.92731	0.0101562	up	2.56697	0.000435439	up	2.23918	0.0200395	up	2.40247	0.0100701	up
XUT0539	TRUE	1.72394	0.000158943	up	2.86662	2.67935e-11	up	3.14815	1.42808e-13	up	2.671	1.47577e-07	up	2.82179	1.27679e-08	up
XUT0540	FALSE	1.61181	0.0143674	up	2.18955	0.000477322	up	2.66727	1.3699e-05	up	3.19841	4.26732e-05	up	2.7334	0.000459081	up
XUT0541	TRUE	2.08594	1.78263e-19	up	2.23916	7.81024e-22	up	2.85804	6.90235e-36	up	2.90381	8.98408e-29	up	3.3378	2.72886e-39	up
XUT0542	TRUE	2.44491	0.00442381	up	3.06881	0.00017312	up	3.18641	8.95135e-05	up	2.24204	0.0672556	unchanged	3.27306	0.00399629	up
XUT0543	TRUE	1.58603	0.00445365	up	2.5881	7.555e-07	up	2.63536	4.46656e-07	up	3.5114	3.88531e-08	up	3.67186	4.56952e-09	up
XUT0544	FALSE	-0.215799	0.850884	unchanged	1.76399	0.0419051	up	1.3172	0.140057	unchanged	1.77129	0.134717	unchanged	2.19847	0.050238	unchanged
XUT0549	TRUE	1.47915	0.0145517	up	2.42692	1.82438e-05	up	2.31825	4.66191e-05	up	1.9959	0.0195297	up	1.91758	0.0217955	up
XUT0550	TRUE	2.24604	0.00218875	up	3.56115	1.76699e-07	up	4.17114	4.52535e-10	up	4.44044	2.09514e-06	up	4.24283	4.90726e-06	up
XUT0551	FALSE	1.69854	0.00288104	up	3.18984	1.27188e-09	up	3.21723	8.55875e-10	up	2.9489	1.19966e-05	up	3.49217	7.6111e-08	up
XUT0552	TRUE	1.16253	0.00672442	up	2.59126	4.72869e-11	up	2.35805	3.00147e-09	up	2.35201	4.60109e-05	up	3.47406	1.31349e-10	up
XUT0553	TRUE	2.08414	0.00254674	up	1.99358	0.00346411	up	3.04299	2.82845e-06	up	1.04574	0.267453	unchanged	2.71623	0.000876743	up
XUT0554	TRUE	4.68954	0.00872939	up	6.96833	1.93447e-05	up	7.91968	8.76562e-07	up	2.88851	0.0147827	up	3.22297	0.00485614	up
XUT0555	TRUE	4.03624	0.00269811	up	4.34487	0.000712896	up	5.3591	1.9792e-05	up	3.5005	0.013871	up	4.13417	0.00253885	up
XUT0556	TRUE	2.50419	0.00213653	up	3.01209	0.000114837	up	3.08949	7.20097e-05	up	2.34873	0.0508808	unchanged	3.14213	0.00539719	up
XUT0557	TRUE	2.5591	0.000130099	up	2.1478	0.0012606	up	3.3712	1.16945e-07	up	1.937	0.0188247	up	3.16408	2.89931e-05	up
XUT0558	TRUE	3.13196	5.05393e-13	up	2.40134	9.631e-08	up	3.59378	4.61944e-17	up	1.91895	0.000309832	up	2.70723	5.35505e-08	up
XUT0559	TRUE	3.41414	8.22088e-07	up	2.25742	0.00180907	up	3.61857	9.11854e-08	up	2.61746	0.00196685	up	2.65692	0.0012479	up
XUT0560	TRUE	3.0042	4.98174e-05	up	2.12005	0.00538889	up	3.20128	8.81881e-06	up	3.66827	0.00514524	up	5.1104	3.82791e-05	up
XUT0561	TRUE	3.00081	0.00189144	up	2.54616	0.00788196	up	3.15362	0.000716441	up	2.49544	0.0365165	up	2.74032	0.0169214	up
XUT0562	TRUE	2.22735	NA	NA	3.13795	0.137111	unchanged	3.59228	0.0839356	unchanged	1.22483	0.671348	unchanged	-0.261798	0.933696	unchanged
XUT0563	FALSE	1.93285	0.126995	unchanged	3.09514	0.00708163	up	2.85334	0.0141057	up	1.83888	0.223295	unchanged	1.2561	0.408294	unchanged
XUT0564	TRUE	3.21404	0.0251557	up	4.88721	0.000203377	up	4.30578	0.00122197	up	3.10454	0.0472963	up	3.48471	0.0208051	up
XUT0565	FALSE	0.785654	0.286282	unchanged	1.61339	0.0150457	up	2.37544	0.000201549	up	1.72998	0.0749208	unchanged	1.58378	0.0951406	unchanged
XUT0566	TRUE	3.09691	4.29907e-29	up	3.12965	5.22589e-29	up	4.02055	8.37592e-49	up	3.61073	4.64694e-26	up	4.22314	1.57343e-36	up
XUT0567	TRUE	2.60485	9.36308e-26	up	2.23926	1.91027e-18	up	3.13959	8.15714e-37	up	2.72972	7.603e-16	up	3.65221	2.04754e-29	up
XUT0568	TRUE	0.959121	0.0880754	unchanged	1.22226	0.0224697	up	1.41431	0.0077176	up	1.18467	0.11377	unchanged	1.26892	0.0774988	unchanged
XUT0569	FALSE	1.71831	0.0258186	up	2.29664	0.00169342	up	3.07288	1.4147e-05	up	2.68741	0.00357651	up	3.00384	0.000744177	up
XUT0570	TRUE	2.42976	0.0716877	unchanged	3.01255	0.0172308	up	3.72427	0.00251961	up	3.33328	0.0881064	unchanged	4.77876	0.00933577	up
XUT0571	TRUE	3.63723	0.0034295	up	2.43408	0.0556481	unchanged	4.36817	0.000195809	up	2.83889	0.0660955	unchanged	3.637	0.0128188	up
XUT0572	TRUE	2.46841	7.49238e-10	up	2.47192	1.08438e-09	up	3.74294	3.07111e-22	up	2.76026	2.39586e-06	up	4.00186	3.65733e-13	up
XUT0573	FALSE	0.224414	0.857795	unchanged	1.61301	0.0993372	unchanged	1.21018	0.230201	unchanged	2.04434	0.121323	unchanged	1.53327	0.244865	unchanged
XUT0574	TRUE	1.4319	4.59455e-05	up	2.7842	3.2158e-17	up	2.91871	5.82823e-19	up	2.86788	1.58456e-11	up	3.3202	8.44694e-16	up
XUT0575	TRUE	2.9477	5.59671e-25	up	3.1796	2.25937e-28	up	3.8545	2.07525e-42	up	3.47702	5.71703e-27	up	4.11818	4.92505e-39	up
XUT0576	FALSE	-0.144131	0.679776	unchanged	1.81291	6.79449e-11	up	1.02522	0.000393513	up	2.22787	5.13977e-09	up	2.15689	9.10368e-09	up
XUT0577	TRUE	1.55721	0.0516465	unchanged	2.73164	0.000202345	up	2.45452	0.000979302	up	2.06502	0.0603956	unchanged	2.71404	0.00886156	up
XUT0578	FALSE	1.02386	0.121235	unchanged	2.14777	0.000342831	up	2.05622	0.000652558	up	2.10215	0.00348079	up	2.17263	0.00184883	up
XUT0579	TRUE	1.01323	0.037983	up	2.29812	2.708e-07	up	2.2637	4.28629e-07	up	1.66025	0.0183148	up	2.59709	7.57143e-05	up
XUT0580	TRUE	1.64927	7.72379e-11	up	2.23043	4.98697e-19	up	2.658	3.86403e-27	up	2.67611	2.68892e-18	up	3.13405	7.16626e-26	up
XUT0581	TRUE	0.177529	0.906986	unchanged	1.50936	0.192397	unchanged	1.3554	0.248504	unchanged	3.86667	0.0422373	up	4.30035	0.0197628	up
XUT0582	TRUE	2.14423	0.0579625	unchanged	3.85093	0.000158398	up	3.61863	0.000423726	up	2.90986	0.0576772	unchanged	4.38893	0.00213137	up
XUT0583	TRUE	1.04773	0.10348	unchanged	2.45299	2.24798e-05	up	2.18891	0.0001892	up	2.17687	0.00470374	up	2.2587	0.00254725	up
XUT0584	TRUE	2.13735	6.09038e-05	up	3.13251	6.43206e-10	up	3.59364	5.59738e-13	up	3.43984	1.13056e-06	up	4.04643	3.41325e-09	up
XUT0585	TRUE	2.98766	0.00056511	up	3.72108	6.63788e-06	up	4.26132	1.54785e-07	up	3.96954	0.000476379	up	4.28761	0.00011313	up
XUT0586	FALSE	-0.365243	0.527774	unchanged	1.07603	0.0271919	up	0.927902	0.0601209	unchanged	0.544464	0.39054	unchanged	1.33377	0.0214133	up
XUT0587	FALSE	-0.639267	0.631866	unchanged	1.02839	0.346875	unchanged	1.16842	0.283175	unchanged	1.6232	0.273277	unchanged	1.95621	0.163573	unchanged
XUT0588	FALSE	0.973087	0.473429	unchanged	2.69927	0.0180215	up	2.30317	0.048145	up	0.0296726	0.995093	unchanged	0.455178	0.781326	unchanged
XUT0589	FALSE	1.90007	0.277952	unchanged	2.81871	0.073126	unchanged	4.38288	0.00328706	up	5.06862	0.0193994	up	4.58699	0.0334055	up
XUT0590	TRUE	2.79449	0.0172495	up	4.24003	8.73734e-05	up	4.51487	2.56633e-05	up	4.60511	0.00665797	up	5.54354	0.000758745	up
XUT0591	FALSE	0.19555	0.721497	unchanged	1.63187	0.000220834	up	1.39567	0.00184318	up	1.53017	0.0168745	up	1.51646	0.0147611	up
XUT0592	TRUE	2.81552	0.0195715	up	3.94232	0.000433851	up	4.53583	3.8767e-05	up	3.43811	0.0201952	up	3.883	0.00675519	up
XUT0593	FALSE	0.648316	0.550363	unchanged	2.43315	0.00664955	up	2.35442	0.00901833	up	2.98578	0.0117728	up	3.00534	0.00943992	up
XUT0594	TRUE	0.917139	0.245475	unchanged	2.36727	0.000623216	up	2.22621	0.00141015	up	2.84519	0.00582317	up	3.53373	0.000331366	up
XUT0595	TRUE	2.94926	1.37788e-12	up	3.4957	2.08851e-17	up	4.1317	1.4578e-24	up	3.34224	3.66658e-09	up	3.9473	6.33935e-13	up
XUT0596	TRUE	1.53111	0.0236997	up	2.30499	0.000288545	up	2.55505	4.94106e-05	up	2.96623	0.000306698	up	3.1378	8.7436e-05	up
XUT0597	TRUE	2.98432	1.98334e-20	up	3.64479	7.41591e-30	up	4.08028	4.846e-38	up	3.35928	4.05264e-14	up	4.11152	1.23674e-21	up
XUT0598	TRUE	2.25554	3.23735e-14	up	3.25303	7.05199e-29	up	3.78266	1.10203e-39	up	4.49565	1.77399e-32	up	4.84557	1.64095e-38	up
XUT0599	TRUE	2.67042	5.35089e-40	up	2.82364	2.65317e-43	up	3.37515	4.43314e-63	up	2.67946	3.60383e-22	up	3.92437	2.61684e-49	up
XUT0600	FALSE	-0.119467	0.895733	unchanged	1.84739	0.00599169	up	1.02884	0.146201	unchanged	2.13215	0.0447556	up	2.16623	0.0356344	up
XUT0601	TRUE	-0.33576	0.775487	unchanged	1.74559	0.0514995	unchanged	1.64507	0.0690453	unchanged	2.05002	0.0761733	unchanged	1.30344	0.265956	unchanged
XUT0602	TRUE	1.91618	1.66363e-16	up	1.9637	5.26706e-17	up	2.33356	5.85722e-24	up	2.03504	1.08245e-11	up	2.41637	9.92067e-17	up
XUT0603	FALSE	1.1112	0.0430423	up	2.30177	5.01452e-06	up	2.63117	1.20572e-07	up	1.83065	0.00934771	up	2.42975	0.000257087	up
XUT0604	FALSE	0.596837	0.442481	unchanged	1.52183	0.0256308	up	1.76523	0.00889552	up	1.0589	0.338157	unchanged	1.27449	0.223541	unchanged
XUT0605	FALSE	0.303999	0.603555	unchanged	2.34613	6.2156e-07	up	1.99801	2.98196e-05	up	2.13653	0.00319588	up	2.07183	0.00345487	up
XUT0606	FALSE	0.645509	0.689688	unchanged	-0.213383	0.895572	unchanged	0.628719	0.665644	unchanged	0.101648	0.969687	unchanged	0.513643	0.796875	unchanged
XUT0607	TRUE	2.24012	0.0041092	up	2.87954	0.000106731	up	3.8059	1.25297e-07	up	2.54665	0.0119306	up	3.5327	0.000215271	up
XUT0608	TRUE	1.73157	0.0146878	up	2.554	0.000131077	up	2.94148	7.66359e-06	up	2.48719	0.0154523	up	2.85889	0.00373766	up
XUT0609	FALSE	0.827126	0.330707	unchanged	1.82094	0.0158024	up	2.67485	0.000223955	up	2.86099	0.00344192	up	2.85742	0.00278975	up
XUT0610	TRUE	3.53829	2.19539e-11	up	2.87343	1.1312e-07	up	4.09455	2.76649e-15	up	2.56343	0.000225229	up	3.68723	1.48221e-08	up
XUT0611	TRUE	3.52433	7.79756e-37	up	2.78942	3.12965e-22	up	4.02804	1.04721e-47	up	2.32988	5.97733e-12	up	3.44717	7.03274e-27	up
XUT0612	TRUE	3.0996	4.00858e-12	up	2.57134	2.00514e-08	up	3.99593	4.71481e-20	up	2.36434	1.58259e-05	up	2.99963	8.41442e-09	up
XUT0613	TRUE	2.00203	1.28383e-10	up	2.12201	1.2007e-11	up	2.70779	7.14505e-19	up	2.14932	3.55234e-07	up	3.02862	3.25514e-14	up
XUT0614	TRUE	2.61975	1.31007e-06	up	1.88756	0.000715948	up	2.83652	9.42048e-08	up	1.39464	0.0507064	unchanged	2.81921	9.88355e-06	up
XUT0616	TRUE	2.3385	2.11962e-05	up	3.22881	8.65962e-10	up	4.11868	8.73983e-16	up	3.71261	6.83087e-09	up	4.09578	6.04027e-11	up
XUT0617	TRUE	0.248007	0.858317	unchanged	3.18493	0.00127245	up	3.5865	0.000241923	up	3.61427	0.0168143	up	3.49985	0.0186702	up
XUT0618	TRUE	3.41951	4.20093e-21	up	3.52366	5.08522e-22	up	4.20017	9.46313e-32	up	3.28497	1.60893e-12	up	4.15355	1.77002e-20	up
XUT0619	TRUE	2.59184	7.71845e-11	up	3.05292	1.00218e-14	up	3.56521	3.37354e-20	up	3.16596	2.52021e-10	up	3.48804	8.73502e-13	up
XUT0620	FALSE	1.70639	0.0327415	up	2.30917	0.00222954	up	2.1023	0.00594664	up	0.959303	0.320231	unchanged	0.136936	0.893515	unchanged
XUT0621	FALSE	1.25793	0.224667	unchanged	2.30573	0.0131988	up	2.05826	0.0293198	up	3.62802	0.0128666	up	3.74395	0.00863109	up
XUT0622	TRUE	2.11989	0.00189849	up	2.32324	0.000479109	up	3.32462	1.8556e-07	up	1.27112	0.156143	unchanged	2.72899	0.000585587	up
XUT0623	FALSE	0.860158	0.402846	unchanged	1.35539	0.145767	unchanged	1.96923	0.0290355	up	1.67929	0.214279	unchanged	1.72219	0.186962	unchanged
XUT0624	TRUE	1.26883	0.212813	unchanged	2.68244	0.00294858	up	2.98686	0.000833028	up	2.7844	0.011617	up	3.12513	0.0033512	up
XUT0625	TRUE	3.27637	NA	NA	0	1	unchanged	2.92655	0.503749	unchanged	2.45582	0.575929	unchanged	0	1	unchanged
XUT0626	TRUE	2.50404	5.24683e-06	up	2.54223	2.944e-06	up	3.15734	2.67553e-09	up	2.60923	3.37031e-05	up	2.72816	8.5897e-06	up
XUT0627	TRUE	0.205759	0.82744	unchanged	1.97589	0.00608675	up	2.41345	0.000640474	up	2.93388	0.00998396	up	3.26704	0.0029611	up
XUT0628	TRUE	1.34847	0.0226463	up	1.90263	0.000729269	up	2.4585	7.30442e-06	up	1.99354	0.00660327	up	2.5	0.000335358	up
XUT0629	TRUE	0.923322	0.264774	unchanged	2.26369	0.00183937	up	2.59292	0.000296491	up	2.65537	0.0269866	up	3.32139	0.00366845	up
XUT0630	TRUE	1.03477	0.00533478	up	1.57108	9.4936e-06	up	1.30212	0.000304917	up	1.80861	5.55101e-05	up	1.97878	5.07699e-06	up
XUT0631	FALSE	0.440886	0.725941	unchanged	3.16149	0.000905761	up	1.9661	0.0508716	unchanged	3.35793	0.0262352	up	3.57959	0.0148476	up
XUT0632	TRUE	1.10421	0.0811391	unchanged	1.77877	0.00261389	up	1.55429	0.00954064	up	1.13484	0.18432	unchanged	1.6222	0.0421364	up
XUT0633	TRUE	1.1008	0.00539399	up	1.01285	0.00938767	up	0.639247	0.111556	unchanged	1.49361	0.00169981	up	1.60101	0.000484426	up
XUT0634	TRUE	1.82243	2.76483e-05	up	2.17098	3.39107e-07	up	2.47636	3.50307e-09	up	2.1694	0.000232389	up	2.62501	3.20752e-06	up
XUT0635	FALSE	0.183047	0.868659	unchanged	2.57382	0.0014303	up	2.76253	0.000574336	up	1.96394	0.0730484	unchanged	2.36774	0.0234084	up
XUT0636	TRUE	1.25645	0.397622	unchanged	3.07041	0.014843	up	3.37048	0.00702052	up	2.94853	0.0932079	unchanged	2.89951	0.0915154	unchanged
XUT0638	FALSE	0.543999	0.289743	unchanged	2.08974	2.54897e-06	up	1.89601	2.39178e-05	up	1.34028	0.0208737	up	1.7332	0.00164464	up
XUT0639	TRUE	1.32815	0.067342	unchanged	1.86308	0.00629108	up	2.074	0.00217746	up	2.62009	0.00171986	up	2.64478	0.00118627	up
XUT0640	FALSE	0.960019	0.166623	unchanged	1.69271	0.00808315	up	2.38105	0.000119643	up	2.12639	0.00657262	up	2.06116	0.00692311	up
XUT0643	TRUE	1.86964	1.23661e-06	up	2.32304	7.84307e-10	up	2.52952	1.37642e-11	up	2.40917	2.81212e-06	up	3.08855	3.02391e-10	up
XUT0644	TRUE	2.21192	7.97877e-11	up	2.61996	8.9837e-15	up	3.07081	2.26018e-20	up	2.5606	5.36515e-09	up	3.07079	3.70271e-13	up
XUT0645	TRUE	1.72683	0.000990641	up	3.0235	6.19374e-10	up	3.69222	1.16816e-14	up	3.66119	2.80254e-09	up	4.30665	6.41086e-13	up
XUT0646	TRUE	5.18708	0.00398755	up	6.09653	0.000322748	up	7.5582	4.92002e-06	up	4.75462	0.00735576	up	4.8252	0.00570834	up
XUT0647	FALSE	1.72942	0.0369371	up	2.92335	0.00012967	up	2.37174	0.00244966	up	4.84614	0.000135364	up	4.5049	0.000363583	up
XUT0648	TRUE	2.77261	0.00312773	up	2.36318	0.0117413	up	3.76942	1.88991e-05	up	2.80068	0.025489	up	4.18865	0.000341212	up
XUT0649	TRUE	0.454363	0.404918	unchanged	0.703753	0.157851	unchanged	1.7287	0.000261523	up	1.16982	0.0953234	unchanged	0.858935	0.215612	unchanged
XUT0650	FALSE	NA	NA	NA	NA	NA	NA	NA	NA	NA	NA	NA	NA	NA	NA	NA
XUT0651	FALSE	0.434073	0.420437	unchanged	1.69443	0.000269416	up	2.12627	3.33445e-06	up	2.04944	0.00017293	up	2.12149	6.70184e-05	up
XUT0652	FALSE	1.31457	NA	NA	0	1	unchanged	0	1	unchanged	2.50867	0.645917	unchanged	0	1	unchanged
XUT0653	TRUE	2.32353	2.11534e-21	up	2.66952	1.80646e-27	up	3.4769	1.92682e-47	up	2.77508	5.54749e-22	up	3.5505	3.14566e-37	up
XUT0654	FALSE	1.30979	0.0170283	up	2.31305	6.16298e-06	up	2.68556	9.79346e-08	up	1.55752	0.0365234	up	2.13584	0.00227366	up
XUT0655	TRUE	2.8033	6.65922e-17	up	2.41412	2.95355e-12	up	3.40178	1.34931e-24	up	2.15292	1.3096e-05	up	3.27879	9.6748e-13	up
XUT0656	FALSE	0.743925	0.390838	unchanged	2.35295	0.00145671	up	2.13699	0.00427129	up	3.79803	0.000307982	up	3.31532	0.0015889	up
XUT0660	TRUE	1.28286	0.0904438	unchanged	1.70873	0.0170143	up	2.22704	0.00143187	up	3.06227	0.00536197	up	3.65184	0.000535972	up
XUT0661	FALSE	0.760775	0.338958	unchanged	2.39372	0.000434297	up	2.74079	4.37946e-05	up	2.33109	0.0151154	up	3.08311	0.000680484	up
XUT0663	FALSE	1.67133	0.00739884	up	3.41359	1.82863e-09	up	3.16247	3.26952e-08	up	3.03027	1.748e-06	up	3.35959	5.0221e-08	up
XUT0664	FALSE	0.384435	0.705914	unchanged	2.32433	0.00393428	up	1.48096	0.0794872	unchanged	2.32851	0.042547	up	2.21183	0.0490385	up
XUT0665	TRUE	2.63662	2.36092e-06	up	3.07138	1.81956e-08	up	3.57031	2.60466e-11	up	3.95246	4.08654e-06	up	4.3506	2.04383e-07	up
XUT0667	TRUE	1.72619	0.00959453	up	3.18179	1.98786e-07	up	3.44913	1.23569e-08	up	4.0526	2.60263e-06	up	4.42507	1.56555e-07	up
XUT0668	TRUE	2.0885	0.00193815	up	3.81283	7.00043e-10	up	4.11066	1.95381e-11	up	2.86554	1.42887e-05	up	3.19618	6.02166e-07	up
XUT0669	FALSE	1.04549	0.132127	unchanged	2.81136	4.37104e-06	up	2.6474	1.73623e-05	up	2.19968	0.00260947	up	2.63431	0.000166508	up
XUT0670	TRUE	1.82184	0.0142832	up	1.90911	0.00882353	up	3.13982	4.73587e-06	up	2.85775	0.00522073	up	3.30459	0.000785896	up
XUT0671	TRUE	2.31423	3.30274e-15	up	2.33812	3.50982e-15	up	2.9566	2.1965e-24	up	2.56053	6.86557e-10	up	3.49026	1.27276e-18	up
XUT0672	TRUE	3.00345	0.0112785	up	4.13398	0.000181669	up	4.37236	6.69241e-05	up	5.63632	0.00345319	up	5.64281	0.00292454	up
XUT0673	TRUE	2.41597	6.21303e-17	up	2.81067	2.65398e-22	up	3.16629	1.3021e-28	up	2.89218	2.0056e-12	up	3.81557	3.32946e-22	up
XUT0674	TRUE	1.86722	0.0224882	up	2.87014	0.000166261	up	3.52854	2.12547e-06	up	2.00007	0.102325	unchanged	2.42724	0.037051	up
XUT0676	TRUE	1.56787	0.0989261	unchanged	1.19613	0.209127	unchanged	2.9311	0.000667072	up	4.60327	0.00741106	up	5.08753	0.00243149	up
XUT0677	FALSE	1.29733	0.196389	unchanged	3.11484	0.000371824	up	3.06266	0.000482073	up	2.98224	0.0135385	up	2.94644	0.0127176	up
XUT0678	TRUE	1.21558	0.13958	unchanged	1.60476	0.0390361	up	2.74154	0.000189002	up	2.72217	0.0168077	up	3.90436	0.000261849	up
XUT0679	TRUE	0.929891	0.0247762	unchanged	2.8227	2.31327e-14	up	2.50702	2.01391e-11	up	2.99824	4.87797e-11	up	3.07488	6.44806e-12	up
XUT0680	TRUE	1.07661	0.00918034	up	1.07285	0.00849166	up	1.52254	0.000124117	up	0.995586	0.0800567	unchanged	1.57213	0.00293668	up
XUT0681	TRUE	2.01282	1.60047e-05	up	2.87681	1.211e-10	up	3.1057	2.42229e-12	up	2.52653	2.74037e-06	up	2.39142	6.64843e-06	up
XUT0682	TRUE	1.51535	0.0275466	up	2.82044	7.86421e-06	up	2.82257	7.73764e-06	up	3.33557	0.00064288	up	3.72235	8.62474e-05	up
XUT0683	TRUE	2.51713	7.88756e-06	up	1.97279	0.000605016	up	3.19723	3.86042e-09	up	2.32369	0.00116419	up	3.54807	8.55052e-08	up
XUT0684	TRUE	0.444442	0.601998	unchanged	2.41314	0.000454963	up	2.19798	0.00158628	up	1.75502	0.0841797	unchanged	2.36091	0.0134431	up
XUT0685	TRUE	2.17044	0.00569902	up	2.4797	0.00104091	up	2.7792	0.000198248	up	2.88201	0.00670857	up	3.12995	0.00238374	up
XUT0686	TRUE	2.41937	1.43981e-13	up	3.03441	8.377e-21	up	3.39627	2.41276e-26	up	3.59115	1.18229e-16	up	3.59935	4.59262e-17	up
XUT0687	TRUE	2.55734	2.29941e-14	up	2.75283	2.67103e-16	up	3.33699	3.86831e-24	up	2.74529	7.93696e-10	up	3.37658	3.58435e-15	up
XUT0688	TRUE	2.17656	2.22355e-09	up	2.73039	2.28931e-14	up	2.81557	2.6951e-15	up	2.66105	2.08059e-08	up	2.98341	9.36211e-11	up
XUT0689	TRUE	2.54026	5.56971e-09	up	3.77348	2.45359e-19	up	4.00757	5.96365e-22	up	3.68165	4.30281e-11	up	4.16373	2.08157e-14	up
XUT0690	TRUE	1.45615	0.197769	unchanged	2.25576	0.0290696	up	3.13509	0.00162625	up	1.83238	0.180872	unchanged	2.59188	0.0421364	up
XUT0691	FALSE	-0.764113	0.27376	unchanged	2.54716	2.14676e-06	up	1.37005	0.0163241	up	2.06216	0.0243298	up	2.71827	0.00170427	up
XUT0692	TRUE	2.43222	9.61369e-23	up	2.96257	7.7938e-33	up	3.55677	3.62689e-48	up	3.03034	2.12547e-23	up	3.78175	1.30019e-37	up
XUT0696	TRUE	0.376386	0.64163	unchanged	2.70846	2.19131e-05	up	1.94872	0.00321376	up	1.81466	0.0382939	up	2.65846	0.00112712	up
XUT0697	FALSE	0.794973	0.462222	unchanged	2.67449	0.00308489	up	1.72091	0.0702177	unchanged	1.54098	0.20684	unchanged	1.86925	0.108065	unchanged
XUT0698	TRUE	1.84095	0.00432977	up	2.81853	3.32731e-06	up	2.80975	3.57672e-06	up	2.53476	0.00378125	up	3.10737	0.000199363	up
XUT0699	TRUE	1.56215	0.0496093	up	2.74612	0.000171115	up	3.70895	1.40487e-07	up	2.65359	0.00373905	up	3.20637	0.000257087	up
XUT0700	TRUE	2.59911	0.0216592	up	3.80504	0.000282263	up	4.14379	6.50798e-05	up	2.80428	0.0359738	up	3.5581	0.00514658	up
XUT0701	TRUE	1.43298	0.00552893	up	2.09795	2.02763e-05	up	2.98023	3.1467e-10	up	3.04625	1.173e-05	up	3.49767	1.88784e-07	up
XUT0702	FALSE	1.12868	0.134453	unchanged	1.90456	0.00619411	up	2.2258	0.00115183	up	1.53733	0.120332	unchanged	1.81082	0.054929	unchanged
XUT0703	FALSE	0.565428	0.196366	unchanged	1.02838	0.0110501	up	1.23662	0.00204897	up	1.57532	0.00178431	up	1.3596	0.0061332	up
XUT0704	TRUE	2.19607	6.63969e-06	up	3.04043	8.971e-11	up	3.55439	1.14798e-14	up	3.69535	1.40533e-07	up	3.60633	1.99311e-07	up
XUT0705	TRUE	2.15205	0.000626945	up	2.55573	2.7837e-05	up	3.08528	2.23543e-07	up	2.82864	0.0010282	up	3.25312	8.66729e-05	up
XUT0706	FALSE	2.92206	NA	NA	2.52631	0.391676	unchanged	4.50493	0.0882227	unchanged	0	1	unchanged	2.09484	0.698323	unchanged
XUT0707	FALSE	1.08349	0.148162	unchanged	1.8005	0.00914859	up	1.66574	0.0169332	up	2.7469	0.0193719	up	3.14213	0.00539951	up
XUT0708	FALSE	0.540206	0.574655	unchanged	1.93859	0.0164026	up	2.09026	0.00930511	up	1.6997	0.13404	unchanged	2.1355	0.0470276	up
XUT0709	TRUE	1.01437	0.128592	unchanged	2.55934	1.56678e-05	up	2.60935	1.02153e-05	up	3.11204	0.000709341	up	3.49043	8.7359e-05	up
XUT0710	TRUE	2.57825	2.55901e-22	up	3.29798	1.217e-35	up	3.97923	5.34355e-53	up	2.78961	8.61757e-16	up	3.83935	5.63223e-31	up
XUT0712	TRUE	1.37319	0.0387216	up	2.92787	1.12045e-06	up	3.01485	4.86237e-07	up	2.65858	0.00259569	up	2.99418	0.000439976	up
XUT0713	FALSE	0.776676	0.608169	unchanged	0.366572	0.801854	unchanged	1.36877	0.304141	unchanged	1.14122	0.605102	unchanged	2.58575	0.176062	unchanged
XUT0715	FALSE	0.58795	0.409189	unchanged	3.72072	2.05363e-11	up	4.01358	2.88842e-13	up	6.47788	2.98822e-05	up	6.50168	2.45807e-05	up
XUT0716	FALSE	1.3055	0.246998	unchanged	2.35592	0.0195507	up	2.37219	0.0188946	up	2.23841	0.162715	unchanged	2.41998	0.118375	unchanged
XUT0717	FALSE	0.710991	0.310577	unchanged	4.596	3.01524e-17	up	3.86819	2.39813e-12	up	4.43406	1.35739e-08	up	4.18162	7.20612e-08	up
XUT0718	TRUE	2.43618	3.85139e-34	up	2.46216	2.54424e-34	up	2.90815	3.08075e-48	up	2.79872	1.15918e-40	up	2.81637	3.49359e-42	up
XUT0719	TRUE	2.55217	0.00014949	up	2.32445	0.000498782	up	3.27508	3.42092e-07	up	2.36678	0.00330598	up	3.49037	3.76397e-06	up
XUT0720	FALSE	0.440488	0.577202	unchanged	2.24184	0.000547134	up	2.38438	0.000221461	up	1.92403	0.0643549	unchanged	2.71013	0.00543843	up
XUT0721	TRUE	2.34897	0.000467979	up	3.22293	4.31597e-07	up	3.51414	2.5524e-08	up	2.67692	0.000381522	up	3.34718	3.26334e-06	up
XUT0722	TRUE	1.47465	0.0208722	up	2.9628	3.98434e-07	up	3.00704	2.59701e-07	up	3.50118	2.15407e-06	up	4.15199	6.3861e-09	up
XUT0723	TRUE	1.62148	0.0608395	unchanged	2.19866	0.00692555	up	2.36782	0.0033896	up	2.34859	0.033266	up	3.26817	0.00157745	up
XUT0724	FALSE	0.689539	0.301496	unchanged	2.18935	0.00015912	up	1.23255	0.0436541	up	2.57328	0.000512571	up	2.19403	0.00285208	up
XUT0725	TRUE	2.92969	NA	NA	5.51183	0.00733172	up	4.77289	0.0233379	up	4.04451	0.0833306	unchanged	5.10715	0.0200225	up
XUT0726	FALSE	1.21809	0.102393	unchanged	2.04379	0.00306684	up	2.1666	0.00160315	up	1.89961	0.0641362	unchanged	2.27159	0.0201705	up
XUT0727	TRUE	2.55019	1.3581e-06	up	3.22539	3.00173e-10	up	3.56849	1.65403e-12	up	2.93863	0.000245246	up	3.86586	3.51536e-07	up
XUT0728	FALSE	-0.740354	0.492109	unchanged	2.34319	0.00402544	up	1.9856	0.0166916	up	1.38819	0.239808	unchanged	1.91347	0.085253	unchanged
XUT0729	FALSE	0.269937	0.756645	unchanged	1.22414	0.0892537	unchanged	1.48915	0.036334	up	1.70761	0.105923	unchanged	1.38213	0.185269	unchanged
XUT0730	TRUE	0.997941	0.0220007	unchanged	1.41895	0.00065422	up	1.54304	0.000195041	up	1.33486	0.0172165	up	1.10236	0.0454464	up
XUT0731	TRUE	2.58276	1.56293e-11	up	2.911	2.22408e-14	up	3.66476	6.54346e-23	up	3.02097	1.34766e-08	up	4.02681	2.3303e-15	up
XUT0732	TRUE	1.76463	1.22028e-05	up	2.73407	1.34042e-12	up	3.04254	1.40533e-15	up	2.9751	5.38789e-09	up	3.31107	2.43911e-11	up
XUT0733	TRUE	2.30754	1.10768e-10	up	2.19522	1.42896e-09	up	2.90103	1.57729e-16	up	2.49608	7.08131e-07	up	3.05416	2.27825e-10	up
XUT0735	FALSE	0.935015	0.155054	unchanged	2.22302	0.000160683	up	2.43243	3.0813e-05	up	2.52518	0.0100931	up	3.21351	0.000564381	up
XUT0736	FALSE	0.220424	0.758671	unchanged	1.19462	0.0431365	up	1.23602	0.0366863	up	2.91985	0.00112922	up	3.05009	0.000494176	up
XUT0737	TRUE	1.33067	0.0554254	unchanged	1.97559	0.00253312	up	2.5717	5.20175e-05	up	2.64166	0.00388559	up	2.51323	0.00518618	up
XUT0738	TRUE	2.2232	1.2647e-12	up	2.68278	7.32658e-18	up	3.1714	3.56582e-25	up	2.035	5.60919e-06	up	3.41195	1.72973e-16	up
XUT0739	TRUE	1.92359	1.2469e-06	up	1.62982	4.65162e-05	up	2.46772	1.51045e-10	up	2.46965	8.91345e-06	up	3.32342	2.52547e-10	up
XUT0740	TRUE	2.65874	1.70901e-11	up	3.13681	1.07543e-15	up	3.71716	3.43594e-22	up	3.35042	2.2182e-09	up	3.95841	2.96732e-13	up
XUT0741	TRUE	2.91954	9.06875e-32	up	2.12493	6.71514e-17	up	3.30958	1.10597e-40	up	1.92266	2.22964e-11	up	1.99064	1.86436e-12	up
XUT0742	TRUE	1.95402	0.000184735	up	3.20086	6.92258e-11	up	3.72566	1.17108e-14	up	2.91532	1.93074e-06	up	3.42287	6.84468e-09	up
XUT0743	TRUE	2.54997	2.15525e-17	up	1.90362	7.8966e-10	up	3.30963	4.80096e-29	up	1.96213	1.58434e-07	up	3.03861	4.71007e-18	up
XUT0744	FALSE	1.63469	NA	NA	2.54461	0.626115	unchanged	0	1	unchanged	NA	NA	NA	NA	NA	NA
XUT0745	TRUE	2.64357	9.61296e-10	up	2.59866	2.39704e-09	up	3.34049	2.60674e-15	up	2.29524	2.342e-05	up	3.02269	4.04625e-09	up
XUT0746	TRUE	1.61366	0.000369356	up	2.59707	1.37695e-09	up	3.02648	7.6459e-13	up	3.19001	2.20631e-08	up	3.56048	1.4189e-10	up
XUT0747	FALSE	0.688961	0.358415	unchanged	1.91511	0.00342941	up	2.46955	0.00011141	up	1.97912	0.0490062	up	0.909331	0.382514	unchanged
XUT0748	FALSE	0.789554	0.304254	unchanged	2.00274	0.00303856	up	1.89757	0.00530052	up	1.26852	0.108604	unchanged	2.10848	0.00382344	up
XUT0749	TRUE	1.55777	0.00267229	up	2.15014	1.45773e-05	up	2.42346	7.58503e-07	up	3.0212	8.27532e-05	up	4.06103	2.52094e-08	up
XUT0750	FALSE	0.553737	0.121458	unchanged	2.33003	1.16499e-13	up	1.91809	1.92789e-09	up	2.12899	7.00788e-07	up	2.36725	1.21028e-08	up
XUT0751	FALSE	1.04512	0.0168579	up	2.14021	1.30933e-07	up	2.47059	6.41149e-10	up	2.77443	5.17361e-07	up	2.82034	1.91383e-07	up
XUT0752	FALSE	1.92909	0.314916	unchanged	3.41104	0.0416791	up	2.96921	0.082074	unchanged	4.22579	0.0387526	up	3.12709	0.131819	unchanged
XUT0753	TRUE	1.62422	0.000483499	up	2.08065	3.95416e-06	up	2.3938	6.97959e-08	up	1.96268	0.00251589	up	2.48052	5.7331e-05	up
XUT0754	TRUE	2.07585	3.5094e-06	up	2.14293	1.48196e-06	up	2.81996	6.39415e-11	up	1.87265	0.00161236	up	2.11316	0.00021121	up
XUT0755	TRUE	2.17235	1.13901e-08	up	2.66242	1.23713e-12	up	2.78689	7.46451e-14	up	2.61303	7.0244e-08	up	2.85918	1.25357e-09	up
XUT0756	TRUE	2.32819	6.36117e-10	up	2.18407	1.04772e-08	up	2.59177	4.28314e-12	up	2.03322	0.000189845	up	2.98982	4.18185e-09	up
XUT0757	TRUE	2.66473	8.90605e-11	up	2.7018	6.95566e-11	up	3.63857	8.29344e-20	up	3.15309	2.91333e-08	up	3.73553	1.04554e-11	up
XUT0758	TRUE	2.12836	1.31875e-15	up	2.55618	6.63677e-22	up	2.99779	2.15116e-30	up	2.42446	2.94115e-14	up	2.89319	6.87157e-21	up
XUT0759	TRUE	2.40885	1.35111e-18	up	1.76725	5.33908e-10	up	2.65706	3.0047e-22	up	1.88816	2.35004e-06	up	2.70702	6.60688e-13	up
XUT0760	TRUE	1.34725	0.00923545	up	2.41317	5.76288e-07	up	2.67381	2.12345e-08	up	2.17462	0.00167236	up	2.41111	0.000310649	up
XUT0761	TRUE	2.54907	2.19368e-27	up	2.42658	3.2625e-24	up	3.14384	4.11554e-41	up	2.49652	2.63106e-17	up	3.51994	1.11488e-35	up
XUT0762	TRUE	1.61795	0.296139	unchanged	4.96185	8.52073e-05	up	5.2453	2.93226e-05	up	2.82257	0.00949208	up	3.19342	0.00237513	up
XUT0764	TRUE	0.96395	0.246243	unchanged	1.97021	0.00815551	up	1.5773	0.0386985	up	1.40587	0.206441	unchanged	2.17361	0.0348003	up
XUT0765	TRUE	2.12048	2.4452e-14	up	2.31729	1.12781e-16	up	3.04672	4.79496e-29	up	3.44374	1.51257e-25	up	3.01693	4.31959e-20	up
XUT0766	FALSE	0.973541	0.456239	unchanged	2.88565	0.00822084	up	2.61899	0.0179076	up	2.75225	0.121557	unchanged	2.41142	0.170704	unchanged
XUT0767	FALSE	0.739935	0.0685064	unchanged	1.8609	5.50211e-07	up	1.62219	1.64204e-05	up	1.9426	0.000179133	up	1.92014	0.000146677	up
XUT0768	FALSE	0.926344	8.77543e-05	unchanged	1.73438	1.1887e-14	up	2.17278	1.31209e-22	up	1.83595	3.48293e-10	up	2.08905	3.1425e-13	up
XUT0769	FALSE	1.05326	0.247567	unchanged	4.16953	2.13979e-08	up	3.56874	2.37885e-06	up	4.0461	7.6754e-05	up	3.43532	0.00080682	up
XUT0770	FALSE	1.28495	0.0521347	unchanged	2.74873	4.52901e-06	up	2.91945	9.46647e-07	up	2.13866	0.0135997	up	2.22412	0.00816554	up
XUT0771	FALSE	0.749371	0.439757	unchanged	2.37805	0.00381545	up	2.42044	0.00323122	up	2.04957	0.0428853	up	2.72229	0.00432024	up
XUT0772	TRUE	2.90217	2.54106e-27	up	2.61605	2.36543e-21	up	3.79978	1.92626e-46	up	3.10669	3.71922e-16	up	4.07776	1.19097e-28	up
XUT0773	TRUE	2.81862	3.91861e-30	up	1.9919	8.20347e-15	up	3.03647	1.53815e-34	up	2.98061	1.78849e-27	up	3.60852	1.70944e-41	up
XUT0774	TRUE	2.66651	3.94376e-07	up	3.30048	1.12837e-10	up	3.79064	4.8907e-14	up	3.14364	6.53197e-07	up	3.60946	3.56606e-09	up
XUT0775	TRUE	2.22591	0.00419082	up	2.22504	0.00356562	up	3.10456	2.26456e-05	up	2.70004	0.00764229	up	2.47159	0.0131651	up
XUT0776	TRUE	2.87122	0.00340453	up	3.11808	0.000978918	up	3.95131	1.67952e-05	up	2.80511	0.0389383	up	3.07409	0.0190772	up
XUT0777	TRUE	2.47347	0.00277741	up	2.35517	0.00384558	up	3.72127	1.40643e-06	up	1.94425	0.0930913	unchanged	2.40927	0.0283205	up
XUT0778	TRUE	3.12057	3.5724e-29	up	4.03561	3.79924e-48	up	4.48906	1.74367e-60	up	4.76879	1.42117e-46	up	4.69305	7.03447e-46	up
XUT0779	FALSE	1.6993	0.0152416	up	2.00851	0.0029271	up	2.52911	0.000122806	up	2.48271	0.0153793	up	2.71101	0.00607279	up
XUT0780	TRUE	2.77894	1.54008e-35	up	2.66846	8.87673e-32	up	3.601	3.63469e-59	up	2.42234	1.07728e-18	up	3.55975	6.80282e-42	up
XUT0781	TRUE	3.24469	1.81285e-29	up	3.12797	7.8067e-27	up	4.11714	2.72362e-47	up	3.8505	5.52351e-26	up	4.57556	1.70204e-37	up
XUT0782	TRUE	4.33402	3.3471e-09	up	3.67728	6.14824e-07	up	5.33365	4.899e-14	up	4.72602	8.02622e-05	up	5.80154	6.41842e-07	up
XUT0783	FALSE	1.50355	0.0713827	unchanged	2.53282	0.000971131	up	2.85527	0.000165283	up	2.19248	0.00685964	up	1.47411	0.0720001	unchanged
XUT0784	TRUE	2.2481	0.0146716	up	3.46797	4.851e-05	up	3.8056	6.47539e-06	up	5.21188	0.00149237	up	5.70918	0.000394235	up
XUT0785	FALSE	0.495073	0.743268	unchanged	1.11761	0.38482	unchanged	1.12803	0.382289	unchanged	1.25797	0.413923	unchanged	1.08221	0.471871	unchanged
XUT0786	FALSE	1.46287	0.0577865	unchanged	2.31514	0.0012311	up	2.25469	0.00172539	up	2.55961	0.00810817	up	2.5283	0.00739754	up
XUT0787	TRUE	2.18612	2.53075e-08	up	1.8695	2.77827e-06	up	2.89441	3.37714e-14	up	1.3874	0.0146756	up	2.41686	3.27192e-06	up
XUT0788	TRUE	7.31413	9.54403e-07	up	3.68761	0.0178924	up	7.74954	6.04857e-08	up	3.63757	0.0296282	up	6.93804	6.10434e-06	up
XUT0789	TRUE	2.76343	1.96646e-10	up	2.85665	5.25083e-11	up	3.41466	1.01626e-15	up	2.84154	3.86145e-07	up	3.53863	4.07743e-11	up
XUT0790	TRUE	2.16003	0.0455813	up	3.3271	0.000830162	up	3.49187	0.000422518	up	5.41531	0.00108361	up	5.38001	0.00104129	up
XUT0791	FALSE	0.618617	0.324997	unchanged	2.50024	2.5579e-06	up	2.28021	2.18148e-05	up	2.27126	0.00613137	up	2.14101	0.00836865	up
XUT0793	TRUE	2.18752	2.78696e-20	up	2.33721	1.98468e-22	up	3.23133	1.21556e-43	up	2.42991	1.23197e-16	up	3.08974	1.9335e-27	up
XUT0794	TRUE	0.806013	0.379249	unchanged	1.5912	0.05123	unchanged	1.61715	0.0480198	up	2.05913	0.0257492	up	1.74783	0.0553521	unchanged
XUT0795	TRUE	1.08088	0.0375636	up	3.05439	3.72917e-11	up	2.92093	2.9441e-10	up	3.1437	2.50981e-07	up	2.75723	5.56789e-06	up
XUT0796	FALSE	-0.0793235	0.927927	unchanged	2.3276	0.000177494	up	1.44365	0.0256912	up	2.46851	0.000665452	up	2.287	0.00139567	up
XUT0797	TRUE	2.0578	0.000403372	up	3.30628	1.31905e-09	up	3.75364	2.69773e-12	up	2.77146	0.000149437	up	3.54325	3.64153e-07	up
XUT0798	FALSE	1.9821	0.0464034	up	3.73673	3.16678e-05	up	3.61906	5.89582e-05	up	2.38228	0.0342018	up	2.83763	0.00829462	up
XUT0800	TRUE	3.15949	0.00300334	up	3.60566	0.00039723	up	4.50431	5.53011e-06	up	7.0556	2.46328e-05	up	7.08887	1.90675e-05	up
XUT0801	TRUE	1.04753	0.259187	unchanged	1.46664	0.0858164	unchanged	1.77409	0.0353571	up	1.30116	0.204016	unchanged	1.31059	0.184941	unchanged
XUT0802	TRUE	2.34702	1.22403e-05	up	2.70962	2.37444e-07	up	3.13048	1.24569e-09	up	2.24777	0.000861717	up	3.31159	1.37686e-07	up
XUT0803	TRUE	1.51902	0.0186418	up	1.92013	0.00188296	up	2.45493	4.75864e-05	up	2.2817	0.00668869	up	2.7375	0.000669242	up
XUT0804	TRUE	1.2722	0.0366363	up	1.93791	0.00074334	up	2.7431	7.50521e-07	up	2.45481	0.000883306	up	2.56364	0.000360143	up
XUT0805	TRUE	1.71709	0.000576215	up	2.40364	5.14384e-07	up	3.44165	6.45609e-14	up	2.93166	2.25394e-05	up	3.43918	2.54231e-07	up
XUT0806	TRUE	1.06843	0.0455755	up	1.94682	8.98917e-05	up	1.79112	0.000354744	up	1.66633	0.00614493	up	1.39557	0.0199301	up
XUT0807	TRUE	4.6553	0.000332258	up	4.50009	0.000330178	up	5.69193	3.31632e-06	up	2.68222	0.0829402	unchanged	4.4849	0.00158161	up
XUT0808	TRUE	2.60216	5.49386e-16	up	2.25223	9.44509e-12	up	3.32898	7.7628e-26	up	3.48467	3.78791e-12	up	4.28894	1.02792e-18	up
XUT0809	FALSE	0.579876	0.205477	unchanged	1.15313	0.0062997	up	1.2393	0.00321373	up	1.67163	0.00159376	up	1.65283	0.00133125	up
XUT0810	TRUE	2.26705	1.63294e-12	up	2.56059	1.42647e-15	up	3.3145	2.86614e-26	up	2.77966	2.6757e-12	up	3.5477	1.79301e-20	up
XUT0811	TRUE	1.88791	3.90868e-06	up	2.43879	9.86828e-10	up	3.11225	1.0577e-15	up	2.93569	2.23627e-07	up	3.91771	3.96034e-13	up
XUT0812	TRUE	1.67009	0.0377137	up	2.84493	0.000123317	up	3.55253	8.55407e-07	up	3.21296	0.00333824	up	3.62575	0.000617296	up
XUT0813	TRUE	0.907849	0.137622	unchanged	2.57245	1.88569e-06	up	2.28431	2.9581e-05	up	2.48907	0.000825357	up	2.00646	0.00688507	up
XUT0814	TRUE	1.20367	0.0499455	up	2.69258	1.26013e-06	up	2.81961	3.40712e-07	up	1.99809	0.0158134	up	3.04051	7.44214e-05	up
XUT0815	TRUE	3.07423	4.65118e-47	up	2.75302	2.32439e-36	up	3.97706	1.96895e-78	up	2.1553	3.99382e-16	up	3.49764	1.12886e-43	up
XUT0816	TRUE	3.23292	0.0016942	up	3.755	0.000133096	up	4.69595	9.56358e-07	up	3.36531	0.00135933	up	3.93567	0.000103369	up
XUT0817	TRUE	3.66086	1.41561e-14	up	3.435	8.53358e-13	up	4.39515	4.59997e-21	up	3.55045	5.07537e-09	up	4.1325	2.35674e-12	up
XUT0818	TRUE	1.46336	0.194471	unchanged	3.01388	0.00246891	up	2.9534	0.00311061	up	1.68734	0.216713	unchanged	1.87414	0.152644	unchanged
XUT0819	TRUE	1.57562	0.00639226	up	3.8702	5.19032e-14	up	3.90519	2.56886e-14	up	3.55066	5.42148e-10	up	3.39644	2.05135e-09	up
XUT0820	TRUE	2.09186	4.77531e-16	up	2.12369	3.91059e-16	up	2.77695	1.06796e-27	up	2.75943	3.90851e-15	up	3.48656	5.41798e-25	up
XUT0821	FALSE	1.0925	0.0060081	up	3.30422	1.52274e-20	up	3.03075	2.35716e-17	up	2.27122	6.01495e-07	up	2.3283	1.73056e-07	up
XUT0822	TRUE	2.1735	2.1683e-09	up	3.31184	4.00378e-21	up	3.35938	7.46076e-22	up	3.02669	2.46865e-11	up	3.46985	3.67083e-15	up
XUT0823	TRUE	2.53008	0.0426696	up	4.02294	0.00041703	up	4.3083	0.000139471	up	3.38398	0.00757753	up	3.55689	0.00398727	up
XUT0824	TRUE	2.89263	5.52362e-05	up	3.01926	1.70078e-05	up	3.27573	2.38366e-06	up	3.66641	1.02944e-05	up	3.98564	9.01615e-07	up
XUT0826	TRUE	0.904902	0.227974	unchanged	2.25712	0.000666241	up	2.18217	0.00105835	up	2.63181	0.00398353	up	3.06797	0.000471274	up
XUT0827	TRUE	1.33583	0.0180405	up	2.93762	1.02028e-08	up	3.08068	1.53909e-09	up	2.5499	0.000128262	up	2.68783	3.36415e-05	up
XUT0828	TRUE	1.67896	1.30219e-05	up	3.65067	1.59577e-24	up	3.38948	3.13034e-21	up	3.36604	2.20955e-11	up	3.69815	5.64204e-14	up
XUT0829	TRUE	2.80796	6.05437e-36	up	2.93696	1.75915e-38	up	3.60563	7.24981e-59	up	3.05086	8.14977e-34	up	3.72184	4.60186e-52	up
XUT0830	FALSE	1.11609	0.134908	unchanged	2.94172	6.76583e-06	up	3.06494	2.44808e-06	up	2.45098	0.00375587	up	2.78658	0.000616614	up
XUT0831	FALSE	1.38821	0.0233367	up	2.90668	1.75773e-07	up	2.8994	1.88829e-07	up	3.11921	8.76541e-05	up	3.13025	5.92103e-05	up
XUT0832	TRUE	2.38397	4.80774e-31	up	2.44897	6.13871e-32	up	2.89666	3.58799e-45	up	2.85314	6.86639e-33	up	3.2701	1.61911e-44	up
XUT0833	TRUE	2.38942	0.000256479	up	2.41391	0.000183615	up	3.31197	9.135e-08	up	2.5646	0.000785814	up	2.2734	0.00263286	up
XUT0834	TRUE	4.47951	0.0079844	up	4.536	0.00489624	up	5.85967	0.000189787	up	3.69642	0.0127627	up	4.31853	0.00264097	up
XUT0835	TRUE	2.1805	0.00666006	up	3.18548	2.30694e-05	up	3.30696	1.01395e-05	up	4.75652	1.14202e-05	up	4.2992	7.05332e-05	up
XUT0836	FALSE	0.205897	0.836227	unchanged	1.79886	0.0197114	up	1.38127	0.0813955	unchanged	1.02433	0.39513	unchanged	1.56825	0.158942	unchanged
XUT0837	TRUE	1.33818	0.0263776	up	2.28867	4.65094e-05	up	2.33361	3.17386e-05	up	2.43603	0.00311967	up	2.85176	0.000304533	up
XUT0838	TRUE	1.48823	0.0262577	up	2.22841	0.000405508	up	2.13273	0.000762901	up	1.79137	0.0330488	up	1.4361	0.0845072	unchanged
XUT0839	FALSE	2.48475	0.0385297	up	2.07705	0.0815712	unchanged	4.43037	4.77306e-05	up	4.05346	0.0298404	up	4.59686	0.0110848	up
XUT0840	TRUE	0.879933	0.38028	unchanged	2.2289	0.0102276	up	2.12531	0.0150671	up	2.6352	0.0568089	unchanged	3.07773	0.0200404	up
XUT0841	TRUE	2.5573	0.000311997	up	3.77697	1.46818e-08	up	4.13878	3.35699e-10	up	4.0035	3.32335e-05	up	4.52375	1.49325e-06	up
XUT0842	TRUE	1.27178	4.58159e-08	up	2.14255	2.14973e-21	up	2.11136	7.48173e-21	up	2.6142	5.16017e-24	up	2.29257	4.66987e-19	up
XUT0844	TRUE	1.6232	2.75692e-06	up	2.58312	7.23133e-15	up	2.86315	2.97947e-18	up	2.1606	1.23671e-07	up	2.81668	4.75012e-13	up
XUT0845	TRUE	2.18425	1.30409e-09	up	3.03753	5.15631e-18	up	3.08995	1.03768e-18	up	2.95277	6.34907e-11	up	3.59308	1.96272e-16	up
XUT0846	TRUE	1.02704	0.062612	unchanged	2.48826	5.67039e-07	up	2.46435	7.50521e-07	up	3.11898	2.5607e-06	up	3.09538	2.0346e-06	up
XUT0847	FALSE	0.968771	0.0992986	unchanged	3.17273	5.24287e-10	up	2.68977	2.27628e-07	up	2.44062	0.000883238	up	2.36682	0.00100761	up
XUT0848	TRUE	3.37483	0.0195611	up	4.52431	0.000751248	up	4.33747	0.00129231	up	2.49412	0.0799574	unchanged	3.20147	0.017653	up
XUT0849	FALSE	0.975379	0.549975	unchanged	3.34973	0.0108957	up	3.23959	0.0143557	up	5.63605	0.00622562	up	5.17606	0.0115127	up
XUT0850	FALSE	0.918409	0.579311	unchanged	3.62975	0.00570113	up	3.44434	0.00920096	up	4.18912	0.0254762	up	4.51171	0.0137669	up
XUT0851	TRUE	NA	NA	NA	NA	NA	NA	NA	NA	NA	2.50867	0.645917	unchanged	0	1	unchanged
XUT0852	TRUE	1.51445	0.269167	unchanged	4.25798	0.000190786	up	5.03192	7.46403e-06	up	6.05552	0.000781363	up	6.79664	0.00011254	up
XUT0853	TRUE	1.99223	0.24999	unchanged	3.09389	0.0454386	up	3.43075	0.0250089	up	3.50601	0.219249	unchanged	4.59846	0.0857491	unchanged
XUT0854	TRUE	1.90013	0.000699581	up	2.53696	2.35119e-06	up	2.87521	5.68377e-08	up	2.15367	0.00294924	up	2.74499	6.35579e-05	up
XUT0855	TRUE	1.35297	0.092944	unchanged	3.31812	2.81216e-06	up	3.35381	2.11579e-06	up	4.42963	3.62792e-05	up	4.82864	4.36778e-06	up
XUT0857	TRUE	2.11321	5.77586e-05	up	3.65595	9.17393e-14	up	3.85867	2.29524e-15	up	3.92923	3.84896e-07	up	4.9145	5.04049e-11	up
XUT0858	FALSE	0.855525	0.0668167	unchanged	2.1739	2.79043e-07	up	2.3336	2.82088e-08	up	3.43626	3.50874e-11	up	3.73383	2.01998e-13	up
XUT0859	FALSE	0.566292	0.34187	unchanged	0.679235	0.219463	unchanged	0.861805	0.115508	unchanged	0.815676	0.270149	unchanged	0.738411	0.303684	unchanged
XUT0860	TRUE	2.68679	3.76045e-47	up	3.08439	3.88554e-61	up	3.66352	2.23977e-87	up	3.12719	1.52921e-48	up	3.79347	1.16199e-73	up
XUT0861	TRUE	1.71413	0.00348825	up	2.66218	1.43351e-06	up	2.94554	6.78623e-08	up	1.90027	0.015576	up	2.30842	0.0020264	up
XUT0862	TRUE	0.60974	NA	NA	2.71556	0.100405	unchanged	1.93787	0.261713	unchanged	3.04642	0.181252	unchanged	3.42314	0.118848	unchanged
XUT0863	TRUE	1.30532	0.000179547	up	2.17766	5.02486e-11	up	2.40096	2.65169e-13	up	1.9188	2.75707e-06	up	2.4079	8.04382e-10	up
XUT0864	TRUE	1.27077	0.0915654	unchanged	2.52451	0.000222806	up	2.35604	0.000635531	up	1.79887	0.0949896	unchanged	1.91455	0.0653371	unchanged
XUT0865	FALSE	0.382994	0.559816	unchanged	1.46131	0.00928078	up	0.857654	0.143226	unchanged	0.389644	0.715246	unchanged	0.330427	0.746508	unchanged
XUT0867	TRUE	2.23735	0.000387061	up	2.75718	5.84473e-06	up	3.42396	7.39779e-09	up	3.17216	0.000390921	up	3.44763	7.17093e-05	up
XUT0868	TRUE	1.94795	0.00177551	up	3.32203	9.17571e-09	up	3.36162	5.61856e-09	up	2.45703	0.000981684	up	3.07737	1.45066e-05	up
XUT0869	TRUE	3.16671	1.41081e-32	up	1.92755	1.25226e-11	up	3.403	5.02143e-37	up	2.68184	2.13576e-15	up	3.54659	5.68514e-28	up
XUT0870	TRUE	2.65914	0.00981884	up	4.28363	5.94245e-06	up	4.45925	2.13665e-06	up	4.28616	0.00111056	up	4.5836	0.000369676	up
XUT0871	TRUE	3.57952	1.05158e-05	up	4.07929	2.03991e-07	up	4.2191	6.58261e-08	up	5.89819	0.000195582	up	5.86633	0.000187543	up
XUT0872	TRUE	2.28755	0.000322229	up	2.94491	1.34468e-06	up	3.1529	1.81616e-07	up	2.66936	0.000474865	up	2.38698	0.00159438	up
XUT0873	TRUE	3.04916	4.72524e-26	up	4.24932	4.01773e-50	up	4.74673	1.47473e-63	up	4.72271	5.82932e-32	up	5.41965	7.15122e-43	up
XUT0874	TRUE	2.79413	1.39637e-06	up	3.31129	4.49866e-09	up	4.02143	2.93825e-13	up	2.93447	2.62867e-05	up	3.81035	1.01612e-08	up
XUT0875	TRUE	1.9934	0.0322097	up	2.82058	0.00119897	up	2.68093	0.00223166	up	1.95604	0.0876102	unchanged	2.5774	0.0170668	up
XUT0876	FALSE	1.24576	0.553678	unchanged	3.44295	0.0459718	up	3.09786	0.076924	unchanged	4.06664	0.0879668	unchanged	5.31248	0.0176548	up
XUT0877	TRUE	1.21145	0.0161554	up	2.2534	1.53252e-06	up	2.62968	1.16745e-08	up	2.39679	0.000725371	up	2.75479	5.3209e-05	up
XUT0878	TRUE	1.90393	0.000726143	up	3.38012	9.80187e-11	up	3.67115	1.22606e-12	up	3.60791	6.85182e-07	up	4.18824	2.88237e-09	up
XUT0879	TRUE	2.96893	0.0353165	up	3.92823	0.00274541	up	4.74314	0.000223819	up	5.78553	0.00137202	up	6.77538	0.000110574	up
XUT0880	FALSE	0.373871	0.498464	unchanged	0.686771	0.167567	unchanged	0.701255	0.160024	unchanged	0.624957	0.457096	unchanged	1.45843	0.0516852	unchanged
XUT0881	TRUE	1.95662	3.14232e-06	up	2.39585	5.3179e-09	up	3.32492	5.66689e-17	up	2.43502	9.75289e-07	up	3.45373	1.70459e-13	up
XUT0882	TRUE	2.44066	2.16411e-14	up	3.08319	1.95513e-22	up	3.55759	3.04372e-30	up	3.2535	5.21884e-15	up	3.82961	2.34897e-21	up
XUT0883	FALSE	0.252969	0.772967	unchanged	1.89717	0.00596712	up	1.64918	0.0185668	up	1.52983	0.0877682	unchanged	1.5047	0.0834176	unchanged
XUT0884	TRUE	2.75799	1.52123e-06	up	3.42456	7.38586e-10	up	4.00711	2.05486e-13	up	4.00122	2.46127e-07	up	4.78437	2.06648e-10	up
XUT0885	TRUE	2.52598	6.30252e-05	up	3.4322	1.16156e-08	up	3.77634	2.19543e-10	up	3.02156	7.6859e-05	up	3.30905	8.18401e-06	up
XUT0886	FALSE	0.885759	0.578285	unchanged	2.31545	0.0838304	unchanged	2.23002	0.0985826	unchanged	1.9037	0.35894	unchanged	2.17242	0.274329	unchanged
XUT0887	FALSE	1.00269	0.249461	unchanged	2.83453	0.000156174	up	2.73587	0.000280411	up	3.65259	0.000652895	up	3.36132	0.00155165	up
XUT0888	TRUE	1.60325	0.00510818	up	2.5917	1.39171e-06	up	2.73919	2.88506e-07	up	2.15724	0.00107324	up	2.64617	2.62194e-05	up
XUT0890	FALSE	0.611881	0.515708	unchanged	1.61328	0.0477534	up	1.36605	0.09977	unchanged	1.15439	0.351343	unchanged	1.35295	0.251521	unchanged
XUT0891	FALSE	0.800872	0.0532553	unchanged	2.14559	1.17702e-08	up	2.16005	9.23131e-09	up	2.53113	1.12249e-06	up	2.39628	2.84071e-06	up
XUT0892	TRUE	1.3448	0.294134	unchanged	1.87516	0.10902	unchanged	2.16617	0.0608087	unchanged	1.02615	0.527175	unchanged	1.8613	0.202945	unchanged
XUT0893	FALSE	0.286281	0.511734	unchanged	1.99654	3.62949e-08	up	2.1005	5.91579e-09	up	1.91799	0.000118444	up	2.23151	3.21081e-06	up
XUT0894	TRUE	2.02398	0.00746365	up	2.39079	0.00101057	up	2.66206	0.000212186	up	3.08148	0.000491282	up	3.05246	0.000434547	up
XUT0895	TRUE	0.779841	0.41574	unchanged	1.86545	0.0258038	up	1.99766	0.0165769	up	2.60552	0.032017	up	2.80677	0.0168496	up
XUT0896	FALSE	0.912324	0.193314	unchanged	1.72854	0.00689924	up	1.62608	0.0116861	up	1.70866	0.0493785	up	1.78794	0.0329457	up
XUT0897	TRUE	1.19773	0.0719978	unchanged	2.39771	7.97112e-05	up	2.54862	2.45168e-05	up	2.55096	0.00181911	up	2.37712	0.00313809	up
XUT0898	TRUE	2.12453	4.93704e-07	up	2.17412	2.59298e-07	up	2.98269	2.46525e-13	up	1.80702	0.00155428	up	2.93026	2.65237e-08	up
XUT0899	FALSE	1.14213	0.282335	unchanged	2.16535	0.0222001	up	2.51188	0.00711778	up	2.47458	0.0639889	unchanged	3.78923	0.00218799	up
XUT0900	TRUE	2.40908	1.55407e-05	up	2.98213	3.39486e-08	up	3.39863	1.60033e-10	up	4.28464	3.7879e-05	up	5.32896	1.20532e-07	up
XUT0902	FALSE	0.265727	0.730939	unchanged	1.97011	0.00133956	up	1.96987	0.0013702	up	1.56859	0.116061	unchanged	1.9262	0.0415771	up
XUT0903	FALSE	0.894799	0.473962	unchanged	2.72805	0.00897649	up	2.43984	0.0213167	up	2.64479	0.0712364	unchanged	2.25408	0.120787	unchanged
XUT0904	TRUE	3.20267	3.75297e-36	up	2.75596	9.38209e-26	up	3.79691	2.92544e-50	up	2.11208	9.23794e-11	up	3.64737	6.77366e-33	up
XUT0905	FALSE	1.93641	0.031984	up	3.429	3.13042e-05	up	3.43321	3.03036e-05	up	2.93872	0.00957824	up	3.75725	0.000513231	up
XUT0906	TRUE	3.05125	5.8302e-16	up	3.312	1.67928e-18	up	3.82398	6.57447e-25	up	2.8249	8.71251e-11	up	3.75307	1.82672e-19	up
XUT0907	TRUE	3.72311	0.00458483	up	4.98387	4.79418e-05	up	5.77138	1.78982e-06	up	7.06165	1.78106e-05	up	7.64344	2.48622e-06	up
XUT0908	FALSE	-0.498864	0.567932	unchanged	0.735961	0.323311	unchanged	0.787681	0.291015	unchanged	1.60432	0.183057	unchanged	1.72046	0.137887	unchanged
XUT0909	TRUE	2.55352	2.195e-33	up	2.51299	2.91422e-31	up	3.25441	1.75932e-53	up	2.89031	5.81567e-27	up	3.62994	3.16718e-44	up
XUT0910	TRUE	0.971678	0.137622	unchanged	1.88602	0.00164765	up	2.41375	3.6507e-05	up	3.02724	0.000173932	up	3.48667	7.48353e-06	up
XUT0911	TRUE	1.79437	0.00458234	up	4.18671	1.25221e-13	up	3.81969	1.93909e-11	up	4.62205	4.492e-12	up	3.99681	2.38779e-09	up
XUT0912	FALSE	-0.131746	0.902127	unchanged	2.3693	0.00177138	up	2.30582	0.00245662	up	1.94429	0.0934403	unchanged	2.41091	0.0283963	up
XUT0914	TRUE	1.17702	0.0458008	up	2.55606	1.94714e-06	up	2.53272	2.49566e-06	up	2.60774	0.000175914	up	2.63422	0.000106551	up
XUT0915	FALSE	-0.791764	NA	NA	1.39129	0.656547	unchanged	0.187772	0.956342	unchanged	2.50209	0.566635	unchanged	2.06984	0.632069	unchanged
XUT0916	TRUE	1.67925	0.012424	up	1.79136	0.00620462	up	2.03556	0.00162766	up	1.98677	0.0279189	up	1.97673	0.0243717	up
XUT0917	TRUE	4.8627	0.00246347	up	5.54011	0.00025907	up	6.5954	1.01331e-05	up	5.61104	0.000426745	up	6.10217	9.99307e-05	up
XUT0918	TRUE	2.50117	2.85198e-05	up	3.93392	2.51829e-12	up	4.101	2.02262e-13	up	3.53056	1.02011e-05	up	4.0002	2.67892e-07	up
XUT0919	FALSE	1.32214	0.273158	unchanged	2.5503	0.0167743	up	2.48398	0.0205037	up	3.68473	0.016749	up	3.48631	0.0217796	up
XUT0921	FALSE	0.804958	0.43022	unchanged	0.801502	0.400017	unchanged	1.73899	0.0531036	unchanged	1.57164	0.357845	unchanged	2.14561	0.176237	unchanged
XUT0922	TRUE	0.684177	0.350704	unchanged	2.38585	0.000131958	up	2.31033	0.000227327	up	2.26602	0.00488438	up	2.71797	0.000430087	up
XUT0923	FALSE	0.939287	0.199366	unchanged	1.17286	0.0888162	unchanged	2.16934	0.000933846	up	0.651128	0.485442	unchanged	1.27115	0.135945	unchanged
XUT0924	FALSE	1.15747	0.334223	unchanged	3.0002	0.00344695	up	2.20888	0.0376659	up	2.52252	0.126969	unchanged	2.08453	0.204742	unchanged
XUT0925	TRUE	2.80499	1.66897e-44	up	2.26097	7.5905e-28	up	3.57559	9.8273e-72	up	2.42596	4.43292e-20	up	3.72323	5.69614e-49	up
XUT0926	TRUE	2.51805	0.000216776	up	3.00871	4.67799e-06	up	3.51696	4.78852e-08	up	2.82298	0.000976688	up	3.44732	2.51899e-05	up
XUT0927	TRUE	0.664737	0.00131599	unchanged	1.78738	2.65606e-20	up	1.93027	1.19651e-23	up	2.10344	4.12832e-19	up	2.45661	1.59327e-26	up
XUT0928	TRUE	0.467524	0.03606	unchanged	1.61077	3.87615e-15	up	1.8491	1.02961e-19	up	1.40692	5.03941e-09	up	1.52129	1.18757e-10	up
XUT0929	TRUE	3.3363	1.06795e-09	up	2.34861	3.78573e-05	up	3.8049	1.22975e-12	up	2.73855	0.00026985	up	4.03219	1.04197e-08	up
XUT0930	TRUE	3.86953	2.39142e-07	up	3.45071	4.21053e-06	up	4.71915	5.99114e-11	up	1.46388	0.0947681	unchanged	2.94237	0.000180376	up
XUT0931	TRUE	3.46619	4.19429e-15	up	2.57866	2.21302e-08	up	3.91773	2.85093e-19	up	2.89378	1.98654e-06	up	4.08179	1.10566e-12	up
XUT0932	TRUE	2.18637	7.40717e-05	up	2.96523	1.99772e-08	up	3.43219	3.84898e-11	up	2.41286	0.00193991	up	3.13319	2.16581e-05	up
XUT0933	TRUE	1.11005	0.000248876	up	1.66859	9.68706e-09	up	1.91778	2.78012e-11	up	1.58398	0.00014296	up	2.09615	1.35081e-07	up
XUT0934	TRUE	1.73111	0.183795	unchanged	2.88841	0.0136987	up	2.83607	0.0159429	up	2.83515	0.0914543	unchanged	2.83787	0.083186	unchanged
XUT0935	TRUE	1.50728	0.413106	unchanged	3.08371	0.0502745	unchanged	3.33556	0.0330615	up	1.08316	0.604725	unchanged	0.968597	0.632111	unchanged
XUT0936	TRUE	0.714341	0.354929	unchanged	1.77145	0.00920868	up	1.43579	0.0389765	up	0.955845	0.320208	unchanged	1.39116	0.121551	unchanged
XUT0937	TRUE	1.75461	0.0206621	up	2.9922	1.91086e-05	up	3.15576	5.72997e-06	up	3.3834	0.000114603	up	3.69538	1.48765e-05	up
XUT0938	TRUE	1.62764	0.0207594	up	2.69138	3.88504e-05	up	2.70388	3.54999e-05	up	2.74786	0.00307579	up	3.51183	6.88697e-05	up
XUT0939	TRUE	1.60286	0.311625	unchanged	2.3605	0.0979704	unchanged	3.1404	0.0229444	up	3.44113	0.169818	unchanged	4.73927	0.039019	up
XUT0940	FALSE	1.04245	0.212156	unchanged	2.91869	5.4877e-05	up	2.24068	0.00266586	up	3.16137	0.00432263	up	3.43922	0.00138542	up
XUT0942	FALSE	1.13063	0.000231081	up	1.95519	2.29041e-11	up	2.03901	2.54279e-12	up	2.33172	1.16484e-09	up	2.66953	6.97622e-13	up
XUT0943	TRUE	2.47107	0.000704769	up	3.43237	6.61219e-07	up	4.23122	3.17164e-10	up	5.51223	0.00051098	up	6.64415	1.84156e-05	up
XUT0944	FALSE	0.876247	0.0944163	unchanged	0.4052	0.44393	unchanged	1.18377	0.0173253	up	1.10823	0.125425	unchanged	1.19079	0.0873511	unchanged
XUT0945	TRUE	1.98669	0.000130395	up	1.40729	0.0085859	up	2.89892	4.21498e-09	up	2.82722	0.000108203	up	2.94107	3.62112e-05	up
XUT0946	TRUE	2.29921	3.50048e-06	up	2.01234	6.11008e-05	up	2.78331	7.94692e-09	up	2.35656	0.00190773	up	2.86097	8.1684e-05	up
XUT0947	TRUE	1.45748	0.0109129	up	1.81891	0.000977938	up	2.58677	1.18959e-06	up	2.63229	0.00274055	up	2.4132	0.00529389	up
XUT0948	TRUE	1.49804	0.001623	up	0.919972	0.0588901	unchanged	2.28854	3.74114e-07	up	2.18217	0.000900777	up	2.55738	5.15851e-05	up
XUT0949	TRUE	1.16008	0.006635	up	1.34224	0.00120516	up	2.09237	1.75899e-07	up	1.43722	0.0137292	up	1.96346	0.00039926	up
XUT0950	TRUE	2.39659	0.000404769	up	1.9277	0.00474032	up	2.77234	2.24867e-05	up	1.7808	0.0445685	up	2.35703	0.00475404	up
XUT0951	TRUE	2.3185	2.83066e-06	up	1.60117	0.0017435	up	2.96655	5.57031e-10	up	1.96865	0.0023316	up	2.4056	9.29365e-05	up
XUT0952	TRUE	2.69131	1.24334e-05	up	2.38403	0.000119945	up	3.60354	9.18562e-10	up	2.9168	0.000216441	up	4.0944	3.34963e-08	up
XUT0953	TRUE	2.79159	2.07946e-32	up	2.42625	1.26096e-23	up	3.33006	1.85862e-45	up	2.68025	6.95592e-19	up	3.51623	1.81584e-33	up
XUT0954	TRUE	3.53501	1.23001e-17	up	3.55411	1.26967e-17	up	4.4582	4.50941e-28	up	3.13676	8.40121e-09	up	4.03404	1.33127e-14	up
XUT0955	TRUE	2.1783	1.54781e-11	up	2.41452	6.32426e-14	up	3.20604	1.7605e-24	up	2.62424	1.5007e-11	up	2.92312	1.0772e-14	up
XUT0957	FALSE	1.05305	0.000147585	up	1.79693	1.25357e-11	up	1.84935	2.75079e-12	up	1.98847	2.20636e-08	up	2.05354	3.31716e-09	up
XUT0958	TRUE	3.15681	2.57873e-09	up	3.75354	5.01909e-13	up	4.43722	3.00315e-18	up	4.04332	1.88191e-09	up	4.81421	2.00085e-13	up
XUT0959	TRUE	2.38186	0.000336974	up	3.08964	1.18372e-06	up	3.64649	4.7995e-09	up	3.05399	0.000785213	up	3.53087	5.61614e-05	up
XUT0960	TRUE	3.57543	1.72124e-09	up	4.7629	1.02031e-16	up	5.46787	4.07264e-22	up	3.19468	3.58983e-07	up	4.41875	1.36087e-13	up
XUT0961	TRUE	3.11371	3.78785e-79	up	2.59553	1.09465e-54	up	3.80158	2.17685e-118	up	2.5398	1.91383e-48	up	3.52562	4.59034e-95	up
XUT0962	TRUE	2.96324	3.63923e-10	up	3.50098	5.46468e-14	up	4.28901	4.14112e-21	up	3.62149	1.18616e-09	up	3.5767	1.24821e-09	up
XUT0963	TRUE	2.1038	0.00166633	up	2.95316	3.11317e-06	up	3.54818	1.08424e-08	up	2.65495	0.000615476	up	3.16488	2.148e-05	up
XUT0964	TRUE	2.0306	3.68716e-09	up	2.74276	3.82631e-16	up	3.20097	4.81304e-22	up	2.56009	1.28669e-09	up	3.25673	9.4462e-16	up
XUT0965	TRUE	1.66059	0.05075	unchanged	2.73472	0.000490998	up	3.37422	1.05836e-05	up	5.99033	0.000128891	up	6.47087	2.79523e-05	up
XUT0966	TRUE	-0.107111	NA	NA	1.89139	0.558991	unchanged	1.31075	0.692058	unchanged	-0.157177	0.967881	unchanged	0.977004	0.73226	unchanged
XUT0967	TRUE	3.19675	1.29379e-09	up	3.25272	6.38544e-10	up	4.10584	9.39073e-16	up	3.28501	2.27805e-06	up	4.06986	1.08558e-09	up
XUT0968	TRUE	1.51599	0.000305545	up	1.9292	2.20221e-06	up	2.26744	1.56241e-08	up	2.66135	1.30944e-05	up	2.5842	1.76113e-05	up
XUT0969	TRUE	2.48075	3.76485e-05	up	3.14323	5.88906e-08	up	3.22325	2.37117e-08	up	2.32712	0.000945931	up	2.3199	0.00072888	up
XUT0970	FALSE	0.808761	0.689406	unchanged	3.08429	0.0519009	unchanged	2.95678	0.064592	unchanged	1.6008	0.458408	unchanged	1.99044	0.326847	unchanged
XUT0971	TRUE	1.97931	0.00116654	up	3.13441	4.07415e-08	up	3.02835	1.26779e-07	up	2.0703	0.00845181	up	2.4306	0.0012782	up
XUT0973	TRUE	2.94707	2.76173e-08	up	3.17348	1.52474e-09	up	3.6805	9.16487e-13	up	3.26555	3.16513e-05	up	3.91414	2.19183e-07	up
XUT0974	TRUE	3.94668	1.10264e-19	up	3.61379	2.84676e-16	up	4.77519	6.7001e-29	up	2.24196	0.000300034	up	3.9776	1.50027e-12	up
XUT0976	TRUE	-0.144487	0.92006	unchanged	2.51206	0.011952	up	2.08038	0.041922	up	3.65811	0.0798881	unchanged	3.95964	0.051118	unchanged
XUT0977	TRUE	2.52111	7.12898e-06	up	6.03398	1.8834e-32	up	6.39605	6.93864e-37	up	5.36246	1.75348e-16	up	5.6829	1.18378e-18	up
XUT0978	FALSE	1.21482	0.141509	unchanged	2.33735	0.00179858	up	2.18961	0.00373034	up	1.26004	0.207601	unchanged	1.27918	0.18675	unchanged
XUT0980	TRUE	2.87851	0.0384355	up	4.75251	0.000164726	up	5.07019	5.15188e-05	up	4.61123	0.00982914	up	5.06731	0.00369081	up
XUT0981	TRUE	1.53991	0.0156165	up	2.6062	1.10181e-05	up	3.02534	2.13444e-07	up	1.68303	0.0689689	unchanged	2.66176	0.0017925	up
XUT0982	TRUE	1.90912	5.49453e-11	up	2.27874	3.51742e-15	up	2.56392	3.1637e-19	up	2.05908	3.12481e-09	up	2.40332	7.75725e-13	up
XUT0983	FALSE	0.20011	0.852211	unchanged	1.85983	0.0242931	up	1.46235	0.0842735	unchanged	2.35911	0.071384	unchanged	2.51356	0.0467768	up
XUT0984	FALSE	0.417875	0.631866	unchanged	0.846379	0.269497	unchanged	0.272708	0.737242	unchanged	0.817836	0.467386	unchanged	0.660409	0.54724	unchanged
XUT0986	TRUE	2.4531	5.53727e-25	up	2.64081	4.55418e-28	up	2.92962	6.23428e-35	up	2.76184	1.98101e-18	up	3.38874	1.12697e-28	up
XUT0987	TRUE	3.57575	4.62206e-15	up	4.05851	2.89194e-19	up	5.1175	5.40338e-31	up	3.98855	9.43182e-13	up	5.20044	6.42124e-22	up
XUT0988	TRUE	3.69768	1.62635e-47	up	2.72625	1.31876e-24	up	3.61867	1.27239e-44	up	3.8223	4.74479e-26	up	4.40127	1.8043e-35	up
XUT0989	TRUE	1.57742	0.0011724	up	1.09111	0.0273623	up	1.8479	9.02821e-05	up	1.92192	0.0117576	up	2.16652	0.00301978	up
XUT0990	TRUE	2.17804	0.0110642	up	4.84243	2.076e-10	up	4.48009	4.96726e-09	up	5.12657	5.17067e-07	up	5.18125	3.01911e-07	up
XUT0991	FALSE	0.60239	0.432341	unchanged	1.85353	0.0051631	up	1.63851	0.0147358	up	3.2171	0.005163	up	3.82113	0.000569546	up
XUT0992	FALSE	0.766143	0.283277	unchanged	2.49621	4.711e-05	up	2.24535	0.000298496	up	1.25915	0.162961	unchanged	1.45875	0.091004	unchanged
XUT0993	TRUE	1.56352	0.0340225	up	1.48967	0.0384571	up	1.61671	0.0239557	up	2.29811	0.012907	up	2.15477	0.017433	up
XUT0994	TRUE	1.80091	0.000211753	up	1.74317	0.000313108	up	2.40635	2.5823e-07	up	1.53185	0.0195991	up	2.31436	0.00015836	up
XUT0995	TRUE	0.320875	0.607173	unchanged	1.15095	0.0313633	up	1.23962	0.0203996	up	0.654146	0.42282	unchanged	0.553243	0.485709	unchanged
XUT0996	TRUE	3.32151	0.00230571	up	2.54552	0.0201246	up	4.20063	4.29751e-05	up	3.61716	0.055216	unchanged	4.72559	0.00841497	up
XUT0997	TRUE	2.17514	4.31357e-06	up	3.20247	1.49446e-12	up	3.41921	2.63215e-14	up	2.77136	6.62453e-06	up	3.68132	3.42598e-10	up
XUT0999	TRUE	2.73411	4.60029e-43	up	2.66455	4.59532e-40	up	3.65804	9.01356e-77	up	2.88859	6.05974e-40	up	3.77058	1.80492e-70	up
XUT1000	TRUE	3.02502	0.0215726	up	5.19149	1.35449e-05	up	5.71853	1.30627e-06	up	3.07149	0.0306933	up	5.18726	7.64946e-05	up
XUT1002	TRUE	1.40456	0.018295	up	1.97026	0.000499693	up	1.94056	0.000626914	up	2.39253	0.00182318	up	3.38623	2.63383e-06	up
XUT1003	FALSE	0.271041	0.605025	unchanged	1.33373	0.00268367	up	1.69033	0.000106332	up	1.87975	0.00241448	up	1.74926	0.00398514	up
XUT1005	FALSE	0	NA	NA	4.11133	0.403416	unchanged	4.2478	0.388633	unchanged	0	1	unchanged	4.1364	0.34078	unchanged
XUT1007	FALSE	-0.272534	0.79014	unchanged	0.796765	0.340355	unchanged	-0.11685	0.89973	unchanged	0.347956	0.794705	unchanged	-0.171528	0.896445	unchanged
XUT1008	FALSE	0.0110095	0.995181	unchanged	2.20808	0.0310704	up	2.71942	0.00676262	up	2.02781	0.155214	unchanged	2.17593	0.113732	unchanged
XUT1009	TRUE	0.740281	0.273177	unchanged	2.46649	2.10498e-05	up	2.85755	5.58246e-07	up	2.79133	0.000900443	up	3.03382	0.000197734	up
XUT1011	TRUE	2.20674	0.018255	up	2.30271	0.0113478	up	3.42902	7.4553e-05	up	3.29446	0.0217516	up	4.12718	0.00262919	up
XUT1012	TRUE	2.5731	3.97569e-08	up	2.12594	9.44836e-06	up	2.98219	9.03288e-11	up	2.9731	1.71701e-05	up	4.13578	2.39694e-10	up
XUT1013	TRUE	2.25666	1.57013e-14	up	2.96485	1.80285e-24	up	3.54512	1.95888e-35	up	2.84337	1.03188e-14	up	3.34666	6.71771e-21	up
XUT1014	TRUE	2.053	2.7741e-11	up	2.78922	3.1036e-20	up	3.07302	1.13189e-24	up	3.07526	8.06875e-17	up	3.18532	1.61941e-18	up
XUT1015	FALSE	1.97872	0.00846319	up	2.68954	0.000157927	up	3.09064	1.02912e-05	up	1.89539	0.0297391	up	2.65126	0.00118785	up
XUT1017	TRUE	1.06418	0.133974	unchanged	1.84003	0.00490587	up	2.39127	0.000181619	up	1.09425	0.240196	unchanged	1.59571	0.0666945	unchanged
XUT1018	FALSE	0.720108	0.305371	unchanged	1.33473	0.0358174	up	1.04335	0.108401	unchanged	2.30776	0.00292633	up	1.62356	0.0377863	up
XUT1019	TRUE	2.68278	3.31969e-08	up	2.23432	6.2362e-06	up	2.90352	1.3837e-09	up	0.939625	0.153183	unchanged	1.81155	0.00254922	up
XUT1020	FALSE	0.473755	0.428546	unchanged	1.68148	0.00115491	up	1.70136	0.00101804	up	1.83941	0.00986696	up	1.38242	0.0515424	unchanged
XUT1021	TRUE	1.49865	0.112648	unchanged	1.22279	0.182396	unchanged	1.21083	0.188732	unchanged	0.722411	0.504564	unchanged	0.347569	0.747995	unchanged
XUT1022	TRUE	3.02049	5.48914e-28	up	2.6206	3.22991e-20	up	3.84644	5.36714e-45	up	2.88777	7.21961e-13	up	4.01552	1.16505e-25	up
XUT1023	TRUE	5.09134	NA	NA	4.5116	0.0318796	up	4.95863	0.0165977	up	4.06553	0.0724832	unchanged	5.24428	0.0132391	up
XUT1024	TRUE	2.52367	0.0410097	up	2.48494	0.037715	up	3.18711	0.00599399	up	1.11914	0.575346	unchanged	3.64634	0.0254073	up
XUT1025	TRUE	2.57767	0.0528792	unchanged	2.06906	0.115848	unchanged	3.17115	0.0111224	up	2.60409	0.243937	unchanged	3.86078	0.0626835	unchanged
XUT1026	TRUE	3.51243	1.4491e-13	up	2.3953	1.52776e-06	up	3.8405	2.89364e-16	up	2.10048	0.000371986	up	3.05755	3.31989e-08	up
XUT1027	TRUE	2.57384	0.00343173	up	1.77745	0.0480763	up	3.12702	0.0001892	up	1.35128	0.294551	unchanged	3.34872	0.00225911	up
XUT1028	TRUE	3.11957	3.18833e-16	up	2.15337	6.85477e-08	up	3.35647	1.0247e-18	up	2.03176	2.82203e-06	up	2.81894	5.4885e-12	up
XUT1029	FALSE	0.205496	0.844401	unchanged	1.18988	0.157329	unchanged	0.760159	0.384431	unchanged	1.85335	0.164692	unchanged	1.80417	0.164726	unchanged
XUT1030	TRUE	2.77004	3.90051e-10	up	3.20301	2.50714e-13	up	3.89165	9.43568e-20	up	3.63103	1.632e-08	up	4.2615	8.62951e-12	up
XUT1031	FALSE	0.409244	0.509586	unchanged	1.96166	0.000163486	up	1.82181	0.000516489	up	2.10832	0.00479468	up	2.33662	0.00118412	up
XUT1032	TRUE	1.76169	0.0110401	up	3.6641	4.89751e-09	up	3.34968	1.16669e-07	up	4.08876	1.41585e-06	up	4.69966	1.27276e-08	up
XUT1033	FALSE	-0.388238	0.732084	unchanged	0.466284	0.629105	unchanged	0.565422	0.555737	unchanged	-1.10786	0.562133	unchanged	-0.114429	0.949016	unchanged
XUT1034	TRUE	3.10868	2.29454e-13	up	3.18893	7.04928e-14	up	4.3382	5.83752e-26	up	3.00813	4.01425e-07	up	3.90409	5.50659e-12	up
XUT1036	TRUE	1.86483	2.37889e-18	up	3.55818	1.41668e-65	up	3.85202	1.51866e-77	up	3.34725	1.71637e-45	up	3.89703	2.65418e-63	up
XUT1037	FALSE	1.27521	0.0900704	unchanged	3.86922	1.95562e-09	up	3.68211	1.29485e-08	up	4.95138	5.77298e-05	up	5.33957	1.03256e-05	up
XUT1038	TRUE	2.17966	3.59293e-14	up	2.44717	1.55133e-17	up	3.03299	5.61639e-27	up	2.58059	7.26031e-15	up	2.94039	7.92049e-20	up
XUT1039	TRUE	0.901952	0.131211	unchanged	1.81158	0.000930563	up	2.06805	0.000130426	up	1.42469	0.110724	unchanged	2.49086	0.00221802	up
XUT1040	TRUE	2.10103	4.29459e-06	up	2.55331	1.104e-08	up	2.86032	8.56085e-11	up	2.82987	1.67683e-06	up	3.57115	2.71776e-10	up
XUT1041	TRUE	1.82705	1.45467e-06	up	2.62908	7.59046e-13	up	3.43742	5.51844e-22	up	3.24073	2.53738e-08	up	3.94948	1.79564e-12	up
XUT1042	TRUE	2.04915	0.00146391	up	2.60939	2.34695e-05	up	2.83724	3.42654e-06	up	3.01785	0.000599877	up	3.80272	5.8496e-06	up
XUT1043	TRUE	5.03037	0.00644682	up	6.75081	7.70248e-05	up	6.72947	7.97391e-05	up	4.77311	0.0181015	up	6.05344	0.0015811	up
XUT1044	TRUE	1.15422	0.0731542	unchanged	2.76297	1.65515e-06	up	2.71582	2.59427e-06	up	2.93825	0.000263117	up	3.42503	1.00562e-05	up
XUT1045	TRUE	0.799916	0.369712	unchanged	2.51358	0.000888131	up	2.60486	0.000550588	up	2.39429	0.0264386	up	2.67775	0.010002	up
XUT1046	TRUE	2.52917	5.53082e-10	up	2.82761	2.89548e-12	up	3.40342	9.4276e-18	up	3.40545	8.06394e-12	up	3.33282	1.21746e-11	up
XUT1047	TRUE	0.873926	0.264122	unchanged	2.11633	0.00220278	up	1.99431	0.00419319	up	2.11229	0.0211129	up	2.90754	0.000728294	up
XUT1048	FALSE	0.596426	0.541856	unchanged	3.19186	3.93657e-05	up	2.50448	0.00171259	up	2.54641	0.024761	up	2.83772	0.0094911	up
XUT1049	FALSE	0.979034	0.134101	unchanged	1.53025	0.012123	up	1.91847	0.00133182	up	2.34238	0.00232253	up	2.36529	0.00158682	up
XUT1050	FALSE	0.94825	0.424249	unchanged	1.99611	0.0542655	unchanged	2.10039	0.0425083	up	2.94454	0.0874362	unchanged	3.07891	0.0658888	unchanged
XUT1051	TRUE	2.33357	3.23568e-05	up	2.48691	6.70969e-06	up	3.22357	1.77151e-09	up	2.45554	0.000450644	up	3.28573	6.93097e-07	up
XUT1052	TRUE	2.54477	7.64459e-11	up	3.50167	4.28178e-20	up	3.76368	2.16839e-23	up	3.14297	2.31888e-09	up	3.88943	1.65013e-14	up
XUT1053	FALSE	0.574789	0.191967	unchanged	2.56229	1.30805e-11	up	2.45156	1.0999e-10	up	2.4515	5.53116e-07	up	2.80823	2.96685e-09	up
XUT1054	TRUE	1.1402	0.0214044	up	2.69738	1.97458e-09	up	2.96257	2.74503e-11	up	3.06666	1.14739e-06	up	3.37634	3.57396e-08	up
XUT1056	TRUE	1.85564	4.79175e-05	up	1.93326	1.9433e-05	up	2.54091	7.0659e-09	up	2.21681	0.000127569	up	2.98863	4.40624e-08	up
XUT1057	TRUE	1.63539	6.16344e-08	up	1.97263	3.88795e-11	up	2.34981	1.27338e-15	up	2.15875	2.77138e-08	up	2.58898	4.06921e-12	up
XUT1058	TRUE	1.58897	0.000291646	up	3.06577	5.48333e-14	up	3.08964	3.07075e-14	up	2.72492	2.33865e-06	up	3.16251	1.32097e-08	up
XUT1059	TRUE	2.35343	0.0287605	up	4.23768	1.31551e-05	up	4.35429	6.95893e-06	up	5.43048	0.0011094	up	5.2317	0.00154266	up
XUT1060	FALSE	0.929639	0.236038	unchanged	2.18592	0.00167103	up	2.20477	0.0015311	up	2.0776	0.0502582	unchanged	2.25719	0.0271514	up
XUT1061	FALSE	-0.0958375	0.893463	unchanged	1.58163	0.00325411	up	1.58327	0.00328167	up	1.15055	0.254162	unchanged	1.22974	0.209028	unchanged
XUT1063	TRUE	1.5245	0.000211343	up	3.83013	7.65456e-25	up	3.75948	4.47155e-24	up	3.83908	3.32234e-14	up	3.95681	2.11557e-15	up
XUT1064	TRUE	2.07274	9.5051e-06	up	2.67694	3.78224e-09	up	2.91629	8.47853e-11	up	2.88043	2.4981e-06	up	3.20334	6.47988e-08	up
XUT1065	FALSE	0.294992	0.635484	unchanged	1.7295	0.000769096	up	1.73172	0.000770219	up	1.94383	0.00484247	up	2.13121	0.00136193	up
XUT1068	TRUE	2.01938	6.4158e-08	up	2.95896	2.67155e-16	up	3.3578	4.17807e-21	up	4.00637	1.7013e-13	up	4.43092	9.11282e-17	up
XUT1069	FALSE	1.82182	0.00189884	up	2.5043	7.58529e-06	up	3.40863	2.95185e-10	up	3.34147	3.80778e-07	up	3.1658	1.14997e-06	up
XUT1070	TRUE	1.33618	0.0327691	up	2.85707	4.89067e-07	up	2.84372	5.5939e-07	up	2.62037	0.00107861	up	2.53067	0.00128675	up
XUT1071	TRUE	1.87651	0.00156877	up	3.08644	2.59911e-08	up	2.68695	1.80926e-06	up	3.64697	2.57833e-10	up	3.95661	2.45198e-12	up
XUT1072	TRUE	1.86502	0.0138742	up	1.28539	0.0932836	unchanged	2.39077	0.000900708	up	0.813038	0.513113	unchanged	2.45983	0.0209724	up
XUT1073	TRUE	1.43762	0.362058	unchanged	2.17399	0.12339	unchanged	1.95226	0.173428	unchanged	2.07799	0.200456	unchanged	2.11761	0.177549	unchanged
XUT1074	TRUE	1.78014	0.376547	unchanged	4.11883	0.0174068	up	4.46134	0.0098056	up	3.94341	0.00404216	up	4.54325	0.000639447	up
XUT1075	TRUE	2.91012	0.0249321	up	2.56645	0.0422851	up	3.46464	0.0045867	up	3.60686	0.104656	unchanged	2.9978	0.177184	unchanged
XUT1076	TRUE	1.66232	0.389467	unchanged	3.26367	0.0488585	up	3.54702	0.0311865	up	4.47058	0.0569651	unchanged	3.95224	0.0908871	unchanged
XUT1077	TRUE	4.28835	0.0227583	up	4.12532	0.0217223	up	4.1282	0.0217392	up	2.45284	0.171722	unchanged	2.76057	0.108425	unchanged
XUT1078	TRUE	3.39881	0.0304789	up	3.39889	0.0236866	up	3.74993	0.0116221	up	1.03963	0.585241	unchanged	2.41338	0.149504	unchanged
XUT1079	TRUE	2.51547	2.18764e-19	up	2.69021	1.25215e-21	up	3.55211	2.81114e-38	up	3.92563	1.60362e-26	up	3.7522	9.81456e-25	up
XUT1080	TRUE	3.68263	1.54597e-12	up	3.1398	3.64658e-09	up	4.27619	6.04155e-17	up	3.45838	8.397e-06	up	5.00915	9.19255e-12	up
XUT1081	TRUE	1.51115	0.091325	unchanged	2.30134	0.00557163	up	2.65885	0.0011552	up	5.134	0.00257944	up	5.03397	0.00281082	up
XUT1083	FALSE	0.583252	0.514	unchanged	0.867161	0.280841	unchanged	0.0776751	0.931096	unchanged	0.894534	0.466209	unchanged	0.678568	0.572556	unchanged
XUT1084	FALSE	1.37502	0.0122129	up	2.91127	6.6152e-09	up	2.92309	5.62287e-09	up	2.1695	0.00189069	up	3.12643	1.87127e-06	up
XUT1085	TRUE	2.21743	1.2506e-07	up	1.90086	8.4621e-06	up	2.22017	1.18615e-07	up	1.48147	0.00760489	up	2.61223	2.43343e-07	up
XUT1086	TRUE	2.83507	3.1338e-44	up	2.83894	4.48299e-43	up	3.42322	9.01785e-64	up	3.0435	5.26839e-30	up	3.74728	1.02458e-46	up
XUT1087	FALSE	0.845253	0.220003	unchanged	2.4931	3.38822e-05	up	2.39964	7.13286e-05	up	2.41312	0.00343159	up	2.21074	0.00643509	up
XUT1088	FALSE	-0.390322	0.708743	unchanged	0.917247	0.285413	unchanged	0.181547	0.844693	unchanged	2.35713	0.140078	unchanged	1.60963	0.318845	unchanged
XUT1089	FALSE	1.04884	0.0106302	up	1.3184	0.000907459	up	1.2289	0.00212967	up	1.21732	0.0304048	up	1.40339	0.00900387	up
XUT1091	FALSE	0.508091	0.339224	unchanged	1.5816	0.000725627	up	1.3788	0.00363545	up	2.04848	0.00201051	up	1.96155	0.00254245	up
XUT1092	TRUE	3.03289	7.32637e-15	up	2.41692	2.0679e-09	up	3.40446	1.37003e-18	up	2.24062	1.15333e-05	up	3.43142	4.94665e-13	up
XUT1093	TRUE	1.61023	NA	NA	2.54103	0.573973	unchanged	2.29643	0.608145	unchanged	2.50432	0.592564	unchanged	1.89287	0.684783	unchanged
XUT1094	TRUE	1.91943	3.68319e-08	up	2.27755	4.08024e-11	up	2.78908	1.49137e-16	up	2.27719	1.22517e-06	up	2.94527	4.25678e-11	up
XUT1095	TRUE	4.23249	1.46599e-13	up	5.87402	4.59556e-26	up	6.33882	1.23392e-30	up	4.33992	6.45881e-16	up	5.35127	1.87113e-24	up
XUT1096	FALSE	0.363337	0.730881	unchanged	2.00333	0.0174878	up	2.06181	0.0144708	up	1.31535	0.216934	unchanged	1.36654	0.182636	unchanged
XUT1097	TRUE	1.55606	0.147177	unchanged	2.80964	0.00365781	up	3.27624	0.000561836	up	5.29174	0.0052045	up	6.61695	0.00026325	up
XUT1098	TRUE	1.21935	0.0548715	unchanged	2.70772	2.4003e-06	up	2.53768	1.14537e-05	up	1.93	0.00919487	up	2.66042	0.000135537	up
XUT1099	TRUE	0.89505	0.185771	unchanged	1.40117	0.0256347	up	1.7174	0.00545752	up	1.80606	0.0247924	up	2.65358	0.000403151	up
XUT1100	FALSE	NA	NA	NA	NA	NA	NA	NA	NA	NA	NA	NA	NA	NA	NA	NA
XUT1101	TRUE	2.68087	1.3214e-36	up	1.13048	8.11792e-07	up	2.06642	2.77851e-21	up	-0.261318	0.563581	unchanged	1.04076	0.0058892	up
XUT1102	FALSE	-0.323046	0.746603	unchanged	2.33959	0.00160444	up	2.02314	0.00731079	up	2.6162	0.0100517	up	2.90048	0.00312154	up
XUT1103	TRUE	1.52702	0.00161058	up	2.10346	5.88055e-06	up	2.19084	2.14555e-06	up	1.33603	0.0473173	up	2.41712	7.95795e-05	up
XUT1104	TRUE	2.21651	6.13703e-06	up	2.17153	9.60901e-06	up	3.20081	8.33286e-12	up	2.55156	0.000549804	up	3.40767	1.00852e-06	up
XUT1105	TRUE	2.44156	2.00827e-07	up	3.62744	7.56437e-16	up	4.03988	9.49491e-20	up	4.43532	4.86114e-09	up	5.0811	7.46476e-12	up
XUT1106	TRUE	1.78036	0.00311122	up	2.44267	2.16638e-05	up	3.25959	4.35514e-09	up	2.53589	0.00109131	up	3.04319	4.22025e-05	up
XUT1107	TRUE	2.18628	4.54766e-07	up	2.29278	1.10936e-07	up	2.80426	2.93265e-11	up	2.71451	2.38182e-05	up	3.325	6.60462e-08	up
XUT1108	TRUE	2.76584	6.70959e-28	up	2.30406	8.76487e-19	up	3.10716	1.22817e-34	up	3.03259	7.66137e-20	up	3.88618	1.18276e-33	up
XUT1109	FALSE	0.900133	0.0800611	unchanged	1.36525	0.00501905	up	1.66662	0.000499505	up	2.19043	0.00121825	up	1.67335	0.0134431	up
XUT1110	FALSE	0.557702	0.473128	unchanged	2.47947	0.000128618	up	2.2323	0.000651814	up	3.09268	0.000272563	up	2.72928	0.00122698	up
XUT1111	FALSE	0.0577935	0.939117	unchanged	2.26266	1.8219e-05	up	1.61626	0.00300019	up	2.46899	0.0026031	up	2.81175	0.000373636	up
XUT1112	TRUE	2.73123	0.000555203	up	3.4298	5.47169e-06	up	3.46611	4.18642e-06	up	3.45889	0.00319992	up	4.27067	0.000147181	up
XUT1113	TRUE	2.64368	9.88832e-14	up	3.28648	8.20771e-21	up	3.38659	3.12692e-22	up	4.15632	2.3883e-20	up	4.10086	3.25204e-20	up
XUT1114	TRUE	3.04888	9.71398e-25	up	3.07356	1.88105e-24	up	4.06668	8.59045e-44	up	3.7661	3.031e-22	up	4.4904	1.86102e-32	up
XUT1115	FALSE	0.593393	0.327126	unchanged	1.92238	0.000267299	up	2.00324	0.000140056	up	0.632755	0.381478	unchanged	1.82541	0.00440454	up
XUT1116	TRUE	3.06799	2.40121e-05	up	3.69018	1.35213e-07	up	4.46662	6.63992e-11	up	3.32641	6.73509e-05	up	4.14407	2.20203e-07	up
XUT1117	TRUE	0.821726	0.202975	unchanged	2.04103	0.000393861	up	2.39752	2.36246e-05	up	2.84043	0.000141405	up	2.65259	0.000315589	up
XUT1118	TRUE	2.12586	0.006635	up	2.9243	7.6665e-05	up	2.97589	5.4878e-05	up	3.58959	0.000148149	up	3.88764	2.52922e-05	up
XUT1119	TRUE	-1.82087	NA	NA	-0.709027	0.895572	unchanged	-0.737099	0.889549	unchanged	NA	NA	NA	NA	NA	NA
XUT1120	FALSE	NA	NA	NA	NA	NA	NA	NA	NA	NA	NA	NA	NA	NA	NA	NA
XUT1121	TRUE	3.38052	1.45061e-47	up	2.99258	7.78968e-36	up	4.17718	2.61492e-72	up	3.41757	1.50954e-30	up	4.51725	1.27304e-55	up
XUT1122	TRUE	3.00756	9.50062e-13	up	2.67337	5.56597e-10	up	3.84512	1.08412e-20	up	3.06066	2.36418e-08	up	3.73139	1.62446e-12	up
XUT1123	FALSE	1.78233	0.0060081	up	2.44132	7.45449e-05	up	3.02544	5.16372e-07	up	2.82848	6.11366e-05	up	2.87569	3.1458e-05	up
XUT1124	TRUE	2.18634	1.9836e-08	up	2.59597	1.5871e-11	up	3.32386	7.01452e-19	up	3.26866	4.75901e-10	up	3.83794	4.95736e-14	up
XUT1125	TRUE	1.73506	4.90968e-07	up	2.14942	2.41861e-10	up	2.63406	2.29147e-15	up	2.47146	8.09805e-09	up	3.06015	1.0133e-13	up
XUT1126	TRUE	2.28156	7.76718e-21	up	2.25287	1.01492e-19	up	2.71314	7.69399e-29	up	2.34848	1.02612e-14	up	3.0215	3.98667e-25	up
XUT1127	TRUE	3.15215	4.44638e-06	up	2.85948	3.10783e-05	up	3.66625	3.48389e-08	up	2.15153	0.0140016	up	3.26771	5.45012e-05	up
XUT1128	TRUE	2.66643	2.52314e-07	up	2.48248	1.83301e-06	up	3.28254	6.51707e-11	up	2.58124	8.36177e-05	up	3.58108	6.66571e-09	up
XUT1129	TRUE	2.46216	1.1985e-06	up	2.25167	1.01944e-05	up	2.98615	1.40833e-09	up	2.57379	3.72715e-05	up	3.06138	3.18246e-07	up
XUT1130	TRUE	1.23322	0.0404593	up	2.23557	6.18549e-05	up	2.10523	0.000180034	up	2.58535	0.000877844	up	2.77778	0.000224383	up
XUT1131	TRUE	1.55023	0.000499806	up	1.85303	2.04286e-05	up	2.23008	1.69955e-07	up	1.8553	0.00247245	up	2.20322	0.000165408	up
XUT1132	TRUE	4.46512	5.11262e-09	up	0.954868	0.319767	unchanged	4.25448	1.65046e-08	up	2.25002	0.0533054	unchanged	3.04553	0.0049137	up
XUT1133	FALSE	1.6891	0.000524218	up	0.84437	0.094505	unchanged	1.68264	0.000439601	up	0.812036	0.246145	unchanged	0.805876	0.230798	unchanged
XUT1134	TRUE	2.67727	1.2988e-39	up	2.16871	2.30503e-25	up	3.20154	5.42189e-56	up	2.97847	2.82711e-35	up	3.57828	1.42766e-52	up
XUT1135	FALSE	0.158075	0.912793	unchanged	2.30209	0.029087	up	1.06857	0.348871	unchanged	2.61294	0.0591156	unchanged	1.2967	0.370515	unchanged
XUT1136	TRUE	1.87258	1.64822e-06	up	2.48921	5.66022e-11	up	2.54807	1.71904e-11	up	2.25749	6.3619e-06	up	2.61179	5.76691e-08	up
XUT1137	TRUE	1.77379	2.45993e-07	up	2.10141	6.1652e-10	up	2.46302	1.68938e-13	up	1.85758	2.22588e-05	up	2.3461	1.88814e-08	up
XUT1138	FALSE	0.829447	0.000150003	unchanged	1.01988	1.62969e-06	up	1.08504	3.21848e-07	up	1.6451	7.87497e-10	up	1.35855	3.21145e-07	up
XUT1139	TRUE	1.88896	6.78058e-13	up	3.05573	1.03353e-32	up	3.26023	1.23847e-37	up	3.12989	6.8727e-22	up	3.62025	5.40805e-30	up
XUT1140	TRUE	2.19805	0.000110315	up	2.9713	4.67108e-08	up	3.56689	2.10734e-11	up	2.46556	0.00178513	up	3.16466	2.26223e-05	up
XUT1141	FALSE	1.01516	0.0191657	up	2.14192	9.34615e-08	up	2.12319	1.25234e-07	up	1.33336	0.0100575	up	2.01426	3.21617e-05	up
XUT1142	FALSE	1.91458	0.00364911	up	2.76426	8.81873e-06	up	2.82045	5.49538e-06	up	2.0136	0.00941639	up	2.89275	6.67682e-05	up
XUT1143	TRUE	2.21216	0.296203	unchanged	3.84545	0.0367274	up	4.37234	0.0160809	up	4.33993	0.0171767	up	4.96773	0.00503983	up
XUT1144	FALSE	1.2722	0.0973738	unchanged	1.88079	0.00886897	up	2.15404	0.00238365	up	1.94325	0.023921	up	1.62158	0.0564834	unchanged
XUT1146	TRUE	1.50114	0.0100844	up	1.26191	0.0303004	up	1.86049	0.000924266	up	2.29406	0.00703289	up	2.76251	0.000664879	up
XUT1147	TRUE	1.60205	0.134811	unchanged	3.01352	0.00168152	up	2.99378	0.00183836	up	3.02691	0.051809	unchanged	3.47989	0.0199532	up
XUT1148	TRUE	1.08153	0.00679638	up	2.45303	2.49054e-11	up	2.6883	1.48928e-13	up	3.30876	5.67982e-10	up	3.52831	1.53295e-11	up
XUT1149	FALSE	0.758548	0.166537	unchanged	1.71698	0.000570744	up	1.64196	0.00104772	up	2.65945	0.000204016	up	1.8567	0.0104905	up
XUT1150	TRUE	2.92805	1.34288e-29	up	2.68447	4.73316e-24	up	3.46104	8.3587e-41	up	2.81778	1.15973e-17	up	3.74307	2.61319e-32	up
XUT1153	FALSE	1.02873	0.102418	unchanged	1.93666	0.000843587	up	2.4388	1.75547e-05	up	2.49719	0.000305939	up	2.58345	0.000128767	up
XUT1154	FALSE	0.32772	0.748882	unchanged	2.06837	0.0108358	up	1.95669	0.0167985	up	1.75415	0.179925	unchanged	1.34147	0.302239	unchanged
XUT1155	TRUE	2.33053	0.00630917	up	3.25975	4.8435e-05	up	3.97952	3.69867e-07	up	1.47797	0.191714	unchanged	2.59689	0.0117505	up
XUT1156	TRUE	1.60871	0.000273575	up	2.36753	2.10936e-08	up	2.59014	5.96081e-10	up	2.46723	1.08097e-05	up	2.8148	1.91384e-07	up
XUT1158	TRUE	2.34748	2.33514e-13	up	1.8899	1.24468e-08	up	2.89173	6.88853e-20	up	2.40994	8.41856e-09	up	2.91563	4.72945e-13	up
XUT1159	TRUE	1.38994	0.0773678	unchanged	2.16352	0.00312103	up	1.97476	0.00765431	up	1.9017	0.081177	unchanged	2.70263	0.00784507	up
XUT1160	TRUE	1.57423	0.0588635	unchanged	3.0088	6.85016e-05	up	3.16365	2.55937e-05	up	4.32008	0.00118928	up	4.49405	0.000599037	up
XUT1161	TRUE	1.04238	0.283836	unchanged	2.7368	0.00109484	up	2.5533	0.00254018	up	3.0332	0.00901766	up	3.25492	0.00391337	up
XUT1162	TRUE	1.48876	6.21464e-06	up	2.44268	1.0015e-14	up	2.33979	1.46995e-13	up	2.71198	2.76525e-08	up	2.71139	1.47611e-08	up
XUT1163	TRUE	1.92189	0.000463469	up	2.79939	7.96815e-08	up	3.04976	3.4278e-09	up	2.6843	0.000945826	up	3.50826	5.1701e-06	up
XUT1164	FALSE	NA	NA	NA	NA	NA	NA	NA	NA	NA	NA	NA	NA	NA	NA	NA
XUT1165	TRUE	2.57619	4.19173e-05	up	1.34016	0.0478993	up	3.37481	1.98089e-08	up	1.26999	0.146824	unchanged	2.42893	0.00201783	up
XUT1166	TRUE	2.90904	6.71556e-10	up	1.54699	0.00213252	up	3.00488	1.24178e-10	up	3.43887	2.56778e-07	up	4.17459	9.50031e-11	up
XUT1167	TRUE	5.47552	0.00370287	up	5.68478	0.00159369	up	6.61374	0.000179668	up	0	1	unchanged	5.27849	0.0187367	up
XUT1168	TRUE	1.1672	0.0847507	unchanged	1.29436	0.0474139	up	1.9051	0.00252344	up	1.35693	0.153207	unchanged	1.71091	0.0567422	unchanged
XUT1169	TRUE	3.0471	6.03841e-05	up	3.17182	2.00985e-05	up	4.05393	1.86021e-08	up	2.47161	0.0485849	up	4.26246	0.000179672	up
XUT1170	TRUE	3.50185	1.54241e-12	up	3.77437	1.61652e-14	up	4.54767	3.77932e-21	up	3.13392	8.57462e-07	up	3.76717	8.62948e-10	up
XUT1171	TRUE	1.85157	0.0334765	up	2.0467	0.015105	up	3.0743	0.000128974	up	1.9014	0.0628224	unchanged	2.10357	0.0322211	up
XUT1172	TRUE	1.0515	0.345126	unchanged	1.99006	0.0440293	up	1.92054	0.0536972	unchanged	2.4442	0.155861	unchanged	3.31289	0.040119	up
XUT1173	TRUE	1.70231	9.74059e-06	up	1.62727	2.3636e-05	up	2.19604	4.32808e-09	up	2.07557	0.000528119	up	2.72825	1.41226e-06	up
XUT1174	TRUE	1.97018	0.157054	unchanged	3.45209	0.00549476	up	3.63015	0.00332596	up	3.00061	0.141543	unchanged	4.24564	0.0261882	up
XUT1176	TRUE	1.45868	0.00015257	up	2.46017	1.59399e-11	up	2.71128	5.83939e-14	up	2.30248	3.27253e-06	up	3.05502	7.99419e-11	up
XUT1177	TRUE	2.10893	7.89574e-12	up	2.53858	1.19582e-16	up	2.73567	2.12582e-19	up	2.60149	9.01349e-11	up	3.25318	3.30808e-17	up
XUT1178	TRUE	0.547483	0.478695	unchanged	2.6806	2.36813e-05	up	2.39756	0.000189042	up	2.14116	0.0195728	up	3.02148	0.00044141	up
XUT1179	TRUE	2.12587	0.00357917	up	2.31267	0.0011337	up	3.45754	3.36522e-07	up	2.4944	0.00596705	up	3.22491	0.000173706	up
XUT1180	TRUE	1.30348	0.232096	unchanged	2.25912	0.0217026	up	2.87553	0.00267309	up	3.48739	0.0160502	up	3.99544	0.00428458	up
XUT1181	TRUE	1.91317	5.9835e-09	up	2.43664	5.73153e-14	up	2.85395	3.45611e-19	up	3.17414	3.31407e-14	up	3.70173	8.73331e-20	up
XUT1182	TRUE	3.27639	0.000435965	up	2.61495	0.00533947	up	4.35477	7.08667e-07	up	1.91347	0.0597226	unchanged	2.6584	0.00538306	up
XUT1185	TRUE	4.16536	3.05693e-14	up	3.35924	2.16473e-09	up	4.99794	1.11887e-20	up	3.94913	6.33584e-09	up	4.38126	4.35315e-11	up
XUT1186	TRUE	2.27629	2.9796e-05	up	1.4303	0.0121443	up	2.82767	7.77824e-08	up	2.93541	0.000839539	up	3.89627	2.83514e-06	up
XUT1187	TRUE	1.85115	0.304309	unchanged	3.69491	0.0173468	up	3.83719	0.0132574	up	1.61217	0.279615	unchanged	2.29609	0.0988554	unchanged
XUT1188	TRUE	1.38721	0.279322	unchanged	3.02982	0.00651939	up	2.8513	0.0111561	up	2.63533	0.0338762	up	2.30565	0.0606635	unchanged
XUT1189	TRUE	1.82065	0.198997	unchanged	2.65972	0.0389917	up	1.81582	0.179101	unchanged	2.94065	0.0990104	unchanged	2.39661	0.178108	unchanged
XUT1190	TRUE	1.99973	0.00755213	up	3.35381	1.23477e-06	up	3.5253	2.872e-07	up	2.48748	0.0062622	up	3.20346	0.000202246	up
XUT1191	TRUE	2.618	6.75524e-23	up	3.17411	9.65675e-33	up	3.50082	1.94143e-40	up	3.35438	2.01206e-21	up	3.9818	4.08951e-31	up
XUT1192	TRUE	2.43625	6.04268e-05	up	2.63144	1.02466e-05	up	3.44689	2.23275e-09	up	2.47312	0.0064633	up	3.95319	2.16609e-06	up
XUT1193	TRUE	1.80056	7.24447e-05	up	2.44351	2.09873e-08	up	2.24277	3.42842e-07	up	1.83572	0.000248167	up	1.90534	9.08802e-05	up
XUT1194	TRUE	3.39678	0.104925	unchanged	5.51163	0.00274796	up	6.66985	0.000203238	up	2.23132	0.278061	unchanged	1.67608	0.415904	unchanged
XUT1195	FALSE	0.505549	0.0744268	unchanged	2.21096	2.19176e-18	up	1.99356	4.69203e-15	up	2.45475	1.45665e-12	up	2.85035	2.50071e-17	up
XUT1196	TRUE	1.09634	0.0980316	unchanged	2.47702	3.2711e-05	up	3.28207	1.33403e-08	up	5.51473	3.90107e-06	up	5.48139	3.7567e-06	up
XUT1197	TRUE	3.84304	0.00455796	up	4.70132	0.00022626	up	5.30945	2.47581e-05	up	3.66542	0.00963387	up	4.23714	0.00199073	up
XUT1198	FALSE	0.0916868	0.92708	unchanged	0.496371	0.535661	unchanged	0.539202	0.500768	unchanged	0.433536	0.704105	unchanged	0.549288	0.608823	unchanged
XUT1199	TRUE	2.28417	1.86784e-09	up	3.3429	1.13141e-19	up	3.68689	4.01448e-24	up	2.9627	5.17197e-09	up	3.99987	1.43628e-16	up
XUT1200	TRUE	2.22186	0.00459686	up	3.36698	4.23911e-06	up	3.39698	3.35469e-06	up	2.74218	0.0167513	up	3.39324	0.00189026	up
XUT1201	TRUE	1.4979	7.01529e-06	up	1.61268	1.15579e-06	up	2.054	2.2944e-10	up	1.98683	1.92164e-05	up	2.51041	1.43593e-08	up
XUT1202	TRUE	1.53733	0.000456746	up	2.31089	3.35913e-08	up	2.50394	1.57619e-09	up	2.28855	6.58915e-05	up	2.91691	9.0366e-08	up
XUT1203	TRUE	2.0513	0.0121319	up	2.10402	0.0083842	up	2.93796	0.00012966	up	1.84033	0.0535036	unchanged	2.3454	0.00923447	up
XUT1204	FALSE	0.435907	0.621395	unchanged	1.46584	0.0505038	unchanged	1.36943	0.0703046	unchanged	1.19835	0.277315	unchanged	1.87079	0.0672632	unchanged
XUT1205	TRUE	2.08129	2.4763e-06	up	2.3974	3.58514e-08	up	3.07615	3.47862e-13	up	2.31747	3.75868e-05	up	2.63052	1.17912e-06	up
XUT1206	TRUE	2.63606	1.32523e-07	up	3.06554	4.1927e-10	up	3.76373	4.00961e-15	up	3.24439	5.89758e-06	up	4.32684	2.22455e-10	up
XUT1207	TRUE	1.954	2.44783e-14	up	2.70858	1.03739e-26	up	2.87236	2.73773e-30	up	2.1963	3.30789e-11	up	3.19775	3.0846e-24	up
XUT1208	FALSE	-0.233177	0.73648	unchanged	1.96691	0.000222563	up	1.71786	0.00146727	up	2.70996	0.00135193	up	2.48521	0.00288133	up
XUT1209	TRUE	1.21654	0.0329761	up	2.63776	3.83116e-07	up	2.54395	1.07742e-06	up	2.3392	0.0020311	up	2.89528	6.02157e-05	up
XUT1210	TRUE	0.966345	0.0164596	unchanged	1.39226	0.000315993	up	2.06493	3.28841e-08	up	1.31824	0.0176153	up	1.71838	0.0010796	up
XUT1211	TRUE	1.9826	0.00209105	up	2.68111	1.25964e-05	up	2.94675	1.1986e-06	up	3.48906	0.000189473	up	3.76283	3.59429e-05	up
XUT1212	FALSE	1.47144	0.0988667	unchanged	2.43438	0.00298883	up	2.68402	0.000942874	up	4.16081	0.00203233	up	4.70205	0.000341468	up
XUT1213	TRUE	1.98375	4.62744e-09	up	3.24409	2.38694e-23	up	3.33058	9.05306e-25	up	3.83875	1.49586e-17	up	4.3716	3.03459e-23	up
XUT1214	TRUE	4.78611	0.00749926	up	7.94588	9.45161e-07	up	7.4968	3.89429e-06	up	3.9048	0.00600199	up	4.90041	0.000347163	up
XUT1215	TRUE	2.44119	0.000293819	up	3.45628	6.05187e-08	up	3.71308	4.20893e-09	up	3.8634	0.000441727	up	4.61709	1.3739e-05	up
XUT1216	TRUE	3.27349	5.00532e-13	up	3.99303	3.48195e-19	up	4.57008	2.19045e-25	up	2.9654	3.60033e-07	up	3.9293	1.49447e-12	up
XUT1219	TRUE	1.31284	0.00155445	up	1.90363	1.68698e-06	up	2.17674	2.93005e-08	up	1.35552	0.00722786	up	1.82464	0.000129185	up
XUT1221	FALSE	0.169019	0.808773	unchanged	1.83262	0.000679162	up	2.21676	2.89419e-05	up	1.83142	0.0293033	up	2.38211	0.00284107	up
XUT1222	TRUE	1.58117	0.00879663	up	2.49386	1.10128e-05	up	2.83149	4.06723e-07	up	2.93443	0.000101044	up	3.05079	3.43393e-05	up
XUT1223	FALSE	0.84753	0.403684	unchanged	4.67081	2.21546e-09	up	3.99302	4.69935e-07	up	4.35458	5.28344e-05	up	4.95462	2.50504e-06	up
XUT1224	TRUE	2.4702	0.000685369	up	3.98685	3.73191e-09	up	3.68957	6.12935e-08	up	3.50391	5.4218e-05	up	3.267	0.000145667	up
XUT1225	TRUE	1.1013	0.000147756	up	1.38978	8.91097e-07	up	1.68842	1.4124e-09	up	1.34696	0.000231687	up	1.75017	5.34219e-07	up
XUT1227	TRUE	2.87725	0.0018703	up	3.01788	0.000767785	up	3.49762	7.08132e-05	up	3.05769	0.013152	up	3.76418	0.00137786	up
XUT1228	TRUE	2.1024	4.21438e-06	up	3.32484	1.94984e-14	up	3.55069	1.7299e-16	up	3.36828	1.73252e-09	up	4.10288	3.16497e-14	up
XUT1229	TRUE	2.84863	5.32116e-06	up	4.1356	3.38934e-12	up	4.65369	1.95872e-15	up	4.94968	5.35579e-10	up	5.20113	4.03184e-11	up
XUT1230	TRUE	2.45208	5.43837e-06	up	1.61054	0.00367728	up	2.39	7.21893e-06	up	2.14272	0.000803774	up	2.85625	2.1904e-06	up
XUT1231	TRUE	1.70744	0.000268281	up	3.28485	3.83467e-14	up	3.38871	4.3754e-15	up	3.04663	4.18438e-09	up	3.37821	2.26512e-11	up
XUT1232	TRUE	0.955859	0.240902	unchanged	3.00446	1.64847e-05	up	2.09451	0.00393448	up	1.83101	0.145119	unchanged	3.3305	0.00362383	up
XUT1233	TRUE	2.53869	3.73731e-05	up	3.33601	1.5912e-08	up	3.92948	1.09693e-11	up	3.80024	7.68497e-05	up	4.72417	3.38821e-07	up
XUT1234	TRUE	2.31108	2.28918e-07	up	3.24584	5.24311e-14	up	3.37494	3.42959e-15	up	2.98522	1.00447e-07	up	3.47962	1.29672e-10	up
XUT1235	FALSE	0.886952	0.210139	unchanged	1.86923	0.00342404	up	1.7572	0.00633644	up	2.53968	0.0067472	up	2.25536	0.0148244	up
XUT1236	FALSE	0.606109	0.0835215	unchanged	1.37967	2.15263e-05	up	1.35192	3.28902e-05	up	1.62164	0.000166318	up	1.53913	0.000257396	up
XUT1237	FALSE	-1.12158	NA	NA	0.0416308	0.990566	unchanged	2.04495	0.38893	unchanged	-0.58839	0.921903	unchanged	-1.11189	0.838737	unchanged
XUT1238	TRUE	2.61011	9.12767e-12	up	3.81756	9.5779e-25	up	4.15277	1.26067e-29	up	3.6447	2.73359e-13	up	4.22748	3.41909e-18	up
XUT1240	TRUE	2.47207	1.11604e-26	up	1.05047	2.04489e-05	up	2.56917	1.50663e-28	up	1.08729	0.000277367	up	2.02128	4.01339e-13	up
XUT1241	FALSE	1.28887	0.172437	unchanged	2.15952	0.0122728	up	2.12715	0.0140148	up	1.80876	0.077436	unchanged	1.70411	0.0881694	unchanged
XUT1242	TRUE	2.13716	7.49428e-20	up	2.51507	1.39837e-26	up	3.07617	1.96757e-40	up	2.59957	1.90061e-17	up	3.30308	5.71205e-29	up
XUT1243	TRUE	1.37645	0.000119519	up	2.88963	3.77311e-18	up	2.91849	1.42704e-18	up	2.27229	6.55644e-06	up	2.90487	1.54634e-09	up
XUT1244	TRUE	1.54307	0.134878	unchanged	1.68931	0.0843893	unchanged	2.4198	0.0106169	up	2.82988	0.0676013	unchanged	3.87406	0.00778889	up
XUT1245	TRUE	1.94793	0.0014537	up	3.79412	1.18819e-11	up	4.04274	3.20982e-13	up	4.76194	6.31782e-09	up	4.46206	4.63004e-08	up
XUT1246	FALSE	1.07192	0.0786712	unchanged	3.48781	3.72773e-11	up	3.44413	6.51707e-11	up	2.6152	4.09302e-05	up	2.72782	1.15693e-05	up
XUT1247	FALSE	0.143682	0.850688	unchanged	1.51205	0.0112693	up	1.24455	0.0406575	up	1.78807	0.0399573	up	1.76713	0.0365272	up
XUT1248	TRUE	3.01242	0.00530273	up	5.68522	5.99149e-09	up	5.81103	2.36644e-09	up	4.75088	1.01391e-05	up	4.75032	8.13468e-06	up
XUT1249	TRUE	2.47099	0.123238	unchanged	4.00606	0.00541133	up	4.39041	0.00208813	up	3.61895	0.0226803	up	2.74908	0.0864998	unchanged
XUT1250	TRUE	1.84415	0.105194	unchanged	2.60937	0.0134708	up	3.39181	0.000922125	up	3.74623	0.00937977	up	3.76062	0.00784076	up
XUT1251	TRUE	2.14112	0.000309114	up	2.78073	1.07931e-06	up	3.34316	1.99102e-09	up	3.38307	1.16326e-05	up	3.40745	6.89427e-06	up
XUT1252	TRUE	2.56518	1.05334e-38	up	2.64429	9.84394e-40	up	3.18072	1.36433e-58	up	2.50611	1.54664e-24	up	3.25352	1.00412e-42	up
XUT1253	TRUE	3.00989	5.01202e-42	up	3.04176	1.7294e-41	up	3.94354	9.53922e-72	up	3.07584	4.42296e-27	up	4.28424	7.29478e-55	up
XUT1254	FALSE	0.0291213	0.976793	unchanged	1.55318	0.023694	up	1.52063	0.0275754	up	2.04969	0.0492391	up	2.22436	0.0265402	up
XUT1255	TRUE	2.26627	0.0149822	up	3.3703	0.000101245	up	3.8566	6.21577e-06	up	3.18375	0.000738796	up	4.08616	5.57779e-06	up
XUT1256	FALSE	0.615344	0.380291	unchanged	1.75078	0.00426516	up	2.0929	0.000520273	up	2.17805	0.00464355	up	2.74314	0.000176253	up
XUT1257	TRUE	3.75008	0.000167341	up	4.58383	1.29813e-06	up	4.7949	3.53721e-07	up	3.17826	0.00685239	up	4.44356	6.02353e-05	up
XUT1258	TRUE	1.85634	0.0654488	unchanged	3.3077	0.000292411	up	3.45575	0.000142961	up	3.95332	0.00330598	up	4.8205	0.000205339	up
XUT1259	TRUE	2.05007	NA	NA	2.76215	0.242667	unchanged	3.14487	0.177379	unchanged	2.45881	0.448169	unchanged	3.59154	0.217849	unchanged
XUT1260	TRUE	2.06572	0.0123117	up	1.87849	0.0218611	up	3.03241	8.63413e-05	up	1.61757	0.20734	unchanged	3.35943	0.00293018	up
XUT1261	FALSE	0.927819	0.0298996	unchanged	1.23195	0.00269104	up	1.07708	0.0095241	up	1.21116	0.0537874	unchanged	1.44203	0.0160694	up
XUT1262	TRUE	1.86886	5.69235e-09	up	1.26609	0.00011554	up	2.1313	1.56004e-11	up	1.94366	3.40922e-07	up	1.79111	1.84426e-06	up
XUT1264	FALSE	0.92271	0.140798	unchanged	1.0632	0.0744619	unchanged	1.54002	0.00809553	up	0.864763	0.338315	unchanged	1.92907	0.0165695	up
XUT1265	TRUE	2.61978	0.00255593	up	3.9391	1.10015e-06	up	4.1606	2.17739e-07	up	3.61277	0.000424817	up	4.05191	4.72182e-05	up
XUT1266	TRUE	2.1948	7.69804e-11	up	3.16547	6.46041e-22	up	3.24193	4.05908e-23	up	3.44601	1.81475e-14	up	3.98839	1.09478e-19	up
XUT1267	FALSE	1.05197	0.100907	unchanged	2.65409	3.38339e-06	up	2.7748	1.05256e-06	up	2.37125	0.00145911	up	2.4864	0.000592384	up
XUT1268	FALSE	1.73653	0.0426696	up	2.49858	0.00184169	up	3.13616	6.30067e-05	up	2.58188	0.00163322	up	2.60855	0.00114336	up
XUT1269	FALSE	0.360928	0.401766	unchanged	0.613665	0.119839	unchanged	0.938173	0.0153252	unchanged	0.6677	0.226619	unchanged	0.654895	0.219788	unchanged
XUT1270	TRUE	1.88076	1.7964e-21	up	1.57162	7.67571e-15	up	2.40324	2.33928e-34	up	2.65884	4.71895e-27	up	3.21668	7.91441e-41	up
XUT1271	FALSE	0.366377	0.720934	unchanged	1.73713	0.0365504	up	1.59917	0.0569777	unchanged	1.86518	0.0739445	unchanged	2.00051	0.0466632	up
XUT1272	FALSE	0.649501	0.315455	unchanged	5.0856	1.34348e-24	up	3.48598	1.04084e-11	up	3.01711	0.0167927	up	3.54913	0.00338408	up
XUT1273	FALSE	0.640929	0.523041	unchanged	2.78957	0.000651148	up	2.4787	0.00282151	up	3.36266	0.0127816	up	3.56293	0.00683096	up
XUT1274	TRUE	1.88223	5.14546e-05	up	2.55125	1.24124e-08	up	3.06747	2.6778e-12	up	2.89768	4.91933e-06	up	3.24851	1.29083e-07	up
XUT1275	TRUE	0.107229	0.911312	unchanged	1.70081	0.0180414	up	1.83203	0.0105411	up	2.17863	0.0358792	up	2.50243	0.0119816	up
XUT1276	TRUE	2.49488	6.6828e-13	up	2.68788	9.00416e-15	up	3.61068	1.10253e-26	up	3.05146	7.13154e-11	up	3.61568	1.77237e-15	up
XUT1277	TRUE	3.51427	8.18537e-10	up	3.09052	1.02047e-07	up	4.22437	3.54276e-14	up	3.67378	3.74844e-05	up	4.51901	1.42983e-07	up
XUT1278	TRUE	1.31571	0.0351811	up	2.14751	0.000236018	up	2.13931	0.000254407	up	2.27369	0.00239989	up	3.16215	6.85448e-06	up
XUT1279	FALSE	1.00164	0.00715961	up	1.91691	4.1494e-08	up	1.69975	1.52374e-06	up	1.73667	0.000553546	up	1.29471	0.00986349	up
XUT1280	FALSE	NA	NA	NA	NA	NA	NA	NA	NA	NA	0	1	unchanged	0	1	unchanged
XUT1281	TRUE	3.24659	1.14206e-40	up	3.21829	1.49631e-38	up	4.14069	8.81964e-66	up	3.42862	3.43382e-29	up	4.31737	9.27692e-48	up
XUT1282	FALSE	0.795718	0.345358	unchanged	1.55542	0.0396032	up	1.56336	0.0391368	up	1.31524	0.21087	unchanged	1.45316	0.148752	unchanged
XUT1283	TRUE	2.16093	1.36095e-23	up	2.49417	2.38164e-30	up	3.15292	1.87221e-49	up	2.78964	1.62934e-21	up	3.47185	1.64354e-34	up
XUT1284	TRUE	1.79134	0.00023398	up	3.02858	3.33849e-11	up	3.2471	7.22051e-13	up	2.69889	2.15611e-05	up	3.15978	2.36339e-07	up
XUT1286	TRUE	2.43329	0.0221999	up	4.06438	2.82268e-05	up	4.56889	1.8192e-06	up	4.7867	4.35718e-06	up	4.76042	3.92032e-06	up
XUT1287	TRUE	1.91117	0.000326719	up	3.52001	8.8988e-13	up	3.34786	1.2821e-11	up	3.05287	5.96903e-05	up	3.93342	5.85546e-08	up
XUT1288	TRUE	2.87518	2.5905e-10	up	3.06961	1.32608e-11	up	3.79879	8.36012e-18	up	3.65956	5.04918e-09	up	4.24875	2.79767e-12	up
XUT1289	TRUE	0.955991	0.10348	unchanged	2.92073	1.39021e-08	up	2.60338	5.8637e-07	up	2.34381	0.00325091	up	2.4117	0.00186037	up
XUT1290	FALSE	0.681765	0.275949	unchanged	1.62227	0.00375333	up	1.82796	0.000980272	up	1.09372	0.194406	unchanged	1.96287	0.0109698	up
XUT1291	TRUE	1.86174	0.0149451	up	1.64774	0.0298236	up	2.65818	0.000222161	up	1.0458	0.328857	unchanged	1.43747	0.151197	unchanged
XUT1292	TRUE	3.54016	2.65403e-53	up	3.01643	5.0007e-37	up	4.02155	4.05362e-68	up	2.66239	9.20697e-19	up	4.12732	5.51111e-47	up
XUT1293	TRUE	1.93564	0.173021	unchanged	3.69284	0.00329853	up	2.7032	0.0384796	up	5.07938	0.0130248	up	5.73926	0.00369632	up
XUT1294	FALSE	0.90313	0.0763593	unchanged	1.57934	0.000907559	up	1.73162	0.000251309	up	1.82968	0.0162612	up	2.01045	0.00621317	up
XUT1295	TRUE	1.55673	0.0698503	unchanged	3.13853	4.91044e-05	up	3.08318	6.9013e-05	up	3.68491	0.000368354	up	3.61822	0.000383724	up
XUT1296	FALSE	1.26226	0.0689816	unchanged	2.61367	3.35089e-05	up	2.59284	3.95194e-05	up	2.70303	0.000910532	up	3.07804	9.00765e-05	up
XUT1297	FALSE	1.45551	0.139747	unchanged	2.41744	0.0072958	up	3.06763	0.000467615	up	2.56992	0.0162341	up	2.52286	0.0158052	up
XUT1299	TRUE	0.63036	0.339523	unchanged	2.44346	1.33285e-05	up	2.29455	4.88688e-05	up	3.32654	2.01598e-05	up	3.52866	3.6762e-06	up
XUT1300	TRUE	1.06259	0.0996446	unchanged	2.20928	0.000171584	up	2.1048	0.00037299	up	2.05486	0.00781806	up	2.40439	0.00115684	up
XUT1301	TRUE	1.09037	0.252206	unchanged	2.22368	0.00871979	up	2.51312	0.00274964	up	1.48245	0.22687	unchanged	2.38239	0.0346979	up
XUT1302	TRUE	2.0429	7.4333e-06	up	2.70068	9.51782e-10	up	2.84443	8.75918e-11	up	2.74155	2.70074e-06	up	2.83688	6.76971e-07	up
XUT1303	TRUE	0.842084	0.18319	unchanged	2.01134	0.000391791	up	2.32156	3.27764e-05	up	2.79822	0.000310718	up	3.3658	6.03091e-06	up
XUT1304	TRUE	2.89052	4.39444e-41	up	3.31796	1.01928e-52	up	3.67587	9.81874e-66	up	3.61099	8.26083e-37	up	4.41949	4.67292e-57	up
XUT1305	TRUE	2.47635	NA	NA	3.72959	0.059435	unchanged	4.01455	0.0412636	up	3.47031	0.171979	unchanged	4.245	0.0735743	unchanged
XUT1306	TRUE	1.5091	0.037056	up	2.68662	5.60243e-05	up	3.03234	4.02017e-06	up	2.65218	0.00231929	up	3.02795	0.000307244	up
XUT1307	TRUE	1.79666	4.68415e-05	up	2.40258	1.6384e-08	up	2.98263	8.24735e-13	up	2.26536	2.58903e-05	up	2.68407	2.29106e-07	up
XUT1308	TRUE	3.08411	1.41213e-44	up	2.77366	5.28033e-35	up	3.5058	5.81617e-57	up	2.84511	1.48741e-26	up	3.49185	3.42544e-41	up
XUT1310	FALSE	0.194189	0.814997	unchanged	1.55552	0.0170761	up	1.19866	0.0727416	unchanged	1.74612	0.0398901	up	1.74531	0.0342084	up
XUT1311	TRUE	3.02846	1.9012e-44	up	2.60344	1.29438e-31	up	3.61216	1.49126e-62	up	3.08706	3.68586e-24	up	4.02817	7.30587e-43	up
XUT1312	TRUE	2.07173	0.0261464	up	4.04504	1.39898e-06	up	3.49859	4.01055e-05	up	3.6776	0.00846906	up	4.74109	0.000390337	up
XUT1313	TRUE	1.14797	0.201548	unchanged	3.28901	2.04593e-05	up	2.75997	0.000460943	up	2.8221	0.00781901	up	3.11928	0.00235343	up
XUT1314	TRUE	1.15683	0.00918041	up	2.90073	5.6852e-13	up	2.64687	6.90953e-11	up	2.15724	5.11797e-05	up	3.01041	2.21567e-09	up
XUT1315	TRUE	1.87553	4.17698e-12	up	2.40409	3.3354e-19	up	2.94667	4.24986e-29	up	2.40867	2.45802e-12	up	2.81074	3.11082e-17	up
XUT1316	TRUE	2.2867	8.60367e-07	up	2.50251	5.38582e-08	up	3.24311	3.65152e-13	up	2.66294	6.52026e-05	up	3.0956	1.39341e-06	up
XUT1317	TRUE	0.89268	0.125862	unchanged	3.11236	5.29174e-10	up	2.91084	7.96274e-09	up	3.18359	2.0776e-06	up	3.17549	1.4731e-06	up
XUT1318	FALSE	0.539673	0.439988	unchanged	2.97717	1.64018e-07	up	2.53469	1.17319e-05	up	2.32216	0.00978635	up	3.2137	0.000144458	up
XUT1319	TRUE	2.90474	2.71792e-08	up	2.70811	2.80044e-07	up	3.55154	2.98116e-12	up	3.24705	9.36224e-06	up	3.78141	8.84086e-08	up
XUT1320	TRUE	2.547	0.034427	up	4.08701	0.000201151	up	5.01439	3.12785e-06	up	4.77414	0.00029477	up	4.71905	0.000298472	up
XUT1321	FALSE	0.412379	0.715651	unchanged	2.29132	0.0105953	up	1.4035	0.136675	unchanged	2.35802	0.03101	up	1.29376	0.251644	unchanged
XUT1323	TRUE	1.70595	0.00141	up	2.85612	1.12065e-08	up	2.91377	5.13047e-09	up	3.38654	3.80235e-07	up	3.40395	2.10016e-07	up
XUT1325	TRUE	1.65389	7.69159e-05	up	2.65481	2.32665e-11	up	2.61391	4.81999e-11	up	2.08557	0.000350307	up	2.85729	1.94001e-07	up
XUT1326	TRUE	3.95588	4.17163e-10	up	3.90302	5.94676e-10	up	4.96998	5.15614e-16	up	3.45047	3.04861e-06	up	4.64647	4.36988e-11	up
XUT1327	TRUE	4.52164	0.00691706	up	4.3933	0.00627056	up	6.00018	0.000114272	up	3.3784	0.0712113	unchanged	4.92081	0.00494499	up
XUT1328	TRUE	3.733	0.0517574	unchanged	4.27796	0.0171522	up	4.4016	0.0139833	up	2.03246	0.252689	unchanged	3.15383	0.0530019	unchanged
XUT1329	TRUE	NA	NA	NA	NA	NA	NA	NA	NA	NA	NA	NA	NA	NA	NA	NA
XUT1330	TRUE	1.88617	0.00140481	up	1.36855	0.0225489	up	2.69519	1.45148e-06	up	2.47312	0.0034203	up	2.91697	0.000303783	up
XUT1332	TRUE	3.20402	9.39573e-19	up	2.24346	3.39345e-09	up	3.6309	5.93893e-24	up	1.7182	0.000159199	up	2.55957	1.47811e-09	up
XUT1333	TRUE	1.58166	0.0175796	up	2.41361	0.000114342	up	2.89314	2.44952e-06	up	1.45731	0.109218	unchanged	2.04086	0.0169491	up
XUT1334	TRUE	2.56699	0.0415352	up	3.37704	0.0041028	up	4.02036	0.000487911	up	5.63641	0.00290176	up	6.03311	0.0011018	up
XUT1335	FALSE	0.0669879	0.965215	unchanged	1.0553	0.345575	unchanged	1.29207	0.242479	unchanged	0.487745	0.762983	unchanged	0.969839	0.504741	unchanged
XUT1336	FALSE	-0.209161	0.799397	unchanged	1.61299	0.0110578	up	1.44345	0.0246916	up	1.44124	0.0934806	unchanged	1.35858	0.104246	unchanged
XUT1337	FALSE	0.926015	0.0949269	unchanged	2.18763	1.32296e-05	up	2.01669	6.8917e-05	up	1.85959	0.0144224	up	2.01441	0.00611799	up
XUT1338	TRUE	0.88741	0.0407001	unchanged	2.76158	1.15581e-12	up	2.96608	1.50376e-14	up	3.96163	7.50205e-11	up	3.79697	3.21293e-10	up
XUT1339	TRUE	1.11122	0.00877755	up	2.50919	1.19918e-10	up	2.11905	8.98516e-08	up	2.89038	1.05403e-09	up	2.86225	8.47652e-10	up
XUT1340	TRUE	2.81228	9.41373e-25	up	2.64285	3.97042e-21	up	3.47455	2.74464e-37	up	2.56107	7.61029e-11	up	3.68357	5.90093e-23	up
XUT1341	TRUE	2.46042	4.44588e-18	up	2.84786	1.47068e-23	up	3.40768	3.01562e-34	up	2.69324	4.05171e-13	up	3.31167	2.11053e-20	up
XUT1342	TRUE	2.59234	5.08341e-13	up	2.63748	3.26392e-13	up	3.46978	5.10461e-23	up	3.42745	2.59322e-12	up	3.89575	2.99087e-16	up
XUT1343	TRUE	2.54105	3.63017e-40	up	2.37097	2.75997e-34	up	3.22509	3.29966e-64	up	2.39162	6.4926e-30	up	3.20203	2.32853e-55	up
XUT1344	FALSE	1.36922	0.0412385	up	2.48942	5.75658e-05	up	2.96132	1.10355e-06	up	2.85453	0.00131	up	2.68422	0.00216341	up
XUT1345	TRUE	2.74157	3.92864e-06	up	3.26217	1.64292e-08	up	3.66262	1.22574e-10	up	2.66095	0.00157086	up	3.10451	0.000120691	up
XUT1346	TRUE	1.96338	0.00847413	up	3.21811	3.25579e-06	up	3.33621	1.24775e-06	up	3.1724	0.000425329	up	3.67176	2.3819e-05	up
XUT1347	TRUE	2.92088	0.0921217	unchanged	2.57907	0.124147	unchanged	3.57957	0.0262763	up	1.4847	0.426302	unchanged	1.26027	0.490569	unchanged
XUT1348	TRUE	1.56612	1.15685e-08	up	2.48791	1.02192e-20	up	2.56548	4.08721e-22	up	2.64842	1.02277e-14	up	2.88992	4.78602e-18	up
XUT1349	TRUE	1.06491	0.400637	unchanged	3.38197	0.00128804	up	2.39571	0.0289298	up	2.29238	0.136673	unchanged	2.49662	0.0924231	unchanged
XUT1350	TRUE	3.17555	4.25104e-05	up	2.30284	0.00380799	up	3.77988	3.83201e-07	up	1.35082	0.122898	unchanged	2.07836	0.0103017	up
XUT1352	TRUE	3.41331	3.90066e-15	up	2.56735	1.38836e-08	up	3.81375	7.39223e-19	up	2.79626	1.12392e-05	up	4.23796	1.03113e-12	up
XUT1353	TRUE	3.26108	7.65016e-13	up	3.49698	1.43081e-14	up	4.62754	7.46138e-26	up	3.6706	1.62033e-13	up	4.49419	1.28123e-20	up
XUT1354	TRUE	3.44857	3.70891e-12	up	2.83241	2.75153e-08	up	4.10696	3.06068e-17	up	3.2578	3.94859e-10	up	4.11612	1.98665e-16	up
XUT1355	TRUE	4.73445	7.6373e-13	up	1.83474	0.0159322	up	4.86596	7.40282e-14	up	0.937909	0.244539	unchanged	2.82275	3.2174e-05	up
XUT1356	FALSE	0.0891299	0.957005	unchanged	1.75172	0.127633	unchanged	1.94872	0.0879184	unchanged	4.01671	0.0449889	up	3.47973	0.0814218	unchanged
XUT1357	TRUE	1.13228	0.140046	unchanged	1.88714	0.00773825	up	2.23678	0.00132541	up	2.32303	0.0175625	up	2.60746	0.00555482	up
XUT1358	TRUE	1.05855	0.110282	unchanged	2.64149	7.49454e-06	up	2.78783	1.98306e-06	up	3.25795	0.000214643	up	2.85706	0.00110881	up
XUT1359	TRUE	2.29869	2.04224e-08	up	2.56637	2.94763e-10	up	2.99974	6.06606e-14	up	2.80088	1.87046e-06	up	3.79924	8.58288e-12	up
XUT1360	TRUE	1.61814	0.000260708	up	1.98867	4.00685e-06	up	2.30192	5.93647e-08	up	2.25536	4.75178e-05	up	2.39427	8.46485e-06	up
XUT1361	TRUE	2.59125	5.80537e-06	up	4.86248	4.08348e-20	up	5.36569	1.16994e-24	up	5.69333	1.21427e-14	up	6.06358	1.1158e-16	up
XUT1362	TRUE	3.43442	5.51047e-07	up	3.27586	1.6447e-06	up	4.37657	3.00825e-11	up	4.77331	8.14987e-05	up	5.41139	4.97665e-06	up
XUT1363	TRUE	2.67523	1.14829e-27	up	3.3351	5.69216e-42	up	3.72081	4.38402e-53	up	3.56394	2.6407e-31	up	4.12543	3.48089e-43	up
XUT1364	TRUE	1.50888	0.000317505	up	2.52983	1.71163e-10	up	2.82361	5.26824e-13	up	2.69483	5.35301e-07	up	2.75149	1.79052e-07	up
XUT1365	TRUE	3.1344	8.82334e-07	up	4.05167	4.08024e-11	up	4.5948	2.91528e-14	up	5.18083	1.26826e-09	up	5.46851	8.96808e-11	up
XUT1366	TRUE	3.72426	0.0301157	up	5.71333	0.000267862	up	5.80887	0.000203617	up	7.00177	1.93555e-05	up	8.16943	3.78966e-07	up
XUT1367	FALSE	0.142609	0.748017	unchanged	1.39714	0.000105995	up	1.24515	0.00062327	up	1.31686	0.00609087	up	1.53253	0.000878409	up
XUT1368	FALSE	0.906201	0.199462	unchanged	2.15173	0.000636981	up	2.35731	0.000161474	up	3.44852	0.00038408	up	3.15242	0.0010573	up
XUT1369	TRUE	2.30416	0.000341965	up	2.37165	0.000176588	up	2.99596	1.1019e-06	up	3.2859	5.62781e-05	up	3.35937	2.57736e-05	up
XUT1371	TRUE	2.88507	2.76941e-06	up	3.73939	2.71481e-10	up	4.00036	9.17023e-12	up	2.81499	3.91173e-05	up	3.40522	2.12809e-07	up
XUT1372	TRUE	2.33727	0.0042677	up	3.52318	3.86396e-06	up	3.50399	4.36348e-06	up	2.88514	0.00575239	up	2.83239	0.00575374	up
XUT1373	TRUE	2.12623	1.45862e-22	up	2.37749	1.86034e-27	up	2.7587	2.7276e-37	up	2.76533	6.09643e-25	up	3.21967	7.9524e-35	up
XUT1374	TRUE	2.91871	1.29483e-05	up	2.5045	0.000205206	up	3.6327	1.60141e-08	up	2.77518	0.0103349	up	3.96025	9.02394e-05	up
XUT1375	TRUE	3.15553	5.75484e-05	up	2.64709	0.000783585	up	3.67047	1.14064e-06	up	2.53993	0.0599102	unchanged	3.56767	0.00466641	up
XUT1376	TRUE	1.92257	0.0259683	up	1.70269	0.0466519	up	2.74632	0.00068936	up	1.02924	0.488903	unchanged	2.4301	0.0585306	unchanged
XUT1377	TRUE	2.29824	6.06808e-05	up	2.64493	2.11825e-06	up	2.81129	3.83201e-07	up	2.03181	0.022413	up	2.96112	0.000340501	up
XUT1378	TRUE	1.84932	0.0265067	up	1.71187	0.0347605	up	1.83192	0.0234163	up	2.53764	0.0165743	up	2.85017	0.00520988	up
XUT1379	TRUE	2.32665	0.098216	unchanged	3.55009	0.00561984	up	3.46746	0.00704859	up	5.79942	0.00144958	up	6.42949	0.000291679	up
XUT1380	TRUE	3.5026	0.0179807	up	3.19724	0.0264806	up	4.66896	0.000683918	up	4.00575	0.00562248	up	3.8863	0.00641671	up
XUT1381	TRUE	2.88564	0.161919	unchanged	6.83367	4.54428e-05	up	7.6334	4.07603e-06	up	4.37244	0.00138426	up	4.47137	0.000894064	up
XUT1382	TRUE	1.57491	0.00853064	up	2.47978	1.05286e-05	up	2.36018	3.05087e-05	up	2.30164	0.00557634	up	2.49156	0.00189435	up
XUT1383	TRUE	0.961538	0.0833085	unchanged	1.58121	0.00238499	up	1.79794	0.000481153	up	1.84999	0.0217729	up	2.67685	0.000391404	up
XUT1384	TRUE	2.18979	8.15521e-13	up	1.98592	1.92536e-10	up	2.77803	3.35606e-20	up	2.11024	2.25305e-07	up	2.66059	8.656e-12	up
XUT1385	FALSE	1.01059	0.17556	unchanged	2.49776	0.000156849	up	2.23952	0.000818136	up	2.15049	0.0208676	up	2.12921	0.0188031	up
XUT1386	TRUE	1.97135	4.06864e-10	up	2.2352	1.02083e-12	up	2.75815	3.06966e-19	up	2.58411	1.06251e-12	up	2.91111	1.56872e-16	up
XUT1387	FALSE	-1.37131	NA	NA	-0.259462	0.96348	unchanged	-0.28754	0.957837	unchanged	NA	NA	NA	NA	NA	NA
XUT1388	FALSE	2.4257	NA	NA	0	1	unchanged	2.92336	0.516914	unchanged	3.51897	0.504894	unchanged	0	1	unchanged
XUT1389	TRUE	0.984517	0.215733	unchanged	2.07797	0.00357664	up	2.15949	0.0023946	up	1.0649	0.294184	unchanged	1.64556	0.0801154	unchanged
XUT1390	FALSE	0.980309	0.57378	unchanged	2.31193	0.116526	unchanged	2.30416	0.119333	unchanged	3.85798	0.0464081	up	4.2775	0.0227865	up
XUT1391	FALSE	0.417905	0.534597	unchanged	0.17777	0.781924	unchanged	0.405329	0.516701	unchanged	0.774451	0.313117	unchanged	0.763154	0.302301	unchanged
XUT1392	TRUE	3.14959	5.87413e-22	up	2.53578	6.3309e-14	up	3.56575	7.02115e-28	up	2.81079	1.30048e-13	up	3.18597	5.48544e-18	up
XUT1393	TRUE	0.736468	0.0895483	unchanged	2.09159	9.23088e-08	up	2.14964	3.83588e-08	up	2.90301	3.97711e-11	up	3.22671	4.87404e-14	up
XUT1394	FALSE	0.270575	0.682983	unchanged	2.11289	6.33188e-05	up	1.76294	0.00105149	up	1.51634	0.0423903	up	1.7136	0.0168496	up
XUT1395	TRUE	2.94279	0.000343519	up	3.49103	9.6339e-06	up	4.32304	1.95102e-08	up	3.96208	0.000259823	up	4.56203	1.46138e-05	up
XUT1396	TRUE	3.93107	9.24973e-25	up	3.3162	3.22104e-17	up	4.84892	1.00891e-37	up	3.09098	2.0308e-10	up	4.81767	6.42364e-26	up
XUT1397	TRUE	2.21817	4.60711e-11	up	2.69413	6.92038e-16	up	3.02809	3.81058e-20	up	2.64199	8.25269e-10	up	3.46988	3.13866e-17	up
XUT1398	FALSE	0.540564	0.354813	unchanged	1.44808	0.00517772	up	1.13873	0.0313449	up	2.02655	0.00568701	up	2.12963	0.00273291	up
XUT1399	TRUE	1.49387	0.0581992	unchanged	2.53628	0.000487207	up	2.96505	3.35177e-05	up	3.62453	0.00766234	up	4.5735	0.000437605	up
XUT1400	TRUE	1.87518	0.0677222	unchanged	3.5004	0.00014879	up	4.33976	1.41774e-06	up	2.22643	0.117246	unchanged	2.02408	0.14788	unchanged
XUT1402	FALSE	-0.148983	0.90815	unchanged	0.835925	0.409879	unchanged	1.74121	0.0683465	unchanged	0.658801	0.667365	unchanged	0.0377539	0.983713	unchanged
XUT1403	TRUE	2.16209	0.000784404	up	2.07203	0.00117777	up	3.23358	9.53259e-08	up	1.28589	0.146061	unchanged	2.25723	0.00512313	up
XUT1404	TRUE	2.59107	3.83013e-05	up	3.89654	5.18933e-11	up	4.11651	2.75259e-12	up	3.83512	1.96594e-06	up	4.32536	3.6278e-08	up
XUT1405	TRUE	1.11944	0.0677222	unchanged	2.64614	1.55259e-06	up	2.84036	2.02077e-07	up	2.87122	0.000265723	up	3.22002	2.33412e-05	up
XUT1406	TRUE	2.85738	3.63137e-06	up	3.44857	7.96307e-09	up	3.74033	2.56737e-10	up	2.25153	0.00350011	up	2.98978	3.99872e-05	up
XUT1407	TRUE	4.30439	0.0344436	up	5.51168	0.00338355	up	6.1278	0.000944177	up	4.47052	0.0493814	up	4.73929	0.0313601	up
XUT1408	TRUE	2.23728	NA	NA	4.48025	0.0465902	up	5.83466	0.00727664	up	0	1	unchanged	4.48023	0.202983	unchanged
XUT1409	TRUE	1.22602	1.33255e-05	up	1.61286	3.78573e-09	up	2.11661	3.471e-15	up	1.92552	2.00861e-09	up	1.95903	5.02626e-10	up
XUT1410	TRUE	1.83656	0.000753874	up	3.0376	2.72629e-09	up	3.23048	1.89592e-10	up	2.32109	0.000397342	up	2.93105	2.69527e-06	up
XUT1411	TRUE	2.10889	9.31256e-16	up	2.72085	1.8058e-25	up	3.227	2.59899e-36	up	3.09191	1.41255e-21	up	3.62781	1.816e-30	up
XUT1412	TRUE	3.15744	7.90537e-21	up	4.07358	3.47481e-34	up	4.49859	2.45924e-42	up	4.8292	6.86639e-33	up	5.46577	6.13387e-43	up
XUT1413	TRUE	-0.45886	0.756077	unchanged	2.8737	0.00607109	up	2.23496	0.0381869	up	3.31489	0.10098	unchanged	4.24719	0.0271689	up
XUT1414	TRUE	2.14986	5.12422e-05	up	1.80598	0.000844414	up	3.37393	1.58179e-11	up	3.04054	0.000347961	up	3.68854	6.30151e-06	up
XUT1415	TRUE	3.01632	6.43095e-08	up	2.90039	1.99177e-07	up	3.74238	4.55847e-12	up	3.17397	2.3673e-05	up	3.81812	1.24263e-07	up
XUT1416	TRUE	2.53424	7.2968e-06	up	2.39869	2.26419e-05	up	3.43886	2.06629e-10	up	2.2018	0.00149951	up	3.29807	2.90817e-07	up
XUT1417	TRUE	2.60075	2.50398e-30	up	2.01907	8.13115e-18	up	3.08742	3.88077e-42	up	1.66051	2.29892e-08	up	2.90401	1.28068e-25	up
XUT1418	FALSE	1.49291	0.399474	unchanged	2.69599	0.0810542	unchanged	2.73377	0.0775007	unchanged	2.13028	0.307979	unchanged	2.16521	0.2852	unchanged
XUT1419	FALSE	-0.287684	0.751598	unchanged	0.656875	0.388042	unchanged	0.38817	0.619901	unchanged	0.246702	0.850356	unchanged	0.363244	0.759836	unchanged
XUT1420	FALSE	0.802017	0.633728	unchanged	2.24784	0.108272	unchanged	1.66646	0.251401	unchanged	1.48716	0.460029	unchanged	1.45076	0.456815	unchanged
XUT1421	FALSE	-0.0790789	0.96848	unchanged	1.6847	0.225958	unchanged	0.762713	0.60726	unchanged	1.4888	0.483495	unchanged	0.970964	0.648524	unchanged
XUT1423	TRUE	1.75513	0.00527915	up	4.01174	1.15322e-12	up	3.63598	1.65805e-10	up	4.17081	6.92329e-07	up	4.60773	2.0769e-08	up
XUT1424	TRUE	0.957343	0.0492876	unchanged	3.02876	1.60308e-12	up	2.79598	9.49373e-11	up	3.18178	1.03992e-07	up	3.3027	1.75257e-08	up
XUT1425	FALSE	0.61389	0.505999	unchanged	1.20374	0.140951	unchanged	0.938616	0.262405	unchanged	1.40736	0.217029	unchanged	1.86661	0.0817435	unchanged
XUT1426	TRUE	3.04933	1.08317e-18	up	2.6459	9.71816e-14	up	3.58436	1.42384e-25	up	2.66237	1.847e-08	up	3.54057	3.87879e-15	up
XUT1427	TRUE	3.36193	0.00398642	up	4.61287	2.30629e-05	up	4.23592	0.00011504	up	4.84781	0.00307674	up	6.3091	6.7498e-05	up
XUT1428	TRUE	3.02203	4.87551e-09	up	2.60799	7.34848e-07	up	3.81256	3.0515e-14	up	3.0969	1.30563e-05	up	3.69477	6.23902e-08	up
XUT1429	FALSE	-0.347679	0.789666	unchanged	1.80176	0.0673729	unchanged	1.6185	0.105158	unchanged	1.00129	0.525709	unchanged	1.15515	0.440338	unchanged
XUT1430	TRUE	1.85671	4.02901e-07	up	2.66968	5.14494e-14	up	2.99533	1.24758e-17	up	3.00983	3.67979e-12	up	3.43572	3.41546e-16	up
XUT1431	FALSE	0.305079	0.73681	unchanged	1.91096	0.00855632	up	1.25881	0.0958988	unchanged	2.41139	0.0101861	up	3.12982	0.000431643	up
XUT1432	TRUE	2.30739	5.52439e-06	up	2.74977	3.00662e-08	up	3.44122	1.05704e-12	up	2.091	0.00080671	up	2.97245	3.62588e-07	up
XUT1433	TRUE	3.26471	5.28093e-61	up	2.60747	1.14633e-37	up	3.89515	1.96898e-86	up	2.62287	3.14564e-27	up	3.83199	2.77241e-60	up
XUT1434	TRUE	3.24267	1.74203e-37	up	3.15364	3.45005e-34	up	3.95352	3.51658e-55	up	3.2895	1.18141e-24	up	4.31769	3.56993e-44	up
XUT1435	FALSE	0.309061	0.789173	unchanged	1.79503	0.049534	up	1.67181	0.0702551	unchanged	2.87114	0.0191716	up	2.08742	0.0915154	unchanged
XUT1436	FALSE	1.55415	0.479191	unchanged	4.04228	0.0234066	up	4.92202	0.00482736	up	5.06818	0.0166894	up	5.54091	0.0070389	up
XUT1437	FALSE	1.33601	NA	NA	4.51189	0.0959229	unchanged	3.83283	0.169399	unchanged	3.47057	0.243246	unchanged	4.31248	0.125356	unchanged
XUT1438	TRUE	2.01616	1.26828e-30	up	1.9808	2.2607e-29	up	2.57607	1.27877e-49	up	2.02717	2.43133e-25	up	2.70074	2.09644e-45	up
XUT1439	FALSE	-0.299374	0.797595	unchanged	1.52389	0.0906567	unchanged	1.22832	0.182581	unchanged	1.54148	0.2527	unchanged	2.02022	0.110338	unchanged
XUT1440	FALSE	0.189237	0.79637	unchanged	2.4762	8.58236e-06	up	1.76751	0.00210846	up	2.47997	0.000861985	up	2.31991	0.00154677	up
XUT1441	TRUE	2.47684	3.87173e-10	up	3.9971	6.28717e-26	up	4.58803	1.0834e-34	up	4.83154	2.5068e-22	up	5.38097	4.58988e-28	up
XUT1442	TRUE	1.58434	0.000462266	up	2.79195	4.57425e-11	up	3.11422	1.02467e-13	up	3.01191	2.34947e-07	up	3.74799	2.26209e-11	up
XUT1443	TRUE	1.8922	0.0437971	up	3.03895	0.000445542	up	3.75259	8.69282e-06	up	2.7956	0.0289076	up	3.93932	0.00104639	up
XUT1444	TRUE	2.24827	0.0034143	up	3.29679	4.67063e-06	up	3.10318	1.86653e-05	up	1.9939	0.0221801	up	1.71998	0.0457031	up
XUT1445	FALSE	1.08051	0.252749	unchanged	3.86799	8.72329e-07	up	3.88226	7.81184e-07	up	3.96622	6.01793e-06	up	3.38367	0.000116293	up
XUT1446	FALSE	1.30311	0.0113488	up	2.95441	2.54714e-10	up	3.11912	1.77486e-11	up	2.21454	0.000115852	up	2.53396	4.72924e-06	up
XUT1447	FALSE	0.4992	0.625463	unchanged	1.88332	0.0270348	up	1.38592	0.11502	unchanged	1.19615	0.351616	unchanged	0.326771	0.808078	unchanged
XUT1448	FALSE	0.161486	0.842481	unchanged	1.5526	0.0149187	up	1.03145	0.118075	unchanged	1.7561	0.105612	unchanged	2.00367	0.0540023	unchanged
XUT1449	FALSE	0.759394	0.442628	unchanged	2.06729	0.0151972	up	1.64504	0.05962	unchanged	0.746842	0.537338	unchanged	1.27461	0.252664	unchanged
XUT1450	TRUE	1.20898	0.00963621	up	1.68088	0.000172516	up	1.99307	6.14736e-06	up	1.06165	0.0815332	unchanged	1.3972	0.0151348	up
XUT1451	FALSE	0.920441	0.467795	unchanged	1.36935	0.22894	unchanged	0.515466	0.674228	unchanged	0.236271	0.892653	unchanged	0.505313	0.740504	unchanged
XUT1452	TRUE	1.88737	2.57873e-09	up	2.47908	1.83329e-15	up	2.63575	1.63594e-17	up	2.27164	2.85292e-08	up	2.63595	2.48411e-11	up
XUT1453	TRUE	1.52541	0.000148203	up	1.28948	0.00129502	up	1.89565	1.10837e-06	up	0.835265	0.140769	unchanged	1.3097	0.012299	up
XUT1454	FALSE	-0.024191	0.972092	unchanged	1.66343	0.000401854	up	1.17304	0.0154255	up	0.62102	0.423238	unchanged	0.699438	0.343003	unchanged
XUT1455	FALSE	-0.184634	0.815198	unchanged	2.18887	0.000168646	up	1.95485	0.000904146	up	2.68003	0.000230905	up	2.27595	0.00167189	up
XUT1456	TRUE	3.96644	0.0294546	up	4.12107	0.0172308	up	4.93942	0.00353625	up	4.47043	0.0400731	up	5.24445	0.0115785	up
XUT1457	TRUE	2.3789	1.06961e-07	up	3.52612	2.34661e-16	up	3.96579	8.39226e-21	up	3.23405	9.81322e-09	up	4.19547	8.82827e-15	up
XUT1458	TRUE	2.48409	1.10958e-12	up	3.67702	2.92941e-27	up	3.89681	5.73441e-31	up	4.45469	1.20638e-24	up	4.79783	4.21475e-29	up
XUT1459	FALSE	0.511226	0.519394	unchanged	2.49301	0.000127406	up	2.52513	0.000102917	up	2.34841	0.0175584	up	2.69008	0.0046075	up
XUT1460	TRUE	1.8072	0.0791184	unchanged	1.80574	0.0657769	unchanged	2.75887	0.00364787	up	4.74267	0.00374234	up	6.07377	0.00012138	up
XUT1462	FALSE	1.55201	0.129329	unchanged	4.22525	1.45565e-06	up	3.74145	2.5188e-05	up	3.62074	0.00062829	up	3.56037	0.000638523	up
XUT1463	TRUE	3.48715	0.000457798	up	3.71166	0.000112441	up	4.67665	5.78484e-07	up	4.96468	0.00281909	up	5.77079	0.000373053	up
XUT1464	TRUE	3.66647	1.18129e-08	up	3.82533	1.65313e-09	up	4.56475	2.09049e-13	up	3.20789	6.19706e-05	up	4.26832	2.24744e-08	up
XUT1465	TRUE	1.09637	0.0499455	up	1.73602	0.00100314	up	2.40191	2.53976e-06	up	2.48203	0.00126022	up	3.08185	2.59365e-05	up
XUT1466	FALSE	1.07702	0.247839	unchanged	1.66588	0.0511011	unchanged	2.08096	0.0129485	up	1.36745	0.355291	unchanged	2.80447	0.0336219	up
XUT1467	TRUE	4.48987	1.99605e-45	up	3.40781	6.04521e-25	up	5.26666	1.61555e-62	up	3.20615	4.39833e-13	up	4.80161	4.45626e-30	up
XUT1468	TRUE	2.69082	8.62692e-06	up	2.44086	5.92861e-05	up	3.38184	6.44312e-09	up	4.37701	0.0083357	up	5.9818	0.000163299	up
XUT1469	TRUE	3.64274	7.70887e-20	up	2.36996	2.30865e-08	up	3.9662	1.87702e-23	up	1.80713	0.00485755	up	3.90206	8.09246e-12	up
XUT1470	TRUE	3.6842	6.15506e-11	up	2.96464	2.91705e-07	up	4.22437	1.9246e-14	up	2.7163	0.0046045	up	4.16123	2.904e-06	up
XUT1471	TRUE	1.86962	6.63549e-20	up	1.84189	5.33192e-19	up	2.60058	8.75621e-38	up	1.93506	9.49455e-15	up	2.40976	2.64235e-23	up
XUT1472	TRUE	4.45214	0.00709679	up	5.69469	0.000222417	up	6.03212	8.32676e-05	up	2.35749	0.11942	unchanged	3.28462	0.0209966	up
XUT1473	TRUE	1.69325	0.0287991	up	3.14135	9.0649e-06	up	2.75498	0.000126091	up	3.79118	0.00157764	up	4.12928	0.000420696	up
XUT1474	TRUE	2.35893	7.03141e-27	up	2.48467	8.26372e-29	up	2.91671	2.84389e-40	up	2.98058	4.19518e-23	up	3.54404	1.01406e-33	up
XUT1478	TRUE	4.40751	0.0248888	up	6.20451	0.000542866	up	6.19578	0.000550503	up	5.2833	0.00912686	up	5.54012	0.00511142	up
XUT1479	TRUE	3.51092	6.85591e-28	up	3.00579	6.56344e-20	up	3.93032	1.09167e-34	up	2.53783	1.76681e-09	up	3.37279	5.61663e-17	up
XUT1480	TRUE	2.05392	2.01895e-17	up	2.35622	2.98177e-22	up	2.79726	1.1982e-31	up	2.44136	2.71048e-13	up	2.79858	7.72502e-18	up
XUT1481	TRUE	0.974383	0.095334	unchanged	1.52186	0.00555343	up	1.77199	0.0010731	up	2.72746	3.04512e-05	up	2.35955	0.000285614	up
XUT1482	TRUE	2.6326	0.0697332	unchanged	4.63045	0.000374058	up	4.4018	0.000761463	up	4.02755	0.0286849	up	4.73462	0.00781078	up
XUT1483	TRUE	2.72236	0.00832955	up	3.69725	0.000132922	up	4.70678	5.59153e-07	up	2.51307	0.0101861	up	2.75196	0.0035938	up
XUT1484	TRUE	-0.441505	0.658721	unchanged	-0.282987	0.757902	unchanged	0.517069	0.549038	unchanged	0.964676	0.407064	unchanged	0.567329	0.625269	unchanged
XUT1486	TRUE	1.45246	0.0191638	up	2.10648	0.000345222	up	2.85312	5.23602e-07	up	2.58309	0.00122132	up	3.16914	3.27771e-05	up
XUT1488	FALSE	0	NA	NA	3.51201	0.46744	unchanged	0	1	unchanged	NA	NA	NA	NA	NA	NA
XUT1489	TRUE	0.978098	0.065906	unchanged	1.7233	0.000518349	up	2.21724	4.85919e-06	up	1.806	0.00367608	up	2.11835	0.000372816	up
XUT1490	TRUE	2.00496	6.17806e-05	up	2.91671	9.73419e-10	up	3.02965	1.75294e-10	up	2.74817	7.73139e-05	up	3.56641	8.14715e-08	up
XUT1491	TRUE	2.49964	7.04701e-05	up	3.27872	5.18988e-08	up	3.70969	3.87932e-10	up	2.34297	0.000372106	up	3.23651	1.81612e-07	up
XUT1492	FALSE	0.44915	0.480975	unchanged	1.64875	0.00261403	up	1.42483	0.010386	up	1.19086	0.147247	unchanged	1.32443	0.0921395	unchanged
XUT1493	TRUE	2.14742	4.67549e-10	up	2.99322	6.42431e-19	up	3.46796	1.22544e-25	up	3.86573	2.68853e-14	up	4.41578	6.13408e-19	up
XUT1494	TRUE	1.92236	0.000707591	up	3.65472	2.7283e-12	up	3.76948	4.31871e-13	up	3.41351	9.88995e-08	up	3.6299	7.11008e-09	up
XUT1496	TRUE	2.05888	5.75293e-10	up	2.21549	2.84904e-11	up	2.9246	1.56384e-19	up	2.85098	1.68567e-11	up	3.52324	5.7978e-18	up
XUT1497	FALSE	1.75223	0.00538424	up	2.8343	1.45284e-06	up	2.73525	3.64462e-06	up	2.42247	0.00453219	up	1.7275	0.0444868	up
XUT1498	TRUE	1.33959	1.46445e-17	up	0.960138	1.45641e-09	unchanged	1.47261	4.24668e-21	up	0.764305	7.01753e-05	unchanged	0.935043	5.35795e-07	unchanged
XUT1499	FALSE	1.49898	0.26578	unchanged	1.29602	0.317541	unchanged	2.4142	0.0464363	up	1.89723	0.250989	unchanged	0.264807	0.885683	unchanged
XUT1500	FALSE	0.823102	0.0207674	unchanged	1.60007	1.734e-06	up	1.77413	8.96253e-08	up	1.66259	0.000164622	up	1.86063	1.20829e-05	up
XUT1501	TRUE	2.42017	1.19574e-11	up	2.07479	1.50854e-08	up	2.93665	7.59581e-17	up	1.74553	0.000413587	up	2.3883	2.71974e-07	up
XUT1502	TRUE	1.57861	0.0672764	unchanged	4.79753	6.37512e-11	up	4.07726	4.41836e-08	up	6.40708	3.44826e-05	up	6.62862	1.54552e-05	up
XUT1503	TRUE	3.06643	2.37766e-26	up	3.13295	9.13871e-27	up	3.88067	6.92995e-42	up	2.93478	3.62749e-12	up	4.26369	1.85331e-26	up
XUT1505	TRUE	1.26687	0.311719	unchanged	2.25677	0.0426415	up	2.34836	0.0346953	up	3.47007	0.131254	unchanged	5.89055	0.00371563	up
XUT1506	FALSE	0.128649	0.885638	unchanged	1.56525	0.0224518	up	1.32312	0.0577768	unchanged	2.20506	0.0814792	unchanged	2.01736	0.104667	unchanged
XUT1507	TRUE	1.51231	0.00582007	up	2.26323	1.35328e-05	up	2.8065	3.23361e-08	up	2.65867	7.81964e-05	up	2.843	1.35948e-05	up
XUT1508	TRUE	3.16632	5.25352e-07	up	3.32785	8.84334e-08	up	3.82397	3.85866e-10	up	3.20904	7.06779e-06	up	3.65061	1.29877e-07	up
XUT1509	FALSE	0.807342	NA	NA	2.60188	0.161962	unchanged	3.02695	0.0986666	unchanged	1.08281	0.708557	unchanged	3.43288	0.149919	unchanged
XUT1510	TRUE	1.86533	5.88324e-11	up	2.82538	2.98609e-24	up	2.90005	1.06902e-25	up	3.08876	3.60882e-18	up	3.3818	2.19825e-22	up
XUT1511	FALSE	0.632786	0.0001395	unchanged	0.800855	4.02085e-07	unchanged	1.06222	1.32158e-11	up	1.30041	8.63077e-17	up	1.63185	4.66687e-26	up
XUT1512	FALSE	-0.125832	0.92629	unchanged	1.26191	0.21362	unchanged	1.38536	0.170756	unchanged	0.488531	0.7683	unchanged	0.971038	0.515804	unchanged
XUT1513	TRUE	2.73998	2.80405e-13	up	2.73164	5.58277e-13	up	3.60825	8.63676e-23	up	2.53493	4.84574e-07	up	3.82111	5.70686e-16	up
XUT1514	FALSE	0.598159	0.337597	unchanged	2.05489	0.000134184	up	1.99453	0.000222133	up	2.39761	0.00154536	up	2.35944	0.00143082	up
XUT1515	TRUE	1.39017	0.0143378	up	3.502	4.34862e-12	up	3.30586	7.68983e-11	up	3.47993	2.58299e-06	up	3.90259	5.89021e-08	up
XUT1516	TRUE	1.94436	0.000335236	up	3.27915	9.85319e-11	up	3.32937	4.46432e-11	up	3.94862	2.36459e-06	up	4.28052	1.78319e-07	up
XUT1517	FALSE	1.04487	0.00344793	up	1.70428	5.19241e-07	up	1.60703	2.52276e-06	up	1.6003	0.000450121	up	1.90958	1.23324e-05	up
XUT1518	FALSE	0	NA	NA	4.53391	0.36607	unchanged	3.17725	0.536902	unchanged	2.50868	0.645917	unchanged	1.89032	0.727162	unchanged
XUT1519	TRUE	0	NA	NA	0	1	unchanged	2.29266	0.658984	unchanged	NA	NA	NA	NA	NA	NA
XUT1520	TRUE	1.86214	7.3608e-14	up	3.06074	2.39144e-36	up	3.25846	1.20993e-41	up	2.7932	1.89297e-19	up	3.05847	6.1775e-24	up
XUT1521	FALSE	0.564695	0.408817	unchanged	1.59476	0.00771032	up	1.29659	0.0337783	up	1.55216	0.119832	unchanged	1.82649	0.0550938	unchanged
XUT1522	TRUE	2.66981	5.18127e-12	up	2.39767	1.22105e-09	up	3.21479	3.3913e-17	up	1.98043	3.36022e-05	up	2.69413	2.36501e-09	up
XUT1523	FALSE	0.970402	3.67392e-05	unchanged	1.06086	3.45388e-06	up	1.52941	1.07963e-11	up	0.812254	0.0028581	unchanged	1.27435	9.2248e-07	up
XUT1524	FALSE	1.7818	0.057953	unchanged	4.90511	1.09663e-09	up	4.9212	8.79806e-10	up	4.55791	1.20405e-05	up	5.15336	4.23292e-07	up
XUT1525	TRUE	2.48518	1.13051e-34	up	2.80105	6.42863e-43	up	3.45479	1.81157e-66	up	3.05993	9.8779e-39	up	3.54658	1.24061e-53	up
XUT1526	TRUE	2.10036	1.65143e-08	up	1.87203	5.88734e-07	up	2.66401	2.24849e-13	up	1.61505	0.000625212	up	2.31803	1.79911e-07	up
XUT1527	TRUE	3.08047	0.0430423	up	3.27493	0.0238579	up	3.8538	0.00670877	up	3.87206	0.034444	up	5.03854	0.0039583	up
XUT1528	TRUE	2.60231	6.30452e-08	up	2.71676	1.37446e-08	up	3.20313	8.52068e-12	up	3.46855	8.1449e-11	up	3.81509	2.55689e-13	up
XUT1529	TRUE	1.79278	2.50658e-15	up	1.99332	1.10924e-18	up	2.44255	6.57268e-28	up	2.62266	3.33255e-25	up	2.92741	3.46293e-32	up
XUT1530	TRUE	1.15966	0.133037	unchanged	2.78418	4.89209e-05	up	2.15533	0.00222093	up	2.44837	0.00468037	up	2.82771	0.000691412	up
XUT1532	TRUE	1.54026	NA	NA	2.45788	0.174742	unchanged	1.27962	0.513799	unchanged	-0.790161	0.80753	unchanged	-1.34596	0.663527	unchanged
XUT1533	TRUE	NA	NA	NA	NA	NA	NA	NA	NA	NA	NA	NA	NA	NA	NA	NA
XUT1534	FALSE	NA	NA	NA	NA	NA	NA	NA	NA	NA	NA	NA	NA	NA	NA	NA
XUT1535	TRUE	2.45318	5.32212e-05	up	3.02	2.6002e-07	up	3.4242	2.96442e-09	up	2.78215	0.000189687	up	3.62251	3.05093e-07	up
XUT1536	TRUE	2.056	9.14021e-07	up	1.93663	4.29936e-06	up	2.19657	1.23229e-07	up	2.36751	9.13353e-06	up	2.90426	1.30522e-08	up
XUT1537	TRUE	1.86415	4.08843e-05	up	2.68745	6.54642e-10	up	3.23053	3.74112e-14	up	2.6032	6.40127e-06	up	3.18829	7.69696e-09	up
XUT1538	FALSE	0.895922	0.333714	unchanged	2.2893	0.0044734	up	2.63522	0.000921773	up	3.03333	0.008765	up	2.88705	0.0111149	up
XUT1539	TRUE	2.30952	2.59846e-12	up	2.9768	6.2405e-20	up	3.41838	1.60225e-26	up	2.92733	6.0428e-13	up	3.46345	1.60411e-18	up
XUT1540	TRUE	1.05896	0.0493884	up	0.599666	0.272806	unchanged	1.82757	0.000285217	up	1.09644	0.230598	unchanged	1.70342	0.0469602	up
XUT1541	TRUE	2.40239	1.71101e-08	up	2.43472	1.24463e-08	up	3.06077	1.83826e-13	up	3.40339	6.12655e-07	up	4.12451	3.64006e-10	up
XUT1542	FALSE	1.31457	NA	NA	0	1	unchanged	0	1	unchanged	NA	NA	NA	NA	NA	NA
XUT1543	FALSE	0.0607975	0.919104	unchanged	0.793244	0.0882804	unchanged	0.354938	0.466054	unchanged	0.858387	0.165644	unchanged	0.922978	0.120997	unchanged
XUT1544	FALSE	0.167247	0.780453	unchanged	0.871749	0.0777805	unchanged	0.593374	0.24156	unchanged	0.908813	0.188451	unchanged	0.279966	0.695066	unchanged
XUT1545	TRUE	1.41836	0.000523286	up	2.97248	3.40938e-15	up	3.42115	3.23726e-20	up	3.69754	1.74961e-09	up	4.05509	1.46319e-11	up
XUT1546	TRUE	2.29848	0.00185702	up	3.52915	3.06771e-07	up	3.8233	2.14432e-08	up	3.27454	0.000440794	up	4.36138	9.20448e-07	up
XUT1547	FALSE	-0.468653	0.391753	unchanged	0.633299	0.187883	unchanged	0.557168	0.251993	unchanged	0.559918	0.481277	unchanged	0.04244	0.960672	unchanged
XUT1548	TRUE	1.60985	0.00843945	up	0.999306	0.110864	unchanged	2.10883	0.000304889	up	0.718059	0.328261	unchanged	1.15322	0.0910654	unchanged
XUT1549	TRUE	2.25796	1.18718e-15	up	2.65422	5.02911e-21	up	3.19827	6.65594e-31	up	3.38574	1.10596e-20	up	4.04281	3.14832e-30	up
XUT1550	TRUE	1.64247	0.000961428	up	1.86538	0.000122866	up	2.15395	6.80033e-06	up	2.62463	0.000113337	up	2.22123	0.00102895	up
XUT1551	FALSE	0.737716	0.553678	unchanged	1.71894	0.110129	unchanged	1.94174	0.0686889	unchanged	1.41057	0.234915	unchanged	1.97689	0.0750963	unchanged
XUT1552	TRUE	1.873	0.00120882	up	2.88725	1.16365e-07	up	2.71376	7.55907e-07	up	3.65876	1.05326e-05	up	4.43738	3.38852e-08	up
XUT1553	FALSE	0.738363	0.138122	unchanged	2.62123	1.5062e-09	up	2.99695	2.43314e-12	up	3.87808	8.39651e-08	up	4.45049	2.84749e-10	up
XUT1554	TRUE	2.34195	0.00544003	up	3.83304	8.21695e-07	up	3.97517	2.794e-07	up	4.65816	0.000210731	up	5.51189	6.7572e-06	up
XUT1555	TRUE	1.37297	0.153581	unchanged	0.755536	0.431158	unchanged	1.09099	0.243268	unchanged	0.5969	0.722599	unchanged	0.617502	0.698622	unchanged
XUT1556	FALSE	0.815028	0.225746	unchanged	1.54535	0.011952	up	2.0174	0.000769926	up	2.31107	0.00564923	up	2.4782	0.00214651	up
XUT1557	TRUE	1.6969	0.087503	unchanged	2.88609	0.00143908	up	2.68139	0.00336672	up	2.22152	0.0612779	unchanged	2.26588	0.0494843	up
XUT1558	TRUE	1.53855	0.135942	unchanged	1.99675	0.0376998	up	2.22836	0.0194934	up	0.695713	0.620314	unchanged	2.79425	0.0148651	up
XUT1559	FALSE	0.54849	0.377889	unchanged	1.78461	0.000966117	up	1.64037	0.0026384	up	1.70659	0.0263506	up	1.88237	0.0109004	up
XUT1560	TRUE	1.37609	0.12998	unchanged	1.63835	0.056533	unchanged	2.23136	0.0075793	up	2.0311	0.116177	unchanged	3.07372	0.0102748	up
XUT1564	FALSE	0.392011	0.0539444	unchanged	0.382225	0.0488505	unchanged	0.66772	0.000500952	unchanged	0.548698	0.0189951	unchanged	0.884216	7.30921e-05	unchanged
XUT1565	TRUE	3.83268	1.86214e-24	up	3.81536	9.04706e-24	up	5.03599	2.37502e-42	up	2.72758	9.38653e-10	up	3.93487	1.79301e-20	up
XUT1566	TRUE	4.71504	0.00412017	up	5.43426	0.000450687	up	6.13608	6.13767e-05	up	3.99805	0.000712129	up	3.67074	0.00174378	up
XUT1567	TRUE	4.18447	3.72346e-06	up	4.57578	1.75582e-07	up	5.2956	7.98648e-10	up	7.99079	4.49322e-07	up	8.06616	2.97623e-07	up
XUT1568	TRUE	1.70689	NA	NA	1.2954	0.505786	unchanged	2.55343	0.159147	unchanged	2.11536	0.488769	unchanged	2.72411	0.346661	unchanged
XUT1569	TRUE	0.910918	0.50604	unchanged	0.706757	0.580998	unchanged	0.794072	0.533609	unchanged	3.41194	0.137993	unchanged	3.18674	0.160411	unchanged
XUT1570	TRUE	1.60252	0.000269744	up	3.41085	3.01142e-17	up	3.328	1.79e-16	up	3.04653	5.41807e-09	up	3.62279	7.31288e-13	up
XUT1571	FALSE	0.266852	0.685942	unchanged	1.82748	0.00062648	up	1.61112	0.00291275	up	2.64896	0.000610653	up	2.70335	0.000346697	up
XUT1572	TRUE	2.15906	0.00137896	up	2.63878	4.78446e-05	up	3.3833	8.12684e-08	up	1.90481	0.0122464	up	2.16017	0.00303732	up
XUT1573	TRUE	1.50412	1.28773e-06	up	1.81273	3.35106e-09	up	2.20254	2.5219e-13	up	1.873	2.11648e-05	up	2.60189	3.89149e-10	up
XUT1574	TRUE	1.60565	0.00159353	up	4.17199	3.21126e-20	up	4.34274	4.82172e-22	up	4.91065	1.71685e-13	up	5.36164	3.35039e-16	up
XUT1575	TRUE	1.07017	0.0653153	unchanged	1.4865	0.00693847	up	1.76246	0.00117631	up	2.11283	0.0143491	up	2.78135	0.000651638	up
XUT1576	FALSE	0.553888	0.534535	unchanged	1.49159	0.0533726	unchanged	0.974053	0.224931	unchanged	1.0458	0.323376	unchanged	1.58399	0.106195	unchanged
XUT1577	TRUE	1.66981	1.41493e-07	up	1.41827	1.14037e-05	up	2.11691	1.05621e-11	up	1.8667	1.77123e-05	up	2.76263	1.13239e-11	up
XUT1578	TRUE	3.45216	0.000355804	up	4.60864	4.26804e-07	up	4.45991	1.04223e-06	up	4.36259	0.000740787	up	4.97072	7.97086e-05	up
XUT1579	TRUE	1.47531	0.036606	up	3.71741	2.74821e-09	up	3.58145	1.12094e-08	up	2.42217	0.000334496	up	2.95447	4.90793e-06	up
XUT1581	TRUE	4.38753	0.0131319	up	8.34536	1.0756e-07	up	7.98564	3.68549e-07	up	3.83938	0.000134568	up	4.18451	2.0215e-05	up
XUT1582	TRUE	1.18633	0.229021	unchanged	4.41906	3.99476e-08	up	4.29115	1.02113e-07	up	4.21051	0.00022631	up	4.38362	9.30219e-05	up
XUT1583	TRUE	0.784621	0.388556	unchanged	0.821497	0.335632	unchanged	1.52149	0.0612887	unchanged	1.4017	0.252886	unchanged	1.59483	0.170957	unchanged
XUT1584	TRUE	1.47291	0.0144201	up	2.79418	4.60722e-07	up	2.74688	7.52262e-07	up	2.9583	6.70368e-05	up	3.18424	1.0228e-05	up
XUT1585	FALSE	1.12142	0.136987	unchanged	2.73197	4.30406e-05	up	2.71228	4.98473e-05	up	2.35594	0.0157619	up	2.71193	0.00382268	up
XUT1586	TRUE	5.24438	0.00365344	up	6.74777	5.87756e-05	up	7.60487	4.55033e-06	up	6.295	0.000542021	up	6.69562	0.000182127	up
XUT1587	TRUE	2.75155	1.75305e-06	up	4.09404	7.21475e-14	up	4.76641	8.24299e-19	up	4.28296	4.91342e-10	up	4.72798	2.61639e-12	up
XUT1588	TRUE	1.87984	2.50832e-05	up	3.13551	9.8302e-14	up	3.49395	4.64536e-17	up	1.94874	0.000620227	up	3.05039	8.45484e-09	up
XUT1589	TRUE	1.82168	7.05756e-09	up	2.22652	8.72011e-13	up	2.43171	3.19003e-15	up	2.61858	9.12614e-11	up	2.89362	1.7149e-13	up
XUT1590	TRUE	2.75417	4.09995e-23	up	3.72503	1.50634e-41	up	3.97201	7.32185e-48	up	3.3188	3.23923e-23	up	3.66485	4.56523e-29	up
XUT1591	TRUE	3.34766	7.72061e-24	up	4.10665	2.73297e-35	up	4.8843	5.55879e-51	up	3.88775	6.91615e-18	up	4.94081	1.47159e-29	up
XUT1592	TRUE	1.17024	0.099159	unchanged	4.80114	2.21836e-16	up	4.34254	1.61106e-13	up	4.31869	7.95982e-06	up	4.29198	7.03674e-06	up
XUT1593	TRUE	0.961646	0.370889	unchanged	2.63966	0.00385994	up	3.2996	0.000215292	up	1.41818	0.247096	unchanged	1.87339	0.104912	unchanged
XUT1594	TRUE	1.8315	0.000459312	up	1.8494	0.000355124	up	2.59375	1.95273e-07	up	2.07297	0.00455879	up	2.86667	3.14092e-05	up
XUT1595	TRUE	3.63606	0.00565035	up	5.3073	1.26958e-05	up	5.7895	1.55341e-06	up	3.44927	0.00224433	up	4.83896	5.98784e-06	up
XUT1596	TRUE	2.81234	0.000182615	up	3.45495	1.64442e-06	up	4.2165	2.03681e-09	up	5.21092	0.00128635	up	5.9216	0.000186361	up
XUT1597	TRUE	1.63943	0.0155165	up	2.66591	2.45124e-05	up	3.08179	7.04735e-07	up	2.74709	0.00447777	up	3.0988	0.000886542	up
XUT1598	TRUE	0.784178	0.252951	unchanged	1.7598	0.00425512	up	2.64431	7.33468e-06	up	2.47375	0.00420148	up	2.5311	0.00260511	up
XUT1599	TRUE	1.87653	0.0142592	up	1.46383	0.0568184	unchanged	2.47209	0.000664569	up	2.66485	0.00260002	up	2.7333	0.00151647	up
XUT1600	TRUE	2.75648	7.7791e-11	up	3.94982	6.97699e-22	up	4.48721	1.36973e-28	up	3.93739	3.52205e-15	up	4.27228	3.3448e-18	up
XUT1602	TRUE	2.28058	7.49819e-07	up	1.68772	0.000405016	up	2.712	1.78129e-09	up	1.56993	0.0193712	up	2.86972	2.52966e-06	up
XUT1603	TRUE	2.68498	1.47768e-13	up	2.27134	1.10581e-09	up	3.25304	1.11348e-19	up	3.22727	1.063e-11	up	3.79173	1.64137e-16	up
XUT1604	TRUE	0.966472	0.282096	unchanged	0.768552	0.373395	unchanged	1.59409	0.0510578	unchanged	0.306999	0.853635	unchanged	1.90179	0.144707	unchanged
XUT1605	FALSE	0.442847	0.715067	unchanged	1.97375	0.0430112	up	1.89326	0.0541243	unchanged	2.14756	0.140134	unchanged	2.37025	0.0908689	unchanged
XUT1607	FALSE	1.51951	0.320565	unchanged	1.66327	0.242823	unchanged	2.07147	0.136643	unchanged	1.0271	0.649128	unchanged	2.14644	0.280667	unchanged
XUT1608	FALSE	1.40605	0.251646	unchanged	1.74699	0.123363	unchanged	1.17385	0.322337	unchanged	0.306099	0.874506	unchanged	0.956968	0.562303	unchanged
XUT1609	FALSE	1.10264	0.0076322	up	1.55745	8.58973e-05	up	1.9703	3.98979e-07	up	2.46018	2.23721e-06	up	2.8498	1.41591e-08	up
XUT1610	TRUE	1.87142	0.0712082	unchanged	3.0231	0.00147134	up	3.13664	0.000934198	up	2.78914	0.0282452	up	4.10863	0.000547602	up
XUT1611	FALSE	0.832728	0.0675576	unchanged	1.60887	0.000148845	up	1.46446	0.000624091	up	1.53686	0.00699973	up	1.81617	0.000867021	up
XUT1612	TRUE	3.76367	2.77228e-61	up	3.01201	9.11022e-38	up	4.30064	1.09732e-79	up	2.75691	2.11302e-20	up	4.12081	3.48523e-47	up
XUT1613	TRUE	3.12706	4.57429e-20	up	3.05723	1.16653e-18	up	4.29379	8.92889e-38	up	2.91325	3.50518e-11	up	4.0997	1.3366e-22	up
XUT1614	FALSE	-0.153557	0.867708	unchanged	1.41951	0.0458068	up	0.818385	0.268595	unchanged	2.37459	0.0115672	up	2.10744	0.0230901	up
XUT1615	FALSE	0.383107	0.720672	unchanged	0.753806	0.414277	unchanged	0.721925	0.438113	unchanged	0.579225	0.729303	unchanged	0.0121681	0.997779	unchanged
XUT1616	FALSE	0.0625801	0.961784	unchanged	2.88484	0.000526735	up	2.61387	0.00190972	up	4.61351	0.000703422	up	3.92744	0.00397284	up
XUT1617	TRUE	1.60477	0.000114679	up	2.72001	4.41871e-12	up	3.03403	5.47069e-15	up	3.78482	1.97396e-13	up	3.90378	1.41952e-14	up
XUT1618	TRUE	1.92612	0.00756962	up	3.72447	1.3486e-08	up	3.85165	3.6015e-09	up	3.79155	0.000128604	up	4.12068	1.98471e-05	up
XUT1619	TRUE	1.5898	6.79442e-06	up	2.79032	8.72111e-17	up	2.82046	3.38918e-17	up	2.49192	2.02344e-08	up	2.90996	1.15772e-11	up
XUT1620	TRUE	1.44396	0.366858	unchanged	3.13863	0.0217947	up	3.94453	0.00315764	up	1.78408	0.296744	unchanged	2.81803	0.0754182	unchanged
XUT1621	TRUE	2.64319	0.00105365	up	4.41256	3.11417e-09	up	4.48128	1.56469e-09	up	4.87685	6.91804e-05	up	5.51343	4.35255e-06	up
XUT1622	TRUE	3.47482	0.0184557	up	3.65401	0.00943886	up	4.78205	0.000463011	up	0.0091326	1	unchanged	2.92593	0.0294946	up
XUT1623	TRUE	1.97268	0.000285298	up	3.03515	3.38686e-09	up	3.44542	9.45736e-12	up	1.43614	0.0413653	up	2.41495	0.000224366	up
XUT1624	TRUE	2.931	0.00013169	up	3.4229	3.58915e-06	up	3.89641	8.26441e-08	up	2.96076	0.00338678	up	3.77421	8.7291e-05	up
XUT1625	TRUE	2.5486	6.0192e-14	up	3.01099	4.7588e-19	up	3.29334	6.02348e-23	up	2.72119	3.15064e-09	up	3.72604	1.34626e-17	up
XUT1626	FALSE	0.794082	0.106648	unchanged	2.73788	2.29894e-10	up	2.31355	1.3652e-07	up	2.56975	1.04883e-05	up	2.91594	2.36057e-07	up
XUT1627	TRUE	2.31959	0.177843	unchanged	3.91745	0.0105333	up	3.70697	0.0163107	up	3.40725	0.118638	unchanged	3.13062	0.146695	unchanged
XUT1628	TRUE	1.54218	0.000306841	up	2.85884	8.11902e-13	up	3.05883	1.14298e-14	up	3.64526	1.8208e-08	up	3.69489	6.86649e-09	up
XUT1629	TRUE	0.989231	0.0300231	unchanged	3.03246	7.43432e-14	up	3.04416	5.47342e-14	up	3.40397	8.63115e-14	up	3.48093	8.98628e-15	up
XUT1630	TRUE	1.60121	0.00121365	up	1.3117	0.00825973	up	2.01465	2.42394e-05	up	1.31689	0.115019	unchanged	2.11588	0.00616998	up
XUT1631	TRUE	2.77807	0.00220578	up	4.01558	2.16389e-06	up	4.86327	4.49618e-09	up	4.98868	6.83622e-05	up	5.29567	1.76863e-05	up
XUT1632	FALSE	0.590441	0.539982	unchanged	1.30243	0.124345	unchanged	2.49309	0.00180859	up	2.53145	0.0460382	up	1.78523	0.163414	unchanged
XUT1633	FALSE	0.67939	0.107106	unchanged	1.87785	8.743e-07	up	1.79069	3.05732e-06	up	1.96317	8.28267e-05	up	2.30332	1.68833e-06	up
XUT1634	FALSE	0.518989	0.542829	unchanged	1.1259	0.134852	unchanged	1.09331	0.148946	unchanged	1.04937	0.289181	unchanged	1.13176	0.232689	unchanged
XUT1635	FALSE	0.143704	0.833719	unchanged	1.33117	0.0139323	up	1.33868	0.01364	up	1.33934	0.0865949	unchanged	1.73552	0.0187521	up
XUT1636	TRUE	2.05973	0.192433	unchanged	2.68436	0.0642944	unchanged	3.18288	0.0255942	up	3.86993	0.0504441	unchanged	3.50304	0.0739413	unchanged
XUT1637	FALSE	1.09347	0.0314143	up	2.45046	1.29132e-07	up	2.11993	6.91599e-06	up	1.26952	0.05319	unchanged	1.74163	0.00487405	up
XUT1638	TRUE	1.50971	0.0208533	up	2.01087	0.00121397	up	2.22489	0.000305294	up	1.17097	0.166938	unchanged	1.95344	0.0123583	up
XUT1639	TRUE	2.89386	1.0436e-45	up	1.01246	2.00845e-06	up	2.9175	1.63233e-46	up	0.712888	0.00193204	unchanged	2.36569	3.97469e-30	up
XUT1640	FALSE	0.9154	0.2179	unchanged	2.01666	0.00244685	up	1.91945	0.00416769	up	2.06575	0.0130027	up	2.31074	0.00388429	up
XUT1641	FALSE	0.559311	0.0374696	unchanged	1.54346	5.23165e-10	up	1.68883	8.31118e-12	up	1.70576	7.47229e-07	up	1.72292	3.52956e-07	up
XUT1642	FALSE	0.768855	0.213621	unchanged	1.66901	0.00282119	up	1.05104	0.0702358	unchanged	1.06356	0.180405	unchanged	1.11743	0.143735	unchanged
XUT1643	TRUE	1.02402	0.372864	unchanged	3.65513	9.80511e-05	up	3.69818	7.94158e-05	up	7.51387	5.21666e-06	up	7.06123	1.77504e-05	up
XUT1644	FALSE	0.923732	0.140813	unchanged	2.06955	0.000264624	up	1.79571	0.00182786	up	1.42112	0.0429372	up	1.74751	0.00883136	up
XUT1645	FALSE	-0.187979	0.919104	unchanged	0.888011	0.536738	unchanged	1.80617	0.180892	unchanged	1.91427	0.43768	unchanged	-0.690627	0.807958	unchanged
XUT1646	TRUE	2.91539	8.33825e-21	up	3.66637	2.77293e-32	up	3.92839	1.489e-37	up	3.07264	9.76206e-17	up	3.75209	1.15169e-25	up
XUT1647	FALSE	1.22838	0.0673686	unchanged	2.19808	0.000392997	up	2.3055	0.0001892	up	3.12206	0.00363382	up	3.15983	0.00262515	up
XUT1648	TRUE	0.660062	0.407826	unchanged	1.53772	0.0291037	up	1.99704	0.00376013	up	3.05928	0.0167513	up	3.28367	0.00805187	up
XUT1649	TRUE	2.64571	1.96949e-17	up	3.04802	1.44384e-22	up	3.78991	1.58911e-35	up	3.08889	4.08454e-16	up	3.80659	3.1383e-25	up
XUT1650	TRUE	2.78349	1.29483e-05	up	3.20312	2.57067e-07	up	3.99029	4.19338e-11	up	3.36654	0.000720212	up	4.64564	8.58253e-07	up
XUT1651	TRUE	1.71533	0.0171744	up	1.66416	0.017798	up	2.65022	8.18141e-05	up	1.67996	0.0277478	up	2.02402	0.00539194	up
XUT1652	TRUE	1.23535	0.0657424	unchanged	2.00089	0.00138567	up	2.16608	0.000492542	up	0.877267	0.385355	unchanged	1.48342	0.109998	unchanged
XUT1653	TRUE	2.63189	0.000618068	up	3.59171	7.94552e-07	up	3.852	9.11901e-08	up	5.03295	3.78608e-05	up	5.53768	3.96967e-06	up
XUT1654	TRUE	2.96171	2.95555e-37	up	2.63032	2.53995e-28	up	3.83604	4.45176e-62	up	2.72524	7.96074e-23	up	3.7927	3.2249e-46	up
XUT1655	TRUE	1.24405	0.0185564	up	2.12774	1.70014e-05	up	2.00046	5.90367e-05	up	2.18331	0.000832692	up	2.41628	0.000128356	up
XUT1656	TRUE	2.60723	2.58898e-37	up	2.42977	2.35476e-31	up	3.3021	3.7997e-59	up	2.06596	4.13597e-13	up	3.35771	8.41143e-35	up
XUT1657	TRUE	4.04428	2.42769e-35	up	1.64854	8.68168e-06	up	4.56227	8.59236e-45	up	2.15893	7.73424e-06	up	4.47255	4.5121e-25	up
XUT1658	TRUE	2.38201	8.50263e-22	up	2.35474	1.32774e-20	up	2.94652	1.05295e-32	up	2.28284	2.0896e-12	up	3.00772	4.43427e-22	up
XUT1659	TRUE	4.1706	3.41704e-09	up	3.0991	2.07907e-05	up	5.05232	1.38204e-13	up	2.31137	0.0148192	up	4.71985	1.90641e-08	up
XUT1660	TRUE	2.94744	1.56671e-16	up	2.17865	4.92373e-09	up	3.43275	3.0592e-22	up	1.71931	0.000205537	up	2.79885	6.26261e-11	up
XUT1661	TRUE	1.54887	0.0182829	up	2.20306	0.000402622	up	2.8134	3.36419e-06	up	2.21778	0.013897	up	2.25553	0.00996583	up
XUT1662	TRUE	3.01019	0.028725	up	4.57797	0.000281132	up	5.23099	2.57581e-05	up	3.49461	0.0136689	up	4.12036	0.00252368	up
XUT1663	TRUE	2.64265	2.97791e-09	up	2.0639	7.20129e-06	up	3.26099	6.94596e-14	up	2.80405	1.74923e-06	up	3.43281	1.02409e-09	up
XUT1664	TRUE	2.48972	6.01686e-16	up	2.86627	1.04745e-20	up	3.74606	8.6843e-36	up	2.99964	4.14779e-12	up	4.29146	1.6255e-25	up
XUT1665	TRUE	3.15626	1.7237e-27	up	2.70945	1.30027e-19	up	3.78273	4.06873e-39	up	3.20323	4.91582e-20	up	3.75865	3.35816e-28	up
XUT1666	TRUE	2.8273	1.26774e-22	up	2.47222	5.57947e-17	up	3.55823	1.57987e-35	up	2.86136	5.9976e-16	up	3.76969	1.81535e-28	up
XUT1667	TRUE	2.43697	0.0112311	up	2.95715	0.00123062	up	3.53932	7.79835e-05	up	2.10387	0.064913	unchanged	2.58885	0.0169711	up
XUT1668	TRUE	2.04917	0.000414967	up	2.78909	5.02755e-07	up	3.29957	1.28239e-09	up	2.49021	0.000605536	up	3.26214	2.11921e-06	up
XUT1669	FALSE	1.18925	0.0762352	unchanged	2.68904	8.33876e-06	up	2.71378	6.77629e-06	up	2.16275	0.00294865	up	2.27027	0.00129243	up
XUT1670	TRUE	2.80136	0.00479458	up	3.54925	0.000158872	up	3.74246	6.05788e-05	up	3.16495	0.0083597	up	4.10845	0.000313308	up
XUT1671	TRUE	1.49338	0.129927	unchanged	2.22331	0.0146714	up	2.32943	0.010321	up	1.90265	0.124329	unchanged	2.46901	0.034359	up
XUT1672	TRUE	0.784371	0.117646	unchanged	1.56037	0.000746284	up	1.5272	0.00100461	up	1.30989	0.0611163	unchanged	1.95617	0.00270743	up
XUT1673	FALSE	-0.550236	0.725352	unchanged	2.79295	0.0108898	up	2.59246	0.019363	up	2.85014	0.0175099	up	3.12823	0.00706176	up
XUT1674	FALSE	1.36005	0.0962296	unchanged	0.966452	0.237727	unchanged	2.39223	0.0014316	up	1.30536	0.309232	unchanged	0.899378	0.483246	unchanged
XUT1675	FALSE	0.0659578	0.957545	unchanged	1.87187	0.0278538	up	1.70683	0.0476093	up	2.09795	0.0987709	unchanged	2.35634	0.0534662	unchanged
XUT1676	TRUE	2.44487	0.00223815	up	3.16386	3.24045e-05	up	4.13721	1.92996e-08	up	4.22518	1.87654e-05	up	4.51661	3.14218e-06	up
XUT1677	TRUE	1.65572	0.000701214	up	2.19288	3.02877e-06	up	3.0604	1.72799e-11	up	2.54038	2.24082e-05	up	3.45663	1.34408e-09	up
XUT1678	TRUE	2.23909	2.05952e-20	up	2.55341	8.09839e-26	up	3.10655	1.0809e-38	up	2.80389	4.10199e-20	up	2.86574	1.36243e-21	up
XUT1679	TRUE	2.57407	8.21918e-05	up	4.16341	8.52676e-12	up	4.65852	9.36444e-15	up	6.73993	9.15866e-06	up	7.05247	2.88918e-06	up
XUT1680	TRUE	1.80072	0.0153904	up	1.68487	0.0210491	up	2.12509	0.00289818	up	2.43584	0.00460627	up	3.20958	8.33458e-05	up
XUT1681	TRUE	3.20458	0.000122969	up	5.19813	1.92052e-11	up	5.37423	2.96583e-12	up	4.30827	2.05453e-08	up	4.58537	1.28547e-09	up
XUT1682	FALSE	0.583873	0.325656	unchanged	1.32076	0.0133189	up	1.18411	0.0282623	up	1.54797	0.0375068	up	1.75378	0.013903	up
XUT1683	TRUE	1.99867	6.31753e-08	up	2.59151	8.21968e-13	up	3.19804	1.62032e-19	up	2.57279	1.20284e-07	up	3.21199	5.13978e-12	up
XUT1684	TRUE	1.11476	0.00643911	up	2.27551	2.14292e-09	up	2.38892	2.69195e-10	up	1.94914	6.93414e-05	up	2.33282	6.80537e-07	up
XUT1685	TRUE	5.69092	0.00174241	up	5.68436	0.00114071	up	7.01764	3.65234e-05	up	4.04677	0.0535119	unchanged	6.07291	0.00146618	up
XUT1686	TRUE	4.31401	0.0178354	up	1.04489	0.644405	unchanged	5.17762	0.00232782	up	4.06557	0.0729698	unchanged	5.4307	0.0101704	up
XUT1687	TRUE	4.82875	0.00469573	up	3.06375	0.0795956	unchanged	5.5292	0.000578873	up	0	1	unchanged	5.4003	0.0132333	up
XUT1688	FALSE	0.304302	0.397501	unchanged	1.76384	9.73496e-09	up	1.82847	2.50827e-09	up	1.779	2.23224e-05	up	1.98983	9.27829e-07	up
XUT1690	FALSE	0.414185	0.676514	unchanged	-0.0692695	0.944278	unchanged	0.278252	0.759759	unchanged	0.8774	0.473785	unchanged	0.747145	0.529794	unchanged
XUT1691	TRUE	2.62052	3.05967e-08	up	2.20952	4.76848e-06	up	3.34671	3.36152e-13	up	2.62081	0.000380455	up	4.08715	2.21735e-09	up
XUT1692	FALSE	1.55125	0.0576443	unchanged	3.00787	4.78125e-05	up	3.48265	1.66343e-06	up	3.11883	0.000933251	up	3.36089	0.000246892	up
XUT1693	TRUE	2.85248	1.9826e-14	up	2.63372	2.68627e-12	up	3.3465	9.31774e-20	up	2.4883	5.83203e-08	up	3.01655	7.70016e-12	up
XUT1694	TRUE	0.699416	0.449709	unchanged	2.2656	0.00390932	up	2.13503	0.00700081	up	2.12149	0.108607	unchanged	3.42255	0.00501954	up
XUT1695	FALSE	1.13979	0.0746465	unchanged	2.22024	0.000154372	up	2.44816	2.5027e-05	up	1.55755	0.0800317	unchanged	2.47285	0.00276725	up
XUT1696	TRUE	1.22779	0.0941496	unchanged	2.22242	0.000964749	up	2.72767	3.59997e-05	up	2.94877	0.00185607	up	3.51871	0.000111594	up
XUT1697	TRUE	2.64124	0.00786897	up	3.37769	0.000325691	up	4.1555	5.76943e-06	up	4.27648	0.00247209	up	3.99355	0.00434522	up
XUT1698	FALSE	2.22689	0.0172529	up	3.58912	3.07694e-05	up	4.35731	2.29928e-07	up	5.64383	0.00166968	up	6.89179	6.76247e-05	up
XUT1699	FALSE	1.23283	0.285518	unchanged	3.31381	0.000750775	up	2.06889	0.0470708	up	1.69021	0.194103	unchanged	2.06203	0.0945883	unchanged
XUT1700	TRUE	3.16211	4.34844e-29	up	2.14685	6.25023e-13	up	3.58716	5.56389e-37	up	3.20459	7.20224e-18	up	4.30703	2.16331e-33	up
XUT1701	TRUE	1.92768	0.00805809	up	3.01793	8.73948e-06	up	3.45856	2.25799e-07	up	2.40861	0.00730136	up	3.2818	0.000108096	up
XUT1702	TRUE	2.16526	1.55244e-05	up	2.91383	1.55828e-09	up	3.08611	1.15555e-10	up	2.8546	1.12394e-05	up	3.64374	4.2784e-09	up
XUT1703	TRUE	2.91681	NA	NA	2.53583	0.505159	unchanged	2.30272	0.539783	unchanged	3.47078	0.334313	unchanged	2.04996	0.585919	unchanged
XUT1704	TRUE	1.77341	5.97133e-07	up	3.08938	6.61991e-20	up	3.18823	2.77066e-21	up	3.25945	1.07825e-11	up	3.85056	1.285e-16	up
XUT1705	TRUE	1.42679	4.02438e-05	up	2.75419	3.31141e-17	up	3.10612	5.8296e-22	up	3.89358	4.09444e-14	up	3.98972	4.01254e-15	up
XUT1706	FALSE	0.782801	0.344071	unchanged	2.17947	0.00235792	up	2.29285	0.0013151	up	1.90421	0.0502949	unchanged	1.62599	0.0899105	unchanged
XUT1707	TRUE	2.19239	6.72862e-14	up	2.66586	6.1366e-20	up	3.06337	1.37171e-26	up	2.66049	4.13532e-10	up	3.44775	3.0242e-17	up
XUT1709	FALSE	0.829059	0.498464	unchanged	1.49708	0.167282	unchanged	1.63975	0.128252	unchanged	0.236158	0.902201	unchanged	-1.28874	0.495578	unchanged
XUT1710	TRUE	1.81339	0.0455672	up	2.67344	0.0015604	up	2.82621	0.000775623	up	2.03951	0.0603026	unchanged	1.73697	0.104741	unchanged
XUT1711	TRUE	3.24517	1.13498e-26	up	2.64062	4.97131e-17	up	3.54676	2.09519e-31	up	3.02239	3.32234e-14	up	3.09275	2.75982e-15	up
XUT1712	FALSE	0.758554	0.343815	unchanged	2.90571	1.34934e-05	up	2.72913	4.95662e-05	up	2.51178	0.00478982	up	2.89393	0.000723119	up
XUT1713	TRUE	1.85987	0.000409833	up	2.50011	7.13782e-07	up	2.70827	6.14814e-08	up	2.83969	1.80432e-06	up	3.12097	6.52834e-08	up
XUT1714	TRUE	0.738705	0.547883	unchanged	1.23463	0.261895	unchanged	2.0237	0.0537543	unchanged	2.29029	0.0786247	unchanged	2.24849	0.0768781	unchanged
XUT1715	TRUE	2.41467	0.00103809	up	2.56267	0.000357154	up	2.96865	2.53971e-05	up	2.08037	0.0242899	up	2.82151	0.00113974	up
XUT1716	TRUE	1.82794	2.3532e-05	up	2.77096	1.91061e-11	up	2.97197	3.84999e-13	up	2.43716	8.31295e-07	up	2.72825	1.26807e-08	up
XUT1717	TRUE	1.82324	0.000785569	up	2.25047	1.82106e-05	up	2.65117	2.73581e-07	up	2.24034	0.00157524	up	2.72426	5.50249e-05	up
XUT1718	FALSE	0.541795	0.295563	unchanged	2.74399	2.48458e-10	up	2.03186	5.58036e-06	up	2.6896	2.70209e-05	up	2.84749	5.12858e-06	up
XUT1719	TRUE	0.801072	0.43398	unchanged	1.85326	0.0381122	up	1.59756	0.0789298	unchanged	1.83396	0.256343	unchanged	2.88141	0.0531987	unchanged
XUT1720	TRUE	1.29884	0.303277	unchanged	2.26172	0.0442158	up	2.14644	0.0584801	unchanged	1.0593	0.582449	unchanged	1.55157	0.381147	unchanged
XUT1721	TRUE	2.0742	0.0296458	up	3.8709	7.24146e-06	up	3.60132	3.43898e-05	up	5.12716	0.00180618	up	5.75273	0.00035097	up
XUT1722	TRUE	2.14445	2.50368e-17	up	1.47133	2.55532e-08	up	2.63802	9.40045e-26	up	1.7222	2.71224e-08	up	2.4173	1.98597e-16	up
XUT1723	TRUE	1.52786	0.000427935	up	0.768225	0.0807646	unchanged	1.86065	8.35389e-06	up	2.56552	1.27744e-07	up	2.57774	5.95087e-08	up
XUT1724	TRUE	1.67927	1.6624e-07	up	1.76777	3.47075e-08	up	2.38884	1.80099e-14	up	2.45494	1.62005e-10	up	2.77158	9.53604e-14	up
XUT1725	TRUE	1.42799	0.373969	unchanged	2.08096	0.147763	unchanged	2.06535	0.152823	unchanged	1.17987	0.610125	unchanged	2.86278	0.155978	unchanged
XUT1726	FALSE	2.00717	0.20819	unchanged	4.52958	0.000911518	up	4.53915	0.000885224	up	2.61411	0.0498217	up	1.63461	0.230682	unchanged
XUT1727	TRUE	2.28192	9.63323e-05	up	2.80516	7.27519e-07	up	3.97595	2.66819e-13	up	3.92603	0.000135085	up	5.79085	3.02728e-09	up
XUT1728	TRUE	1.5919	0.111059	unchanged	2.49204	0.00671387	up	2.65535	0.00365042	up	4.87593	0.00612399	up	4.24567	0.0168455	up
XUT1729	TRUE	1.0697	0.296578	unchanged	3.50962	3.87324e-05	up	3.80872	6.61562e-06	up	4.40816	0.00144351	up	4.59731	0.000725553	up
XUT1730	TRUE	2.89708	1.17407e-17	up	3.75653	3.12388e-29	up	3.89969	8.21156e-32	up	2.8475	3.44802e-13	up	3.05537	1.36164e-15	up
XUT1731	TRUE	1.10718	0.117221	unchanged	1.49116	0.0250889	up	1.70524	0.00972633	up	2.14872	0.0224347	up	2.51921	0.00518817	up
XUT1732	TRUE	2.16719	1.75233e-05	up	2.43487	8.46101e-07	up	3.0075	4.8253e-10	up	2.34031	8.03899e-05	up	2.77571	1.12735e-06	up
XUT1733	TRUE	3.55209	1.04927e-08	up	3.57785	6.03288e-09	up	4.34233	5.28451e-13	up	2.49104	0.000118238	up	3.24562	1.26611e-07	up
XUT1734	TRUE	1.57175	0.0102632	up	4.21955	4.44239e-15	up	4.41576	1.45633e-16	up	3.6077	2.52931e-08	up	3.7968	2.31038e-09	up
XUT1735	TRUE	2.11788	NA	NA	0	1	unchanged	0	1	unchanged	NA	NA	NA	NA	NA	NA
XUT1736	TRUE	NA	NA	NA	NA	NA	NA	NA	NA	NA	NA	NA	NA	NA	NA	NA
XUT1737	TRUE	2.24493	8.48649e-11	up	2.30221	3.83028e-11	up	2.80015	2.05302e-16	up	2.68281	6.26452e-08	up	3.46557	2.5893e-13	up
XUT1738	TRUE	2.58855	1.4416e-44	up	2.53356	1.39768e-41	up	3.20828	8.54037e-68	up	2.8495	4.81251e-34	up	3.55988	3.10915e-54	up
XUT1739	FALSE	1.09905	0.0135879	up	1.92383	4.30546e-06	up	1.85606	1.00306e-05	up	1.63548	0.00849163	up	2.20347	0.000170474	up
XUT1740	TRUE	2.95449	3.4527e-09	up	1.54842	0.00438055	up	3.23611	5.27444e-11	up	1.91575	0.0111755	up	3.7574	2.60781e-08	up
XUT1741	TRUE	2.17099	5.76393e-06	up	3.10732	1.31675e-11	up	3.45536	2.41772e-14	up	3.41913	1.59933e-07	up	3.77834	2.81353e-09	up
XUT1742	FALSE	2.58371	0.000732633	up	1.99365	0.010004	up	2.87564	0.000100286	up	3.27985	0.0051564	up	2.00048	0.0993687	unchanged
XUT1743	TRUE	1.23213	0.0731542	unchanged	2.30808	0.000256715	up	2.76822	7.75314e-06	up	1.42751	0.111547	unchanged	2.07393	0.0134431	up
XUT1745	FALSE	NA	NA	NA	NA	NA	NA	NA	NA	NA	NA	NA	NA	NA	NA	NA
XUT1746	FALSE	1.17826	0.000316064	up	1.82244	6.69403e-09	up	2.2703	1.67629e-13	up	2.3803	2.43219e-08	up	2.8928	1.81282e-12	up
XUT1747	TRUE	1.9346	8.12203e-05	up	1.93858	6.14192e-05	up	2.72871	5.67849e-09	up	3.25406	3.88253e-08	up	3.45863	2.28235e-09	up
XUT1748	TRUE	2.16461	8.29366e-05	up	2.04217	0.000189799	up	2.51734	2.44905e-06	up	2.39518	0.00177504	up	2.93754	5.63684e-05	up
XUT1749	FALSE	-0.0416211	0.971154	unchanged	2.51701	0.00070394	up	2.12942	0.00489873	up	1.81409	0.0802612	unchanged	1.8595	0.0642967	unchanged
XUT1750	TRUE	2.52734	5.86683e-35	up	2.93955	5.18756e-46	up	3.4148	3.84478e-63	up	2.77173	3.70765e-26	up	3.57005	5.87088e-45	up
XUT1751	TRUE	1.20819	0.00424449	up	2.54204	7.46086e-11	up	2.51051	1.30382e-10	up	2.12487	0.00022822	up	2.68257	1.02524e-06	up
XUT1752	FALSE	0	NA	NA	4.51174	0.0511011	unchanged	5.34989	0.0180892	up	5.04171	0.0300807	up	4.24514	0.0691138	unchanged
XUT1753	TRUE	2.3827	0.00198562	up	3.28865	6.1077e-06	up	3.09931	2.30388e-05	up	2.85409	0.00377611	up	3.92052	2.48916e-05	up
XUT1754	FALSE	-0.595752	0.65088	unchanged	1.22351	0.249973	unchanged	1.15041	0.284092	unchanged	2.35981	0.193016	unchanged	3.29982	0.0526158	unchanged
XUT1756	TRUE	1.89285	0.00906538	up	3.55609	7.86934e-08	up	3.42965	2.45804e-07	up	3.74141	0.000143942	up	4.26572	7.93989e-06	up
XUT1757	FALSE	-0.714313	0.325748	unchanged	1.80324	0.00212123	up	1.13186	0.0637362	unchanged	1.14881	0.169683	unchanged	0.562826	0.508077	unchanged
XUT1758	TRUE	3.00544	4.64519e-15	up	2.6172	2.4124e-11	up	3.05924	1.74212e-15	up	2.71276	6.38365e-08	up	3.15268	7.7238e-11	up
XUT1760	TRUE	1.37363	0.00780997	up	2.01067	4.28176e-05	up	2.18225	7.55287e-06	up	2.03888	0.00946861	up	2.74901	0.000209033	up
XUT1761	FALSE	0.362098	0.608744	unchanged	1.40949	0.0189621	up	1.58422	0.00789306	up	1.50935	0.0519703	unchanged	1.04094	0.179321	unchanged
XUT1763	TRUE	1.76695	5.68699e-05	up	2.53049	1.88666e-09	up	2.82343	1.13226e-11	up	2.68292	7.13465e-06	up	3.23862	1.63707e-08	up
XUT1764	TRUE	2.81057	1.22437e-06	up	2.82652	8.93649e-07	up	3.31575	3.96544e-09	up	2.50006	0.000545411	up	2.83211	4.82838e-05	up
XUT1765	TRUE	1.30779	0.148671	unchanged	1.7325	0.0413427	up	2.06699	0.0133728	up	2.00553	0.107738	unchanged	2.12275	0.0776601	unchanged
XUT1766	FALSE	0.154537	0.834408	unchanged	2.05094	0.000261112	up	1.67168	0.00355171	up	1.55346	0.0747971	unchanged	2.14991	0.0087755	up
XUT1767	TRUE	3.22925	0.000265416	up	2.14588	0.0184398	up	3.37557	8.17243e-05	up	1.44104	0.346205	unchanged	3.15813	0.0178841	up
XUT1768	TRUE	2.86817	0.00119396	up	2.15862	0.0155872	up	3.27394	0.00011269	up	2.64681	0.0402154	up	3.37063	0.00563305	up
XUT1769	TRUE	2.72975	5.06175e-07	up	2.38144	1.47247e-05	up	2.89213	6.79573e-08	up	1.7286	0.0411189	up	2.43597	0.00193394	up
XUT1770	TRUE	1.73366	0.0067396	up	2.00397	0.00122956	up	2.83014	2.12922e-06	up	3.03602	0.00049976	up	3.66664	1.12638e-05	up
XUT1772	TRUE	2.35989	8.753e-06	up	1.86265	0.000579315	up	2.67341	2.54303e-07	up	1.11413	0.112123	unchanged	1.83595	0.0044522	up
XUT1773	TRUE	1.92752	1.30752e-05	up	2.49518	6.24148e-09	up	2.78442	5.07929e-11	up	2.05661	0.000406972	up	2.69503	9.68248e-07	up
XUT1774	TRUE	2.31499	0.00473907	up	2.67685	0.000680525	up	2.81192	0.000333145	up	1.65575	0.167821	unchanged	2.35262	0.0357594	up
XUT1775	TRUE	0.957077	0.23512	unchanged	1.56808	0.0338057	up	1.88665	0.00957329	up	2.53675	0.0355924	up	2.75679	0.0184616	up
XUT1776	TRUE	3.49108	8.77495e-05	up	4.00897	2.81825e-06	up	4.72023	1.87617e-08	up	3.93534	0.000351898	up	4.64243	1.32879e-05	up
XUT1777	TRUE	3.143	0.00259256	up	3.40001	0.00072113	up	4.70562	1.14039e-06	up	1.88486	0.127829	unchanged	3.64565	0.000962764	up
XUT1778	TRUE	2.24733	3.4276e-07	up	3.431	4.1029e-16	up	3.75227	2.21943e-19	up	2.6353	2.24285e-06	up	3.32723	4.26486e-10	up
XUT1779	TRUE	1.27958	0.145822	unchanged	2.49361	0.00166167	up	2.92278	0.00017561	up	2.22289	0.036517	up	2.65536	0.00890322	up
XUT1780	TRUE	2.70495	7.11661e-06	up	3.1925	5.08437e-08	up	3.78107	4.42417e-11	up	2.36485	0.000743773	up	3.10327	2.79246e-06	up
XUT1781	FALSE	0.833577	0.309518	unchanged	1.07978	0.15787	unchanged	1.93695	0.00766309	up	0.306283	0.812181	unchanged	1.36707	0.20727	unchanged
XUT1782	TRUE	2.39095	6.55011e-10	up	2.38335	9.63287e-10	up	3.02391	1.57856e-15	up	2.82102	7.03149e-08	up	3.80796	1.89373e-14	up
XUT1783	TRUE	1.669	0.000335079	up	2.85501	6.59058e-11	up	3.07153	1.42189e-12	up	2.62425	8.63448e-07	up	2.3482	8.84292e-06	up
XUT1784	TRUE	2.66707	3.94466e-06	up	3.76785	8.64432e-12	up	4.12102	4.2987e-14	up	3.68098	3.89288e-06	up	4.54377	3.37661e-09	up
XUT1785	TRUE	2.69661	0.000762733	up	3.74947	6.85844e-07	up	3.56975	2.54672e-06	up	3.97299	6.74897e-05	up	3.99511	4.70004e-05	up
XUT1786	TRUE	1.26112	0.077994	unchanged	2.28473	0.00051646	up	2.38765	0.000270752	up	2.21422	0.0268764	up	2.45356	0.0109924	up
XUT1787	FALSE	-1.92146	NA	NA	2.03853	0.216001	unchanged	2.17328	0.186522	unchanged	4.48894	0.0531541	unchanged	4.73928	0.0352841	up
XUT1788	FALSE	3.08622	NA	NA	2.52927	0.425378	unchanged	3.59805	0.227565	unchanged	2.45465	0.653058	unchanged	0	1	unchanged
XUT1789	FALSE	0.0478174	0.957821	unchanged	1.68201	0.00736882	up	1.31096	0.0414603	up	0.659596	0.471215	unchanged	1.43573	0.0822712	unchanged
XUT1790	TRUE	1.73212	8.80447e-05	up	2.8794	5.08058e-12	up	3.09384	7.1156e-14	up	3.08618	3.24763e-07	up	3.81647	4.95636e-11	up
XUT1791	FALSE	0.506325	0.259885	unchanged	1.39991	0.000509064	up	1.2464	0.0021855	up	1.63835	0.00674835	up	1.57196	0.00761243	up
XUT1792	TRUE	1.19514	0.273248	unchanged	3.11411	0.000859237	up	3.11939	0.000849757	up	2.64841	0.0466151	up	3.6729	0.00329891	up
XUT1793	TRUE	1.55922	1.04779e-16	up	2.11377	9.80228e-30	up	2.37578	8.92889e-38	up	2.68336	9.33887e-34	up	2.95883	3.37986e-42	up
XUT1794	TRUE	1.84271	3.76817e-09	up	2.89158	1.33905e-21	up	2.78406	4.27615e-20	up	2.92707	1.26794e-10	up	3.31382	6.52858e-14	up
XUT1795	TRUE	0.35561	0.548563	unchanged	1.43204	0.00483245	up	1.48188	0.00351241	up	1.83048	0.0259319	up	1.89701	0.0170293	up
XUT1796	TRUE	2.04604	0.000384956	up	3.522	5.02656e-11	up	3.48578	7.7497e-11	up	3.95545	5.50817e-06	up	4.05343	2.17318e-06	up
XUT1797	TRUE	3.55174	6.10936e-23	up	2.73854	3.04741e-13	up	3.8759	4.34596e-27	up	2.84851	8.54849e-09	up	4.15116	5.11394e-19	up
XUT1798	TRUE	2.36998	0.000548275	up	3.23287	6.97788e-07	up	3.72444	5.95975e-09	up	4.71858	0.000171433	up	5.4093	1.03499e-05	up
XUT1799	FALSE	0.184415	0.852452	unchanged	2.78326	0.00011767	up	2.13433	0.00413882	up	2.2975	0.0339479	up	2.78344	0.00712011	up
XUT1802	TRUE	2.01744	5.28696e-11	up	2.10266	9.6567e-12	up	2.85113	2.07321e-21	up	2.59639	1.07018e-09	up	2.65064	2.25976e-10	up
XUT1803	TRUE	1.72501	0.0518794	unchanged	2.45492	0.00314251	up	2.77832	0.000704809	up	2.76018	0.00695424	up	2.54229	0.0116194	up
XUT1804	FALSE	-0.767667	NA	NA	0.446792	0.91141	unchanged	0.211287	0.957815	unchanged	0	1	unchanged	2.09484	0.698323	unchanged
XUT1807	TRUE	2.82947	6.13174e-16	up	2.48976	4.40854e-12	up	3.67941	1.00167e-26	up	2.86968	4.99935e-10	up	3.56855	8.11431e-16	up
XUT1808	TRUE	2.32876	7.98207e-20	up	2.39985	1.99924e-20	up	3.0886	2.64959e-34	up	2.47447	2.42634e-14	up	3.14125	8.12486e-24	up
XUT1809	TRUE	3.20093	5.80325e-07	up	2.58204	7.44803e-05	up	3.79269	9.75084e-10	up	2.74208	0.00108385	up	3.65595	4.00651e-06	up
XUT1811	FALSE	-2.17298	NA	NA	1.41577	0.635691	unchanged	1.47988	0.621115	unchanged	-0.58839	0.921903	unchanged	-1.11187	0.838737	unchanged
XUT1813	TRUE	1.67665	1.23124e-28	up	1.77697	2.30636e-32	up	2.36619	7.58566e-57	up	1.91797	7.16779e-38	up	2.27955	2.45047e-53	up

## Sheet: Figure 2 & S2
ID	xrn1/WT CSM log2 FC	xrn1/WT CSM adj P	xrn1/WT CSM DE	upf1/WT CSM log2 FC	upf1/WT CSM adj P	upf1/WT CSM DE	WT-CHX/WT CSM log2 FC	WT-CHX/WT CSM adj P	WT-CHX/WT CSM DE	WT-Glu/WT CSM log2 FC	WT-Glu/WT CSM adj P	WT-Glu/WT CSM DE	WT-heat/WT CSM log2 FC	WT-heat/WT CSM adj P	WT-heat/WT CSM DE
XUT0001	3.39011	1.27199e-09	up	1.42552	0.0326658	up	1.49651	0.18802	unchanged	-1.57204	0.397651	unchanged	-1.48395	0.00169841	down
XUT0002	2.89358	3.93653e-28	up	1.47867	1.85237e-07	up	2.0522	1.33564e-05	up	-0.0538077	0.953988	unchanged	-0.684756	0.00568477	unchanged
XUT0003	2.92643	8.6351e-31	up	1.58938	4.72301e-09	up	2.08338	1.38904e-06	up	0.42041	0.515011	unchanged	-0.519526	0.00499128	unchanged
XUT0004	2.91433	6.80137e-05	up	0.814741	0.410506	unchanged	2.09542	0.128902	unchanged	-0.31867	NA	NA	-0.855988	0.282358	unchanged
XUT0005	2.68784	2.95057e-19	up	1.15108	0.000672391	up	1.42854	0.0102025	up	-1.91183	0.0105099	down	-0.461853	0.0584314	unchanged
XUT0006	1.70139	0.0821772	unchanged	0.731233	0.573441	unchanged	3.53215	0.0312247	up	1.03011	NA	NA	0.461327	0.682319	unchanged
XUT0007	2.59725	7.26613e-08	up	-0.0283756	0.972315	unchanged	1.60324	0.0989266	unchanged	0.782271	0.580712	unchanged	0.753555	0.031335	unchanged
XUT0008	2.60518	5.64664e-09	up	1.31982	0.0104124	up	1.88187	0.0013626	up	1.40469	0.0394598	up	-0.632838	0.224882	unchanged
XUT0009	2.16828	0.000375188	up	1.70059	0.0117104	up	3.88635	0.000393176	up	-0.383514	0.867192	unchanged	-0.521352	0.253693	unchanged
XUT0010	1.56772	0.0739501	unchanged	0.139112	0.918115	unchanged	2.27558	0.0682979	unchanged	-1.65934	NA	NA	-0.025423	0.979523	unchanged
XUT0011	1.97631	0.224874	unchanged	0.653019	1	unchanged	-1.33616	NA	NA	-1.50313	NA	NA	-1.08997	0.842749	unchanged
XUT0012	2.86654	7.55235e-05	up	1.02495	0.272619	unchanged	2.49875	0.0992184	unchanged	-0.363982	NA	NA	-0.498034	0.532116	unchanged
XUT0013	2.95006	3.03215e-11	up	1.35373	0.00851546	up	2.54778	0.00551844	up	0.782393	0.57924	unchanged	1.10904	0.0114561	up
XUT0014	2.99913	2.78275e-72	up	1.57716	1.46922e-19	up	2.2883	2.22207e-13	up	0.375224	0.397486	unchanged	-0.0665216	0.841452	unchanged
XUT0015	3.99553	2.09877e-05	up	3.13269	0.00263193	up	3.95476	0.00854561	up	0.981094	NA	NA	-0.413572	0.613482	unchanged
XUT0016	3.03085	0.347437	unchanged	3.28446	1	unchanged	1.62527	NA	NA	1.59327	NA	NA	-0.973232	0.816393	unchanged
XUT0017	2.28511	2.54254e-17	up	2.54995	2.34164e-21	up	3.14097	4.82008e-11	up	0.536681	0.462956	unchanged	0.56049	0.0459673	unchanged
XUT0020	1.92582	1.36873e-08	up	0.255065	0.596806	unchanged	1.70847	0.00312161	up	-0.687953	0.434645	unchanged	-2.47347	6.81143e-09	down
XUT0021	2.59651	0.0131813	up	0.736403	0.615419	unchanged	3.62462	0.175013	unchanged	2.33388	NA	NA	0.271175	0.82776	unchanged
XUT0022	4.14563	0.0998141	unchanged	1.2775	1	unchanged	1.62548	0.668637	unchanged	1.56078	NA	NA	0.266216	0.912237	unchanged
XUT0023	3.33086	2.15653e-09	up	1.17475	0.088672	unchanged	3.95674	0.000822934	up	1.31345	0.460905	unchanged	-0.0526293	0.960528	unchanged
XUT0024	2.16435	0.0462716	up	0.0384389	0.981693	unchanged	1.10731	0.637158	unchanged	0.0680559	NA	NA	-1.5009	0.134976	unchanged
XUT0025	1.33783	0.272198	unchanged	0.318236	1	unchanged	4.94988	0.0303952	up	2.56765	NA	NA	-2.01746	0.0884878	unchanged
XUT0026	3.73228	7.3206e-06	up	2.27643	0.0179138	up	3.22944	0.0488385	up	0.526431	NA	NA	-2.36587	0.134256	unchanged
XUT0027	3.12235	6.79746e-06	up	1.00102	0.269081	unchanged	1.50592	0.232816	unchanged	0.259281	NA	NA	-1.14782	0.0935794	unchanged
XUT0029	0.650988	0.507708	unchanged	-0.590016	0.652836	unchanged	0.0333036	0.983621	unchanged	-4.89722	NA	NA	1.64878	0.423609	unchanged
XUT0031	3.19926	6.39798e-06	up	0.762641	0.4376	unchanged	1.61465	0.191629	unchanged	-0.8025	NA	NA	-1.75028	0.000823484	down
XUT0032	3.50286	0.0227449	up	1.98517	1	unchanged	3.94787	0.147381	unchanged	2.32958	NA	NA	-0.578366	0.696548	unchanged
XUT0033	2.9646	5.19955e-14	up	1.32354	0.00356236	up	2.61238	0.00114823	up	0.356116	0.800833	unchanged	-0.0872237	0.871748	unchanged
XUT0034	2.04587	0.00043527	up	0.912107	0.2028	unchanged	2.04932	0.0609703	unchanged	-0.0249512	0.995576	unchanged	-1.80841	0.00198936	down
XUT0035	4.23009	4.53683e-33	up	2.01675	2.29773e-07	up	2.96484	0.00012088	up	-1.98779	0.162298	unchanged	-0.112183	0.857177	unchanged
XUT0037	4.04012	1.09971e-23	up	2.11834	1.7544e-06	up	3.2842	8.19392e-05	up	0.854474	0.505345	unchanged	-1.14083	0.0209324	down
XUT0038	1.82464	0.000100176	up	-0.335425	0.627718	unchanged	1.94814	0.0132138	up	-2.77547	0.0382228	down	0.164872	0.84265	unchanged
XUT0039	2.66314	7.18658e-05	up	1.23039	0.13285	unchanged	1.2526	0.290257	unchanged	-1.3076	NA	NA	0.389785	0.620478	unchanged
XUT0040	2.74739	4.24218e-09	up	1.62016	0.00200136	up	1.75879	0.0436472	up	-0.397851	0.794181	unchanged	2.69596	5.50924e-06	up
XUT0041	3.35356	4.86382e-15	up	1.0717	0.0408772	up	1.84499	0.110713	unchanged	-0.44017	0.832562	unchanged	-2.6232	2.00104e-06	down
XUT0042	0.373107	0.658771	unchanged	1.49304	0.0771192	unchanged	2.28394	0.108799	unchanged	1.6601	NA	NA	2.36974	1.06151e-05	up
XUT0043	2.187	0.00779302	up	0.912745	0.388775	unchanged	2.09185	0.185532	unchanged	-3.76482	NA	NA	-1.42186	0.115619	unchanged
XUT0044	1.31947	0.0110496	up	0.563927	0.389311	unchanged	0.308853	0.776211	unchanged	0.30343	0.856188	unchanged	2.02857	0.0004061	up
XUT0045	3.1385	7.58197e-19	up	1.3643	0.000716905	up	2.31998	0.00090361	up	-0.735444	0.52832	unchanged	-1.65948	8.67544e-05	down
XUT0046	2.73317	6.80828e-06	up	1.31549	0.0697727	unchanged	2.11262	0.0152313	up	-1.36427	0.336372	unchanged	-0.783003	0.0314485	unchanged
XUT0047	3.49422	1.54404e-110	up	2.08915	2.17278e-38	up	2.75912	9.31911e-18	up	-0.807228	0.0499645	unchanged	-0.570984	0.0593669	unchanged
XUT0048	1.77908	0.0122945	up	0.269941	0.798578	unchanged	1.76773	0.178452	unchanged	0.224098	NA	NA	-1.3979	0.102925	unchanged
XUT0049	1.63947	0.0170318	up	0.0626184	0.955443	unchanged	1.84777	0.173483	unchanged	-0.318585	NA	NA	-2.36008	9.28823e-06	down
XUT0050	2.30368	5.16026e-14	up	1.53568	2.70932e-06	up	3.20098	8.74569e-10	up	-0.512727	0.570744	unchanged	0.504487	0.253224	unchanged
XUT0051	3.70743	6.12134e-31	up	1.9163	3.76895e-08	up	2.49973	1.21631e-05	up	-1.83502	0.0338012	down	-1.45381	0.000220312	down
XUT0052	2.61027	6.52884e-07	up	0.0432764	0.962634	unchanged	1.78804	0.0508038	unchanged	0.288346	0.853667	unchanged	1.52032	0.0209984	up
XUT0053	2.71075	4.19399e-13	up	0.944874	0.0369802	unchanged	0.63439	0.426198	unchanged	2.39232	0.0016615	up	3.36998	4.66331e-30	up
XUT0054	2.50548	0.0046637	up	0.728947	0.554753	unchanged	3.77133	0.00259293	up	1.39616	0.446621	unchanged	0.0578231	0.928751	unchanged
XUT0055	2.44535	0.000104509	up	0.138765	0.893696	unchanged	2.55465	0.00497865	up	0.778818	0.578662	unchanged	2.49341	4.82844e-07	up
XUT0056	4.12241	2.42954e-16	up	2.53824	3.89968e-06	up	2.53021	0.00622868	up	-0.548962	0.745594	unchanged	1.87246	1.878e-05	up
XUT0057	3.64319	4.38148e-114	up	2.20453	1.62748e-40	up	2.70029	2.72923e-16	up	-0.91551	0.0325258	unchanged	-1.15591	3.56102e-11	down
XUT0058	3.27892	0.0043628	up	1.61702	0.266367	unchanged	0.793517	0.616549	unchanged	-0.599814	NA	NA	1.69034	0.00416042	up
XUT0059	5.09486	0.00640872	up	3.6012	1	unchanged	3.04443	0.0891622	unchanged	-0.902256	NA	NA	2.6457	0.00203548	up
XUT0060	3.25522	1.18822e-51	up	2.0402	8.50423e-20	up	2.81147	1.18707e-11	up	-0.792631	0.197585	unchanged	-0.935133	3.07898e-05	unchanged
XUT0061	0.700793	0.48451	unchanged	0.0926071	0.951028	unchanged	1.3505	0.486548	unchanged	-3.42732	NA	NA	-0.948598	0.301906	unchanged
XUT0062	1.81509	0.0023208	up	-0.0642639	0.948937	unchanged	1.2391	0.2641	unchanged	-0.625513	0.733719	unchanged	-1.18939	0.0675252	unchanged
XUT0063	1.86068	0.000570975	up	0.849449	0.198574	unchanged	1.9209	0.0731489	unchanged	-3.30912	0.126375	unchanged	0.385289	0.578946	unchanged
XUT0064	2.69521	0.0092483	up	-1.17099	0.492933	unchanged	2.47038	0.117175	unchanged	-1.99149	NA	NA	-0.90891	0.15546	unchanged
XUT0065	3.80555	1.10065e-05	up	3.16277	0.000815881	up	6.53282	0.000248329	up	4.01014	0.0682531	unchanged	0.287409	0.774167	unchanged
XUT0066	4.18869	9.82327e-25	up	2.28248	3.36354e-07	up	3.46103	2.74379e-06	up	-0.372398	0.80194	unchanged	-1.89009	1.83027e-05	down
XUT0067	2.42795	0.00939343	up	1.41964	0.214072	unchanged	3.46198	0.0351218	up	0.0465945	NA	NA	1.38432	0.258957	unchanged
XUT0068	2.69294	0.00531802	up	1.13296	0.369363	unchanged	2.62254	0.115523	unchanged	-0.723273	NA	NA	1.5694	0.0746178	unchanged
XUT0069	3.14158	2.10389e-12	up	2.19131	5.38346e-06	up	3.25821	4.37688e-06	up	-0.264218	0.848682	unchanged	1.73024	0.0019647	up
XUT0070	2.10569	0.000158707	up	0.739034	0.30018	unchanged	1.84483	0.0749841	unchanged	-0.527809	0.767474	unchanged	0.276977	0.719152	unchanged
XUT0071	1.59152	2.99901e-06	up	0.0322716	0.954539	unchanged	1.08791	0.0914796	unchanged	-1.08859	0.221166	unchanged	-0.800041	0.0117546	unchanged
XUT0072	2.42549	2.65964e-06	up	0.826837	0.207455	unchanged	1.43017	0.0660518	unchanged	1.0213	0.308338	unchanged	2.03317	4.45707e-06	up
XUT0073	1.47071	0.133098	unchanged	0.250363	0.862259	unchanged	1.68724	0.200251	unchanged	-0.956992	NA	NA	0.394263	0.498484	unchanged
XUT0075	1.97665	0.00126878	up	0.79355	0.307767	unchanged	0.748103	0.474828	unchanged	-1.2953	0.388247	unchanged	-1.45773	0.000569029	down
XUT0076	2.59248	1.11068e-17	up	0.718808	0.0497031	unchanged	1.69859	0.00474742	up	-0.283577	0.778236	unchanged	1.34471	0.000400806	up
XUT0078	1.24332	0.0964352	unchanged	0.381564	0.711946	unchanged	2.83316	0.0449226	up	0.718096	NA	NA	0.501979	0.455904	unchanged
XUT0079	1.85579	0.00230166	up	-0.43167	0.629797	unchanged	1.99096	0.0830508	unchanged	0.73229	0.684008	unchanged	-0.764811	0.360398	unchanged
XUT0080	4.1035	0.0387651	up	2.27986	1	unchanged	2.1692	0.307254	unchanged	1.62009	NA	NA	-0.947567	0.822216	unchanged
XUT0081	4.28645	2.08467e-37	up	2.34947	7.72397e-11	up	2.02305	0.000180636	up	-0.283746	0.760068	unchanged	-1.71259	1.5199e-09	down
XUT0082	6.17932	0.0029669	up	1.2587	1	unchanged	1.63116	NA	NA	0	NA	NA	-1.08997	0.842749	unchanged
XUT0083	4.10547	4.9245e-181	up	1.92451	1.27987e-38	up	2.18702	3.65485e-12	up	-1.68096	1.30711e-05	down	-2.88035	2.17445e-80	down
XUT0085	1.08986	0.229051	unchanged	0.297038	0.817375	unchanged	1.94096	0.285814	unchanged	1.71755	NA	NA	3.63022	3.87803e-10	up
XUT0086	2.25846	6.97084e-15	up	2.65259	1.98663e-20	up	2.49451	3.05391e-08	up	0.742835	0.222298	unchanged	1.94976	4.70257e-13	up
XUT0087	4.22833	2.30114e-26	up	1.66865	0.000286819	up	1.63745	0.0116981	up	0.834306	0.338603	unchanged	1.02044	0.0028882	up
XUT0088	3.06419	5.56689e-09	up	1.3121	0.0359965	up	3.17154	0.0202589	up	0.0259678	NA	NA	-1.50414	0.00996429	down
XUT0089	3.04872	0.000877988	up	1.41987	0.218493	unchanged	1.43218	0.322542	unchanged	-0.0193396	NA	NA	-0.806611	0.399817	unchanged
XUT0092	1.82204	0.000220667	up	0.318822	0.645216	unchanged	1.30099	0.126259	unchanged	-1.4144	0.249034	unchanged	-1.13657	0.0238938	down
XUT0093	2.19802	0.000489692	up	0.547201	0.523334	unchanged	1.77417	0.205551	unchanged	-1.77501	NA	NA	-1.04414	0.0892236	unchanged
XUT0094	2.31086	0.000667511	up	1.47976	0.0600338	unchanged	2.22732	0.0346518	up	-0.461911	0.811413	unchanged	-0.233222	0.680818	unchanged
XUT0095	1.85809	0.035184	up	1.78562	0.068789	unchanged	2.50573	0.0549074	unchanged	0.360705	NA	NA	0.533622	0.361949	unchanged
XUT0096	2.42872	0.000604265	up	0.989466	0.272629	unchanged	1.75661	0.170128	unchanged	0.231863	NA	NA	0.570309	0.222821	unchanged
XUT0097	4.03171	0.00572355	up	1.14952	1	unchanged	2.62694	0.422136	unchanged	1.41479	NA	NA	0.663672	0.376205	unchanged
XUT0098	2.79711	1.57025e-18	up	1.08538	0.0030886	up	1.9908	0.00303491	up	-0.0769599	0.955999	unchanged	-0.160413	0.686321	unchanged
XUT0099	3.38055	2.55633e-46	up	1.54036	2.30507e-09	up	2.44924	3.65251e-10	up	0.421004	0.470132	unchanged	0.2105	0.389055	unchanged
XUT0101	3.84395	2.44046e-24	up	2.45853	1.04895e-09	up	2.2327	0.00546544	up	-0.201193	0.895415	unchanged	-0.76852	0.0415176	unchanged
XUT0102	3.68866	8.21693e-49	up	2.25869	9.03142e-18	up	3.3565	1.20596e-12	up	-0.320503	0.713133	unchanged	-0.906631	0.000736212	unchanged
XUT0103	2.53429	0.0166463	up	0.213509	0.902218	unchanged	1.99142	0.210948	unchanged	-3.42623	NA	NA	-0.657197	0.506692	unchanged
XUT0104	3.09858	1.28098e-18	up	1.74619	5.38132e-06	up	2.19655	0.00018962	up	-1.16025	0.189973	unchanged	-0.148716	0.888592	unchanged
XUT0105	3.18344	9.19777e-40	up	1.3988	1.45618e-07	up	2.92225	4.43671e-11	up	1.53493	0.00228244	up	2.11249	2.13808e-08	up
XUT0106	0.625309	0.313021	unchanged	0.53307	0.473932	unchanged	2.71158	0.0120641	up	1.46043	0.313697	unchanged	4.14187	0.000181386	up
XUT0107	2.82225	8.0437e-08	up	1.23055	0.0503476	unchanged	2.79188	0.00845921	up	-0.0337342	0.992922	unchanged	0.555687	0.332414	unchanged
XUT0108	2.83131	0.000163179	up	2.42717	0.00310559	up	2.14255	0.0653365	unchanged	1.15549	0.479844	unchanged	1.50612	2.7037e-05	up
XUT0109	1.73384	5.7092e-23	up	0.0704008	0.78972	unchanged	1.43236	0.000586928	up	-0.389764	0.530658	unchanged	0.264213	0.164194	unchanged
XUT0110	2.29127	0.000654773	up	1.20115	0.13741	unchanged	2.31902	0.116356	unchanged	-0.0148013	NA	NA	-0.39302	0.689538	unchanged
XUT0111	3.27031	1.32645e-44	up	1.89196	1.41444e-14	up	2.22733	6.86061e-05	up	-0.926774	0.268788	unchanged	-2.44275	6.7191e-26	down
XUT0112	3.10418	3.64913e-08	up	1.14688	0.101533	unchanged	1.54502	0.101118	unchanged	-0.161264	0.926954	unchanged	0.208352	0.685491	unchanged
XUT0113	2.15148	0.000138065	up	0.88899	0.204231	unchanged	1.63268	0.213465	unchanged	-0.83192	NA	NA	-2.18732	4.50439e-09	down
XUT0114	2.31601	9.0345e-08	up	-0.112528	0.872342	unchanged	0.477003	0.653443	unchanged	-0.286608	0.869209	unchanged	-0.991972	0.113592	unchanged
XUT0115	4.07754	4.31389e-105	up	1.83906	2.33411e-20	up	2.07908	4.07986e-08	up	-1.67886	0.000618116	down	-2.5038	3.99702e-29	down
XUT0116	4.83465	5.40298e-05	up	4.77514	0.000206425	up	1.9536	0.0768029	unchanged	-5.01236	0.0154044	down	-1.65339	0.206528	unchanged
XUT0117	3.29484	0.00203616	up	2.76673	0.0209987	up	3.58335	0.0132579	up	-1.60785	NA	NA	-1.63104	0.474531	unchanged
XUT0118	3.12465	6.6e-09	up	1.08607	0.104466	unchanged	1.79263	0.0386936	up	-0.478945	0.747104	unchanged	-1.72084	0.000205362	down
XUT0119	1.43785	0.014053	up	-0.718373	0.367215	unchanged	2.23845	0.0416884	up	-2.27143	0.225993	unchanged	2.53864	0.000878117	up
XUT0120	1.96098	0.00221127	up	0.713412	0.389955	unchanged	0.183142	0.888978	unchanged	-0.434592	NA	NA	-0.113694	0.860188	unchanged
XUT0121	4.03033	6.9715e-07	up	0.187579	0.895808	unchanged	2.39091	0.137384	unchanged	2.41178	NA	NA	1.46304	0.145468	unchanged
XUT0122	4.33098	3.12498e-17	up	2.85108	2.67354e-07	up	3.65551	8.74353e-07	up	1.949	0.02896	up	-0.889986	0.00323491	unchanged
XUT0123	3.37997	1.59707e-07	up	2.00563	0.00617032	up	3.073	0.0180453	up	1.57926	0.380883	unchanged	0.366994	0.762243	unchanged
XUT0124	3.44471	4.84529e-11	up	1.82678	0.00216242	up	2.47494	0.01348	up	0.63094	0.70427	unchanged	0.329231	0.610487	unchanged
XUT0125	4.62317	3.90855e-17	up	2.86623	1.73099e-06	up	2.64416	0.0555594	unchanged	0.0173502	NA	NA	-0.263472	0.763465	unchanged
XUT0126	2.99951	2.6644e-09	up	0.967461	0.122045	unchanged	1.82335	0.0357411	up	-0.195093	0.904074	unchanged	-1.75424	0.000218008	down
XUT0127	2.92485	4.86953e-09	up	2.07457	0.000136654	up	2.74945	0.00174114	up	-2.43181	0.144053	unchanged	-1.58954	0.024991	down
XUT0128	1.75701	0.0557146	unchanged	1.78503	0.0818245	unchanged	2.31907	0.153176	unchanged	-3.46336	NA	NA	-0.958947	0.5103	unchanged
XUT0129	2.79174	1.77922e-44	up	1.40794	3.47138e-11	up	2.24678	1.37097e-08	up	-1.43058	0.0067426	down	-1.20107	1.95395e-05	down
XUT0130	2.69601	5.2192e-09	up	2.22098	5.83646e-06	up	2.65886	0.0250273	up	0.656572	0.73887	unchanged	-2.48367	5.47168e-09	down
XUT0131	4.03928	1.67267e-17	up	1.55729	0.00556753	up	2.7652	0.00676981	up	-2.02404	0.282641	unchanged	-0.391182	0.47282	unchanged
XUT0132	3.01482	5.39475e-09	up	2.81116	1.7793e-07	up	3.29369	3.81346e-05	up	1.8114	0.0636677	unchanged	-0.786547	0.0870915	unchanged
XUT0134	4.04901	2.03655e-91	up	2.13756	2.72355e-24	up	2.48367	2.33235e-08	up	0.279724	0.707339	unchanged	-0.789771	0.00157974	unchanged
XUT0135	2.07596	0.0254852	up	0.960633	0.421374	unchanged	3.56175	0.0511318	unchanged	-0.0210706	NA	NA	-0.689123	0.469663	unchanged
XUT0136	2.22874	0.0165976	up	1.26047	0.273343	unchanged	4.92824	0.0068515	up	2.59416	0.287599	unchanged	-0.858701	0.296964	unchanged
XUT0137	2.90227	3.99902e-17	up	0.803881	0.0581274	unchanged	2.81463	4.90474e-05	up	0.0760155	0.959526	unchanged	1.74159	2.02787e-05	up
XUT0138	0.752085	0.35457	unchanged	-1.12494	0.277392	unchanged	0.664185	0.665281	unchanged	-0.715863	NA	NA	-0.659592	0.658851	unchanged
XUT0140	1.64396	1.40672e-05	up	0.394144	0.428455	unchanged	1.13138	0.17853	unchanged	-0.79081	0.53459	unchanged	0.36955	0.744737	unchanged
XUT0141	1.94955	2.81015e-05	up	0.323485	0.62302	unchanged	1.8272	0.0112339	up	-0.956387	0.385748	unchanged	-1.17133	0.00184105	down
XUT0142	3.23351	6.68574e-16	up	1.07375	0.0264094	up	2.41833	0.000402573	up	-0.106362	0.938002	unchanged	-0.185842	0.685254	unchanged
XUT0143	3.39692	2.96228e-17	up	1.96195	8.94034e-06	up	2.10541	0.00300094	up	0.488067	0.672562	unchanged	1.24561	0.000237863	up
XUT0144	1.591	0.0368585	up	0.614372	0.54157	unchanged	0.991649	0.533377	unchanged	1.02299	NA	NA	1.44057	0.0190423	up
XUT0145	3.24734	3.75766e-13	up	1.17289	0.0300527	up	2.25453	0.0155506	up	0.0973893	0.960139	unchanged	-0.869728	0.204779	unchanged
XUT0146	1.09502	0.251339	unchanged	-0.0916991	0.951028	unchanged	1.84683	0.214361	unchanged	-1.57204	NA	NA	-2.13971	0.192554	unchanged
XUT0147	4.13612	2.09593e-85	up	2.44329	1.33987e-28	up	3.14439	2.35998e-11	up	-0.837669	0.254741	unchanged	-1.3318	9.51036e-08	down
XUT0148	2.64651	0.00107593	up	0.518131	0.66467	unchanged	0.367852	0.759721	unchanged	0.745877	0.653484	unchanged	0.358279	0.683188	unchanged
XUT0149	3.88868	4.66598e-16	up	1.61068	0.0042423	up	3.13886	0.000462151	up	0.188212	0.91719	unchanged	-0.463424	0.314279	unchanged
XUT0150	2.48058	1.7882e-06	up	0.701626	0.301799	unchanged	2.97354	0.00528027	up	-0.590076	0.770084	unchanged	-2.08085	2.50982e-05	down
XUT0151	2.36731	3.58376e-05	up	0.374803	0.652081	unchanged	2.20437	0.0527395	unchanged	0.454473	0.813686	unchanged	-0.854711	0.182062	unchanged
XUT0152	2.11547	0.0136684	up	-0.798525	0.539519	unchanged	1.35962	0.229132	unchanged	-0.749275	0.693294	unchanged	-0.26605	0.780748	unchanged
XUT0153	1.86225	1.24012e-05	up	1.00289	0.0416459	up	1.69207	0.0274401	up	0.399096	0.747884	unchanged	-0.130416	0.743512	unchanged
XUT0154	1.65972	0.0176074	up	0.297168	0.771156	unchanged	2.38888	0.0269319	up	1.04602	0.502285	unchanged	1.14808	0.0312191	up
XUT0155	5.73164	0.0046365	up	3.26501	1	unchanged	1.63054	NA	NA	1.40696	NA	NA	2.93208	0.18199	unchanged
XUT0156	3.59667	3.20559e-20	up	1.61594	0.000273993	up	2.28469	0.000554024	up	-0.853064	0.421361	unchanged	-0.346103	0.48634	unchanged
XUT0157	2.98239	1.12013e-07	up	0.654233	0.39653	unchanged	1.33736	0.200768	unchanged	1.1288	0.414058	unchanged	0.644915	0.108614	unchanged
XUT0158	2.73351	0.0616287	unchanged	-0.173226	1	unchanged	1.73288	0.533215	unchanged	0.983772	NA	NA	0.0567855	0.978028	unchanged
XUT0159	1.56945	0.098778	unchanged	-0.169684	0.911347	unchanged	0.891754	0.584023	unchanged	-4.04072	NA	NA	0.235008	0.783377	unchanged
XUT0160	3.56123	8.49213e-08	up	1.68299	0.0334536	up	2.4643	0.0760739	unchanged	-0.0958484	NA	NA	-0.779653	0.301269	unchanged
XUT0161	2.78207	1.3537e-08	up	0.482112	0.482808	unchanged	3.61155	1.00536e-05	up	0.176521	0.916188	unchanged	-0.446649	0.119952	unchanged
XUT0162	2.8979	0.00423966	up	0.942301	0.494607	unchanged	5.21014	0.0244504	up	1.4267	NA	NA	0.0620456	0.962066	unchanged
XUT0163	1.07596	0.226778	unchanged	-0.348996	0.786491	unchanged	1.54436	0.388416	unchanged	-2.28494	NA	NA	-1.36247	0.264321	unchanged
XUT0164	3.53428	6.95224e-06	up	1.54824	0.111658	unchanged	2.04518	0.141662	unchanged	1.21189	NA	NA	1.26064	0.0166103	up
XUT0165	2.72012	0.000421887	up	0.674081	0.5325	unchanged	1.50454	0.341578	unchanged	0.0187009	NA	NA	0.998993	0.322174	unchanged
XUT0166	3.09317	6.36679e-66	up	1.10369	2.5619e-08	up	1.56495	9.76791e-06	up	-0.0430808	0.951247	unchanged	-0.249312	0.169543	unchanged
XUT0167	3.65801	2.21643e-17	up	2.01185	2.53615e-05	up	1.83866	0.0159204	up	-0.084583	0.957162	unchanged	-1.28026	0.0096365	down
XUT0169	2.39356	7.6441e-06	up	2.0741	0.000301791	up	3.64525	0.000236467	up	-0.96995	0.615686	unchanged	-1.74438	2.95529e-07	down
XUT0170	2.45483	4.09701e-28	up	0.567574	0.0362491	unchanged	1.54696	0.00011821	up	-0.225963	0.737736	unchanged	-0.0925591	0.819604	unchanged
XUT0171	2.30572	0.00040146	up	-0.29085	0.786925	unchanged	2.91613	0.0108281	up	2.90321	0.0228484	up	7.42733	1.56405e-07	up
XUT0172	3.2157	1.50032e-06	up	0.739516	0.435671	unchanged	2.91761	0.00864829	up	3.01731	0.013453	up	6.30187	2.11129e-07	up
XUT0173	2.53015	3.10534e-06	up	0.248276	0.767518	unchanged	1.05803	0.39912	unchanged	0.435061	NA	NA	3.39813	5.12728e-22	up
XUT0174	4.07895	4.58929e-06	up	2.03573	0.0559468	unchanged	2.71695	0.137469	unchanged	-0.129648	NA	NA	-0.136284	0.890074	unchanged
XUT0175	1.74628	0.0674935	unchanged	0.405131	0.770161	unchanged	0.989831	0.565402	unchanged	-0.360459	NA	NA	-0.659339	0.568464	unchanged
XUT0176	1.14925	0.00589069	up	1.49597	0.000491646	up	2.52097	2.26415e-05	up	-1.59755	0.0790767	unchanged	-0.99437	0.0195803	unchanged
XUT0178	3.70594	5.75392e-19	up	2.20361	1.19947e-06	up	3.07018	9.34562e-08	up	0.687327	0.424543	unchanged	0.454139	0.336948	unchanged
XUT0179	2.46727	9.57242e-11	up	1.75919	1.703e-05	up	2.9078	2.47829e-05	up	0.308998	0.80194	unchanged	-0.148648	0.741035	unchanged
XUT0180	3.02447	8.08402e-14	up	1.92073	1.2839e-05	up	2.68707	0.000423918	up	-0.220547	0.880435	unchanged	-2.01035	2.02054e-07	down
XUT0181	1.91576	0.0295225	up	-0.886631	0.506121	unchanged	5.43263	0.00199138	up	2.45161	0.360854	unchanged	4.78146	2.19273e-27	up
XUT0182	4.10354	2.44635e-06	up	1.85502	0.0807147	unchanged	5.20067	0.00810032	up	0.00625592	NA	NA	-2.95118	0.0533595	unchanged
XUT0183	5.29717	1.76339e-05	up	3.96003	0.00418768	up	3.74253	0.097982	unchanged	0.886412	NA	NA	-2.81941	0.0165072	down
XUT0184	3.76879	4.84031e-10	up	1.88749	0.00688953	up	1.32454	0.323853	unchanged	-1.54957	NA	NA	-0.105077	0.891088	unchanged
XUT0185	2.25412	0.129678	unchanged	3.37789	0.0295935	up	3.65754	0.0651539	unchanged	1.97678	NA	NA	-2.59436	0.243595	unchanged
XUT0187	4.61005	5.56931e-37	up	2.97502	7.55579e-15	up	2.85741	0.00012567	up	-0.124873	0.935651	unchanged	0.22856	0.607835	unchanged
XUT0188	2.64998	5.56586e-05	up	1.07536	0.190368	unchanged	1.42703	0.388753	unchanged	0.453855	NA	NA	-1.0047	0.125444	unchanged
XUT0189	3.25319	2.57866e-45	up	1.90816	3.77697e-15	up	3.7179	3.36072e-26	up	1.2928	0.00121549	up	2.2672	2.21388e-18	up
XUT0190	2.58053	4.33111e-05	up	1.71597	0.0163862	up	3.18168	1.2148e-06	up	-0.10425	0.941764	unchanged	2.35885	8.67328e-06	up
XUT0191	3.26581	2.331e-09	up	2.26001	0.000158517	up	1.86345	0.0888535	unchanged	-0.211643	0.920624	unchanged	0.373829	0.610199	unchanged
XUT0192	1.64474	0.0117018	up	0.00491457	0.996554	unchanged	1.62308	0.166809	unchanged	-0.453331	NA	NA	-1.03319	0.248825	unchanged
XUT0193	3.62445	0.00143164	up	2.41766	0.070446	unchanged	2.38361	0.161014	unchanged	-3.0326	NA	NA	0.939565	0.361115	unchanged
XUT0195	2.29401	9.74758e-08	up	2.37276	7.6178e-08	up	2.59762	0.000296895	up	-3.17982	0.029695	down	-1.06067	0.0232431	down
XUT0197	3.48335	0.0859774	unchanged	2.59596	1	unchanged	0.946376	0.646729	unchanged	0.00210256	NA	NA	-1.82168	0.646799	unchanged
XUT0198	3.64033	7.08193e-14	up	1.01719	0.099937	unchanged	2.26452	0.0323655	up	-0.300556	0.882224	unchanged	0.796175	0.294958	unchanged
XUT0199	1.15147	0.304078	unchanged	-0.177986	0.917046	unchanged	2.23844	0.16443	unchanged	-3.76525	NA	NA	-0.128672	0.882369	unchanged
XUT0200	3.31076	1.26864e-07	up	1.69589	0.0209951	up	2.25791	0.0231738	up	-0.541711	0.755994	unchanged	-0.761401	0.287115	unchanged
XUT0201	4.91714	1.31624e-28	up	1.47079	0.00704057	up	3.94282	2.45612e-05	up	2.55799	0.0193087	up	5.06929	1.72647e-36	up
XUT0202	4.10957	3.19173e-132	up	2.57262	3.4012e-50	up	2.6304	3.37776e-11	up	-1.01666	0.0713999	unchanged	-0.638786	0.00886051	unchanged
XUT0203	3.54794	1.27245e-27	up	1.69798	2.70152e-06	up	2.73095	1.40005e-06	up	0.11822	0.916015	unchanged	1.89221	6.71977e-07	up
XUT0204	3.9845	6.34998e-20	up	1.71527	0.000652787	up	3.01859	0.000149273	up	0.725748	0.569009	unchanged	0.712992	0.107514	unchanged
XUT0207	2.09705	0.75543	unchanged	0	1	unchanged	NA	NA	NA	NA	NA	NA	NA	NA	NA
XUT0208	2.28775	0.0445136	up	0.55207	0.73909	unchanged	2.33683	0.197286	unchanged	0.431672	NA	NA	0.452976	0.316791	unchanged
XUT0209	2.55495	8.34863e-22	up	1.59688	1.68884e-08	up	2.0926	0.000257754	up	-0.350513	0.72271	unchanged	-0.511312	0.241311	unchanged
XUT0210	1.36909	0.329327	unchanged	-0.810769	1	unchanged	4.79863	0.0683287	unchanged	1.42101	NA	NA	-0.852961	0.485006	unchanged
XUT0211	3.13811	6.23859e-10	up	1.66796	0.00395054	up	2.31902	0.0507806	unchanged	-0.548388	0.801027	unchanged	0.720481	0.37684	unchanged
XUT0212	3.4561	1.99085e-23	up	2.55452	1.74914e-12	up	2.48044	8.77519e-05	up	0.24778	0.82379	unchanged	-0.0197051	0.964318	unchanged
XUT0213	2.30297	9.68493e-06	up	0.267043	0.732934	unchanged	2.27459	0.03448	up	-0.00650378	0.998905	unchanged	1.21708	0.0060414	up
XUT0214	1.79465	0.0522729	unchanged	0.612922	0.626925	unchanged	2.9537	0.177178	unchanged	-0.948655	NA	NA	-0.28825	0.927293	unchanged
XUT0216	2.5473	8.82695e-11	up	0.926546	0.0508855	unchanged	1.44964	0.029699	up	1.1507	0.155942	unchanged	1.78413	1.10916e-11	up
XUT0217	3.46411	0.0356695	up	1.60487	1	unchanged	1.79533	0.536951	unchanged	0.112635	NA	NA	-0.996447	0.580776	unchanged
XUT0218	5.68937	0.00587043	up	4.09653	1	unchanged	-0.231765	0.919882	unchanged	-1.10117	NA	NA	2.5564	0.290339	unchanged
XUT0219	5.3325	0.036394	up	3.86291	1	unchanged	NA	NA	NA	NA	NA	NA	NA	NA	NA
XUT0220	1.45592	0.0675682	unchanged	-6.56155e-05	1	unchanged	1.37435	0.396371	unchanged	-2.56655	NA	NA	-0.624351	0.609346	unchanged
XUT0221	2.24925	0.106117	unchanged	0.84907	1	unchanged	3.94592	0.140706	unchanged	0	NA	NA	0.339539	0.796984	unchanged
XUT0222	3.1391	1.2308e-13	up	-0.172743	0.811942	unchanged	1.1696	0.173469	unchanged	1.41102	0.160493	unchanged	2.20603	4.93785e-13	up
XUT0223	3.09753	9.10704e-19	up	0.918737	0.030846	unchanged	2.70013	6.27495e-05	up	0.277434	0.818455	unchanged	-1.24665	5.49162e-06	down
XUT0224	3.03922	2.82379e-06	up	1.12285	0.17063	unchanged	2.14624	0.0934476	unchanged	-1.48469	NA	NA	0.0951915	0.901522	unchanged
XUT0226	3.23889	3.07599e-15	up	2.52285	5.13087e-09	up	2.71353	0.000118453	up	1.32992	0.144053	unchanged	1.24487	0.00131015	up
XUT0228	2.31769	0.0239839	up	-0.214438	0.900702	unchanged	3.66042	0.0786882	unchanged	2.71622	NA	NA	-1.10543	0.199369	unchanged
XUT0229	0.467725	0.653376	unchanged	-0.0925874	0.951516	unchanged	1.42517	0.369376	unchanged	-2.85918	NA	NA	-4.44201	0.0072123	down
XUT0230	1.45628	0.0134593	up	0.0561753	0.953049	unchanged	1.04148	0.278695	unchanged	0.00967853	0.997966	unchanged	-1.21022	0.0629856	unchanged
XUT0231	3.48733	1.55272e-34	up	1.12977	0.00060063	up	2.51172	0.000208647	up	-0.21727	0.863579	unchanged	-0.845227	0.0675768	unchanged
XUT0232	2.64003	1.56733e-09	up	1.72095	0.000335008	up	2.70014	0.000149273	up	0.373499	0.762124	unchanged	-0.0235261	0.971303	unchanged
XUT0233	0.87464	0.338948	unchanged	-0.534919	0.674229	unchanged	2.18547	0.209095	unchanged	1.60784	NA	NA	1.44173	0.019084	up
XUT0234	4.03848	1.34553e-35	up	2.30754	3.17777e-11	up	2.67877	2.33888e-09	up	0.0141538	0.992922	unchanged	0.588586	0.0185141	unchanged
XUT0235	3.35017	8.69403e-48	up	1.47516	4.62949e-09	up	2.42976	1.07898e-07	up	-0.217532	0.785799	unchanged	-0.875964	3.80011e-05	unchanged
XUT0236	3.29512	3.64733e-06	up	1.61519	0.0571965	unchanged	4.72257	0.0162049	up	0.949568	NA	NA	-1.65748	0.0226521	down
XUT0237	2.34548	1.45503e-09	up	0.605948	0.22402	unchanged	1.45931	0.0538255	unchanged	0.165869	0.901654	unchanged	0.628705	0.163177	unchanged
XUT0238	2.89586	1.19876e-07	up	0.195769	0.825088	unchanged	1.19544	0.24258	unchanged	-0.423338	0.805423	unchanged	0.167055	0.780644	unchanged
XUT0239	2.85535	3.59993e-09	up	2.69043	9.07833e-08	up	2.13576	0.0348339	up	-2.47836	0.168294	unchanged	1.30755	0.00661147	up
XUT0240	4.78283	1.00431e-10	up	2.8885	0.000497788	up	3.31532	0.0126425	up	0.749976	NA	NA	-0.494169	0.601754	unchanged
XUT0241	3.1385	8.08766e-06	up	1.08787	0.230881	unchanged	2.38639	0.052442	unchanged	-1.84945	NA	NA	-1.63356	0.0125	down
XUT0242	3.134	2.25999e-09	up	0.745647	0.284913	unchanged	2.29497	0.00728584	up	-1.58335	0.243069	unchanged	-0.490149	0.30449	unchanged
XUT0243	6.06054	0.000885378	up	4.43165	1	unchanged	2.35298	0.213651	unchanged	0.642887	NA	NA	-1.76111	0.233122	unchanged
XUT0244	2.99418	2.60515e-19	up	1.64116	6.59093e-06	up	2.29147	0.00153889	up	-0.984379	0.398869	unchanged	0.49295	0.0546467	unchanged
XUT0245	1.53424	0.11385	unchanged	2.04291	0.0499882	up	2.86473	0.0280867	up	-1.35004	NA	NA	-1.07896	0.219563	unchanged
XUT0246	3.4888	5.68421e-10	up	2.36689	0.000123446	up	2.39433	0.150696	unchanged	-1.11672	NA	NA	-0.757088	0.134818	unchanged
XUT0247	1.87397	0.00344202	up	0.365551	0.688266	unchanged	1.3797	0.503103	unchanged	-0.593742	NA	NA	-1.91152	1.40392e-05	down
XUT0248	1.84526	6.36417e-05	up	0.374716	0.554915	unchanged	1.16488	0.220039	unchanged	-0.00756776	0.998442	unchanged	0.0290083	0.969004	unchanged
XUT0249	3.345	2.54256e-14	up	1.58104	0.00169458	up	3.35022	1.26106e-05	up	0.636234	0.615129	unchanged	-0.0113392	0.981927	unchanged
XUT0250	3.27855	2.14173e-26	up	1.10191	0.00225313	up	2.47505	0.000238234	up	-0.483566	0.688654	unchanged	-0.404928	0.158389	unchanged
XUT0251	3.59174	3.90022e-28	up	1.93773	5.10645e-08	up	3.16144	2.05155e-09	up	1.58823	0.0103999	up	1.32775	0.000163432	up
XUT0252	4.33886	5.39422e-15	up	2.18908	0.00053115	up	3.07766	0.000877301	up	0.760471	0.611754	unchanged	-0.689858	0.108036	unchanged
XUT0253	3.31377	2.64428e-28	up	1.50705	5.84434e-06	up	2.72024	7.41646e-06	up	-0.318362	0.775217	unchanged	-1.69252	1.13147e-07	down
XUT0254	2.88457	3.62912e-18	up	1.88558	1.06541e-07	up	2.29451	3.25225e-05	up	0.370755	0.692455	unchanged	1.42056	0.000107636	up
XUT0255	4.85871	2.23968e-51	up	2.53617	1.9199e-13	up	2.89958	3.55157e-06	up	-0.520149	0.650262	unchanged	-1.26627	2.18525e-07	down
XUT0256	5.61975	0.00238425	up	-1.61265	1	unchanged	-2.35788	0.53578	unchanged	-2.52484	NA	NA	-1.09715	0.679943	unchanged
XUT0257	4.09052	1.33106e-93	up	2.24164	4.77619e-27	up	1.92906	6.24742e-09	up	1.85981	5.08371e-08	up	-0.384431	0.151559	unchanged
XUT0258	1.62068	0.00166316	up	1.65806	0.00266163	up	2.64374	0.00452892	up	0.447657	0.778788	unchanged	-1.28999	5.2036e-05	down
XUT0259	5.08266	1.6325e-08	up	2.57129	0.0151268	up	1.91759	0.0519034	unchanged	1.26566	0.326292	unchanged	0.542392	0.416038	unchanged
XUT0260	3.1523	5.72253e-09	up	0.63255	0.401875	unchanged	2.64273	0.000986024	up	1.42124	0.166672	unchanged	0.483222	0.319013	unchanged
XUT0261	3.45073	9.32565e-26	up	1.42736	0.000135155	up	2.70148	6.38046e-07	up	0.575761	0.484103	unchanged	0.455092	0.136871	unchanged
XUT0262	3.27365	0.000191249	up	2.09344	0.0401623	up	2.60193	0.11673	unchanged	1.08385	NA	NA	1.66604	0.0196288	up
XUT0263	4.0787	6.88203e-07	up	1.4944	0.154447	unchanged	1.76955	0.1977	unchanged	0.774646	NA	NA	0.322355	0.595841	unchanged
XUT0264	3.99893	1.91482e-50	up	2.30252	4.53899e-16	up	3.82941	1.70126e-12	up	0.543956	0.540263	unchanged	0.347915	0.241311	unchanged
XUT0266	3.9295	5.39857e-14	up	2.12933	0.000291521	up	2.00333	0.023214	up	0.483114	0.739738	unchanged	-0.0995603	0.830013	unchanged
XUT0267	3.07369	5.56135e-05	up	1.48444	0.108763	unchanged	3.10534	0.0323043	up	-1.56587	NA	NA	-1.02243	0.225186	unchanged
XUT0268	3.33637	1.00198e-20	up	1.60535	5.73575e-05	up	2.48725	7.35941e-05	up	0.456888	0.657305	unchanged	-0.994667	0.00195983	unchanged
XUT0269	3.47851	1.24792e-09	up	1.67168	0.0119873	up	3.43298	0.0433659	up	0.501869	NA	NA	-3.40474	0.000763244	down
XUT0270	1.8852	0.0217615	up	1.08744	0.281894	unchanged	1.31789	0.229679	unchanged	-0.464092	0.80194	unchanged	-0.92699	0.167296	unchanged
XUT0271	1.33275	0.0217011	up	0.403163	0.606845	unchanged	1.95024	0.0325442	up	1.05926	0.394921	unchanged	-0.392249	0.408107	unchanged
XUT0272	2.05509	4.95595e-11	up	0.538994	0.170211	unchanged	1.48551	0.00364773	up	-0.290426	0.734201	unchanged	1.89282	1.91161e-09	up
XUT0273	3.82071	6.16212e-07	up	1.81945	0.0474378	up	2.38693	0.133444	unchanged	0.0308855	NA	NA	-1.43945	0.0936663	unchanged
XUT0274	3.66381	3.87543e-10	up	1.85182	0.00617032	up	1.70312	0.126138	unchanged	-1.32397	0.457943	unchanged	-1.15792	0.0452134	down
XUT0275	1.57689	0.000101595	up	2.14392	8.88241e-08	up	2.51042	3.83075e-05	up	1.09483	0.171141	unchanged	1.91738	2.66042e-09	up
XUT0276	4.05108	1.58897e-10	up	2.81952	4.62667e-05	up	7.62662	5.36811e-06	up	4.01465	0.053966	unchanged	1.42191	0.000995516	up
XUT0277	3.62641	0.00504986	up	3.46891	0.0150494	up	5.94838	0.00149156	up	3.96726	NA	NA	0.00366423	0.997154	unchanged
XUT0278	2.34422	0.00634687	up	1.2371	0.246713	unchanged	1.99353	0.174369	unchanged	2.83154	0.0796092	unchanged	3.34172	4.30248e-05	up
XUT0279	2.28047	2.15386e-33	up	0.790041	0.000211439	unchanged	1.84264	6.96297e-08	up	-0.102628	0.865813	unchanged	-2.34662	2.98621e-30	down
XUT0280	3.86699	1.47587e-26	up	2.16813	3.7478e-08	up	3.52489	1.62191e-08	up	-2.49456	0.0443013	down	-0.67528	0.0432601	unchanged
XUT0281	3.18113	6.14033e-51	up	2.2368	1.23242e-24	up	1.99054	1.25351e-05	up	0.713976	0.244008	unchanged	-1.55462	7.70009e-09	down
XUT0282	3.90956	3.30677e-156	up	2.17074	1.92924e-46	up	2.7001	2.45951e-18	up	0.871114	0.0159974	unchanged	-0.510639	0.000672585	unchanged
XUT0283	4.11952	7.42745e-26	up	2.14614	5.93346e-07	up	3.09622	4.12775e-06	up	-0.458628	0.715288	unchanged	-0.21413	0.683545	unchanged
XUT0284	2.97958	0.00491623	up	1.20183	0.388668	unchanged	2.76775	0.190843	unchanged	-2.4259	NA	NA	-0.916642	0.521424	unchanged
XUT0285	2.98138	0.0012905	up	2.75963	0.00652697	up	5.43429	0.0109994	up	1.4936	NA	NA	0.108162	0.928753	unchanged
XUT0287	0.412818	0.772878	unchanged	0.605414	1	unchanged	-0.125934	0.955652	unchanged	-1.28548	NA	NA	1.22366	0.0660512	unchanged
XUT0288	0.203266	0.902158	unchanged	-0.40325	1	unchanged	2.25334	0.30989	unchanged	-0.863389	NA	NA	0.677967	0.42943	unchanged
XUT0289	1.55754	0.00827388	up	0.596572	0.432293	unchanged	1.05851	0.199513	unchanged	-1.05572	0.383796	unchanged	0.919681	0.0301649	unchanged
XUT0290	1.45172	0.0013621	up	0.987936	0.0544612	unchanged	2.20282	0.00340569	up	0.216132	0.87286	unchanged	0.382695	0.38656	unchanged
XUT0291	2.57057	7.42471e-06	up	0.392617	0.63823	unchanged	2.20495	0.0682476	unchanged	-0.547777	NA	NA	-2.25415	3.15212e-07	down
XUT0292	3.46738	5.74339e-14	up	1.8977	0.00023647	up	3.00359	9.76798e-05	up	0.209205	0.886246	unchanged	-0.07105	0.902201	unchanged
XUT0293	2.52089	1.3355e-07	up	0.449387	0.497012	unchanged	2.12405	0.0413961	up	-1.92456	0.261682	unchanged	-1.9888	9.20272e-08	down
XUT0294	2.67208	2.71042e-06	up	1.68692	0.00871621	up	1.99093	0.00859306	up	-0.274253	0.840087	unchanged	-0.46781	0.300662	unchanged
XUT0295	2.89472	0.000155463	up	1.72586	0.0544899	unchanged	3.80882	8.16255e-05	up	0.481969	0.784478	unchanged	-1.30528	0.00739124	down
XUT0296	3.64327	0.00496349	up	1.42553	1	unchanged	4.62693	0.0631644	unchanged	2.58301	NA	NA	0.922739	0.511832	unchanged
XUT0297	3.12177	2.98716e-14	up	0.541428	0.335217	unchanged	1.7734	0.0316138	up	-0.192329	0.899263	unchanged	0.585629	0.259261	unchanged
XUT0298	3.14742	0.478729	unchanged	1.25245	1	unchanged	0	NA	NA	0	NA	NA	NA	NA	NA
XUT0299	5.57823	4.26458e-11	up	2.62931	0.0082124	up	2.05598	0.0358932	up	-0.160566	0.933083	unchanged	-0.860613	0.19978	unchanged
XUT0300	2.87974	1.924e-14	up	1.72813	2.6106e-05	up	2.39356	0.000158847	up	-0.409976	0.711758	unchanged	0.355566	0.388759	unchanged
XUT0301	1.68647	0.00263382	up	-0.133638	0.878612	unchanged	1.42822	0.159546	unchanged	-2.91619	0.0868063	unchanged	0.0430316	0.957513	unchanged
XUT0302	1.81194	0.0476813	up	0.0771811	0.959095	unchanged	1.53076	0.311621	unchanged	-2.5156	NA	NA	-0.655182	0.430297	unchanged
XUT0303	2.70875	0.00833115	up	1.39286	0.280017	unchanged	0.579448	0.742934	unchanged	0.356409	NA	NA	1.40978	0.70551	unchanged
XUT0304	2.95766	4.06655e-71	up	-0.0282123	0.920204	unchanged	0.128532	0.746567	unchanged	0.125994	0.83749	unchanged	3.55457	4.73627e-47	up
XUT0305	3.54152	2.83278e-83	up	1.95731	2.14017e-24	up	2.8384	6.17879e-15	up	0.632999	0.190648	unchanged	0.212445	0.295881	unchanged
XUT0307	4.056	3.89141e-17	up	1.69785	0.00320182	up	2.21943	0.000265944	up	4.99143	9.33589e-19	up	2.27718	1.71916e-09	up
XUT0308	2.426	7.26183e-06	up	0.960796	0.151677	unchanged	1.4014	0.0918379	unchanged	-0.102512	0.949601	unchanged	1.90195	1.65124e-08	up
XUT0309	2.98095	0.000737679	up	1.47087	0.177653	unchanged	5.21272	0.0117296	up	3.08156	NA	NA	1.46542	0.158805	unchanged
XUT0310	1.43938	4.01302e-06	up	1.18581	0.000320544	up	2.73947	3.05357e-08	up	0.310789	0.717978	unchanged	0.659863	0.027407	unchanged
XUT0311	4.5092	8.92842e-208	up	2.79584	3.14425e-77	up	1.76737	7.1852e-09	up	0.733252	0.0440135	unchanged	-0.67812	0.00148474	unchanged
XUT0312	3.94417	7.58681e-21	up	2.5311	2.31036e-08	up	2.25424	0.000616171	up	0.623344	0.531789	unchanged	2.5754	7.63436e-15	up
XUT0313	3.55001	7.95343e-08	up	1.09062	0.208901	unchanged	1.5221	0.157352	unchanged	0.899143	0.56037	unchanged	2.71205	0.000159435	up
XUT0314	2.8218	2.38689e-09	up	0.731985	0.23508	unchanged	2.74845	0.00211193	up	1.3024	0.27747	unchanged	0.354487	0.574175	unchanged
XUT0315	1.56028	0.0115934	up	-0.401054	0.654926	unchanged	1.27134	0.313773	unchanged	-0.253479	NA	NA	-1.93321	0.00273365	down
XUT0316	2.50803	9.3913e-13	up	1.84344	7.59477e-07	up	2.12048	0.00216291	up	0.0683081	0.963136	unchanged	-0.751933	0.0174572	unchanged
XUT0317	4.10436	1.01652e-12	up	1.32418	0.0677308	unchanged	1.60962	0.14504	unchanged	0.0529826	0.986402	unchanged	-0.103429	0.88127	unchanged
XUT0319	3.30766	0.000570998	up	2.15369	0.0545732	unchanged	5.08403	0.0249208	up	2.35437	NA	NA	-0.118127	0.924596	unchanged
XUT0320	1.27103	0.019606	up	-0.101605	0.904499	unchanged	1.19159	0.241749	unchanged	1.39161	0.264397	unchanged	4.04266	0.0228021	up
XUT0321	4.23334	6.74113e-24	up	1.3444	0.00819902	up	2.00614	0.0307739	up	-0.77703	0.626606	unchanged	0.634684	0.227286	unchanged
XUT0322	2.11722	0.000430498	up	0.286014	0.749497	unchanged	1.41525	0.194176	unchanged	-0.0107863	0.998073	unchanged	-1.3562	0.0196288	down
XUT0323	3.27358	0.000637128	up	1.29756	0.30018	unchanged	3.22848	0.0473992	up	-0.102223	NA	NA	-0.218419	0.704233	unchanged
XUT0324	3.51399	3.51708e-20	up	2.4476	1.51265e-09	up	3.35655	3.11572e-07	up	1.5927	0.0474974	up	-0.0102795	0.981312	unchanged
XUT0325	2.35522	8.73363e-06	up	2.75302	3.23044e-07	up	2.68786	0.0003843	up	-1.34161	0.302417	unchanged	0.0454371	0.943992	unchanged
XUT0326	3.89439	2.31723e-60	up	2.55721	3.5674e-25	up	3.23838	1.86515e-11	up	0.595732	0.412358	unchanged	-0.287596	0.230429	unchanged
XUT0327	3.33984	2.30044e-07	up	0.628963	0.497207	unchanged	3.09475	0.0439745	up	1.8121	NA	NA	-1.20302	0.079793	unchanged
XUT0328	3.84991	1.56281e-06	up	1.72438	0.0780881	unchanged	1.60309	0.357355	unchanged	-1.98839	NA	NA	-2.36868	0.000565271	down
XUT0331	3.54279	1.04985e-33	up	1.98378	2.75646e-10	up	2.87469	8.3055e-08	up	0.203697	0.834354	unchanged	1.15571	0.0411428	up
XUT0332	2.8051	0.00155033	up	0.250042	0.858821	unchanged	0.504688	0.765146	unchanged	0.0187505	NA	NA	-0.471648	0.539549	unchanged
XUT0333	4.02265	5.94605e-13	up	3.22534	4.8912e-08	up	5.79166	1.36003e-10	up	0.000573914	1	unchanged	0.036595	0.964631	unchanged
XUT0334	1.70465	0.10446	unchanged	-0.0223316	0.989242	unchanged	0.845984	0.608918	unchanged	-1.32397	NA	NA	-2.10761	0.182372	unchanged
XUT0335	3.94217	2.66587e-12	up	3.31193	2.4251e-08	up	4.25822	0.000420343	up	1.32613	0.465974	unchanged	0.674111	0.230378	unchanged
XUT0336	1.28283	0.0953353	unchanged	-0.578249	0.597727	unchanged	0.532735	0.692198	unchanged	0.326865	NA	NA	2.31063	2.7815e-08	up
XUT0337	2.87727	0.00137108	up	1.40194	0.210633	unchanged	1.80957	0.271047	unchanged	-2.02719	NA	NA	1.26877	0.198556	unchanged
XUT0338	2.77156	0.00096702	up	0.56731	0.638195	unchanged	1.53352	0.241673	unchanged	-1.35092	NA	NA	1.03866	0.141565	unchanged
XUT0339	1.42824	0.0301344	up	0.761352	0.352856	unchanged	1.18375	0.365816	unchanged	-0.9327	NA	NA	-0.948126	0.235607	unchanged
XUT0340	3.32772	4.91375e-07	up	2.7433	0.000119343	up	3.5781	0.00104271	up	1.17779	0.471512	unchanged	-0.421635	0.469831	unchanged
XUT0341	2.83403	0.0272924	up	2.15544	0.154806	unchanged	1.89489	0.300089	unchanged	0.412405	NA	NA	-1.08366	0.345135	unchanged
XUT0343	2.17061	0.000652972	up	1.49289	0.0399333	up	2.33284	0.0508038	unchanged	-4.03257	0.0696008	unchanged	-1.07368	0.130037	unchanged
XUT0344	2.50342	0.00939421	up	1.18662	0.335114	unchanged	1.98949	0.245057	unchanged	-1.95037	NA	NA	-1.60976	0.088978	unchanged
XUT0345	3.29801	8.20854e-12	up	2.19609	2.92577e-05	up	2.70587	0.00061186	up	-0.369097	0.80194	unchanged	-1.14017	0.0149845	down
XUT0346	1.08404	0.000954053	up	0.0848867	0.861446	unchanged	1.31271	0.0180453	up	-0.359488	0.688227	unchanged	-0.607054	0.376066	unchanged
XUT0347	1.49471	0.000674594	up	0.563925	0.307965	unchanged	2.37738	0.00177368	up	1.52858	0.101753	unchanged	3.41231	4.83411e-16	up
XUT0348	1.77038	0.000112753	up	0.0279165	0.969636	unchanged	1.90239	0.00459257	up	-1.21933	0.214451	unchanged	1.99479	5.25802e-11	up
XUT0349	2.32703	1.67225e-08	up	1.18755	0.0119587	up	1.13129	0.0764489	unchanged	-0.178626	0.871707	unchanged	-0.521875	0.158111	unchanged
XUT0350	1.26849	0.0371626	up	0.270192	0.754768	unchanged	1.76705	0.141875	unchanged	-0.640325	NA	NA	0.0355925	0.964476	unchanged
XUT0351	2.63132	0.000121341	up	1.12973	0.185192	unchanged	4.5188	0.0205878	up	1.10431	NA	NA	-1.23653	0.143555	unchanged
XUT0352	2.01405	5.21162e-05	up	2.01929	0.000110291	up	3.42924	0.000266533	up	-0.040822	0.98957	unchanged	-1.22542	0.0376524	down
XUT0353	2.13257	6.26025e-06	up	1.8573	0.000217359	up	2.50984	0.0011444	up	-1.34737	0.285344	unchanged	-1.78025	0.00152095	down
XUT0354	4.31221	0.000108655	up	2.63235	0.0444689	up	5.53486	0.00811757	up	3.46338	NA	NA	-0.384994	0.853959	unchanged
XUT0356	1.58304	3.69066e-05	up	-0.127346	0.830999	unchanged	0.4312	0.573497	unchanged	0.447547	0.688227	unchanged	0.485894	0.195158	unchanged
XUT0357	4.14382	2.06154e-13	up	1.38382	0.048354	up	0.640171	0.471428	unchanged	0.515111	0.694241	unchanged	-0.72153	0.30998	unchanged
XUT0358	3.75002	0.0026008	up	1.68646	0.293642	unchanged	2.47536	0.327661	unchanged	1.99263	NA	NA	NA	NA	NA
XUT0359	4.22449	1.68015e-07	up	1.97376	0.0412054	up	0.991628	0.421191	unchanged	0.442123	0.82121	unchanged	-0.0184658	0.979086	unchanged
XUT0360	1.91592	0.0332093	up	-0.0615002	0.966933	unchanged	1.38119	0.338518	unchanged	-1.59865	NA	NA	0.205517	0.84669	unchanged
XUT0361	3.69451	1.01002e-26	up	1.93887	3.0203e-07	up	3.02956	3.75572e-07	up	-0.73537	0.469482	unchanged	-1.53819	2.98828e-07	down
XUT0362	2.59136	5.78945e-08	up	0.681966	0.279617	unchanged	1.27196	0.0788503	unchanged	0.937573	0.314259	unchanged	1.9126	2.23614e-15	up
XUT0363	2.2119	0.0313214	up	0.326286	0.836446	unchanged	4.10563	0.051095	unchanged	1.03209	NA	NA	0.253933	0.85243	unchanged
XUT0364	2.13497	0.00108079	up	0.813271	0.332118	unchanged	3.14242	0.0169217	up	1.95741	0.250231	unchanged	-0.0518861	0.950032	unchanged
XUT0365	3.61855	2.99376e-36	up	2.11681	4.99867e-12	up	2.64507	7.26415e-08	up	0.397163	0.619583	unchanged	0.0191403	0.95643	unchanged
XUT0366	3.3501	8.12998e-06	up	1.73987	0.0518051	unchanged	4.26064	0.00279953	up	1.04724	0.662745	unchanged	0.872407	0.264212	unchanged
XUT0367	3.01365	0.00383338	up	2.67192	0.0211848	up	2.40526	0.0513849	unchanged	-1.57399	NA	NA	-1.1198	0.370087	unchanged
XUT0368	2.65664	1.32476e-11	up	0.785329	0.108913	unchanged	2.30317	0.00353291	up	-1.66275	0.190344	unchanged	-1.95448	0.0134701	down
XUT0369	3.8643	2.09822e-19	up	1.54115	0.00207041	up	2.68434	0.000632574	up	0.687065	0.577541	unchanged	-0.456086	0.357797	unchanged
XUT0370	3.78336	3.14562e-27	up	1.67695	2.01251e-05	up	2.74597	0.000213304	up	-0.91533	0.462956	unchanged	-0.184595	0.759384	unchanged
XUT0371	3.63982	1.82828e-93	up	1.80005	5.84385e-22	up	2.05157	3.53655e-09	up	0.572329	0.210707	unchanged	-1.1168	1.41937e-07	down
XUT0372	2.77533	1.41396e-12	up	0.495307	0.351734	unchanged	2.14883	0.00198862	up	-2.20685	0.0463134	down	-1.98953	0.00143177	down
XUT0373	3.27228	0.000944921	up	0.951012	0.485237	unchanged	1.31132	0.492166	unchanged	-1.98393	NA	NA	-1.1699	0.292459	unchanged
XUT0374	3.01921	0.00226725	up	0.456825	0.763075	unchanged	3.47709	0.145319	unchanged	0.873879	NA	NA	-1.39225	0.048655	down
XUT0376	4.94413	1.75499e-106	up	3.28404	1.84483e-45	up	3.0213	4.05117e-14	up	1.66412	0.000145348	up	0.986661	3.05477e-07	unchanged
XUT0377	4.85623	1.64822e-44	up	2.2869	1.68267e-09	up	2.26131	0.000108524	up	-0.423956	0.675085	unchanged	-2.30525	1.69203e-08	down
XUT0378	3.7079	4.27658e-14	up	1.8096	0.00123512	up	2.61084	0.00556647	up	0.768123	0.599501	unchanged	1.16656	0.0707432	unchanged
XUT0380	3.03257	8.29988e-21	up	0.768812	0.053111	unchanged	1.89116	0.000673703	up	-0.339307	0.721021	unchanged	1.11979	0.000499609	up
XUT0381	2.33039	0.000463728	up	1.37054	0.079707	unchanged	2.0153	0.0659198	unchanged	-1.66713	0.350996	unchanged	-1.34299	0.0305176	down
XUT0383	3.84344	0.0545156	unchanged	2.41631	1	unchanged	1.79794	0.576413	unchanged	-1.39821	NA	NA	-0.418026	0.845875	unchanged
XUT0384	3.32857	6.67255e-16	up	1.92922	2.02973e-05	up	3.04855	0.00039721	up	-0.577211	0.722929	unchanged	0.266521	0.600955	unchanged
XUT0385	1.7674	0.000455992	up	0.355128	0.612884	unchanged	3.15389	0.00728697	up	2.79058	0.037971	up	-0.0184677	0.976052	unchanged
XUT0386	2.93447	0.00024421	up	1.92287	0.0374801	up	2.09653	0.112274	unchanged	-2.30133	NA	NA	0.880996	0.254421	unchanged
XUT0387	2.04178	4.84069e-07	up	0.340193	0.545785	unchanged	1.75503	0.0344831	up	-1.66443	0.183228	unchanged	-1.08708	0.0483788	down
XUT0388	2.57348	0.000432121	up	2.00186	0.0141553	up	3.06715	0.0109221	up	-1.33161	0.564444	unchanged	-0.164194	0.79419	unchanged
XUT0389	3.81523	4.19329e-05	up	0.953769	0.469341	unchanged	2.56229	0.180526	unchanged	0.700285	NA	NA	0.836946	0.301269	unchanged
XUT0390	4.11522	2.8231e-55	up	2.25855	4.07452e-16	up	2.52967	1.83408e-06	up	-0.289195	0.756941	unchanged	-0.73464	0.0296295	unchanged
XUT0391	1.64623	0.0116313	up	0.868117	0.279617	unchanged	3.35382	0.0426904	up	1.69103	NA	NA	3.36353	3.12175e-09	up
XUT0392	3.12661	2.66059e-06	up	1.93343	0.0107866	up	2.08427	0.112593	unchanged	-1.6167	NA	NA	0.298532	0.563708	unchanged
XUT0393	2.92483	6.75141e-05	up	1.19848	0.195949	unchanged	1.80066	0.0886356	unchanged	-1.76344	0.309718	unchanged	-0.802983	0.5484	unchanged
XUT0394	3.8625	8.97658e-19	up	1.8653	0.00015871	up	4.19874	1.11232e-06	up	1.0311	0.434252	unchanged	-0.632926	0.088978	unchanged
XUT0395	2.36164	1.89275e-27	up	1.13232	1.75618e-06	up	0.950885	0.0264551	unchanged	0.506463	0.375308	unchanged	1.47703	4.21301e-07	up
XUT0396	2.89559	3.21803e-29	up	1.23088	1.73825e-05	up	2.01726	0.000107868	up	-0.719954	0.364591	unchanged	-0.563907	0.0346194	unchanged
XUT0397	2.56637	1.36032e-21	up	1.3225	6.57904e-06	up	1.98243	0.000839326	up	-1.38325	0.111596	unchanged	-0.47596	0.0575964	unchanged
XUT0398	3.34479	0.000477455	up	-0.440319	0.78972	unchanged	1.74075	0.227004	unchanged	-2.62054	NA	NA	-0.233539	0.768949	unchanged
XUT0399	0.907216	0.499937	unchanged	0.682463	1	unchanged	1.58194	0.538062	unchanged	-2.34657	NA	NA	3.02738	0.000735502	up
XUT0400	0.667533	0.642002	unchanged	0.640366	0.718052	unchanged	3.04919	0.0595613	unchanged	1.94656	NA	NA	4.43165	1.1224e-19	up
XUT0401	2.5604	9.97704e-11	up	0.824905	0.0921261	unchanged	1.42398	0.0640841	unchanged	0.543407	0.639025	unchanged	0.950666	0.098664	unchanged
XUT0402	1.53829	0.113491	unchanged	-0.31451	0.833137	unchanged	2.56984	0.211763	unchanged	-0.876617	NA	NA	-1.03831	0.528342	unchanged
XUT0403	3.30473	0.00680226	up	2.40424	0.0925126	unchanged	2.70947	0.164833	unchanged	-0.145688	NA	NA	-0.231845	0.84265	unchanged
XUT0404	4.24158	9.62378e-29	up	0.676654	0.193592	unchanged	1.53883	0.124145	unchanged	-1.13401	0.479844	unchanged	1.44294	3.11436e-05	up
XUT0405	1.43217	0.122633	unchanged	0.0552192	0.969173	unchanged	2.93559	0.113478	unchanged	-0.0396858	NA	NA	-1.14238	0.171483	unchanged
XUT0406	2.88112	0.0521649	unchanged	2.29995	1	unchanged	4.00966	0.0651856	unchanged	1.13281	NA	NA	-0.272402	0.842749	unchanged
XUT0407	3.18026	6.36286e-06	up	1.70776	0.0402349	up	3.16932	0.000858386	up	1.1297	0.412599	unchanged	0.974968	0.0296376	unchanged
XUT0408	3.6457	1.17972e-39	up	1.76689	4.30968e-09	up	1.872	9.84972e-05	up	-0.906867	0.182898	unchanged	-2.16949	5.83474e-14	down
XUT0409	5.74589	9.99141e-06	up	2.01244	0.23731	unchanged	1.18678	0.706645	unchanged	-2.42797	NA	NA	0.490484	0.690221	unchanged
XUT0410	6.34662	7.19626e-05	up	3.52833	0.0648324	unchanged	1.43289	0.505885	unchanged	-1.57763	NA	NA	0.348998	0.662606	unchanged
XUT0411	2.17162	8.17805e-06	up	0.757445	0.216355	unchanged	2.2248	0.00628815	up	0.701178	0.57005	unchanged	-1.2897	9.95686e-05	down
XUT0412	1.54996	0.000474459	up	0.467328	0.415929	unchanged	1.60224	0.104913	unchanged	-0.42242	0.804564	unchanged	-2.48474	2.12173e-10	down
XUT0414	2.57543	2.66112e-07	up	1.60254	0.00434693	up	3.22893	0.000322192	up	0.879609	0.531911	unchanged	1.89861	1.3883e-07	up
XUT0415	2.22008	0.0181161	up	1.35975	0.234605	unchanged	2.81972	0.0436779	up	0.823172	NA	NA	1.56631	0.0301771	up
XUT0416	1.92603	0.00759391	up	1.45931	0.076986	unchanged	3.75686	0.00302779	up	1.72048	0.323099	unchanged	2.14365	0.00100032	up
XUT0417	3.96031	1.62644e-08	up	3.63538	8.79608e-07	up	3.36685	0.000109076	up	0.0292848	0.992566	unchanged	1.93434	7.17426e-05	up
XUT0418	3.55444	5.8683e-15	up	3.0687	8.89398e-11	up	3.02093	0.000362073	up	-0.589532	0.714432	unchanged	-0.506937	0.192696	unchanged
XUT0419	1.95563	0.00961079	up	0.832366	0.389955	unchanged	1.62306	0.222569	unchanged	0.00245698	NA	NA	-1.53466	0.00217079	down
XUT0420	1.78155	3.80467e-07	up	0.410408	0.376662	unchanged	3.00608	2.27697e-08	up	-2.08807	0.017595	down	-2.98576	5.93149e-17	down
XUT0423	2.66814	2.64202e-08	up	0.864586	0.151279	unchanged	2.45864	0.0119651	up	1.38915	0.283389	unchanged	7.35466	4.87903e-94	up
XUT0425	3.67575	2.18496e-08	up	1.95603	0.0102322	up	2.0913	0.0112415	up	0.0726159	0.967853	unchanged	1.16264	0.0251389	up
XUT0427	3.64232	0.000168085	up	2.04121	0.0775604	unchanged	3.96912	0.0720631	unchanged	-1.44856	NA	NA	-1.15279	0.34888	unchanged
XUT0428	3.14167	7.48122e-09	up	1.18745	0.0757971	unchanged	2.32465	0.0153042	up	0.417406	0.798741	unchanged	0.284813	0.594354	unchanged
XUT0429	3.43324	0.00370558	up	1.38777	0.378866	unchanged	2.82923	0.0318405	up	-2.31391	NA	NA	0.666349	0.656222	unchanged
XUT0430	3.17796	4.16082e-82	up	1.71336	2.84345e-23	up	2.23555	1.99054e-14	up	-0.00250573	0.998432	unchanged	0.12716	0.609602	unchanged
XUT0431	3.30078	1.03881e-05	up	0.834626	0.41959	unchanged	3.70966	0.0140605	up	1.60612	NA	NA	0.0838205	0.934739	unchanged
XUT0433	3.72397	3.01393e-35	up	2.06059	1.70379e-10	up	2.19611	0.00142964	up	-1.23964	0.245977	unchanged	-0.615772	0.117389	unchanged
XUT0434	3.33227	1.50415e-13	up	1.41946	0.00725317	up	1.90578	0.0122977	up	0.996744	0.329409	unchanged	2.05351	5.8683e-11	up
XUT0436	1.62031	0.0305136	up	-0.0260539	0.98156	unchanged	1.30196	0.464777	unchanged	-1.22227	NA	NA	0.917137	0.734415	unchanged
XUT0437	2.40567	1.08597e-09	up	0.250124	0.670974	unchanged	1.64644	0.0275491	up	-0.116402	0.934813	unchanged	-0.306919	0.418864	unchanged
XUT0438	1.60923	0.0763079	unchanged	-0.290057	0.83538	unchanged	2.02808	0.214995	unchanged	-3.38958	NA	NA	1.28532	0.0266235	up
XUT0439	3.52414	3.82551e-26	up	2.40129	8.00491e-12	up	2.52403	3.58928e-07	up	0.014854	0.993224	unchanged	-0.0971534	0.789042	unchanged
XUT0440	3.01892	1.69171e-12	up	1.1349	0.0263371	up	1.72039	0.0767967	unchanged	-2.20296	0.157013	unchanged	-2.15864	7.50021e-07	down
XUT0441	2.00198	0.0363062	up	1.20824	0.305858	unchanged	2.53483	0.0184293	up	0.221665	0.916027	unchanged	-0.863849	0.363353	unchanged
XUT0442	2.89548	0.00325473	up	1.83397	0.117263	unchanged	5.21017	0.0202299	up	3.75871	NA	NA	3.64081	1.58421e-13	up
XUT0443	2.16337	0.0166463	up	-0.0655036	0.96494	unchanged	1.91116	0.450594	unchanged	-2.50652	NA	NA	0.214595	0.842749	unchanged
XUT0444	1.53446	0.0193342	up	-0.0462954	0.965329	unchanged	1.67235	0.128384	unchanged	0.281973	0.882127	unchanged	0.306878	0.601754	unchanged
XUT0445	4.71291	0.015032	up	3.83602	1	unchanged	2.62138	NA	NA	0	NA	NA	-1.71548	0.285821	unchanged
XUT0446	3.75454	0.0204166	up	1.39802	1	unchanged	-0.369277	0.920896	unchanged	-2.97884	NA	NA	-2.92178	0.111195	unchanged
XUT0447	4.60634	0.00103787	up	2.83489	0.0905783	unchanged	4.43665	0.385138	unchanged	0	NA	NA	-1.26001	0.108301	unchanged
XUT0448	0.639084	0.849493	unchanged	-3.2277	1	unchanged	0	NA	NA	0	NA	NA	-3.80332	0.0399413	down
XUT0449	2.50716	1.4014e-19	up	1.66052	1.48624e-08	up	2.06878	1.1969e-05	up	0.628269	0.340278	unchanged	0.0241857	0.954509	unchanged
XUT0450	3.46637	3.01576e-15	up	1.73284	0.000496147	up	2.70872	0.00220946	up	0.155277	0.93127	unchanged	-0.242663	0.568198	unchanged
XUT0451	2.05341	0.0113642	up	0.833764	0.429672	unchanged	1.47377	0.265808	unchanged	-0.151067	NA	NA	-1.73507	0.0310005	down
XUT0452	3.63484	5.66414e-14	up	1.43104	0.0126765	up	2.8084	0.00855599	up	-0.571052	0.777413	unchanged	-1.31055	0.00529773	down
XUT0453	4.22746	6.10818e-13	up	2.18993	0.00108029	up	1.8597	0.0833833	unchanged	-0.109585	0.959554	unchanged	1.2919	0.00161219	up
XUT0454	3.41544	1.15269e-05	up	1.87307	0.0413257	up	3.34015	0.00572304	up	0.593433	0.777619	unchanged	1.7561	0.00188281	up
XUT0455	3.93731	1.02499e-41	up	2.06545	4.37014e-11	up	3.05881	3.57921e-09	up	0.469845	0.574863	unchanged	1.11259	0.0010178	up
XUT0456	2.07321	0.000155143	up	-0.400481	0.624478	unchanged	1.54046	0.176618	unchanged	0.22675	0.911544	unchanged	-0.965818	0.0457002	unchanged
XUT0457	1.76027	0.0906124	unchanged	0.820026	0.548772	unchanged	1.19549	0.467613	unchanged	-4.22219	NA	NA	-3.84995	0.0372571	down
XUT0458	4.54594	3.59627e-34	up	2.95925	5.27859e-14	up	2.53884	5.53243e-06	up	0.817121	0.28532	unchanged	0.0346594	0.908292	unchanged
XUT0459	3.9994	0.412049	unchanged	0	1	unchanged	1.62514	NA	NA	0	NA	NA	NA	NA	NA
XUT0460	4.04912	1.91164e-05	up	2.74991	0.0106043	up	0.589413	0.717085	unchanged	-0.380465	NA	NA	0.332497	0.646929	unchanged
XUT0461	4.47343	2.82168e-05	up	3.41368	0.0042423	up	1.77143	0.337298	unchanged	-2.42449	NA	NA	0.683293	0.381117	unchanged
XUT0462	3.40604	1.9508e-19	up	1.28808	0.0034867	up	2.10816	0.00268363	up	0.186214	0.884162	unchanged	-0.885553	0.00559225	unchanged
XUT0463	2.45319	1.15722e-17	up	0.811639	0.0159704	unchanged	3.28034	0.000123366	up	-1.14846	0.460905	unchanged	-0.335761	0.571514	unchanged
XUT0464	0	1	unchanged	0	1	unchanged	NA	NA	NA	NA	NA	NA	0.83358	0.879918	unchanged
XUT0466	0.910126	9.93857e-07	unchanged	0.2856	0.207854	unchanged	1.68514	1.80704e-07	up	0.931086	0.0119517	unchanged	-0.976258	9.0913e-06	unchanged
XUT0467	0.438917	0.00344993	unchanged	0.687784	1.45584e-05	unchanged	2.06334	9.82029e-14	up	0.471568	0.17326	unchanged	-1.36527	8.47571e-18	down
XUT0468	2.66548	1.01682e-23	up	2.2422	1.54427e-16	up	2.37039	1.19776e-08	up	0.938716	0.0683038	unchanged	-0.170871	0.440631	unchanged
XUT0469	3.96956	6.33725e-50	up	2.88914	1.08661e-25	up	3.26765	4.54892e-13	up	0.639087	0.329507	unchanged	0.547941	0.0136089	unchanged
XUT0470	2.91319	6.55532e-05	up	2.24645	0.00547771	up	4.50869	0.0020693	up	-2.45884	0.381074	unchanged	-0.941857	0.29109	unchanged
XUT0471	4.32583	1.14626e-124	up	2.42798	1.13354e-37	up	2.72531	2.03739e-12	up	-0.281385	0.674078	unchanged	-1.16171	1.74653e-10	down
XUT0472	0.799444	0.18863	unchanged	0.475611	0.532049	unchanged	0.555644	0.590818	unchanged	1.49945	0.206605	unchanged	1.97783	1.64002e-06	up
XUT0473	0.810829	0.336747	unchanged	0.0288528	0.980422	unchanged	0.826452	0.483349	unchanged	1.37749	0.341298	unchanged	2.19176	3.75253e-07	up
XUT0474	3.06666	3.30832e-09	up	3.02796	1.50844e-08	up	3.97737	1.77116e-05	up	-0.528414	0.777198	unchanged	0.157024	0.751338	unchanged
XUT0475	2.76719	0.00410027	up	3.18571	0.00189141	up	3.29078	0.259221	unchanged	0.6266	0.899263	unchanged	-0.321311	0.783377	unchanged
XUT0476	4.48681	2.53981e-39	up	2.71803	7.44014e-14	up	3.69507	5.4135e-09	up	2.98621	8.98568e-06	up	2.64694	2.15745e-19	up
XUT0477	1.79708	0.00054111	up	0.263743	0.72796	unchanged	2.06594	0.0282178	up	0.610483	0.68361	unchanged	-0.898311	0.195155	unchanged
XUT0478	2.34947	0.0141501	up	1.41388	0.226436	unchanged	2.1835	0.15933	unchanged	-1.95764	NA	NA	0.0513956	0.938925	unchanged
XUT0479	3.7391	1.28234e-08	up	3.2217	4.06628e-06	up	3.68407	0.00145233	up	1.15425	0.510001	unchanged	-1.22616	0.0284317	down
XUT0480	3.47439	9.97985e-67	up	0.678272	0.00493346	unchanged	1.52897	0.000282859	up	-0.18954	0.792909	unchanged	2.15374	3.26304e-11	up
XUT0481	2.33453	3.29082e-05	up	0.304392	0.715551	unchanged	1.35341	0.266735	unchanged	-0.397252	NA	NA	-1.70165	0.00652058	down
XUT0482	2.41358	0.0428014	up	1.31002	1	unchanged	1.15775	0.582922	unchanged	-0.593909	NA	NA	0.671882	0.718231	unchanged
XUT0484	3.0091	8.69255e-06	up	0.935117	0.290936	unchanged	2.64129	0.0587931	unchanged	0.0696022	NA	NA	-0.946891	0.0725686	unchanged
XUT0486	2.43134	2.29269e-06	up	0.390832	0.597111	unchanged	2.12144	0.0763842	unchanged	0.054566	0.987701	unchanged	-0.0976212	0.926261	unchanged
XUT0487	6.8187	6.64338e-05	up	5.91055	0.00170667	up	3.78992	0.153209	unchanged	-1.40184	NA	NA	0.199601	0.909869	unchanged
XUT0488	3.60917	6.98222e-88	up	2.18229	3.68518e-31	up	2.90504	1.05055e-15	up	0.61101	0.208493	unchanged	-1.27964	3.21617e-08	down
XUT0489	2.5187	8.54683e-06	up	0.563887	0.465421	unchanged	2.78372	0.0028791	up	0.503532	0.751046	unchanged	-1.10038	0.0598443	unchanged
XUT0490	2.90677	1.10919e-07	up	0.245929	0.775998	unchanged	2.22056	0.0198178	up	-0.0419801	0.988262	unchanged	-0.410949	0.341418	unchanged
XUT0491	3.84309	2.30357e-48	up	2.78832	9.3452e-25	up	3.07753	1.39624e-10	up	0.392974	0.618051	unchanged	-0.436404	0.134187	unchanged
XUT0492	2.54	1.43229e-22	up	0.660801	0.0353093	unchanged	1.64345	0.00296034	up	-0.375805	0.682669	unchanged	-1.32706	8.20871e-11	down
XUT0493	-0.274625	0.905763	unchanged	0.190427	1	unchanged	3.9459	0.146576	unchanged	2.32992	NA	NA	-0.626604	0.734072	unchanged
XUT0494	4.16146	2.46969e-47	up	2.61947	4.31534e-18	up	3.71766	3.68213e-10	up	1.00644	0.224971	unchanged	-0.74532	0.0310014	unchanged
XUT0495	3.58642	3.56583e-05	up	1.63707	0.127132	unchanged	4.78362	0.0156338	up	1.71819	NA	NA	-1.49391	0.249208	unchanged
XUT0496	3.86137	0.00372989	up	3.733	0.0109498	up	4.33636	0.0383071	up	0.9964	NA	NA	-0.332285	0.800644	unchanged
XUT0497	3.71713	7.36923e-15	up	1.27811	0.0289011	up	1.79757	0.0226427	up	0.157696	0.913479	unchanged	0.0708084	0.900696	unchanged
XUT0498	2.09638	0.000178819	up	1.50179	0.0165522	up	1.25032	0.175136	unchanged	-0.523321	0.733249	unchanged	-0.466696	0.348885	unchanged
XUT0499	2.89858	1.08366e-22	up	0.992025	0.00452186	unchanged	3.3115	1.01227e-11	up	0.926918	0.154122	unchanged	1.75962	5.39986e-07	up
XUT0500	1.6383	0.49143	unchanged	-1.61023	1	unchanged	3.62694	0.153874	unchanged	0	NA	NA	3.48512	0.0110025	up
XUT0501	2.34087	6.50587e-07	up	0.170402	0.819583	unchanged	3.42106	0.00731611	up	-0.856593	0.680798	unchanged	0.950308	0.032581	unchanged
XUT0502	3.43818	1.35922e-30	up	1.73274	1.132e-07	up	1.88503	7.54914e-05	up	0.491147	0.481242	unchanged	1.9576	4.6464e-26	up
XUT0503	2.25891	0.00958082	up	2.34481	0.0126169	up	6.21109	0.000551914	up	4.49322	0.0338244	up	0.330359	0.764154	unchanged
XUT0504	4.67957	1.951e-15	up	2.60878	7.27138e-05	up	2.27075	0.109565	unchanged	0.364284	NA	NA	-1.00193	0.0702664	unchanged
XUT0505	3.97799	6.864e-11	up	2.54867	0.000158826	up	5.20925	3.63782e-05	up	2.50861	0.120288	unchanged	1.94704	0.000898673	up
XUT0506	4.2937	8.21675e-17	up	2.15216	0.000215593	up	2.22013	0.0370928	up	-0.416039	0.828502	unchanged	-1.79201	2.52052e-07	down
XUT0507	0	1	unchanged	0	1	unchanged	NA	NA	NA	NA	NA	NA	NA	NA	NA
XUT0510	2.36919	0.000539544	up	0.624857	0.50467	unchanged	3.61115	0.0137618	up	2.52761	0.167218	unchanged	0.325124	0.418466	unchanged
XUT0511	2.24163	0.0010232	up	0.676251	0.458785	unchanged	3.70981	0.0237729	up	-1.00562	NA	NA	-1.0634	0.204896	unchanged
XUT0512	3.40367	6.38074e-13	up	2.65215	1.23494e-07	up	2.61608	0.00132168	up	-0.861876	0.536049	unchanged	-1.72309	2.4962e-05	down
XUT0513	2.24082	0.0306071	up	-0.195214	0.911504	unchanged	2.27534	0.0840661	unchanged	-1.03987	NA	NA	-1.25041	0.368962	unchanged
XUT0514	3.48499	0.0227705	up	1.65836	1	unchanged	4.32753	0.0601588	unchanged	-1.45257	NA	NA	-2.39143	0.233858	unchanged
XUT0515	3.13207	9.41967e-09	up	1.21769	0.0690205	unchanged	3.24465	0.000554694	up	1.22636	0.357988	unchanged	0.608747	0.469148	unchanged
XUT0516	1.83812	0.00520481	up	0.45973	0.614332	unchanged	1.0648	0.402821	unchanged	0.202423	NA	NA	-0.367539	0.67628	unchanged
XUT0517	2.28392	1.87333e-06	up	1.4874	0.0053874	up	2.64464	0.00128022	up	1.27517	0.243708	unchanged	0.730868	0.0774295	unchanged
XUT0518	3.22712	4.7272e-05	up	2.58366	0.00314834	up	2.22121	0.0613615	unchanged	0.876552	0.628123	unchanged	0.092005	0.900194	unchanged
XUT0519	2.85608	0.00105995	up	1.82077	0.0749355	unchanged	1.73176	0.280937	unchanged	-1.02163	NA	NA	0.900713	0.453936	unchanged
XUT0520	2.66763	0.00258618	up	1.531	0.152221	unchanged	2.1659	0.162537	unchanged	-0.0337125	NA	NA	-0.643289	0.459773	unchanged
XUT0521	3.12535	1.62994e-40	up	1.20846	3.46443e-06	up	1.78412	0.00062989	up	-0.979557	0.182944	unchanged	-0.876799	7.6237e-05	unchanged
XUT0522	3.54941	3.36879e-05	up	1.86604	0.0692018	unchanged	2.6458	0.102985	unchanged	1.64762	NA	NA	0.257916	0.815713	unchanged
XUT0523	2.32014	0.00857752	up	0.45199	0.728446	unchanged	1.44899	0.3328	unchanged	-2.83096	NA	NA	-1.80294	0.105872	unchanged
XUT0524	2.79722	6.56293e-06	up	1.46287	0.0446835	up	2.01087	0.043115	up	-1.27995	0.420882	unchanged	-0.869005	0.181827	unchanged
XUT0525	2.12923	1.82216e-05	up	0.0843251	0.916836	unchanged	1.88904	0.0325088	up	0.13828	0.934813	unchanged	0.981291	0.00253781	unchanged
XUT0526	3.07624	4.72105e-12	up	1.14422	0.0326045	up	1.4555	0.138534	unchanged	-0.220693	0.901371	unchanged	1.91479	0.00437228	up
XUT0527	3.36694	4.13695e-28	up	2.27438	1.5789e-12	up	2.33381	9.95659e-07	up	0.639358	0.345879	unchanged	0.242515	0.390407	unchanged
XUT0530	4.31364	1.12712e-12	up	2.47364	0.000274316	up	3.64394	0.000963772	up	0.63183	0.745102	unchanged	0.487295	0.39252	unchanged
XUT0531	2.32879	9.46925e-07	up	1.23144	0.0248754	up	1.69687	0.0664577	unchanged	-1.45654	0.311115	unchanged	-0.479772	0.168012	unchanged
XUT0532	3.30847	0.001222	up	2.08483	0.0855024	unchanged	4.56885	0.00998794	up	2.98255	0.18426	unchanged	1.12487	0.0290058	up
XUT0533	1.89216	1.79597e-05	up	1.51334	0.00156119	up	2.88948	0.0001432	up	0.498995	0.697897	unchanged	0.720341	0.19978	unchanged
XUT0534	-0.585372	0.733531	unchanged	1.11494	1	unchanged	3.52251	0.108926	unchanged	0.0703491	NA	NA	1.26769	0.245592	unchanged
XUT0535	2.29102	0.000182055	up	0.946776	0.215141	unchanged	2.96146	0.0112654	up	1.04197	0.560691	unchanged	-0.0348967	0.932314	unchanged
XUT0536	1.9403	2.06177e-05	up	0.790923	0.154806	unchanged	1.15036	0.147991	unchanged	0.0891861	0.952494	unchanged	-1.14631	0.00134748	down
XUT0537	2.73129	0.000158644	up	2.13321	0.00788232	up	2.65663	0.037138	up	-2.33873	NA	NA	3.53185	4.67769e-14	up
XUT0538	1.74293	0.0513335	unchanged	1.03502	0.352945	unchanged	2.51766	0.0975582	unchanged	-3.79528	NA	NA	-0.287923	0.763071	unchanged
XUT0539	2.3894	3.20847e-06	up	1.37361	0.0195493	up	3.25081	0.000183318	up	-0.376026	0.825279	unchanged	-0.738471	0.0897193	unchanged
XUT0540	2.2892	0.000210258	up	0.0279727	0.976581	unchanged	1.61417	0.168389	unchanged	0.171751	0.937012	unchanged	0.609786	0.172918	unchanged
XUT0541	3.79825	1.12894e-91	up	1.53802	2.15074e-14	up	2.14912	2.72114e-08	up	-0.0271046	0.977458	unchanged	0.700778	0.00167759	unchanged
XUT0542	1.99878	0.00642645	up	1.89508	0.0183718	up	1.61682	0.175294	unchanged	1.64832	0.263986	unchanged	0.720122	0.285952	unchanged
XUT0543	3.17492	3.89147e-08	up	1.5817	0.0192353	up	3.19698	0.00719313	up	-1.35481	0.5538	unchanged	-1.2321	0.0107031	down
XUT0544	1.42012	0.0825422	unchanged	-0.00494438	0.9972	unchanged	1.32459	0.324841	unchanged	0.0836812	NA	NA	1.12865	0.0658849	unchanged
XUT0549	2.46598	6.4608e-05	up	1.4459	0.0434776	up	2.43037	0.0233334	up	-1.60495	0.377189	unchanged	-0.572603	0.294448	unchanged
XUT0550	3.19775	6.31237e-07	up	2.01526	0.0055394	up	2.12953	0.023098	up	0.692733	0.628972	unchanged	0.0532634	0.939189	unchanged
XUT0551	3.47988	9.64331e-05	up	1.66003	0.130865	unchanged	3.08024	0.00174511	up	-1.82299	0.336981	unchanged	-1.14989	0.172018	unchanged
XUT0552	2.05344	0.000108363	up	1.26433	0.0377824	up	2.45467	0.00309606	up	-1.69519	0.223207	unchanged	-0.435585	0.501847	unchanged
XUT0553	2.44138	2.18601e-05	up	1.60171	0.0136747	up	2.78477	0.0336825	up	1.27148	0.507614	unchanged	-1.00059	0.310759	unchanged
XUT0554	3.7152	0.00541966	up	2.82358	0.0684966	unchanged	4.10711	0.0403041	up	0.0562104	NA	NA	1.12543	0.288146	unchanged
XUT0555	1.84246	0.250313	unchanged	-0.799694	1	unchanged	3.66523	0.146889	unchanged	-1.40328	NA	NA	-2.12274	0.0452874	down
XUT0556	3.23601	0.000103502	up	1.76792	0.0757889	unchanged	2.61672	0.0691165	unchanged	0.449215	NA	NA	0.647954	0.383027	unchanged
XUT0557	3.9426	1.57905e-16	up	1.93499	0.000341198	up	2.03949	0.0126222	up	-0.954608	0.476367	unchanged	-0.74256	0.303821	unchanged
XUT0558	3.76576	1.39355e-18	up	1.97376	3.24831e-05	up	2.93619	0.000234145	up	-0.665453	0.647399	unchanged	-1.86698	7.19359e-06	down
XUT0559	3.68764	5.40692e-07	up	2.05329	0.0160675	up	2.6418	0.0725605	unchanged	-0.431303	NA	NA	-2.06096	0.00125806	down
XUT0560	3.77965	1.06053e-08	up	2.41793	0.00102691	up	3.12091	0.0259422	up	-3.48935	NA	NA	-1.67731	0.0426763	down
XUT0561	4.97427	3.82866e-10	up	1.03875	0.35512	unchanged	4.21367	0.177082	unchanged	0	NA	NA	-1.0058	0.177019	unchanged
XUT0562	4.70877	0.0198237	up	2.12615	1	unchanged	1.63116	NA	NA	0	NA	NA	-1.64538	0.641021	unchanged
XUT0563	4.28245	0.00485866	up	1.65117	1	unchanged	3.2171	0.395322	unchanged	0	NA	NA	-1.58895	0.29074	unchanged
XUT0564	6.39922	8.03246e-05	up	3.92271	0.0391147	up	2.58541	0.283126	unchanged	-2.34932	NA	NA	-0.250882	0.881667	unchanged
XUT0565	2.3415	1.38667e-05	up	-0.186996	0.831969	unchanged	1.02811	0.167648	unchanged	1.00019	0.281076	unchanged	0.2695	0.726435	unchanged
XUT0566	5.1778	5.32145e-209	up	1.9938	5.27156e-29	up	2.97392	7.2045e-18	up	0.939781	0.0221073	unchanged	0.0819271	0.719593	unchanged
XUT0567	5.6088	1.18875e-126	up	3.08786	1.59221e-36	up	2.21591	1.96998e-06	up	0.125361	0.884162	unchanged	-0.43703	0.18476	unchanged
XUT0568	3.9861	6.51886e-24	up	1.05218	0.0330546	up	1.69654	0.053674	unchanged	-1.17478	0.385523	unchanged	-0.173543	0.627231	unchanged
XUT0569	3.99785	7.61092e-14	up	0.825605	0.260357	unchanged	3.13691	0.0113185	up	2.2773	0.135011	unchanged	0.291866	0.568997	unchanged
XUT0570	3.83423	4.87718e-08	up	1.07485	0.256244	unchanged	2.28749	0.0840854	unchanged	1.60702	0.361558	unchanged	2.40788	1.24618e-06	up
XUT0571	2.86273	2.14131e-08	up	1.86866	0.000966839	up	2.49988	0.0132383	up	1.69241	0.183066	unchanged	0.864901	0.212865	unchanged
XUT0572	3.41674	1.3833e-43	up	1.84424	2.57422e-12	up	1.77021	0.000147081	up	1.31095	0.0130393	up	0.612177	0.0344194	unchanged
XUT0573	0.884394	0.454248	unchanged	-0.943255	1	unchanged	1.76772	0.383228	unchanged	1.02219	NA	NA	-1.00274	0.122026	unchanged
XUT0574	3.60531	3.8024e-21	up	1.57275	0.000313534	up	2.57554	0.00010889	up	-0.753641	0.495042	unchanged	-0.724586	0.028561	unchanged
XUT0575	5.56319	5.20825e-181	up	2.1998	2.60964e-26	up	2.63717	4.25105e-09	up	-0.557591	0.429664	unchanged	-0.678422	0.00228232	unchanged
XUT0576	2.58529	9.38373e-20	up	0.318127	0.413781	unchanged	1.25262	0.0273434	up	-1.43092	0.0542642	unchanged	-0.394441	0.284726	unchanged
XUT0577	3.23844	0.000666172	up	1.39445	0.250047	unchanged	2.81311	0.192663	unchanged	-2.49565	NA	NA	-2.07986	0.222001	unchanged
XUT0578	3.21643	1.94733e-11	up	0.568373	0.389955	unchanged	1.2313	0.316115	unchanged	-0.721045	NA	NA	-1.838	0.00424233	down
XUT0579	3.81167	1.61774e-24	up	1.26338	0.0042423	up	2.96683	0.000672135	up	-0.171605	0.92273	unchanged	-1.5939	0.045876	down
XUT0580	4.61592	1.22089e-181	up	1.51221	3.53152e-18	up	2.58044	4.79102e-11	up	0.352881	0.557779	unchanged	-0.366641	0.19983	unchanged
XUT0581	4.16876	0.00183513	up	2.54182	0.115123	unchanged	1.99036	0.356202	unchanged	-2.42587	NA	NA	-1.29787	0.20537	unchanged
XUT0582	5.07146	7.80442e-07	up	2.22816	0.0784709	unchanged	1.88485	0.244508	unchanged	-2.01077	NA	NA	-0.899486	0.302011	unchanged
XUT0583	3.43133	6.71851e-09	up	0.386944	0.671479	unchanged	1.88506	0.184201	unchanged	0.318102	NA	NA	-1.09138	0.215193	unchanged
XUT0584	3.82178	1.75749e-16	up	2.64539	1.00135e-07	up	4.24721	0.00186257	up	2.17767	0.226775	unchanged	-0.952777	0.100461	unchanged
XUT0585	4.34814	6.79044e-11	up	2.30329	0.0025595	up	3.89637	0.0348295	up	3.45446	0.116737	unchanged	-0.177359	0.849298	unchanged
XUT0586	3.62612	2.49581e-13	up	0.892965	0.161464	unchanged	1.43058	0.0660668	unchanged	-1.51197	0.18207	unchanged	-0.120477	0.906002	unchanged
XUT0587	3.14077	0.00160541	up	0.951053	0.486054	unchanged	1.20667	0.546489	unchanged	-1.57604	NA	NA	-0.311751	0.826225	unchanged
XUT0588	2.50613	0.0356892	up	-0.183637	1	unchanged	1.57352	0.484729	unchanged	1.09209	NA	NA	3.01373	9.90056e-08	up
XUT0589	6.14856	3.49705e-30	up	1.56197	0.0233455	up	1.77926	0.0168406	up	1.894	0.0207567	up	5.00585	2.65415e-28	up
XUT0590	4.01411	1.60551e-05	up	1.29066	0.299145	unchanged	1.84396	0.267216	unchanged	-1.93727	NA	NA	0.418552	0.591019	unchanged
XUT0591	2.21712	0.000124377	up	-0.179319	0.846031	unchanged	1.07737	0.300089	unchanged	-3.09554	0.0678542	unchanged	-1.34231	0.0982826	unchanged
XUT0592	2.67344	0.000424354	up	0.231025	0.848411	unchanged	3.43414	0.0569237	unchanged	0.107797	NA	NA	-0.0252918	0.981927	unchanged
XUT0593	3.51969	6.5075e-06	up	0.623324	0.589642	unchanged	1.73553	0.251537	unchanged	0.283824	NA	NA	0.371527	0.629193	unchanged
XUT0594	4.16573	2.29473e-09	up	1.5129	0.0834281	unchanged	2.57622	0.0670503	unchanged	-0.489299	NA	NA	-1.19286	0.161894	unchanged
XUT0595	4.40016	6.36271e-22	up	1.7517	0.00092638	up	4.33178	7.83266e-06	up	1.23976	0.383727	unchanged	-1.31076	0.00200065	down
XUT0596	4.82263	2.3317e-29	up	0.42241	0.516219	unchanged	2.37534	0.0478167	up	0.871616	0.637702	unchanged	-2.28042	0.000131884	down
XUT0597	4.40907	1.5518e-66	up	2.35384	3.97622e-18	up	2.76143	1.51511e-07	up	-0.237142	0.803755	unchanged	1.24608	2.39197e-05	up
XUT0598	3.72917	2.17548e-45	up	1.68063	5.69182e-09	up	3.73286	3.51051e-07	up	-0.663046	0.630544	unchanged	-1.92334	7.60359e-09	down
XUT0599	5.6997	2.39065e-218	up	2.56145	7.65932e-42	up	2.92361	2.83633e-16	up	-0.087344	0.897967	unchanged	0.0206724	0.932936	unchanged
XUT0600	2.52285	0.00669662	up	-0.533141	0.718394	unchanged	0.566809	0.75265	unchanged	-1.60022	NA	NA	-1.30855	0.340904	unchanged
XUT0601	5.21451	0.00449757	up	1.39259	1	unchanged	1.18147	0.714739	unchanged	-2.42808	NA	NA	-1.29798	0.243989	unchanged
XUT0602	4.36921	2.89629e-106	up	1.59182	2.71797e-13	up	2.2437	7.06804e-08	up	0.0690337	0.932693	unchanged	-0.767017	0.00150069	unchanged
XUT0603	2.49606	2.31169e-05	up	0.0970994	0.92072	unchanged	2.08425	0.0150723	up	1.00686	0.395814	unchanged	-1.37362	0.00043296	down
XUT0604	2.40344	0.00278608	up	0.356108	0.770237	unchanged	0.572442	0.641933	unchanged	0.246031	NA	NA	-0.992755	0.17118	unchanged
XUT0605	2.804	1.23247e-09	up	-0.499776	0.471481	unchanged	1.7791	0.0748584	unchanged	-0.793432	0.629143	unchanged	0.209344	0.82389	unchanged
XUT0606	2.81735	0.00283894	up	0.673076	0.626506	unchanged	-0.565587	0.723925	unchanged	0.980564	NA	NA	-0.114988	0.946703	unchanged
XUT0607	3.7841	3.03539e-07	up	1.57709	0.0832836	unchanged	2.82808	0.0354367	up	-3.42515	NA	NA	-1.32151	0.276905	unchanged
XUT0608	3.48226	4.3616e-06	up	0.98695	0.33455	unchanged	3.96928	0.0714915	unchanged	0.994208	NA	NA	-0.866296	0.391122	unchanged
XUT0609	2.87375	0.000131578	up	0.816499	0.423363	unchanged	3.04139	0.0248513	up	-0.428726	NA	NA	-1.24656	0.173132	unchanged
XUT0610	4.7755	2.7478e-21	up	2.37186	2.60629e-05	up	1.62218	0.0670308	unchanged	-1.73187	0.200551	unchanged	-1.47027	0.00611694	down
XUT0611	5.20134	1.11901e-81	up	2.87178	6.40413e-24	up	2.46778	1.07324e-06	up	-0.595324	0.45694	unchanged	-0.940474	2.5623e-05	unchanged
XUT0612	3.94643	8.19158e-25	up	1.78174	3.69911e-05	up	2.52405	0.000385495	up	-0.221547	0.868096	unchanged	-0.605094	0.118535	unchanged
XUT0613	3.36975	3.25005e-29	up	2.05438	1.24472e-10	up	2.11818	7.01536e-05	up	0.154233	0.872627	unchanged	-0.747403	0.00360911	unchanged
XUT0614	2.9361	0.0148222	up	2.48368	1	unchanged	4.21186	0.19835	unchanged	0	NA	NA	-0.137726	0.91758	unchanged
XUT0616	3.47439	2.17423e-10	up	2.40308	5.62164e-05	up	2.28787	0.0107387	up	-0.839845	0.577377	unchanged	0.457137	0.376128	unchanged
XUT0617	2.04842	0.225196	unchanged	-0.803631	1	unchanged	3.53008	0.174965	unchanged	-1.40249	NA	NA	-0.95782	0.706247	unchanged
XUT0618	4.01127	1.83466e-25	up	2.97119	1.47483e-13	up	3.62784	6.33435e-08	up	-0.699821	0.57338	unchanged	-0.23185	0.638483	unchanged
XUT0619	3.01215	5.17959e-13	up	2.11549	2.30942e-06	up	2.4338	0.000129312	up	0.0106169	0.997167	unchanged	-0.708002	0.026898	unchanged
XUT0620	0.84599	0.412468	unchanged	0.0811826	0.958762	unchanged	0.138031	0.947123	unchanged	-2.87049	NA	NA	-1.48244	0.0769441	unchanged
XUT0621	2.90143	8.43205e-06	up	-0.0610259	0.958689	unchanged	1.50466	0.148972	unchanged	0.938147	0.521456	unchanged	0.794877	0.181214	unchanged
XUT0622	4.44613	3.37584e-19	up	1.91682	0.000858005	up	2.16057	0.0291436	up	1.43298	0.260374	unchanged	0.537676	0.424873	unchanged
XUT0623	3.16669	2.53375e-05	up	0.661585	0.540868	unchanged	1.93659	0.171255	unchanged	1.45166	NA	NA	2.09209	0.000415639	up
XUT0624	2.97122	0.000873254	up	0.135601	0.929075	unchanged	2.59898	0.131685	unchanged	0.972402	NA	NA	0.229467	0.747374	unchanged
XUT0625	2.99021	0.103704	unchanged	1.37181	1	unchanged	1.62525	NA	NA	1.40524	NA	NA	-1.08997	0.842749	unchanged
XUT0626	2.21174	3.92434e-05	up	1.69868	0.00407879	up	2.17096	0.0199349	up	0.00497856	0.999156	unchanged	-0.00968355	0.981927	unchanged
XUT0627	2.47518	0.00636959	up	0.726548	0.565646	unchanged	1.76966	0.192017	unchanged	0.566237	NA	NA	-0.244417	0.745505	unchanged
XUT0628	2.64081	1.02783e-07	up	0.734022	0.256834	unchanged	1.66906	0.0867554	unchanged	0.220381	0.899263	unchanged	-1.16377	0.0138126	down
XUT0629	3.16484	5.49204e-08	up	1.34115	0.0577009	unchanged	1.34623	0.160529	unchanged	0.925325	0.480595	unchanged	1.38135	0.010806	up
XUT0630	2.62557	1.04389e-15	up	0.198726	0.688369	unchanged	1.00854	0.112548	unchanged	-1.08739	0.209614	unchanged	-2.46582	1.5521e-14	down
XUT0631	2.03442	0.0723748	unchanged	-0.374409	1	unchanged	1.99216	0.329155	unchanged	0.0175886	NA	NA	-1.44376	0.331692	unchanged
XUT0632	3.39936	2.46457e-16	up	0.89155	0.0900993	unchanged	1.44319	0.123431	unchanged	0.851335	0.517365	unchanged	0.699448	0.0606813	unchanged
XUT0633	2.14158	9.548e-12	up	1.0343	0.00361136	up	0.384958	0.564714	unchanged	-0.591683	0.535375	unchanged	-1.76367	6.20612e-11	down
XUT0634	3.33888	1.16431e-17	up	1.63919	0.000186584	up	1.84742	0.0127217	up	0.619735	0.577467	unchanged	0.281197	0.524309	unchanged
XUT0635	0.966373	0.167504	unchanged	-0.462122	0.633408	unchanged	2.45904	0.044395	up	2.3927	0.0928749	unchanged	4.52986	0.00517476	up
XUT0636	3.43105	0.011918	up	0.238117	1	unchanged	2.72272	0.349272	unchanged	-1.47005	NA	NA	-2.07723	0.162105	unchanged
XUT0638	2.00769	0.000513546	up	0.501607	0.523525	unchanged	2.32894	0.0349848	up	-1.19816	0.515373	unchanged	-1.75817	0.0104973	down
XUT0639	2.04798	0.00665364	up	0.142002	0.906336	unchanged	2.18643	0.135205	unchanged	-4.06593	NA	NA	-1.52948	0.009698	down
XUT0640	2.50617	0.00798784	up	1.17883	0.326431	unchanged	2.75197	0.0504191	unchanged	-3.7627	NA	NA	-1.32546	0.0429899	down
XUT0643	3.08151	5.26985e-16	up	1.50978	0.000424276	up	1.98814	0.00413135	up	-0.91185	0.399149	unchanged	-2.01632	8.63265e-08	down
XUT0644	3.07346	3.83209e-16	up	2.13629	1.08435e-07	up	2.93928	0.000125813	up	-0.15349	0.924001	unchanged	-2.02647	1.55339e-07	down
XUT0645	4.01992	1.04333e-11	up	2.05155	0.00244971	up	3.88804	7.48788e-07	up	2.91059	0.000754818	up	-0.0358625	0.949347	unchanged
XUT0646	3.07414	0.00134125	up	1.39105	0.25228	unchanged	3.16662	0.142579	unchanged	2.35217	NA	NA	0.770359	0.431375	unchanged
XUT0647	2.13218	0.0103814	up	0.749086	0.499544	unchanged	2.18272	0.134817	unchanged	-0.430506	NA	NA	-1.44107	0.0293036	down
XUT0648	3.58498	4.08625e-09	up	2.16972	0.00157594	up	0.601189	0.589826	unchanged	1.70751	0.160288	unchanged	-0.445112	0.613141	unchanged
XUT0649	2.10525	7.94088e-07	up	-1.38354	0.0108184	down	-0.200785	0.811909	unchanged	-1.7071	0.103524	unchanged	-2.06399	8.25674e-21	down
XUT0650	NA	NA	NA	NA	NA	NA	NA	NA	NA	NA	NA	NA	-0.128202	0.981927	unchanged
XUT0651	2.3638	2.71826e-09	up	-0.000301656	0.999706	unchanged	2.8904	0.00022526	up	0.397705	0.770647	unchanged	0.223195	0.744737	unchanged
XUT0652	0	1	unchanged	0	1	unchanged	0	NA	NA	1.40317	NA	NA	NA	NA	NA
XUT0653	4.46815	7.06882e-153	up	2.29503	3.89805e-38	up	2.7214	5.69741e-15	up	1.37729	0.000320317	up	0.524165	0.00888931	unchanged
XUT0654	4.61174	3.09061e-66	up	1.45454	2.146e-06	up	0.755713	0.0767266	unchanged	1.01001	0.031492	up	3.55784	6.92587e-53	up
XUT0655	3.16733	2.101e-21	up	3.15354	8.36652e-21	up	1.99505	0.000962895	up	-0.0635029	0.959554	unchanged	-0.21874	0.60495	unchanged
XUT0656	2.38691	6.58054e-10	up	0.978285	0.0320873	unchanged	2.39	0.00230746	up	-0.748019	0.573528	unchanged	-1.45393	0.200535	unchanged
XUT0660	1.13556	0.0457899	up	0.921321	0.155852	unchanged	2.51286	0.0055194	up	1.48987	0.198801	unchanged	0.529333	0.421177	unchanged
XUT0661	2.53848	1.97893e-05	up	0.74752	0.341852	unchanged	2.22214	0.0593203	unchanged	0.763677	0.678816	unchanged	-2.59261	0.0190423	down
XUT0663	2.93879	3.1731e-18	up	0.177529	0.737342	unchanged	2.55865	0.000122933	up	1.33153	0.108512	unchanged	1.77323	2.0346e-08	up
XUT0664	1.75499	0.0528766	unchanged	-0.021357	0.98804	unchanged	1.38518	0.403328	unchanged	0.95712	NA	NA	-0.220117	0.823645	unchanged
XUT0665	3.59968	1.22978e-10	up	2.08757	0.000904651	up	2.56017	0.0128163	up	-0.0230667	0.995832	unchanged	0.656807	0.107792	unchanged
XUT0667	2.54016	4.85451e-05	up	0.992297	0.205695	unchanged	2.31697	0.0358337	up	-2.02608	0.29951	unchanged	-0.380672	0.639591	unchanged
XUT0668	3.04481	1.50693e-08	up	0.983134	0.150579	unchanged	2.58543	0.000878662	up	-0.671396	0.62441	unchanged	2.06008	8.08715e-06	up
XUT0669	1.54674	0.0641471	unchanged	-0.33146	0.79147	unchanged	1.91846	0.192958	unchanged	-0.881311	NA	NA	-1.48804	0.257729	unchanged
XUT0670	2.65706	0.000902062	up	1.4325	0.139006	unchanged	2.82782	0.0421445	up	0.121824	NA	NA	-0.593399	0.495524	unchanged
XUT0671	3.68807	1.8361e-58	up	2.09138	4.06e-18	up	2.16496	1.07194e-05	up	0.201854	0.814869	unchanged	0.693142	0.0760206	unchanged
XUT0672	5.0204	0.00301132	up	3.39844	0.0905231	unchanged	2.99209	0.104076	unchanged	-1.01068	NA	NA	-0.667436	0.656602	unchanged
XUT0673	3.96324	5.70264e-43	up	2.08895	1.72852e-11	up	2.61786	3.4775e-07	up	0.238307	0.795206	unchanged	1.27654	2.68566e-05	up
XUT0674	3.69688	3.87611e-10	up	0.709241	0.39543	unchanged	2.59629	0.0330993	up	-0.033325	0.994489	unchanged	-0.746419	0.266417	unchanged
XUT0676	4.20389	3.24369e-08	up	2.33173	0.00783573	up	2.08092	0.0963485	unchanged	-0.201617	0.934461	unchanged	-0.269652	0.909869	unchanged
XUT0677	5.28527	1.83303e-05	up	2.97233	0.0419582	up	1.30128	0.45952	unchanged	-0.857563	NA	NA	-1.35551	0.158014	unchanged
XUT0678	3.99006	3.10753e-25	up	1.28247	0.00558624	up	2.01958	0.0270027	up	1.3011	0.269466	unchanged	0.232817	0.635563	unchanged
XUT0679	1.80493	0.00200322	up	1.15216	0.0889071	unchanged	2.93644	0.00042771	up	-1.46583	0.314259	unchanged	-3.19046	7.59108e-10	down
XUT0680	3.35279	2.30656e-24	up	1.338	0.000406155	up	0.728153	0.236205	unchanged	0.536141	0.527769	unchanged	1.78167	9.92399e-07	up
XUT0681	2.29163	0.000459425	up	1.70449	0.0202706	up	3.36488	0.0021093	up	0.0435523	0.990366	unchanged	-2.17878	0.00341509	down
XUT0682	2.74235	0.0173709	up	2.06459	0.127195	unchanged	5.00656	0.0123308	up	0.00592863	NA	NA	-1.74464	0.0432811	down
XUT0683	4.06874	1.02058e-136	up	1.47195	2.97297e-17	up	2.00511	2.43593e-09	up	-0.847462	0.045249	unchanged	-1.32647	2.94014e-06	down
XUT0684	3.15492	7.6114e-05	up	0.560937	0.63336	unchanged	1.29821	0.348195	unchanged	-0.621224	NA	NA	-0.848971	0.430312	unchanged
XUT0685	3.39525	0.00184682	up	2.34817	0.0648546	unchanged	3.0112	0.260245	unchanged	0.911322	NA	NA	-1.05162	0.318485	unchanged
XUT0686	4.15038	4.56808e-33	up	2.62037	9.39329e-13	up	2.99636	1.19337e-08	up	-0.23496	0.811209	unchanged	-0.225923	0.490353	unchanged
XUT0687	4.35832	5.21281e-49	up	2.46661	4.86887e-15	up	2.43471	1.11505e-06	up	0.838255	0.208278	unchanged	0.161127	0.65189	unchanged
XUT0688	3.31128	1.84315e-23	up	1.67012	5.02221e-06	up	2.21938	0.000352606	up	-0.146256	0.904299	unchanged	0.0863178	0.833378	unchanged
XUT0689	4.61339	4.93993e-17	up	2.32892	0.000179639	up	3.69447	0.00123333	up	1.34678	0.41487	unchanged	-0.622913	0.440775	unchanged
XUT0690	3.33031	1.70428e-06	up	1.45796	0.0878403	unchanged	2.2911	0.0698842	unchanged	2.28983	0.123836	unchanged	1.85485	0.00352236	up
XUT0691	0.84649	0.403782	unchanged	-0.738123	0.593261	unchanged	2.66408	0.029775	up	-2.61213	NA	NA	-0.512296	0.382662	unchanged
XUT0692	3.966	3.38035e-73	up	2.19402	1.65794e-21	up	2.89418	5.79111e-13	up	1.2008	0.0106343	up	-0.680452	0.0125105	unchanged
XUT0696	1.12975	0.220031	unchanged	-0.164636	0.906769	unchanged	1.78203	0.111538	unchanged	-4.99806	0.0161182	down	-1.11981	0.239867	unchanged
XUT0697	2.68979	0.00097181	up	-0.17112	0.900945	unchanged	2.72891	0.314354	unchanged	0.0439535	NA	NA	-0.664782	0.530729	unchanged
XUT0698	3.05437	8.83237e-07	up	1.21664	0.110788	unchanged	1.97289	0.0772941	unchanged	0.00120803	1	unchanged	-0.133299	0.819039	unchanged
XUT0699	2.71853	0.000767876	up	1.34971	0.174389	unchanged	3.00391	0.00737025	up	-0.548699	0.794929	unchanged	0.312168	0.688814	unchanged
XUT0700	1.82368	0.112685	unchanged	1.07934	0.459818	unchanged	4.10753	0.0499634	up	1.58237	NA	NA	-0.353806	0.718775	unchanged
XUT0701	3.36037	2.22654e-13	up	1.17419	0.0343034	up	1.87462	0.0173166	up	-0.671318	0.607482	unchanged	-0.377003	0.453267	unchanged
XUT0702	3.79688	1.54532e-10	up	1.11598	0.149802	unchanged	1.03146	0.266815	unchanged	0.779027	0.547632	unchanged	1.399	0.0124202	up
XUT0703	2.48897	3.37697e-23	up	0.478734	0.131258	unchanged	1.27608	0.0139493	up	-0.385157	0.63791	unchanged	0.763449	0.0019646	unchanged
XUT0704	3.61774	2.9144e-34	up	1.66389	3.57124e-07	up	2.90913	8.15145e-08	up	1.76265	0.00421623	up	0.382829	0.326434	unchanged
XUT0705	3.32567	3.00684e-09	up	1.50358	0.0233398	up	2.22731	0.0347477	up	-0.246564	0.904299	unchanged	-0.470059	0.333676	unchanged
XUT0706	3.65799	0.0955299	unchanged	1.82248	1	unchanged	1.63054	NA	NA	1.40696	NA	NA	-2.65233	0.333161	unchanged
XUT0707	1.31834	0.10121	unchanged	0.578503	0.584803	unchanged	1.64226	0.264724	unchanged	1.0225	NA	NA	-0.0844708	0.862531	unchanged
XUT0708	1.78307	0.0615402	unchanged	0.829679	0.504193	unchanged	1.54345	0.207222	unchanged	-1.3904	NA	NA	0.298109	0.769236	unchanged
XUT0709	3.42383	1.41909e-05	up	2.47311	0.00509249	up	4.35825	0.000123104	up	1.64385	0.303922	unchanged	1.40945	0.00431877	up
XUT0710	4.04095	5.55688e-75	up	2.03461	2.99987e-18	up	3.42486	1.34585e-12	up	0.304179	0.720982	unchanged	0.830895	3.84115e-05	unchanged
XUT0712	2.80023	1.07436e-07	up	0.836716	0.218679	unchanged	2.4523	0.0330993	up	0.916242	0.601098	unchanged	0.10297	0.85606	unchanged
XUT0713	1.93202	0.0905682	unchanged	-1.58785	1	unchanged	-2.1732	0.491661	unchanged	0.251156	NA	NA	-1.44823	0.143708	unchanged
XUT0715	1.69058	0.00234861	up	-0.423781	0.599775	unchanged	1.53742	0.094197	unchanged	0.750247	0.574399	unchanged	0.905204	0.275272	unchanged
XUT0716	1.6078	0.108688	unchanged	-1.16561	0.424882	unchanged	1.37985	0.482607	unchanged	-1.55257	NA	NA	-1.42803	0.119237	unchanged
XUT0717	2.13102	0.019935	up	0.480888	0.720222	unchanged	4.31409	0.00578429	up	-0.922304	NA	NA	-2.57909	0.000796922	down
XUT0718	3.61901	1.33207e-129	up	1.73987	9.54598e-29	up	2.52651	6.90618e-15	up	-0.555404	0.210706	unchanged	-1.28449	1.50416e-14	down
XUT0719	2.12627	3.67588e-05	up	0.227122	0.770237	unchanged	1.9857	0.0120556	up	-0.266252	0.847492	unchanged	0.122313	0.815713	unchanged
XUT0720	3.89944	6.2651e-14	up	0.240721	0.7795	unchanged	1.84474	0.0720918	unchanged	1.04815	0.461278	unchanged	0.397074	0.535806	unchanged
XUT0721	2.59081	0.00139863	up	1.54989	0.107618	unchanged	1.80036	0.126318	unchanged	-3.25787	NA	NA	-2.2411	0.0172174	down
XUT0722	1.17828	0.186779	unchanged	0.200549	0.878215	unchanged	2.0158	0.138315	unchanged	-1.2974	NA	NA	-0.12412	0.911795	unchanged
XUT0723	2.96081	0.00261009	up	2.30121	0.0399333	up	0.767624	0.58816	unchanged	0.622996	NA	NA	0.954761	0.179482	unchanged
XUT0724	3.59579	3.00573e-20	up	0.0330071	0.963601	unchanged	1.92747	0.0267725	up	1.05825	0.37034	unchanged	-0.334162	0.635662	unchanged
XUT0725	6.38792	0.000399043	up	2.85566	1	unchanged	4.2136	0.127586	unchanged	1.41938	NA	NA	-1.60651	0.547428	unchanged
XUT0726	1.8406	0.013787	up	0.377259	0.724939	unchanged	1.82049	0.170575	unchanged	-1.03954	NA	NA	0.463978	0.624094	unchanged
XUT0727	4.48218	2.61866e-36	up	2.39176	6.74615e-10	up	2.11188	0.00118342	up	1.34959	0.0885599	unchanged	3.51622	2.80005e-17	up
XUT0728	1.4476	0.0382937	up	0.692854	0.434523	unchanged	1.84624	0.0887289	unchanged	0.224701	0.907895	unchanged	0.844158	0.566026	unchanged
XUT0729	2.10779	0.000146521	up	0.624775	0.392559	unchanged	1.45643	0.107318	unchanged	0.088201	0.961534	unchanged	1.28717	0.000142775	up
XUT0730	2.0733	7.0423e-07	up	0.661474	0.207354	unchanged	1.70738	0.0553026	unchanged	-0.830427	0.565832	unchanged	-0.347624	0.542529	unchanged
XUT0731	3.00845	9.42208e-16	up	2.3338	2.98791e-09	up	2.81557	2.94248e-06	up	0.0106605	0.997057	unchanged	-1.32064	0.0103556	down
XUT0732	2.5259	1.63655e-07	up	1.24814	0.0267142	up	2.61164	0.000798441	up	-2.9366	0.0569509	unchanged	-3.38754	4.77242e-08	down
XUT0733	3.70694	7.90138e-25	up	1.89402	1.94097e-06	up	2.95039	8.54789e-05	up	1.34903	0.168045	unchanged	0.600988	0.0566556	unchanged
XUT0735	3.74705	1.40671e-13	up	1.25036	0.0470729	up	2.18523	0.0258089	up	1.22639	0.356567	unchanged	0.213749	0.731912	unchanged
XUT0736	2.1143	0.00484537	up	0.446246	0.67757	unchanged	1.92742	0.094008	unchanged	-1.53816	0.416512	unchanged	-2.02065	9.0173e-05	down
XUT0737	5.77604	1.05329e-06	up	3.82884	0.00423255	up	2.2902	0.0690228	unchanged	-0.474431	NA	NA	0.262149	0.770588	unchanged
XUT0738	3.09535	8.37531e-13	up	1.95729	3.43852e-05	up	2.55728	0.000954227	up	-1.92035	0.14192	unchanged	0.297716	0.484846	unchanged
XUT0739	3.85237	1.23e-33	up	1.64224	4.05997e-06	up	2.91936	9.14039e-05	up	0.709566	0.541462	unchanged	-1.00861	0.000704336	down
XUT0740	3.67854	5.63528e-26	up	2.08812	3.26002e-08	up	3.23958	1.09178e-05	up	0.843859	0.451954	unchanged	-1.47373	1.37926e-07	down
XUT0741	3.37054	8.63765e-54	up	2.20867	1.27996e-22	up	1.90444	1.40973e-07	up	-2.34616	1.53308e-07	down	-2.44861	1.63281e-41	down
XUT0742	3.29815	4.51032e-10	up	1.18787	0.0692018	unchanged	3.67953	2.4133e-06	up	0.320152	0.825897	unchanged	1.02686	0.0344589	up
XUT0743	3.04148	7.18127e-71	up	2.06187	6.07576e-32	up	1.94689	8.37365e-11	up	1.22151	0.000161087	up	0.69019	0.00204856	unchanged
XUT0744	0	1	unchanged	0	1	unchanged	NA	NA	NA	NA	NA	NA	0.83358	0.879918	unchanged
XUT0745	4.85355	8.51214e-56	up	2.01632	3.87499e-09	up	2.92603	3.44034e-06	up	0.411128	0.700842	unchanged	-0.00251796	0.996483	unchanged
XUT0746	3.30614	1.83266e-07	up	2.44669	0.000422303	up	3.27826	0.00202294	up	-1.77421	0.369891	unchanged	-0.932608	0.193943	unchanged
XUT0747	4.04341	1.28521e-20	up	1.79097	0.000293796	up	2.0657	0.0252527	up	1.91314	0.0733973	unchanged	-0.84395	0.00273273	unchanged
XUT0748	2.19683	4.50994e-05	up	0.588184	0.410953	unchanged	1.81236	0.0800115	unchanged	0.675075	0.67436	unchanged	0.433205	0.635107	unchanged
XUT0749	4.43189	1.53647e-10	up	1.58446	0.0666324	unchanged	2.90357	0.0510603	unchanged	-3.02794	NA	NA	-1.70726	0.0286777	down
XUT0750	2.3792	1.7935e-09	up	0.864455	0.0710133	unchanged	2.11351	0.00246818	up	-0.735899	0.517421	unchanged	-0.908535	0.0377426	unchanged
XUT0751	3.83456	4.15128e-22	up	1.30471	0.00573878	up	1.59736	0.0259608	up	-0.693896	0.522496	unchanged	0.343038	0.382531	unchanged
XUT0752	1.4295	0.0668861	unchanged	-0.42917	0.707141	unchanged	0.84688	0.576141	unchanged	-0.118598	NA	NA	0.333742	0.916307	unchanged
XUT0753	3.4794	5.75854e-20	up	1.61139	0.000174416	up	1.80698	0.033949	up	0.530521	0.694241	unchanged	0.185221	0.684586	unchanged
XUT0754	2.96179	2.22734e-09	up	1.00827	0.0993683	unchanged	1.98916	0.119461	unchanged	-0.223607	NA	NA	-2.80981	1.71426e-14	down
XUT0755	3.26701	3.63332e-29	up	1.48101	4.34166e-06	up	1.89162	0.00343284	up	-0.732085	0.464526	unchanged	-0.666241	0.0237534	unchanged
XUT0756	2.56727	4.59157e-08	up	2.00839	6.61039e-05	up	2.09073	0.00404438	up	-0.306108	0.815732	unchanged	-0.577759	0.231614	unchanged
XUT0757	3.72722	7.3326e-23	up	1.48755	0.000652086	up	3.33599	7.76786e-06	up	1.78139	0.0506157	unchanged	-0.184448	0.700947	unchanged
XUT0758	3.80129	1.61719e-83	up	1.39586	9.44426e-11	up	2.43371	5.29912e-10	up	0.225325	0.737613	unchanged	1.11313	0.000137507	up
XUT0759	3.49293	2.89742e-35	up	2.17859	2.27124e-13	up	1.77437	0.00514082	up	0.170853	0.879025	unchanged	-0.395713	0.15228	unchanged
XUT0760	2.42477	3.2664e-15	up	1.07029	0.00228285	up	1.80076	0.00179706	up	1.76698	0.00491142	up	2.80533	1.63605e-25	up
XUT0761	3.64694	5.79831e-76	up	2.46692	7.73339e-34	up	2.94998	1.39438e-15	up	0.121075	0.85473	unchanged	-1.03467	3.15353e-05	down
XUT0762	1.68876	0.204063	unchanged	-0.480951	1	unchanged	6.15025	0.00421164	up	1.4298	NA	NA	0.77336	0.671113	unchanged
XUT0764	3.45378	0.000539755	up	1.74304	0.155925	unchanged	2.26928	0.386381	unchanged	-2.50959	NA	NA	-2.78013	0.1099	unchanged
XUT0765	3.07848	1.12175e-45	up	1.27438	1.02133e-07	up	2.45661	1.15862e-11	up	-0.725721	0.151062	unchanged	-0.809784	0.00142622	unchanged
XUT0766	5.41862	0.00993212	up	3.26506	1	unchanged	1.12999	0.741461	unchanged	0.81088	NA	NA	2.3193	0.00369973	up
XUT0767	2.50716	6.89686e-13	up	0.292657	0.560416	unchanged	1.14493	0.101338	unchanged	-0.802203	0.436015	unchanged	-0.38078	0.208427	unchanged
XUT0768	3.0365	8.3919e-76	up	0.819397	7.44522e-06	unchanged	2.17393	6.82294e-13	up	0.429652	0.290526	unchanged	1.75369	5.18896e-11	up
XUT0769	2.42831	0.021551	up	0.231406	0.892358	unchanged	2.03429	0.117563	unchanged	-0.592693	NA	NA	2.67246	6.00662e-05	up
XUT0770	2.65762	7.40677e-05	up	1.84829	0.0145511	up	2.45973	0.0384176	up	-0.689091	0.756941	unchanged	-1.14096	0.0448887	down
XUT0771	1.96771	0.00975041	up	-0.352761	0.764584	unchanged	3.04262	0.0278301	up	0.76132	NA	NA	-1.54724	0.0101862	down
XUT0772	4.50565	1.19069e-91	up	2.8399	4.09315e-35	up	2.84498	6.7051e-11	up	0.827044	0.148198	unchanged	0.38628	0.28431	unchanged
XUT0773	3.63311	4.45327e-63	up	2.0661	9.59362e-20	up	2.11854	9.78991e-07	up	-1.21293	0.0355521	down	-1.94878	2.46125e-25	down
XUT0774	4.24149	5.76787e-22	up	2.10917	1.80642e-05	up	2.41249	0.00218648	up	-0.631834	0.652494	unchanged	0.872085	0.00704892	unchanged
XUT0775	1.19318	0.464712	unchanged	-0.917178	1	unchanged	3.62965	NA	NA	0	NA	NA	-2.31067	0.271127	unchanged
XUT0776	1.6904	0.467054	unchanged	1.18211	1	unchanged	1.48514	0.773038	unchanged	-3.12428	NA	NA	-1.87684	0.352289	unchanged
XUT0777	2.16757	0.297917	unchanged	-0.202357	1	unchanged	1.92346	0.369385	unchanged	0.956063	NA	NA	-0.744624	0.689427	unchanged
XUT0778	3.27889	2.91419e-43	up	2.40078	1.09625e-22	up	3.63741	8.65644e-18	up	1.18274	0.0206114	up	0.985698	4.0906e-06	unchanged
XUT0779	2.98161	6.49386e-06	up	0.609276	0.51412	unchanged	1.48314	0.251371	unchanged	-0.0438295	NA	NA	-0.564919	0.209832	unchanged
XUT0780	3.56696	4.30013e-74	up	1.90221	1.88365e-20	up	3.00424	4.64805e-17	up	0.000394972	1	unchanged	-0.23644	0.449845	unchanged
XUT0781	3.54443	1.34978e-64	up	2.55306	9.31468e-33	up	3.15323	1.06229e-15	up	-0.13158	0.856744	unchanged	0.128632	0.638355	unchanged
XUT0782	5.2464	4.15149e-10	up	4.55582	3.23044e-07	up	2.37067	0.0148618	up	-1.76067	0.289118	unchanged	-0.214499	0.663063	unchanged
XUT0783	2.76682	0.00132517	up	0.533171	0.675547	unchanged	1.15997	0.397392	unchanged	-1.11457	NA	NA	0.0511346	0.938709	unchanged
XUT0784	3.76038	4.21433e-06	up	2.06088	0.0320492	up	5.53205	0.0123176	up	1.42883	NA	NA	-0.766248	0.372775	unchanged
XUT0785	1.9727	0.0545896	unchanged	0.697663	0.619405	unchanged	-0.42429	0.837885	unchanged	1.49512	NA	NA	1.57165	0.114833	unchanged
XUT0786	1.79239	0.0131253	up	-0.385256	0.728118	unchanged	1.57644	0.206713	unchanged	-0.33077	NA	NA	0.926758	0.0302836	unchanged
XUT0787	4.37952	1.45838e-27	up	2.49764	1.00663e-08	up	1.91174	0.0149364	up	0.944794	0.380863	unchanged	-0.282575	0.453401	unchanged
XUT0788	6.02673	3.22078e-13	up	4.10855	4.83762e-06	up	0	1	unchanged	2.46505	NA	NA	-0.932747	0.209185	unchanged
XUT0789	3.80455	5.59528e-24	up	1.51352	0.000498047	up	3.44871	3.11163e-05	up	0.88643	0.487815	unchanged	0.253915	0.458852	unchanged
XUT0790	5.60164	3.05675e-14	up	1.42176	0.145941	unchanged	2.20342	0.171425	unchanged	-1.52319	NA	NA	0.370228	0.607655	unchanged
XUT0791	2.48527	0.000635589	up	-0.056964	0.963726	unchanged	2.90296	0.0517293	unchanged	-0.0326277	NA	NA	-0.347257	0.573983	unchanged
XUT0793	2.41209	8.08286e-18	up	1.28957	2.62652e-05	up	2.806	1.36976e-10	up	-0.37905	0.613238	unchanged	-1.33032	1.20974e-06	down
XUT0794	2.82614	0.0092676	up	1.66984	0.209124	unchanged	2.99093	0.122378	unchanged	-0.0837729	NA	NA	-1.41077	0.344711	unchanged
XUT0795	1.90206	0.00198173	up	0.960663	0.200107	unchanged	3.36256	0.00112665	up	-2.60237	0.251856	unchanged	-2.317	0.000941635	down
XUT0796	2.19039	0.0256215	up	2.08248	0.0570103	unchanged	1.55194	0.178221	unchanged	-3.63412	0.0953591	unchanged	-1.26088	0.40391	unchanged
XUT0797	4.69652	2.39732e-15	up	2.64535	6.25508e-05	up	2.46394	0.00923344	up	-1.35107	0.399149	unchanged	0.9334	0.23896	unchanged
XUT0798	3.60244	5.64694e-08	up	0.890625	0.329189	unchanged	1.52168	0.146076	unchanged	0.879966	0.55848	unchanged	0.0191849	0.981927	unchanged
XUT0800	4.0798	2.58273e-05	up	2.07554	0.0774299	unchanged	2.54318	0.0754713	unchanged	-1.99417	NA	NA	-0.267433	0.797999	unchanged
XUT0801	2.29286	0.00102583	up	0.909169	0.308831	unchanged	2.15637	0.12975	unchanged	-0.708458	NA	NA	1.22249	0.0196588	up
XUT0802	3.61826	8.78225e-18	up	2.05668	9.01604e-06	up	2.59468	0.00127343	up	1.16781	0.284406	unchanged	0.0121263	0.981927	unchanged
XUT0803	1.91952	3.78736e-05	up	0.664863	0.257641	unchanged	0.763179	0.367273	unchanged	-0.162554	0.91339	unchanged	-0.087649	0.839738	unchanged
XUT0804	3.19253	6.85057e-15	up	1.51602	0.00114013	up	2.51566	0.000103926	up	0.350697	0.751668	unchanged	1.73694	1.23092e-06	up
XUT0805	4.68002	1.12852e-57	up	1.51517	7.84069e-06	up	0.864925	0.0323351	unchanged	0.729224	0.130703	unchanged	4.17679	4.09891e-77	up
XUT0806	2.33835	5.3307e-06	up	0.387177	0.59345	unchanged	1.23472	0.253336	unchanged	-5.46202	0.00662731	down	-1.0797	0.0608536	unchanged
XUT0807	3.89965	0.00228741	up	2.84133	0.0550873	unchanged	2.95605	0.244477	unchanged	-1.4587	NA	NA	1.38421	0.118514	unchanged
XUT0808	2.77366	9.39201e-14	up	3.05331	3.66308e-16	up	2.02932	0.000247752	up	0.191473	0.84418	unchanged	-0.472425	0.18533	unchanged
XUT0809	1.95902	1.07399e-08	up	0.229391	0.641173	unchanged	1.32525	0.0575955	unchanged	-1.45329	0.137879	unchanged	-0.820362	0.0871287	unchanged
XUT0810	1.95941	5.86145e-08	up	1.86632	5.47607e-07	up	2.97238	1.61971e-07	up	0.514662	0.569009	unchanged	0.436513	0.269343	unchanged
XUT0811	4.6515	8.75363e-50	up	1.86619	1.03178e-07	up	1.5907	0.0121609	up	-0.000113811	1	unchanged	0.669468	0.0166493	unchanged
XUT0812	2.21055	0.019492	up	1.43665	0.207793	unchanged	2.04649	0.139377	unchanged	0.338672	NA	NA	-1.2367	0.056757	unchanged
XUT0813	2.51027	6.98763e-05	up	0.139716	0.893696	unchanged	2.97762	0.0250238	up	1.00518	0.631331	unchanged	0.115331	0.89674	unchanged
XUT0814	2.55436	5.24149e-06	up	0.64873	0.38953	unchanged	2.20093	0.0594138	unchanged	-0.308324	0.887985	unchanged	-1.03176	0.0805103	unchanged
XUT0815	3.41256	1.89613e-70	up	2.32715	4.84667e-32	up	2.60823	2.21308e-14	up	0.139864	0.81218	unchanged	-0.746292	2.76127e-05	unchanged
XUT0816	2.425	1.41733e-11	up	1.71025	8.69581e-06	up	1.90823	0.0078319	up	-0.233856	0.855441	unchanged	-1.13017	0.206225	unchanged
XUT0817	4.09318	7.7976e-27	up	2.89976	4.67674e-13	up	2.63547	4.88591e-05	up	0.846037	0.361366	unchanged	-0.39075	0.214443	unchanged
XUT0818	3.40997	0.00546772	up	1.55222	0.331164	unchanged	1.57583	0.397871	unchanged	-0.592595	NA	NA	-0.0313914	0.977364	unchanged
XUT0819	2.58123	0.000164181	up	0.981865	0.262444	unchanged	3.68213	0.0001703	up	-3.99267	0.0565075	unchanged	-1.25249	0.144357	unchanged
XUT0820	3.84964	1.58376e-38	up	2.12477	2.10681e-11	up	2.43651	6.41693e-05	up	-1.97682	0.0385066	down	-0.56862	0.0496689	unchanged
XUT0821	3.05725	1.69801e-15	up	-0.527561	0.358156	unchanged	2.70065	3.96e-05	up	0.465683	0.666071	unchanged	-0.945206	0.1166	unchanged
XUT0822	2.65131	5.52969e-11	up	2.01994	2.65012e-06	up	2.46774	5.10781e-05	up	-0.629991	0.531565	unchanged	-1.27708	0.000123349	down
XUT0823	3.43949	0.000594875	up	0.823402	0.567871	unchanged	4.33337	0.0371307	up	2.40626	NA	NA	-0.121755	0.904423	unchanged
XUT0824	3.50645	9.84409e-15	up	1.7763	0.00053526	up	1.33595	0.111275	unchanged	0.283855	0.838363	unchanged	-0.731496	0.0713126	unchanged
XUT0826	3.40141	1.82402e-08	up	0.620413	0.470056	unchanged	1.26944	0.352735	unchanged	-1.49514	NA	NA	-0.742346	0.41172	unchanged
XUT0827	2.13461	9.7898e-05	up	0.409005	0.598406	unchanged	2.80179	0.00187237	up	0.193134	0.911571	unchanged	-0.524725	0.387951	unchanged
XUT0828	1.6565	2.05765e-05	up	1.3252	0.00156322	up	3.08569	1.03953e-06	up	-1.33998	0.193398	unchanged	-2.01713	6.22231e-07	down
XUT0829	3.17583	3.16853e-58	up	2.19299	3.60856e-27	up	2.9676	1.62431e-13	up	-1.64972	0.00390986	down	-2.53524	2.89722e-23	down
XUT0830	3.47123	4.2709e-07	up	0.668019	0.499587	unchanged	2.14998	0.0754637	unchanged	-0.07596	0.981249	unchanged	-1.27434	0.24038	unchanged
XUT0831	3.45903	7.88917e-26	up	0.825688	0.0487675	unchanged	2.29953	5.71538e-05	up	2.06272	0.000829914	up	2.01424	1.53971e-05	up
XUT0832	3.98227	9.564e-138	up	1.77165	4.35991e-26	up	2.49182	4.28632e-15	up	0.122105	0.824512	unchanged	-0.786222	3.70395e-07	unchanged
XUT0833	4.3926	4.49649e-18	up	2.26215	7.18829e-05	up	2.16489	0.00967492	up	-0.536628	0.720149	unchanged	-0.247624	0.745505	unchanged
XUT0834	2.42567	0.00581613	up	0.499647	0.695231	unchanged	2.44643	0.20458	unchanged	0.0578064	NA	NA	-0.18426	0.908414	unchanged
XUT0835	1.81821	0.0276819	up	1.08952	0.281591	unchanged	4.94683	0.0299548	up	1.5013	NA	NA	0.575859	0.343929	unchanged
XUT0836	1.82715	0.0703698	unchanged	0.463478	0.74939	unchanged	0.181047	0.924805	unchanged	0.0198113	NA	NA	-0.29006	0.710797	unchanged
XUT0837	1.87738	0.00593478	up	0.552691	0.54989	unchanged	3.7535	0.00605565	up	-0.0279215	0.996382	unchanged	-0.167784	0.792184	unchanged
XUT0838	1.8465	0.0133995	up	0.123972	0.916561	unchanged	1.6585	0.252193	unchanged	-0.593862	NA	NA	-2.13872	0.00124224	down
XUT0839	3.68905	0.000732805	up	1.91967	0.152566	unchanged	0.911059	0.604723	unchanged	0.0999098	NA	NA	0.916173	0.327871	unchanged
XUT0840	2.47176	0.00029975	up	1.49694	0.0604722	unchanged	0.934029	0.42799	unchanged	1.18813	0.436015	unchanged	0.978132	0.153662	unchanged
XUT0841	3.00605	7.56229e-05	up	1.83135	0.0382602	up	3.54396	0.00398448	up	-1.96948	0.448729	unchanged	-2.67103	0.00148416	down
XUT0842	2.32204	5.95512e-44	up	0.766035	3.89606e-05	unchanged	2.50842	1.84222e-16	up	0.158416	0.75529	unchanged	-1.02583	3.4543e-07	down
XUT0844	1.92654	1.49447e-13	up	0.900844	0.00208244	unchanged	2.29691	6.00894e-07	up	0.534532	0.424943	unchanged	1.68725	0.0502332	unchanged
XUT0845	3.62787	2.66068e-25	up	1.57122	7.04681e-05	up	2.32996	0.000143837	up	-0.534197	0.605278	unchanged	-1.6688	5.63374e-05	down
XUT0846	3.08067	2.98826e-12	up	0.725199	0.210258	unchanged	1.67511	0.0482144	up	-0.358751	0.805423	unchanged	1.04319	0.0141046	up
XUT0847	2.60845	1.37936e-06	up	0.545935	0.468348	unchanged	2.67062	0.007143	up	0.0111631	0.997966	unchanged	0.755759	0.279914	unchanged
XUT0848	3.70944	0.000287347	up	1.52941	0.247017	unchanged	1.88426	0.156865	unchanged	0.566852	NA	NA	0.562191	0.672801	unchanged
XUT0849	4.4223	0.0166865	up	1.40584	1	unchanged	3.74681	0.0942292	unchanged	0.0330157	NA	NA	3.48609	0.031061	up
XUT0850	2.46345	0.161471	unchanged	1.41792	1	unchanged	1.09083	0.607227	unchanged	-3.51619	NA	NA	1.56542	0.200387	unchanged
XUT0851	NA	NA	NA	NA	NA	NA	NA	NA	NA	NA	NA	NA	NA	NA	NA
XUT0852	3.73739	0.00120288	up	0.24438	0.904855	unchanged	3.64682	0.0139601	up	0.0132202	0.998581	unchanged	3.57615	0.0751167	unchanged
XUT0853	5.08907	0.011527	up	2.87298	1	unchanged	1.14495	0.695311	unchanged	-0.0621745	NA	NA	-1.08997	0.842749	unchanged
XUT0854	3.94436	1.17588e-16	up	1.96223	0.000282016	up	2.17442	0.00439257	up	-0.641439	0.626606	unchanged	-0.989497	0.033374	unchanged
XUT0855	2.51136	8.99943e-06	up	1.01617	0.1456	unchanged	2.00392	0.0200842	up	0.502367	0.720982	unchanged	2.61102	1.26719e-05	up
XUT0857	2.37196	3.51756e-05	up	1.19764	0.0784638	unchanged	4.61192	6.62932e-05	up	1.19001	0.512713	unchanged	-0.232883	0.674619	unchanged
XUT0858	1.8938	0.00031153	up	-0.0422559	0.962511	unchanged	2.96496	5.47293e-05	up	-0.305364	0.825548	unchanged	-1.57187	0.000404036	down
XUT0859	2.51821	7.48569e-10	up	0.383617	0.502524	unchanged	1.57817	0.0601171	unchanged	-0.255957	0.860565	unchanged	1.56855	0.00578401	up
XUT0860	3.94716	4.1388e-137	up	2.35806	2.0013e-47	up	3.27082	6.7059e-26	up	-0.326887	0.503871	unchanged	-0.685342	0.00226233	unchanged
XUT0861	1.99624	0.000376171	up	0.975931	0.149802	unchanged	2.33116	0.00761894	up	0.829133	0.523107	unchanged	2.07075	4.42444e-06	up
XUT0862	3.55964	0.00400849	up	1.39691	0.396384	unchanged	4.62692	0.0895921	unchanged	0	NA	NA	-0.176073	0.91629	unchanged
XUT0863	2.46455	3.81631e-17	up	0.651498	0.0683625	unchanged	2.40915	0.000118857	up	-0.385156	0.73191	unchanged	0.373614	0.360294	unchanged
XUT0864	3.90927	0.00518687	up	2.40333	0.157246	unchanged	2.70746	0.177549	unchanged	-1.07847	NA	NA	-1.72055	0.347961	unchanged
XUT0865	0.276899	0.748751	unchanged	-0.599072	0.579588	unchanged	-0.219772	0.880958	unchanged	-1.76449	NA	NA	-0.656049	0.562016	unchanged
XUT0867	3.73027	1.1921e-11	up	1.63964	0.0114542	up	2.32059	0.0595703	unchanged	-1.49006	0.49855	unchanged	-0.924943	0.193943	unchanged
XUT0868	4.28074	3.35034e-08	up	2.638	0.00268959	up	0.803652	0.456187	unchanged	-0.175738	0.927664	unchanged	1.50817	0.00255332	up
XUT0869	3.87243	3.4894e-59	up	2.66643	2.82642e-27	up	1.96181	0.000574683	up	-0.932988	0.269357	unchanged	-1.72391	2.75336e-09	down
XUT0870	2.97357	0.000190261	up	1.69875	0.0716726	unchanged	2.6641	0.134815	unchanged	-3.0345	NA	NA	-1.14051	0.324144	unchanged
XUT0871	3.85249	1.56612e-08	up	1.97272	0.0132031	up	3.92755	0.0130908	up	0.613246	NA	NA	-1.8799	0.0561548	unchanged
XUT0872	2.97226	8.56956e-06	up	1.00796	0.239791	unchanged	1.70926	0.170071	unchanged	0.223496	NA	NA	-0.206591	0.738932	unchanged
XUT0873	3.39631	1.50794e-26	up	2.86595	1.70308e-18	up	4.10969	7.58047e-13	up	-0.688814	0.51423	unchanged	-1.8892	5.37059e-07	down
XUT0874	4.47298	1.09361e-21	up	2.18223	3.28555e-05	up	1.88788	0.03205	up	-1.0092	0.473169	unchanged	0.060131	0.880167	unchanged
XUT0875	2.00035	0.0866664	unchanged	1.06255	1	unchanged	1.5026	0.481406	unchanged	-3.42783	NA	NA	1.20188	0.105236	unchanged
XUT0876	1.04921	0.477215	unchanged	-0.963372	1	unchanged	2.62695	0.371784	unchanged	1.52859	NA	NA	0.266307	0.908292	unchanged
XUT0877	2.19231	5.45851e-06	up	0.963248	0.0958905	unchanged	2.22574	0.00321856	up	-0.122644	0.935249	unchanged	0.157656	0.750593	unchanged
XUT0878	3.83364	9.2771e-07	up	1.34978	0.180088	unchanged	3.97837	0.00916607	up	0.611189	NA	NA	0.687379	0.377584	unchanged
XUT0879	5.68966	0.00526879	up	3.581	1	unchanged	4.43503	0.202036	unchanged	0	NA	NA	0.829142	0.736294	unchanged
XUT0880	1.69552	0.00466537	up	0.577078	0.463316	unchanged	0.375138	0.711657	unchanged	-1.73184	0.210706	unchanged	2.23867	5.50358e-07	up
XUT0881	2.20316	1.11438e-07	up	1.24585	0.00794558	up	2.20956	0.00162598	up	0.0413951	0.982823	unchanged	-0.537726	0.125843	unchanged
XUT0882	4.62884	1.63193e-31	up	2.19362	6.38164e-07	up	3.34401	6.20678e-08	up	-0.400742	0.733608	unchanged	0.0966845	0.813735	unchanged
XUT0883	1.43403	0.0558921	unchanged	-0.668028	0.532653	unchanged	0.831685	0.457598	unchanged	-1.24239	0.461278	unchanged	0.388504	0.558363	unchanged
XUT0884	4.60951	6.04387e-23	up	2.0307	0.0001471	up	4.66711	0.000301465	up	2.78747	0.0778137	unchanged	0.0891606	0.854824	unchanged
XUT0885	4.87042	9.33415e-20	up	2.1127	0.00059006	up	2.36344	0.00700678	up	0.642113	0.642397	unchanged	-0.57732	0.291897	unchanged
XUT0886	2.95835	0.0238116	up	0.149077	1	unchanged	1.76634	0.459602	unchanged	0.144963	NA	NA	0.269787	0.736214	unchanged
XUT0887	2.29942	0.0280342	up	0.00425989	0.998193	unchanged	3.37809	0.185276	unchanged	1.04283	NA	NA	-1.03171	0.501601	unchanged
XUT0888	3.8157	2.63875e-34	up	1.59851	5.3967e-06	up	2.24272	5.78585e-05	up	1.45666	0.0248797	up	1.24499	0.0650202	unchanged
XUT0890	0.57453	0.608793	unchanged	0.141331	1	unchanged	2.12753	0.271765	unchanged	0.96373	NA	NA	-3.01934	0.16974	unchanged
XUT0891	0.820599	0.0490982	unchanged	0.721527	0.125297	unchanged	2.09775	0.00322866	up	-0.905531	0.420548	unchanged	-1.49281	0.000433201	down
XUT0892	0.958046	0.50918	unchanged	0.101257	1	unchanged	3.62694	0.141178	unchanged	3.00468	NA	NA	-1.48923	0.0703834	unchanged
XUT0893	2.30483	6.84096e-13	up	-0.53067	0.246713	unchanged	1.74174	0.000878584	up	1.12011	0.0740509	unchanged	-0.355246	0.322024	unchanged
XUT0894	3.39938	5.42349e-13	up	1.19736	0.0373827	up	2.15505	0.0248539	up	1.19402	0.35593	unchanged	0.775181	0.206035	unchanged
XUT0895	2.36445	0.000314694	up	0.658712	0.456992	unchanged	2.35378	0.0690214	unchanged	1.49536	NA	NA	0.372114	0.618748	unchanged
XUT0896	2.4968	3.80003e-07	up	0.333378	0.646049	unchanged	1.77672	0.0539864	unchanged	1.16724	0.335949	unchanged	-0.353107	0.511562	unchanged
XUT0897	2.73741	0.000441182	up	1.17912	0.22974	unchanged	1.36245	0.146566	unchanged	-0.395666	0.80303	unchanged	-0.908882	0.160075	unchanged
XUT0898	4.96565	5.98189e-35	up	2.02395	9.33834e-06	up	2.43248	0.00593227	up	0.810823	0.544771	unchanged	-1.0107	0.00699258	down
XUT0899	3.00794	0.000306756	up	1.21095	0.256398	unchanged	0.505508	0.745434	unchanged	1.02221	NA	NA	1.18718	0.273145	unchanged
XUT0900	4.4637	6.80978e-16	up	2.97963	6.32983e-07	up	1.6858	0.0590075	unchanged	-0.224302	0.890792	unchanged	1.08728	0.0652463	unchanged
XUT0902	2.42786	0.000246261	up	0.770907	0.376673	unchanged	1.04775	0.36866	unchanged	-0.13074	NA	NA	0.0458497	0.967129	unchanged
XUT0903	3.12782	0.000309895	up	0.476659	0.720658	unchanged	0.686434	0.61533	unchanged	-0.214524	NA	NA	0.762127	0.531814	unchanged
XUT0904	3.59471	3.59086e-49	up	2.42671	8.92177e-22	up	2.47166	3.1036e-08	up	0.239604	0.753761	unchanged	-0.378824	0.121522	unchanged
XUT0905	3.61829	2.19572e-08	up	1.70408	0.0269114	up	1.4933	0.0809493	unchanged	1.43318	0.162448	unchanged	2.21425	1.1995e-10	up
XUT0906	4.33331	1.12856e-33	up	2.39264	6.26024e-10	up	2.76926	0.000844483	up	-0.30804	0.844412	unchanged	-1.2016	0.00590122	down
XUT0907	1.6444	0.0441523	up	0.0481147	0.97031	unchanged	6.75576	0.000307669	up	3.56283	0.145077	unchanged	1.08446	0.5834	unchanged
XUT0908	2.7566	3.02242e-05	up	0.233275	0.828672	unchanged	1.40652	0.0957305	unchanged	0.999175	0.368947	unchanged	-1.88343	0.0163917	down
XUT0909	3.73242	2.98541e-84	up	2.40632	7.83753e-34	up	3.0896	2.07111e-17	up	2.62808	9.03512e-13	up	-0.853731	1.26399e-05	unchanged
XUT0910	2.78587	7.81322e-06	up	1.50278	0.0391955	up	1.81058	0.0439745	up	-1.68372	0.244008	unchanged	-1.34287	0.0401007	down
XUT0911	4.83445	1.11539e-27	up	1.5924	0.00265287	up	3.43904	0.000827567	up	0.0213121	0.996382	unchanged	1.53551	7.51683e-07	up
XUT0912	2.81621	0.00089104	up	-0.0054325	0.99726	unchanged	1.32258	0.385199	unchanged	0.235584	NA	NA	2.1191	2.90672e-05	up
XUT0914	2.4686	9.12807e-06	up	0.442765	0.574355	unchanged	2.03725	0.0612126	unchanged	-0.484896	0.801562	unchanged	-0.764757	0.0861187	unchanged
XUT0915	4.01333	0.0509438	unchanged	1.38667	1	unchanged	0	NA	NA	0	NA	NA	NA	NA	NA
XUT0916	2.71255	9.57137e-07	up	1.69821	0.0065181	up	1.55985	0.150372	unchanged	0.903098	0.561203	unchanged	1.5774	0.000248279	up
XUT0917	6.52375	1.07562e-08	up	3.96058	0.00212178	up	2.7177	0.0327424	up	-2.05573	0.429664	unchanged	-0.265855	0.821252	unchanged
XUT0918	3.34495	7.33581e-16	up	1.67667	0.000347695	up	2.95558	5.08329e-06	up	0.723506	0.460494	unchanged	0.852302	0.00899842	unchanged
XUT0919	3.1525	0.00528192	up	0.984295	0.531992	unchanged	1.89773	0.287764	unchanged	0.593628	NA	NA	-0.804816	0.700947	unchanged
XUT0921	4.70151	2.35129e-11	up	2.56993	0.00133614	up	2.08486	0.0621105	unchanged	0.8919	0.593137	unchanged	-0.354055	0.5946	unchanged
XUT0922	2.88878	1.01102e-05	up	1.09977	0.181622	unchanged	2.08016	0.09183	unchanged	0.672843	NA	NA	-2.0521	0.00617188	down
XUT0923	1.5683	0.0462596	up	0.284389	0.806199	unchanged	3.66605	0.0221741	up	0.976117	NA	NA	-1.08782	0.0578437	unchanged
XUT0924	3.0047	0.000293239	up	0.458469	0.720658	unchanged	2.58588	0.0526147	unchanged	1.96372	0.244008	unchanged	1.66763	0.0155145	up
XUT0925	5.06276	3.02328e-125	up	2.10382	2.60531e-20	up	2.58386	1.88712e-12	up	-0.0985916	0.884949	unchanged	-0.136721	0.620107	unchanged
XUT0926	4.17597	3.37813e-11	up	1.74499	0.0209987	up	3.11938	0.0048099	up	0.791776	0.666861	unchanged	-0.312653	0.486903	unchanged
XUT0927	NA	NA	NA	NA	NA	NA	1.18471	0.00159643	up	-0.875563	0.0607829	unchanged	-0.531308	0.151559	unchanged
XUT0928	NA	NA	NA	NA	NA	NA	1.67977	3.62222e-06	up	-1.29607	0.00318156	down	1.88194	4.52858e-08	up
XUT0929	4.94025	6.36627e-09	up	3.706	6.4488e-05	up	2.64505	0.00603897	up	-0.430168	0.810789	unchanged	-1.80744	4.60017e-05	down
XUT0930	4.67459	2.81626e-07	up	3.70819	0.000186584	up	4.2361	0.00526899	up	-0.0250331	0.997295	unchanged	-0.855766	0.1022	unchanged
XUT0931	3.35517	4.50988e-14	up	2.61325	2.59227e-08	up	2.64419	0.000154555	up	0.432746	0.720888	unchanged	-0.238573	0.547428	unchanged
XUT0932	3.18101	5.823e-06	up	1.88574	0.0198379	up	2.48872	0.0227276	up	0.205984	0.922704	unchanged	-0.322112	0.442999	unchanged
XUT0933	3.20349	3.27758e-49	up	1.40028	2.95502e-09	up	1.49959	0.000652716	up	0.126474	0.868788	unchanged	0.127444	0.568982	unchanged
XUT0934	1.70152	0.231056	unchanged	0.995831	1	unchanged	1.5048	0.490713	unchanged	0.649887	NA	NA	-0.718298	0.69109	unchanged
XUT0935	0.309054	0.866387	unchanged	0.407075	1	unchanged	3.9499	0.211729	unchanged	1.41445	NA	NA	-0.430099	0.797999	unchanged
XUT0936	1.60527	0.109184	unchanged	0.561759	0.684333	unchanged	2.3217	0.192437	unchanged	-0.546113	NA	NA	0.75541	0.366839	unchanged
XUT0937	3.24962	3.53666e-07	up	1.11528	0.168423	unchanged	4.77853	0.00863056	up	2.02688	0.444692	unchanged	2.49421	2.83921e-05	up
XUT0938	2.8262	2.51947e-08	up	0.825676	0.201145	unchanged	2.17673	0.040987	up	-0.00620499	0.998905	unchanged	2.48217	0.000125262	up
XUT0939	4.14612	0.118321	unchanged	2.29431	1	unchanged	2.62146	NA	NA	0	NA	NA	0.83358	0.879918	unchanged
XUT0940	3.08156	0.00217557	up	0.553528	0.714488	unchanged	2.27105	0.241178	unchanged	-3.03693	NA	NA	-1.49079	0.193943	unchanged
XUT0942	3.32551	5.91266e-66	up	0.771076	0.000662844	unchanged	1.8615	1.9798e-05	up	0.0218433	0.986215	unchanged	0.843142	2.3086e-06	unchanged
XUT0943	2.13077	0.00564048	up	1.06247	0.266943	unchanged	3.18571	0.00711261	up	0.962752	0.605055	unchanged	1.32423	0.00193753	up
XUT0944	3.25055	3.35652e-35	up	0.56892	0.0879583	unchanged	1.09544	0.0550337	unchanged	0.739508	0.315569	unchanged	-0.0520779	0.867558	unchanged
XUT0945	2.75533	8.24801e-05	up	1.95384	0.0131369	up	1.84828	0.0743268	unchanged	-0.982239	0.566949	unchanged	-0.315891	0.579195	unchanged
XUT0946	1.5158	0.00927711	up	1.03291	0.127421	unchanged	2.94048	0.00687554	up	0.450246	0.81555	unchanged	-0.698357	0.132426	unchanged
XUT0947	2.9973	1.86822e-08	up	1.70755	0.00476038	up	1.29707	0.159723	unchanged	-0.617495	0.683539	unchanged	-0.761133	0.26796	unchanged
XUT0948	2.8048	6.70781e-09	up	1.03946	0.0784089	unchanged	2.24063	0.0123255	up	-0.524676	0.744759	unchanged	-0.802772	0.126778	unchanged
XUT0949	2.45864	5.30133e-10	up	0.97912	0.0366819	unchanged	1.57325	0.0181061	up	-0.145622	0.904791	unchanged	-0.317848	0.643029	unchanged
XUT0950	2.10491	0.000627215	up	1.10528	0.133689	unchanged	2.32132	0.0267105	up	-1.13263	0.525844	unchanged	-2.24419	0.000126627	down
XUT0951	2.55402	1.22779e-06	up	1.68392	0.00418676	up	2.81114	0.00573008	up	-3.01696	0.167111	unchanged	-1.67311	0.0166973	down
XUT0952	4.73666	6.19641e-47	up	1.75002	2.76691e-06	up	2.39807	0.000451523	up	1.36207	0.108219	unchanged	-0.655118	0.131593	unchanged
XUT0953	3.46348	7.15598e-52	up	2.16033	1.21423e-19	up	2.42498	1.48955e-08	up	-0.922792	0.133885	unchanged	-0.973814	0.00098459	unchanged
XUT0954	2.62576	6.6921e-11	up	2.34935	2.0775e-08	up	3.5138	1.80785e-05	up	-0.219047	0.89277	unchanged	-2.04905	6.10672e-06	down
XUT0955	4.45632	9.1084e-70	up	1.64812	5.25459e-09	up	1.93296	9.53804e-06	up	0.373797	0.574964	unchanged	0.0548893	0.855546	unchanged
XUT0957	2.34736	2.83678e-27	up	0.093264	0.783833	unchanged	1.41088	0.000135265	up	-0.425053	0.436308	unchanged	-1.00602	2.20588e-07	down
XUT0958	3.02218	4.27571e-11	up	2.17592	1.02362e-05	up	3.61021	4.80801e-07	up	-0.519553	0.714313	unchanged	0.289805	0.592151	unchanged
XUT0959	2.69706	3.81513e-06	up	1.30159	0.0620538	unchanged	3.0766	0.0025862	up	1.5319	0.262009	unchanged	1.3379	0.00380751	up
XUT0960	4.03434	1.92482e-14	up	1.78461	0.00372615	up	4.11424	8.27046e-06	up	1.39491	0.283616	unchanged	-0.466912	0.36681	unchanged
XUT0961	3.89742	3.71992e-233	up	2.42963	9.962e-89	up	3.05299	4.45248e-29	up	-0.381683	0.314259	unchanged	0.132648	0.657712	unchanged
XUT0962	3.34786	2.14986e-24	up	1.76751	7.73996e-07	up	2.81646	6.17916e-08	up	1.77442	0.00240599	up	0.466812	0.141864	unchanged
XUT0963	2.83557	1.39459e-05	up	2.2794	0.00137187	up	1.91934	0.0631225	unchanged	-1.2988	0.44124	unchanged	-0.513527	0.404699	unchanged
XUT0964	2.15481	1.1082e-10	up	1.10641	0.00327057	up	2.33057	0.000445353	up	-0.993211	0.352044	unchanged	0.20232	0.721386	unchanged
XUT0965	3.16917	0.00838525	up	2.40825	0.0845425	unchanged	2.83017	0.0557702	unchanged	-0.589375	NA	NA	1.04878	0.264656	unchanged
XUT0966	2.05612	0.326994	unchanged	-0.526042	1	unchanged	-0.921635	NA	NA	-2.53541	NA	NA	-0.404873	0.927071	unchanged
XUT0967	4.12344	1.11391e-16	up	2.47737	5.6241e-06	up	4.20456	5.05302e-07	up	-0.826844	0.620685	unchanged	-0.651173	0.230718	unchanged
XUT0968	3.20434	2.02138e-11	up	2.16304	3.17237e-05	up	2.7584	0.000694073	up	0.554777	0.68135	unchanged	-0.405869	0.33481	unchanged
XUT0969	2.94537	8.94973e-10	up	0.804754	0.196489	unchanged	2.82924	0.00250297	up	0.0461731	0.987532	unchanged	0.632655	0.22242	unchanged
XUT0970	3.6924	0.0625227	unchanged	0.812033	1	unchanged	-0.279805	0.906912	unchanged	-3.47297	NA	NA	0.469637	0.771238	unchanged
XUT0971	3.20299	0.00258618	up	2.46843	0.0421585	up	2.07594	0.173481	unchanged	1.24346	NA	NA	-0.929259	0.119897	unchanged
XUT0973	3.34426	7.46167e-16	up	2.18897	1.00808e-06	up	2.97445	3.97695e-05	up	0.01638	0.995832	unchanged	0.580928	0.174868	unchanged
XUT0974	3.26261	1.37379e-26	up	2.52901	1.24767e-15	up	2.3507	7.42694e-06	up	1.83366	0.00148351	up	4.51121	2.82472e-11	up
XUT0976	2.93328	0.00407703	up	0.799892	0.577183	unchanged	2.77146	0.12949	unchanged	-0.951566	NA	NA	0.342859	0.853959	unchanged
XUT0977	2.1537	9.50353e-05	up	1.96158	0.000720037	up	4.20392	1.24095e-10	up	1.82527	0.0224403	up	1.67914	5.31178e-05	up
XUT0978	1.24277	0.0198973	up	0.045802	0.957537	unchanged	1.42051	0.10854	unchanged	0.296396	0.838323	unchanged	-1.28307	0.0208147	down
XUT0980	2.31831	0.168104	unchanged	1.83082	1	unchanged	4.951	0.0552071	unchanged	2.59047	NA	NA	1.43464	0.598271	unchanged
XUT0981	4.23199	1.1593e-09	up	2.0667	0.0112835	up	2.91385	0.0308217	up	-0.892198	NA	NA	-1.27145	0.0563762	unchanged
XUT0982	2.08298	1.35003e-08	up	1.58541	5.31629e-05	up	2.46782	0.000340437	up	-0.916506	0.424511	unchanged	-1.70018	1.46363e-10	down
XUT0983	0.889434	0.408154	unchanged	-1.64534	1	unchanged	1.19886	0.532665	unchanged	-1.39882	NA	NA	-0.476725	0.739151	unchanged
XUT0984	1.14618	0.307817	unchanged	-0.932983	1	unchanged	0.734432	0.703639	unchanged	-4.04451	NA	NA	-3.91916	0.0304283	down
XUT0986	2.84284	1.99705e-25	up	2.10718	9.82103e-14	up	2.3856	7.03078e-06	up	-1.68063	0.0276343	down	-2.12314	3.15873e-17	down
XUT0987	4.18029	6.25427e-93	up	2.55065	1.86516e-33	up	3.24979	7.44062e-14	up	0.340934	0.631154	unchanged	1.83353	0.000630454	up
XUT0988	4.79879	3.74409e-114	up	2.78411	3.74984e-37	up	2.48111	6.75208e-13	up	1.05179	0.00858427	up	0.979163	1.05073e-05	unchanged
XUT0989	1.69253	0.031746	up	1.33931	0.142807	unchanged	2.77	0.121353	unchanged	0.103068	NA	NA	-0.796382	0.185481	unchanged
XUT0990	2.25858	0.00015313	up	-0.0336299	0.972827	unchanged	2.49703	0.0155236	up	-2.15043	0.242776	unchanged	0.645432	0.242636	unchanged
XUT0991	0.586646	0.465715	unchanged	-0.550015	0.605026	unchanged	1.8468	0.079364	unchanged	-2.62891	0.14673	unchanged	-1.77747	0.0568445	unchanged
XUT0992	2.2444	0.00548031	up	-0.0737412	0.956853	unchanged	2.4313	0.136663	unchanged	-3.42648	NA	NA	-1.98871	0.166073	unchanged
XUT0993	2.97984	7.68693e-05	up	1.23174	0.193032	unchanged	3.47647	0.0122972	up	0.00433111	NA	NA	-1.76724	0.00988785	down
XUT0994	3.29012	1.13014e-17	up	1.62408	0.000168461	up	2.3603	0.00378286	up	-0.646103	0.649515	unchanged	-0.696623	0.11042	unchanged
XUT0995	2.50629	0.000177335	up	0.564966	0.541293	unchanged	1.68232	0.23938	unchanged	-1.29531	NA	NA	-2.09382	0.0908381	unchanged
XUT0996	3.18319	3.9105e-14	up	1.38623	0.00467954	up	2.59346	0.00157226	up	1.66805	0.0982329	unchanged	4.20149	3.29033e-10	up
XUT0997	3.43733	1.37673e-23	up	1.57014	4.68802e-05	up	2.46639	1.53909e-05	up	0.00718225	0.997917	unchanged	0.456397	0.152764	unchanged
XUT0999	3.19491	9.84998e-80	up	2.18945	1.16875e-36	up	2.93202	7.62106e-19	up	0.240453	0.64485	unchanged	-0.481554	0.00733371	unchanged
XUT1000	2.74089	0.00225832	up	1.23798	0.280446	unchanged	4.82011	0.00714164	up	1.61442	0.568114	unchanged	1.63734	0.0172705	up
XUT1002	1.87293	0.0184745	up	1.33938	0.15165	unchanged	2.11113	0.253199	unchanged	-0.742807	NA	NA	-1.81876	0.251732	unchanged
XUT1003	3.00145	2.09699e-05	up	-0.758916	0.485555	unchanged	1.37579	0.371058	unchanged	-1.68494	NA	NA	-3.47594	0.0234374	down
XUT1005	0	1	unchanged	0	1	unchanged	0	NA	NA	0	NA	NA	-1.08997	0.842749	unchanged
XUT1007	2.06401	0.0135731	up	-0.839476	0.487964	unchanged	0.568411	0.811226	unchanged	-0.724164	NA	NA	-1.01631	0.0220866	down
XUT1008	1.1884	0.259547	unchanged	-1.28235	1	unchanged	0.986753	0.589842	unchanged	-0.436894	NA	NA	-0.160893	0.893394	unchanged
XUT1009	2.74685	0.000230323	up	1.0326	0.284328	unchanged	4.03576	0.0116854	up	-0.919008	NA	NA	1.09684	0.0727988	unchanged
XUT1011	1.71946	0.0891228	unchanged	1.54808	0.185505	unchanged	2.18403	0.130897	unchanged	-1.05912	NA	NA	-0.478666	0.487072	unchanged
XUT1012	3.81765	7.70635e-24	up	2.34454	8.79661e-09	up	3.72463	0.00028129	up	2.11869	0.0965695	unchanged	-0.719808	0.0392298	unchanged
XUT1013	2.59135	2.07807e-21	up	1.73408	1.70751e-09	up	2.80416	2.82638e-10	up	0.171385	0.832562	unchanged	0.324301	0.180377	unchanged
XUT1014	2.92414	2.03904e-18	up	1.34003	0.000367356	up	2.68743	7.62702e-06	up	-0.738606	0.453745	unchanged	-1.72135	1.38947e-07	down
XUT1015	2.63965	3.4083e-06	up	0.278295	0.749497	unchanged	1.31867	0.25497	unchanged	-0.260154	0.901371	unchanged	-0.721954	0.254428	unchanged
XUT1017	2.99655	3.71926e-15	up	1.84493	8.26147e-06	up	1.46294	0.038856	up	-0.910804	0.386178	unchanged	-1.76485	2.60863e-07	down
XUT1018	2.37419	6.80915e-06	up	0.435151	0.556359	unchanged	0.382979	0.689944	unchanged	-0.385992	0.797647	unchanged	-0.904514	0.0349916	unchanged
XUT1019	3.15714	5.75278e-19	up	1.62447	3.48742e-05	up	1.10143	0.0799978	unchanged	-0.412403	0.678228	unchanged	0.73551	0.00454271	unchanged
XUT1020	1.77291	0.00448753	up	0.611333	0.454784	unchanged	1.16809	0.299143	unchanged	-0.318975	0.868897	unchanged	-0.131402	0.884743	unchanged
XUT1021	2.37598	0.00289566	up	-0.152054	0.906769	unchanged	0.895639	0.604858	unchanged	-1.95997	NA	NA	-3.18771	1.46784e-07	down
XUT1022	4.06497	4.35048e-68	up	2.47352	3.01325e-24	up	2.84653	6.87637e-12	up	0.690162	0.224594	unchanged	-0.22715	0.342122	unchanged
XUT1023	6.2424	0.00165809	up	2.84195	1	unchanged	NA	NA	NA	NA	NA	NA	-2.39591	0.595759	unchanged
XUT1024	4.83915	2.36486e-05	up	2.23517	0.112887	unchanged	-1.22388	NA	NA	-1.39083	NA	NA	-1.30273	0.484122	unchanged
XUT1025	4.85858	2.69199e-05	up	2.02579	0.16504	unchanged	2.62138	NA	NA	0	NA	NA	-0.788876	0.763825	unchanged
XUT1026	2.94013	3.66074e-12	up	1.60864	0.000669455	up	3.57819	0.000198469	up	-0.603521	0.751813	unchanged	-2.54529	9.41974e-06	down
XUT1027	3.11108	0.00044569	up	1.93923	0.061856	unchanged	3.97048	0.0623298	unchanged	0.0301794	NA	NA	-2.8176	0.00326011	down
XUT1028	3.47862	1.07671e-23	up	1.85571	9.01241e-07	up	2.99539	5.57075e-06	up	0.448577	0.688734	unchanged	-1.6985	9.33385e-07	down
XUT1029	0.894633	0.343471	unchanged	0.6571	0.580934	unchanged	0.404272	0.799773	unchanged	0.066454	NA	NA	-2.06211	0.311525	unchanged
XUT1030	2.57389	9.68892e-06	up	2.57614	2.34729e-05	up	2.98335	0.000498276	up	-0.134831	0.937012	unchanged	-1.31575	0.000777139	down
XUT1031	1.6459	0.0151716	up	-0.124379	0.908078	unchanged	1.19175	0.380798	unchanged	-2.14889	NA	NA	-2.03155	0.0318368	down
XUT1032	2.36614	3.99809e-05	up	0.779446	0.294393	unchanged	2.63378	0.0157002	up	-1.78828	0.372562	unchanged	-1.95397	0.000936895	down
XUT1033	1.23608	0.099303	unchanged	-0.0293218	0.978956	unchanged	-0.178695	0.879819	unchanged	0.299343	0.865576	unchanged	0.880939	0.40522	unchanged
XUT1034	3.26871	3.97856e-22	up	2.83245	2.862e-16	up	3.06353	1.20664e-08	up	0.805295	0.285731	unchanged	0.0317038	0.939531	unchanged
XUT1036	3.63374	4.88678e-87	up	1.19948	3.53686e-09	up	3.62429	7.81251e-21	up	-0.738315	0.196161	unchanged	-1.68243	7.09624e-11	down
XUT1037	3.03901	6.87242e-14	up	1.24151	0.00886438	up	3.20577	4.55586e-05	up	0.292413	0.837693	unchanged	-2.0575	0.0142338	down
XUT1038	1.48543	2.25964e-08	up	0.966744	0.000788658	unchanged	2.58329	1.64432e-08	up	-0.106818	0.905011	unchanged	0.651893	0.0851483	unchanged
XUT1039	3.1511	1.05104e-07	up	1.72979	0.0114638	up	1.5517	0.0719003	unchanged	1.37972	0.188316	unchanged	0.199789	0.676876	unchanged
XUT1040	2.12475	0.000221868	up	0.910144	0.201322	unchanged	1.77848	0.0565642	unchanged	-1.81845	0.213087	unchanged	1.15877	0.0101601	up
XUT1041	3.54988	7.32521e-31	up	1.71222	3.67469e-07	up	2.45256	9.22085e-08	up	0.226071	0.773774	unchanged	1.69457	1.27632e-08	up
XUT1042	4.79685	3.0114e-14	up	2.40888	0.000830988	up	3.99475	0.00784155	up	1.40536	0.539468	unchanged	0.273358	0.749595	unchanged
XUT1043	3.92597	0.00545568	up	2.13108	1	unchanged	4.79629	0.0487318	up	2.57946	NA	NA	-0.918182	0.436264	unchanged
XUT1044	2.62578	1.87333e-06	up	0.632105	0.396912	unchanged	1.76818	0.0606564	unchanged	0.166845	0.924605	unchanged	-0.0899476	0.899153	unchanged
XUT1045	2.74389	0.0228483	up	0.809608	1	unchanged	1.57619	0.392881	unchanged	-3.03458	NA	NA	-1.88506	0.120439	unchanged
XUT1046	2.80419	2.22502e-16	up	1.84311	4.74225e-07	up	2.92025	1.90384e-06	up	0.596139	0.534086	unchanged	1.53185	0.0410667	up
XUT1047	2.81153	8.91346e-10	up	0.813588	0.158769	unchanged	1.53451	0.0605808	unchanged	0.643784	0.596782	unchanged	1.0562	0.0468103	up
XUT1048	2.02127	0.0380975	up	0.543625	0.694567	unchanged	1.89986	0.248935	unchanged	0.711783	NA	NA	0.90987	0.353803	unchanged
XUT1049	2.67275	5.61193e-05	up	0.442165	0.646209	unchanged	1.15267	0.480003	unchanged	-1.59977	NA	NA	-2.10365	0.00632527	down
XUT1050	2.29864	0.0262707	up	0.148976	1	unchanged	3.21017	0.371821	unchanged	1.56385	NA	NA	-1.5322	0.358716	unchanged
XUT1051	3.62718	4.06425e-10	up	1.27142	0.0782177	unchanged	2.54663	0.00752965	up	0.333361	0.842547	unchanged	-0.126427	0.815713	unchanged
XUT1052	4.49392	2.0107e-22	up	2.48166	1.03252e-06	up	3.52084	3.11503e-06	up	-0.977907	0.485915	unchanged	-0.43176	0.411088	unchanged
XUT1053	2.66338	1.22173e-07	up	-0.0340685	0.968089	unchanged	2.28881	0.0167175	up	-1.94363	0.230067	unchanged	-1.38148	0.0678109	unchanged
XUT1054	3.15691	3.38645e-10	up	1.38372	0.0202706	up	3.3413	0.00017839	up	1.53005	0.194319	unchanged	0.770929	0.147018	unchanged
XUT1056	3.75277	1.99151e-23	up	1.78739	2.15066e-05	up	1.31092	0.0886952	unchanged	-1.44586	0.189066	unchanged	-1.59068	3.19099e-07	down
XUT1057	2.96573	1.1277e-23	up	1.79275	1.42974e-08	up	2.43105	1.14984e-05	up	-1.34188	0.109447	unchanged	-1.38295	0.00102925	down
XUT1058	3.12499	6.21043e-22	up	1.50371	3.10421e-05	up	2.97391	1.05537e-06	up	-0.0556445	0.969423	unchanged	-0.22844	0.711077	unchanged
XUT1059	2.26943	0.0122995	up	0.829523	0.493733	unchanged	2.42597	0.11007	unchanged	0.00388821	NA	NA	-0.327763	0.720886	unchanged
XUT1060	1.88347	0.0197281	up	0.703647	0.510656	unchanged	1.88321	0.206575	unchanged	0.317234	NA	NA	0.496872	0.66793	unchanged
XUT1061	3.16973	3.85267e-22	up	0.747638	0.076986	unchanged	0.91831	0.0465406	unchanged	1.4745	0.00182368	up	0.782671	0.00409936	unchanged
XUT1063	2.72074	5.16301e-16	up	1.16011	0.00267691	up	2.62879	1.38206e-06	up	0.954005	0.185946	unchanged	2.2695	3.12898e-21	up
XUT1064	4.66511	1.21798e-28	up	2.0391	1.8455e-05	up	3.15379	0.00022347	up	0.89792	0.491444	unchanged	-0.0802971	0.860505	unchanged
XUT1065	1.65985	0.0106073	up	0.757947	0.355608	unchanged	2.18807	0.0413609	up	-2.39737	0.200454	unchanged	-1.44105	0.324289	unchanged
XUT1068	2.82323	2.4561e-17	up	1.79915	4.9817e-07	up	3.03187	2.72412e-07	up	1.79451	0.00827349	up	1.61841	2.24922e-10	up
XUT1069	2.84981	8.62445e-08	up	1.527	0.0126726	up	1.59685	0.0993059	unchanged	-0.747476	0.640415	unchanged	2.07472	6.4057e-15	up
XUT1070	2.21125	0.000506121	up	0.70603	0.398343	unchanged	2.57422	0.0391567	up	-0.684687	NA	NA	0.39425	0.594354	unchanged
XUT1071	2.47385	1.54949e-07	up	1.10902	0.0471104	up	1.61754	0.080407	unchanged	-0.885788	0.553865	unchanged	-2.9014	1.01783e-08	down
XUT1072	3.46569	1.04361e-05	up	1.46098	0.135268	unchanged	2.5047	0.0893831	unchanged	0.0182142	NA	NA	0.368536	0.684586	unchanged
XUT1073	2.36236	0.0184167	up	0.935456	0.480212	unchanged	0.68513	0.748736	unchanged	-3.73108	NA	NA	-1.94578	0.263115	unchanged
XUT1074	0.364626	0.810719	unchanged	0.516706	1	unchanged	5.94939	0.00334633	up	1.48756	NA	NA	1.53225	0.395872	unchanged
XUT1075	5.73188	0.00571353	up	2.87537	1	unchanged	4.62408	0.163768	unchanged	0	NA	NA	-1.49183	0.538283	unchanged
XUT1076	4.53053	0.0395254	up	3.59346	1	unchanged	4.62968	0.376728	unchanged	0	NA	NA	-2.93355	0.43471	unchanged
XUT1077	4.4452	0.04565	up	3.82749	1	unchanged	5.08347	0.330584	unchanged	0	NA	NA	-2.31249	0.229241	unchanged
XUT1078	0.178652	0.940077	unchanged	0.817846	1	unchanged	4.4366	0.158664	unchanged	1.54829	NA	NA	-1.56233	0.475364	unchanged
XUT1079	3.88236	3.21903e-90	up	2.09644	2.76748e-25	up	2.73048	3.82818e-13	up	0.997921	0.0266701	unchanged	-0.570845	0.03066	unchanged
XUT1080	4.61097	1.24756e-19	up	3.18041	4.75715e-09	up	4.37362	0.000133263	up	1.06216	0.567782	unchanged	-0.156609	0.776169	unchanged
XUT1081	3.60792	6.20953e-06	up	0.933325	0.39835	unchanged	2.044	0.109819	unchanged	-0.293611	NA	NA	-0.409143	0.630768	unchanged
XUT1083	1.69913	0.0163024	up	0.542396	0.570866	unchanged	0.363813	0.791346	unchanged	0.202437	NA	NA	0.608541	0.590916	unchanged
XUT1084	2.40971	2.3299e-10	up	1.02381	0.02169	up	1.99346	0.00254944	up	1.33825	0.0933917	unchanged	1.60741	1.09438e-07	up
XUT1085	2.59733	9.78826e-17	up	1.1337	0.00137611	up	1.95419	0.00716035	up	-0.404952	0.746057	unchanged	-1.69216	6.21836e-05	down
XUT1086	3.67416	4.27524e-109	up	2.44116	6.46153e-47	up	2.50669	6.2341e-15	up	0.367071	0.431494	unchanged	0.183612	0.343654	unchanged
XUT1087	1.33396	6.31048e-05	up	0.216459	0.641548	unchanged	1.27692	0.0288657	up	0.965708	0.177758	unchanged	1.54378	0.00364718	up
XUT1088	1.44824	0.0200694	up	-0.142666	0.88181	unchanged	0.846797	0.505315	unchanged	0.810435	NA	NA	-0.63809	0.359623	unchanged
XUT1089	3.2583	2.5453e-26	up	0.323309	0.46674	unchanged	1.59781	0.0175204	up	-0.0800865	0.951727	unchanged	-1.59465	5.04212e-09	down
XUT1091	2.40031	1.95565e-05	up	0.73973	0.311234	unchanged	1.62337	0.168946	unchanged	-0.175555	NA	NA	-1.62202	0.0139668	down
XUT1092	3.21113	5.58924e-17	up	2.1253	2.37886e-07	up	2.4818	0.00216312	up	0.0177888	0.995832	unchanged	-1.3262	0.000194283	down
XUT1093	2.90918	0.311704	unchanged	0.838361	1	unchanged	1.6312	NA	NA	1.61002	NA	NA	-0.86291	0.603664	unchanged
XUT1094	3.45986	2.42668e-37	up	1.6509	2.4212e-08	up	2.02813	7.98039e-05	up	0.264942	0.761989	unchanged	-0.916664	0.00100091	unchanged
XUT1095	3.31547	2.75296e-11	up	3.16124	7.32736e-10	up	5.68735	1.708e-10	up	1.01436	0.484103	unchanged	0.42335	0.515647	unchanged
XUT1096	3.88115	2.91281e-10	up	0.537394	0.565335	unchanged	2.39682	0.0428272	up	0.649956	0.73898	unchanged	0.171156	0.804773	unchanged
XUT1097	1.95767	0.114573	unchanged	1.08858	1	unchanged	4.62691	0.119724	unchanged	0	NA	NA	0.445664	0.732665	unchanged
XUT1098	2.57642	1.04686e-08	up	0.988924	0.0692057	unchanged	1.43947	0.112637	unchanged	-0.267948	0.864487	unchanged	0.189262	0.796639	unchanged
XUT1099	1.7974	1.72004e-06	up	0.75015	0.0941623	unchanged	1.35994	0.11207	unchanged	0.543597	0.677775	unchanged	-1.44342	6.67691e-07	down
XUT1100	3.85933	0.292139	unchanged	1.25341	1	unchanged	-2.26176	NA	NA	-1.03763	NA	NA	NA	NA	NA
XUT1101	3.3471	5.63173e-64	up	2.22261	1.62834e-27	up	1.97969	3.41138e-05	up	-1.00166	0.134259	unchanged	-1.16894	7.58048e-09	down
XUT1102	0.420843	0.639297	unchanged	-0.248349	0.839636	unchanged	1.84798	0.160694	unchanged	0.438834	NA	NA	-0.048612	0.961182	unchanged
XUT1103	3.91314	3.14099e-22	up	1.55539	0.000891427	up	2.05181	0.0175107	up	0.0333136	0.990278	unchanged	0.346833	0.493785	unchanged
XUT1104	3.28356	1.45958e-21	up	2.08406	1.53689e-08	up	3.28035	4.03324e-05	up	1.91058	0.0478034	up	-0.769911	0.0521856	unchanged
XUT1105	3.52619	1.09314e-13	up	2.61725	2.31201e-07	up	2.66746	0.00043108	up	-0.201779	0.891481	unchanged	-1.02696	0.0257384	down
XUT1106	3.5338	1.86351e-07	up	2.22473	0.0036749	up	1.88226	0.112752	unchanged	-0.359367	NA	NA	-0.74421	0.233675	unchanged
XUT1107	3.07405	3.59606e-10	up	2.15542	5.13537e-05	up	2.44677	0.00211185	up	0.453807	0.736329	unchanged	0.629734	0.0809992	unchanged
XUT1108	3.17141	5.3487e-41	up	2.28519	7.64208e-21	up	1.93516	0.000125316	up	-0.998237	0.16003	unchanged	-0.517642	0.176874	unchanged
XUT1109	2.72252	3.77127e-09	up	0.229226	0.748252	unchanged	1.91425	0.0446922	up	-0.462151	0.780486	unchanged	-1.94384	8.20585e-07	down
XUT1110	2.28952	0.0141369	up	0.00172384	0.999398	unchanged	2.67688	0.0489319	up	-3.78976	NA	NA	-3.22864	1.83578e-06	down
XUT1111	2.23584	0.000957122	up	0.836491	0.339048	unchanged	1.80911	0.125	unchanged	-0.209989	NA	NA	-0.307182	0.706247	unchanged
XUT1112	4.45758	2.9674e-05	up	3.09046	0.0109186	up	3.0095	0.0392791	up	-0.554212	NA	NA	1.3524	0.00815579	up
XUT1113	1.79063	3.80072e-06	up	2.7646	3.55359e-13	up	3.48776	2.80639e-07	up	1.02219	0.284149	unchanged	-2.29942	3.44389e-09	down
XUT1114	3.02781	1.50435e-16	up	2.27643	3.70931e-09	up	2.33256	0.00032087	up	-0.895975	0.386949	unchanged	-0.672199	0.040807	unchanged
XUT1115	2.20638	2.57957e-08	up	0.128579	0.83782	unchanged	1.06549	0.0926072	unchanged	0.395201	0.684009	unchanged	0.861975	0.0107022	unchanged
XUT1116	3.85425	1.44445e-06	up	3.45965	5.33341e-05	up	3.37847	0.00500468	up	0.0400079	0.992697	unchanged	0.190017	0.82979	unchanged
XUT1117	3.50701	2.72537e-07	up	0.948729	0.303414	unchanged	4.50744	0.0017782	up	-2.42302	0.384805	unchanged	-0.405383	0.481273	unchanged
XUT1118	3.71272	4.04223e-08	up	1.21928	0.160574	unchanged	2.88512	0.0202902	up	-0.0272087	0.995832	unchanged	0.32464	0.550726	unchanged
XUT1119	0	1	unchanged	0	1	unchanged	1.62516	NA	NA	0	NA	NA	-1.90378	0.720886	unchanged
XUT1120	NA	NA	NA	NA	NA	NA	NA	NA	NA	NA	NA	NA	NA	NA	NA
XUT1121	2.75437	9.19029e-37	up	2.93701	8.46951e-42	up	3.14454	2.87609e-15	up	0.001915	0.999461	unchanged	-0.890633	2.546e-05	unchanged
XUT1122	2.61748	5.50926e-10	up	2.18167	8.82922e-07	up	2.63593	4.17991e-05	up	-0.956928	0.374111	unchanged	-0.00991733	0.981927	unchanged
XUT1123	1.7742	0.0174935	up	0.872204	0.354032	unchanged	1.22961	0.344008	unchanged	-2.18738	NA	NA	-0.921363	0.140673	unchanged
XUT1124	2.63243	2.39138e-13	up	1.83331	1.84501e-06	up	2.77012	1.79166e-06	up	-1.38257	0.127672	unchanged	-1.90525	1.8115e-09	down
XUT1125	3.25592	9.26712e-29	up	1.32277	6.05723e-05	up	1.63444	0.00877631	up	0.0199392	0.992128	unchanged	-1.48696	0.000369594	down
XUT1126	2.09216	4.96954e-10	up	2.0695	1.9098e-09	up	2.85395	9.03865e-05	up	0.299865	0.81816	unchanged	-1.33153	0.00020049	down
XUT1127	2.67426	0.00078325	up	2.04817	0.0223764	up	2.41199	0.050179	unchanged	-0.342397	0.884162	unchanged	-1.13684	0.039165	down
XUT1128	2.50487	1.11827e-05	up	1.87455	0.00284202	up	2.19787	0.0271089	up	-0.711183	0.690163	unchanged	-0.215248	0.652998	unchanged
XUT1129	3.46568	5.07478e-15	up	1.98696	4.98466e-05	up	2.86251	0.000357845	up	-0.327403	0.832801	unchanged	-0.722378	0.03867	unchanged
XUT1130	3.43601	4.38449e-09	up	1.22281	0.0941623	unchanged	2.00822	0.0807196	unchanged	-1.05605	0.589099	unchanged	-0.943727	0.0144655	unchanged
XUT1131	3.23151	1.92219e-12	up	1.35203	0.0121093	up	1.50761	0.141125	unchanged	-2.10139	0.193456	unchanged	-2.23462	2.34996e-07	down
XUT1132	4.06437	9.8155e-18	up	2.82959	2.275e-08	up	1.34094	0.127406	unchanged	-0.458169	0.756761	unchanged	1.30194	1.12448e-06	up
XUT1133	2.83311	5.20077e-16	up	1.02867	0.0125237	up	0.811339	0.346103	unchanged	-0.0636648	0.972402	unchanged	1.36627	0.000317804	up
XUT1134	3.97732	6.50112e-144	up	2.40234	1.11423e-50	up	2.70881	5.85923e-16	up	0.550188	0.21882	unchanged	-0.643708	0.00210319	unchanged
XUT1135	2.3158	0.0567812	unchanged	-0.769867	0.686094	unchanged	1.83658	0.375353	unchanged	-0.764412	NA	NA	-1.54683	0.187388	unchanged
XUT1136	2.31656	3.0054e-07	up	1.61581	0.00112321	up	1.97126	0.0273502	up	-1.47747	0.296198	unchanged	-2.04718	9.56029e-05	down
XUT1137	2.00781	1.74902e-11	up	1.57391	5.01915e-07	up	2.92018	1.46739e-06	up	0.506786	0.607482	unchanged	-0.30001	0.538445	unchanged
XUT1138	2.35467	7.77696e-45	up	0.12352	0.608279	unchanged	0.945426	0.00732811	unchanged	-0.9348	0.0259864	unchanged	-2.42645	2.99483e-56	down
XUT1139	3.75087	1.03063e-36	up	1.97791	6.8104e-10	up	3.51296	1.75101e-12	up	-1.09407	0.164654	unchanged	-1.70577	1.5e-05	down
XUT1140	3.80601	5.69374e-09	up	2.37388	0.00118994	up	6.4336	0.000265752	up	4.64621	0.0240703	up	-0.817452	0.298196	unchanged
XUT1141	2.42905	7.37426e-19	up	0.736762	0.0240572	unchanged	0.983252	0.0516905	unchanged	1.36483	0.0114434	up	0.851202	0.11967	unchanged
XUT1142	3.99414	2.13062e-19	up	1.46733	0.0063208	up	1.65372	0.016715	up	3.02296	5.39326e-06	up	3.36057	1.898e-10	up
XUT1143	2.67511	0.0496705	up	1.22825	1	unchanged	2.13691	0.483057	unchanged	-0.073851	NA	NA	-1.266	0.235583	unchanged
XUT1144	2.18101	0.000550993	up	0.143909	0.884128	unchanged	0.808303	0.577652	unchanged	-0.10831	NA	NA	0.821842	0.0820168	unchanged
XUT1146	2.41484	0.000271754	up	1.95217	0.00769059	up	1.46511	0.17957	unchanged	-0.188919	0.926655	unchanged	-0.938678	0.0395354	unchanged
XUT1147	3.84942	6.51743e-09	up	1.47119	0.0766653	unchanged	1.19532	0.301512	unchanged	1.60812	0.243288	unchanged	5.57443	2.54598e-15	up
XUT1148	3.13169	9.99125e-16	up	0.947339	0.0493546	unchanged	2.16774	3.72368e-05	up	-0.124521	0.901661	unchanged	-0.886405	0.0477639	unchanged
XUT1149	2.14486	8.96568e-05	up	-0.0451639	0.96105	unchanged	1.27598	0.110188	unchanged	-0.240988	0.858462	unchanged	-0.927479	0.00656314	unchanged
XUT1150	5.1119	1.0624e-98	up	2.90751	2.31359e-30	up	2.86428	9.12161e-12	up	1.02531	0.0493443	up	0.105175	0.773915	unchanged
XUT1153	1.85561	0.00119719	up	-0.169053	0.851511	unchanged	2.26322	0.00171602	up	-1.10798	0.311902	unchanged	-1.67505	0.0116013	down
XUT1154	2.11536	0.00076396	up	-0.254666	0.798429	unchanged	2.04326	0.0752118	unchanged	2.18753	0.0993333	unchanged	1.28004	0.354016	unchanged
XUT1155	3.39127	1.21011e-06	up	3.12949	2.37352e-05	up	2.02322	0.0111359	up	0.126585	0.934813	unchanged	0.00634594	0.992676	unchanged
XUT1156	2.40636	7.0252e-09	up	1.04505	0.032611	up	3.18839	0.000214485	up	0.0413455	0.988247	unchanged	-1.47584	0.000118285	down
XUT1158	2.13902	6.21271e-10	up	1.99969	2.0066e-08	up	2.52021	5.99423e-06	up	-0.696435	0.442281	unchanged	-0.588061	0.0567391	unchanged
XUT1159	3.2414	0.000726651	up	1.1541	0.36544	unchanged	1.79251	0.33125	unchanged	-1.57499	NA	NA	-1.58945	0.0198713	down
XUT1160	2.69599	0.00135813	up	1.34763	0.195826	unchanged	2.57788	0.0786218	unchanged	0.00805634	NA	NA	-0.709985	0.347575	unchanged
XUT1161	1.96866	0.0664002	unchanged	0.832328	0.560732	unchanged	2.99389	0.123555	unchanged	-1.0135	NA	NA	-1.51186	0.231759	unchanged
XUT1162	2.55667	8.742e-32	up	1.57835	5.35492e-12	up	2.14691	2.68574e-07	up	0.751101	0.167111	unchanged	1.56357	2.08966e-09	up
XUT1163	3.59926	5.17862e-13	up	1.91231	0.000715216	up	1.81003	0.0131384	up	1.33491	0.133808	unchanged	-0.156465	0.721159	unchanged
XUT1164	0	1	unchanged	0	1	unchanged	NA	NA	NA	NA	NA	NA	NA	NA	NA
XUT1165	1.75037	0.0168721	up	1.43545	0.0845394	unchanged	2.86921	0.0195805	up	-0.342982	0.885014	unchanged	-0.611414	0.6187	unchanged
XUT1166	2.96465	3.58655e-12	up	1.58937	0.000890495	up	2.32164	0.00223437	up	-0.072899	0.965571	unchanged	-0.985506	0.000934886	unchanged
XUT1167	7.02036	8.26766e-06	up	3.42164	0.0722563	unchanged	2.50557	0.145411	unchanged	0.0151477	NA	NA	-0.0107115	0.995087	unchanged
XUT1168	3.86497	2.34304e-18	up	1.18874	0.0292608	up	1.12027	0.210328	unchanged	-0.409077	0.785383	unchanged	0.135479	0.934739	unchanged
XUT1169	2.23726	0.00125725	up	2.06296	0.00608092	up	1.60099	0.111252	unchanged	-0.949291	0.567963	unchanged	0.385231	0.506184	unchanged
XUT1170	2.56918	1.64492e-15	up	1.83994	6.82363e-08	up	3.33326	1.62086e-09	up	1.20098	0.0904778	unchanged	0.753104	0.000694281	unchanged
XUT1171	2.77187	3.09245e-05	up	1.63821	0.0340028	up	2.20563	0.0663726	unchanged	0.00302933	NA	NA	-0.325284	0.568717	unchanged
XUT1172	4.37	9.5792e-06	up	1.89943	0.122475	unchanged	2.18439	0.144086	unchanged	-0.986664	NA	NA	-1.32935	0.0512245	unchanged
XUT1173	2.84355	5.08589e-13	up	0.984358	0.0377893	unchanged	2.23595	0.00171756	up	-0.83475	0.483281	unchanged	-0.194722	0.56708	unchanged
XUT1174	6.14622	0.000827959	up	4.06834	1	unchanged	2.94744	0.301095	unchanged	-1.46872	NA	NA	-0.715373	0.583588	unchanged
XUT1176	2.99866	1.71631e-13	up	1.82194	4.38318e-05	up	1.84535	0.0193678	up	0.282762	0.83446	unchanged	-0.803255	0.107593	unchanged
XUT1177	3.24631	8.58791e-31	up	2.01922	1.19704e-11	up	2.21228	1.29603e-05	up	0.439004	0.581534	unchanged	0.344443	0.181892	unchanged
XUT1178	2.22166	0.00179592	up	0.7866	0.397905	unchanged	2.32133	0.0546329	unchanged	-1.61015	NA	NA	-0.272067	0.748538	unchanged
XUT1179	3.28569	3.76677e-06	up	1.5443	0.0719566	unchanged	2.70463	0.0557659	unchanged	1.24209	NA	NA	-0.119749	0.909869	unchanged
XUT1180	3.61788	0.0123664	up	1.99	1	unchanged	3.37269	0.14517	unchanged	1.03731	NA	NA	-1.13576	0.479752	unchanged
XUT1181	4.16984	2.75113e-48	up	2.03144	5.40282e-11	up	2.44358	3.49903e-05	up	0.38276	0.697897	unchanged	-0.864213	0.0298244	unchanged
XUT1182	3.81518	9.14979e-06	up	2.83807	0.00306027	up	2.6066	0.102772	unchanged	1.56739	NA	NA	4.27346	4.20404e-54	up
XUT1185	3.29229	2.12477e-07	up	3.84656	2.7936e-09	up	3.09194	0.000340238	up	0.412079	0.787656	unchanged	-0.767749	0.0721614	unchanged
XUT1186	2.53936	3.30828e-06	up	1.65445	0.00696616	up	2.01968	0.0271554	up	-0.31846	0.847492	unchanged	-1.8892	0.000113046	down
XUT1187	4.74277	1.41606e-09	up	3.88109	3.7775e-06	up	2.32348	5.93297e-06	up	-2.30103	0.00316793	down	1.091	0.257803	unchanged
XUT1188	4.54186	7.3681e-13	up	3.47737	2.59884e-07	up	2.47555	3.4717e-09	up	-1.42539	0.0108999	down	0.620676	0.465326	unchanged
XUT1189	3.54652	0.000558848	up	1.87645	0.133515	unchanged	4.43351	0.123526	unchanged	1.41757	NA	NA	1.50468	0.354829	unchanged
XUT1190	3.17775	0.00112288	up	0.315743	0.844076	unchanged	1.10108	0.369768	unchanged	-3.5076	NA	NA	-0.0762775	0.937619	unchanged
XUT1191	3.72383	3.32994e-58	up	2.08687	1.34764e-17	up	3.12244	5.14528e-12	up	-0.188462	0.823916	unchanged	-1.23274	2.26706e-07	down
XUT1192	3.05418	1.11103e-06	up	1.51433	0.0411271	up	2.16328	0.190742	unchanged	-0.0384133	NA	NA	-1.27166	0.191659	unchanged
XUT1193	2.99671	8.04085e-11	up	1.84391	0.000296699	up	1.36641	0.0977719	unchanged	-1.12	0.361223	unchanged	-0.371098	0.469544	unchanged
XUT1194	1.54805	0.0674121	unchanged	0.631062	0.57365	unchanged	2.03527	0.162055	unchanged	-0.377642	NA	NA	1.21652	0.237813	unchanged
XUT1195	2.00954	5.86139e-16	up	0.326497	0.318175	unchanged	1.94847	1.59632e-05	up	-0.534227	0.436633	unchanged	-0.721874	0.0573653	unchanged
XUT1196	3.76517	1.44426e-09	up	2.34832	0.000699426	up	2.57718	0.0688538	unchanged	-1.23719	NA	NA	-0.978348	0.352378	unchanged
XUT1197	3.07616	2.99017e-05	up	2.17632	0.00857679	up	4.36862	0.0265022	up	1.02776	NA	NA	0.618995	0.662422	unchanged
XUT1198	1.22566	0.117952	unchanged	-0.0867207	0.945121	unchanged	0.766674	0.570635	unchanged	-0.984109	NA	NA	0.0323501	0.976098	unchanged
XUT1199	4.10164	1.43694e-45	up	2.42705	2.59488e-15	up	2.12608	9.86195e-07	up	1.831	7.57541e-05	up	2.00957	7.07e-20	up
XUT1200	2.42272	0.00219929	up	1.48822	0.111983	unchanged	3.4462	0.0693735	unchanged	-1.00505	NA	NA	0.151836	0.876893	unchanged
XUT1201	2.03064	1.20511e-06	up	1.10614	0.0208722	up	1.13418	0.11513	unchanged	-0.823459	0.435091	unchanged	-0.949657	0.00290572	unchanged
XUT1202	3.18132	4.05358e-12	up	1.09917	0.0495303	up	1.75367	0.0398246	up	-1.08648	0.4091	unchanged	-1.43574	0.0277693	down
XUT1203	3.58033	1.63801e-12	up	1.37756	0.0240977	up	1.77822	0.0668965	unchanged	1.25278	0.322153	unchanged	1.80418	4.50905e-05	up
XUT1204	1.72262	0.120292	unchanged	0.0205176	1	unchanged	0.843179	0.662627	unchanged	-1.43386	NA	NA	-2.28978	0.0489547	down
XUT1205	2.74823	3.41832e-06	up	1.81342	0.006381	up	3.21224	0.000339632	up	-0.960631	0.567437	unchanged	-1.30203	0.0186085	down
XUT1206	3.04091	3.03505e-06	up	2.29386	0.00135187	up	1.6227	0.0784889	unchanged	-1.44151	0.319755	unchanged	-0.192947	0.753387	unchanged
XUT1207	2.0716	1.28651e-13	up	0.962176	0.00224023	unchanged	2.49633	3.09127e-05	up	-0.302344	0.777812	unchanged	-1.01227	0.00500266	down
XUT1208	1.55379	0.0174086	up	0.431842	0.62971	unchanged	1.76164	0.0790346	unchanged	-0.149886	0.937054	unchanged	-1.28189	0.0706839	unchanged
XUT1209	1.77348	0.00176535	up	0.730206	0.306797	unchanged	2.73144	0.0246429	up	0.293464	NA	NA	0.119602	0.899697	unchanged
XUT1210	3.01216	1.45676e-22	up	1.04967	0.00357717	up	2.48915	1.72571e-05	up	1.86281	0.00394319	up	0.708954	0.0382954	unchanged
XUT1211	2.32668	0.00122373	up	1.65711	0.043496	up	1.66586	0.125869	unchanged	-1.10699	0.538389	unchanged	-1.0411	0.0792848	unchanged
XUT1212	3.01387	0.000191231	up	0.195585	0.882696	unchanged	1.79037	0.167697	unchanged	-0.243892	NA	NA	0.294321	0.631862	unchanged
XUT1213	3.63331	1.12522e-28	up	1.31326	0.000527072	up	3.27265	1.85373e-05	up	-0.193804	0.898842	unchanged	-1.60611	2.01792e-05	down
XUT1214	3.03512	2.01085e-12	up	1.34947	0.00694636	up	2.663	0.00108082	up	0.186342	0.904463	unchanged	3.82923	4.12906e-17	up
XUT1215	2.91877	9.39748e-08	up	1.68201	0.00699762	up	3.59518	0.000520923	up	1.69572	0.218655	unchanged	0.921028	0.0722817	unchanged
XUT1216	4.97131	5.29137e-18	up	3.60986	3.65749e-09	up	3.04436	0.000118137	up	0.296017	0.837693	unchanged	1.84798	0.000407312	up
XUT1219	2.52928	2.22486e-17	up	1.33958	4.53027e-05	up	1.18013	0.0284217	up	1.49164	0.0096058	up	1.94623	5.02523e-12	up
XUT1221	2.19362	1.27782e-05	up	0.550674	0.411123	unchanged	1.31222	0.13595	unchanged	0.645763	0.616383	unchanged	0.586478	0.125956	unchanged
XUT1222	3.27118	3.67288e-13	up	1.49551	0.00405143	up	1.78305	0.0799122	unchanged	-0.739074	0.671136	unchanged	0.898536	0.0870263	unchanged
XUT1223	0.973506	0.304996	unchanged	-0.410871	0.763673	unchanged	3.5847	0.00870754	up	-0.588217	0.832801	unchanged	0.205477	0.811219	unchanged
XUT1224	2.89171	7.81604e-11	up	0.28238	0.674121	unchanged	2.44605	0.000442255	up	0.656525	0.533732	unchanged	0.382138	0.713173	unchanged
XUT1225	2.28563	1.56757e-22	up	0.975406	0.00017945	unchanged	1.29322	0.0020884	up	0.222315	0.743478	unchanged	-1.17796	1.07523e-08	down
XUT1227	3.95472	3.43493e-05	up	3.28078	0.00175752	up	3.23489	0.0378458	up	1.23677	NA	NA	1.3726	0.0267015	up
XUT1228	4.56915	5.41382e-34	up	1.96959	3.27027e-06	up	3.36026	2.62656e-05	up	-1.28914	0.379997	unchanged	-0.819044	0.166073	unchanged
XUT1229	3.47327	3.75785e-11	up	1.8219	0.00246646	up	6.411	6.14078e-05	up	2.78743	0.188056	unchanged	0.694985	0.225546	unchanged
XUT1230	1.15763	0.0999595	unchanged	1.18543	0.136474	unchanged	1.48795	0.167014	unchanged	-0.0212172	0.995832	unchanged	-1.0047	0.0089446	down
XUT1231	1.38644	0.0303291	up	1.61623	0.0180515	up	3.00329	0.000388939	up	-2.45778	0.13758	unchanged	-2.93957	0.00239961	down
XUT1232	3.899	1.03681e-07	up	1.22333	0.202466	unchanged	2.30594	0.0792457	unchanged	-0.820096	NA	NA	-2.10677	0.0679444	unchanged
XUT1233	3.38507	2.07118e-07	up	2.43263	0.000703951	up	4.01434	0.00113578	up	0.0661442	0.986728	unchanged	-0.543838	0.546973	unchanged
XUT1234	3.39397	5.85758e-15	up	1.33743	0.00914022	up	2.79145	0.00123819	up	-1.05413	0.486749	unchanged	-2.44821	5.01948e-06	down
XUT1235	2.64146	3.02845e-05	up	0.0358636	0.972315	unchanged	2.58874	0.164237	unchanged	0.51031	NA	NA	0.625709	0.217572	unchanged
XUT1236	2.00216	1.37559e-11	up	0.0446199	0.927101	unchanged	1.2635	0.0765322	unchanged	0.049681	0.975592	unchanged	0.369866	0.297492	unchanged
XUT1237	3.45922	0.0301758	up	0.822755	1	unchanged	1.62887	0.599874	unchanged	2.46436	NA	NA	-2.39591	0.595759	unchanged
XUT1238	2.37941	1.47975e-10	up	1.90002	1.14789e-06	up	3.24977	1.36732e-08	up	0.726455	0.395348	unchanged	-0.550934	0.12154	unchanged
XUT1240	1.68549	7.07764e-15	up	1.71561	5.96427e-15	up	1.09002	0.0124698	up	-0.331278	0.617	unchanged	0.218665	0.564833	unchanged
XUT1241	2.37518	0.0136141	up	0.128483	0.935747	unchanged	0.154844	0.92997	unchanged	-1.04985	NA	NA	-0.928299	0.306997	unchanged
XUT1242	3.3307	1.50636e-56	up	1.66762	8.55014e-14	up	2.14781	1.07353e-08	up	0.40634	0.460946	unchanged	-0.00611989	0.981588	unchanged
XUT1243	2.55937	9.8227e-46	up	2.01175	4.92214e-28	up	3.11365	6.33747e-21	up	-1.28397	0.00390681	down	-0.384176	0.191106	unchanged
XUT1244	3.87577	0.0382157	up	2.41757	1	unchanged	4.62819	0.0532799	unchanged	3.31655	NA	NA	2.20211	0.137089	unchanged
XUT1245	3.99136	2.91265e-25	up	0.648483	0.218214	unchanged	3.25262	3.3016e-05	up	-1.41792	0.314055	unchanged	0.398548	0.378425	unchanged
XUT1246	2.55619	0.00151488	up	0.460057	0.701367	unchanged	3.41695	0.0027293	up	-3.94692	0.0749333	unchanged	-1.30045	0.180526	unchanged
XUT1247	0.794968	0.353766	unchanged	0.0536209	0.966948	unchanged	0.790939	0.557708	unchanged	-1.18266	NA	NA	-3.03261	0.0931966	unchanged
XUT1248	3.2949	1.92383e-06	up	1.0738	0.232586	unchanged	2.61492	0.0111057	up	0.360319	0.842033	unchanged	-0.366667	0.711077	unchanged
XUT1249	2.64984	0.00117219	up	1.3014	0.197963	unchanged	1.32292	0.335292	unchanged	-0.243435	NA	NA	1.04047	0.170394	unchanged
XUT1250	2.72762	0.000153947	up	1.33632	0.126699	unchanged	2.61934	0.0845694	unchanged	-0.625519	NA	NA	1.09716	0.139752	unchanged
XUT1251	3.4824	1.33483e-10	up	2.34404	7.81193e-05	up	2.59123	0.00384091	up	-0.720648	0.651589	unchanged	-1.1402	0.00787159	down
XUT1252	4.12091	1.61299e-125	up	2.20461	1.63718e-34	up	2.51723	5.98841e-15	up	0.510378	0.237648	unchanged	0.172864	0.363856	unchanged
XUT1253	2.68418	9.58475e-30	up	2.44764	1.68698e-24	up	2.9975	2.32136e-11	up	-0.585171	0.417242	unchanged	-0.660775	0.0873433	unchanged
XUT1254	2.18377	0.000378359	up	0.311518	0.733343	unchanged	1.16866	0.266842	unchanged	0.0293208	0.993178	unchanged	-0.335625	0.496322	unchanged
XUT1255	3.89446	1.19069e-05	up	2.54884	0.0120939	up	3.35532	0.0634916	unchanged	-0.0745605	NA	NA	-1.4097	0.136102	unchanged
XUT1256	2.16359	3.36909e-05	up	0.10124	0.905536	unchanged	1.25237	0.146404	unchanged	-0.416312	0.771651	unchanged	1.47279	3.44121e-05	up
XUT1257	2.95344	1.66643e-05	up	1.74059	0.0285854	up	7.05088	5.94643e-05	up	3.01751	0.221531	unchanged	-0.735029	0.227012	unchanged
XUT1258	1.7472	3.5875e-05	up	0.942702	0.0543177	unchanged	2.39006	0.00221171	up	0.497223	0.700279	unchanged	0.512053	0.474672	unchanged
XUT1259	4.4667	0.0180829	up	3.92449	1	unchanged	1.21094	0.709089	unchanged	1.05066	NA	NA	-0.696982	0.742436	unchanged
XUT1260	2.7638	0.000498743	up	1.86429	0.0413649	up	2.83222	0.154778	unchanged	-0.882145	NA	NA	-0.884093	0.3843	unchanged
XUT1261	1.76218	1.31367e-11	up	0.658895	0.0300469	unchanged	0.364146	0.557788	unchanged	-1.18067	0.131112	unchanged	-0.951892	1.16778e-05	unchanged
XUT1262	2.6305	1.43455e-35	up	1.43931	1.34058e-10	up	1.69302	0.000116463	up	-0.846778	0.167491	unchanged	-0.0231673	0.954833	unchanged
XUT1264	1.82	4.65768e-05	up	0.154061	0.821648	unchanged	1.26049	0.111067	unchanged	-0.642336	0.609319	unchanged	0.112131	0.853512	unchanged
XUT1265	4.52469	1.85202e-07	up	2.30494	0.0247214	up	4.59389	0.0268094	up	0.941058	NA	NA	-1.8418	0.0902538	unchanged
XUT1266	4.04946	3.8526e-46	up	1.32249	5.37084e-05	up	2.43195	5.33047e-06	up	-0.946912	0.250672	unchanged	-0.616335	0.132264	unchanged
XUT1267	3.29229	1.37019e-08	up	0.781487	0.322877	unchanged	2.59911	0.0185549	up	0.286856	0.887012	unchanged	-0.476709	0.482656	unchanged
XUT1268	2.66044	0.0016394	up	0.539832	0.660664	unchanged	3.40184	0.0107341	up	-3.4551	NA	NA	-0.376149	0.72116	unchanged
XUT1269	1.71152	1.93831e-07	up	0.177548	0.711689	unchanged	1.00588	0.072296	unchanged	0.744285	0.295791	unchanged	-0.0969795	0.764059	unchanged
XUT1270	3.36024	4.65986e-104	up	1.60707	5.32797e-23	up	2.18684	5.0445e-11	up	0.372407	0.43741	unchanged	-0.504749	0.00718961	unchanged
XUT1271	2.7445	0.00314144	up	0.241678	0.86922	unchanged	2.47259	0.3328	unchanged	0.987609	NA	NA	-0.439663	0.679178	unchanged
XUT1272	0.427123	0.320408	unchanged	0.970125	0.0209987	unchanged	2.36793	0.000152445	up	2.29883	0.000575708	up	3.53389	9.14652e-10	up
XUT1273	1.70072	0.00994983	up	1.24553	0.097448	unchanged	2.16174	0.0117212	up	1.85423	0.0631036	unchanged	2.66631	2.91082e-06	up
XUT1274	2.12804	2.28778e-05	up	0.900943	0.140577	unchanged	3.20849	0.000177948	up	0.694223	0.616885	unchanged	3.0908	3.13318e-12	up
XUT1275	2.48371	6.33672e-05	up	0.927984	0.242477	unchanged	1.61691	0.106542	unchanged	1.47382	0.232577	unchanged	3.43422	4.65408e-11	up
XUT1276	2.23974	2.75116e-14	up	1.00102	0.00275784	up	1.67531	0.00137697	up	-0.319103	0.721438	unchanged	0.324173	0.388656	unchanged
XUT1277	4.95439	5.90182e-20	up	2.90236	9.94499e-07	up	3.74151	0.000178878	up	2.02192	0.108493	unchanged	1.1143	0.00373425	up
XUT1278	2.12935	0.00571195	up	1.41956	0.116094	unchanged	2.43174	0.112175	unchanged	-0.904027	NA	NA	-3.80331	0.0395756	down
XUT1279	4.73507	1.51426e-11	up	0.731271	0.482715	unchanged	2.96914	0.0891409	unchanged	-3.03405	NA	NA	-2.0554	0.0889355	unchanged
XUT1280	3.14849	0.630817	unchanged	0	1	unchanged	NA	NA	NA	NA	NA	NA	NA	NA	NA
XUT1281	4.09632	1.70029e-96	up	2.20918	8.34458e-27	up	2.96486	3.0627e-14	up	0.792626	0.117373	unchanged	0.0473089	0.866277	unchanged
XUT1282	1.79942	0.0669334	unchanged	0.908826	0.472118	unchanged	0.642346	0.690805	unchanged	-4.42801	NA	NA	-1.54118	0.162412	unchanged
XUT1283	2.64011	1.20319e-34	up	2.16137	5.46377e-23	up	2.58503	9.08668e-13	up	0.290121	0.614242	unchanged	0.908573	2.21008e-05	unchanged
XUT1284	2.67615	4.27459e-08	up	0.946577	0.116699	unchanged	3.24201	0.000805275	up	0.0111235	0.997966	unchanged	-1.60039	0.000467408	down
XUT1286	3.1878	0.00030754	up	1.48782	0.175256	unchanged	5.53203	0.0152124	up	0	NA	NA	1.10893	0.0979393	unchanged
XUT1287	3.15339	8.726e-09	up	1.52012	0.017989	up	2.70758	0.00684243	up	-0.820963	0.658648	unchanged	0.432554	0.531028	unchanged
XUT1288	3.29534	2.4193e-13	up	2.4827	2.09143e-07	up	3.25802	2.44844e-06	up	0.212744	0.872606	unchanged	-0.987427	0.00106639	unchanged
XUT1289	2.25177	0.00225771	up	1.13688	0.210082	unchanged	2.8951	0.0137657	up	-0.0525824	0.988826	unchanged	-1.82861	0.0334509	down
XUT1290	1.32705	0.0997271	unchanged	0.782133	0.43876	unchanged	2.78676	0.0478188	up	1.48571	NA	NA	-1.19825	0.280954	unchanged
XUT1291	4.46943	2.05559e-06	up	2.92177	0.0063208	up	1.98369	0.244225	unchanged	0.795404	NA	NA	-0.426604	0.572527	unchanged
XUT1292	4.2807	4.99489e-95	up	3.00454	1.48082e-45	up	3.20655	1.52407e-16	up	0.860468	0.0817325	unchanged	0.45564	0.0424109	unchanged
XUT1293	3.86697	0.00606008	up	1.38076	1	unchanged	2.56186	0.178499	unchanged	-0.955174	NA	NA	0.753592	0.660682	unchanged
XUT1294	2.46758	2.10007e-06	up	1.4344	0.0157781	up	2.56151	0.0082679	up	-0.232765	0.90277	unchanged	-2.00608	0.000648381	down
XUT1295	3.36393	0.000334842	up	0.840711	0.526357	unchanged	2.16114	0.227736	unchanged	-3.03425	NA	NA	-1.00738	0.12336	unchanged
XUT1296	3.39552	9.11582e-09	up	1.1845	0.110132	unchanged	1.70488	0.0919261	unchanged	-0.735879	0.668291	unchanged	-0.760289	0.188119	unchanged
XUT1297	2.64896	0.000840543	up	0.636504	0.571353	unchanged	3.74517	0.0133511	up	1.05361	NA	NA	0.119876	0.892009	unchanged
XUT1299	2.3191	0.000930772	up	0.959363	0.280446	unchanged	2.25138	0.0474504	up	-3.02168	0.18238	unchanged	-2.13959	0.00124857	down
XUT1300	2.25346	0.000160468	up	1.04196	0.15142	unchanged	2.24171	0.0629553	unchanged	-0.569705	NA	NA	1.09234	0.015299	up
XUT1301	3.48224	0.000179313	up	1.54768	0.183957	unchanged	2.33494	0.0763985	unchanged	-0.737652	NA	NA	-1.15154	0.156385	unchanged
XUT1302	2.23341	0.000269323	up	1.01626	0.176864	unchanged	2.8232	0.00534077	up	-1.45762	0.41728	unchanged	-2.17665	0.00314656	down
XUT1303	2.85146	8.33891e-09	up	0.64946	0.329189	unchanged	1.94236	0.0680856	unchanged	-0.838597	0.643065	unchanged	-0.332746	0.591442	unchanged
XUT1304	3.91862	1.80228e-99	up	2.43876	3.49324e-37	up	2.9669	1.24928e-15	up	-0.320525	0.605211	unchanged	-0.723236	0.000746333	unchanged
XUT1305	2.47419	0.106226	unchanged	2.70641	1	unchanged	3.21326	0.213417	unchanged	0	NA	NA	2.18021	0.00786491	up
XUT1306	3.9822	3.39382e-07	up	1.71946	0.0721365	unchanged	2.82657	0.0689237	unchanged	-3.42621	NA	NA	-1.3567	0.273331	unchanged
XUT1307	2.62428	7.33314e-08	up	0.976374	0.101649	unchanged	2.288	0.00384174	up	-2.62734	0.0493762	down	-1.51201	2.08304e-06	down
XUT1308	3.13511	5.44043e-56	up	2.10666	1.04293e-24	up	3.12604	6.58252e-16	up	-0.426611	0.494131	unchanged	-1.67205	6.27273e-21	down
XUT1310	1.21281	0.0657128	unchanged	0.136083	0.891683	unchanged	0.324128	0.809168	unchanged	-0.908888	NA	NA	0.488887	0.546587	unchanged
XUT1311	3.26933	5.95667e-63	up	2.87806	3.31084e-48	up	2.49526	5.25464e-12	up	0.00506449	0.997569	unchanged	-0.123351	0.815074	unchanged
XUT1312	0.941529	0.509791	unchanged	0.0933622	1	unchanged	5.08385	0.0593387	unchanged	0	NA	NA	-1.91476	0.10029	unchanged
XUT1313	2.41155	0.0638968	unchanged	1.69721	1	unchanged	2.82435	0.150364	unchanged	-1.00478	NA	NA	-1.58318	0.189106	unchanged
XUT1314	2.11275	0.000178318	up	0.981245	0.151769	unchanged	3.08494	0.00149374	up	0.167473	0.932495	unchanged	-2.14531	0.000173093	down
XUT1315	3.84388	3.93691e-72	up	1.27716	8.5889e-08	up	2.24711	5.52215e-08	up	0.148076	0.838487	unchanged	0.0689725	0.81839	unchanged
XUT1316	3.22428	1.62828e-17	up	1.4389	0.000848402	up	1.84998	0.00305807	up	0.727301	0.407879	unchanged	0.524674	0.0528279	unchanged
XUT1317	2.0392	0.00134724	up	1.09731	0.151279	unchanged	3.0676	0.000382622	up	-0.425301	0.800833	unchanged	-0.0867575	0.892009	unchanged
XUT1318	2.67459	0.00618863	up	0.932978	0.4773	unchanged	2.95238	0.17469	unchanged	-0.0296021	NA	NA	-2.68785	0.149017	unchanged
XUT1319	5.02594	2.4807e-12	up	3.63373	2.79839e-06	up	2.73264	0.0220562	up	0.648892	0.743811	unchanged	-0.0235489	0.966577	unchanged
XUT1320	4.9418	2.14245e-06	up	2.56673	0.0391539	up	2.64512	0.130789	unchanged	0.0983157	NA	NA	1.65882	0.00603267	up
XUT1321	2.27258	0.0129286	up	0.327987	0.813971	unchanged	1.57332	0.417146	unchanged	-1.55289	NA	NA	-1.45259	0.206153	unchanged
XUT1323	2.85459	0.000569056	up	1.08358	0.316024	unchanged	2.07426	0.0546396	unchanged	-0.0943069	0.968201	unchanged	0.566707	0.455878	unchanged
XUT1325	2.78893	5.37016e-09	up	1.46139	0.00751168	up	1.66165	0.016715	up	-0.0185641	0.994154	unchanged	-0.248561	0.461927	unchanged
XUT1326	5.11665	9.91669e-15	up	3.28693	5.34641e-06	up	3.7585	0.00211006	up	0.41832	0.856188	unchanged	0.0348365	0.953668	unchanged
XUT1327	4.29006	0.00121091	up	3.32689	0.0279199	up	2.74231	0.256458	unchanged	-0.0455156	NA	NA	-0.350958	0.825543	unchanged
XUT1328	2.0058	0.345246	unchanged	1.37748	1	unchanged	1.18147	0.714739	unchanged	-2.42808	NA	NA	-1.61382	0.333763	unchanged
XUT1329	NA	1	unchanged	NA	1	unchanged	NA	NA	NA	NA	NA	NA	NA	NA	NA
XUT1330	2.72533	1.94473e-07	up	1.44133	0.0172773	up	1.62544	0.0373468	up	0.36412	0.774125	unchanged	-0.334759	0.388645	unchanged
XUT1332	3.7914	6.79663e-30	up	2.62397	6.12073e-14	up	2.48806	3.41024e-05	up	0.608213	0.499932	unchanged	0.522049	0.0916635	unchanged
XUT1333	2.93132	3.8946e-06	up	0.733468	0.391356	unchanged	1.96318	0.156028	unchanged	0.102075	NA	NA	0.587731	0.388414	unchanged
XUT1334	2.82782	0.0239156	up	1.73943	1	unchanged	2.64437	0.167254	unchanged	-1.0123	NA	NA	2.01099	0.0321409	up
XUT1335	2.7525	0.000692131	up	-0.166476	0.904477	unchanged	0.506238	0.763082	unchanged	0.560781	NA	NA	0.664113	0.337758	unchanged
XUT1336	2.21504	0.000190441	up	-0.295661	0.751291	unchanged	1.67906	0.0879025	unchanged	0.456278	0.774939	unchanged	0.520885	0.319234	unchanged
XUT1337	2.84336	3.2429e-17	up	0.0430909	0.942796	unchanged	1.2972	0.0243879	up	1.07141	0.119453	unchanged	1.04934	0.00372351	up
XUT1338	2.06436	3.33617e-08	up	0.951016	0.0287632	unchanged	3.24383	3.07488e-08	up	-0.658627	0.523273	unchanged	-1.31818	0.0241253	down
XUT1339	2.45774	4.03662e-08	up	0.607924	0.300921	unchanged	3.8618	0.000144363	up	0.740267	0.667973	unchanged	-0.717579	0.176419	unchanged
XUT1340	3.20433	1.34722e-32	up	2.16326	1.57046e-14	up	2.59844	9.33186e-09	up	0.373892	0.608535	unchanged	0.909775	8.29377e-05	unchanged
XUT1341	2.98273	1.18679e-38	up	1.77011	2.72692e-13	up	2.33241	3.18779e-09	up	2.17518	8.69458e-08	up	1.46655	1.57601e-13	up
XUT1342	3.47491	5.6111e-28	up	2.01396	3.53646e-09	up	2.53337	4.90321e-06	up	-0.0536175	0.966137	unchanged	-0.295869	0.266549	unchanged
XUT1343	4.02884	2.49846e-153	up	2.26517	5.07223e-47	up	2.3982	4.42153e-16	up	0.516558	0.172286	unchanged	0.105389	0.565568	unchanged
XUT1344	2.67622	0.000227356	up	0.613783	0.544254	unchanged	2.1872	0.0252327	up	-5.03764	0.0111434	down	-1.32704	0.0186992	down
XUT1345	2.50929	5.09369e-05	up	1.2884	0.0804976	unchanged	3.7906	0.0148794	up	-2.46429	NA	NA	-0.527348	0.343468	unchanged
XUT1346	2.48663	0.0012236	up	0.446385	0.69093	unchanged	3.31866	0.0539593	unchanged	-0.0174848	NA	NA	-1.66903	0.0308118	down
XUT1347	3.81308	0.00834987	up	1.8087	1	unchanged	0.739881	0.658737	unchanged	-2.56637	NA	NA	-0.513542	0.470221	unchanged
XUT1348	3.0622	8.56322e-36	up	1.46257	4.03157e-08	up	1.83727	3.96441e-05	up	0.31596	0.659915	unchanged	-0.271144	0.246112	unchanged
XUT1349	3.14774	0.0186581	up	0.813101	1	unchanged	4.2136	0.127586	unchanged	1.41938	NA	NA	0.150232	0.940565	unchanged
XUT1350	1.91051	0.0153104	up	1.17242	0.218021	unchanged	1.31819	0.362628	unchanged	-2.78108	NA	NA	1.77176	1.57081e-05	up
XUT1352	3.19733	2.87687e-11	up	3.12526	2.47401e-10	up	2.51716	0.0011711	up	0.54471	0.669122	unchanged	1.05929	0.00438886	up
XUT1353	4.19119	3.66583e-39	up	2.52335	1.096e-13	up	3.29054	2.73895e-08	up	1.44898	0.0476753	up	0.917544	0.000199966	unchanged
XUT1354	4.80253	9.26356e-27	up	2.68459	3.89903e-08	up	2.54661	0.00783152	up	-2.02138	0.264626	unchanged	-1.74924	3.72417e-06	down
XUT1355	3.84897	5.48948e-15	up	2.14733	8.99832e-05	up	2.1096	0.0283366	up	1.59316	0.181036	unchanged	0.961187	0.0796391	unchanged
XUT1356	2.42261	0.0020004	up	0.681729	0.526547	unchanged	1.20924	0.378883	unchanged	-0.336106	NA	NA	1.95367	0.0406141	up
XUT1357	3.53059	1.96482e-06	up	1.87018	0.0329067	up	1.50553	0.220548	unchanged	0.620255	NA	NA	0.891312	0.169333	unchanged
XUT1358	2.42171	1.10829e-06	up	0.721675	0.260109	unchanged	1.99301	0.0405002	up	0.763755	0.601065	unchanged	0.226749	0.715538	unchanged
XUT1359	4.16686	7.14782e-39	up	1.53835	2.72645e-05	up	2.59806	1.89033e-06	up	1.34467	0.0408807	up	1.32992	7.55129e-07	up
XUT1360	2.18754	5.16014e-06	up	0.774397	0.197379	unchanged	1.96699	0.0285462	up	-0.141242	0.935249	unchanged	-0.635061	0.125444	unchanged
XUT1361	6.17654	7.89242e-14	up	5.17987	2.84814e-09	up	1.53873	4.60749e-05	up	-2.48214	6.81472e-07	down	1.80091	2.49244e-06	up
XUT1362	3.22077	1.36153e-05	up	2.7077	0.00075441	up	2.83064	0.0128871	up	0.811682	0.661727	unchanged	2.31857	2.51846e-07	up
XUT1363	3.95447	6.40608e-65	up	2.12304	5.20128e-18	up	3.10587	8.52982e-11	up	-1.13287	0.124607	unchanged	-1.2673	3.4688e-08	down
XUT1364	4.63571	3.79491e-42	up	1.96928	2.15728e-07	up	1.89488	0.0161608	up	-0.671805	0.60174	unchanged	-0.93835	0.0250836	unchanged
XUT1365	3.62322	6.61921e-15	up	1.8283	0.000519618	up	3.22003	0.000291476	up	-0.692568	0.683539	unchanged	-0.942762	0.153533	unchanged
XUT1366	2.89851	4.58386e-07	up	1.69234	0.00994683	up	3.32351	0.0230518	up	1.96005	0.316956	unchanged	3.56008	1.25831e-26	up
XUT1367	0.798677	0.0482236	unchanged	0.00867054	0.988453	unchanged	1.38554	0.0476301	up	-1.76413	0.067218	unchanged	-0.16571	0.842656	unchanged
XUT1368	1.91493	0.000639322	up	-0.0224791	0.979479	unchanged	1.12152	0.251939	unchanged	0.3156	0.84268	unchanged	-0.496079	0.484846	unchanged
XUT1369	3.53499	3.35702e-07	up	1.32145	0.127195	unchanged	1.89546	0.163624	unchanged	-2.57366	NA	NA	-1.90153	6.15405e-05	down
XUT1371	3.19488	1.48187e-08	up	1.84003	0.00405143	up	2.12262	0.0371977	up	-0.578168	0.747884	unchanged	-0.955654	0.0563444	unchanged
XUT1372	3.03769	6.15847e-05	up	1.31555	0.164385	unchanged	3.32993	0.00425847	up	1.37589	0.406979	unchanged	0.633299	0.244414	unchanged
XUT1373	3.12226	2.24968e-52	up	1.95757	4.18543e-20	up	2.52857	8.44008e-10	up	-0.967467	0.0913216	unchanged	-2.25967	3.32658e-25	down
XUT1374	3.59932	5.33807e-06	up	3.43667	4.2251e-05	up	1.95398	0.0532521	unchanged	1.12236	0.417728	unchanged	1.46013	0.00268716	up
XUT1375	2.47946	0.000993844	up	2.41223	0.00287228	up	3.27319	0.0286461	up	1.81231	NA	NA	1.03869	0.11646	unchanged
XUT1376	2.7748	0.00812895	up	2.3799	0.0444689	up	2.58055	0.196458	unchanged	-1.0046	NA	NA	-1.01643	0.433731	unchanged
XUT1377	3.22751	0.000559379	up	2.76229	0.00761502	up	2.9815	0.0569716	unchanged	0.492713	NA	NA	-0.732422	0.320827	unchanged
XUT1378	2.49405	0.0563302	unchanged	1.73646	1	unchanged	4.21368	0.196247	unchanged	0	NA	NA	-1.11976	0.487608	unchanged
XUT1379	3.08693	0.000158463	up	1.26675	0.225167	unchanged	2.28258	0.125449	unchanged	0.716281	NA	NA	1.44235	0.0110363	up
XUT1380	4.54229	4.96057e-07	up	2.20998	0.0423863	up	5.32702	0.00719408	up	3.76022	NA	NA	2.07454	0.00135262	up
XUT1381	2.24662	0.0937498	unchanged	1.94191	0.218018	unchanged	4.95084	0.023214	up	3.08651	NA	NA	1.1994	0.240692	unchanged
XUT1382	1.93571	4.77009e-05	up	1.23413	0.0219089	up	2.10844	0.0185002	up	1.15347	0.337191	unchanged	0.249382	0.725722	unchanged
XUT1383	2.10208	2.9442e-05	up	0.974208	0.106734	unchanged	1.93973	0.00711631	up	0.377342	0.752046	unchanged	0.530018	0.146076	unchanged
XUT1384	3.03206	1.32841e-15	up	2.09286	2.40877e-07	up	1.91739	0.0161989	up	-1.22677	0.317246	unchanged	-1.07411	0.0048266	down
XUT1385	1.43144	0.216776	unchanged	0.0700974	1	unchanged	0.132109	0.956978	unchanged	-1.0283	NA	NA	-2.36578	0.0392479	down
XUT1386	3.40713	2.38368e-35	up	1.21317	0.000113659	up	2.54634	6.32653e-05	up	-0.0781205	0.953988	unchanged	0.0392064	0.929569	unchanged
XUT1387	3.68478	0.569654	unchanged	0	1	unchanged	NA	NA	NA	NA	NA	NA	NA	NA	NA
XUT1388	4.14457	0.0720827	unchanged	2.28862	1	unchanged	1.62516	NA	NA	0	NA	NA	0.83358	0.879918	unchanged
XUT1389	3.70194	4.44647e-05	up	1.40827	0.238353	unchanged	2.97247	0.0307035	up	3.22875	0.0348194	up	3.23689	3.69695e-06	up
XUT1390	4.33967	0.105561	unchanged	4.27532	1	unchanged	3.62405	NA	NA	0	NA	NA	-0.938954	0.754306	unchanged
XUT1391	1.60172	0.0691145	unchanged	-0.17103	0.901879	unchanged	-0.317547	0.877597	unchanged	-1.80555	NA	NA	-0.566025	0.647426	unchanged
XUT1392	4.23078	2.00202e-44	up	2.54045	2.01675e-15	up	2.69532	5.75652e-06	up	-0.57265	0.574863	unchanged	-0.965724	0.000435709	unchanged
XUT1393	2.85255	4.91995e-15	up	1.10843	0.00918872	up	1.67653	0.0116735	up	-0.387138	0.73191	unchanged	-0.199905	0.720886	unchanged
XUT1394	1.74386	0.00402758	up	0.411231	0.624478	unchanged	1.30101	0.299789	unchanged	-2.26046	NA	NA	-0.885931	0.271584	unchanged
XUT1395	4.8074	2.02883e-14	up	2.11235	0.00416171	up	3.47023	0.0239969	up	1.60768	NA	NA	-0.47729	0.539344	unchanged
XUT1396	2.77517	1.06212e-34	up	2.02689	3.07328e-18	up	3.0038	3.69384e-12	up	1.95702	2.55742e-05	up	-0.893169	0.0732081	unchanged
XUT1397	2.87429	1.566e-16	up	2.16403	3.41886e-09	up	1.85978	0.00723083	up	-0.187766	0.881395	unchanged	-0.571792	0.174705	unchanged
XUT1398	1.9584	0.000170024	up	0.140368	0.861446	unchanged	1.71679	0.0748	unchanged	0.0967452	0.960139	unchanged	0.885253	0.0144819	unchanged
XUT1399	3.77898	1.71619e-06	up	1.77716	0.0629442	unchanged	2.9117	0.0260814	up	0.615041	NA	NA	3.22754	9.90789e-09	up
XUT1400	2.94568	1.85572e-12	up	1.67615	0.000306983	up	1.74363	0.015009	up	0.166058	0.896924	unchanged	1.03928	0.11289	unchanged
XUT1402	1.72956	0.0290769	up	-0.011271	0.992809	unchanged	-0.67909	0.67655	unchanged	-0.415589	NA	NA	-1.54263	0.293109	unchanged
XUT1403	3.21955	1.71066e-10	up	1.75312	0.00220069	up	2.19088	0.0131147	up	1.0134	0.411405	unchanged	3.3114	4.25754e-23	up
XUT1404	4.10518	6.72659e-09	up	2.18535	0.00792837	up	3.08702	0.0017694	up	0.671279	0.688734	unchanged	-0.44458	0.491427	unchanged
XUT1405	1.98912	0.00309058	up	0.221277	0.830621	unchanged	3.31916	0.0295497	up	-1.52558	NA	NA	-1.82212	0.0974088	unchanged
XUT1406	3.84373	6.68989e-07	up	2.70951	0.00163524	up	3.77285	0.01348	up	1.32037	NA	NA	-0.940667	0.227027	unchanged
XUT1407	4.74593	0.0171068	up	2.15953	1	unchanged	0.104164	NA	NA	-1.50374	NA	NA	-2.75305	0.49461	unchanged
XUT1408	5.14741	0.0397196	up	2.26503	1	unchanged	NA	NA	NA	NA	NA	NA	0.775334	0.8495	unchanged
XUT1409	2.92385	6.19227e-31	up	1.84033	4.61597e-12	up	1.72551	7.64683e-06	up	1.89833	1.74604e-06	up	1.13703	6.65957e-08	up
XUT1410	4.30773	2.13693e-23	up	1.47046	0.00438764	up	1.98908	0.00279138	up	1.25131	0.129325	unchanged	-0.570045	0.202703	unchanged
XUT1411	2.66382	8.8322e-26	up	1.52549	2.01512e-08	up	2.78808	6.60296e-11	up	0.318982	0.649551	unchanged	-1.1811	1.8481e-07	down
XUT1412	4.10978	3.15395e-69	up	2.43735	2.45245e-23	up	3.98401	5.36872e-16	up	0.369394	0.666022	unchanged	-1.29299	7.78696e-06	down
XUT1413	5.06379	0.0028071	up	3.13997	0.125469	unchanged	2.75121	0.213487	unchanged	1.6224	NA	NA	5.00889	0.000192218	up
XUT1414	2.44527	3.10313e-05	up	2.00803	0.00163869	up	2.20627	0.0154552	up	0.686412	0.624475	unchanged	-1.52113	0.00998359	down
XUT1415	5.32481	5.12293e-28	up	2.08545	0.000202076	up	2.97717	0.0333899	up	-0.65073	NA	NA	0.0275081	0.949376	unchanged
XUT1416	2.86544	1.50134e-05	up	1.85653	0.0136739	up	2.32811	0.010902	up	-0.401885	0.81436	unchanged	0.585399	0.218253	unchanged
XUT1417	5.04414	2.70059e-168	up	2.16694	2.46792e-29	up	2.12944	1.55251e-08	up	-0.66294	0.208074	unchanged	-0.128485	0.593777	unchanged
XUT1418	3.60899	0.0137398	up	0.423366	1	unchanged	1.99021	0.365606	unchanged	0.0186448	NA	NA	-4.11305	0.0236815	down
XUT1419	1.30366	0.149149	unchanged	-0.25455	0.85042	unchanged	-0.472301	0.783768	unchanged	-1.33724	NA	NA	-3.34355	0.116145	unchanged
XUT1420	1.68267	0.0249385	up	-0.300434	0.79147	unchanged	1.37839	0.33981	unchanged	-0.593718	NA	NA	-0.792302	0.5182	unchanged
XUT1421	1.08531	0.137249	unchanged	-0.124651	0.911618	unchanged	1.40326	0.319972	unchanged	0.0627656	NA	NA	-0.619847	0.607655	unchanged
XUT1423	4.53461	5.81783e-11	up	1.47676	0.0929586	unchanged	5.42168	0.00326953	up	-1.43668	NA	NA	-1.07158	0.249812	unchanged
XUT1424	4.16172	1.4958e-23	up	0.633581	0.278035	unchanged	2.91207	0.00306325	up	-0.987123	0.577541	unchanged	-2.36569	0.0171508	down
XUT1425	3.54755	6.46877e-12	up	-0.820317	0.310208	unchanged	-0.00797884	0.995046	unchanged	0.146632	NA	NA	-0.814147	0.0944264	unchanged
XUT1426	5.3938	1.06512e-86	up	2.80731	2.75895e-22	up	2.28437	2.98519e-05	up	0.205631	0.832562	unchanged	-0.847744	0.0373544	unchanged
XUT1427	3.63678	3.01235e-07	up	1.61639	0.0606533	unchanged	3.35528	0.0354909	up	1.45707	NA	NA	1.16041	0.212865	unchanged
XUT1428	3.36119	9.87115e-07	up	2.74597	0.000221144	up	2.66805	0.0848874	unchanged	-0.666915	NA	NA	-0.808123	0.22821	unchanged
XUT1429	2.67845	0.0760412	unchanged	1.14053	1	unchanged	1.18186	0.586114	unchanged	0.648554	NA	NA	1.81843	0.580776	unchanged
XUT1430	3.33467	1.84025e-15	up	1.36077	0.00543394	up	2.63726	0.00194797	up	-1.44258	0.327881	unchanged	-1.84465	4.30364e-05	down
XUT1431	2.30043	0.00030478	up	-0.464772	0.629917	unchanged	1.77797	0.153385	unchanged	-0.0237673	NA	NA	0.817865	0.272013	unchanged
XUT1432	3.99927	4.00515e-27	up	1.06068	0.0213085	up	2.01579	0.00828542	up	1.12013	0.263866	unchanged	2.83479	4.9505e-26	up
XUT1433	5.0359	2.51637e-201	up	2.89071	7.40187e-64	up	2.73053	9.12465e-16	up	-0.68347	0.154883	unchanged	-0.708544	4.42172e-05	unchanged
XUT1434	4.72474	8.07549e-144	up	2.38579	1.0483e-34	up	2.83614	2.3689e-12	up	0.545748	0.351534	unchanged	0.175241	0.557827	unchanged
XUT1435	3.33544	0.000207705	up	-0.994203	0.489221	unchanged	3.18742	0.0787419	unchanged	0.107737	NA	NA	-0.258429	0.741502	unchanged
XUT1436	6.14589	0.000655161	up	3.59146	1	unchanged	5.08585	0.0529613	unchanged	0	NA	NA	0.193936	0.904423	unchanged
XUT1437	5.64521	0.00716736	up	2.28631	1	unchanged	2.46766	0.370886	unchanged	-1.46484	NA	NA	0.333742	0.916307	unchanged
XUT1438	4.0234	1.57154e-249	up	1.30166	3.68093e-25	up	1.91186	1.35465e-12	up	-0.506223	0.14471	unchanged	-1.23501	3.72531e-18	down
XUT1439	2.36735	0.00701014	up	0.282911	0.834984	unchanged	0.464028	0.804376	unchanged	-1.28922	NA	NA	0.522426	0.721139	unchanged
XUT1440	3.24749	8.43355e-24	up	0.64982	0.117342	unchanged	2.06241	0.00157226	up	0.413828	0.695779	unchanged	2.21937	0.0221788	up
XUT1441	3.96814	3.95366e-21	up	2.36376	2.44015e-07	up	4.46194	4.57523e-10	up	1.32119	0.177275	unchanged	-0.100325	0.790637	unchanged
XUT1442	3.75085	2.55533e-27	up	1.21956	0.00309171	up	2.99203	9.75003e-06	up	1.20857	0.176867	unchanged	-0.178988	0.669938	unchanged
XUT1443	3.46472	0.00913769	up	0.544244	1	unchanged	3.95162	0.106934	unchanged	1.50798	NA	NA	-2.01185	0.114159	unchanged
XUT1444	3.40016	0.0494384	up	2.01204	1	unchanged	0.213689	0.951783	unchanged	0.129687	NA	NA	-0.945088	0.476203	unchanged
XUT1445	3.28819	0.000139142	up	0.0472959	0.974856	unchanged	2.03062	0.047996	up	-1.94697	0.237428	unchanged	0.405219	0.671958	unchanged
XUT1446	5.33504	1.89469e-61	up	0.889034	0.0362491	unchanged	2.37782	2.56954e-05	up	0.329465	0.734497	unchanged	0.624257	0.130288	unchanged
XUT1447	1.95485	0.0887204	unchanged	-0.394315	1	unchanged	-0.259716	0.890828	unchanged	-4.45274	NA	NA	-1.25907	0.142709	unchanged
XUT1448	3.59463	0.0062348	up	0.793946	0.685085	unchanged	5.08586	0.0496835	up	0	NA	NA	-2.89101	0.000100422	down
XUT1449	2.52699	0.000183929	up	0.472364	0.626835	unchanged	1.06403	0.460905	unchanged	-1.8071	NA	NA	-0.947766	0.403711	unchanged
XUT1450	3.54668	4.78463e-21	up	0.701358	0.15522	unchanged	2.79214	0.00122894	up	0.0137475	0.997246	unchanged	-2.47902	9.03901e-08	down
XUT1451	1.68871	0.240181	unchanged	0.524948	1	unchanged	-0.282012	0.921068	unchanged	-1.95799	NA	NA	-2.55721	0.360993	unchanged
XUT1452	4.13642	3.33837e-57	up	1.15244	0.000146337	up	2.40062	3.52728e-05	up	-0.0443299	0.975255	unchanged	-2.56224	8.54491e-21	down
XUT1453	3.28189	5.28703e-56	up	0.699313	0.00426067	unchanged	0.887439	0.0116281	unchanged	-1.37509	0.000720426	down	0.469812	0.0408186	unchanged
XUT1454	1.58159	0.0263	up	-0.30716	0.7732	unchanged	1.02928	0.441393	unchanged	-3.33069	NA	NA	-3.3203	0.0378868	down
XUT1455	1.56367	0.0279119	up	-0.531076	0.602012	unchanged	1.78697	0.12342	unchanged	-0.415992	NA	NA	-2.81075	0.231109	unchanged
XUT1456	6.52873	2.1734e-05	up	3.99587	0.0255263	up	1.79568	0.233142	unchanged	2.63261	0.117965	unchanged	1.46522	0.191448	unchanged
XUT1457	4.38397	1.04947e-25	up	1.89902	6.61714e-05	up	2.85665	0.000439242	up	0.976827	0.406308	unchanged	-0.379581	0.374455	unchanged
XUT1458	4.8729	4.93191e-77	up	1.71268	5.0009e-09	up	3.51922	7.739e-07	up	-0.231612	0.870109	unchanged	-0.00776154	0.983637	unchanged
XUT1459	3.67596	6.09716e-07	up	1.35696	0.147291	unchanged	1.82656	0.120765	unchanged	0.498818	0.795432	unchanged	0.594194	0.400203	unchanged
XUT1460	2.05963	0.0365818	up	2.71406	0.00935795	up	2.31718	0.134738	unchanged	0.384464	NA	NA	-2.6961	6.83811e-15	down
XUT1462	2.71507	6.85318e-06	up	-0.0497559	0.962803	unchanged	2.20538	0.0735743	unchanged	-0.54693	NA	NA	0.485441	0.434559	unchanged
XUT1463	4.88851	6.40033e-24	up	2.30272	2.55994e-05	up	5.2793	0.00130396	up	4.83771	0.00779838	up	0.439397	0.625182	unchanged
XUT1464	3.31767	1.32532e-11	up	1.7565	0.00166937	up	1.98381	0.00852266	up	0.757383	0.495334	unchanged	2.08878	6.99201e-08	up
XUT1465	4.79623	6.72903e-29	up	1.02728	0.0671723	unchanged	1.60839	0.0554927	unchanged	-0.012893	0.997167	unchanged	-0.792879	0.0415441	unchanged
XUT1466	4.22912	2.92574e-07	up	0.94639	0.412265	unchanged	1.59637	0.280274	unchanged	-1.01837	NA	NA	-1.2394	0.131988	unchanged
XUT1467	5.29582	4.67954e-98	up	3.31557	5.61028e-37	up	2.64743	3.91704e-10	up	-0.0745251	0.93127	unchanged	0.824802	0.0113077	unchanged
XUT1468	2.84282	2.83666e-09	up	2.40443	1.97143e-06	up	2.8904	0.000379358	up	1.3695	0.200494	unchanged	1.34716	0.00317644	up
XUT1469	3.13576	9.96693e-30	up	2.30052	1.16932e-15	up	2.72929	6.87687e-10	up	1.13688	0.0335352	up	2.60308	9.69892e-28	up
XUT1470	4.35351	1.78879e-21	up	2.73478	2.85412e-08	up	2.29266	0.00689054	up	1.13498	0.323593	unchanged	-0.437386	0.416072	unchanged
XUT1471	2.273	6.41094e-42	up	1.35056	1.04283e-14	up	2.03956	7.8592e-11	up	0.427829	0.321144	unchanged	0.360046	0.693895	unchanged
XUT1472	8.59369	8.86846e-09	up	3.62498	0.0431561	up	5.20925	0.0255535	up	1.50564	NA	NA	-0.230031	0.794603	unchanged
XUT1473	2.92443	0.0008012	up	0.977823	0.399216	unchanged	1.18381	0.327987	unchanged	-2.31206	NA	NA	-0.343019	0.63805	unchanged
XUT1474	3.125	6.73463e-52	up	1.74248	9.95474e-16	up	2.49608	1.41728e-08	up	-0.389432	0.598432	unchanged	-1.44643	9.46418e-09	down
XUT1478	3.60961	0.018472	up	1.10467	1	unchanged	2.09752	0.443217	unchanged	-2.51203	NA	NA	1.64834	0.0734529	unchanged
XUT1479	3.0291	1.26707e-17	up	2.59779	1.15156e-12	up	3.21516	8.75447e-08	up	0.26141	0.81218	unchanged	-0.893495	0.00200404	unchanged
XUT1480	3.63769	2.70369e-48	up	1.26784	7.2188e-06	up	1.84082	2.75462e-05	up	0.570745	0.351513	unchanged	1.17017	6.98792e-07	up
XUT1481	2.62234	5.13141e-06	up	0.62579	0.41837	unchanged	1.77766	0.0731559	unchanged	-1.91837	0.23887	unchanged	-0.393313	0.446995	unchanged
XUT1482	2.96662	0.100507	unchanged	1.36212	1	unchanged	4.62408	0.163768	unchanged	0	NA	NA	-0.769635	0.530156	unchanged
XUT1483	3.08181	2.31739e-09	up	1.34679	0.0298929	up	1.39813	0.0446978	up	1.70966	0.0238756	up	4.12802	1.22196e-45	up
XUT1484	0.670683	0.580652	unchanged	0.336916	0.836723	unchanged	0.429956	0.735615	unchanged	-0.385799	NA	NA	-0.453633	0.759458	unchanged
XUT1486	2.98409	2.95212e-10	up	0.895282	0.133288	unchanged	2.06671	0.0132161	up	0.800018	0.51141	unchanged	0.48039	0.165771	unchanged
XUT1488	1.52524	0.725298	unchanged	-0.196113	1	unchanged	0	NA	NA	0	NA	NA	NA	NA	NA
XUT1489	2.22877	7.12496e-11	up	0.709892	0.0896957	unchanged	2.55963	6.4681e-05	up	0.659408	0.494668	unchanged	-0.316594	0.471158	unchanged
XUT1490	3.28572	4.07551e-17	up	1.823	2.29769e-05	up	2.56849	8.29096e-05	up	0.639298	0.519879	unchanged	0.471864	0.175609	unchanged
XUT1491	3.75927	2.13952e-12	up	2.01064	0.000854171	up	2.30622	0.00562211	up	0.874893	0.462943	unchanged	1.34222	0.00780708	up
XUT1492	2.50707	4.21188e-08	up	0.00644362	0.993201	unchanged	1.00748	0.206364	unchanged	0.509209	0.671623	unchanged	-0.640678	0.0757025	unchanged
XUT1493	3.63689	6.1214e-19	up	2.56888	3.27958e-09	up	3.71691	6.12888e-09	up	-0.520976	0.674038	unchanged	0.572813	0.247278	unchanged
XUT1494	2.73491	5.16126e-05	up	1.95358	0.00989287	up	4.34437	0.000270509	up	1.30137	0.471512	unchanged	-0.309231	0.683776	unchanged
XUT1496	3.67183	9.6444e-29	up	1.58419	1.87327e-05	up	2.43138	0.000176747	up	-1.29169	0.203414	unchanged	-2.0737	4.87661e-09	down
XUT1497	1.97772	0.000802748	up	0.681273	0.375488	unchanged	1.68413	0.0790346	unchanged	-1.57315	0.304396	unchanged	0.376296	0.605894	unchanged
XUT1498	2.52855	2.86818e-98	up	0.918324	4.61361e-13	unchanged	1.08679	3.99311e-05	up	0.0301621	0.952494	unchanged	0.330503	0.195976	unchanged
XUT1499	2.80816	3.16935e-05	up	1.13777	0.175256	unchanged	1.19671	0.375803	unchanged	0.776658	NA	NA	1.19985	0.000339465	up
XUT1500	1.97899	6.52429e-09	up	0.818969	0.0410513	unchanged	1.31196	0.0292307	up	1.0005	0.174432	unchanged	-1.25932	0.000129223	down
XUT1501	3.13332	1.58963e-11	up	2.32448	3.01063e-06	up	2.20472	0.0485893	up	1.14684	0.463074	unchanged	0.49997	0.328809	unchanged
XUT1502	2.75269	0.0114822	up	0.823575	0.59009	unchanged	2.94464	0.0851469	unchanged	-2.98847	NA	NA	-2.94627	0.0924155	unchanged
XUT1503	4.29456	4.90603e-50	up	2.62999	4.42949e-18	up	3.03129	2.08115e-07	up	-0.815172	0.406979	unchanged	-1.08802	0.000425542	down
XUT1505	2.87823	0.116174	unchanged	1.60923	1	unchanged	0.271814	0.916041	unchanged	-0.349981	NA	NA	-0.360503	0.787767	unchanged
XUT1506	1.65369	0.0426833	up	-0.556705	0.635213	unchanged	1.35281	0.378553	unchanged	0.0760121	NA	NA	-2.73528	9.27476e-07	down
XUT1507	3.52272	3.72453e-13	up	1.35613	0.0197749	up	2.394	0.0122666	up	-0.37161	0.835721	unchanged	0.543114	0.230598	unchanged
XUT1508	3.26213	2.68358e-09	up	2.37423	6.58672e-05	up	2.1904	0.0167174	up	1.26215	0.294268	unchanged	2.16856	1.41109e-11	up
XUT1509	2.04743	0.0496991	up	0.170971	0.918115	unchanged	0.942879	0.620242	unchanged	0.392755	NA	NA	2.47543	0.0121574	up
XUT1510	3.37163	1.46999e-36	up	1.31373	1.2077e-05	up	2.59982	1.40474e-06	up	-1.19985	0.142573	unchanged	-0.666819	0.01146	unchanged
XUT1511	2.39198	1.07276e-103	up	0.318708	0.0128751	unchanged	0.939981	0.000180566	unchanged	-0.895632	0.00120211	unchanged	-0.924816	1.15264e-10	unchanged
XUT1512	2.39019	1.20733e-07	up	0.19209	0.785356	unchanged	1.43157	0.0732343	unchanged	0.332197	0.798731	unchanged	0.456679	0.501787	unchanged
XUT1513	3.5692	1.63e-24	up	2.15173	9.97522e-09	up	2.49517	0.000105146	up	-0.193429	0.875211	unchanged	-0.814659	0.0276813	unchanged
XUT1514	1.59961	0.00571852	up	-0.0358884	0.968714	unchanged	2.35449	0.034843	up	0.405524	0.834354	unchanged	-2.12511	1.59336e-05	down
XUT1515	2.8307	0.000359182	up	1.24602	0.211013	unchanged	2.4095	0.0437003	up	-2.82189	NA	NA	-1.90332	0.0646339	unchanged
XUT1516	4.00669	1.23652e-13	up	1.68666	0.00833037	up	2.80148	0.00111065	up	-0.19214	0.912403	unchanged	0.983216	0.0233556	unchanged
XUT1517	2.62277	0.000315919	up	0.832644	0.390951	unchanged	1.19576	0.315229	unchanged	2.36434	0.0633894	unchanged	1.76833	0.00070222	up
XUT1518	3.06456	0.00127393	up	2.1465	0.0508785	unchanged	5.08682	0.0178941	up	1.43097	NA	NA	-0.0537679	0.948374	unchanged
XUT1519	3.62169	0.162737	unchanged	3.59438	1	unchanged	1.62523	NA	NA	0	NA	NA	-1.90378	0.720886	unchanged
XUT1520	3.59951	5.97781e-28	up	1.73276	1.94471e-06	up	3.59054	6.68109e-09	up	-1.17574	0.278344	unchanged	-1.22998	5.90258e-05	down
XUT1521	2.56292	4.05456e-06	up	-0.141325	0.875955	unchanged	1.30813	0.284334	unchanged	-0.880114	NA	NA	-2.48031	0.000487784	down
XUT1522	2.12051	1.75809e-11	up	0.940505	0.00917998	unchanged	1.77578	0.00204519	up	-0.415695	0.667041	unchanged	0.363325	0.300885	unchanged
XUT1523	2.62219	2.29624e-58	up	0.541068	0.00460727	unchanged	0.807239	0.0116402	unchanged	-0.388814	0.374355	unchanged	-1.14807	9.93972e-18	down
XUT1524	3.51691	1.02033e-05	up	0.294229	0.823304	unchanged	2.38251	0.0528425	unchanged	-1.65789	0.452579	unchanged	-2.1748	0.0104373	down
XUT1525	2.90433	1.52649e-37	up	2.06619	1.1475e-18	up	3.46602	1.88451e-14	up	-1.29957	0.0569452	unchanged	-2.34537	1.78917e-26	down
XUT1526	3.9751	2.01014e-26	up	1.64873	0.000102197	up	1.99013	0.0123403	up	-5.97714	0.00106151	down	-2.83612	4.08847e-08	down
XUT1527	3.86955	0.0572928	unchanged	2.63459	1	unchanged	3.21366	NA	NA	0	NA	NA	-1.49643	0.178902	unchanged
XUT1528	3.12018	3.55463e-14	up	1.82757	5.4312e-05	up	2.15637	0.0112816	up	-1.45889	0.286246	unchanged	-1.52187	4.32639e-07	down
XUT1529	3.22668	7.29518e-81	up	1.35695	6.25493e-14	up	1.7402	4.12925e-07	up	-0.382525	0.453648	unchanged	0.0148123	0.964484	unchanged
XUT1530	4.2039	1.26099e-09	up	2.14723	0.0076816	up	3.83022	0.0123182	up	-0.0496621	NA	NA	-2.01373	0.0150535	down
XUT1532	4.77294	0.055087	unchanged	3.23067	1	unchanged	1.62516	NA	NA	1.40316	NA	NA	NA	NA	NA
XUT1533	NA	NA	NA	NA	NA	NA	NA	NA	NA	NA	NA	NA	NA	NA	NA
XUT1534	0	1	unchanged	0	1	unchanged	NA	NA	NA	NA	NA	NA	NA	NA	NA
XUT1535	2.33966	1.47642e-08	up	1.30112	0.0054674	up	2.0456	0.00321594	up	4.62346	5.39707e-13	up	2.07478	1.98071e-14	up
XUT1536	2.89361	1.45362e-13	up	1.70337	7.58101e-05	up	1.24437	0.126526	unchanged	-0.0725423	0.965623	unchanged	-1.4387	0.000316654	down
[truncated: 258 more rows]
