# Supplementary material
Source: HighWire-hosted journal article supplement (doi:10.1101/rna.079903.123)
Supplement: Supplemental_TableS2.xlsx [file Supplemental_TableS2.xlsx]

## Sheet: Translated XUTs
XUT ID	NMD-sensitive	CHX-sensitive	List 1 - translated XUTs (pooled data)	List 2 - translated XUTs (per condition)	List 3 - translated XUTs (per condition; ≥10 reads/smORF)
XUT1813	TRUE	TRUE	TRUE	TRUE	TRUE
XUT0927	TRUE	TRUE	TRUE	TRUE	FALSE
XUT0928	TRUE	TRUE	TRUE	TRUE	TRUE
XUT0929	TRUE	TRUE	FALSE	FALSE	FALSE
XUT0930	TRUE	TRUE	FALSE	FALSE	FALSE
XUT0931	TRUE	TRUE	FALSE	TRUE	FALSE
XUT0001	TRUE	FALSE	TRUE	TRUE	TRUE
XUT0932	TRUE	TRUE	FALSE	FALSE	FALSE
XUT0002	TRUE	TRUE	FALSE	FALSE	FALSE
XUT0003	TRUE	TRUE	FALSE	FALSE	FALSE
XUT0004	TRUE	TRUE	FALSE	FALSE	FALSE
XUT0933	TRUE	TRUE	TRUE	TRUE	TRUE
XUT0934	TRUE	TRUE	FALSE	FALSE	FALSE
XUT0935	TRUE	FALSE	FALSE	FALSE	FALSE
XUT0936	TRUE	TRUE	FALSE	FALSE	FALSE
XUT0005	TRUE	TRUE	FALSE	FALSE	FALSE
XUT0006	TRUE	TRUE	TRUE	TRUE	FALSE
XUT0007	FALSE	TRUE	FALSE	FALSE	FALSE
XUT0008	TRUE	TRUE	TRUE	FALSE	FALSE
XUT0937	TRUE	TRUE	FALSE	FALSE	FALSE
XUT0938	TRUE	TRUE	TRUE	FALSE	FALSE
XUT0939	TRUE	FALSE	FALSE	FALSE	FALSE
XUT0009	TRUE	TRUE	FALSE	TRUE	TRUE
XUT0010	TRUE	TRUE	FALSE	FALSE	FALSE
XUT0940	FALSE	TRUE	TRUE	TRUE	TRUE
XUT0011	FALSE	FALSE	FALSE	FALSE	FALSE
XUT0012	FALSE	TRUE	TRUE	TRUE	TRUE
XUT0013	TRUE	TRUE	TRUE	TRUE	FALSE
XUT0942	FALSE	TRUE	FALSE	TRUE	TRUE
XUT0943	TRUE	TRUE	TRUE	TRUE	TRUE
XUT0944	FALSE	FALSE	FALSE	FALSE	FALSE
XUT0014	TRUE	TRUE	TRUE	TRUE	TRUE
XUT0945	TRUE	TRUE	FALSE	FALSE	FALSE
XUT0946	TRUE	TRUE	FALSE	FALSE	FALSE
XUT0947	TRUE	TRUE	FALSE	FALSE	FALSE
XUT0948	TRUE	FALSE	FALSE	FALSE	FALSE
XUT0949	TRUE	TRUE	TRUE	TRUE	FALSE
XUT0015	TRUE	TRUE	FALSE	FALSE	FALSE
XUT0016	TRUE	FALSE	FALSE	FALSE	FALSE
XUT0950	TRUE	TRUE	FALSE	FALSE	FALSE
XUT0951	TRUE	TRUE	FALSE	FALSE	FALSE
XUT0017	TRUE	TRUE	TRUE	TRUE	FALSE
XUT0952	TRUE	TRUE	FALSE	FALSE	FALSE
XUT0020	FALSE	TRUE	FALSE	TRUE	TRUE
XUT0021	TRUE	TRUE	FALSE	FALSE	FALSE
XUT0022	TRUE	TRUE	FALSE	FALSE	FALSE
XUT0023	FALSE	TRUE	TRUE	FALSE	FALSE
XUT0953	TRUE	TRUE	FALSE	TRUE	FALSE
XUT0024	TRUE	TRUE	FALSE	FALSE	FALSE
XUT0025	TRUE	TRUE	FALSE	FALSE	FALSE
XUT0026	TRUE	TRUE	FALSE	FALSE	FALSE
XUT0954	TRUE	TRUE	TRUE	TRUE	TRUE
XUT0027	FALSE	FALSE	TRUE	TRUE	TRUE
XUT0955	TRUE	TRUE	TRUE	TRUE	TRUE
XUT0957	FALSE	TRUE	TRUE	TRUE	TRUE
XUT0958	TRUE	TRUE	FALSE	FALSE	FALSE
XUT0959	TRUE	TRUE	FALSE	FALSE	FALSE
XUT0960	TRUE	TRUE	FALSE	TRUE	TRUE
XUT0961	TRUE	TRUE	TRUE	TRUE	TRUE
XUT0962	TRUE	TRUE	FALSE	FALSE	FALSE
XUT0029	FALSE	TRUE	FALSE	FALSE	FALSE
XUT0031	FALSE	TRUE	TRUE	FALSE	FALSE
XUT0032	TRUE	FALSE	FALSE	FALSE	FALSE
XUT0963	TRUE	TRUE	FALSE	FALSE	FALSE
XUT0964	TRUE	TRUE	TRUE	TRUE	TRUE
XUT0033	TRUE	TRUE	TRUE	TRUE	TRUE
XUT0034	FALSE	TRUE	TRUE	TRUE	TRUE
XUT0965	TRUE	TRUE	TRUE	TRUE	FALSE
XUT0035	TRUE	TRUE	TRUE	TRUE	TRUE
XUT0966	TRUE	FALSE	FALSE	FALSE	FALSE
XUT0967	TRUE	TRUE	TRUE	TRUE	TRUE
XUT0968	TRUE	TRUE	TRUE	FALSE	FALSE
XUT0037	TRUE	TRUE	TRUE	TRUE	TRUE
XUT0969	TRUE	TRUE	FALSE	FALSE	FALSE
XUT0038	FALSE	TRUE	FALSE	FALSE	FALSE
XUT0039	FALSE	TRUE	TRUE	TRUE	FALSE
XUT0040	TRUE	TRUE	FALSE	FALSE	FALSE
XUT0041	TRUE	TRUE	TRUE	FALSE	FALSE
XUT0042	TRUE	TRUE	FALSE	FALSE	FALSE
XUT0043	TRUE	TRUE	FALSE	FALSE	FALSE
XUT0044	FALSE	TRUE	FALSE	FALSE	FALSE
XUT0045	TRUE	TRUE	TRUE	TRUE	TRUE
XUT0970	FALSE	FALSE	FALSE	FALSE	FALSE
XUT0971	TRUE	TRUE	TRUE	TRUE	TRUE
XUT0973	TRUE	TRUE	TRUE	TRUE	TRUE
XUT0046	TRUE	TRUE	FALSE	FALSE	FALSE
XUT0047	TRUE	TRUE	TRUE	TRUE	TRUE
XUT0048	FALSE	TRUE	TRUE	TRUE	TRUE
XUT0049	FALSE	TRUE	TRUE	TRUE	FALSE
XUT0050	TRUE	TRUE	TRUE	TRUE	TRUE
XUT0051	TRUE	TRUE	TRUE	TRUE	FALSE
XUT0974	TRUE	TRUE	TRUE	TRUE	TRUE
XUT0052	FALSE	TRUE	FALSE	FALSE	FALSE
XUT0053	FALSE	TRUE	FALSE	FALSE	FALSE
XUT0976	TRUE	TRUE	FALSE	FALSE	FALSE
XUT0977	TRUE	TRUE	FALSE	FALSE	FALSE
XUT0054	FALSE	TRUE	TRUE	FALSE	FALSE
XUT0055	FALSE	TRUE	FALSE	FALSE	FALSE
XUT0056	TRUE	TRUE	TRUE	FALSE	FALSE
XUT0057	TRUE	TRUE	TRUE	FALSE	FALSE
XUT0058	TRUE	FALSE	FALSE	FALSE	FALSE
XUT0059	FALSE	TRUE	FALSE	FALSE	FALSE
XUT0060	TRUE	TRUE	TRUE	FALSE	FALSE
XUT0061	FALSE	TRUE	FALSE	FALSE	FALSE
XUT0978	FALSE	TRUE	FALSE	FALSE	FALSE
XUT0062	FALSE	TRUE	TRUE	FALSE	FALSE
XUT0063	TRUE	TRUE	FALSE	FALSE	FALSE
XUT0064	FALSE	FALSE	FALSE	FALSE	FALSE
XUT0980	TRUE	TRUE	FALSE	FALSE	FALSE
XUT0065	TRUE	TRUE	FALSE	FALSE	FALSE
XUT0066	TRUE	TRUE	TRUE	TRUE	TRUE
XUT0981	TRUE	TRUE	TRUE	TRUE	TRUE
XUT0982	TRUE	TRUE	TRUE	TRUE	TRUE
XUT0983	FALSE	TRUE	FALSE	TRUE	TRUE
XUT0984	FALSE	FALSE	FALSE	TRUE	FALSE
XUT0067	TRUE	TRUE	FALSE	FALSE	FALSE
XUT0068	TRUE	TRUE	FALSE	FALSE	FALSE
XUT0986	TRUE	TRUE	TRUE	FALSE	FALSE
XUT0069	TRUE	TRUE	TRUE	TRUE	TRUE
XUT0070	FALSE	TRUE	TRUE	TRUE	TRUE
XUT0071	FALSE	TRUE	FALSE	FALSE	FALSE
XUT0987	TRUE	TRUE	TRUE	TRUE	TRUE
XUT0072	FALSE	TRUE	FALSE	FALSE	FALSE
XUT0988	TRUE	TRUE	TRUE	TRUE	TRUE
XUT0989	TRUE	TRUE	FALSE	FALSE	FALSE
XUT0990	TRUE	TRUE	FALSE	FALSE	FALSE
XUT0991	FALSE	TRUE	FALSE	FALSE	FALSE
XUT0073	TRUE	TRUE	FALSE	FALSE	FALSE
XUT0992	FALSE	TRUE	FALSE	FALSE	FALSE
XUT0075	TRUE	TRUE	TRUE	TRUE	FALSE
XUT0076	TRUE	TRUE	FALSE	FALSE	FALSE
XUT0993	TRUE	TRUE	FALSE	FALSE	FALSE
XUT0994	TRUE	TRUE	FALSE	FALSE	FALSE
XUT0995	TRUE	TRUE	FALSE	FALSE	FALSE
XUT0078	TRUE	TRUE	FALSE	FALSE	FALSE
XUT0996	TRUE	TRUE	FALSE	FALSE	FALSE
XUT0997	TRUE	TRUE	TRUE	FALSE	FALSE
XUT0079	FALSE	FALSE	FALSE	TRUE	FALSE
XUT0999	TRUE	TRUE	TRUE	TRUE	TRUE
XUT1000	TRUE	TRUE	FALSE	FALSE	FALSE
XUT1002	TRUE	TRUE	FALSE	FALSE	FALSE
XUT0081	TRUE	TRUE	FALSE	TRUE	TRUE
XUT1003	FALSE	TRUE	FALSE	FALSE	FALSE
XUT0082	TRUE	TRUE	FALSE	FALSE	FALSE
XUT0083	TRUE	TRUE	TRUE	TRUE	TRUE
XUT1007	FALSE	FALSE	TRUE	FALSE	FALSE
XUT1008	FALSE	TRUE	TRUE	TRUE	FALSE
XUT0085	FALSE	TRUE	FALSE	FALSE	FALSE
XUT0086	TRUE	TRUE	TRUE	TRUE	TRUE
XUT0087	TRUE	TRUE	FALSE	FALSE	FALSE
XUT1009	TRUE	TRUE	FALSE	FALSE	FALSE
XUT0088	TRUE	TRUE	FALSE	FALSE	FALSE
XUT0089	TRUE	TRUE	FALSE	FALSE	FALSE
XUT0092	FALSE	TRUE	FALSE	FALSE	FALSE
XUT0093	FALSE	TRUE	FALSE	FALSE	FALSE
XUT1011	TRUE	TRUE	TRUE	TRUE	TRUE
XUT1012	TRUE	TRUE	TRUE	FALSE	FALSE
XUT0094	TRUE	TRUE	TRUE	TRUE	TRUE
XUT1013	TRUE	TRUE	TRUE	TRUE	TRUE
XUT0095	TRUE	TRUE	FALSE	FALSE	FALSE
XUT0096	TRUE	TRUE	TRUE	FALSE	FALSE
XUT0097	FALSE	FALSE	FALSE	FALSE	FALSE
XUT0098	TRUE	TRUE	FALSE	FALSE	FALSE
XUT1014	TRUE	TRUE	TRUE	TRUE	TRUE
XUT0099	TRUE	TRUE	TRUE	TRUE	TRUE
XUT0101	TRUE	TRUE	FALSE	FALSE	FALSE
XUT0102	TRUE	TRUE	FALSE	FALSE	FALSE
XUT0103	TRUE	TRUE	FALSE	FALSE	FALSE
XUT1015	FALSE	TRUE	TRUE	TRUE	TRUE
XUT0104	TRUE	TRUE	TRUE	TRUE	TRUE
XUT0105	TRUE	TRUE	TRUE	TRUE	TRUE
XUT0106	TRUE	TRUE	TRUE	TRUE	TRUE
XUT0107	TRUE	TRUE	FALSE	FALSE	FALSE
XUT0108	TRUE	TRUE	FALSE	FALSE	FALSE
XUT0109	FALSE	FALSE	TRUE	TRUE	TRUE
XUT0110	TRUE	TRUE	FALSE	FALSE	FALSE
XUT0111	TRUE	TRUE	TRUE	TRUE	TRUE
XUT0112	FALSE	TRUE	FALSE	FALSE	FALSE
XUT1017	TRUE	TRUE	TRUE	FALSE	FALSE
XUT0113	FALSE	FALSE	TRUE	FALSE	FALSE
XUT1018	FALSE	TRUE	FALSE	FALSE	FALSE
XUT1019	TRUE	TRUE	FALSE	FALSE	FALSE
XUT0114	FALSE	FALSE	TRUE	TRUE	TRUE
XUT0115	TRUE	TRUE	TRUE	TRUE	TRUE
XUT0116	TRUE	TRUE	FALSE	FALSE	FALSE
XUT0117	TRUE	TRUE	FALSE	FALSE	FALSE
XUT1020	FALSE	TRUE	FALSE	FALSE	FALSE
XUT1021	TRUE	FALSE	FALSE	FALSE	FALSE
XUT0118	TRUE	TRUE	TRUE	FALSE	FALSE
XUT0119	FALSE	TRUE	FALSE	FALSE	FALSE
XUT0120	TRUE	TRUE	FALSE	FALSE	FALSE
XUT0121	FALSE	TRUE	FALSE	FALSE	FALSE
XUT0122	TRUE	TRUE	TRUE	TRUE	TRUE
XUT1022	TRUE	TRUE	TRUE	TRUE	TRUE
XUT1023	TRUE	TRUE	FALSE	FALSE	FALSE
XUT1024	TRUE	TRUE	FALSE	FALSE	FALSE
XUT1025	TRUE	FALSE	TRUE	FALSE	FALSE
XUT1026	TRUE	TRUE	FALSE	FALSE	FALSE
XUT1027	TRUE	TRUE	FALSE	FALSE	FALSE
XUT1028	TRUE	TRUE	FALSE	FALSE	FALSE
XUT0123	TRUE	TRUE	TRUE	FALSE	FALSE
XUT0124	TRUE	TRUE	FALSE	FALSE	FALSE
XUT1029	FALSE	FALSE	FALSE	FALSE	FALSE
XUT0125	TRUE	TRUE	TRUE	TRUE	TRUE
XUT0126	TRUE	TRUE	TRUE	FALSE	FALSE
XUT0127	TRUE	TRUE	TRUE	TRUE	TRUE
XUT1030	TRUE	TRUE	TRUE	TRUE	FALSE
XUT0128	TRUE	TRUE	FALSE	FALSE	FALSE
XUT0129	TRUE	TRUE	TRUE	TRUE	TRUE
XUT0130	TRUE	TRUE	FALSE	FALSE	FALSE
XUT0131	TRUE	TRUE	TRUE	FALSE	FALSE
XUT0132	TRUE	TRUE	TRUE	TRUE	TRUE
XUT0134	TRUE	TRUE	TRUE	TRUE	FALSE
XUT0135	TRUE	TRUE	FALSE	FALSE	FALSE
XUT0136	TRUE	TRUE	FALSE	FALSE	FALSE
XUT1031	FALSE	TRUE	TRUE	TRUE	TRUE
XUT1032	TRUE	TRUE	FALSE	TRUE	TRUE
XUT1033	FALSE	FALSE	FALSE	FALSE	FALSE
XUT1034	TRUE	TRUE	TRUE	TRUE	TRUE
XUT0137	TRUE	TRUE	TRUE	TRUE	FALSE
XUT0140	FALSE	TRUE	TRUE	FALSE	FALSE
XUT1036	TRUE	TRUE	TRUE	TRUE	TRUE
XUT0141	FALSE	TRUE	TRUE	TRUE	FALSE
XUT0142	FALSE	TRUE	TRUE	TRUE	TRUE
XUT1037	FALSE	TRUE	TRUE	FALSE	FALSE
XUT1038	TRUE	TRUE	TRUE	TRUE	TRUE
XUT1039	TRUE	TRUE	FALSE	FALSE	FALSE
XUT0143	TRUE	TRUE	TRUE	TRUE	TRUE
XUT1040	TRUE	TRUE	TRUE	FALSE	FALSE
XUT1041	TRUE	TRUE	FALSE	TRUE	TRUE
XUT1042	TRUE	TRUE	FALSE	FALSE	FALSE
XUT0144	FALSE	TRUE	FALSE	TRUE	TRUE
XUT1043	TRUE	TRUE	TRUE	TRUE	FALSE
XUT1044	TRUE	TRUE	FALSE	FALSE	FALSE
XUT1045	TRUE	TRUE	TRUE	FALSE	FALSE
XUT0145	TRUE	TRUE	FALSE	FALSE	FALSE
XUT0146	FALSE	TRUE	FALSE	FALSE	FALSE
XUT0147	TRUE	TRUE	TRUE	TRUE	TRUE
XUT0148	FALSE	TRUE	TRUE	TRUE	TRUE
XUT0149	TRUE	TRUE	TRUE	TRUE	FALSE
XUT0150	TRUE	TRUE	TRUE	TRUE	TRUE
XUT0151	FALSE	TRUE	FALSE	FALSE	FALSE
XUT0152	FALSE	TRUE	FALSE	FALSE	FALSE
XUT0153	TRUE	TRUE	FALSE	FALSE	FALSE
XUT0154	TRUE	TRUE	FALSE	FALSE	FALSE
XUT1046	TRUE	TRUE	FALSE	FALSE	FALSE
XUT0155	FALSE	FALSE	FALSE	FALSE	FALSE
XUT0156	TRUE	TRUE	TRUE	TRUE	TRUE
XUT1047	TRUE	TRUE	FALSE	FALSE	FALSE
XUT0157	FALSE	TRUE	TRUE	TRUE	FALSE
XUT1048	FALSE	TRUE	FALSE	FALSE	FALSE
XUT0158	FALSE	FALSE	TRUE	FALSE	FALSE
XUT0159	FALSE	FALSE	FALSE	FALSE	FALSE
XUT1049	FALSE	TRUE	FALSE	TRUE	TRUE
XUT1050	FALSE	FALSE	FALSE	FALSE	FALSE
XUT0160	TRUE	TRUE	FALSE	FALSE	FALSE
XUT1051	TRUE	TRUE	TRUE	TRUE	FALSE
XUT1052	TRUE	TRUE	TRUE	TRUE	TRUE
XUT0161	TRUE	TRUE	FALSE	FALSE	FALSE
XUT0162	FALSE	TRUE	FALSE	TRUE	FALSE
XUT0163	FALSE	TRUE	TRUE	TRUE	TRUE
XUT0164	FALSE	TRUE	TRUE	FALSE	FALSE
XUT1053	FALSE	TRUE	TRUE	TRUE	TRUE
XUT0165	FALSE	TRUE	FALSE	FALSE	FALSE
XUT1054	TRUE	TRUE	TRUE	TRUE	FALSE
XUT0166	TRUE	TRUE	TRUE	TRUE	TRUE
XUT0167	TRUE	TRUE	FALSE	FALSE	FALSE
XUT0169	TRUE	TRUE	TRUE	FALSE	FALSE
XUT1056	TRUE	TRUE	FALSE	TRUE	TRUE
XUT0170	TRUE	TRUE	TRUE	TRUE	TRUE
XUT1057	TRUE	TRUE	TRUE	TRUE	TRUE
XUT0171	FALSE	FALSE	FALSE	FALSE	FALSE
XUT0172	FALSE	TRUE	FALSE	FALSE	FALSE
XUT0173	FALSE	FALSE	FALSE	FALSE	FALSE
XUT0174	TRUE	TRUE	FALSE	FALSE	FALSE
XUT1058	TRUE	TRUE	FALSE	TRUE	TRUE
XUT1059	TRUE	TRUE	FALSE	FALSE	FALSE
XUT1060	FALSE	TRUE	TRUE	TRUE	TRUE
XUT0175	FALSE	TRUE	TRUE	TRUE	FALSE
XUT0176	TRUE	TRUE	TRUE	TRUE	TRUE
XUT1061	FALSE	TRUE	FALSE	FALSE	FALSE
XUT1063	TRUE	TRUE	TRUE	TRUE	TRUE
XUT0178	TRUE	TRUE	TRUE	TRUE	TRUE
XUT0179	TRUE	TRUE	TRUE	TRUE	TRUE
XUT0180	TRUE	TRUE	TRUE	TRUE	TRUE
XUT1064	TRUE	TRUE	TRUE	TRUE	TRUE
XUT0181	TRUE	TRUE	FALSE	FALSE	FALSE
XUT0182	TRUE	TRUE	FALSE	FALSE	FALSE
XUT1065	FALSE	TRUE	FALSE	FALSE	FALSE
XUT0183	TRUE	TRUE	TRUE	TRUE	TRUE
XUT0184	TRUE	TRUE	TRUE	FALSE	FALSE
XUT0185	TRUE	FALSE	FALSE	FALSE	FALSE
XUT1068	TRUE	TRUE	TRUE	TRUE	TRUE
XUT1069	FALSE	TRUE	FALSE	TRUE	TRUE
XUT1070	TRUE	TRUE	TRUE	TRUE	TRUE
XUT1071	TRUE	TRUE	TRUE	TRUE	TRUE
XUT0187	TRUE	TRUE	FALSE	TRUE	TRUE
XUT0188	TRUE	TRUE	FALSE	FALSE	FALSE
XUT0189	TRUE	TRUE	TRUE	TRUE	TRUE
XUT0190	TRUE	TRUE	FALSE	FALSE	FALSE
XUT1072	TRUE	FALSE	FALSE	FALSE	FALSE
XUT0191	TRUE	TRUE	FALSE	FALSE	FALSE
XUT1074	TRUE	TRUE	FALSE	FALSE	FALSE
XUT1075	TRUE	TRUE	FALSE	FALSE	FALSE
XUT1076	TRUE	TRUE	FALSE	FALSE	FALSE
XUT1077	TRUE	TRUE	FALSE	FALSE	FALSE
XUT1078	TRUE	TRUE	FALSE	FALSE	FALSE
XUT0192	FALSE	TRUE	FALSE	FALSE	FALSE
XUT0193	TRUE	TRUE	TRUE	TRUE	TRUE
XUT1079	TRUE	TRUE	TRUE	TRUE	FALSE
XUT1080	TRUE	TRUE	FALSE	FALSE	FALSE
XUT1081	TRUE	TRUE	FALSE	FALSE	FALSE
XUT0195	TRUE	TRUE	TRUE	TRUE	TRUE
XUT0197	TRUE	FALSE	FALSE	FALSE	FALSE
XUT1083	FALSE	FALSE	TRUE	TRUE	TRUE
XUT1084	FALSE	TRUE	FALSE	FALSE	FALSE
XUT0198	TRUE	TRUE	TRUE	TRUE	FALSE
XUT1085	TRUE	TRUE	FALSE	FALSE	FALSE
XUT1086	TRUE	TRUE	TRUE	TRUE	TRUE
XUT0199	TRUE	FALSE	FALSE	FALSE	FALSE
XUT0200	TRUE	TRUE	FALSE	FALSE	FALSE
XUT1087	FALSE	TRUE	FALSE	FALSE	FALSE
XUT1088	FALSE	FALSE	FALSE	FALSE	FALSE
XUT0201	TRUE	TRUE	TRUE	FALSE	FALSE
XUT0202	TRUE	TRUE	TRUE	TRUE	TRUE
XUT0203	TRUE	TRUE	TRUE	TRUE	FALSE
XUT0204	TRUE	TRUE	TRUE	TRUE	TRUE
XUT1089	FALSE	TRUE	FALSE	TRUE	TRUE
XUT0207	TRUE	FALSE	FALSE	FALSE	FALSE
XUT1091	FALSE	TRUE	FALSE	FALSE	FALSE
XUT0208	FALSE	TRUE	FALSE	FALSE	FALSE
XUT0209	TRUE	TRUE	TRUE	TRUE	TRUE
XUT1092	TRUE	TRUE	TRUE	TRUE	TRUE
XUT0210	TRUE	TRUE	TRUE	TRUE	TRUE
XUT0211	TRUE	TRUE	FALSE	FALSE	FALSE
XUT0212	TRUE	TRUE	TRUE	TRUE	FALSE
XUT0213	FALSE	TRUE	TRUE	TRUE	TRUE
XUT0214	FALSE	TRUE	FALSE	FALSE	FALSE
XUT1093	TRUE	FALSE	FALSE	FALSE	FALSE
XUT1094	TRUE	TRUE	TRUE	TRUE	TRUE
XUT1095	TRUE	TRUE	TRUE	TRUE	TRUE
XUT1096	FALSE	TRUE	TRUE	TRUE	FALSE
XUT1097	TRUE	TRUE	FALSE	FALSE	FALSE
XUT1098	TRUE	TRUE	FALSE	FALSE	FALSE
XUT0216	TRUE	TRUE	FALSE	TRUE	FALSE
XUT0217	TRUE	TRUE	FALSE	TRUE	TRUE
XUT0218	TRUE	TRUE	FALSE	FALSE	FALSE
XUT0219	TRUE	TRUE	FALSE	FALSE	FALSE
XUT0220	FALSE	TRUE	TRUE	FALSE	FALSE
XUT0221	FALSE	FALSE	FALSE	FALSE	FALSE
XUT0222	FALSE	TRUE	FALSE	FALSE	FALSE
XUT0223	FALSE	TRUE	TRUE	TRUE	TRUE
XUT1099	TRUE	TRUE	FALSE	FALSE	FALSE
XUT0224	TRUE	TRUE	TRUE	FALSE	FALSE
XUT0226	TRUE	TRUE	TRUE	TRUE	TRUE
XUT1100	FALSE	FALSE	FALSE	FALSE	FALSE
XUT1101	TRUE	TRUE	TRUE	TRUE	TRUE
XUT0228	TRUE	TRUE	FALSE	FALSE	FALSE
XUT0229	FALSE	TRUE	FALSE	FALSE	FALSE
XUT0230	TRUE	TRUE	FALSE	FALSE	FALSE
XUT1102	FALSE	TRUE	FALSE	FALSE	FALSE
XUT1103	TRUE	TRUE	TRUE	TRUE	TRUE
XUT1104	TRUE	TRUE	FALSE	TRUE	TRUE
XUT0231	TRUE	TRUE	FALSE	FALSE	FALSE
XUT0232	TRUE	TRUE	TRUE	TRUE	FALSE
XUT1105	TRUE	TRUE	TRUE	TRUE	TRUE
XUT1106	TRUE	TRUE	TRUE	TRUE	TRUE
XUT0233	FALSE	TRUE	TRUE	TRUE	TRUE
XUT1107	TRUE	TRUE	FALSE	TRUE	TRUE
XUT1108	TRUE	TRUE	TRUE	TRUE	TRUE
XUT1109	FALSE	TRUE	TRUE	TRUE	TRUE
XUT1110	FALSE	TRUE	FALSE	FALSE	FALSE
XUT0234	TRUE	TRUE	FALSE	FALSE	FALSE
XUT1111	FALSE	TRUE	FALSE	FALSE	FALSE
XUT1112	TRUE	TRUE	FALSE	FALSE	FALSE
XUT0235	TRUE	TRUE	TRUE	TRUE	FALSE
XUT0236	TRUE	TRUE	FALSE	FALSE	FALSE
XUT0237	TRUE	TRUE	FALSE	FALSE	FALSE
XUT0238	TRUE	TRUE	TRUE	TRUE	FALSE
XUT1113	TRUE	TRUE	TRUE	TRUE	TRUE
XUT0239	TRUE	TRUE	TRUE	FALSE	FALSE
XUT0240	TRUE	TRUE	TRUE	TRUE	TRUE
XUT0241	FALSE	TRUE	FALSE	FALSE	FALSE
XUT0242	FALSE	TRUE	FALSE	FALSE	FALSE
XUT0243	TRUE	TRUE	FALSE	FALSE	FALSE
XUT0244	TRUE	TRUE	TRUE	TRUE	FALSE
XUT1114	TRUE	TRUE	TRUE	FALSE	FALSE
XUT0245	TRUE	TRUE	FALSE	FALSE	FALSE
XUT0246	TRUE	TRUE	TRUE	FALSE	FALSE
XUT0247	FALSE	TRUE	FALSE	FALSE	FALSE
XUT0248	FALSE	TRUE	FALSE	FALSE	FALSE
XUT1115	FALSE	TRUE	FALSE	FALSE	FALSE
XUT1116	TRUE	TRUE	FALSE	FALSE	FALSE
XUT1117	TRUE	TRUE	TRUE	TRUE	TRUE
XUT0249	TRUE	TRUE	FALSE	FALSE	FALSE
XUT1118	TRUE	TRUE	TRUE	TRUE	FALSE
XUT0250	TRUE	TRUE	TRUE	TRUE	FALSE
XUT0251	TRUE	TRUE	FALSE	TRUE	FALSE
XUT0252	TRUE	TRUE	TRUE	TRUE	FALSE
XUT0253	TRUE	TRUE	TRUE	TRUE	TRUE
XUT0254	TRUE	TRUE	TRUE	TRUE	TRUE
XUT0255	TRUE	TRUE	TRUE	TRUE	TRUE
XUT1119	TRUE	FALSE	FALSE	FALSE	FALSE
XUT1120	FALSE	FALSE	FALSE	FALSE	FALSE
XUT0256	TRUE	FALSE	FALSE	FALSE	FALSE
XUT1121	TRUE	TRUE	TRUE	TRUE	TRUE
XUT1122	TRUE	TRUE	TRUE	TRUE	FALSE
XUT0257	TRUE	TRUE	TRUE	TRUE	TRUE
XUT0258	TRUE	TRUE	TRUE	FALSE	FALSE
XUT1123	FALSE	TRUE	FALSE	FALSE	FALSE
XUT0260	TRUE	TRUE	FALSE	FALSE	FALSE
XUT0261	TRUE	TRUE	FALSE	TRUE	TRUE
XUT0262	TRUE	TRUE	TRUE	FALSE	FALSE
XUT1124	TRUE	TRUE	FALSE	TRUE	TRUE
XUT1125	TRUE	TRUE	TRUE	TRUE	FALSE
XUT0263	TRUE	FALSE	FALSE	FALSE	FALSE
XUT1126	TRUE	TRUE	TRUE	TRUE	FALSE
XUT0264	TRUE	TRUE	TRUE	TRUE	TRUE
XUT1127	TRUE	TRUE	FALSE	FALSE	FALSE
XUT1128	TRUE	TRUE	TRUE	TRUE	TRUE
XUT0266	TRUE	TRUE	FALSE	FALSE	FALSE
XUT1129	TRUE	TRUE	TRUE	TRUE	TRUE
XUT0267	TRUE	TRUE	FALSE	FALSE	FALSE
XUT1130	TRUE	TRUE	TRUE	TRUE	TRUE
XUT1131	TRUE	TRUE	FALSE	FALSE	FALSE
XUT0268	TRUE	TRUE	TRUE	TRUE	FALSE
XUT0269	TRUE	TRUE	FALSE	FALSE	FALSE
XUT0270	TRUE	TRUE	FALSE	FALSE	FALSE
XUT0271	TRUE	TRUE	TRUE	TRUE	TRUE
XUT1132	TRUE	FALSE	FALSE	FALSE	FALSE
XUT1133	FALSE	FALSE	TRUE	TRUE	TRUE
XUT1134	TRUE	TRUE	TRUE	TRUE	TRUE
XUT1135	FALSE	TRUE	FALSE	FALSE	FALSE
XUT1136	TRUE	TRUE	TRUE	TRUE	TRUE
XUT0272	FALSE	TRUE	FALSE	TRUE	TRUE
XUT0273	TRUE	TRUE	FALSE	FALSE	FALSE
XUT0274	TRUE	TRUE	FALSE	FALSE	FALSE
XUT1137	TRUE	TRUE	TRUE	TRUE	TRUE
XUT0275	TRUE	TRUE	TRUE	TRUE	TRUE
XUT1138	FALSE	TRUE	TRUE	FALSE	FALSE
XUT0276	TRUE	TRUE	TRUE	TRUE	TRUE
XUT0277	TRUE	TRUE	TRUE	FALSE	FALSE
XUT0278	TRUE	TRUE	FALSE	FALSE	FALSE
XUT1139	TRUE	TRUE	TRUE	TRUE	TRUE
XUT0279	TRUE	TRUE	TRUE	TRUE	TRUE
XUT0280	TRUE	TRUE	TRUE	TRUE	TRUE
XUT0281	TRUE	TRUE	TRUE	TRUE	TRUE
XUT0282	TRUE	TRUE	TRUE	TRUE	TRUE
XUT1140	TRUE	TRUE	TRUE	TRUE	TRUE
XUT1141	FALSE	TRUE	FALSE	FALSE	FALSE
XUT1142	FALSE	TRUE	FALSE	FALSE	FALSE
XUT1143	TRUE	TRUE	FALSE	FALSE	FALSE
XUT1144	FALSE	TRUE	TRUE	FALSE	FALSE
XUT0283	TRUE	TRUE	TRUE	TRUE	FALSE
XUT0284	TRUE	TRUE	TRUE	TRUE	TRUE
XUT0285	TRUE	TRUE	TRUE	TRUE	FALSE
XUT1146	TRUE	TRUE	TRUE	TRUE	TRUE
XUT0287	TRUE	TRUE	FALSE	FALSE	FALSE
XUT0289	TRUE	TRUE	FALSE	FALSE	FALSE
XUT0290	TRUE	TRUE	TRUE	FALSE	FALSE
XUT0291	TRUE	TRUE	TRUE	TRUE	TRUE
XUT0292	TRUE	TRUE	FALSE	FALSE	FALSE
XUT1147	TRUE	TRUE	TRUE	FALSE	FALSE
XUT1148	TRUE	TRUE	TRUE	TRUE	TRUE
XUT0293	TRUE	TRUE	TRUE	FALSE	FALSE
XUT0294	TRUE	TRUE	FALSE	FALSE	FALSE
XUT0295	TRUE	TRUE	FALSE	FALSE	FALSE
XUT1149	FALSE	TRUE	FALSE	FALSE	FALSE
XUT0296	FALSE	TRUE	FALSE	FALSE	FALSE
XUT1150	TRUE	TRUE	TRUE	TRUE	TRUE
XUT0297	FALSE	TRUE	TRUE	TRUE	FALSE
XUT0298	FALSE	FALSE	FALSE	FALSE	FALSE
XUT1153	FALSE	TRUE	FALSE	FALSE	FALSE
XUT0299	FALSE	TRUE	TRUE	FALSE	FALSE
XUT0300	TRUE	TRUE	FALSE	FALSE	FALSE
XUT1154	FALSE	TRUE	FALSE	FALSE	FALSE
XUT1155	TRUE	TRUE	FALSE	FALSE	FALSE
XUT0301	FALSE	TRUE	FALSE	FALSE	FALSE
XUT0302	FALSE	TRUE	TRUE	TRUE	TRUE
XUT1156	TRUE	TRUE	TRUE	TRUE	TRUE
XUT0303	FALSE	FALSE	FALSE	FALSE	FALSE
XUT1158	TRUE	TRUE	FALSE	FALSE	FALSE
XUT0304	FALSE	FALSE	TRUE	FALSE	FALSE
XUT1159	TRUE	TRUE	FALSE	FALSE	FALSE
XUT1160	TRUE	TRUE	TRUE	FALSE	FALSE
XUT1161	TRUE	TRUE	FALSE	FALSE	FALSE
XUT1162	TRUE	TRUE	FALSE	TRUE	FALSE
XUT1163	TRUE	TRUE	TRUE	TRUE	TRUE
XUT0305	TRUE	TRUE	TRUE	TRUE	TRUE
XUT1164	FALSE	FALSE	FALSE	FALSE	FALSE
XUT1165	TRUE	TRUE	TRUE	FALSE	FALSE
XUT1166	TRUE	TRUE	FALSE	FALSE	FALSE
XUT1167	TRUE	TRUE	FALSE	FALSE	FALSE
XUT1168	TRUE	TRUE	FALSE	FALSE	FALSE
XUT1169	TRUE	TRUE	TRUE	TRUE	FALSE
XUT0307	TRUE	TRUE	FALSE	FALSE	FALSE
XUT0308	TRUE	TRUE	TRUE	FALSE	FALSE
XUT0309	TRUE	TRUE	FALSE	FALSE	FALSE
XUT1170	TRUE	TRUE	TRUE	TRUE	TRUE
XUT0310	TRUE	TRUE	TRUE	TRUE	TRUE
XUT0311	TRUE	TRUE	TRUE	TRUE	TRUE
XUT1171	TRUE	TRUE	TRUE	TRUE	TRUE
XUT0312	TRUE	TRUE	FALSE	FALSE	FALSE
XUT0313	TRUE	TRUE	FALSE	FALSE	FALSE
XUT1172	TRUE	TRUE	TRUE	TRUE	TRUE
XUT0314	TRUE	TRUE	FALSE	FALSE	FALSE
XUT0315	FALSE	TRUE	FALSE	FALSE	FALSE
XUT1173	TRUE	TRUE	FALSE	FALSE	FALSE
XUT0316	TRUE	TRUE	TRUE	TRUE	TRUE
XUT1174	TRUE	TRUE	FALSE	FALSE	FALSE
XUT1176	TRUE	TRUE	FALSE	FALSE	FALSE
XUT0317	TRUE	TRUE	FALSE	FALSE	FALSE
XUT1177	TRUE	TRUE	TRUE	TRUE	TRUE
XUT0319	TRUE	TRUE	FALSE	FALSE	FALSE
XUT0320	TRUE	TRUE	FALSE	FALSE	FALSE
XUT1178	TRUE	TRUE	TRUE	FALSE	FALSE
XUT0321	TRUE	TRUE	FALSE	FALSE	FALSE
XUT1179	TRUE	TRUE	FALSE	FALSE	FALSE
XUT0322	TRUE	FALSE	FALSE	FALSE	FALSE
XUT0323	TRUE	TRUE	TRUE	FALSE	FALSE
XUT1181	TRUE	TRUE	TRUE	TRUE	TRUE
XUT1182	TRUE	TRUE	FALSE	FALSE	FALSE
XUT0324	TRUE	TRUE	TRUE	FALSE	FALSE
XUT1185	TRUE	TRUE	FALSE	FALSE	FALSE
XUT0325	TRUE	TRUE	FALSE	FALSE	FALSE
XUT1186	TRUE	TRUE	TRUE	TRUE	TRUE
XUT1187	TRUE	TRUE	FALSE	FALSE	FALSE
XUT1188	TRUE	TRUE	FALSE	FALSE	FALSE
XUT1189	TRUE	TRUE	FALSE	FALSE	FALSE
XUT1190	TRUE	TRUE	TRUE	TRUE	FALSE
XUT0326	TRUE	TRUE	TRUE	TRUE	TRUE
XUT1191	TRUE	TRUE	TRUE	TRUE	TRUE
XUT1192	TRUE	TRUE	FALSE	FALSE	FALSE
XUT1193	TRUE	TRUE	FALSE	FALSE	FALSE
XUT1194	TRUE	TRUE	FALSE	FALSE	FALSE
XUT0327	TRUE	TRUE	TRUE	TRUE	FALSE
XUT1195	FALSE	TRUE	TRUE	TRUE	TRUE
XUT1196	TRUE	TRUE	FALSE	FALSE	FALSE
XUT1197	TRUE	TRUE	FALSE	FALSE	FALSE
XUT0328	TRUE	TRUE	FALSE	FALSE	FALSE
XUT1198	FALSE	FALSE	FALSE	TRUE	TRUE
XUT1199	TRUE	TRUE	TRUE	FALSE	FALSE
XUT1200	TRUE	TRUE	FALSE	FALSE	FALSE
XUT1201	TRUE	TRUE	FALSE	FALSE	FALSE
XUT0331	TRUE	TRUE	TRUE	FALSE	FALSE
XUT1202	TRUE	TRUE	TRUE	FALSE	FALSE
XUT0332	FALSE	TRUE	FALSE	TRUE	TRUE
XUT0333	TRUE	TRUE	TRUE	TRUE	TRUE
XUT0334	FALSE	TRUE	TRUE	TRUE	TRUE
XUT0335	TRUE	TRUE	TRUE	TRUE	FALSE
XUT1203	TRUE	TRUE	FALSE	FALSE	FALSE
XUT0336	FALSE	FALSE	FALSE	FALSE	FALSE
XUT1204	FALSE	FALSE	FALSE	FALSE	FALSE
XUT0337	FALSE	TRUE	FALSE	FALSE	FALSE
XUT1205	TRUE	TRUE	TRUE	TRUE	FALSE
XUT1206	TRUE	TRUE	TRUE	TRUE	FALSE
XUT1207	TRUE	TRUE	TRUE	TRUE	TRUE
XUT1208	FALSE	TRUE	FALSE	TRUE	TRUE
XUT0338	FALSE	TRUE	TRUE	TRUE	FALSE
XUT1209	TRUE	TRUE	TRUE	TRUE	TRUE
XUT1210	TRUE	TRUE	TRUE	FALSE	FALSE
XUT0339	TRUE	TRUE	TRUE	TRUE	TRUE
XUT1211	TRUE	TRUE	TRUE	TRUE	FALSE
XUT1212	FALSE	TRUE	TRUE	TRUE	FALSE
XUT0340	TRUE	TRUE	TRUE	TRUE	TRUE
XUT1213	TRUE	TRUE	TRUE	FALSE	FALSE
XUT1214	TRUE	TRUE	FALSE	FALSE	FALSE
XUT1215	TRUE	TRUE	FALSE	FALSE	FALSE
XUT1216	TRUE	TRUE	TRUE	TRUE	TRUE
XUT0341	TRUE	FALSE	FALSE	FALSE	FALSE
XUT1219	TRUE	TRUE	FALSE	FALSE	FALSE
XUT0343	TRUE	TRUE	FALSE	FALSE	FALSE
XUT0344	TRUE	TRUE	FALSE	FALSE	FALSE
XUT1221	FALSE	TRUE	FALSE	FALSE	FALSE
XUT1222	TRUE	TRUE	TRUE	TRUE	TRUE
XUT1223	FALSE	TRUE	FALSE	FALSE	FALSE
XUT0345	TRUE	TRUE	TRUE	TRUE	FALSE
XUT1224	TRUE	TRUE	FALSE	FALSE	FALSE
XUT1225	TRUE	TRUE	TRUE	TRUE	FALSE
XUT0346	FALSE	TRUE	FALSE	FALSE	FALSE
XUT1227	TRUE	TRUE	FALSE	FALSE	FALSE
XUT0347	TRUE	TRUE	TRUE	TRUE	TRUE
XUT1228	TRUE	TRUE	FALSE	TRUE	TRUE
XUT0348	FALSE	TRUE	TRUE	TRUE	FALSE
XUT0349	TRUE	TRUE	TRUE	FALSE	FALSE
XUT1229	TRUE	TRUE	FALSE	FALSE	FALSE
XUT1230	TRUE	TRUE	TRUE	TRUE	TRUE
XUT1231	TRUE	TRUE	TRUE	FALSE	FALSE
XUT0350	FALSE	TRUE	TRUE	TRUE	FALSE
XUT0351	TRUE	TRUE	FALSE	FALSE	FALSE
XUT0352	TRUE	TRUE	TRUE	TRUE	TRUE
XUT0353	TRUE	TRUE	FALSE	FALSE	FALSE
XUT0354	TRUE	TRUE	FALSE	FALSE	FALSE
XUT1232	TRUE	TRUE	TRUE	TRUE	TRUE
XUT1233	TRUE	TRUE	FALSE	FALSE	FALSE
XUT1234	TRUE	TRUE	TRUE	TRUE	TRUE
XUT1235	FALSE	TRUE	FALSE	FALSE	FALSE
XUT1236	FALSE	TRUE	TRUE	TRUE	TRUE
XUT1237	FALSE	FALSE	FALSE	FALSE	FALSE
XUT1238	TRUE	TRUE	TRUE	TRUE	TRUE
XUT0356	FALSE	FALSE	FALSE	FALSE	FALSE
XUT0357	TRUE	FALSE	FALSE	FALSE	FALSE
XUT1240	TRUE	TRUE	TRUE	TRUE	TRUE
XUT0358	TRUE	FALSE	FALSE	FALSE	FALSE
XUT0359	TRUE	TRUE	FALSE	FALSE	FALSE
XUT1241	FALSE	TRUE	FALSE	FALSE	FALSE
XUT1242	TRUE	TRUE	TRUE	FALSE	FALSE
XUT1243	TRUE	TRUE	TRUE	TRUE	TRUE
XUT1244	TRUE	FALSE	FALSE	FALSE	FALSE
XUT0360	FALSE	TRUE	TRUE	FALSE	FALSE
XUT1245	TRUE	TRUE	FALSE	FALSE	FALSE
XUT0361	TRUE	TRUE	FALSE	FALSE	FALSE
XUT0362	TRUE	TRUE	FALSE	FALSE	FALSE
XUT0363	TRUE	TRUE	FALSE	FALSE	FALSE
XUT1246	FALSE	TRUE	FALSE	FALSE	FALSE
XUT0364	FALSE	TRUE	FALSE	FALSE	FALSE
XUT0365	TRUE	TRUE	TRUE	TRUE	TRUE
XUT1247	FALSE	TRUE	FALSE	FALSE	FALSE
XUT1248	TRUE	TRUE	FALSE	FALSE	FALSE
XUT1249	TRUE	TRUE	FALSE	FALSE	FALSE
XUT1250	TRUE	TRUE	FALSE	FALSE	FALSE
XUT0366	TRUE	TRUE	TRUE	FALSE	FALSE
XUT0367	TRUE	TRUE	TRUE	FALSE	FALSE
XUT0368	FALSE	TRUE	TRUE	TRUE	TRUE
XUT1251	TRUE	TRUE	FALSE	TRUE	TRUE
XUT0369	TRUE	TRUE	TRUE	FALSE	FALSE
XUT1252	TRUE	TRUE	FALSE	FALSE	FALSE
XUT1253	TRUE	TRUE	TRUE	TRUE	TRUE
XUT1254	FALSE	TRUE	FALSE	FALSE	FALSE
XUT1255	TRUE	TRUE	TRUE	TRUE	TRUE
XUT0370	TRUE	TRUE	TRUE	TRUE	TRUE
XUT0371	TRUE	TRUE	TRUE	TRUE	TRUE
XUT0372	TRUE	TRUE	TRUE	TRUE	TRUE
XUT1257	TRUE	TRUE	TRUE	TRUE	FALSE
XUT0373	TRUE	TRUE	FALSE	FALSE	FALSE
XUT0374	TRUE	TRUE	FALSE	FALSE	FALSE
XUT1258	TRUE	TRUE	FALSE	FALSE	FALSE
XUT1260	TRUE	TRUE	FALSE	FALSE	FALSE
XUT0376	TRUE	TRUE	TRUE	TRUE	TRUE
XUT0377	TRUE	TRUE	FALSE	FALSE	FALSE
XUT0378	TRUE	TRUE	FALSE	FALSE	FALSE
XUT0380	FALSE	TRUE	TRUE	FALSE	FALSE
XUT1261	FALSE	TRUE	TRUE	TRUE	FALSE
XUT0381	FALSE	TRUE	FALSE	FALSE	FALSE
XUT1262	TRUE	TRUE	TRUE	TRUE	TRUE
XUT0383	TRUE	FALSE	FALSE	FALSE	FALSE
XUT1264	FALSE	FALSE	TRUE	FALSE	FALSE
XUT0384	TRUE	TRUE	TRUE	TRUE	FALSE
XUT1265	TRUE	TRUE	FALSE	FALSE	FALSE
XUT1266	TRUE	TRUE	TRUE	TRUE	FALSE
XUT0385	FALSE	TRUE	FALSE	FALSE	FALSE
XUT0386	TRUE	TRUE	FALSE	FALSE	FALSE
XUT0387	FALSE	TRUE	TRUE	TRUE	TRUE
XUT0388	TRUE	TRUE	FALSE	FALSE	FALSE
XUT0389	FALSE	TRUE	FALSE	FALSE	FALSE
XUT0390	TRUE	TRUE	FALSE	FALSE	FALSE
XUT1267	FALSE	TRUE	TRUE	TRUE	TRUE
XUT0391	TRUE	TRUE	FALSE	FALSE	FALSE
XUT0392	TRUE	TRUE	FALSE	FALSE	FALSE
XUT1268	FALSE	TRUE	FALSE	FALSE	FALSE
XUT0393	TRUE	TRUE	TRUE	TRUE	FALSE
XUT0394	TRUE	TRUE	TRUE	TRUE	TRUE
XUT1269	FALSE	FALSE	TRUE	FALSE	FALSE
XUT1270	TRUE	TRUE	TRUE	TRUE	TRUE
XUT0395	FALSE	FALSE	FALSE	FALSE	FALSE
XUT0396	TRUE	TRUE	TRUE	TRUE	TRUE
XUT1271	FALSE	TRUE	FALSE	TRUE	TRUE
XUT0397	TRUE	TRUE	TRUE	FALSE	FALSE
XUT0398	FALSE	TRUE	TRUE	TRUE	TRUE
XUT1272	FALSE	TRUE	TRUE	FALSE	FALSE
XUT1273	FALSE	TRUE	FALSE	FALSE	FALSE
XUT1274	TRUE	TRUE	FALSE	FALSE	FALSE
XUT0399	FALSE	TRUE	FALSE	FALSE	FALSE
XUT0400	TRUE	TRUE	FALSE	FALSE	FALSE
XUT1275	TRUE	TRUE	FALSE	FALSE	FALSE
XUT0401	FALSE	TRUE	TRUE	FALSE	FALSE
XUT1276	TRUE	TRUE	TRUE	TRUE	TRUE
XUT0403	TRUE	TRUE	FALSE	FALSE	FALSE
XUT0404	FALSE	TRUE	FALSE	FALSE	FALSE
XUT0405	TRUE	TRUE	TRUE	FALSE	FALSE
XUT1277	TRUE	TRUE	TRUE	TRUE	TRUE
XUT0406	TRUE	TRUE	FALSE	FALSE	FALSE
XUT0407	TRUE	TRUE	FALSE	FALSE	FALSE
XUT1278	TRUE	TRUE	FALSE	FALSE	FALSE
XUT0408	TRUE	TRUE	TRUE	FALSE	FALSE
XUT1279	FALSE	TRUE	FALSE	FALSE	FALSE
XUT0409	TRUE	TRUE	TRUE	TRUE	TRUE
XUT0410	TRUE	TRUE	FALSE	FALSE	FALSE
XUT0411	TRUE	TRUE	TRUE	FALSE	FALSE
XUT1280	FALSE	FALSE	FALSE	FALSE	FALSE
XUT0412	FALSE	FALSE	TRUE	FALSE	FALSE
XUT1281	TRUE	TRUE	TRUE	TRUE	TRUE
XUT1282	FALSE	TRUE	FALSE	FALSE	FALSE
XUT1283	TRUE	TRUE	TRUE	TRUE	TRUE
XUT0414	TRUE	TRUE	TRUE	TRUE	FALSE
XUT0415	TRUE	TRUE	FALSE	FALSE	FALSE
XUT0416	TRUE	TRUE	FALSE	FALSE	FALSE
XUT0417	TRUE	TRUE	FALSE	FALSE	FALSE
XUT0418	TRUE	TRUE	TRUE	TRUE	TRUE
XUT0419	TRUE	TRUE	FALSE	FALSE	FALSE
XUT0420	TRUE	TRUE	TRUE	TRUE	TRUE
XUT0423	TRUE	TRUE	FALSE	FALSE	FALSE
XUT1284	TRUE	TRUE	FALSE	FALSE	FALSE
XUT0425	TRUE	TRUE	FALSE	FALSE	FALSE
XUT1286	TRUE	TRUE	TRUE	TRUE	FALSE
XUT0427	TRUE	TRUE	FALSE	FALSE	FALSE
XUT0428	TRUE	TRUE	TRUE	TRUE	TRUE
XUT1287	TRUE	TRUE	TRUE	TRUE	TRUE
XUT1288	TRUE	TRUE	FALSE	FALSE	FALSE
XUT0429	TRUE	TRUE	FALSE	FALSE	FALSE
XUT0430	TRUE	TRUE	TRUE	TRUE	TRUE
XUT1289	TRUE	TRUE	TRUE	TRUE	TRUE
XUT0431	FALSE	TRUE	TRUE	TRUE	FALSE
XUT0433	TRUE	TRUE	TRUE	TRUE	TRUE
XUT0434	TRUE	TRUE	FALSE	FALSE	FALSE
XUT0436	FALSE	TRUE	TRUE	TRUE	TRUE
XUT1290	FALSE	TRUE	FALSE	FALSE	FALSE
XUT1291	TRUE	TRUE	FALSE	FALSE	FALSE
XUT0437	FALSE	FALSE	TRUE	TRUE	FALSE
XUT0438	TRUE	FALSE	FALSE	FALSE	FALSE
XUT1292	TRUE	TRUE	TRUE	TRUE	TRUE
XUT0439	TRUE	TRUE	TRUE	TRUE	TRUE
XUT0440	TRUE	TRUE	TRUE	TRUE	TRUE
XUT1293	TRUE	TRUE	FALSE	FALSE	FALSE
XUT1294	FALSE	TRUE	TRUE	TRUE	FALSE
XUT1295	TRUE	TRUE	FALSE	FALSE	FALSE
XUT0441	TRUE	TRUE	FALSE	FALSE	FALSE
XUT1296	FALSE	TRUE	TRUE	TRUE	TRUE
XUT1297	FALSE	TRUE	TRUE	FALSE	FALSE
XUT0442	TRUE	TRUE	FALSE	FALSE	FALSE
XUT1299	TRUE	TRUE	FALSE	FALSE	FALSE
XUT1300	TRUE	TRUE	TRUE	TRUE	TRUE
XUT0443	FALSE	TRUE	FALSE	FALSE	FALSE
XUT0444	FALSE	TRUE	FALSE	FALSE	FALSE
XUT0445	TRUE	TRUE	FALSE	FALSE	FALSE
XUT0446	TRUE	FALSE	FALSE	FALSE	FALSE
XUT0447	TRUE	TRUE	FALSE	FALSE	FALSE
XUT0448	FALSE	TRUE	FALSE	FALSE	FALSE
XUT1301	TRUE	TRUE	FALSE	FALSE	FALSE
XUT0449	TRUE	TRUE	TRUE	TRUE	FALSE
XUT0450	TRUE	TRUE	TRUE	TRUE	TRUE
XUT0451	TRUE	TRUE	FALSE	FALSE	FALSE
XUT1302	TRUE	TRUE	FALSE	TRUE	TRUE
XUT1303	TRUE	TRUE	TRUE	TRUE	TRUE
XUT1304	TRUE	TRUE	TRUE	TRUE	TRUE
XUT1305	TRUE	FALSE	FALSE	FALSE	FALSE
XUT1306	TRUE	TRUE	TRUE	FALSE	FALSE
XUT1307	TRUE	TRUE	FALSE	FALSE	FALSE
XUT0452	TRUE	TRUE	TRUE	TRUE	TRUE
XUT0453	TRUE	TRUE	TRUE	TRUE	TRUE
XUT0454	TRUE	TRUE	FALSE	FALSE	FALSE
XUT0455	TRUE	TRUE	FALSE	FALSE	FALSE
XUT1308	TRUE	TRUE	TRUE	TRUE	TRUE
XUT0456	TRUE	FALSE	FALSE	FALSE	FALSE
XUT1310	FALSE	TRUE	FALSE	TRUE	FALSE
XUT1311	TRUE	TRUE	TRUE	TRUE	TRUE
XUT1312	TRUE	TRUE	FALSE	FALSE	FALSE
XUT1313	TRUE	TRUE	FALSE	FALSE	FALSE
XUT1314	TRUE	TRUE	TRUE	TRUE	TRUE
XUT1315	TRUE	TRUE	TRUE	TRUE	TRUE
XUT1316	TRUE	TRUE	TRUE	TRUE	FALSE
XUT1317	TRUE	TRUE	FALSE	FALSE	FALSE
XUT0457	TRUE	TRUE	FALSE	FALSE	FALSE
XUT1318	FALSE	TRUE	FALSE	FALSE	FALSE
XUT1319	TRUE	TRUE	FALSE	TRUE	TRUE
XUT1320	TRUE	TRUE	TRUE	FALSE	FALSE
XUT1321	FALSE	TRUE	FALSE	FALSE	FALSE
XUT1323	TRUE	TRUE	TRUE	TRUE	FALSE
XUT1325	TRUE	TRUE	FALSE	FALSE	FALSE
XUT0458	TRUE	TRUE	FALSE	FALSE	FALSE
XUT1326	TRUE	TRUE	FALSE	FALSE	FALSE
XUT0459	TRUE	FALSE	FALSE	FALSE	FALSE
XUT0460	TRUE	TRUE	FALSE	FALSE	FALSE
XUT0461	TRUE	TRUE	FALSE	FALSE	FALSE
XUT1328	TRUE	TRUE	FALSE	FALSE	FALSE
XUT1329	TRUE	FALSE	FALSE	FALSE	FALSE
XUT1330	TRUE	TRUE	FALSE	FALSE	FALSE
XUT0462	FALSE	TRUE	FALSE	FALSE	FALSE
XUT0463	TRUE	TRUE	FALSE	FALSE	FALSE
XUT0464	TRUE	FALSE	FALSE	FALSE	FALSE
XUT1332	TRUE	TRUE	TRUE	FALSE	FALSE
XUT1333	TRUE	TRUE	FALSE	FALSE	FALSE
XUT1334	TRUE	TRUE	FALSE	FALSE	FALSE
XUT0466	TRUE	TRUE	FALSE	TRUE	TRUE
XUT0467	TRUE	TRUE	TRUE	TRUE	TRUE
XUT1335	FALSE	FALSE	TRUE	TRUE	FALSE
XUT0468	TRUE	TRUE	TRUE	TRUE	TRUE
XUT0469	TRUE	TRUE	TRUE	TRUE	TRUE
XUT0470	TRUE	TRUE	FALSE	FALSE	FALSE
XUT0471	TRUE	TRUE	TRUE	TRUE	TRUE
XUT1336	FALSE	TRUE	TRUE	TRUE	TRUE
XUT0472	FALSE	FALSE	FALSE	FALSE	FALSE
XUT0473	FALSE	FALSE	FALSE	FALSE	FALSE
XUT0474	TRUE	TRUE	TRUE	FALSE	FALSE
XUT0475	TRUE	TRUE	FALSE	FALSE	FALSE
XUT0476	TRUE	TRUE	FALSE	TRUE	TRUE
XUT0477	FALSE	TRUE	FALSE	FALSE	FALSE
XUT1337	FALSE	TRUE	TRUE	FALSE	FALSE
XUT1338	TRUE	TRUE	FALSE	TRUE	TRUE
XUT1339	TRUE	TRUE	TRUE	FALSE	FALSE
XUT1340	TRUE	TRUE	TRUE	TRUE	TRUE
XUT0478	TRUE	TRUE	TRUE	FALSE	FALSE
XUT1341	TRUE	TRUE	TRUE	TRUE	TRUE
XUT0479	TRUE	TRUE	TRUE	TRUE	TRUE
XUT0480	FALSE	TRUE	FALSE	FALSE	FALSE
XUT1342	TRUE	TRUE	TRUE	TRUE	TRUE
XUT0481	FALSE	TRUE	FALSE	FALSE	FALSE
XUT0482	FALSE	TRUE	TRUE	TRUE	TRUE
XUT1343	TRUE	TRUE	FALSE	FALSE	FALSE
XUT0484	TRUE	TRUE	TRUE	FALSE	FALSE
XUT0486	FALSE	TRUE	FALSE	FALSE	FALSE
XUT0487	TRUE	TRUE	FALSE	FALSE	FALSE
XUT0488	TRUE	TRUE	TRUE	TRUE	TRUE
XUT0489	TRUE	TRUE	FALSE	FALSE	FALSE
XUT1344	FALSE	TRUE	TRUE	FALSE	FALSE
XUT0490	FALSE	TRUE	TRUE	FALSE	FALSE
XUT1345	TRUE	TRUE	TRUE	TRUE	TRUE
XUT1346	TRUE	TRUE	FALSE	FALSE	FALSE
XUT0491	TRUE	TRUE	TRUE	TRUE	TRUE
XUT0492	TRUE	TRUE	FALSE	FALSE	FALSE
XUT0493	FALSE	TRUE	FALSE	FALSE	FALSE
XUT0494	TRUE	TRUE	TRUE	TRUE	TRUE
XUT0495	TRUE	TRUE	FALSE	FALSE	FALSE
XUT0496	TRUE	TRUE	FALSE	FALSE	FALSE
XUT1347	TRUE	FALSE	FALSE	FALSE	FALSE
XUT1348	TRUE	TRUE	TRUE	TRUE	FALSE
XUT0497	TRUE	TRUE	FALSE	FALSE	FALSE
XUT0498	TRUE	TRUE	FALSE	FALSE	FALSE
XUT1349	TRUE	TRUE	FALSE	FALSE	FALSE
XUT0499	FALSE	TRUE	TRUE	TRUE	TRUE
XUT0500	FALSE	TRUE	FALSE	FALSE	FALSE
XUT0501	FALSE	TRUE	FALSE	FALSE	FALSE
XUT0502	TRUE	TRUE	FALSE	FALSE	FALSE
XUT1350	TRUE	TRUE	FALSE	FALSE	FALSE
XUT1352	TRUE	TRUE	TRUE	TRUE	FALSE
XUT0503	TRUE	TRUE	FALSE	FALSE	FALSE
XUT0504	TRUE	TRUE	TRUE	FALSE	FALSE
XUT1353	TRUE	TRUE	FALSE	TRUE	TRUE
XUT0505	TRUE	TRUE	FALSE	TRUE	FALSE
XUT0506	TRUE	TRUE	TRUE	TRUE	TRUE
XUT1354	TRUE	TRUE	TRUE	TRUE	TRUE
XUT0507	TRUE	FALSE	FALSE	FALSE	FALSE
XUT1355	TRUE	TRUE	FALSE	FALSE	FALSE
XUT1356	FALSE	FALSE	FALSE	FALSE	FALSE
XUT0510	TRUE	TRUE	TRUE	TRUE	FALSE
XUT0511	TRUE	TRUE	TRUE	FALSE	FALSE
XUT0512	TRUE	TRUE	TRUE	TRUE	FALSE
XUT0513	FALSE	TRUE	FALSE	FALSE	FALSE
XUT0514	TRUE	TRUE	FALSE	FALSE	FALSE
XUT1357	TRUE	TRUE	FALSE	FALSE	FALSE
XUT0515	FALSE	TRUE	FALSE	TRUE	TRUE
XUT0516	FALSE	TRUE	FALSE	FALSE	FALSE
XUT0517	TRUE	TRUE	TRUE	TRUE	TRUE
XUT0518	TRUE	TRUE	FALSE	FALSE	FALSE
XUT0519	TRUE	TRUE	FALSE	FALSE	FALSE
XUT1358	TRUE	TRUE	FALSE	FALSE	FALSE
XUT1359	TRUE	TRUE	TRUE	TRUE	TRUE
XUT0520	TRUE	TRUE	TRUE	FALSE	FALSE
XUT0521	TRUE	TRUE	TRUE	FALSE	FALSE
XUT1360	TRUE	TRUE	TRUE	FALSE	FALSE
XUT0522	TRUE	TRUE	TRUE	TRUE	TRUE
XUT0523	TRUE	TRUE	FALSE	TRUE	TRUE
XUT1361	TRUE	TRUE	FALSE	FALSE	FALSE
XUT1362	TRUE	TRUE	FALSE	FALSE	FALSE
XUT0524	TRUE	TRUE	TRUE	FALSE	FALSE
XUT0525	FALSE	TRUE	FALSE	FALSE	FALSE
XUT0526	FALSE	TRUE	FALSE	FALSE	FALSE
XUT0527	TRUE	TRUE	TRUE	FALSE	FALSE
XUT0530	TRUE	TRUE	FALSE	TRUE	TRUE
XUT1363	TRUE	TRUE	TRUE	TRUE	TRUE
XUT1364	TRUE	TRUE	FALSE	FALSE	FALSE
XUT1365	TRUE	TRUE	FALSE	FALSE	FALSE
XUT1366	TRUE	TRUE	FALSE	FALSE	FALSE
XUT1367	FALSE	TRUE	FALSE	FALSE	FALSE
XUT0531	TRUE	TRUE	FALSE	FALSE	FALSE
XUT0532	TRUE	TRUE	FALSE	FALSE	FALSE
XUT1368	FALSE	TRUE	TRUE	TRUE	FALSE
XUT1369	TRUE	TRUE	TRUE	TRUE	TRUE
XUT1371	TRUE	TRUE	FALSE	FALSE	FALSE
XUT1372	TRUE	TRUE	FALSE	FALSE	FALSE
XUT0533	TRUE	TRUE	TRUE	TRUE	FALSE
XUT0534	TRUE	TRUE	FALSE	FALSE	FALSE
XUT1373	TRUE	TRUE	FALSE	FALSE	FALSE
XUT0535	TRUE	TRUE	TRUE	TRUE	TRUE
XUT1374	TRUE	TRUE	FALSE	FALSE	FALSE
XUT1375	TRUE	TRUE	TRUE	TRUE	FALSE
XUT1376	TRUE	TRUE	FALSE	FALSE	FALSE
XUT1377	TRUE	TRUE	FALSE	FALSE	FALSE
XUT1378	TRUE	TRUE	FALSE	FALSE	FALSE
XUT0536	TRUE	TRUE	TRUE	TRUE	TRUE
XUT1379	TRUE	TRUE	TRUE	FALSE	FALSE
XUT1380	TRUE	TRUE	FALSE	FALSE	FALSE
XUT0537	TRUE	TRUE	FALSE	FALSE	FALSE
XUT0538	TRUE	TRUE	FALSE	FALSE	FALSE
XUT0539	TRUE	TRUE	FALSE	FALSE	FALSE
XUT1381	TRUE	TRUE	FALSE	FALSE	FALSE
XUT0540	FALSE	TRUE	TRUE	FALSE	FALSE
XUT1382	TRUE	TRUE	FALSE	FALSE	FALSE
XUT1383	TRUE	TRUE	TRUE	TRUE	TRUE
XUT0541	TRUE	TRUE	TRUE	TRUE	TRUE
XUT0542	TRUE	TRUE	FALSE	FALSE	FALSE
XUT1384	TRUE	TRUE	TRUE	TRUE	FALSE
XUT0543	TRUE	TRUE	TRUE	FALSE	FALSE
XUT0544	FALSE	TRUE	TRUE	TRUE	FALSE
XUT1385	FALSE	TRUE	FALSE	FALSE	FALSE
XUT1386	TRUE	TRUE	FALSE	TRUE	FALSE
XUT1387	FALSE	FALSE	FALSE	FALSE	FALSE
XUT1388	FALSE	FALSE	FALSE	FALSE	FALSE
XUT1389	TRUE	TRUE	FALSE	FALSE	FALSE
XUT1390	FALSE	FALSE	FALSE	FALSE	FALSE
XUT1391	FALSE	FALSE	TRUE	FALSE	FALSE
XUT1392	TRUE	TRUE	TRUE	TRUE	TRUE
XUT1393	TRUE	TRUE	FALSE	TRUE	TRUE
XUT0549	TRUE	TRUE	FALSE	FALSE	FALSE
XUT1394	FALSE	TRUE	FALSE	FALSE	FALSE
XUT0550	TRUE	TRUE	FALSE	FALSE	FALSE
XUT1395	TRUE	TRUE	FALSE	FALSE	FALSE
XUT1396	TRUE	TRUE	TRUE	TRUE	TRUE
XUT1397	TRUE	TRUE	TRUE	TRUE	TRUE
XUT1398	FALSE	TRUE	TRUE	TRUE	FALSE
XUT1399	TRUE	TRUE	FALSE	FALSE	FALSE
XUT1400	TRUE	TRUE	FALSE	FALSE	FALSE
XUT1402	FALSE	FALSE	FALSE	FALSE	FALSE
XUT1403	TRUE	TRUE	TRUE	TRUE	FALSE
XUT1404	TRUE	TRUE	FALSE	FALSE	FALSE
XUT1405	TRUE	TRUE	TRUE	FALSE	FALSE
XUT0551	FALSE	TRUE	FALSE	FALSE	FALSE
XUT0552	TRUE	TRUE	FALSE	FALSE	FALSE
XUT1406	TRUE	TRUE	TRUE	FALSE	FALSE
XUT0553	TRUE	TRUE	FALSE	TRUE	FALSE
XUT1407	TRUE	TRUE	FALSE	FALSE	FALSE
XUT1408	TRUE	TRUE	FALSE	FALSE	FALSE
XUT1409	TRUE	TRUE	TRUE	TRUE	FALSE
XUT0554	TRUE	TRUE	FALSE	FALSE	FALSE
XUT0555	TRUE	TRUE	FALSE	FALSE	FALSE
XUT1410	TRUE	TRUE	FALSE	FALSE	FALSE
XUT1411	TRUE	TRUE	TRUE	TRUE	FALSE
XUT0556	TRUE	TRUE	FALSE	TRUE	TRUE
XUT1412	TRUE	TRUE	TRUE	TRUE	TRUE
XUT1413	TRUE	TRUE	FALSE	FALSE	FALSE
XUT0557	TRUE	TRUE	FALSE	FALSE	FALSE
XUT0558	TRUE	TRUE	FALSE	FALSE	FALSE
XUT0559	TRUE	TRUE	FALSE	FALSE	FALSE
XUT1414	TRUE	TRUE	FALSE	FALSE	FALSE
XUT0560	TRUE	TRUE	FALSE	FALSE	FALSE
XUT1415	TRUE	TRUE	TRUE	TRUE	TRUE
XUT0561	TRUE	TRUE	TRUE	FALSE	FALSE
XUT0562	TRUE	FALSE	FALSE	FALSE	FALSE
XUT0563	FALSE	TRUE	FALSE	FALSE	FALSE
XUT0564	TRUE	TRUE	FALSE	FALSE	FALSE
XUT0565	FALSE	TRUE	FALSE	FALSE	FALSE
XUT0566	TRUE	TRUE	TRUE	TRUE	TRUE
XUT1416	TRUE	TRUE	TRUE	FALSE	FALSE
XUT1417	TRUE	TRUE	TRUE	TRUE	TRUE
XUT0567	TRUE	TRUE	TRUE	TRUE	TRUE
XUT0568	TRUE	TRUE	FALSE	FALSE	FALSE
XUT0569	FALSE	TRUE	FALSE	TRUE	TRUE
XUT0570	TRUE	TRUE	TRUE	TRUE	FALSE
XUT0571	TRUE	FALSE	FALSE	FALSE	FALSE
XUT0572	TRUE	TRUE	FALSE	FALSE	FALSE
XUT1418	FALSE	FALSE	FALSE	FALSE	FALSE
XUT1419	FALSE	FALSE	TRUE	FALSE	FALSE
XUT1420	FALSE	FALSE	FALSE	FALSE	FALSE
XUT1421	FALSE	FALSE	FALSE	FALSE	FALSE
XUT0573	FALSE	FALSE	FALSE	FALSE	FALSE
XUT0574	TRUE	TRUE	TRUE	TRUE	TRUE
XUT0575	TRUE	TRUE	TRUE	TRUE	TRUE
XUT1423	TRUE	TRUE	FALSE	FALSE	FALSE
XUT1424	TRUE	TRUE	FALSE	FALSE	FALSE
XUT0576	FALSE	TRUE	TRUE	FALSE	FALSE
XUT1425	FALSE	FALSE	FALSE	FALSE	FALSE
XUT0577	TRUE	TRUE	TRUE	TRUE	TRUE
XUT0578	FALSE	TRUE	TRUE	TRUE	TRUE
XUT0579	TRUE	TRUE	TRUE	TRUE	TRUE
XUT0580	TRUE	TRUE	TRUE	TRUE	TRUE
XUT1426	TRUE	TRUE	TRUE	TRUE	TRUE
XUT1427	TRUE	TRUE	FALSE	FALSE	FALSE
XUT1428	TRUE	TRUE	FALSE	FALSE	FALSE
XUT0581	TRUE	FALSE	FALSE	FALSE	FALSE
XUT0582	TRUE	TRUE	TRUE	FALSE	FALSE
XUT0583	TRUE	TRUE	FALSE	FALSE	FALSE
XUT1429	FALSE	FALSE	TRUE	FALSE	FALSE
XUT1430	TRUE	TRUE	TRUE	TRUE	TRUE
XUT0584	TRUE	TRUE	FALSE	FALSE	FALSE
XUT0585	TRUE	TRUE	FALSE	FALSE	FALSE
XUT1431	FALSE	TRUE	FALSE	FALSE	FALSE
XUT1432	TRUE	TRUE	FALSE	FALSE	FALSE
XUT0586	FALSE	TRUE	TRUE	TRUE	TRUE
XUT1433	TRUE	TRUE	TRUE	TRUE	TRUE
XUT0587	FALSE	FALSE	FALSE	FALSE	FALSE
XUT0588	FALSE	TRUE	FALSE	FALSE	FALSE
XUT1434	TRUE	TRUE	TRUE	TRUE	TRUE
XUT0589	FALSE	FALSE	FALSE	FALSE	FALSE
XUT1435	FALSE	TRUE	FALSE	FALSE	FALSE
XUT1436	FALSE	TRUE	FALSE	FALSE	FALSE
XUT1437	FALSE	FALSE	FALSE	FALSE	FALSE
XUT1438	TRUE	TRUE	TRUE	TRUE	TRUE
XUT1439	FALSE	FALSE	FALSE	FALSE	FALSE
XUT1440	FALSE	TRUE	FALSE	FALSE	FALSE
XUT1441	TRUE	TRUE	FALSE	FALSE	FALSE
XUT1442	TRUE	TRUE	FALSE	FALSE	FALSE
XUT0590	TRUE	TRUE	FALSE	FALSE	FALSE
XUT1443	TRUE	TRUE	FALSE	FALSE	FALSE
XUT1444	TRUE	TRUE	FALSE	FALSE	FALSE
XUT0591	FALSE	TRUE	FALSE	FALSE	FALSE
XUT1445	FALSE	TRUE	FALSE	FALSE	FALSE
XUT0592	TRUE	TRUE	FALSE	FALSE	FALSE
XUT1446	FALSE	TRUE	TRUE	FALSE	FALSE
XUT0593	FALSE	TRUE	TRUE	TRUE	TRUE
XUT0594	TRUE	TRUE	TRUE	TRUE	TRUE
XUT1448	FALSE	TRUE	FALSE	FALSE	FALSE
XUT0595	TRUE	TRUE	TRUE	FALSE	FALSE
XUT0596	TRUE	TRUE	TRUE	FALSE	FALSE
XUT0597	TRUE	TRUE	TRUE	TRUE	FALSE
XUT0598	TRUE	TRUE	TRUE	TRUE	TRUE
XUT1450	TRUE	TRUE	FALSE	FALSE	FALSE
XUT0599	TRUE	TRUE	TRUE	TRUE	TRUE
XUT0600	FALSE	TRUE	TRUE	TRUE	FALSE
XUT0601	TRUE	FALSE	FALSE	FALSE	FALSE
XUT1451	FALSE	FALSE	FALSE	FALSE	FALSE
XUT1452	TRUE	TRUE	TRUE	TRUE	TRUE
XUT1453	TRUE	TRUE	FALSE	FALSE	FALSE
XUT0602	TRUE	TRUE	TRUE	TRUE	TRUE
XUT1454	FALSE	TRUE	FALSE	TRUE	TRUE
XUT1455	FALSE	TRUE	FALSE	FALSE	FALSE
XUT0603	FALSE	TRUE	TRUE	TRUE	FALSE
XUT0604	FALSE	TRUE	FALSE	FALSE	FALSE
XUT0605	FALSE	TRUE	TRUE	FALSE	FALSE
XUT1456	TRUE	TRUE	FALSE	FALSE	FALSE
XUT0606	FALSE	FALSE	FALSE	FALSE	FALSE
XUT1457	TRUE	TRUE	FALSE	FALSE	FALSE
XUT0607	TRUE	TRUE	FALSE	FALSE	FALSE
XUT0608	TRUE	TRUE	FALSE	FALSE	FALSE
XUT1458	TRUE	TRUE	TRUE	FALSE	FALSE
XUT1459	FALSE	TRUE	FALSE	FALSE	FALSE
XUT1460	TRUE	FALSE	FALSE	FALSE	FALSE
XUT0609	FALSE	TRUE	TRUE	TRUE	FALSE
XUT1462	FALSE	TRUE	TRUE	TRUE	TRUE
XUT1463	TRUE	TRUE	FALSE	FALSE	FALSE
XUT1464	TRUE	TRUE	FALSE	FALSE	FALSE
XUT1465	TRUE	TRUE	TRUE	TRUE	TRUE
XUT1466	FALSE	FALSE	FALSE	FALSE	FALSE
XUT0610	TRUE	TRUE	TRUE	TRUE	TRUE
XUT0611	TRUE	TRUE	TRUE	TRUE	FALSE
XUT1467	TRUE	TRUE	TRUE	TRUE	TRUE
XUT0612	TRUE	TRUE	FALSE	FALSE	FALSE
XUT1468	TRUE	TRUE	FALSE	FALSE	FALSE
XUT1469	TRUE	TRUE	FALSE	FALSE	FALSE
XUT0613	TRUE	TRUE	TRUE	FALSE	FALSE
XUT1470	TRUE	TRUE	TRUE	TRUE	FALSE
XUT0614	TRUE	TRUE	TRUE	TRUE	TRUE
XUT1471	TRUE	TRUE	TRUE	TRUE	TRUE
XUT1472	TRUE	TRUE	FALSE	FALSE	FALSE
XUT0616	TRUE	TRUE	TRUE	TRUE	TRUE
XUT0617	TRUE	TRUE	FALSE	FALSE	FALSE
XUT1473	TRUE	TRUE	FALSE	FALSE	FALSE
XUT0618	TRUE	TRUE	TRUE	TRUE	TRUE
XUT0619	TRUE	TRUE	FALSE	FALSE	FALSE
XUT0620	FALSE	TRUE	TRUE	TRUE	FALSE
XUT0621	FALSE	TRUE	FALSE	FALSE	FALSE
XUT0622	TRUE	TRUE	FALSE	FALSE	FALSE
XUT1474	TRUE	TRUE	TRUE	FALSE	FALSE
XUT0624	TRUE	TRUE	FALSE	FALSE	FALSE
XUT0625	TRUE	FALSE	FALSE	FALSE	FALSE
XUT0626	TRUE	TRUE	TRUE	TRUE	FALSE
XUT0627	TRUE	TRUE	TRUE	FALSE	FALSE
XUT0628	TRUE	TRUE	TRUE	TRUE	FALSE
XUT0629	TRUE	TRUE	FALSE	FALSE	FALSE
XUT0630	TRUE	TRUE	TRUE	TRUE	FALSE
XUT0631	FALSE	TRUE	TRUE	FALSE	FALSE
XUT0632	TRUE	TRUE	TRUE	FALSE	FALSE
XUT0633	TRUE	TRUE	FALSE	FALSE	FALSE
XUT1478	TRUE	TRUE	FALSE	FALSE	FALSE
XUT0634	TRUE	TRUE	TRUE	TRUE	TRUE
XUT0635	FALSE	TRUE	FALSE	FALSE	FALSE
XUT0636	TRUE	TRUE	FALSE	FALSE	FALSE
XUT1479	TRUE	TRUE	TRUE	TRUE	TRUE
XUT0638	FALSE	TRUE	TRUE	FALSE	FALSE
XUT0639	TRUE	TRUE	FALSE	FALSE	FALSE
XUT0640	FALSE	TRUE	FALSE	FALSE	FALSE
XUT1480	TRUE	TRUE	TRUE	TRUE	FALSE
XUT1481	TRUE	TRUE	FALSE	FALSE	FALSE
XUT0643	TRUE	TRUE	TRUE	TRUE	TRUE
XUT0644	TRUE	TRUE	TRUE	TRUE	TRUE
XUT0645	TRUE	TRUE	TRUE	TRUE	FALSE
XUT1482	TRUE	TRUE	FALSE	FALSE	FALSE
XUT0646	TRUE	TRUE	FALSE	FALSE	FALSE
XUT0647	FALSE	TRUE	FALSE	FALSE	FALSE
XUT1483	TRUE	TRUE	TRUE	FALSE	FALSE
XUT0648	TRUE	TRUE	TRUE	FALSE	FALSE
XUT1484	TRUE	FALSE	FALSE	FALSE	FALSE
XUT0649	TRUE	FALSE	TRUE	TRUE	TRUE
XUT0650	FALSE	FALSE	FALSE	FALSE	FALSE
XUT0651	FALSE	TRUE	FALSE	FALSE	FALSE
XUT0652	FALSE	FALSE	FALSE	FALSE	FALSE
XUT0653	TRUE	TRUE	TRUE	TRUE	TRUE
XUT1486	TRUE	TRUE	TRUE	TRUE	TRUE
XUT0654	FALSE	TRUE	FALSE	TRUE	TRUE
XUT0655	TRUE	TRUE	FALSE	TRUE	TRUE
XUT0656	FALSE	TRUE	FALSE	FALSE	FALSE
XUT1488	FALSE	FALSE	FALSE	FALSE	FALSE
XUT1489	TRUE	TRUE	TRUE	TRUE	TRUE
XUT0660	TRUE	TRUE	FALSE	FALSE	FALSE
XUT1490	TRUE	TRUE	FALSE	FALSE	FALSE
XUT1491	TRUE	TRUE	TRUE	FALSE	FALSE
XUT1492	FALSE	TRUE	TRUE	TRUE	TRUE
XUT1493	TRUE	TRUE	FALSE	FALSE	FALSE
XUT1494	TRUE	TRUE	FALSE	FALSE	FALSE
XUT1496	TRUE	TRUE	TRUE	TRUE	TRUE
XUT1497	FALSE	TRUE	TRUE	FALSE	FALSE
XUT0661	FALSE	TRUE	FALSE	FALSE	FALSE
XUT1498	TRUE	FALSE	TRUE	TRUE	TRUE
XUT1499	FALSE	FALSE	FALSE	FALSE	FALSE
XUT1500	FALSE	TRUE	TRUE	TRUE	TRUE
XUT0663	FALSE	TRUE	FALSE	FALSE	FALSE
XUT1501	TRUE	TRUE	TRUE	TRUE	FALSE
XUT0664	FALSE	TRUE	FALSE	TRUE	TRUE
XUT1502	TRUE	TRUE	TRUE	FALSE	FALSE
XUT0665	TRUE	TRUE	TRUE	TRUE	TRUE
XUT1503	TRUE	TRUE	TRUE	FALSE	FALSE
XUT1505	TRUE	TRUE	FALSE	FALSE	FALSE
XUT0667	TRUE	TRUE	TRUE	FALSE	FALSE
XUT1506	FALSE	TRUE	FALSE	FALSE	FALSE
XUT1507	TRUE	TRUE	TRUE	TRUE	TRUE
XUT1508	TRUE	TRUE	FALSE	FALSE	FALSE
XUT0668	TRUE	TRUE	FALSE	FALSE	FALSE
XUT1509	FALSE	FALSE	FALSE	FALSE	FALSE
XUT0669	FALSE	TRUE	FALSE	FALSE	FALSE
XUT1510	TRUE	TRUE	TRUE	TRUE	TRUE
XUT1511	FALSE	FALSE	TRUE	TRUE	TRUE
XUT1512	FALSE	FALSE	TRUE	FALSE	FALSE
XUT1513	TRUE	TRUE	TRUE	TRUE	TRUE
XUT0670	TRUE	TRUE	TRUE	TRUE	FALSE
XUT0671	TRUE	TRUE	TRUE	TRUE	TRUE
XUT0672	TRUE	TRUE	FALSE	FALSE	FALSE
XUT0673	TRUE	TRUE	TRUE	TRUE	TRUE
XUT1514	FALSE	TRUE	TRUE	TRUE	TRUE
XUT1515	TRUE	TRUE	TRUE	TRUE	TRUE
XUT1516	TRUE	TRUE	FALSE	FALSE	FALSE
XUT0674	TRUE	TRUE	FALSE	FALSE	FALSE
XUT1517	FALSE	TRUE	FALSE	FALSE	FALSE
XUT1518	FALSE	FALSE	FALSE	FALSE	FALSE
XUT1519	TRUE	FALSE	FALSE	FALSE	FALSE
XUT1520	TRUE	TRUE	TRUE	TRUE	FALSE
XUT1521	FALSE	TRUE	FALSE	TRUE	FALSE
XUT1522	TRUE	TRUE	FALSE	FALSE	FALSE
XUT0676	TRUE	FALSE	FALSE	FALSE	FALSE
XUT1523	FALSE	TRUE	TRUE	TRUE	TRUE
XUT0677	FALSE	TRUE	FALSE	FALSE	FALSE
XUT0678	TRUE	TRUE	FALSE	FALSE	FALSE
XUT1524	FALSE	TRUE	FALSE	FALSE	FALSE
XUT1525	TRUE	TRUE	TRUE	TRUE	TRUE
XUT1526	TRUE	TRUE	TRUE	TRUE	TRUE
XUT1527	TRUE	TRUE	FALSE	FALSE	FALSE
XUT1528	TRUE	TRUE	TRUE	FALSE	FALSE
XUT0679	TRUE	TRUE	TRUE	TRUE	TRUE
XUT1529	TRUE	TRUE	FALSE	FALSE	FALSE
XUT1530	TRUE	TRUE	TRUE	FALSE	FALSE
XUT1532	TRUE	FALSE	FALSE	FALSE	FALSE
XUT1533	TRUE	FALSE	FALSE	FALSE	FALSE
XUT1534	FALSE	FALSE	FALSE	FALSE	FALSE
XUT1535	TRUE	TRUE	TRUE	FALSE	FALSE
XUT0680	TRUE	TRUE	TRUE	FALSE	FALSE
XUT0681	TRUE	TRUE	FALSE	FALSE	FALSE
XUT0682	TRUE	TRUE	FALSE	FALSE	FALSE
XUT0683	TRUE	TRUE	FALSE	FALSE	FALSE
XUT1536	TRUE	TRUE	TRUE	TRUE	TRUE
XUT0684	TRUE	TRUE	TRUE	TRUE	TRUE
XUT0685	TRUE	TRUE	FALSE	FALSE	FALSE
XUT0686	TRUE	TRUE	FALSE	FALSE	FALSE
XUT1537	TRUE	TRUE	FALSE	TRUE	TRUE
XUT0687	TRUE	TRUE	TRUE	TRUE	TRUE
XUT0688	TRUE	TRUE	TRUE	TRUE	TRUE
XUT0689	TRUE	TRUE	TRUE	TRUE	FALSE
XUT0690	TRUE	TRUE	FALSE	FALSE	FALSE
XUT1538	FALSE	TRUE	TRUE	TRUE	FALSE
XUT0692	TRUE	TRUE	TRUE	TRUE	TRUE
XUT1539	TRUE	TRUE	TRUE	TRUE	FALSE
XUT1540	TRUE	FALSE	FALSE	FALSE	FALSE
XUT1541	TRUE	TRUE	FALSE	FALSE	FALSE
XUT1542	FALSE	FALSE	FALSE	FALSE	FALSE
XUT1543	FALSE	FALSE	TRUE	FALSE	FALSE
XUT1544	FALSE	FALSE	FALSE	FALSE	FALSE
XUT1545	TRUE	TRUE	FALSE	FALSE	FALSE
XUT0696	TRUE	TRUE	FALSE	FALSE	FALSE
XUT1546	TRUE	TRUE	FALSE	FALSE	FALSE
XUT0697	FALSE	TRUE	FALSE	FALSE	FALSE
XUT1547	FALSE	FALSE	TRUE	TRUE	TRUE
XUT1548	TRUE	FALSE	FALSE	FALSE	FALSE
XUT1549	TRUE	TRUE	TRUE	FALSE	FALSE
XUT1550	TRUE	TRUE	TRUE	TRUE	FALSE
XUT1551	FALSE	FALSE	FALSE	FALSE	FALSE
XUT1552	TRUE	TRUE	FALSE	FALSE	FALSE
XUT1553	FALSE	TRUE	TRUE	TRUE	FALSE
XUT1554	TRUE	TRUE	TRUE	TRUE	FALSE
XUT1555	TRUE	FALSE	FALSE	FALSE	FALSE
XUT0698	TRUE	TRUE	FALSE	FALSE	FALSE
XUT0699	TRUE	TRUE	TRUE	FALSE	FALSE
XUT0700	TRUE	TRUE	FALSE	FALSE	FALSE
XUT1556	FALSE	TRUE	TRUE	TRUE	TRUE
XUT1557	TRUE	TRUE	FALSE	FALSE	FALSE
XUT0701	TRUE	TRUE	FALSE	TRUE	TRUE
XUT1558	TRUE	TRUE	FALSE	TRUE	TRUE
XUT0702	FALSE	TRUE	TRUE	TRUE	FALSE
XUT0703	FALSE	TRUE	FALSE	FALSE	FALSE
XUT1559	FALSE	TRUE	FALSE	FALSE	FALSE
XUT1560	TRUE	FALSE	FALSE	FALSE	FALSE
XUT0704	TRUE	TRUE	FALSE	FALSE	FALSE
XUT0705	TRUE	TRUE	TRUE	TRUE	FALSE
XUT0706	FALSE	FALSE	FALSE	FALSE	FALSE
XUT1564	FALSE	FALSE	TRUE	FALSE	FALSE
XUT0707	FALSE	TRUE	TRUE	TRUE	FALSE
XUT0708	FALSE	TRUE	FALSE	FALSE	FALSE
XUT0709	TRUE	TRUE	TRUE	FALSE	FALSE
XUT1565	TRUE	TRUE	TRUE	TRUE	TRUE
XUT1566	TRUE	TRUE	FALSE	FALSE	FALSE
XUT1567	TRUE	TRUE	TRUE	TRUE	TRUE
XUT1568	TRUE	FALSE	FALSE	FALSE	FALSE
XUT1569	TRUE	FALSE	FALSE	FALSE	FALSE
XUT0710	TRUE	TRUE	TRUE	TRUE	TRUE
XUT1570	TRUE	TRUE	FALSE	TRUE	TRUE
XUT0712	TRUE	TRUE	TRUE	TRUE	TRUE
XUT0713	FALSE	FALSE	TRUE	FALSE	FALSE
XUT1571	FALSE	TRUE	FALSE	FALSE	FALSE
XUT0716	FALSE	TRUE	FALSE	FALSE	FALSE
XUT0717	FALSE	TRUE	TRUE	TRUE	TRUE
XUT0718	TRUE	TRUE	TRUE	TRUE	TRUE
XUT0719	TRUE	TRUE	FALSE	FALSE	FALSE
XUT1572	TRUE	TRUE	TRUE	TRUE	FALSE
XUT1573	TRUE	TRUE	FALSE	FALSE	FALSE
XUT0720	FALSE	TRUE	FALSE	TRUE	TRUE
XUT0721	TRUE	TRUE	FALSE	FALSE	FALSE
XUT0722	TRUE	TRUE	TRUE	FALSE	FALSE
XUT1574	TRUE	TRUE	TRUE	FALSE	FALSE
XUT1575	TRUE	TRUE	FALSE	FALSE	FALSE
XUT0723	TRUE	TRUE	FALSE	FALSE	FALSE
XUT0724	FALSE	TRUE	FALSE	FALSE	FALSE
XUT0725	TRUE	TRUE	FALSE	FALSE	FALSE
XUT0726	FALSE	TRUE	FALSE	TRUE	TRUE
XUT0727	TRUE	TRUE	TRUE	TRUE	TRUE
XUT1576	FALSE	FALSE	FALSE	FALSE	FALSE
XUT1577	TRUE	TRUE	TRUE	TRUE	TRUE
XUT1578	TRUE	TRUE	TRUE	FALSE	FALSE
XUT1579	TRUE	TRUE	FALSE	FALSE	FALSE
XUT1581	TRUE	TRUE	FALSE	FALSE	FALSE
XUT1582	TRUE	TRUE	TRUE	TRUE	TRUE
XUT0729	FALSE	FALSE	FALSE	FALSE	FALSE
XUT1583	TRUE	FALSE	TRUE	FALSE	FALSE
XUT1584	TRUE	TRUE	FALSE	FALSE	FALSE
XUT1585	FALSE	TRUE	TRUE	FALSE	FALSE
XUT1586	TRUE	TRUE	FALSE	FALSE	FALSE
XUT1587	TRUE	TRUE	TRUE	FALSE	FALSE
XUT0730	TRUE	TRUE	TRUE	FALSE	FALSE
XUT1588	TRUE	TRUE	TRUE	FALSE	FALSE
XUT1589	TRUE	TRUE	TRUE	FALSE	FALSE
XUT0731	TRUE	TRUE	TRUE	TRUE	TRUE
XUT0732	TRUE	TRUE	TRUE	TRUE	TRUE
XUT1590	TRUE	TRUE	TRUE	TRUE	TRUE
XUT0733	TRUE	TRUE	TRUE	TRUE	TRUE
XUT1591	TRUE	TRUE	TRUE	TRUE	TRUE
XUT1592	TRUE	TRUE	TRUE	TRUE	TRUE
XUT0735	FALSE	TRUE	TRUE	TRUE	TRUE
XUT0737	TRUE	TRUE	FALSE	FALSE	FALSE
XUT1593	TRUE	TRUE	TRUE	FALSE	FALSE
XUT0738	TRUE	TRUE	TRUE	TRUE	TRUE
XUT1594	TRUE	TRUE	FALSE	FALSE	FALSE
XUT0739	TRUE	TRUE	TRUE	TRUE	TRUE
XUT1595	TRUE	TRUE	FALSE	FALSE	FALSE
XUT0740	TRUE	TRUE	TRUE	TRUE	TRUE
XUT1596	TRUE	TRUE	FALSE	FALSE	FALSE
XUT1597	TRUE	TRUE	TRUE	TRUE	FALSE
XUT1598	TRUE	TRUE	TRUE	FALSE	FALSE
XUT0741	TRUE	TRUE	TRUE	TRUE	TRUE
XUT1599	TRUE	FALSE	TRUE	TRUE	TRUE
XUT1600	TRUE	TRUE	FALSE	TRUE	TRUE
XUT0742	TRUE	TRUE	FALSE	FALSE	FALSE
XUT0743	TRUE	TRUE	TRUE	TRUE	FALSE
XUT1602	TRUE	TRUE	FALSE	FALSE	FALSE
XUT0744	FALSE	FALSE	FALSE	FALSE	FALSE
XUT1603	TRUE	TRUE	FALSE	FALSE	FALSE
XUT1604	TRUE	FALSE	FALSE	FALSE	FALSE
XUT0745	TRUE	TRUE	TRUE	TRUE	FALSE
XUT0746	TRUE	TRUE	FALSE	FALSE	FALSE
XUT1605	FALSE	TRUE	FALSE	FALSE	FALSE
XUT0747	FALSE	TRUE	FALSE	FALSE	FALSE
XUT0748	FALSE	TRUE	FALSE	TRUE	FALSE
XUT1607	FALSE	FALSE	FALSE	FALSE	FALSE
XUT1608	FALSE	FALSE	FALSE	FALSE	FALSE
XUT1609	FALSE	TRUE	FALSE	FALSE	FALSE
XUT0749	TRUE	TRUE	FALSE	FALSE	FALSE
XUT0750	FALSE	TRUE	TRUE	TRUE	FALSE
XUT1610	TRUE	TRUE	FALSE	FALSE	FALSE
XUT0751	FALSE	TRUE	TRUE	TRUE	FALSE
XUT1611	FALSE	TRUE	TRUE	TRUE	TRUE
XUT1612	TRUE	TRUE	TRUE	TRUE	TRUE
XUT0752	FALSE	TRUE	FALSE	FALSE	FALSE
XUT1613	TRUE	TRUE	TRUE	TRUE	TRUE
XUT1614	FALSE	TRUE	FALSE	FALSE	FALSE
XUT1615	FALSE	FALSE	FALSE	FALSE	FALSE
XUT0753	TRUE	TRUE	TRUE	TRUE	TRUE
XUT0754	TRUE	TRUE	FALSE	TRUE	FALSE
XUT1616	FALSE	TRUE	TRUE	FALSE	FALSE
XUT1617	TRUE	TRUE	FALSE	FALSE	FALSE
XUT0755	TRUE	TRUE	TRUE	TRUE	TRUE
XUT0756	TRUE	TRUE	FALSE	TRUE	TRUE
XUT1618	TRUE	TRUE	FALSE	FALSE	FALSE
XUT0757	TRUE	TRUE	TRUE	TRUE	TRUE
XUT0758	TRUE	TRUE	TRUE	TRUE	TRUE
XUT0759	TRUE	TRUE	TRUE	TRUE	TRUE
XUT1619	TRUE	TRUE	FALSE	FALSE	FALSE
XUT1620	TRUE	TRUE	FALSE	FALSE	FALSE
XUT1621	TRUE	TRUE	FALSE	FALSE	FALSE
XUT1622	TRUE	TRUE	FALSE	FALSE	FALSE
XUT1623	TRUE	TRUE	TRUE	TRUE	FALSE
XUT0760	TRUE	TRUE	TRUE	TRUE	TRUE
XUT0761	TRUE	TRUE	TRUE	TRUE	TRUE
XUT1624	TRUE	TRUE	FALSE	TRUE	FALSE
XUT1625	TRUE	TRUE	TRUE	FALSE	FALSE
XUT1626	FALSE	TRUE	FALSE	FALSE	FALSE
XUT0762	TRUE	TRUE	FALSE	FALSE	FALSE
XUT1627	TRUE	TRUE	FALSE	FALSE	FALSE
XUT1628	TRUE	TRUE	TRUE	TRUE	FALSE
XUT1629	TRUE	TRUE	TRUE	TRUE	TRUE
XUT1630	TRUE	TRUE	FALSE	FALSE	FALSE
XUT1631	TRUE	TRUE	FALSE	FALSE	FALSE
XUT1632	FALSE	FALSE	FALSE	FALSE	FALSE
XUT1633	FALSE	TRUE	TRUE	FALSE	FALSE
XUT1634	FALSE	FALSE	FALSE	FALSE	FALSE
XUT1635	FALSE	TRUE	TRUE	FALSE	FALSE
XUT0764	TRUE	TRUE	FALSE	FALSE	FALSE
XUT1636	TRUE	FALSE	FALSE	FALSE	FALSE
XUT0765	TRUE	TRUE	FALSE	FALSE	FALSE
XUT1637	FALSE	TRUE	FALSE	FALSE	FALSE
XUT1638	TRUE	TRUE	FALSE	FALSE	FALSE
XUT1639	TRUE	TRUE	TRUE	TRUE	TRUE
XUT1640	FALSE	TRUE	FALSE	FALSE	FALSE
XUT1641	FALSE	TRUE	FALSE	FALSE	FALSE
XUT1642	FALSE	TRUE	FALSE	FALSE	FALSE
XUT1643	TRUE	TRUE	FALSE	FALSE	FALSE
XUT0766	FALSE	TRUE	FALSE	FALSE	FALSE
XUT0767	FALSE	TRUE	TRUE	TRUE	TRUE
XUT1644	FALSE	TRUE	TRUE	FALSE	FALSE
XUT0768	FALSE	TRUE	FALSE	FALSE	FALSE
XUT1646	TRUE	TRUE	TRUE	TRUE	TRUE
XUT0769	FALSE	TRUE	FALSE	FALSE	FALSE
XUT0770	FALSE	TRUE	FALSE	FALSE	FALSE
XUT0772	TRUE	TRUE	TRUE	TRUE	FALSE
XUT1649	TRUE	TRUE	TRUE	FALSE	FALSE
XUT1650	TRUE	TRUE	FALSE	FALSE	FALSE
XUT1651	TRUE	TRUE	TRUE	TRUE	FALSE
XUT0773	TRUE	TRUE	TRUE	TRUE	FALSE
XUT0774	TRUE	TRUE	TRUE	FALSE	FALSE
XUT0775	TRUE	TRUE	FALSE	FALSE	FALSE
XUT0776	TRUE	TRUE	FALSE	FALSE	FALSE
XUT0777	TRUE	TRUE	FALSE	FALSE	FALSE
XUT0778	TRUE	TRUE	TRUE	TRUE	TRUE
XUT1652	TRUE	TRUE	FALSE	FALSE	FALSE
XUT1653	TRUE	TRUE	TRUE	TRUE	FALSE
XUT1654	TRUE	TRUE	TRUE	TRUE	TRUE
XUT0779	FALSE	TRUE	FALSE	FALSE	FALSE
XUT0780	TRUE	TRUE	TRUE	TRUE	TRUE
XUT1655	TRUE	TRUE	TRUE	TRUE	FALSE
XUT0781	TRUE	TRUE	TRUE	TRUE	TRUE
XUT0782	TRUE	TRUE	FALSE	FALSE	FALSE
XUT0783	FALSE	TRUE	TRUE	TRUE	FALSE
XUT0784	TRUE	TRUE	FALSE	FALSE	FALSE
XUT0785	FALSE	FALSE	FALSE	FALSE	FALSE
XUT0786	FALSE	TRUE	TRUE	TRUE	TRUE
XUT1656	TRUE	TRUE	TRUE	TRUE	TRUE
XUT0787	TRUE	TRUE	TRUE	TRUE	TRUE
XUT0788	TRUE	TRUE	FALSE	TRUE	TRUE
XUT1657	TRUE	TRUE	FALSE	FALSE	FALSE
XUT1658	TRUE	TRUE	TRUE	TRUE	TRUE
XUT1659	TRUE	TRUE	FALSE	FALSE	FALSE
XUT0789	TRUE	TRUE	TRUE	FALSE	FALSE
XUT0790	TRUE	TRUE	FALSE	FALSE	FALSE
XUT0791	FALSE	TRUE	TRUE	TRUE	TRUE
XUT1660	TRUE	TRUE	FALSE	FALSE	FALSE
XUT1661	TRUE	TRUE	FALSE	FALSE	FALSE
XUT1662	TRUE	TRUE	FALSE	FALSE	FALSE
XUT1663	TRUE	TRUE	FALSE	FALSE	FALSE
XUT1664	TRUE	TRUE	TRUE	TRUE	TRUE
XUT0793	TRUE	TRUE	TRUE	TRUE	TRUE
XUT1665	TRUE	TRUE	TRUE	TRUE	TRUE
XUT1666	TRUE	TRUE	TRUE	TRUE	FALSE
XUT0794	TRUE	FALSE	FALSE	FALSE	FALSE
XUT1668	TRUE	TRUE	FALSE	FALSE	FALSE
XUT1669	FALSE	TRUE	FALSE	FALSE	FALSE
XUT0795	TRUE	TRUE	FALSE	FALSE	FALSE
XUT0796	FALSE	TRUE	TRUE	FALSE	FALSE
XUT1670	TRUE	TRUE	FALSE	FALSE	FALSE
XUT0797	TRUE	TRUE	TRUE	TRUE	TRUE
XUT1671	TRUE	TRUE	FALSE	FALSE	FALSE
XUT1672	TRUE	TRUE	TRUE	FALSE	FALSE
XUT1673	FALSE	TRUE	FALSE	FALSE	FALSE
XUT1674	FALSE	FALSE	FALSE	FALSE	FALSE
XUT0800	TRUE	TRUE	FALSE	FALSE	FALSE
XUT0801	TRUE	FALSE	FALSE	FALSE	FALSE
XUT1675	FALSE	TRUE	TRUE	TRUE	TRUE
XUT1676	TRUE	TRUE	TRUE	TRUE	TRUE
XUT1677	TRUE	TRUE	FALSE	FALSE	FALSE
XUT1678	TRUE	TRUE	TRUE	TRUE	TRUE
XUT0802	TRUE	TRUE	TRUE	TRUE	TRUE
XUT0803	TRUE	TRUE	TRUE	FALSE	FALSE
XUT0804	TRUE	TRUE	FALSE	FALSE	FALSE
XUT0805	TRUE	TRUE	FALSE	FALSE	FALSE
XUT0806	TRUE	TRUE	TRUE	TRUE	FALSE
XUT1679	TRUE	TRUE	TRUE	FALSE	FALSE
XUT0807	TRUE	TRUE	FALSE	FALSE	FALSE
XUT1680	TRUE	TRUE	FALSE	FALSE	FALSE
XUT0808	TRUE	TRUE	TRUE	TRUE	FALSE
XUT0809	FALSE	TRUE	TRUE	TRUE	TRUE
XUT0810	TRUE	TRUE	FALSE	FALSE	FALSE
XUT1681	TRUE	TRUE	TRUE	TRUE	TRUE
XUT1682	FALSE	TRUE	TRUE	TRUE	TRUE
XUT1683	TRUE	TRUE	TRUE	TRUE	TRUE
XUT0811	TRUE	TRUE	TRUE	FALSE	FALSE
XUT0812	TRUE	TRUE	FALSE	FALSE	FALSE
XUT0813	TRUE	TRUE	TRUE	TRUE	TRUE
XUT1684	TRUE	TRUE	TRUE	TRUE	TRUE
XUT1685	TRUE	TRUE	FALSE	FALSE	FALSE
XUT1686	TRUE	FALSE	FALSE	FALSE	FALSE
XUT1687	TRUE	FALSE	FALSE	FALSE	FALSE
XUT1688	FALSE	TRUE	TRUE	TRUE	TRUE
XUT1690	FALSE	FALSE	FALSE	FALSE	FALSE
XUT0814	TRUE	TRUE	TRUE	TRUE	TRUE
XUT0815	TRUE	TRUE	TRUE	TRUE	TRUE
XUT0816	TRUE	TRUE	TRUE	TRUE	TRUE
XUT1691	TRUE	TRUE	TRUE	TRUE	TRUE
XUT0817	TRUE	TRUE	TRUE	TRUE	TRUE
XUT1692	FALSE	TRUE	FALSE	FALSE	FALSE
XUT1693	TRUE	TRUE	TRUE	TRUE	TRUE
XUT0818	TRUE	TRUE	FALSE	FALSE	FALSE
XUT0819	TRUE	TRUE	TRUE	FALSE	FALSE
XUT1695	FALSE	TRUE	FALSE	FALSE	FALSE
XUT1696	TRUE	TRUE	FALSE	FALSE	FALSE
XUT0820	TRUE	TRUE	TRUE	FALSE	FALSE
XUT1697	TRUE	TRUE	FALSE	FALSE	FALSE
XUT0821	FALSE	TRUE	FALSE	FALSE	FALSE
XUT0822	TRUE	TRUE	TRUE	TRUE	TRUE
XUT1698	FALSE	TRUE	FALSE	FALSE	FALSE
XUT1699	FALSE	TRUE	FALSE	FALSE	FALSE
XUT1700	TRUE	TRUE	FALSE	FALSE	FALSE
XUT1701	TRUE	TRUE	FALSE	FALSE	FALSE
XUT0823	TRUE	TRUE	FALSE	FALSE	FALSE
XUT0824	TRUE	TRUE	FALSE	TRUE	TRUE
XUT1702	TRUE	TRUE	TRUE	TRUE	TRUE
XUT1703	TRUE	FALSE	FALSE	FALSE	FALSE
XUT0826	TRUE	TRUE	TRUE	FALSE	FALSE
XUT0827	TRUE	TRUE	FALSE	FALSE	FALSE
XUT0828	TRUE	TRUE	TRUE	FALSE	FALSE
XUT1704	TRUE	TRUE	TRUE	TRUE	FALSE
XUT1705	TRUE	TRUE	TRUE	TRUE	TRUE
XUT0829	TRUE	TRUE	TRUE	FALSE	FALSE
XUT0830	FALSE	TRUE	TRUE	TRUE	TRUE
XUT0831	FALSE	TRUE	FALSE	FALSE	FALSE
XUT1706	FALSE	TRUE	TRUE	FALSE	FALSE
XUT1707	TRUE	TRUE	TRUE	TRUE	TRUE
XUT0832	TRUE	TRUE	TRUE	TRUE	TRUE
XUT0833	TRUE	TRUE	FALSE	FALSE	FALSE
XUT1709	FALSE	FALSE	FALSE	FALSE	FALSE
XUT1710	TRUE	TRUE	FALSE	FALSE	FALSE
XUT0834	TRUE	TRUE	FALSE	FALSE	FALSE
XUT1711	TRUE	TRUE	TRUE	TRUE	FALSE
XUT1712	FALSE	TRUE	FALSE	FALSE	FALSE
XUT1713	TRUE	TRUE	TRUE	TRUE	FALSE
XUT1714	TRUE	FALSE	FALSE	FALSE	FALSE
XUT1715	TRUE	TRUE	TRUE	FALSE	FALSE
XUT0835	TRUE	TRUE	TRUE	TRUE	FALSE
XUT1716	TRUE	TRUE	TRUE	TRUE	TRUE
XUT0836	FALSE	TRUE	FALSE	FALSE	FALSE
XUT1717	TRUE	TRUE	FALSE	TRUE	TRUE
XUT1718	FALSE	TRUE	FALSE	FALSE	FALSE
XUT1719	TRUE	TRUE	FALSE	FALSE	FALSE
XUT1720	TRUE	TRUE	FALSE	FALSE	FALSE
XUT0837	TRUE	TRUE	FALSE	FALSE	FALSE
XUT0838	TRUE	TRUE	FALSE	FALSE	FALSE
XUT0839	FALSE	FALSE	FALSE	FALSE	FALSE
XUT1721	TRUE	TRUE	TRUE	FALSE	FALSE
XUT0840	TRUE	TRUE	TRUE	FALSE	FALSE
XUT0841	TRUE	TRUE	TRUE	FALSE	FALSE
XUT0842	TRUE	TRUE	TRUE	TRUE	TRUE
XUT1722	TRUE	TRUE	TRUE	TRUE	TRUE
XUT1723	TRUE	FALSE	FALSE	FALSE	FALSE
XUT0844	TRUE	TRUE	TRUE	TRUE	TRUE
XUT1724	TRUE	TRUE	TRUE	TRUE	TRUE
XUT1725	TRUE	FALSE	FALSE	FALSE	FALSE
XUT0845	TRUE	TRUE	TRUE	TRUE	TRUE
XUT1726	FALSE	TRUE	FALSE	FALSE	FALSE
XUT1727	TRUE	TRUE	FALSE	FALSE	FALSE
XUT0846	TRUE	TRUE	TRUE	FALSE	FALSE
XUT0847	FALSE	TRUE	FALSE	FALSE	FALSE
XUT1728	TRUE	TRUE	FALSE	FALSE	FALSE
XUT1729	TRUE	TRUE	FALSE	FALSE	FALSE
XUT0848	TRUE	TRUE	TRUE	FALSE	FALSE
XUT1730	TRUE	TRUE	TRUE	TRUE	TRUE
XUT1731	TRUE	TRUE	FALSE	FALSE	FALSE
XUT1732	TRUE	TRUE	TRUE	FALSE	FALSE
XUT1733	TRUE	TRUE	TRUE	TRUE	TRUE
XUT0849	FALSE	TRUE	FALSE	FALSE	FALSE
XUT0850	FALSE	TRUE	FALSE	FALSE	FALSE
XUT1734	TRUE	TRUE	FALSE	FALSE	FALSE
XUT1735	TRUE	FALSE	FALSE	FALSE	FALSE
XUT1736	TRUE	FALSE	FALSE	FALSE	FALSE
XUT0851	TRUE	FALSE	FALSE	FALSE	FALSE
XUT0852	TRUE	TRUE	FALSE	FALSE	FALSE
XUT0853	TRUE	TRUE	FALSE	FALSE	FALSE
XUT1737	TRUE	TRUE	FALSE	FALSE	FALSE
XUT1738	TRUE	TRUE	TRUE	TRUE	TRUE
XUT1739	FALSE	TRUE	TRUE	TRUE	FALSE
XUT1740	TRUE	TRUE	TRUE	FALSE	FALSE
XUT1741	TRUE	TRUE	TRUE	TRUE	TRUE
XUT1742	FALSE	TRUE	FALSE	FALSE	FALSE
XUT1743	TRUE	TRUE	FALSE	FALSE	FALSE
XUT0854	TRUE	TRUE	TRUE	TRUE	FALSE
XUT0855	TRUE	TRUE	FALSE	FALSE	FALSE
XUT1745	FALSE	FALSE	FALSE	FALSE	FALSE
XUT1746	FALSE	TRUE	TRUE	TRUE	TRUE
XUT1747	TRUE	TRUE	TRUE	TRUE	TRUE
XUT0857	TRUE	TRUE	FALSE	FALSE	FALSE
XUT0858	FALSE	TRUE	FALSE	FALSE	FALSE
XUT0859	FALSE	FALSE	TRUE	FALSE	FALSE
XUT0860	TRUE	TRUE	TRUE	TRUE	TRUE
XUT0861	TRUE	TRUE	TRUE	FALSE	FALSE
XUT0862	TRUE	FALSE	FALSE	FALSE	FALSE
XUT0863	TRUE	TRUE	TRUE	TRUE	TRUE
XUT1748	TRUE	TRUE	FALSE	FALSE	FALSE
XUT1749	FALSE	TRUE	FALSE	FALSE	FALSE
XUT1750	TRUE	TRUE	TRUE	TRUE	TRUE
XUT0864	TRUE	TRUE	FALSE	FALSE	FALSE
XUT0865	FALSE	TRUE	TRUE	TRUE	FALSE
XUT1751	TRUE	TRUE	TRUE	TRUE	FALSE
XUT0867	TRUE	TRUE	TRUE	TRUE	TRUE
XUT1752	FALSE	FALSE	FALSE	FALSE	FALSE
XUT1753	TRUE	TRUE	FALSE	TRUE	FALSE
XUT1754	FALSE	FALSE	FALSE	FALSE	FALSE
XUT1756	TRUE	TRUE	FALSE	FALSE	FALSE
XUT0868	TRUE	TRUE	TRUE	TRUE	TRUE
XUT0869	TRUE	TRUE	TRUE	TRUE	TRUE
XUT0870	TRUE	TRUE	FALSE	TRUE	TRUE
XUT0871	TRUE	TRUE	FALSE	FALSE	FALSE
XUT0872	TRUE	TRUE	FALSE	FALSE	FALSE
XUT0873	TRUE	TRUE	FALSE	TRUE	TRUE
XUT0874	TRUE	TRUE	TRUE	TRUE	TRUE
XUT0875	TRUE	TRUE	TRUE	TRUE	TRUE
XUT0876	FALSE	TRUE	FALSE	FALSE	FALSE
XUT1757	FALSE	TRUE	FALSE	FALSE	FALSE
XUT0877	TRUE	TRUE	TRUE	TRUE	TRUE
XUT0878	TRUE	TRUE	FALSE	FALSE	FALSE
XUT0879	TRUE	TRUE	FALSE	FALSE	FALSE
XUT1758	TRUE	TRUE	TRUE	FALSE	FALSE
XUT0880	FALSE	FALSE	TRUE	TRUE	TRUE
XUT0881	TRUE	TRUE	TRUE	TRUE	FALSE
XUT0882	TRUE	TRUE	TRUE	TRUE	TRUE
XUT1760	TRUE	TRUE	TRUE	FALSE	FALSE
XUT0883	FALSE	TRUE	TRUE	TRUE	TRUE
XUT1761	FALSE	TRUE	TRUE	TRUE	FALSE
XUT0884	TRUE	TRUE	FALSE	FALSE	FALSE
XUT1763	TRUE	TRUE	TRUE	TRUE	TRUE
XUT0885	TRUE	TRUE	TRUE	FALSE	FALSE
XUT0886	FALSE	FALSE	FALSE	TRUE	FALSE
XUT0887	FALSE	TRUE	TRUE	FALSE	FALSE
XUT0888	TRUE	TRUE	FALSE	FALSE	FALSE
XUT1764	TRUE	TRUE	TRUE	FALSE	FALSE
XUT1765	TRUE	TRUE	FALSE	FALSE	FALSE
XUT0890	FALSE	TRUE	FALSE	FALSE	FALSE
XUT1766	FALSE	TRUE	TRUE	TRUE	TRUE
XUT1767	TRUE	TRUE	FALSE	FALSE	FALSE
XUT1768	TRUE	TRUE	FALSE	FALSE	FALSE
XUT1769	TRUE	TRUE	TRUE	TRUE	TRUE
XUT0891	FALSE	TRUE	FALSE	FALSE	FALSE
XUT0892	TRUE	FALSE	TRUE	FALSE	FALSE
XUT0894	TRUE	TRUE	FALSE	FALSE	FALSE
XUT0895	TRUE	TRUE	FALSE	FALSE	FALSE
XUT1770	TRUE	TRUE	FALSE	FALSE	FALSE
XUT0896	FALSE	TRUE	FALSE	FALSE	FALSE
XUT1772	TRUE	TRUE	TRUE	TRUE	TRUE
XUT0897	TRUE	TRUE	TRUE	TRUE	FALSE
XUT1773	TRUE	TRUE	FALSE	FALSE	FALSE
XUT1774	TRUE	TRUE	FALSE	FALSE	FALSE
XUT1775	TRUE	TRUE	FALSE	FALSE	FALSE
XUT0898	TRUE	TRUE	TRUE	FALSE	FALSE
XUT0899	FALSE	TRUE	TRUE	FALSE	FALSE
XUT0900	TRUE	TRUE	FALSE	FALSE	FALSE
XUT0902	FALSE	TRUE	TRUE	FALSE	FALSE
XUT0903	FALSE	TRUE	FALSE	FALSE	FALSE
XUT0904	TRUE	TRUE	TRUE	TRUE	TRUE
XUT1776	TRUE	TRUE	FALSE	TRUE	FALSE
XUT1777	TRUE	TRUE	FALSE	FALSE	FALSE
XUT0905	FALSE	TRUE	FALSE	FALSE	FALSE
XUT0906	TRUE	TRUE	TRUE	TRUE	TRUE
XUT1778	TRUE	TRUE	TRUE	TRUE	TRUE
XUT0907	TRUE	TRUE	TRUE	FALSE	FALSE
XUT1779	TRUE	TRUE	FALSE	FALSE	FALSE
XUT1780	TRUE	TRUE	TRUE	FALSE	FALSE
XUT1781	FALSE	FALSE	FALSE	FALSE	FALSE
XUT0909	TRUE	TRUE	TRUE	TRUE	TRUE
XUT1782	TRUE	TRUE	TRUE	TRUE	TRUE
XUT1783	TRUE	TRUE	TRUE	FALSE	FALSE
XUT1784	TRUE	TRUE	TRUE	TRUE	TRUE
XUT1785	TRUE	TRUE	TRUE	TRUE	TRUE
XUT1786	TRUE	TRUE	FALSE	TRUE	TRUE
XUT0910	TRUE	TRUE	TRUE	TRUE	FALSE
XUT1787	FALSE	FALSE	FALSE	FALSE	FALSE
XUT0911	TRUE	TRUE	TRUE	TRUE	TRUE
XUT0912	FALSE	TRUE	TRUE	TRUE	FALSE
XUT1788	FALSE	FALSE	FALSE	FALSE	FALSE
XUT1789	FALSE	TRUE	TRUE	FALSE	FALSE
XUT1790	TRUE	TRUE	TRUE	TRUE	TRUE
XUT1791	FALSE	TRUE	TRUE	TRUE	FALSE
XUT1792	TRUE	TRUE	FALSE	FALSE	FALSE
XUT1793	TRUE	TRUE	TRUE	TRUE	TRUE
XUT0914	TRUE	TRUE	TRUE	FALSE	FALSE
XUT1794	TRUE	TRUE	TRUE	TRUE	TRUE
XUT1795	TRUE	TRUE	TRUE	FALSE	FALSE
XUT1796	TRUE	TRUE	TRUE	TRUE	FALSE
XUT1797	TRUE	TRUE	TRUE	TRUE	TRUE
XUT1798	TRUE	TRUE	FALSE	FALSE	FALSE
XUT1799	FALSE	TRUE	TRUE	FALSE	FALSE
XUT0915	FALSE	FALSE	FALSE	FALSE	FALSE
XUT0916	TRUE	TRUE	TRUE	TRUE	TRUE
XUT0917	TRUE	TRUE	FALSE	FALSE	FALSE
XUT1802	TRUE	TRUE	TRUE	TRUE	TRUE
XUT0918	TRUE	TRUE	TRUE	TRUE	TRUE
XUT0919	FALSE	TRUE	FALSE	FALSE	FALSE
XUT1803	TRUE	TRUE	TRUE	FALSE	FALSE
XUT1804	FALSE	FALSE	FALSE	FALSE	FALSE
XUT0921	FALSE	FALSE	FALSE	FALSE	FALSE
XUT0922	TRUE	TRUE	TRUE	FALSE	FALSE
XUT0923	FALSE	FALSE	FALSE	FALSE	FALSE
XUT0924	FALSE	TRUE	FALSE	FALSE	FALSE
XUT0925	TRUE	TRUE	TRUE	TRUE	FALSE
XUT1807	TRUE	TRUE	FALSE	TRUE	TRUE
XUT1808	TRUE	TRUE	TRUE	TRUE	TRUE
XUT0926	TRUE	TRUE	TRUE	TRUE	TRUE
XUT1809	TRUE	TRUE	TRUE	TRUE	FALSE
XUT1811	FALSE	FALSE	FALSE	FALSE	FALSE

## Sheet: Translated smORFs
Chr	Start	Stop	Strand	Length (nt)	ORF ID	XUT ID	smORF rank	NMD-sensitive XUT	CHX-sensitive XUT	List 1 - translated smORFs (pooled data)	smORFs detected in WT	smORFs detected in WT-CHX	smORFs detected in upf1	smORFs detected in upf1-CHX	List 2 - smORFs translated in ≥1 condition	List 3 - smORFs translated in ≥1 condition; ≥10 reads/smORF
chr01	3831	3848	-	18	XUT0929_3831_3848_18	XUT0929	3	TRUE	TRUE	FALSE	FALSE	FALSE	FALSE	FALSE	FALSE	FALSE
chr01	3591	3698	-	108	XUT0929_3591_3698_108	XUT0929	6	TRUE	TRUE	FALSE	FALSE	FALSE	FALSE	FALSE	FALSE	FALSE
chr01	3869	3898	-	30	XUT0929_3869_3898_30	XUT0929	2	TRUE	TRUE	FALSE	FALSE	FALSE	FALSE	FALSE	FALSE	FALSE
chr01	3644	3805	-	162	XUT0929_3644_3805_162	XUT0929	4	TRUE	TRUE	FALSE	FALSE	FALSE	FALSE	FALSE	FALSE	FALSE
chr01	4003	4047	-	45	XUT0929_4003_4047_45	XUT0929	1	TRUE	TRUE	FALSE	FALSE	FALSE	FALSE	FALSE	FALSE	FALSE
chr01	3685	3777	-	93	XUT0929_3685_3777_93	XUT0929	5	TRUE	TRUE	FALSE	FALSE	FALSE	FALSE	FALSE	FALSE	FALSE
chr01	4513	4563	-	51	XUT0930_4513_4563_51	XUT0930	2	TRUE	TRUE	FALSE	FALSE	FALSE	FALSE	FALSE	FALSE	FALSE
chr01	4321	4347	-	27	XUT0930_4321_4347_27	XUT0930	4	TRUE	TRUE	FALSE	FALSE	FALSE	FALSE	FALSE	FALSE	FALSE
chr01	4590	4604	-	15	XUT0930_4590_4604_15	XUT0930	1	TRUE	TRUE	FALSE	FALSE	FALSE	FALSE	FALSE	FALSE	FALSE
chr01	4484	4513	-	30	XUT0930_4484_4513_30	XUT0930	3	TRUE	TRUE	FALSE	FALSE	FALSE	FALSE	FALSE	FALSE	FALSE
chr01	6144	6185	-	42	XUT0931_6144_6185_42	XUT0931	3	TRUE	TRUE	FALSE	FALSE	FALSE	FALSE	FALSE	FALSE	FALSE
chr01	5865	6002	-	138	XUT0931_5865_6002_138	XUT0931	6	TRUE	TRUE	FALSE	FALSE	FALSE	FALSE	TRUE	TRUE	FALSE
chr01	5619	5657	-	39	XUT0931_5619_5657_39	XUT0931	11	TRUE	TRUE	FALSE	FALSE	FALSE	FALSE	FALSE	FALSE	FALSE
chr01	5382	5609	-	228	XUT0931_5382_5609_228	XUT0931	13	TRUE	TRUE	FALSE	FALSE	FALSE	FALSE	FALSE	FALSE	FALSE
chr01	5301	5333	-	33	XUT0931_5301_5333_33	XUT0931	16	TRUE	TRUE	FALSE	FALSE	FALSE	FALSE	FALSE	FALSE	FALSE
chr01	5115	5141	-	27	XUT0931_5115_5141_27	XUT0931	18	TRUE	TRUE	FALSE	FALSE	FALSE	FALSE	FALSE	FALSE	FALSE
chr01	5031	5069	-	39	XUT0931_5031_5069_39	XUT0931	19	TRUE	TRUE	FALSE	FALSE	FALSE	FALSE	FALSE	FALSE	FALSE
chr01	6254	6274	-	21	XUT0931_6254_6274_21	XUT0931	1	TRUE	TRUE	FALSE	FALSE	FALSE	FALSE	FALSE	FALSE	FALSE
chr01	6113	6133	-	21	XUT0931_6113_6133_21	XUT0931	4	TRUE	TRUE	FALSE	FALSE	FALSE	FALSE	FALSE	FALSE	FALSE
chr01	6056	6070	-	15	XUT0931_6056_6070_15	XUT0931	5	TRUE	TRUE	FALSE	FALSE	FALSE	FALSE	FALSE	FALSE	FALSE
chr01	5873	5887	-	15	XUT0931_5873_5887_15	XUT0931	7	TRUE	TRUE	FALSE	FALSE	FALSE	FALSE	FALSE	FALSE	FALSE
chr01	5735	5791	-	57	XUT0931_5735_5791_57	XUT0931	8	TRUE	TRUE	FALSE	FALSE	FALSE	FALSE	FALSE	FALSE	FALSE
chr01	5336	5371	-	36	XUT0931_5336_5371_36	XUT0931	15	TRUE	TRUE	FALSE	FALSE	FALSE	FALSE	FALSE	FALSE	FALSE
chr01	5054	5158	-	105	XUT0931_5054_5158_105	XUT0931	17	TRUE	TRUE	FALSE	FALSE	FALSE	FALSE	FALSE	FALSE	FALSE
chr01	6190	6243	-	54	XUT0931_6190_6243_54	XUT0931	2	TRUE	TRUE	FALSE	FALSE	FALSE	FALSE	FALSE	FALSE	FALSE
chr01	5743	5766	-	24	XUT0931_5743_5766_24	XUT0931	9	TRUE	TRUE	FALSE	FALSE	FALSE	FALSE	FALSE	FALSE	FALSE
chr01	5641	5718	-	78	XUT0931_5641_5718_78	XUT0931	10	TRUE	TRUE	FALSE	FALSE	FALSE	FALSE	FALSE	FALSE	FALSE
chr01	5599	5616	-	18	XUT0931_5599_5616_18	XUT0931	12	TRUE	TRUE	FALSE	FALSE	FALSE	FALSE	FALSE	FALSE	FALSE
chr01	5554	5586	-	33	XUT0931_5554_5586_33	XUT0931	14	TRUE	TRUE	FALSE	FALSE	FALSE	FALSE	FALSE	FALSE	FALSE
chr01	9546	9614	+	69	XUT0001_9546_9614_69	XUT0001	1	TRUE	FALSE	TRUE	FALSE	FALSE	TRUE	TRUE	TRUE	TRUE
chr01	9690	9734	+	45	XUT0001_9690_9734_45	XUT0001	4	TRUE	FALSE	FALSE	FALSE	FALSE	FALSE	FALSE	FALSE	FALSE
chr01	9571	9606	+	36	XUT0001_9571_9606_36	XUT0001	2	TRUE	FALSE	TRUE	FALSE	FALSE	TRUE	FALSE	TRUE	TRUE
chr01	9637	9666	+	30	XUT0001_9637_9666_30	XUT0001	3	TRUE	FALSE	FALSE	FALSE	FALSE	FALSE	FALSE	FALSE	FALSE
chr01	9796	9837	+	42	XUT0001_9796_9837_42	XUT0001	6	TRUE	FALSE	FALSE	FALSE	FALSE	FALSE	FALSE	FALSE	FALSE
chr01	9752	9781	+	30	XUT0001_9752_9781_30	XUT0001	5	TRUE	FALSE	FALSE	FALSE	FALSE	FALSE	FALSE	FALSE	FALSE
chr01	23115	23180	-	66	XUT0932_23115_23180_66	XUT0932	1	TRUE	TRUE	FALSE	FALSE	FALSE	FALSE	FALSE	FALSE	FALSE
chr01	23004	23042	-	39	XUT0932_23004_23042_39	XUT0932	3	TRUE	TRUE	FALSE	FALSE	FALSE	FALSE	FALSE	FALSE	FALSE
chr01	22857	22913	-	57	XUT0932_22857_22913_57	XUT0932	5	TRUE	TRUE	FALSE	FALSE	FALSE	FALSE	FALSE	FALSE	FALSE
chr01	23045	23170	-	126	XUT0932_23045_23170_126	XUT0932	2	TRUE	TRUE	FALSE	FALSE	FALSE	FALSE	FALSE	FALSE	FALSE
chr01	22916	23035	-	120	XUT0932_22916_23035_120	XUT0932	4	TRUE	TRUE	FALSE	FALSE	FALSE	FALSE	FALSE	FALSE	FALSE
chr01	24578	24595	+	18	XUT0002_24578_24595_18	XUT0002	3	TRUE	TRUE	FALSE	FALSE	FALSE	FALSE	FALSE	FALSE	FALSE
chr01	24794	24820	+	27	XUT0002_24794_24820_27	XUT0002	4	TRUE	TRUE	FALSE	FALSE	FALSE	FALSE	FALSE	FALSE	FALSE
chr01	24995	25012	+	18	XUT0002_24995_25012_18	XUT0002	6	TRUE	TRUE	FALSE	FALSE	FALSE	FALSE	FALSE	FALSE	FALSE
chr01	25130	25144	+	15	XUT0002_25130_25144_15	XUT0002	8	TRUE	TRUE	FALSE	FALSE	FALSE	FALSE	FALSE	FALSE	FALSE
chr01	25376	25399	+	24	XUT0002_25376_25399_24	XUT0002	9	TRUE	TRUE	FALSE	FALSE	FALSE	FALSE	FALSE	FALSE	FALSE
chr01	24876	24944	+	69	XUT0002_24876_24944_69	XUT0002	5	TRUE	TRUE	FALSE	FALSE	FALSE	FALSE	FALSE	FALSE	FALSE
chr01	24118	24225	+	108	XUT0002_24118_24225_108	XUT0002	1	TRUE	TRUE	FALSE	FALSE	FALSE	FALSE	FALSE	FALSE	FALSE
chr01	24478	24876	+	399	XUT0002_24478_24876_399	XUT0002	2	TRUE	TRUE	FALSE	FALSE	FALSE	FALSE	FALSE	FALSE	FALSE
chr01	25114	25314	+	201	XUT0002_25114_25314_201	XUT0002	7	TRUE	TRUE	FALSE	FALSE	FALSE	FALSE	FALSE	FALSE	FALSE
chr01	25393	25440	+	48	XUT0002_25393_25440_48	XUT0002	10	TRUE	TRUE	FALSE	FALSE	FALSE	FALSE	FALSE	FALSE	FALSE
chr01	25459	25575	+	117	XUT0002_25459_25575_117	XUT0002	11	TRUE	TRUE	FALSE	FALSE	FALSE	FALSE	FALSE	FALSE	FALSE
chr01	27509	27574	+	66	XUT0003_27509_27574_66	XUT0003	4	TRUE	TRUE	FALSE	FALSE	FALSE	FALSE	FALSE	FALSE	FALSE
chr01	27608	27625	+	18	XUT0003_27608_27625_18	XUT0003	5	TRUE	TRUE	FALSE	FALSE	FALSE	FALSE	FALSE	FALSE	FALSE
chr01	27689	27703	+	15	XUT0003_27689_27703_15	XUT0003	6	TRUE	TRUE	FALSE	FALSE	FALSE	FALSE	FALSE	FALSE	FALSE
chr01	27794	27892	+	99	XUT0003_27794_27892_99	XUT0003	7	TRUE	TRUE	FALSE	FALSE	FALSE	FALSE	FALSE	FALSE	FALSE
chr01	28049	28066	+	18	XUT0003_28049_28066_18	XUT0003	10	TRUE	TRUE	FALSE	FALSE	FALSE	FALSE	FALSE	FALSE	FALSE
chr01	28256	28300	+	45	XUT0003_28256_28300_45	XUT0003	11	TRUE	TRUE	FALSE	FALSE	FALSE	FALSE	FALSE	FALSE	FALSE
chr01	28349	28423	+	75	XUT0003_28349_28423_75	XUT0003	13	TRUE	TRUE	FALSE	FALSE	FALSE	FALSE	FALSE	FALSE	FALSE
chr01	27954	28031	+	78	XUT0003_27954_28031_78	XUT0003	9	TRUE	TRUE	FALSE	FALSE	FALSE	FALSE	FALSE	FALSE	FALSE
chr01	28560	28601	+	42	XUT0003_28560_28601_42	XUT0003	15	TRUE	TRUE	FALSE	FALSE	FALSE	FALSE	FALSE	FALSE	FALSE
chr01	28971	28994	+	24	XUT0003_28971_28994_24	XUT0003	18	TRUE	TRUE	FALSE	FALSE	FALSE	FALSE	FALSE	FALSE	FALSE
chr01	27139	27156	+	18	XUT0003_27139_27156_18	XUT0003	1	TRUE	TRUE	FALSE	FALSE	FALSE	FALSE	FALSE	FALSE	FALSE
chr01	27175	27303	+	129	XUT0003_27175_27303_129	XUT0003	2	TRUE	TRUE	FALSE	FALSE	FALSE	FALSE	FALSE	FALSE	FALSE
chr01	27400	27513	+	114	XUT0003_27400_27513_114	XUT0003	3	TRUE	TRUE	FALSE	FALSE	FALSE	FALSE	FALSE	FALSE	FALSE
chr01	27934	27951	+	18	XUT0003_27934_27951_18	XUT0003	8	TRUE	TRUE	FALSE	FALSE	FALSE	FALSE	FALSE	FALSE	FALSE
chr01	28324	28356	+	33	XUT0003_28324_28356_33	XUT0003	12	TRUE	TRUE	FALSE	FALSE	FALSE	FALSE	FALSE	FALSE	FALSE
chr01	28423	28449	+	27	XUT0003_28423_28449_27	XUT0003	14	TRUE	TRUE	FALSE	FALSE	FALSE	FALSE	FALSE	FALSE	FALSE
chr01	28648	28668	+	21	XUT0003_28648_28668_21	XUT0003	16	TRUE	TRUE	FALSE	FALSE	FALSE	FALSE	FALSE	FALSE	FALSE
chr01	28840	28863	+	24	XUT0003_28840_28863_24	XUT0003	17	TRUE	TRUE	FALSE	FALSE	FALSE	FALSE	FALSE	FALSE	FALSE
chr01	29083	29112	+	30	XUT0003_29083_29112_30	XUT0003	19	TRUE	TRUE	FALSE	FALSE	FALSE	FALSE	FALSE	FALSE	FALSE
chr01	30111	30134	+	24	XUT0004_30111_30134_24	XUT0004	1	TRUE	TRUE	FALSE	FALSE	FALSE	FALSE	FALSE	FALSE	FALSE
chr01	30162	30212	+	51	XUT0004_30162_30212_51	XUT0004	2	TRUE	TRUE	FALSE	FALSE	FALSE	FALSE	FALSE	FALSE	FALSE
chr01	30399	30437	+	39	XUT0004_30399_30437_39	XUT0004	5	TRUE	TRUE	FALSE	FALSE	FALSE	FALSE	FALSE	FALSE	FALSE
chr01	30549	30566	+	18	XUT0004_30549_30566_18	XUT0004	8	TRUE	TRUE	FALSE	FALSE	FALSE	FALSE	FALSE	FALSE	FALSE
chr01	30597	30635	+	39	XUT0004_30597_30635_39	XUT0004	9	TRUE	TRUE	FALSE	FALSE	FALSE	FALSE	FALSE	FALSE	FALSE
chr01	30726	30770	+	45	XUT0004_30726_30770_45	XUT0004	13	TRUE	TRUE	FALSE	FALSE	FALSE	FALSE	FALSE	FALSE	FALSE
chr01	30454	30534	+	81	XUT0004_30454_30534_81	XUT0004	6	TRUE	TRUE	FALSE	FALSE	FALSE	FALSE	FALSE	FALSE	FALSE
chr01	30646	30672	+	27	XUT0004_30646_30672_27	XUT0004	10	TRUE	TRUE	FALSE	FALSE	FALSE	FALSE	FALSE	FALSE	FALSE
chr01	30679	30705	+	27	XUT0004_30679_30705_27	XUT0004	11	TRUE	TRUE	FALSE	FALSE	FALSE	FALSE	FALSE	FALSE	FALSE
chr01	30197	30217	+	21	XUT0004_30197_30217_21	XUT0004	3	TRUE	TRUE	FALSE	FALSE	FALSE	FALSE	FALSE	FALSE	FALSE
chr01	30281	30385	+	105	XUT0004_30281_30385_105	XUT0004	4	TRUE	TRUE	FALSE	FALSE	FALSE	FALSE	FALSE	FALSE	FALSE
chr01	30518	30616	+	99	XUT0004_30518_30616_99	XUT0004	7	TRUE	TRUE	FALSE	FALSE	FALSE	FALSE	FALSE	FALSE	FALSE
chr01	30689	30808	+	120	XUT0004_30689_30808_120	XUT0004	12	TRUE	TRUE	FALSE	FALSE	FALSE	FALSE	FALSE	FALSE	FALSE
chr01	34108	34335	-	228	XUT0933_34108_34335_228	XUT0933	1	TRUE	TRUE	FALSE	TRUE	TRUE	FALSE	TRUE	TRUE	TRUE
chr01	33946	33987	-	42	XUT0933_33946_33987_42	XUT0933	6	TRUE	TRUE	FALSE	FALSE	FALSE	FALSE	FALSE	FALSE	FALSE
chr01	33502	33639	-	138	XUT0933_33502_33639_138	XUT0933	8	TRUE	TRUE	FALSE	FALSE	FALSE	TRUE	FALSE	TRUE	FALSE
chr01	33460	33498	-	39	XUT0933_33460_33498_39	XUT0933	9	TRUE	TRUE	FALSE	FALSE	FALSE	FALSE	FALSE	FALSE	FALSE
chr01	33382	33432	-	51	XUT0933_33382_33432_51	XUT0933	12	TRUE	TRUE	FALSE	FALSE	FALSE	FALSE	FALSE	FALSE	FALSE
chr01	33346	33360	-	15	XUT0933_33346_33360_15	XUT0933	13	TRUE	TRUE	FALSE	FALSE	FALSE	FALSE	FALSE	FALSE	FALSE
chr01	33163	33330	-	168	XUT0933_33163_33330_168	XUT0933	14	TRUE	TRUE	TRUE	FALSE	FALSE	FALSE	TRUE	TRUE	FALSE
chr01	32401	32478	-	78	XUT0933_32401_32478_78	XUT0933	21	TRUE	TRUE	FALSE	FALSE	FALSE	FALSE	FALSE	FALSE	FALSE
chr01	31882	31986	-	105	XUT0933_31882_31986_105	XUT0933	25	TRUE	TRUE	FALSE	FALSE	FALSE	FALSE	FALSE	FALSE	FALSE
chr01	31459	31506	-	48	XUT0933_31459_31506_48	XUT0933	28	TRUE	TRUE	FALSE	FALSE	FALSE	FALSE	FALSE	FALSE	FALSE
chr01	34287	34325	-	39	XUT0933_34287_34325_39	XUT0933	2	TRUE	TRUE	FALSE	FALSE	FALSE	FALSE	FALSE	FALSE	FALSE
chr01	34161	34193	-	33	XUT0933_34161_34193_33	XUT0933	4	TRUE	TRUE	FALSE	FALSE	FALSE	FALSE	FALSE	FALSE	FALSE
chr01	33966	34097	-	132	XUT0933_33966_34097_132	XUT0933	5	TRUE	TRUE	FALSE	FALSE	FALSE	FALSE	FALSE	FALSE	FALSE
chr01	33432	33482	-	51	XUT0933_33432_33482_51	XUT0933	10	TRUE	TRUE	FALSE	FALSE	FALSE	FALSE	FALSE	FALSE	FALSE
chr01	32772	32900	-	129	XUT0933_32772_32900_129	XUT0933	17	TRUE	TRUE	FALSE	FALSE	FALSE	FALSE	FALSE	FALSE	FALSE
chr01	32364	32591	-	228	XUT0933_32364_32591_228	XUT0933	19	TRUE	TRUE	FALSE	FALSE	FALSE	TRUE	FALSE	TRUE	FALSE
chr01	32190	32345	-	156	XUT0933_32190_32345_156	XUT0933	23	TRUE	TRUE	TRUE	FALSE	TRUE	FALSE	FALSE	TRUE	TRUE
chr01	31599	31697	-	99	XUT0933_31599_31697_99	XUT0933	27	TRUE	TRUE	FALSE	FALSE	FALSE	FALSE	FALSE	FALSE	FALSE
chr01	34034	34243	-	210	XUT0933_34034_34243_210	XUT0933	3	TRUE	TRUE	FALSE	TRUE	FALSE	FALSE	TRUE	TRUE	TRUE
chr01	33635	33844	-	210	XUT0933_33635_33844_210	XUT0933	7	TRUE	TRUE	FALSE	FALSE	FALSE	FALSE	FALSE	FALSE	FALSE
chr01	33248	33439	-	192	XUT0933_33248_33439_192	XUT0933	11	TRUE	TRUE	FALSE	FALSE	FALSE	FALSE	FALSE	FALSE	FALSE
chr01	33113	33151	-	39	XUT0933_33113_33151_39	XUT0933	15	TRUE	TRUE	FALSE	FALSE	FALSE	FALSE	FALSE	FALSE	FALSE
chr01	33005	33031	-	27	XUT0933_33005_33031_27	XUT0933	16	TRUE	TRUE	FALSE	FALSE	FALSE	FALSE	FALSE	FALSE	FALSE
chr01	32837	32866	-	30	XUT0933_32837_32866_30	XUT0933	18	TRUE	TRUE	FALSE	FALSE	FALSE	FALSE	FALSE	FALSE	FALSE
chr01	32528	32557	-	30	XUT0933_32528_32557_30	XUT0933	20	TRUE	TRUE	FALSE	FALSE	FALSE	FALSE	FALSE	FALSE	FALSE
chr01	32432	32470	-	39	XUT0933_32432_32470_39	XUT0933	22	TRUE	TRUE	FALSE	FALSE	FALSE	FALSE	FALSE	FALSE	FALSE
chr01	31967	32071	-	105	XUT0933_31967_32071_105	XUT0933	24	TRUE	TRUE	TRUE	FALSE	FALSE	TRUE	FALSE	TRUE	FALSE
chr01	31769	31813	-	45	XUT0933_31769_31813_45	XUT0933	26	TRUE	TRUE	FALSE	FALSE	FALSE	FALSE	FALSE	FALSE	FALSE
chr01	34953	35006	-	54	XUT0934_34953_35006_54	XUT0934	1	TRUE	TRUE	FALSE	FALSE	FALSE	FALSE	FALSE	FALSE	FALSE
chr01	34818	34847	-	30	XUT0934_34818_34847_30	XUT0934	2	TRUE	TRUE	FALSE	FALSE	FALSE	FALSE	FALSE	FALSE	FALSE
chr01	35356	35373	-	18	XUT0935_35356_35373_18	XUT0935	1	TRUE	FALSE	FALSE	FALSE	FALSE	FALSE	FALSE	FALSE	FALSE
chr01	35286	35312	-	27	XUT0935_35286_35312_27	XUT0935	2	TRUE	FALSE	FALSE	FALSE	FALSE	FALSE	FALSE	FALSE	FALSE
chr01	36005	36052	-	48	XUT0936_36005_36052_48	XUT0936	2	TRUE	TRUE	FALSE	FALSE	FALSE	FALSE	FALSE	FALSE	FALSE
chr01	35972	36001	-	30	XUT0936_35972_36001_30	XUT0936	4	TRUE	TRUE	FALSE	FALSE	FALSE	FALSE	FALSE	FALSE	FALSE
chr01	35908	35928	-	21	XUT0936_35908_35928_21	XUT0936	5	TRUE	TRUE	FALSE	FALSE	FALSE	FALSE	FALSE	FALSE	FALSE
chr01	35731	35889	-	159	XUT0936_35731_35889_159	XUT0936	6	TRUE	TRUE	FALSE	FALSE	FALSE	FALSE	FALSE	FALSE	FALSE
chr01	35668	35694	-	27	XUT0936_35668_35694_27	XUT0936	8	TRUE	TRUE	FALSE	FALSE	FALSE	FALSE	FALSE	FALSE	FALSE
chr01	35572	35619	-	48	XUT0936_35572_35619_48	XUT0936	9	TRUE	TRUE	FALSE	FALSE	FALSE	FALSE	FALSE	FALSE	FALSE
chr01	36108	36164	-	57	XUT0936_36108_36164_57	XUT0936	1	TRUE	TRUE	FALSE	FALSE	FALSE	FALSE	FALSE	FALSE	FALSE
chr01	35967	36023	-	57	XUT0936_35967_36023_57	XUT0936	3	TRUE	TRUE	FALSE	FALSE	FALSE	FALSE	FALSE	FALSE	FALSE
chr01	35622	35771	-	150	XUT0936_35622_35771_150	XUT0936	7	TRUE	TRUE	FALSE	FALSE	FALSE	FALSE	FALSE	FALSE	FALSE
chr01	43429	43446	+	18	XUT0005_43429_43446_18	XUT0005	2	TRUE	TRUE	FALSE	FALSE	FALSE	FALSE	FALSE	FALSE	FALSE
chr01	43537	43563	+	27	XUT0005_43537_43563_27	XUT0005	3	TRUE	TRUE	FALSE	FALSE	FALSE	FALSE	FALSE	FALSE	FALSE
chr01	44080	44256	+	177	XUT0005_44080_44256_177	XUT0005	10	TRUE	TRUE	FALSE	FALSE	FALSE	FALSE	FALSE	FALSE	FALSE
chr01	44650	44682	+	33	XUT0005_44650_44682_33	XUT0005	16	TRUE	TRUE	FALSE	FALSE	FALSE	FALSE	FALSE	FALSE	FALSE
chr01	44998	45021	+	24	XUT0005_44998_45021_24	XUT0005	20	TRUE	TRUE	FALSE	FALSE	FALSE	FALSE	FALSE	FALSE	FALSE
chr01	45058	45078	+	21	XUT0005_45058_45078_21	XUT0005	21	TRUE	TRUE	FALSE	FALSE	FALSE	FALSE	FALSE	FALSE	FALSE
chr01	45133	45219	+	87	XUT0005_45133_45219_87	XUT0005	22	TRUE	TRUE	FALSE	FALSE	FALSE	FALSE	FALSE	FALSE	FALSE
chr01	45226	45345	+	120	XUT0005_45226_45345_120	XUT0005	23	TRUE	TRUE	FALSE	FALSE	FALSE	FALSE	FALSE	FALSE	FALSE
chr01	45514	45543	+	30	XUT0005_45514_45543_30	XUT0005	27	TRUE	TRUE	FALSE	FALSE	FALSE	FALSE	FALSE	FALSE	FALSE
chr01	43403	43429	+	27	XUT0005_43403_43429_27	XUT0005	1	TRUE	TRUE	FALSE	FALSE	FALSE	FALSE	FALSE	FALSE	FALSE
chr01	43592	43723	+	132	XUT0005_43592_43723_132	XUT0005	4	TRUE	TRUE	FALSE	FALSE	FALSE	FALSE	FALSE	FALSE	FALSE
chr01	43730	43888	+	159	XUT0005_43730_43888_159	XUT0005	6	TRUE	TRUE	FALSE	FALSE	FALSE	FALSE	FALSE	FALSE	FALSE
chr01	44027	44077	+	51	XUT0005_44027_44077_51	XUT0005	9	TRUE	TRUE	FALSE	FALSE	FALSE	FALSE	FALSE	FALSE	FALSE
chr01	44165	44233	+	69	XUT0005_44165_44233_69	XUT0005	11	TRUE	TRUE	FALSE	FALSE	FALSE	FALSE	FALSE	FALSE	FALSE
chr01	44600	44629	+	30	XUT0005_44600_44629_30	XUT0005	15	TRUE	TRUE	FALSE	FALSE	FALSE	FALSE	FALSE	FALSE	FALSE
chr01	44897	44977	+	81	XUT0005_44897_44977_81	XUT0005	19	TRUE	TRUE	FALSE	FALSE	FALSE	FALSE	FALSE	FALSE	FALSE
chr01	45311	45415	+	105	XUT0005_45311_45415_105	XUT0005	24	TRUE	TRUE	FALSE	FALSE	FALSE	FALSE	FALSE	FALSE	FALSE
chr01	45422	45556	+	135	XUT0005_45422_45556_135	XUT0005	26	TRUE	TRUE	FALSE	FALSE	FALSE	FALSE	FALSE	FALSE	FALSE
chr01	43629	43730	+	102	XUT0005_43629_43730_102	XUT0005	5	TRUE	TRUE	FALSE	FALSE	FALSE	FALSE	FALSE	FALSE	FALSE
chr01	43935	43967	+	33	XUT0005_43935_43967_33	XUT0005	7	TRUE	TRUE	FALSE	FALSE	FALSE	FALSE	FALSE	FALSE	FALSE
chr01	43989	44012	+	24	XUT0005_43989_44012_24	XUT0005	8	TRUE	TRUE	FALSE	FALSE	FALSE	FALSE	FALSE	FALSE	FALSE
chr01	44265	44375	+	111	XUT0005_44265_44375_111	XUT0005	12	TRUE	TRUE	FALSE	FALSE	FALSE	FALSE	FALSE	FALSE	FALSE
chr01	44379	44477	+	99	XUT0005_44379_44477_99	XUT0005	13	TRUE	TRUE	FALSE	FALSE	FALSE	FALSE	FALSE	FALSE	FALSE
chr01	44571	44618	+	48	XUT0005_44571_44618_48	XUT0005	14	TRUE	TRUE	FALSE	FALSE	FALSE	FALSE	FALSE	FALSE	FALSE
chr01	44694	44792	+	99	XUT0005_44694_44792_99	XUT0005	17	TRUE	TRUE	FALSE	FALSE	FALSE	FALSE	FALSE	FALSE	FALSE
chr01	44862	45044	+	183	XUT0005_44862_45044_183	XUT0005	18	TRUE	TRUE	FALSE	FALSE	FALSE	FALSE	FALSE	FALSE	FALSE
chr01	45390	45524	+	135	XUT0005_45390_45524_135	XUT0005	25	TRUE	TRUE	FALSE	FALSE	FALSE	FALSE	FALSE	FALSE	FALSE
chr01	54305	54487	+	183	XUT0006_54305_54487_183	XUT0006	1	TRUE	TRUE	TRUE	FALSE	TRUE	FALSE	TRUE	TRUE	FALSE
chr01	68977	68991	+	15	XUT0007_68977_68991_15	XUT0007	2	FALSE	TRUE	FALSE	FALSE	FALSE	FALSE	FALSE	FALSE	FALSE
chr01	69574	69591	+	18	XUT0007_69574_69591_18	XUT0007	7	FALSE	TRUE	FALSE	FALSE	FALSE	FALSE	FALSE	FALSE	FALSE
chr01	69661	69687	+	27	XUT0007_69661_69687_27	XUT0007	8	FALSE	TRUE	FALSE	FALSE	FALSE	FALSE	FALSE	FALSE	FALSE
chr01	69047	69502	+	456	XUT0007_69047_69502_456	XUT0007	3	FALSE	TRUE	FALSE	FALSE	FALSE	FALSE	FALSE	FALSE	FALSE
chr01	68958	68972	+	15	XUT0007_68958_68972_15	XUT0007	1	FALSE	TRUE	FALSE	FALSE	FALSE	FALSE	FALSE	FALSE	FALSE
chr01	69336	69392	+	57	XUT0007_69336_69392_57	XUT0007	4	FALSE	TRUE	FALSE	FALSE	FALSE	FALSE	FALSE	FALSE	FALSE
chr01	69411	69440	+	30	XUT0007_69411_69440_30	XUT0007	5	FALSE	TRUE	FALSE	FALSE	FALSE	FALSE	FALSE	FALSE	FALSE
chr01	69462	69494	+	33	XUT0007_69462_69494_33	XUT0007	6	FALSE	TRUE	FALSE	FALSE	FALSE	FALSE	FALSE	FALSE	FALSE
chr01	70067	70144	+	78	XUT0008_70067_70144_78	XUT0008	1	TRUE	TRUE	TRUE	FALSE	FALSE	FALSE	FALSE	FALSE	FALSE
chr01	70712	70762	+	51	XUT0008_70712_70762_51	XUT0008	9	TRUE	TRUE	FALSE	FALSE	FALSE	FALSE	FALSE	FALSE	FALSE
chr01	70311	70358	+	48	XUT0008_70311_70358_48	XUT0008	4	TRUE	TRUE	FALSE	FALSE	FALSE	FALSE	FALSE	FALSE	FALSE
chr01	70557	70679	+	123	XUT0008_70557_70679_123	XUT0008	7	TRUE	TRUE	FALSE	FALSE	FALSE	FALSE	FALSE	FALSE	FALSE
chr01	70210	70233	+	24	XUT0008_70210_70233_24	XUT0008	2	TRUE	TRUE	FALSE	FALSE	FALSE	FALSE	FALSE	FALSE	FALSE
chr01	70258	70311	+	54	XUT0008_70258_70311_54	XUT0008	3	TRUE	TRUE	FALSE	FALSE	FALSE	FALSE	FALSE	FALSE	FALSE
chr01	70339	70431	+	93	XUT0008_70339_70431_93	XUT0008	5	TRUE	TRUE	FALSE	FALSE	FALSE	FALSE	FALSE	FALSE	FALSE
chr01	70528	70557	+	30	XUT0008_70528_70557_30	XUT0008	6	TRUE	TRUE	FALSE	FALSE	FALSE	FALSE	FALSE	FALSE	FALSE
chr01	70657	70767	+	111	XUT0008_70657_70767_111	XUT0008	8	TRUE	TRUE	FALSE	FALSE	FALSE	FALSE	FALSE	FALSE	FALSE
chr01	70544	70591	-	48	XUT0937_70544_70591_48	XUT0937	3	TRUE	TRUE	FALSE	FALSE	FALSE	FALSE	FALSE	FALSE	FALSE
chr01	70873	70938	-	66	XUT0937_70873_70938_66	XUT0937	1	TRUE	TRUE	FALSE	FALSE	FALSE	FALSE	FALSE	FALSE	FALSE
chr01	70624	70713	-	90	XUT0937_70624_70713_90	XUT0937	2	TRUE	TRUE	FALSE	FALSE	FALSE	FALSE	FALSE	FALSE	FALSE
chr01	71418	71501	-	84	XUT0938_71418_71501_84	XUT0938	1	TRUE	TRUE	TRUE	FALSE	FALSE	FALSE	FALSE	FALSE	FALSE
chr01	71204	71320	-	117	XUT0938_71204_71320_117	XUT0938	3	TRUE	TRUE	FALSE	FALSE	FALSE	FALSE	FALSE	FALSE	FALSE
chr01	71329	71388	-	60	XUT0938_71329_71388_60	XUT0938	2	TRUE	TRUE	FALSE	FALSE	FALSE	FALSE	FALSE	FALSE	FALSE
chr01	71233	71283	-	51	XUT0938_71233_71283_51	XUT0938	4	TRUE	TRUE	FALSE	FALSE	FALSE	FALSE	FALSE	FALSE	FALSE
chr01	71080	71178	-	99	XUT0938_71080_71178_99	XUT0938	5	TRUE	TRUE	FALSE	FALSE	FALSE	FALSE	FALSE	FALSE	FALSE
chr01	93783	93884	-	102	XUT0939_93783_93884_102	XUT0939	1	TRUE	FALSE	FALSE	FALSE	FALSE	FALSE	FALSE	FALSE	FALSE
chr01	137953	137982	+	30	XUT0009_137953_137982_30	XUT0009	3	TRUE	TRUE	FALSE	FALSE	FALSE	FALSE	FALSE	FALSE	FALSE
chr01	137771	137860	+	90	XUT0009_137771_137860_90	XUT0009	1	TRUE	TRUE	FALSE	FALSE	FALSE	FALSE	TRUE	TRUE	TRUE
chr01	137927	138016	+	90	XUT0009_137927_138016_90	XUT0009	2	TRUE	TRUE	FALSE	FALSE	FALSE	FALSE	FALSE	FALSE	FALSE
chr01	138270	138284	+	15	XUT0009_138270_138284_15	XUT0009	4	TRUE	TRUE	FALSE	FALSE	FALSE	FALSE	FALSE	FALSE	FALSE
chr01	138501	138548	+	48	XUT0010_138501_138548_48	XUT0010	1	TRUE	TRUE	FALSE	FALSE	FALSE	FALSE	FALSE	FALSE	FALSE
chr01	138612	138647	+	36	XUT0010_138612_138647_36	XUT0010	2	TRUE	TRUE	FALSE	FALSE	FALSE	FALSE	FALSE	FALSE	FALSE
chr01	138622	138639	+	18	XUT0010_138622_138639_18	XUT0010	3	TRUE	TRUE	FALSE	FALSE	FALSE	FALSE	FALSE	FALSE	FALSE
chr01	151732	151836	-	105	XUT0940_151732_151836_105	XUT0940	4	FALSE	TRUE	FALSE	FALSE	FALSE	FALSE	FALSE	FALSE	FALSE
chr01	151992	152027	-	36	XUT0940_151992_152027_36	XUT0940	1	FALSE	TRUE	TRUE	FALSE	TRUE	FALSE	TRUE	TRUE	TRUE
chr01	151943	152011	-	69	XUT0940_151943_152011_69	XUT0940	2	FALSE	TRUE	TRUE	FALSE	FALSE	FALSE	TRUE	TRUE	TRUE
chr01	151883	151936	-	54	XUT0940_151883_151936_54	XUT0940	3	FALSE	TRUE	TRUE	FALSE	FALSE	FALSE	FALSE	FALSE	FALSE
chr01	165598	165639	+	42	XUT0011_165598_165639_42	XUT0011	2	FALSE	FALSE	FALSE	FALSE	FALSE	FALSE	FALSE	FALSE	FALSE
chr01	165413	165508	+	96	XUT0011_165413_165508_96	XUT0011	1	FALSE	FALSE	FALSE	FALSE	FALSE	FALSE	FALSE	FALSE	FALSE
chr01	165660	165683	+	24	XUT0011_165660_165683_24	XUT0011	3	FALSE	FALSE	FALSE	FALSE	FALSE	FALSE	FALSE	FALSE	FALSE
chr01	172110	172217	+	108	XUT0012_172110_172217_108	XUT0012	3	FALSE	TRUE	TRUE	FALSE	TRUE	TRUE	FALSE	TRUE	TRUE
chr01	172230	172379	+	150	XUT0012_172230_172379_150	XUT0012	6	FALSE	TRUE	FALSE	FALSE	FALSE	FALSE	FALSE	FALSE	FALSE
chr01	172183	172227	+	45	XUT0012_172183_172227_45	XUT0012	4	FALSE	TRUE	TRUE	FALSE	TRUE	FALSE	TRUE	TRUE	TRUE
chr01	172357	172491	+	135	XUT0012_172357_172491_135	XUT0012	7	FALSE	TRUE	FALSE	FALSE	FALSE	FALSE	FALSE	FALSE	FALSE
chr01	171971	172006	+	36	XUT0012_171971_172006_36	XUT0012	1	FALSE	TRUE	FALSE	FALSE	FALSE	FALSE	FALSE	FALSE	FALSE
chr01	172040	172072	+	33	XUT0012_172040_172072_33	XUT0012	2	FALSE	TRUE	TRUE	FALSE	FALSE	FALSE	FALSE	FALSE	FALSE
chr01	172187	172324	+	138	XUT0012_172187_172324_138	XUT0012	5	FALSE	TRUE	TRUE	FALSE	TRUE	FALSE	FALSE	TRUE	TRUE
chr01	179338	179547	+	210	XUT0013_179338_179547_210	XUT0013	2	TRUE	TRUE	FALSE	FALSE	FALSE	FALSE	FALSE	FALSE	FALSE
chr01	179623	179637	+	15	XUT0013_179623_179637_15	XUT0013	7	TRUE	TRUE	FALSE	FALSE	FALSE	FALSE	FALSE	FALSE	FALSE
chr01	179974	179991	+	18	XUT0013_179974_179991_18	XUT0013	11	TRUE	TRUE	FALSE	FALSE	FALSE	FALSE	FALSE	FALSE	FALSE
chr01	180001	180063	+	63	XUT0013_180001_180063_63	XUT0013	12	TRUE	TRUE	FALSE	FALSE	FALSE	FALSE	FALSE	FALSE	FALSE
chr01	180082	180156	+	75	XUT0013_180082_180156_75	XUT0013	13	TRUE	TRUE	FALSE	FALSE	FALSE	FALSE	FALSE	FALSE	FALSE
chr01	180169	180201	+	33	XUT0013_180169_180201_33	XUT0013	14	TRUE	TRUE	FALSE	FALSE	FALSE	FALSE	FALSE	FALSE	FALSE
chr01	180292	180408	+	117	XUT0013_180292_180408_117	XUT0013	16	TRUE	TRUE	TRUE	FALSE	FALSE	FALSE	TRUE	TRUE	FALSE
chr01	180424	180453	+	30	XUT0013_180424_180453_30	XUT0013	17	TRUE	TRUE	FALSE	FALSE	FALSE	FALSE	FALSE	FALSE	FALSE
chr01	179294	179311	+	18	XUT0013_179294_179311_18	XUT0013	1	TRUE	TRUE	FALSE	FALSE	FALSE	FALSE	FALSE	FALSE	FALSE
chr01	179432	179506	+	75	XUT0013_179432_179506_75	XUT0013	3	TRUE	TRUE	FALSE	FALSE	FALSE	FALSE	FALSE	FALSE	FALSE
chr01	179576	179623	+	48	XUT0013_179576_179623_48	XUT0013	5	TRUE	TRUE	FALSE	FALSE	FALSE	FALSE	FALSE	FALSE	FALSE
chr01	179738	179845	+	108	XUT0013_179738_179845_108	XUT0013	9	TRUE	TRUE	FALSE	FALSE	FALSE	FALSE	FALSE	FALSE	FALSE
chr01	180488	180562	+	75	XUT0013_180488_180562_75	XUT0013	18	TRUE	TRUE	FALSE	FALSE	FALSE	FALSE	FALSE	FALSE	FALSE
chr01	179535	179558	+	24	XUT0013_179535_179558_24	XUT0013	4	TRUE	TRUE	FALSE	FALSE	FALSE	FALSE	FALSE	FALSE	FALSE
chr01	179616	179681	+	66	XUT0013_179616_179681_66	XUT0013	6	TRUE	TRUE	FALSE	FALSE	FALSE	FALSE	FALSE	FALSE	FALSE
chr01	179685	179708	+	24	XUT0013_179685_179708_24	XUT0013	8	TRUE	TRUE	FALSE	FALSE	FALSE	FALSE	FALSE	FALSE	FALSE
chr01	179865	179957	+	93	XUT0013_179865_179957_93	XUT0013	10	TRUE	TRUE	FALSE	FALSE	FALSE	FALSE	FALSE	FALSE	FALSE
chr01	180201	180269	+	69	XUT0013_180201_180269_69	XUT0013	15	TRUE	TRUE	FALSE	FALSE	FALSE	FALSE	FALSE	FALSE	FALSE
chr01	180543	180764	+	222	XUT0013_180543_180764_222	XUT0013	19	TRUE	TRUE	FALSE	FALSE	FALSE	FALSE	FALSE	FALSE	FALSE
chr01	183452	183517	-	66	XUT0942_183452_183517_66	XUT0942	1	FALSE	TRUE	FALSE	FALSE	FALSE	FALSE	FALSE	FALSE	FALSE
chr01	183203	183358	-	156	XUT0942_183203_183358_156	XUT0942	3	FALSE	TRUE	FALSE	FALSE	FALSE	FALSE	TRUE	TRUE	FALSE
chr01	182993	183031	-	39	XUT0942_182993_183031_39	XUT0942	5	FALSE	TRUE	FALSE	FALSE	FALSE	FALSE	FALSE	FALSE	FALSE
chr01	183475	183489	-	15	XUT0942_183475_183489_15	XUT0942	2	FALSE	TRUE	FALSE	FALSE	FALSE	FALSE	FALSE	FALSE	FALSE
chr01	183184	183303	-	120	XUT0942_183184_183303_120	XUT0942	4	FALSE	TRUE	FALSE	FALSE	TRUE	FALSE	TRUE	TRUE	TRUE
chr01	182940	182960	-	21	XUT0942_182940_182960_21	XUT0942	6	FALSE	TRUE	FALSE	FALSE	FALSE	FALSE	FALSE	FALSE	FALSE
chr01	183976	184110	-	135	XUT0943_183976_184110_135	XUT0943	3	TRUE	TRUE	TRUE	FALSE	TRUE	TRUE	TRUE	TRUE	TRUE
chr01	184113	184157	-	45	XUT0943_184113_184157_45	XUT0943	2	TRUE	TRUE	FALSE	FALSE	FALSE	FALSE	FALSE	FALSE	FALSE
chr01	183801	183869	-	69	XUT0943_183801_183869_69	XUT0943	5	TRUE	TRUE	FALSE	FALSE	FALSE	FALSE	FALSE	FALSE	FALSE
chr01	184100	184279	-	180	XUT0943_184100_184279_180	XUT0943	1	TRUE	TRUE	TRUE	FALSE	FALSE	FALSE	FALSE	FALSE	FALSE
chr01	183959	183976	-	18	XUT0943_183959_183976_18	XUT0943	4	TRUE	TRUE	FALSE	FALSE	FALSE	FALSE	FALSE	FALSE	FALSE
chr01	183785	183832	-	48	XUT0943_183785_183832_48	XUT0943	6	TRUE	TRUE	FALSE	FALSE	FALSE	FALSE	FALSE	FALSE	FALSE
chr01	189965	190021	-	57	XUT0944_189965_190021_57	XUT0944	2	FALSE	FALSE	FALSE	FALSE	FALSE	FALSE	FALSE	FALSE	FALSE
chr01	189887	189925	-	39	XUT0944_189887_189925_39	XUT0944	4	FALSE	FALSE	FALSE	FALSE	FALSE	FALSE	FALSE	FALSE	FALSE
chr01	189972	190043	-	72	XUT0944_189972_190043_72	XUT0944	1	FALSE	FALSE	FALSE	FALSE	FALSE	FALSE	FALSE	FALSE	FALSE
chr01	189819	189962	-	144	XUT0944_189819_189962_144	XUT0944	3	FALSE	FALSE	FALSE	FALSE	FALSE	FALSE	FALSE	FALSE	FALSE
chr01	189735	189806	-	72	XUT0944_189735_189806_72	XUT0944	5	FALSE	FALSE	FALSE	FALSE	FALSE	FALSE	FALSE	FALSE	FALSE
chr01	198659	198754	+	96	XUT0014_198659_198754_96	XUT0014	1	TRUE	TRUE	FALSE	FALSE	FALSE	FALSE	FALSE	FALSE	FALSE
chr01	198902	198967	+	66	XUT0014_198902_198967_66	XUT0014	3	TRUE	TRUE	TRUE	FALSE	FALSE	TRUE	TRUE	TRUE	TRUE
chr01	199046	199069	+	24	XUT0014_199046_199069_24	XUT0014	4	TRUE	TRUE	FALSE	FALSE	FALSE	FALSE	FALSE	FALSE	FALSE
chr01	199724	199780	+	57	XUT0014_199724_199780_57	XUT0014	15	TRUE	TRUE	FALSE	FALSE	FALSE	FALSE	FALSE	FALSE	FALSE
chr01	199128	199211	+	84	XUT0014_199128_199211_84	XUT0014	6	TRUE	TRUE	FALSE	FALSE	FALSE	FALSE	FALSE	FALSE	FALSE
chr01	199374	199445	+	72	XUT0014_199374_199445_72	XUT0014	8	TRUE	TRUE	TRUE	FALSE	FALSE	FALSE	FALSE	FALSE	FALSE
chr01	199488	199502	+	15	XUT0014_199488_199502_15	XUT0014	11	TRUE	TRUE	FALSE	FALSE	FALSE	FALSE	FALSE	FALSE	FALSE
chr01	199578	199685	+	108	XUT0014_199578_199685_108	XUT0014	12	TRUE	TRUE	FALSE	FALSE	FALSE	FALSE	FALSE	FALSE	FALSE
chr01	199698	199721	+	24	XUT0014_199698_199721_24	XUT0014	14	TRUE	TRUE	FALSE	FALSE	FALSE	FALSE	FALSE	FALSE	FALSE
chr01	198898	198951	+	54	XUT0014_198898_198951_54	XUT0014	2	TRUE	TRUE	TRUE	FALSE	FALSE	TRUE	TRUE	TRUE	TRUE
chr01	199096	199167	+	72	XUT0014_199096_199167_72	XUT0014	5	TRUE	TRUE	FALSE	FALSE	FALSE	FALSE	FALSE	FALSE	FALSE
chr01	199369	199395	+	27	XUT0014_199369_199395_27	XUT0014	7	TRUE	TRUE	FALSE	FALSE	FALSE	FALSE	FALSE	FALSE	FALSE
chr01	199420	199449	+	30	XUT0014_199420_199449_30	XUT0014	9	TRUE	TRUE	FALSE	FALSE	FALSE	FALSE	FALSE	FALSE	FALSE
chr01	199459	199536	+	78	XUT0014_199459_199536_78	XUT0014	10	TRUE	TRUE	FALSE	FALSE	FALSE	FALSE	FALSE	FALSE	FALSE
chr01	199657	199755	+	99	XUT0014_199657_199755_99	XUT0014	13	TRUE	TRUE	FALSE	FALSE	FALSE	FALSE	FALSE	FALSE	FALSE
chr01	202854	202907	-	54	XUT0945_202854_202907_54	XUT0945	1	TRUE	TRUE	FALSE	FALSE	FALSE	FALSE	FALSE	FALSE	FALSE
chr01	203265	203417	-	153	XUT0946_203265_203417_153	XUT0946	1	TRUE	TRUE	FALSE	FALSE	FALSE	FALSE	FALSE	FALSE	FALSE
chr01	206392	206409	-	18	XUT0947_206392_206409_18	XUT0947	1	TRUE	TRUE	FALSE	FALSE	FALSE	FALSE	FALSE	FALSE	FALSE
chr01	206735	206893	-	159	XUT0948_206735_206893_159	XUT0948	1	TRUE	FALSE	FALSE	FALSE	FALSE	FALSE	FALSE	FALSE	FALSE
chr01	206863	206877	-	15	XUT0948_206863_206877_15	XUT0948	2	TRUE	FALSE	FALSE	FALSE	FALSE	FALSE	FALSE	FALSE	FALSE
chr01	206647	206676	-	30	XUT0948_206647_206676_30	XUT0948	3	TRUE	FALSE	FALSE	FALSE	FALSE	FALSE	FALSE	FALSE	FALSE
chr01	207791	207988	-	198	XUT0949_207791_207988_198	XUT0949	1	TRUE	TRUE	TRUE	FALSE	FALSE	FALSE	TRUE	TRUE	FALSE
chr01	207397	207411	-	15	XUT0949_207397_207411_15	XUT0949	2	TRUE	TRUE	FALSE	FALSE	FALSE	FALSE	FALSE	FALSE	FALSE
chr01	209087	209143	+	57	XUT0015_209087_209143_57	XUT0015	1	TRUE	TRUE	FALSE	FALSE	FALSE	FALSE	FALSE	FALSE	FALSE
chr01	209255	209296	+	42	XUT0015_209255_209296_42	XUT0015	2	TRUE	TRUE	FALSE	FALSE	FALSE	FALSE	FALSE	FALSE	FALSE
chr01	213287	213316	+	30	XUT0016_213287_213316_30	XUT0016	3	TRUE	FALSE	FALSE	FALSE	FALSE	FALSE	FALSE	FALSE	FALSE
chr01	213114	213194	+	81	XUT0016_213114_213194_81	XUT0016	1	TRUE	FALSE	FALSE	FALSE	FALSE	FALSE	FALSE	FALSE	FALSE
chr01	213252	213335	+	84	XUT0016_213252_213335_84	XUT0016	2	TRUE	FALSE	FALSE	FALSE	FALSE	FALSE	FALSE	FALSE	FALSE
chr01	220345	220362	-	18	XUT0950_220345_220362_18	XUT0950	4	TRUE	TRUE	FALSE	FALSE	FALSE	FALSE	FALSE	FALSE	FALSE
chr01	220761	220793	-	33	XUT0950_220761_220793_33	XUT0950	1	TRUE	TRUE	FALSE	FALSE	FALSE	FALSE	FALSE	FALSE	FALSE
chr01	220446	220502	-	57	XUT0950_220446_220502_57	XUT0950	2	TRUE	TRUE	FALSE	FALSE	FALSE	FALSE	FALSE	FALSE	FALSE
chr01	220391	220432	-	42	XUT0950_220391_220432_42	XUT0950	3	TRUE	TRUE	FALSE	FALSE	FALSE	FALSE	FALSE	FALSE	FALSE
chr01	222757	222783	-	27	XUT0951_222757_222783_27	XUT0951	2	TRUE	TRUE	FALSE	FALSE	FALSE	FALSE	FALSE	FALSE	FALSE
chr01	222664	222699	-	36	XUT0951_222664_222699_36	XUT0951	3	TRUE	TRUE	FALSE	FALSE	FALSE	FALSE	FALSE	FALSE	FALSE
chr01	222559	222591	-	33	XUT0951_222559_222591_33	XUT0951	5	TRUE	TRUE	FALSE	FALSE	FALSE	FALSE	FALSE	FALSE	FALSE
chr01	222475	222495	-	21	XUT0951_222475_222495_21	XUT0951	8	TRUE	TRUE	FALSE	FALSE	FALSE	FALSE	FALSE	FALSE	FALSE
chr01	222331	222345	-	15	XUT0951_222331_222345_15	XUT0951	10	TRUE	TRUE	FALSE	FALSE	FALSE	FALSE	FALSE	FALSE	FALSE
chr01	222217	222243	-	27	XUT0951_222217_222243_27	XUT0951	11	TRUE	TRUE	FALSE	FALSE	FALSE	FALSE	FALSE	FALSE	FALSE
chr01	222103	222126	-	24	XUT0951_222103_222126_24	XUT0951	12	TRUE	TRUE	FALSE	FALSE	FALSE	FALSE	FALSE	FALSE	FALSE
chr01	222037	222072	-	36	XUT0951_222037_222072_36	XUT0951	13	TRUE	TRUE	FALSE	FALSE	FALSE	FALSE	FALSE	FALSE	FALSE
chr01	221467	221496	-	30	XUT0951_221467_221496_30	XUT0951	17	TRUE	TRUE	FALSE	FALSE	FALSE	FALSE	FALSE	FALSE	FALSE
chr01	222783	222827	-	45	XUT0951_222783_222827_45	XUT0951	1	TRUE	TRUE	FALSE	FALSE	FALSE	FALSE	FALSE	FALSE	FALSE
chr01	222495	222539	-	45	XUT0951_222495_222539_45	XUT0951	6	TRUE	TRUE	FALSE	FALSE	FALSE	FALSE	FALSE	FALSE	FALSE
chr01	222614	222685	-	72	XUT0951_222614_222685_72	XUT0951	4	TRUE	TRUE	FALSE	FALSE	FALSE	FALSE	FALSE	FALSE	FALSE
chr01	222467	222511	-	45	XUT0951_222467_222511_45	XUT0951	7	TRUE	TRUE	FALSE	FALSE	FALSE	FALSE	FALSE	FALSE	FALSE
chr01	222401	222463	-	63	XUT0951_222401_222463_63	XUT0951	9	TRUE	TRUE	FALSE	FALSE	FALSE	FALSE	FALSE	FALSE	FALSE
chr01	221897	221932	-	36	XUT0951_221897_221932_36	XUT0951	14	TRUE	TRUE	FALSE	FALSE	FALSE	FALSE	FALSE	FALSE	FALSE
chr01	221726	221767	-	42	XUT0951_221726_221767_42	XUT0951	15	TRUE	TRUE	FALSE	FALSE	FALSE	FALSE	FALSE	FALSE	FALSE
chr01	221504	221542	-	39	XUT0951_221504_221542_39	XUT0951	16	TRUE	TRUE	FALSE	FALSE	FALSE	FALSE	FALSE	FALSE	FALSE
chr02	10905	10928	+	24	XUT0017_10905_10928_24	XUT0017	2	TRUE	TRUE	FALSE	FALSE	FALSE	FALSE	FALSE	FALSE	FALSE
chr02	11100	11174	+	75	XUT0017_11100_11174_75	XUT0017	3	TRUE	TRUE	FALSE	FALSE	FALSE	FALSE	FALSE	FALSE	FALSE
chr02	11367	11411	+	45	XUT0017_11367_11411_45	XUT0017	6	TRUE	TRUE	FALSE	FALSE	FALSE	FALSE	FALSE	FALSE	FALSE
chr02	11547	11597	+	51	XUT0017_11547_11597_51	XUT0017	8	TRUE	TRUE	FALSE	FALSE	FALSE	FALSE	FALSE	FALSE	FALSE
chr02	11634	11723	+	90	XUT0017_11634_11723_90	XUT0017	10	TRUE	TRUE	FALSE	FALSE	FALSE	FALSE	FALSE	FALSE	FALSE
chr02	11958	12233	+	276	XUT0017_11958_12233_276	XUT0017	11	TRUE	TRUE	FALSE	FALSE	FALSE	FALSE	FALSE	FALSE	FALSE
chr02	12330	12524	+	195	XUT0017_12330_12524_195	XUT0017	14	TRUE	TRUE	FALSE	FALSE	FALSE	FALSE	FALSE	FALSE	FALSE
chr02	12624	12800	+	177	XUT0017_12624_12800_177	XUT0017	17	TRUE	TRUE	FALSE	FALSE	FALSE	FALSE	FALSE	FALSE	FALSE
chr02	13158	13229	+	72	XUT0017_13158_13229_72	XUT0017	24	TRUE	TRUE	FALSE	FALSE	FALSE	FALSE	FALSE	FALSE	FALSE
chr02	13260	13409	+	150	XUT0017_13260_13409_150	XUT0017	26	TRUE	TRUE	TRUE	FALSE	TRUE	FALSE	FALSE	TRUE	FALSE
chr02	13437	13589	+	153	XUT0017_13437_13589_153	XUT0017	27	TRUE	TRUE	TRUE	FALSE	FALSE	FALSE	FALSE	FALSE	FALSE
chr02	13755	13817	+	63	XUT0017_13755_13817_63	XUT0017	29	TRUE	TRUE	FALSE	FALSE	FALSE	FALSE	FALSE	FALSE	FALSE
chr02	11179	11193	+	15	XUT0017_11179_11193_15	XUT0017	4	TRUE	TRUE	FALSE	FALSE	FALSE	FALSE	FALSE	FALSE	FALSE
chr02	11395	11445	+	51	XUT0017_11395_11445_51	XUT0017	7	TRUE	TRUE	FALSE	FALSE	FALSE	FALSE	FALSE	FALSE	FALSE
chr02	12283	12339	+	57	XUT0017_12283_12339_57	XUT0017	13	TRUE	TRUE	FALSE	FALSE	FALSE	FALSE	FALSE	FALSE	FALSE
chr02	12604	12639	+	36	XUT0017_12604_12639_36	XUT0017	16	TRUE	TRUE	FALSE	FALSE	FALSE	FALSE	FALSE	FALSE	FALSE
chr02	12664	12699	+	36	XUT0017_12664_12699_36	XUT0017	18	TRUE	TRUE	FALSE	FALSE	FALSE	FALSE	FALSE	FALSE	FALSE
chr02	12730	12810	+	81	XUT0017_12730_12810_81	XUT0017	20	TRUE	TRUE	FALSE	FALSE	FALSE	FALSE	FALSE	FALSE	FALSE
chr02	12838	12912	+	75	XUT0017_12838_12912_75	XUT0017	21	TRUE	TRUE	FALSE	FALSE	FALSE	FALSE	FALSE	FALSE	FALSE
chr02	12937	12975	+	39	XUT0017_12937_12975_39	XUT0017	22	TRUE	TRUE	FALSE	FALSE	FALSE	FALSE	FALSE	FALSE	FALSE
chr02	13762	13776	+	15	XUT0017_13762_13776_15	XUT0017	30	TRUE	TRUE	FALSE	FALSE	FALSE	FALSE	FALSE	FALSE	FALSE
chr02	10799	10816	+	18	XUT0017_10799_10816_18	XUT0017	1	TRUE	TRUE	FALSE	FALSE	FALSE	FALSE	FALSE	FALSE	FALSE
chr02	11300	11332	+	33	XUT0017_11300_11332_33	XUT0017	5	TRUE	TRUE	FALSE	FALSE	FALSE	FALSE	FALSE	FALSE	FALSE
chr02	11597	11620	+	24	XUT0017_11597_11620_24	XUT0017	9	TRUE	TRUE	FALSE	FALSE	FALSE	FALSE	FALSE	FALSE	FALSE
chr02	12092	12157	+	66	XUT0017_12092_12157_66	XUT0017	12	TRUE	TRUE	FALSE	FALSE	FALSE	FALSE	FALSE	FALSE	FALSE
chr02	12470	12508	+	39	XUT0017_12470_12508_39	XUT0017	15	TRUE	TRUE	FALSE	FALSE	FALSE	FALSE	FALSE	FALSE	FALSE
chr02	12713	12751	+	39	XUT0017_12713_12751_39	XUT0017	19	TRUE	TRUE	FALSE	FALSE	FALSE	FALSE	FALSE	FALSE	FALSE
chr02	13037	13120	+	84	XUT0017_13037_13120_84	XUT0017	23	TRUE	TRUE	FALSE	FALSE	FALSE	FALSE	FALSE	FALSE	FALSE
chr02	13238	13291	+	54	XUT0017_13238_13291_54	XUT0017	25	TRUE	TRUE	FALSE	FALSE	FALSE	FALSE	FALSE	FALSE	FALSE
chr02	13676	13807	+	132	XUT0017_13676_13807_132	XUT0017	28	TRUE	TRUE	FALSE	FALSE	FALSE	FALSE	FALSE	FALSE	FALSE
chr02	13817	13843	+	27	XUT0017_13817_13843_27	XUT0017	31	TRUE	TRUE	FALSE	FALSE	FALSE	FALSE	FALSE	FALSE	FALSE
chr02	13859	13882	+	24	XUT0017_13859_13882_24	XUT0017	32	TRUE	TRUE	FALSE	FALSE	FALSE	FALSE	FALSE	FALSE	FALSE
chr02	35863	35952	-	90	XUT0952_35863_35952_90	XUT0952	1	TRUE	TRUE	FALSE	FALSE	FALSE	FALSE	FALSE	FALSE	FALSE
chr02	46615	46722	+	108	XUT0020_46615_46722_108	XUT0020	2	FALSE	TRUE	FALSE	FALSE	FALSE	FALSE	FALSE	FALSE	FALSE
chr02	46925	47038	+	114	XUT0020_46925_47038_114	XUT0020	4	FALSE	TRUE	FALSE	FALSE	FALSE	FALSE	TRUE	TRUE	FALSE
chr02	47261	47305	+	45	XUT0020_47261_47305_45	XUT0020	6	FALSE	TRUE	FALSE	FALSE	FALSE	FALSE	FALSE	FALSE	FALSE
chr02	46605	46712	+	108	XUT0020_46605_46712_108	XUT0020	1	FALSE	TRUE	FALSE	FALSE	FALSE	FALSE	FALSE	FALSE	FALSE
chr02	46740	46808	+	69	XUT0020_46740_46808_69	XUT0020	3	FALSE	TRUE	FALSE	FALSE	FALSE	FALSE	FALSE	FALSE	FALSE
chr02	46935	47192	+	258	XUT0020_46935_47192_258	XUT0020	5	FALSE	TRUE	FALSE	FALSE	FALSE	FALSE	TRUE	TRUE	TRUE
chr02	100465	100581	+	117	XUT0021_100465_100581_117	XUT0021	1	TRUE	TRUE	FALSE	FALSE	FALSE	FALSE	FALSE	FALSE	FALSE
chr02	100618	100773	+	156	XUT0021_100618_100773_156	XUT0021	2	TRUE	TRUE	FALSE	FALSE	FALSE	FALSE	FALSE	FALSE	FALSE
chr02	101114	101149	+	36	XUT0022_101114_101149_36	XUT0022	1	TRUE	TRUE	FALSE	FALSE	FALSE	FALSE	FALSE	FALSE	FALSE
chr02	121758	121811	+	54	XUT0023_121758_121811_54	XUT0023	1	FALSE	TRUE	FALSE	FALSE	FALSE	FALSE	FALSE	FALSE	FALSE
chr02	122061	122093	+	33	XUT0023_122061_122093_33	XUT0023	6	FALSE	TRUE	FALSE	FALSE	FALSE	FALSE	FALSE	FALSE	FALSE
chr02	122208	122267	+	60	XUT0023_122208_122267_60	XUT0023	8	FALSE	TRUE	FALSE	FALSE	FALSE	FALSE	FALSE	FALSE	FALSE
chr02	122286	122309	+	24	XUT0023_122286_122309_24	XUT0023	9	FALSE	TRUE	FALSE	FALSE	FALSE	FALSE	FALSE	FALSE	FALSE
chr02	121903	121935	+	33	XUT0023_121903_121935_33	XUT0023	3	FALSE	TRUE	FALSE	FALSE	FALSE	FALSE	FALSE	FALSE	FALSE
chr02	122017	122061	+	45	XUT0023_122017_122061_45	XUT0023	5	FALSE	TRUE	FALSE	FALSE	FALSE	FALSE	FALSE	FALSE	FALSE
chr02	122098	122187	+	90	XUT0023_122098_122187_90	XUT0023	7	FALSE	TRUE	FALSE	FALSE	FALSE	FALSE	FALSE	FALSE	FALSE
chr02	121826	121900	+	75	XUT0023_121826_121900_75	XUT0023	2	FALSE	TRUE	FALSE	FALSE	FALSE	FALSE	FALSE	FALSE	FALSE
chr02	121931	122074	+	144	XUT0023_121931_122074_144	XUT0023	4	FALSE	TRUE	TRUE	FALSE	FALSE	FALSE	FALSE	FALSE	FALSE
chr02	127113	127133	-	21	XUT0953_127113_127133_21	XUT0953	2	TRUE	TRUE	FALSE	FALSE	FALSE	FALSE	FALSE	FALSE	FALSE
chr02	126909	126980	-	72	XUT0953_126909_126980_72	XUT0953	3	TRUE	TRUE	FALSE	FALSE	FALSE	FALSE	FALSE	FALSE	FALSE
chr02	126519	126614	-	96	XUT0953_126519_126614_96	XUT0953	6	TRUE	TRUE	FALSE	FALSE	FALSE	FALSE	FALSE	FALSE	FALSE
chr02	126333	126461	-	129	XUT0953_126333_126461_129	XUT0953	9	TRUE	TRUE	FALSE	FALSE	FALSE	TRUE	FALSE	TRUE	FALSE
chr02	126117	126146	-	30	XUT0953_126117_126146_30	XUT0953	11	TRUE	TRUE	FALSE	FALSE	FALSE	FALSE	FALSE	FALSE	FALSE
chr02	127187	127228	-	42	XUT0953_127187_127228_42	XUT0953	1	TRUE	TRUE	FALSE	FALSE	FALSE	FALSE	FALSE	FALSE	FALSE
chr02	126920	126949	-	30	XUT0953_126920_126949_30	XUT0953	4	TRUE	TRUE	FALSE	FALSE	FALSE	FALSE	FALSE	FALSE	FALSE
chr02	126482	126502	-	21	XUT0953_126482_126502_21	XUT0953	7	TRUE	TRUE	FALSE	FALSE	FALSE	FALSE	FALSE	FALSE	FALSE
chr02	126134	126277	-	144	XUT0953_126134_126277_144	XUT0953	10	TRUE	TRUE	FALSE	FALSE	FALSE	TRUE	FALSE	TRUE	FALSE
chr02	126811	126882	-	72	XUT0953_126811_126882_72	XUT0953	5	TRUE	TRUE	FALSE	FALSE	FALSE	FALSE	FALSE	FALSE	FALSE
chr02	126457	126474	-	18	XUT0953_126457_126474_18	XUT0953	8	TRUE	TRUE	FALSE	FALSE	FALSE	FALSE	FALSE	FALSE	FALSE
chr02	138129	138152	+	24	XUT0024_138129_138152_24	XUT0024	2	TRUE	TRUE	FALSE	FALSE	FALSE	FALSE	FALSE	FALSE	FALSE
chr02	138162	138185	+	24	XUT0024_138162_138185_24	XUT0024	3	TRUE	TRUE	FALSE	FALSE	FALSE	FALSE	FALSE	FALSE	FALSE
chr02	138207	138242	+	36	XUT0024_138207_138242_36	XUT0024	4	TRUE	TRUE	FALSE	FALSE	FALSE	FALSE	FALSE	FALSE	FALSE
chr02	138029	138076	+	48	XUT0024_138029_138076_48	XUT0024	1	TRUE	TRUE	FALSE	FALSE	FALSE	FALSE	FALSE	FALSE	FALSE
chr02	138520	138567	+	48	XUT0025_138520_138567_48	XUT0025	2	TRUE	TRUE	FALSE	FALSE	FALSE	FALSE	FALSE	FALSE	FALSE
chr02	138305	138328	+	24	XUT0025_138305_138328_24	XUT0025	1	TRUE	TRUE	FALSE	FALSE	FALSE	FALSE	FALSE	FALSE	FALSE
chr02	152407	152424	+	18	XUT0026_152407_152424_18	XUT0026	1	TRUE	TRUE	FALSE	FALSE	FALSE	FALSE	FALSE	FALSE	FALSE
chr02	152479	152517	+	39	XUT0026_152479_152517_39	XUT0026	2	TRUE	TRUE	FALSE	FALSE	FALSE	FALSE	FALSE	FALSE	FALSE
chr02	152563	152598	+	36	XUT0026_152563_152598_36	XUT0026	3	TRUE	TRUE	FALSE	FALSE	FALSE	FALSE	FALSE	FALSE	FALSE
chr02	161378	161401	-	24	XUT0954_161378_161401_24	XUT0954	1	TRUE	TRUE	TRUE	FALSE	FALSE	FALSE	TRUE	TRUE	TRUE
chr02	160952	161305	-	354	XUT0954_160952_161305_354	XUT0954	3	TRUE	TRUE	FALSE	FALSE	FALSE	FALSE	FALSE	FALSE	FALSE
chr02	160775	160909	-	135	XUT0954_160775_160909_135	XUT0954	5	TRUE	TRUE	FALSE	FALSE	FALSE	FALSE	FALSE	FALSE	FALSE
chr02	160613	160684	-	72	XUT0954_160613_160684_72	XUT0954	8	TRUE	TRUE	FALSE	FALSE	FALSE	FALSE	FALSE	FALSE	FALSE
chr02	160385	160594	-	210	XUT0954_160385_160594_210	XUT0954	10	TRUE	TRUE	FALSE	FALSE	FALSE	FALSE	FALSE	FALSE	FALSE
chr02	159923	160093	-	171	XUT0954_159923_160093_171	XUT0954	15	TRUE	TRUE	FALSE	FALSE	FALSE	FALSE	FALSE	FALSE	FALSE
chr02	160909	161157	-	249	XUT0954_160909_161157_249	XUT0954	4	TRUE	TRUE	FALSE	FALSE	FALSE	FALSE	FALSE	FALSE	FALSE
chr02	160657	160857	-	201	XUT0954_160657_160857_201	XUT0954	6	TRUE	TRUE	FALSE	FALSE	FALSE	FALSE	FALSE	FALSE	FALSE
chr02	160576	160650	-	75	XUT0954_160576_160650_75	XUT0954	9	TRUE	TRUE	FALSE	FALSE	FALSE	FALSE	FALSE	FALSE	FALSE
chr02	160321	160494	-	174	XUT0954_160321_160494_174	XUT0954	11	TRUE	TRUE	FALSE	FALSE	FALSE	FALSE	FALSE	FALSE	FALSE
chr02	160111	160185	-	75	XUT0954_160111_160185_75	XUT0954	13	TRUE	TRUE	FALSE	FALSE	FALSE	FALSE	FALSE	FALSE	FALSE
chr02	159958	160047	-	90	XUT0954_159958_160047_90	XUT0954	17	TRUE	TRUE	FALSE	FALSE	FALSE	FALSE	FALSE	FALSE	FALSE
chr02	161247	161378	-	132	XUT0954_161247_161378_132	XUT0954	2	TRUE	TRUE	FALSE	FALSE	FALSE	TRUE	FALSE	TRUE	FALSE
chr02	160668	160691	-	24	XUT0954_160668_160691_24	XUT0954	7	TRUE	TRUE	FALSE	FALSE	FALSE	FALSE	FALSE	FALSE	FALSE
chr02	160317	160337	-	21	XUT0954_160317_160337_21	XUT0954	12	TRUE	TRUE	FALSE	FALSE	FALSE	FALSE	FALSE	FALSE	FALSE
chr02	160140	160166	-	27	XUT0954_160140_160166_27	XUT0954	14	TRUE	TRUE	FALSE	FALSE	FALSE	FALSE	FALSE	FALSE	FALSE
chr02	160035	160061	-	27	XUT0954_160035_160061_27	XUT0954	16	TRUE	TRUE	FALSE	FALSE	FALSE	FALSE	FALSE	FALSE	FALSE
chr02	164528	164671	+	144	XUT0027_164528_164671_144	XUT0027	1	FALSE	FALSE	TRUE	FALSE	TRUE	FALSE	TRUE	TRUE	TRUE
chr02	164762	164788	+	27	XUT0027_164762_164788_27	XUT0027	4	FALSE	FALSE	FALSE	FALSE	FALSE	FALSE	FALSE	FALSE	FALSE
chr02	164933	164989	+	57	XUT0027_164933_164989_57	XUT0027	5	FALSE	FALSE	FALSE	FALSE	FALSE	FALSE	FALSE	FALSE	FALSE
chr02	164724	164756	+	33	XUT0027_164724_164756_33	XUT0027	3	FALSE	FALSE	FALSE	FALSE	FALSE	FALSE	FALSE	FALSE	FALSE
chr02	164946	164975	+	30	XUT0027_164946_164975_30	XUT0027	6	FALSE	FALSE	FALSE	FALSE	FALSE	FALSE	FALSE	FALSE	FALSE
chr02	164704	164724	+	21	XUT0027_164704_164724_21	XUT0027	2	FALSE	FALSE	FALSE	FALSE	FALSE	FALSE	FALSE	FALSE	FALSE
chr02	166783	166833	-	51	XUT0955_166783_166833_51	XUT0955	2	TRUE	TRUE	FALSE	FALSE	FALSE	TRUE	FALSE	TRUE	FALSE
chr02	166489	166623	-	135	XUT0955_166489_166623_135	XUT0955	6	TRUE	TRUE	TRUE	FALSE	FALSE	TRUE	TRUE	TRUE	FALSE
chr02	166072	166203	-	132	XUT0955_166072_166203_132	XUT0955	12	TRUE	TRUE	FALSE	FALSE	FALSE	FALSE	FALSE	FALSE	FALSE
chr02	166851	166901	-	51	XUT0955_166851_166901_51	XUT0955	1	TRUE	TRUE	FALSE	FALSE	FALSE	FALSE	TRUE	TRUE	TRUE
chr02	166596	166643	-	48	XUT0955_166596_166643_48	XUT0955	5	TRUE	TRUE	FALSE	FALSE	FALSE	FALSE	FALSE	FALSE	FALSE
chr02	166311	166418	-	108	XUT0955_166311_166418_108	XUT0955	9	TRUE	TRUE	FALSE	FALSE	FALSE	FALSE	FALSE	FALSE	FALSE
chr02	166772	166795	-	24	XUT0955_166772_166795_24	XUT0955	3	TRUE	TRUE	FALSE	FALSE	FALSE	FALSE	FALSE	FALSE	FALSE
chr02	166526	166684	-	159	XUT0955_166526_166684_159	XUT0955	4	TRUE	TRUE	FALSE	FALSE	TRUE	FALSE	TRUE	TRUE	TRUE
chr02	166475	166522	-	48	XUT0955_166475_166522_48	XUT0955	7	TRUE	TRUE	FALSE	FALSE	FALSE	FALSE	FALSE	FALSE	FALSE
chr02	166418	166447	-	30	XUT0955_166418_166447_30	XUT0955	8	TRUE	TRUE	FALSE	FALSE	FALSE	FALSE	FALSE	FALSE	FALSE
chr02	166319	166360	-	42	XUT0955_166319_166360_42	XUT0955	10	TRUE	TRUE	FALSE	FALSE	FALSE	FALSE	FALSE	FALSE	FALSE
chr02	166190	166261	-	72	XUT0955_166190_166261_72	XUT0955	11	TRUE	TRUE	FALSE	FALSE	FALSE	FALSE	FALSE	FALSE	FALSE
chr02	170195	170239	-	45	XUT0957_170195_170239_45	XUT0957	1	FALSE	TRUE	FALSE	FALSE	FALSE	FALSE	FALSE	FALSE	FALSE
chr02	169946	170068	-	123	XUT0957_169946_170068_123	XUT0957	3	FALSE	TRUE	TRUE	FALSE	FALSE	FALSE	TRUE	TRUE	TRUE
chr02	169637	169870	-	234	XUT0957_169637_169870_234	XUT0957	4	FALSE	TRUE	TRUE	TRUE	TRUE	FALSE	TRUE	TRUE	TRUE
chr02	169418	169573	-	156	XUT0957_169418_169573_156	XUT0957	7	FALSE	TRUE	TRUE	FALSE	TRUE	FALSE	TRUE	TRUE	TRUE
chr02	170044	170118	-	75	XUT0957_170044_170118_75	XUT0957	2	FALSE	TRUE	TRUE	FALSE	FALSE	FALSE	FALSE	FALSE	FALSE
chr02	169705	169806	-	102	XUT0957_169705_169806_102	XUT0957	5	FALSE	TRUE	TRUE	TRUE	FALSE	TRUE	TRUE	TRUE	TRUE
chr02	169674	169787	-	114	XUT0957_169674_169787_114	XUT0957	6	FALSE	TRUE	TRUE	TRUE	FALSE	FALSE	TRUE	TRUE	TRUE
chr02	169398	169418	-	21	XUT0957_169398_169418_21	XUT0957	8	FALSE	TRUE	FALSE	FALSE	FALSE	FALSE	FALSE	FALSE	FALSE
chr02	171807	171875	-	69	XUT0958_171807_171875_69	XUT0958	4	TRUE	TRUE	FALSE	FALSE	FALSE	FALSE	FALSE	FALSE	FALSE
chr02	171735	171785	-	51	XUT0958_171735_171785_51	XUT0958	6	TRUE	TRUE	FALSE	FALSE	FALSE	FALSE	FALSE	FALSE	FALSE
chr02	171462	171668	-	207	XUT0958_171462_171668_207	XUT0958	8	TRUE	TRUE	FALSE	FALSE	FALSE	FALSE	FALSE	FALSE	FALSE
chr02	172040	172057	-	18	XUT0958_172040_172057_18	XUT0958	2	TRUE	TRUE	FALSE	FALSE	FALSE	FALSE	FALSE	FALSE	FALSE
chr02	171785	171865	-	81	XUT0958_171785_171865_81	XUT0958	5	TRUE	TRUE	FALSE	FALSE	FALSE	FALSE	FALSE	FALSE	FALSE
chr02	172018	172062	-	45	XUT0958_172018_172062_45	XUT0958	1	TRUE	TRUE	FALSE	FALSE	FALSE	FALSE	FALSE	FALSE	FALSE
chr02	171880	171900	-	21	XUT0958_171880_171900_21	XUT0958	3	TRUE	TRUE	FALSE	FALSE	FALSE	FALSE	FALSE	FALSE	FALSE
chr02	171721	171735	-	15	XUT0958_171721_171735_15	XUT0958	7	TRUE	TRUE	FALSE	FALSE	FALSE	FALSE	FALSE	FALSE	FALSE
chr02	171457	171537	-	81	XUT0958_171457_171537_81	XUT0958	9	TRUE	TRUE	FALSE	FALSE	FALSE	FALSE	FALSE	FALSE	FALSE
chr02	184475	184513	-	39	XUT0959_184475_184513_39	XUT0959	5	TRUE	TRUE	FALSE	FALSE	FALSE	FALSE	FALSE	FALSE	FALSE
chr02	184855	184869	-	15	XUT0959_184855_184869_15	XUT0959	1	TRUE	TRUE	FALSE	FALSE	FALSE	FALSE	FALSE	FALSE	FALSE
chr02	184642	184677	-	36	XUT0959_184642_184677_36	XUT0959	3	TRUE	TRUE	FALSE	FALSE	FALSE	FALSE	FALSE	FALSE	FALSE
chr02	184483	184521	-	39	XUT0959_184483_184521_39	XUT0959	4	TRUE	TRUE	FALSE	FALSE	FALSE	FALSE	FALSE	FALSE	FALSE
chr02	184426	184458	-	33	XUT0959_184426_184458_33	XUT0959	6	TRUE	TRUE	FALSE	FALSE	FALSE	FALSE	FALSE	FALSE	FALSE
chr02	184680	184739	-	60	XUT0959_184680_184739_60	XUT0959	2	TRUE	TRUE	FALSE	FALSE	FALSE	FALSE	FALSE	FALSE	FALSE
chr02	184413	184448	-	36	XUT0959_184413_184448_36	XUT0959	7	TRUE	TRUE	FALSE	FALSE	FALSE	FALSE	FALSE	FALSE	FALSE
chr02	209301	209390	-	90	XUT0960_209301_209390_90	XUT0960	1	TRUE	TRUE	FALSE	FALSE	FALSE	FALSE	FALSE	FALSE	FALSE
chr02	208695	208715	-	21	XUT0960_208695_208715_21	XUT0960	6	TRUE	TRUE	FALSE	FALSE	FALSE	FALSE	FALSE	FALSE	FALSE
chr02	208518	208553	-	36	XUT0960_208518_208553_36	XUT0960	8	TRUE	TRUE	FALSE	FALSE	FALSE	FALSE	FALSE	FALSE	FALSE
chr02	209198	209230	-	33	XUT0960_209198_209230_33	XUT0960	3	TRUE	TRUE	FALSE	FALSE	FALSE	FALSE	FALSE	FALSE	FALSE
chr02	209123	209143	-	21	XUT0960_209123_209143_21	XUT0960	4	TRUE	TRUE	FALSE	FALSE	FALSE	FALSE	FALSE	FALSE	FALSE
chr02	208391	208453	-	63	XUT0960_208391_208453_63	XUT0960	10	TRUE	TRUE	FALSE	FALSE	FALSE	FALSE	FALSE	FALSE	FALSE
chr02	209029	209298	-	270	XUT0960_209029_209298_270	XUT0960	2	TRUE	TRUE	FALSE	FALSE	TRUE	FALSE	TRUE	TRUE	TRUE
chr02	208936	208965	-	30	XUT0960_208936_208965_30	XUT0960	5	TRUE	TRUE	FALSE	FALSE	FALSE	FALSE	FALSE	FALSE	FALSE
chr02	208621	208698	-	78	XUT0960_208621_208698_78	XUT0960	7	TRUE	TRUE	FALSE	FALSE	FALSE	FALSE	FALSE	FALSE	FALSE
chr02	208453	208476	-	24	XUT0960_208453_208476_24	XUT0960	9	TRUE	TRUE	FALSE	FALSE	FALSE	FALSE	FALSE	FALSE	FALSE
chr02	220873	220893	-	21	XUT0961_220873_220893_21	XUT0961	1	TRUE	TRUE	TRUE	FALSE	FALSE	TRUE	FALSE	TRUE	TRUE
chr02	220333	220485	-	153	XUT0961_220333_220485_153	XUT0961	7	TRUE	TRUE	FALSE	FALSE	FALSE	FALSE	TRUE	TRUE	TRUE
chr02	219988	220212	-	225	XUT0961_219988_220212_225	XUT0961	11	TRUE	TRUE	FALSE	TRUE	FALSE	FALSE	FALSE	TRUE	FALSE
chr02	219397	219423	-	27	XUT0961_219397_219423_27	XUT0961	16	TRUE	TRUE	FALSE	FALSE	FALSE	FALSE	FALSE	FALSE	FALSE
chr02	219052	219126	-	75	XUT0961_219052_219126_75	XUT0961	19	TRUE	TRUE	TRUE	FALSE	FALSE	FALSE	FALSE	FALSE	FALSE
chr02	218725	218781	-	57	XUT0961_218725_218781_57	XUT0961	22	TRUE	TRUE	TRUE	FALSE	FALSE	FALSE	FALSE	FALSE	FALSE
chr02	218698	218712	-	15	XUT0961_218698_218712_15	XUT0961	23	TRUE	TRUE	FALSE	FALSE	FALSE	FALSE	FALSE	FALSE	FALSE
chr02	218575	218679	-	105	XUT0961_218575_218679_105	XUT0961	24	TRUE	TRUE	FALSE	FALSE	FALSE	TRUE	FALSE	TRUE	TRUE
chr02	218524	218553	-	30	XUT0961_218524_218553_30	XUT0961	27	TRUE	TRUE	FALSE	FALSE	FALSE	FALSE	FALSE	FALSE	FALSE
chr02	218473	218493	-	21	XUT0961_218473_218493_21	XUT0961	28	TRUE	TRUE	FALSE	FALSE	FALSE	FALSE	FALSE	FALSE	FALSE
chr02	218239	218265	-	27	XUT0961_218239_218265_27	XUT0961	33	TRUE	TRUE	FALSE	FALSE	FALSE	FALSE	FALSE	FALSE	FALSE
chr02	220800	220886	-	87	XUT0961_220800_220886_87	XUT0961	2	TRUE	TRUE	TRUE	FALSE	TRUE	TRUE	TRUE	TRUE	TRUE
chr02	220668	220760	-	93	XUT0961_220668_220760_93	XUT0961	4	TRUE	TRUE	TRUE	FALSE	TRUE	FALSE	TRUE	TRUE	TRUE
chr02	220545	220592	-	48	XUT0961_220545_220592_48	XUT0961	5	TRUE	TRUE	FALSE	FALSE	FALSE	TRUE	FALSE	TRUE	TRUE
chr02	220485	220511	-	27	XUT0961_220485_220511_27	XUT0961	6	TRUE	TRUE	TRUE	FALSE	FALSE	FALSE	TRUE	TRUE	FALSE
chr02	220398	220436	-	39	XUT0961_220398_220436_39	XUT0961	8	TRUE	TRUE	TRUE	FALSE	FALSE	TRUE	FALSE	TRUE	FALSE
chr02	220242	220262	-	21	XUT0961_220242_220262_21	XUT0961	9	TRUE	TRUE	FALSE	FALSE	FALSE	FALSE	FALSE	FALSE	FALSE
chr02	220200	220226	-	27	XUT0961_220200_220226_27	XUT0961	10	TRUE	TRUE	TRUE	FALSE	FALSE	FALSE	FALSE	FALSE	FALSE
chr02	219384	219413	-	30	XUT0961_219384_219413_30	XUT0961	17	TRUE	TRUE	FALSE	FALSE	FALSE	FALSE	FALSE	FALSE	FALSE
chr02	218991	219056	-	66	XUT0961_218991_219056_66	XUT0961	20	TRUE	TRUE	TRUE	FALSE	FALSE	FALSE	FALSE	FALSE	FALSE
chr02	218619	218642	-	24	XUT0961_218619_218642_24	XUT0961	25	TRUE	TRUE	FALSE	FALSE	FALSE	FALSE	FALSE	FALSE	FALSE
chr02	218553	218594	-	42	XUT0961_218553_218594_42	XUT0961	26	TRUE	TRUE	TRUE	FALSE	FALSE	FALSE	FALSE	FALSE	FALSE
chr02	218460	218477	-	18	XUT0961_218460_218477_18	XUT0961	29	TRUE	TRUE	FALSE	FALSE	FALSE	FALSE	FALSE	FALSE	FALSE
chr02	218307	218333	-	27	XUT0961_218307_218333_27	XUT0961	32	TRUE	TRUE	FALSE	FALSE	FALSE	FALSE	FALSE	FALSE	FALSE
chr02	220814	220873	-	60	XUT0961_220814_220873_60	XUT0961	3	TRUE	TRUE	TRUE	FALSE	FALSE	TRUE	FALSE	TRUE	TRUE
chr02	219833	219862	-	30	XUT0961_219833_219862_30	XUT0961	12	TRUE	TRUE	TRUE	FALSE	FALSE	TRUE	FALSE	TRUE	FALSE
chr02	219758	219814	-	57	XUT0961_219758_219814_57	XUT0961	13	TRUE	TRUE	FALSE	FALSE	FALSE	FALSE	FALSE	FALSE	FALSE
chr02	219638	219709	-	72	XUT0961_219638_219709_72	XUT0961	14	TRUE	TRUE	TRUE	FALSE	FALSE	FALSE	FALSE	FALSE	FALSE
chr02	219410	219502	-	93	XUT0961_219410_219502_93	XUT0961	15	TRUE	TRUE	FALSE	FALSE	FALSE	FALSE	FALSE	FALSE	FALSE
chr02	219200	219283	-	84	XUT0961_219200_219283_84	XUT0961	18	TRUE	TRUE	TRUE	FALSE	FALSE	TRUE	FALSE	TRUE	FALSE
chr02	219005	219049	-	45	XUT0961_219005_219049_45	XUT0961	21	TRUE	TRUE	TRUE	FALSE	FALSE	FALSE	FALSE	FALSE	FALSE
chr02	218384	218464	-	81	XUT0961_218384_218464_81	XUT0961	30	TRUE	TRUE	FALSE	FALSE	FALSE	FALSE	FALSE	FALSE	FALSE
chr02	218327	218350	-	24	XUT0961_218327_218350_24	XUT0961	31	TRUE	TRUE	FALSE	FALSE	FALSE	FALSE	FALSE	FALSE	FALSE
chr02	221557	221598	-	42	XUT0962_221557_221598_42	XUT0962	4	TRUE	TRUE	FALSE	FALSE	FALSE	FALSE	FALSE	FALSE	FALSE
chr02	221419	221433	-	15	XUT0962_221419_221433_15	XUT0962	6	TRUE	TRUE	FALSE	FALSE	FALSE	FALSE	FALSE	FALSE	FALSE
chr02	221721	221795	-	75	XUT0962_221721_221795_75	XUT0962	1	TRUE	TRUE	FALSE	FALSE	FALSE	FALSE	FALSE	FALSE	FALSE
chr02	221481	221651	-	171	XUT0962_221481_221651_171	XUT0962	3	TRUE	TRUE	FALSE	FALSE	FALSE	FALSE	FALSE	FALSE	FALSE
chr02	221714	221749	-	36	XUT0962_221714_221749_36	XUT0962	2	TRUE	TRUE	FALSE	FALSE	FALSE	FALSE	FALSE	FALSE	FALSE
chr02	221510	221536	-	27	XUT0962_221510_221536_27	XUT0962	5	TRUE	TRUE	FALSE	FALSE	FALSE	FALSE	FALSE	FALSE	FALSE
chr02	221348	221371	-	24	XUT0962_221348_221371_24	XUT0962	7	TRUE	TRUE	FALSE	FALSE	FALSE	FALSE	FALSE	FALSE	FALSE
chr02	227288	227335	+	48	XUT0029_227288_227335_48	XUT0029	2	FALSE	TRUE	FALSE	FALSE	FALSE	FALSE	FALSE	FALSE	FALSE
chr02	227193	227243	+	51	XUT0029_227193_227243_51	XUT0029	1	FALSE	TRUE	FALSE	FALSE	FALSE	FALSE	FALSE	FALSE	FALSE
chr02	227295	227375	+	81	XUT0029_227295_227375_81	XUT0029	3	FALSE	TRUE	FALSE	FALSE	FALSE	FALSE	FALSE	FALSE	FALSE
chr02	227344	227370	+	27	XUT0029_227344_227370_27	XUT0029	4	FALSE	TRUE	FALSE	FALSE	FALSE	FALSE	FALSE	FALSE	FALSE
chr02	238568	238618	+	51	XUT0031_238568_238618_51	XUT0031	2	FALSE	TRUE	TRUE	FALSE	FALSE	FALSE	FALSE	FALSE	FALSE
chr02	238691	238729	+	39	XUT0031_238691_238729_39	XUT0031	3	FALSE	TRUE	FALSE	FALSE	FALSE	FALSE	FALSE	FALSE	FALSE
chr02	238802	238819	+	18	XUT0031_238802_238819_18	XUT0031	6	FALSE	TRUE	FALSE	FALSE	FALSE	FALSE	FALSE	FALSE	FALSE
chr02	238482	238496	+	15	XUT0031_238482_238496_15	XUT0031	1	FALSE	TRUE	FALSE	FALSE	FALSE	FALSE	FALSE	FALSE	FALSE
chr02	238746	238802	+	57	XUT0031_238746_238802_57	XUT0031	5	FALSE	TRUE	FALSE	FALSE	FALSE	FALSE	FALSE	FALSE	FALSE
chr02	238735	238767	+	33	XUT0031_238735_238767_33	XUT0031	4	FALSE	TRUE	FALSE	FALSE	FALSE	FALSE	FALSE	FALSE	FALSE
chr02	241119	241190	+	72	XUT0032_241119_241190_72	XUT0032	1	TRUE	FALSE	FALSE	FALSE	FALSE	FALSE	FALSE	FALSE	FALSE
chr02	241213	241287	+	75	XUT0032_241213_241287_75	XUT0032	2	TRUE	FALSE	FALSE	FALSE	FALSE	FALSE	FALSE	FALSE	FALSE
chr02	246129	246158	-	30	XUT0963_246129_246158_30	XUT0963	1	TRUE	TRUE	FALSE	FALSE	FALSE	FALSE	FALSE	FALSE	FALSE
chr02	245988	246014	-	27	XUT0963_245988_246014_27	XUT0963	3	TRUE	TRUE	FALSE	FALSE	FALSE	FALSE	FALSE	FALSE	FALSE
chr02	245921	245965	-	45	XUT0963_245921_245965_45	XUT0963	4	TRUE	TRUE	FALSE	FALSE	FALSE	FALSE	FALSE	FALSE	FALSE
chr02	245995	246126	-	132	XUT0963_245995_246126_132	XUT0963	2	TRUE	TRUE	FALSE	FALSE	FALSE	FALSE	FALSE	FALSE	FALSE
chr02	247961	248065	-	105	XUT0964_247961_248065_105	XUT0964	6	TRUE	TRUE	FALSE	FALSE	FALSE	FALSE	FALSE	FALSE	FALSE
chr02	248455	248499	-	45	XUT0964_248455_248499_45	XUT0964	1	TRUE	TRUE	TRUE	FALSE	TRUE	FALSE	TRUE	TRUE	TRUE
chr02	247930	248079	-	150	XUT0964_247930_248079_150	XUT0964	5	TRUE	TRUE	FALSE	FALSE	FALSE	FALSE	FALSE	FALSE	FALSE
chr02	247852	247869	-	18	XUT0964_247852_247869_18	XUT0964	8	TRUE	TRUE	FALSE	FALSE	FALSE	FALSE	FALSE	FALSE	FALSE
chr02	247582	247824	-	243	XUT0964_247582_247824_243	XUT0964	9	TRUE	TRUE	FALSE	FALSE	FALSE	FALSE	FALSE	FALSE	FALSE
chr02	247441	247566	-	126	XUT0964_247441_247566_126	XUT0964	12	TRUE	TRUE	FALSE	FALSE	FALSE	FALSE	FALSE	FALSE	FALSE
chr02	247204	247311	-	108	XUT0964_247204_247311_108	XUT0964	14	TRUE	TRUE	FALSE	FALSE	FALSE	FALSE	FALSE	FALSE	FALSE
chr02	247075	247146	-	72	XUT0964_247075_247146_72	XUT0964	15	TRUE	TRUE	FALSE	FALSE	FALSE	FALSE	FALSE	FALSE	FALSE
chr02	248310	248357	-	48	XUT0964_248310_248357_48	XUT0964	2	TRUE	TRUE	FALSE	FALSE	FALSE	FALSE	FALSE	FALSE	FALSE
chr02	248262	248288	-	27	XUT0964_248262_248288_27	XUT0964	3	TRUE	TRUE	FALSE	FALSE	FALSE	FALSE	FALSE	FALSE	FALSE
chr02	248181	248210	-	30	XUT0964_248181_248210_30	XUT0964	4	TRUE	TRUE	FALSE	FALSE	FALSE	FALSE	FALSE	FALSE	FALSE
chr02	247884	247934	-	51	XUT0964_247884_247934_51	XUT0964	7	TRUE	TRUE	FALSE	FALSE	FALSE	FALSE	FALSE	FALSE	FALSE
chr02	247656	247694	-	39	XUT0964_247656_247694_39	XUT0964	10	TRUE	TRUE	FALSE	FALSE	FALSE	FALSE	FALSE	FALSE	FALSE
chr02	247569	247610	-	42	XUT0964_247569_247610_42	XUT0964	11	TRUE	TRUE	FALSE	FALSE	FALSE	FALSE	FALSE	FALSE	FALSE
chr02	247461	247496	-	36	XUT0964_247461_247496_36	XUT0964	13	TRUE	TRUE	FALSE	FALSE	FALSE	FALSE	FALSE	FALSE	FALSE
chr02	251219	251236	+	18	XUT0033_251219_251236_18	XUT0033	2	TRUE	TRUE	FALSE	FALSE	FALSE	FALSE	FALSE	FALSE	FALSE
chr02	251621	251728	+	108	XUT0033_251621_251728_108	XUT0033	7	TRUE	TRUE	FALSE	FALSE	FALSE	FALSE	FALSE	FALSE	FALSE
chr02	251807	251875	+	69	XUT0033_251807_251875_69	XUT0033	8	TRUE	TRUE	TRUE	FALSE	FALSE	TRUE	TRUE	TRUE	TRUE
chr02	251939	252010	+	72	XUT0033_251939_252010_72	XUT0033	10	TRUE	TRUE	FALSE	FALSE	FALSE	FALSE	FALSE	FALSE	FALSE
chr02	251181	251231	+	51	XUT0033_251181_251231_51	XUT0033	1	TRUE	TRUE	FALSE	FALSE	FALSE	FALSE	FALSE	FALSE	FALSE
chr02	251490	251582	+	93	XUT0033_251490_251582_93	XUT0033	5	TRUE	TRUE	FALSE	FALSE	FALSE	FALSE	FALSE	FALSE	FALSE
chr02	251853	251939	+	87	XUT0033_251853_251939_87	XUT0033	9	TRUE	TRUE	TRUE	FALSE	TRUE	FALSE	TRUE	TRUE	TRUE
chr02	252030	252101	+	72	XUT0033_252030_252101_72	XUT0033	12	TRUE	TRUE	FALSE	FALSE	FALSE	FALSE	FALSE	FALSE	FALSE
chr02	251350	251394	+	45	XUT0033_251350_251394_45	XUT0033	3	TRUE	TRUE	FALSE	FALSE	FALSE	FALSE	FALSE	FALSE	FALSE
chr02	251431	251487	+	57	XUT0033_251431_251487_57	XUT0033	4	TRUE	TRUE	FALSE	FALSE	FALSE	FALSE	FALSE	FALSE	FALSE
chr02	251533	251748	+	216	XUT0033_251533_251748_216	XUT0033	6	TRUE	TRUE	FALSE	FALSE	FALSE	FALSE	FALSE	FALSE	FALSE
chr02	251980	252030	+	51	XUT0033_251980_252030_51	XUT0033	11	TRUE	TRUE	FALSE	FALSE	FALSE	FALSE	FALSE	FALSE	FALSE
chr02	252136	252177	+	42	XUT0033_252136_252177_42	XUT0033	13	TRUE	TRUE	FALSE	FALSE	FALSE	FALSE	FALSE	FALSE	FALSE
chr02	253129	253203	+	75	XUT0034_253129_253203_75	XUT0034	2	FALSE	TRUE	FALSE	FALSE	FALSE	FALSE	FALSE	FALSE	FALSE
chr02	253579	253599	+	21	XUT0034_253579_253599_21	XUT0034	5	FALSE	TRUE	FALSE	FALSE	FALSE	FALSE	FALSE	FALSE	FALSE
chr02	253783	253863	+	81	XUT0034_253783_253863_81	XUT0034	9	FALSE	TRUE	FALSE	FALSE	FALSE	FALSE	FALSE	FALSE	FALSE
chr02	253900	253965	+	66	XUT0034_253900_253965_66	XUT0034	12	FALSE	TRUE	FALSE	FALSE	FALSE	FALSE	FALSE	FALSE	FALSE
chr02	254314	254370	+	57	XUT0034_254314_254370_57	XUT0034	14	FALSE	TRUE	FALSE	FALSE	FALSE	FALSE	FALSE	FALSE	FALSE
chr02	254737	254934	+	198	XUT0034_254737_254934_198	XUT0034	17	FALSE	TRUE	FALSE	FALSE	TRUE	FALSE	TRUE	TRUE	TRUE
chr02	253349	253402	+	54	XUT0034_253349_253402_54	XUT0034	3	FALSE	TRUE	FALSE	FALSE	FALSE	FALSE	FALSE	FALSE	FALSE
chr02	253634	253675	+	42	XUT0034_253634_253675_42	XUT0034	6	FALSE	TRUE	FALSE	FALSE	FALSE	FALSE	FALSE	FALSE	FALSE
chr02	253796	253876	+	81	XUT0034_253796_253876_81	XUT0034	10	FALSE	TRUE	FALSE	FALSE	FALSE	FALSE	FALSE	FALSE	FALSE
chr02	254378	254446	+	69	XUT0034_254378_254446_69	XUT0034	15	FALSE	TRUE	FALSE	FALSE	FALSE	FALSE	FALSE	FALSE	FALSE
chr02	254777	254866	+	90	XUT0034_254777_254866_90	XUT0034	18	FALSE	TRUE	TRUE	FALSE	FALSE	FALSE	FALSE	FALSE	FALSE
chr02	253014	253037	+	24	XUT0034_253014_253037_24	XUT0034	1	FALSE	TRUE	FALSE	FALSE	FALSE	FALSE	FALSE	FALSE	FALSE
chr02	253425	253655	+	231	XUT0034_253425_253655_231	XUT0034	4	FALSE	TRUE	FALSE	FALSE	FALSE	FALSE	FALSE	FALSE	FALSE
chr02	253665	253706	+	42	XUT0034_253665_253706_42	XUT0034	7	FALSE	TRUE	FALSE	FALSE	FALSE	FALSE	FALSE	FALSE	FALSE
chr02	253737	253754	+	18	XUT0034_253737_253754_18	XUT0034	8	FALSE	TRUE	FALSE	FALSE	FALSE	FALSE	FALSE	FALSE	FALSE
chr02	253845	254057	+	213	XUT0034_253845_254057_213	XUT0034	11	FALSE	TRUE	TRUE	FALSE	FALSE	FALSE	FALSE	FALSE	FALSE
chr02	254259	254273	+	15	XUT0034_254259_254273_15	XUT0034	13	FALSE	TRUE	FALSE	FALSE	FALSE	FALSE	FALSE	FALSE	FALSE
chr02	254526	254786	+	261	XUT0034_254526_254786_261	XUT0034	16	FALSE	TRUE	TRUE	FALSE	TRUE	FALSE	FALSE	TRUE	FALSE
chr02	255991	256071	-	81	XUT0965_255991_256071_81	XUT0965	1	TRUE	TRUE	TRUE	FALSE	TRUE	FALSE	FALSE	TRUE	FALSE
chr02	258364	258444	+	81	XUT0035_258364_258444_81	XUT0035	2	TRUE	TRUE	FALSE	FALSE	FALSE	FALSE	FALSE	FALSE	FALSE
chr02	258934	258948	+	15	XUT0035_258934_258948_15	XUT0035	8	TRUE	TRUE	FALSE	FALSE	FALSE	FALSE	FALSE	FALSE	FALSE
chr02	258281	258343	+	63	XUT0035_258281_258343_63	XUT0035	1	TRUE	TRUE	TRUE	FALSE	FALSE	FALSE	TRUE	TRUE	TRUE
chr02	258491	258535	+	45	XUT0035_258491_258535_45	XUT0035	4	TRUE	TRUE	FALSE	FALSE	FALSE	FALSE	FALSE	FALSE	FALSE
chr02	258896	258934	+	39	XUT0035_258896_258934_39	XUT0035	7	TRUE	TRUE	FALSE	FALSE	FALSE	FALSE	FALSE	FALSE	FALSE
chr02	258483	258602	+	120	XUT0035_258483_258602_120	XUT0035	3	TRUE	TRUE	FALSE	FALSE	FALSE	FALSE	FALSE	FALSE	FALSE
chr02	258669	258689	+	21	XUT0035_258669_258689_21	XUT0035	5	TRUE	TRUE	FALSE	FALSE	FALSE	FALSE	FALSE	FALSE	FALSE
chr02	258834	258923	+	90	XUT0035_258834_258923_90	XUT0035	6	TRUE	TRUE	FALSE	FALSE	FALSE	FALSE	FALSE	FALSE	FALSE
chr02	260227	260322	-	96	XUT0966_260227_260322_96	XUT0966	1	TRUE	FALSE	FALSE	FALSE	FALSE	FALSE	FALSE	FALSE	FALSE
chr02	260020	260190	-	171	XUT0966_260020_260190_171	XUT0966	2	TRUE	FALSE	FALSE	FALSE	FALSE	FALSE	FALSE	FALSE	FALSE
chr02	260052	260075	-	24	XUT0966_260052_260075_24	XUT0966	4	TRUE	FALSE	FALSE	FALSE	FALSE	FALSE	FALSE	FALSE	FALSE
chr02	259887	259910	-	24	XUT0966_259887_259910_24	XUT0966	5	TRUE	FALSE	FALSE	FALSE	FALSE	FALSE	FALSE	FALSE	FALSE
chr02	260087	260137	-	51	XUT0966_260087_260137_51	XUT0966	3	TRUE	FALSE	FALSE	FALSE	FALSE	FALSE	FALSE	FALSE	FALSE
chr02	280883	280912	-	30	XUT0967_280883_280912_30	XUT0967	2	TRUE	TRUE	TRUE	FALSE	FALSE	FALSE	FALSE	FALSE	FALSE
chr02	280784	280861	-	78	XUT0967_280784_280861_78	XUT0967	4	TRUE	TRUE	TRUE	FALSE	FALSE	FALSE	FALSE	FALSE	FALSE
chr02	280514	280648	-	135	XUT0967_280514_280648_135	XUT0967	6	TRUE	TRUE	FALSE	FALSE	FALSE	FALSE	FALSE	FALSE	FALSE
chr02	280448	280477	-	30	XUT0967_280448_280477_30	XUT0967	7	TRUE	TRUE	FALSE	FALSE	FALSE	FALSE	FALSE	FALSE	FALSE
chr02	280343	280381	-	39	XUT0967_280343_280381_39	XUT0967	9	TRUE	TRUE	FALSE	FALSE	FALSE	FALSE	FALSE	FALSE	FALSE
chr02	279986	280027	-	42	XUT0967_279986_280027_42	XUT0967	12	TRUE	TRUE	FALSE	FALSE	FALSE	FALSE	FALSE	FALSE	FALSE
chr02	279842	279961	-	120	XUT0967_279842_279961_120	XUT0967	13	TRUE	TRUE	FALSE	FALSE	FALSE	FALSE	FALSE	FALSE	FALSE
chr02	279425	279544	-	120	XUT0967_279425_279544_120	XUT0967	16	TRUE	TRUE	FALSE	FALSE	FALSE	FALSE	FALSE	FALSE	FALSE
chr02	279209	279292	-	84	XUT0967_279209_279292_84	XUT0967	19	TRUE	TRUE	FALSE	FALSE	FALSE	FALSE	FALSE	FALSE	FALSE
chr02	279035	279115	-	81	XUT0967_279035_279115_81	XUT0967	21	TRUE	TRUE	FALSE	FALSE	FALSE	FALSE	FALSE	FALSE	FALSE
chr02	280852	280875	-	24	XUT0967_280852_280875_24	XUT0967	3	TRUE	TRUE	FALSE	FALSE	FALSE	FALSE	FALSE	FALSE	FALSE
chr02	280648	280719	-	72	XUT0967_280648_280719_72	XUT0967	5	TRUE	TRUE	FALSE	FALSE	FALSE	FALSE	FALSE	FALSE	FALSE
chr02	280291	280401	-	111	XUT0967_280291_280401_111	XUT0967	8	TRUE	TRUE	TRUE	FALSE	FALSE	FALSE	FALSE	FALSE	FALSE
chr02	280141	280161	-	21	XUT0967_280141_280161_21	XUT0967	11	TRUE	TRUE	FALSE	FALSE	FALSE	FALSE	FALSE	FALSE	FALSE
chr02	279403	279540	-	138	XUT0967_279403_279540_138	XUT0967	17	TRUE	TRUE	TRUE	FALSE	FALSE	FALSE	FALSE	FALSE	FALSE
chr02	279265	279288	-	24	XUT0967_279265_279288_24	XUT0967	20	TRUE	TRUE	FALSE	FALSE	FALSE	FALSE	FALSE	FALSE	FALSE
chr02	279070	279093	-	24	XUT0967_279070_279093_24	XUT0967	22	TRUE	TRUE	FALSE	FALSE	FALSE	FALSE	FALSE	FALSE	FALSE
chr02	280872	280925	-	54	XUT0967_280872_280925_54	XUT0967	1	TRUE	TRUE	TRUE	FALSE	FALSE	FALSE	TRUE	TRUE	TRUE
chr02	280191	280208	-	18	XUT0967_280191_280208_18	XUT0967	10	TRUE	TRUE	FALSE	FALSE	FALSE	FALSE	FALSE	FALSE	FALSE
chr02	279615	279704	-	90	XUT0967_279615_279704_90	XUT0967	14	TRUE	TRUE	FALSE	FALSE	FALSE	FALSE	FALSE	FALSE	FALSE
chr02	279561	279596	-	36	XUT0967_279561_279596_36	XUT0967	15	TRUE	TRUE	FALSE	FALSE	FALSE	FALSE	FALSE	FALSE	FALSE
chr02	279300	279416	-	117	XUT0967_279300_279416_117	XUT0967	18	TRUE	TRUE	FALSE	FALSE	FALSE	FALSE	FALSE	FALSE	FALSE
chr02	278967	279035	-	69	XUT0967_278967_279035_69	XUT0967	23	TRUE	TRUE	FALSE	FALSE	FALSE	FALSE	FALSE	FALSE	FALSE
chr02	283887	283934	-	48	XUT0968_283887_283934_48	XUT0968	1	TRUE	TRUE	TRUE	FALSE	FALSE	FALSE	FALSE	FALSE	FALSE
chr02	283755	283802	-	48	XUT0968_283755_283802_48	XUT0968	3	TRUE	TRUE	FALSE	FALSE	FALSE	FALSE	FALSE	FALSE	FALSE
chr02	283728	283748	-	21	XUT0968_283728_283748_21	XUT0968	5	TRUE	TRUE	FALSE	FALSE	FALSE	FALSE	FALSE	FALSE	FALSE
chr02	283446	283460	-	15	XUT0968_283446_283460_15	XUT0968	9	TRUE	TRUE	FALSE	FALSE	FALSE	FALSE	FALSE	FALSE	FALSE
chr02	283760	283786	-	27	XUT0968_283760_283786_27	XUT0968	4	TRUE	TRUE	FALSE	FALSE	FALSE	FALSE	FALSE	FALSE	FALSE
chr02	283484	283528	-	45	XUT0968_283484_283528_45	XUT0968	7	TRUE	TRUE	TRUE	FALSE	FALSE	FALSE	FALSE	FALSE	FALSE
chr02	283786	283806	-	21	XUT0968_283786_283806_21	XUT0968	2	TRUE	TRUE	FALSE	FALSE	FALSE	FALSE	FALSE	FALSE	FALSE
chr02	283699	283725	-	27	XUT0968_283699_283725_27	XUT0968	6	TRUE	TRUE	FALSE	FALSE	FALSE	FALSE	FALSE	FALSE	FALSE
chr02	283432	283491	-	60	XUT0968_283432_283491_60	XUT0968	8	TRUE	TRUE	TRUE	FALSE	FALSE	FALSE	FALSE	FALSE	FALSE
chr02	288307	288375	+	69	XUT0037_288307_288375_69	XUT0037	1	TRUE	TRUE	TRUE	FALSE	TRUE	TRUE	FALSE	TRUE	TRUE
chr02	288430	288459	+	30	XUT0037_288430_288459_30	XUT0037	2	TRUE	TRUE	FALSE	FALSE	FALSE	FALSE	FALSE	FALSE	FALSE
chr02	288793	288813	+	21	XUT0037_288793_288813_21	XUT0037	4	TRUE	TRUE	FALSE	FALSE	FALSE	FALSE	FALSE	FALSE	FALSE
chr02	288518	288643	+	126	XUT0037_288518_288643_126	XUT0037	3	TRUE	TRUE	FALSE	FALSE	FALSE	FALSE	FALSE	FALSE	FALSE
chr02	289129	289146	-	18	XUT0969_289129_289146_18	XUT0969	1	TRUE	TRUE	FALSE	FALSE	FALSE	FALSE	FALSE	FALSE	FALSE
chr02	288496	288576	-	81	XUT0969_288496_288576_81	XUT0969	6	TRUE	TRUE	FALSE	FALSE	FALSE	FALSE	FALSE	FALSE	FALSE
chr02	288669	288731	-	63	XUT0969_288669_288731_63	XUT0969	5	TRUE	TRUE	FALSE	FALSE	FALSE	FALSE	FALSE	FALSE	FALSE
chr02	289112	289129	-	18	XUT0969_289112_289129_18	XUT0969	2	TRUE	TRUE	FALSE	FALSE	FALSE	FALSE	FALSE	FALSE	FALSE
chr02	288830	288913	-	84	XUT0969_288830_288913_84	XUT0969	3	TRUE	TRUE	FALSE	FALSE	FALSE	FALSE	FALSE	FALSE	FALSE
chr02	288725	288787	-	63	XUT0969_288725_288787_63	XUT0969	4	TRUE	TRUE	FALSE	FALSE	FALSE	FALSE	FALSE	FALSE	FALSE
chr02	292071	292169	+	99	XUT0038_292071_292169_99	XUT0038	2	FALSE	TRUE	FALSE	FALSE	FALSE	FALSE	FALSE	FALSE	FALSE
chr02	292464	292487	+	24	XUT0038_292464_292487_24	XUT0038	4	FALSE	TRUE	FALSE	FALSE	FALSE	FALSE	FALSE	FALSE	FALSE
chr02	292606	292632	+	27	XUT0038_292606_292632_27	XUT0038	6	FALSE	TRUE	FALSE	FALSE	FALSE	FALSE	FALSE	FALSE	FALSE
chr02	292007	292021	+	15	XUT0038_292007_292021_15	XUT0038	1	FALSE	TRUE	FALSE	FALSE	FALSE	FALSE	FALSE	FALSE	FALSE
chr02	292442	292456	+	15	XUT0038_292442_292456_15	XUT0038	3	FALSE	TRUE	FALSE	FALSE	FALSE	FALSE	FALSE	FALSE	FALSE
chr02	292490	292513	+	24	XUT0038_292490_292513_24	XUT0038	5	FALSE	TRUE	FALSE	FALSE	FALSE	FALSE	FALSE	FALSE	FALSE
chr02	292673	292690	+	18	XUT0038_292673_292690_18	XUT0038	7	FALSE	TRUE	FALSE	FALSE	FALSE	FALSE	FALSE	FALSE	FALSE
chr02	306295	306432	+	138	XUT0039_306295_306432_138	XUT0039	1	FALSE	TRUE	FALSE	FALSE	FALSE	FALSE	FALSE	FALSE	FALSE
chr02	306511	306543	+	33	XUT0039_306511_306543_33	XUT0039	4	FALSE	TRUE	FALSE	FALSE	FALSE	FALSE	FALSE	FALSE	FALSE
chr02	306335	306466	+	132	XUT0039_306335_306466_132	XUT0039	2	FALSE	TRUE	FALSE	FALSE	TRUE	FALSE	FALSE	TRUE	FALSE
chr02	306575	306760	+	186	XUT0039_306575_306760_186	XUT0039	5	FALSE	TRUE	FALSE	FALSE	FALSE	FALSE	FALSE	FALSE	FALSE
chr02	306417	306662	+	246	XUT0039_306417_306662_246	XUT0039	3	FALSE	TRUE	TRUE	FALSE	FALSE	FALSE	FALSE	FALSE	FALSE
chr02	306918	306971	+	54	XUT0039_306918_306971_54	XUT0039	6	FALSE	TRUE	FALSE	FALSE	FALSE	FALSE	FALSE	FALSE	FALSE
chr02	321307	321336	+	30	XUT0040_321307_321336_30	XUT0040	2	TRUE	TRUE	FALSE	FALSE	FALSE	FALSE	FALSE	FALSE	FALSE
chr02	321586	321675	+	90	XUT0040_321586_321675_90	XUT0040	5	TRUE	TRUE	FALSE	FALSE	FALSE	FALSE	FALSE	FALSE	FALSE
chr02	321688	321735	+	48	XUT0040_321688_321735_48	XUT0040	6	TRUE	TRUE	FALSE	FALSE	FALSE	FALSE	FALSE	FALSE	FALSE
chr02	321811	321837	+	27	XUT0040_321811_321837_27	XUT0040	8	TRUE	TRUE	FALSE	FALSE	FALSE	FALSE	FALSE	FALSE	FALSE
chr02	321284	321307	+	24	XUT0040_321284_321307_24	XUT0040	1	TRUE	TRUE	FALSE	FALSE	FALSE	FALSE	FALSE	FALSE	FALSE
chr02	321413	321487	+	75	XUT0040_321413_321487_75	XUT0040	4	TRUE	TRUE	FALSE	FALSE	FALSE	FALSE	FALSE	FALSE	FALSE
chr02	321719	321757	+	39	XUT0040_321719_321757_39	XUT0040	7	TRUE	TRUE	FALSE	FALSE	FALSE	FALSE	FALSE	FALSE	FALSE
chr02	321393	321431	+	39	XUT0040_321393_321431_39	XUT0040	3	TRUE	TRUE	FALSE	FALSE	FALSE	FALSE	FALSE	FALSE	FALSE
chr02	324411	324566	+	156	XUT0041_324411_324566_156	XUT0041	1	TRUE	TRUE	TRUE	FALSE	FALSE	FALSE	FALSE	FALSE	FALSE
chr02	324639	324719	+	81	XUT0041_324639_324719_81	XUT0041	3	TRUE	TRUE	FALSE	FALSE	FALSE	FALSE	FALSE	FALSE	FALSE
chr02	324729	324749	+	21	XUT0041_324729_324749_21	XUT0041	4	TRUE	TRUE	FALSE	FALSE	FALSE	FALSE	FALSE	FALSE	FALSE
chr02	324825	324947	+	123	XUT0041_324825_324947_123	XUT0041	6	TRUE	TRUE	FALSE	FALSE	FALSE	FALSE	FALSE	FALSE	FALSE
chr02	324454	324537	+	84	XUT0041_324454_324537_84	XUT0041	2	TRUE	TRUE	TRUE	FALSE	FALSE	FALSE	FALSE	FALSE	FALSE
chr02	324907	325041	+	135	XUT0041_324907_325041_135	XUT0041	7	TRUE	TRUE	FALSE	FALSE	FALSE	FALSE	FALSE	FALSE	FALSE
chr02	325159	325188	+	30	XUT0041_325159_325188_30	XUT0041	8	TRUE	TRUE	FALSE	FALSE	FALSE	FALSE	FALSE	FALSE	FALSE
chr02	324815	324829	+	15	XUT0041_324815_324829_15	XUT0041	5	TRUE	TRUE	FALSE	FALSE	FALSE	FALSE	FALSE	FALSE	FALSE
chr02	329936	329950	+	15	XUT0042_329936_329950_15	XUT0042	4	TRUE	TRUE	FALSE	FALSE	FALSE	FALSE	FALSE	FALSE	FALSE
chr02	329978	330031	+	54	XUT0042_329978_330031_54	XUT0042	5	TRUE	TRUE	FALSE	FALSE	FALSE	FALSE	FALSE	FALSE	FALSE
chr02	329496	329516	+	21	XUT0042_329496_329516_21	XUT0042	1	TRUE	TRUE	FALSE	FALSE	FALSE	FALSE	FALSE	FALSE	FALSE
chr02	329607	329693	+	87	XUT0042_329607_329693_87	XUT0042	2	TRUE	TRUE	FALSE	FALSE	FALSE	FALSE	FALSE	FALSE	FALSE
chr02	329745	329975	+	231	XUT0042_329745_329975_231	XUT0042	3	TRUE	TRUE	FALSE	FALSE	FALSE	FALSE	FALSE	FALSE	FALSE
chr02	329988	330095	+	108	XUT0042_329988_330095_108	XUT0042	6	TRUE	TRUE	FALSE	FALSE	FALSE	FALSE	FALSE	FALSE	FALSE
chr02	330195	330218	+	24	XUT0042_330195_330218_24	XUT0042	7	TRUE	TRUE	FALSE	FALSE	FALSE	FALSE	FALSE	FALSE	FALSE
chr02	336708	336737	+	30	XUT0043_336708_336737_30	XUT0043	2	TRUE	TRUE	FALSE	FALSE	FALSE	FALSE	FALSE	FALSE	FALSE
chr02	336904	336924	+	21	XUT0043_336904_336924_21	XUT0043	3	TRUE	TRUE	FALSE	FALSE	FALSE	FALSE	FALSE	FALSE	FALSE
chr02	336557	336580	+	24	XUT0043_336557_336580_24	XUT0043	1	TRUE	TRUE	FALSE	FALSE	FALSE	FALSE	FALSE	FALSE	FALSE
chr02	337226	337294	+	69	XUT0044_337226_337294_69	XUT0044	1	FALSE	TRUE	FALSE	FALSE	FALSE	FALSE	FALSE	FALSE	FALSE
chr02	337337	337444	+	108	XUT0044_337337_337444_108	XUT0044	3	FALSE	TRUE	FALSE	FALSE	FALSE	FALSE	FALSE	FALSE	FALSE
chr02	337472	337516	+	45	XUT0044_337472_337516_45	XUT0044	4	FALSE	TRUE	FALSE	FALSE	FALSE	FALSE	FALSE	FALSE	FALSE
chr02	337643	337777	+	135	XUT0044_337643_337777_135	XUT0044	5	FALSE	TRUE	FALSE	FALSE	FALSE	FALSE	FALSE	FALSE	FALSE
chr02	337327	337344	+	18	XUT0044_337327_337344_18	XUT0044	2	FALSE	TRUE	FALSE	FALSE	FALSE	FALSE	FALSE	FALSE	FALSE
chr02	341363	341392	+	30	XUT0045_341363_341392_30	XUT0045	4	TRUE	TRUE	FALSE	FALSE	FALSE	FALSE	FALSE	FALSE	FALSE
chr02	341780	341830	+	51	XUT0045_341780_341830_51	XUT0045	8	TRUE	TRUE	FALSE	FALSE	FALSE	FALSE	FALSE	FALSE	FALSE
chr02	341160	341285	+	126	XUT0045_341160_341285_126	XUT0045	1	TRUE	TRUE	FALSE	FALSE	FALSE	FALSE	FALSE	FALSE	FALSE
chr02	341295	341339	+	45	XUT0045_341295_341339_45	XUT0045	2	TRUE	TRUE	FALSE	FALSE	FALSE	FALSE	FALSE	FALSE	FALSE
chr02	341352	341366	+	15	XUT0045_341352_341366_15	XUT0045	3	TRUE	TRUE	FALSE	FALSE	FALSE	FALSE	FALSE	FALSE	FALSE
chr02	341544	341564	+	21	XUT0045_341544_341564_21	XUT0045	6	TRUE	TRUE	TRUE	FALSE	TRUE	FALSE	FALSE	TRUE	TRUE
chr02	341982	342095	+	114	XUT0045_341982_342095_114	XUT0045	11	TRUE	TRUE	FALSE	FALSE	FALSE	FALSE	FALSE	FALSE	FALSE
chr02	341383	341448	+	66	XUT0045_341383_341448_66	XUT0045	5	TRUE	TRUE	FALSE	FALSE	FALSE	FALSE	FALSE	FALSE	FALSE
chr02	341611	341634	+	24	XUT0045_341611_341634_24	XUT0045	7	TRUE	TRUE	FALSE	FALSE	FALSE	FALSE	FALSE	FALSE	FALSE
chr02	341851	341868	+	18	XUT0045_341851_341868_18	XUT0045	9	TRUE	TRUE	FALSE	FALSE	FALSE	FALSE	FALSE	FALSE	FALSE
chr02	341893	342039	+	147	XUT0045_341893_342039_147	XUT0045	10	TRUE	TRUE	FALSE	FALSE	FALSE	FALSE	FALSE	FALSE	FALSE
chr02	341567	341665	-	99	XUT0970_341567_341665_99	XUT0970	3	FALSE	FALSE	FALSE	FALSE	FALSE	FALSE	FALSE	FALSE	FALSE
chr02	341689	341796	-	108	XUT0970_341689_341796_108	XUT0970	1	FALSE	FALSE	FALSE	FALSE	FALSE	FALSE	FALSE	FALSE	FALSE
chr02	341557	341580	-	24	XUT0970_341557_341580_24	XUT0970	4	FALSE	FALSE	FALSE	FALSE	FALSE	FALSE	FALSE	FALSE	FALSE
chr02	341628	341789	-	162	XUT0970_341628_341789_162	XUT0970	2	FALSE	FALSE	FALSE	FALSE	FALSE	FALSE	FALSE	FALSE	FALSE
chr02	343882	343968	-	87	XUT0971_343882_343968_87	XUT0971	1	TRUE	TRUE	TRUE	FALSE	TRUE	FALSE	FALSE	TRUE	TRUE
chr02	343486	343515	-	30	XUT0971_343486_343515_30	XUT0971	6	TRUE	TRUE	FALSE	FALSE	FALSE	FALSE	FALSE	FALSE	FALSE
chr02	343447	343476	-	30	XUT0971_343447_343476_30	XUT0971	7	TRUE	TRUE	FALSE	FALSE	FALSE	FALSE	FALSE	FALSE	FALSE
chr02	343911	343937	-	27	XUT0971_343911_343937_27	XUT0971	2	TRUE	TRUE	FALSE	FALSE	FALSE	FALSE	FALSE	FALSE	FALSE
chr02	343329	343391	-	63	XUT0971_343329_343391_63	XUT0971	8	TRUE	TRUE	FALSE	FALSE	FALSE	FALSE	FALSE	FALSE	FALSE
chr02	343823	343870	-	48	XUT0971_343823_343870_48	XUT0971	3	TRUE	TRUE	FALSE	FALSE	FALSE	FALSE	FALSE	FALSE	FALSE
chr02	343757	343816	-	60	XUT0971_343757_343816_60	XUT0971	4	TRUE	TRUE	FALSE	FALSE	FALSE	FALSE	FALSE	FALSE	FALSE
chr02	343613	343735	-	123	XUT0971_343613_343735_123	XUT0971	5	TRUE	TRUE	TRUE	FALSE	FALSE	FALSE	TRUE	TRUE	FALSE
chr02	343298	343324	-	27	XUT0971_343298_343324_27	XUT0971	9	TRUE	TRUE	FALSE	FALSE	FALSE	FALSE	FALSE	FALSE	FALSE
chr02	343112	343183	-	72	XUT0971_343112_343183_72	XUT0971	10	TRUE	TRUE	FALSE	FALSE	FALSE	FALSE	FALSE	FALSE	FALSE
chr02	343052	343096	-	45	XUT0971_343052_343096_45	XUT0971	11	TRUE	TRUE	FALSE	FALSE	FALSE	FALSE	FALSE	FALSE	FALSE
chr02	350483	350500	-	18	XUT0973_350483_350500_18	XUT0973	3	TRUE	TRUE	FALSE	FALSE	FALSE	FALSE	FALSE	FALSE	FALSE
chr02	350384	350401	-	18	XUT0973_350384_350401_18	XUT0973	4	TRUE	TRUE	FALSE	FALSE	FALSE	FALSE	FALSE	FALSE	FALSE
chr02	349979	350014	-	36	XUT0973_349979_350014_36	XUT0973	9	TRUE	TRUE	FALSE	FALSE	FALSE	FALSE	FALSE	FALSE	FALSE
chr02	349958	349972	-	15	XUT0973_349958_349972_15	XUT0973	11	TRUE	TRUE	FALSE	FALSE	FALSE	FALSE	FALSE	FALSE	FALSE
chr02	350500	350541	-	42	XUT0973_350500_350541_42	XUT0973	2	TRUE	TRUE	FALSE	FALSE	FALSE	FALSE	FALSE	FALSE	FALSE
chr02	350167	350271	-	105	XUT0973_350167_350271_105	XUT0973	6	TRUE	TRUE	FALSE	FALSE	FALSE	FALSE	FALSE	FALSE	FALSE
chr02	350008	350058	-	51	XUT0973_350008_350058_51	XUT0973	8	TRUE	TRUE	FALSE	FALSE	FALSE	FALSE	FALSE	FALSE	FALSE
chr02	349972	349995	-	24	XUT0973_349972_349995_24	XUT0973	10	TRUE	TRUE	FALSE	FALSE	FALSE	FALSE	FALSE	FALSE	FALSE
chr02	350619	350741	-	123	XUT0973_350619_350741_123	XUT0973	1	TRUE	TRUE	TRUE	FALSE	TRUE	FALSE	TRUE	TRUE	TRUE
chr02	350223	350285	-	63	XUT0973_350223_350285_63	XUT0973	5	TRUE	TRUE	FALSE	FALSE	FALSE	FALSE	FALSE	FALSE	FALSE
chr02	350163	350216	-	54	XUT0973_350163_350216_54	XUT0973	7	TRUE	TRUE	FALSE	FALSE	FALSE	FALSE	FALSE	FALSE	FALSE
chr02	356398	356475	+	78	XUT0046_356398_356475_78	XUT0046	1	TRUE	TRUE	FALSE	FALSE	FALSE	FALSE	FALSE	FALSE	FALSE
chr02	356432	356482	+	51	XUT0046_356432_356482_51	XUT0046	2	TRUE	TRUE	FALSE	FALSE	FALSE	FALSE	FALSE	FALSE	FALSE
chr02	356555	356578	+	24	XUT0046_356555_356578_24	XUT0046	3	TRUE	TRUE	FALSE	FALSE	FALSE	FALSE	FALSE	FALSE	FALSE
chr02	362900	362938	+	39	XUT0047_362900_362938_39	XUT0047	1	TRUE	TRUE	TRUE	FALSE	TRUE	FALSE	TRUE	TRUE	TRUE
chr02	362942	362977	+	36	XUT0047_362942_362977_36	XUT0047	2	TRUE	TRUE	TRUE	FALSE	FALSE	FALSE	FALSE	FALSE	FALSE
chr02	363374	363391	+	18	XUT0047_363374_363391_18	XUT0047	7	TRUE	TRUE	FALSE	FALSE	FALSE	FALSE	FALSE	FALSE	FALSE
chr02	363680	363706	+	27	XUT0047_363680_363706_27	XUT0047	11	TRUE	TRUE	FALSE	FALSE	FALSE	FALSE	FALSE	FALSE	FALSE
chr02	363824	364063	+	240	XUT0047_363824_364063_240	XUT0047	13	TRUE	TRUE	TRUE	FALSE	FALSE	FALSE	TRUE	TRUE	FALSE
chr02	364211	364300	+	90	XUT0047_364211_364300_90	XUT0047	17	TRUE	TRUE	FALSE	FALSE	FALSE	FALSE	FALSE	FALSE	FALSE
chr02	364376	364399	+	24	XUT0047_364376_364399_24	XUT0047	19	TRUE	TRUE	FALSE	FALSE	FALSE	FALSE	FALSE	FALSE	FALSE
chr02	364487	364618	+	132	XUT0047_364487_364618_132	XUT0047	22	TRUE	TRUE	TRUE	FALSE	FALSE	FALSE	FALSE	FALSE	FALSE
chr02	363198	363227	+	30	XUT0047_363198_363227_30	XUT0047	4	TRUE	TRUE	FALSE	FALSE	FALSE	FALSE	FALSE	FALSE	FALSE
chr02	363609	363623	+	15	XUT0047_363609_363623_15	XUT0047	9	TRUE	TRUE	FALSE	FALSE	FALSE	FALSE	FALSE	FALSE	FALSE
chr02	364134	364160	+	27	XUT0047_364134_364160_27	XUT0047	16	TRUE	TRUE	FALSE	FALSE	FALSE	FALSE	FALSE	FALSE	FALSE
chr02	364296	364361	+	66	XUT0047_364296_364361_66	XUT0047	18	TRUE	TRUE	FALSE	FALSE	FALSE	TRUE	FALSE	TRUE	FALSE
chr02	364389	364568	+	180	XUT0047_364389_364568_180	XUT0047	20	TRUE	TRUE	FALSE	FALSE	FALSE	FALSE	FALSE	FALSE	FALSE
chr02	364584	364613	+	30	XUT0047_364584_364613_30	XUT0047	23	TRUE	TRUE	FALSE	FALSE	FALSE	FALSE	FALSE	FALSE	FALSE
chr02	364662	364697	+	36	XUT0047_364662_364697_36	XUT0047	25	TRUE	TRUE	FALSE	FALSE	FALSE	FALSE	FALSE	FALSE	FALSE
chr02	362959	363063	+	105	XUT0047_362959_363063_105	XUT0047	3	TRUE	TRUE	FALSE	FALSE	TRUE	TRUE	TRUE	TRUE	TRUE
chr02	363259	363285	+	27	XUT0047_363259_363285_27	XUT0047	5	TRUE	TRUE	FALSE	FALSE	FALSE	FALSE	FALSE	FALSE	FALSE
chr02	363304	363381	+	78	XUT0047_363304_363381_78	XUT0047	6	TRUE	TRUE	FALSE	FALSE	TRUE	TRUE	FALSE	TRUE	FALSE
chr02	363424	363516	+	93	XUT0047_363424_363516_93	XUT0047	8	TRUE	TRUE	FALSE	FALSE	FALSE	FALSE	FALSE	FALSE	FALSE
chr02	363634	363696	+	63	XUT0047_363634_363696_63	XUT0047	10	TRUE	TRUE	TRUE	FALSE	FALSE	FALSE	FALSE	FALSE	FALSE
chr02	363706	363771	+	66	XUT0047_363706_363771_66	XUT0047	12	TRUE	TRUE	FALSE	FALSE	FALSE	FALSE	FALSE	FALSE	FALSE
chr02	364093	364119	+	27	XUT0047_364093_364119_27	XUT0047	14	TRUE	TRUE	FALSE	FALSE	FALSE	FALSE	FALSE	FALSE	FALSE
chr02	364126	364254	+	129	XUT0047_364126_364254_129	XUT0047	15	TRUE	TRUE	TRUE	FALSE	FALSE	TRUE	FALSE	TRUE	FALSE
chr02	364411	364467	+	57	XUT0047_364411_364467_57	XUT0047	21	TRUE	TRUE	TRUE	FALSE	FALSE	FALSE	FALSE	FALSE	FALSE
chr02	364603	364623	+	21	XUT0047_364603_364623_21	XUT0047	24	TRUE	TRUE	FALSE	FALSE	FALSE	FALSE	FALSE	FALSE	FALSE
chr02	366068	366175	+	108	XUT0048_366068_366175_108	XUT0048	2	FALSE	TRUE	TRUE	FALSE	TRUE	FALSE	TRUE	TRUE	TRUE
chr02	366308	366421	+	114	XUT0048_366308_366421_114	XUT0048	5	FALSE	TRUE	FALSE	FALSE	FALSE	FALSE	FALSE	FALSE	FALSE
chr02	366123	366137	+	15	XUT0048_366123_366137_15	XUT0048	3	FALSE	TRUE	FALSE	FALSE	FALSE	FALSE	FALSE	FALSE	FALSE
chr02	366360	366401	+	42	XUT0048_366360_366401_42	XUT0048	6	FALSE	TRUE	FALSE	FALSE	FALSE	FALSE	FALSE	FALSE	FALSE
chr02	366034	366123	+	90	XUT0048_366034_366123_90	XUT0048	1	FALSE	TRUE	TRUE	FALSE	TRUE	TRUE	TRUE	TRUE	TRUE
chr02	366187	366396	+	210	XUT0048_366187_366396_210	XUT0048	4	FALSE	TRUE	FALSE	FALSE	FALSE	FALSE	FALSE	FALSE	FALSE
chr02	366511	366525	+	15	XUT0048_366511_366525_15	XUT0048	7	FALSE	TRUE	FALSE	FALSE	FALSE	FALSE	FALSE	FALSE	FALSE
chr02	370629	370685	+	57	XUT0049_370629_370685_57	XUT0049	1	FALSE	TRUE	TRUE	FALSE	FALSE	FALSE	TRUE	TRUE	FALSE
chr02	370692	370781	+	90	XUT0049_370692_370781_90	XUT0049	2	FALSE	TRUE	FALSE	FALSE	TRUE	FALSE	TRUE	TRUE	FALSE
chr02	370796	370813	+	18	XUT0049_370796_370813_18	XUT0049	3	FALSE	TRUE	FALSE	FALSE	FALSE	FALSE	FALSE	FALSE	FALSE
chr02	371450	371494	+	45	XUT0050_371450_371494_45	XUT0050	1	TRUE	TRUE	TRUE	FALSE	FALSE	FALSE	FALSE	FALSE	FALSE
chr02	371564	371659	+	96	XUT0050_371564_371659_96	XUT0050	3	TRUE	TRUE	TRUE	FALSE	TRUE	FALSE	TRUE	TRUE	FALSE
chr02	371723	371821	+	99	XUT0050_371723_371821_99	XUT0050	5	TRUE	TRUE	FALSE	FALSE	FALSE	FALSE	FALSE	FALSE	FALSE
chr02	372011	372031	+	21	XUT0050_372011_372031_21	XUT0050	7	TRUE	TRUE	FALSE	FALSE	FALSE	FALSE	FALSE	FALSE	FALSE
chr02	372629	372769	+	141	XUT0050_372629_372769_141	XUT0050	13	TRUE	TRUE	FALSE	FALSE	FALSE	FALSE	FALSE	FALSE	FALSE
chr02	372995	373171	+	177	XUT0050_372995_373171_177	XUT0050	17	TRUE	TRUE	FALSE	FALSE	FALSE	FALSE	FALSE	FALSE	FALSE
chr02	373667	373684	+	18	XUT0050_373667_373684_18	XUT0050	21	TRUE	TRUE	FALSE	FALSE	FALSE	FALSE	FALSE	FALSE	FALSE
chr02	373691	373708	+	18	XUT0050_373691_373708_18	XUT0050	23	TRUE	TRUE	FALSE	FALSE	FALSE	FALSE	FALSE	FALSE	FALSE
chr02	371478	371558	+	81	XUT0050_371478_371558_81	XUT0050	2	TRUE	TRUE	TRUE	FALSE	FALSE	FALSE	TRUE	TRUE	FALSE
chr02	371811	371849	+	39	XUT0050_371811_371849_39	XUT0050	6	TRUE	TRUE	FALSE	FALSE	FALSE	FALSE	FALSE	FALSE	FALSE
chr02	372255	372326	+	72	XUT0050_372255_372326_72	XUT0050	9	TRUE	TRUE	FALSE	FALSE	FALSE	FALSE	FALSE	FALSE	FALSE
chr02	372342	372461	+	120	XUT0050_372342_372461_120	XUT0050	10	TRUE	TRUE	FALSE	FALSE	FALSE	FALSE	FALSE	FALSE	FALSE
chr02	372567	372626	+	60	XUT0050_372567_372626_60	XUT0050	11	TRUE	TRUE	FALSE	FALSE	FALSE	FALSE	FALSE	FALSE	FALSE
chr02	372864	372878	+	15	XUT0050_372864_372878_15	XUT0050	14	TRUE	TRUE	FALSE	FALSE	FALSE	FALSE	FALSE	FALSE	FALSE
chr02	372882	373001	+	120	XUT0050_372882_373001_120	XUT0050	15	TRUE	TRUE	FALSE	FALSE	FALSE	FALSE	FALSE	FALSE	FALSE
chr02	373215	373244	+	30	XUT0050_373215_373244_30	XUT0050	18	TRUE	TRUE	FALSE	FALSE	FALSE	FALSE	FALSE	FALSE	FALSE
chr02	373671	373697	+	27	XUT0050_373671_373697_27	XUT0050	22	TRUE	TRUE	FALSE	FALSE	FALSE	FALSE	FALSE	FALSE	FALSE
chr02	371632	371670	+	39	XUT0050_371632_371670_39	XUT0050	4	TRUE	TRUE	FALSE	FALSE	FALSE	FALSE	FALSE	FALSE	FALSE
chr02	372061	372105	+	45	XUT0050_372061_372105_45	XUT0050	8	TRUE	TRUE	TRUE	FALSE	FALSE	FALSE	TRUE	TRUE	TRUE
chr02	372619	372705	+	87	XUT0050_372619_372705_87	XUT0050	12	TRUE	TRUE	FALSE	FALSE	FALSE	FALSE	FALSE	FALSE	FALSE
chr02	372889	372966	+	78	XUT0050_372889_372966_78	XUT0050	16	TRUE	TRUE	FALSE	FALSE	FALSE	FALSE	FALSE	FALSE	FALSE
chr02	373330	373356	+	27	XUT0050_373330_373356_27	XUT0050	19	TRUE	TRUE	FALSE	FALSE	FALSE	FALSE	FALSE	FALSE	FALSE
chr02	373366	373416	+	51	XUT0050_373366_373416_51	XUT0050	20	TRUE	TRUE	FALSE	FALSE	FALSE	FALSE	FALSE	FALSE	FALSE
chr02	376719	376790	+	72	XUT0051_376719_376790_72	XUT0051	5	TRUE	TRUE	TRUE	FALSE	FALSE	FALSE	TRUE	TRUE	FALSE
chr02	376815	376829	+	15	XUT0051_376815_376829_15	XUT0051	6	TRUE	TRUE	FALSE	FALSE	FALSE	FALSE	FALSE	FALSE	FALSE
chr02	376884	376949	+	66	XUT0051_376884_376949_66	XUT0051	8	TRUE	TRUE	FALSE	FALSE	FALSE	FALSE	FALSE	FALSE	FALSE
chr02	377004	377309	+	306	XUT0051_377004_377309_306	XUT0051	10	TRUE	TRUE	TRUE	FALSE	FALSE	FALSE	FALSE	FALSE	FALSE
chr02	377346	377447	+	102	XUT0051_377346_377447_102	XUT0051	12	TRUE	TRUE	FALSE	FALSE	FALSE	FALSE	FALSE	FALSE	FALSE
chr02	377640	377747	+	108	XUT0051_377640_377747_108	XUT0051	18	TRUE	TRUE	FALSE	FALSE	FALSE	FALSE	FALSE	FALSE	FALSE
chr02	377772	377885	+	114	XUT0051_377772_377885_114	XUT0051	19	TRUE	TRUE	FALSE	FALSE	FALSE	FALSE	FALSE	FALSE	FALSE
chr02	378021	378038	+	18	XUT0051_378021_378038_18	XUT0051	20	TRUE	TRUE	FALSE	FALSE	FALSE	FALSE	FALSE	FALSE	FALSE
chr02	378261	378491	+	231	XUT0051_378261_378491_231	XUT0051	22	TRUE	TRUE	FALSE	FALSE	TRUE	FALSE	TRUE	TRUE	FALSE
chr02	378573	378632	+	60	XUT0051_378573_378632_60	XUT0051	25	TRUE	TRUE	FALSE	FALSE	FALSE	FALSE	FALSE	FALSE	FALSE
chr02	376558	376599	+	42	XUT0051_376558_376599_42	XUT0051	2	TRUE	TRUE	TRUE	FALSE	FALSE	TRUE	FALSE	TRUE	FALSE
chr02	376705	376776	+	72	XUT0051_376705_376776_72	XUT0051	4	TRUE	TRUE	TRUE	FALSE	TRUE	FALSE	TRUE	TRUE	FALSE
chr02	376939	377013	+	75	XUT0051_376939_377013_75	XUT0051	9	TRUE	TRUE	FALSE	FALSE	FALSE	FALSE	FALSE	FALSE	FALSE
chr02	377227	377277	+	51	XUT0051_377227_377277_51	XUT0051	11	TRUE	TRUE	FALSE	FALSE	FALSE	FALSE	FALSE	FALSE	FALSE
chr02	377353	377382	+	30	XUT0051_377353_377382_30	XUT0051	13	TRUE	TRUE	FALSE	FALSE	FALSE	FALSE	FALSE	FALSE	FALSE
chr02	377410	377439	+	30	XUT0051_377410_377439_30	XUT0051	15	TRUE	TRUE	FALSE	FALSE	FALSE	FALSE	FALSE	FALSE	FALSE
chr02	377560	377592	+	33	XUT0051_377560_377592_33	XUT0051	16	TRUE	TRUE	FALSE	FALSE	FALSE	FALSE	FALSE	FALSE	FALSE
chr02	377608	377670	+	63	XUT0051_377608_377670_63	XUT0051	17	TRUE	TRUE	FALSE	FALSE	FALSE	FALSE	FALSE	FALSE	FALSE
chr02	378028	378126	+	99	XUT0051_378028_378126_99	XUT0051	21	TRUE	TRUE	FALSE	FALSE	FALSE	FALSE	FALSE	FALSE	FALSE
chr02	378532	378564	+	33	XUT0051_378532_378564_33	XUT0051	24	TRUE	TRUE	FALSE	FALSE	FALSE	FALSE	FALSE	FALSE	FALSE
chr02	376541	376558	+	18	XUT0051_376541_376558_18	XUT0051	1	TRUE	TRUE	FALSE	FALSE	FALSE	FALSE	FALSE	FALSE	FALSE
chr02	376562	376612	+	51	XUT0051_376562_376612_51	XUT0051	3	TRUE	TRUE	TRUE	FALSE	FALSE	TRUE	FALSE	TRUE	FALSE
chr02	376865	376924	+	60	XUT0051_376865_376924_60	XUT0051	7	TRUE	TRUE	FALSE	FALSE	FALSE	FALSE	FALSE	FALSE	FALSE
chr02	377363	377389	+	27	XUT0051_377363_377389_27	XUT0051	14	TRUE	TRUE	FALSE	FALSE	FALSE	FALSE	FALSE	FALSE	FALSE
chr02	378368	378466	+	99	XUT0051_378368_378466_99	XUT0051	23	TRUE	TRUE	TRUE	FALSE	FALSE	FALSE	FALSE	FALSE	FALSE
chr02	380671	380805	-	135	XUT0974_380671_380805_135	XUT0974	2	TRUE	TRUE	FALSE	FALSE	FALSE	FALSE	FALSE	FALSE	FALSE
chr02	380320	380475	-	156	XUT0974_380320_380475_156	XUT0974	7	TRUE	TRUE	FALSE	FALSE	FALSE	FALSE	FALSE	FALSE	FALSE
chr02	380970	381059	-	90	XUT0974_380970_381059_90	XUT0974	1	TRUE	TRUE	TRUE	FALSE	FALSE	TRUE	TRUE	TRUE	TRUE
chr02	380664	380735	-	72	XUT0974_380664_380735_72	XUT0974	3	TRUE	TRUE	FALSE	FALSE	FALSE	FALSE	FALSE	FALSE	FALSE
chr02	380592	380609	-	18	XUT0974_380592_380609_18	XUT0974	4	TRUE	TRUE	FALSE	FALSE	FALSE	FALSE	FALSE	FALSE	FALSE
chr02	380501	380527	-	27	XUT0974_380501_380527_27	XUT0974	5	TRUE	TRUE	FALSE	FALSE	FALSE	FALSE	FALSE	FALSE	FALSE
chr02	380417	380479	-	63	XUT0974_380417_380479_63	XUT0974	6	TRUE	TRUE	FALSE	FALSE	FALSE	FALSE	FALSE	FALSE	FALSE
chr02	392225	392365	+	141	XUT0052_392225_392365_141	XUT0052	2	FALSE	TRUE	FALSE	FALSE	FALSE	FALSE	FALSE	FALSE	FALSE
chr02	392115	392150	+	36	XUT0052_392115_392150_36	XUT0052	1	FALSE	TRUE	FALSE	FALSE	FALSE	FALSE	FALSE	FALSE	FALSE
chr02	407795	407815	+	21	XUT0053_407795_407815_21	XUT0053	7	FALSE	TRUE	FALSE	FALSE	FALSE	FALSE	FALSE	FALSE	FALSE
chr02	407822	407860	+	39	XUT0053_407822_407860_39	XUT0053	8	FALSE	TRUE	FALSE	FALSE	FALSE	FALSE	FALSE	FALSE	FALSE
chr02	407580	407654	+	75	XUT0053_407580_407654_75	XUT0053	2	FALSE	TRUE	FALSE	FALSE	FALSE	FALSE	FALSE	FALSE	FALSE
chr02	407679	407699	+	21	XUT0053_407679_407699_21	XUT0053	4	FALSE	TRUE	FALSE	FALSE	FALSE	FALSE	FALSE	FALSE	FALSE
chr02	407790	407906	+	117	XUT0053_407790_407906_117	XUT0053	6	FALSE	TRUE	FALSE	FALSE	FALSE	FALSE	FALSE	FALSE	FALSE
chr02	407548	407637	+	90	XUT0053_407548_407637_90	XUT0053	1	FALSE	TRUE	FALSE	FALSE	FALSE	FALSE	FALSE	FALSE	FALSE
chr02	407650	407679	+	30	XUT0053_407650_407679_30	XUT0053	3	FALSE	TRUE	FALSE	FALSE	FALSE	FALSE	FALSE	FALSE	FALSE
chr02	407710	407799	+	90	XUT0053_407710_407799_90	XUT0053	5	FALSE	TRUE	FALSE	FALSE	FALSE	FALSE	FALSE	FALSE	FALSE
chr02	407839	407883	+	45	XUT0053_407839_407883_45	XUT0053	9	FALSE	TRUE	FALSE	FALSE	FALSE	FALSE	FALSE	FALSE	FALSE
chr02	408707	408760	-	54	XUT0976_408707_408760_54	XUT0976	1	TRUE	TRUE	FALSE	FALSE	FALSE	FALSE	FALSE	FALSE	FALSE
chr02	408697	408732	-	36	XUT0976_408697_408732_36	XUT0976	2	TRUE	TRUE	FALSE	FALSE	FALSE	FALSE	FALSE	FALSE	FALSE
chr02	417154	417255	-	102	XUT0977_417154_417255_102	XUT0977	2	TRUE	TRUE	FALSE	FALSE	FALSE	FALSE	FALSE	FALSE	FALSE
chr02	417132	417167	-	36	XUT0977_417132_417167_36	XUT0977	3	TRUE	TRUE	FALSE	FALSE	FALSE	FALSE	FALSE	FALSE	FALSE
chr02	417227	417271	-	45	XUT0977_417227_417271_45	XUT0977	1	TRUE	TRUE	FALSE	FALSE	FALSE	FALSE	FALSE	FALSE	FALSE
chr02	418554	418592	+	39	XUT0054_418554_418592_39	XUT0054	2	FALSE	TRUE	FALSE	FALSE	FALSE	FALSE	FALSE	FALSE	FALSE
chr02	418522	418554	+	33	XUT0054_418522_418554_33	XUT0054	1	FALSE	TRUE	TRUE	FALSE	FALSE	FALSE	FALSE	FALSE	FALSE
chr02	419923	419982	+	60	XUT0055_419923_419982_60	XUT0055	1	FALSE	TRUE	FALSE	FALSE	FALSE	FALSE	FALSE	FALSE	FALSE
chr02	420058	420081	+	24	XUT0055_420058_420081_24	XUT0055	3	FALSE	TRUE	FALSE	FALSE	FALSE	FALSE	FALSE	FALSE	FALSE
chr02	419975	420028	+	54	XUT0055_419975_420028_54	XUT0055	2	FALSE	TRUE	FALSE	FALSE	FALSE	FALSE	FALSE	FALSE	FALSE
chr02	427255	427269	+	15	XUT0056_427255_427269_15	XUT0056	1	TRUE	TRUE	FALSE	FALSE	FALSE	FALSE	FALSE	FALSE	FALSE
chr02	427297	427578	+	282	XUT0056_427297_427578_282	XUT0056	3	TRUE	TRUE	TRUE	FALSE	FALSE	FALSE	FALSE	FALSE	FALSE
chr02	427272	427319	+	48	XUT0056_427272_427319_48	XUT0056	2	TRUE	TRUE	FALSE	FALSE	FALSE	FALSE	FALSE	FALSE	FALSE
chr02	427344	427427	+	84	XUT0056_427344_427427_84	XUT0056	4	TRUE	TRUE	FALSE	FALSE	FALSE	FALSE	FALSE	FALSE	FALSE
chr02	427992	428030	+	39	XUT0057_427992_428030_39	XUT0057	2	TRUE	TRUE	FALSE	FALSE	FALSE	FALSE	FALSE	FALSE	FALSE
chr02	428571	428642	+	72	XUT0057_428571_428642_72	XUT0057	8	TRUE	TRUE	FALSE	FALSE	FALSE	FALSE	FALSE	FALSE	FALSE
chr02	428658	428705	+	48	XUT0057_428658_428705_48	XUT0057	9	TRUE	TRUE	FALSE	FALSE	FALSE	FALSE	FALSE	FALSE	FALSE
chr02	428877	429026	+	150	XUT0057_428877_429026_150	XUT0057	13	TRUE	TRUE	FALSE	FALSE	FALSE	FALSE	FALSE	FALSE	FALSE
chr02	429114	429131	+	18	XUT0057_429114_429131_18	XUT0057	15	TRUE	TRUE	FALSE	FALSE	FALSE	FALSE	FALSE	FALSE	FALSE
chr02	429339	429365	+	27	XUT0057_429339_429365_27	XUT0057	18	TRUE	TRUE	FALSE	FALSE	FALSE	FALSE	FALSE	FALSE	FALSE
chr02	429759	429773	+	15	XUT0057_429759_429773_15	XUT0057	20	TRUE	TRUE	FALSE	FALSE	FALSE	FALSE	FALSE	FALSE	FALSE
chr02	429858	429971	+	114	XUT0057_429858_429971_114	XUT0057	21	TRUE	TRUE	FALSE	FALSE	FALSE	FALSE	FALSE	FALSE	FALSE
chr02	430275	430292	+	18	XUT0057_430275_430292_18	XUT0057	25	TRUE	TRUE	FALSE	FALSE	FALSE	FALSE	FALSE	FALSE	FALSE
chr02	430374	430409	+	36	XUT0057_430374_430409_36	XUT0057	27	TRUE	TRUE	FALSE	FALSE	FALSE	FALSE	FALSE	FALSE	FALSE
chr02	430893	430931	+	39	XUT0057_430893_430931_39	XUT0057	33	TRUE	TRUE	FALSE	FALSE	FALSE	FALSE	FALSE	FALSE	FALSE
chr02	431076	431120	+	45	XUT0057_431076_431120_45	XUT0057	35	TRUE	TRUE	FALSE	FALSE	FALSE	FALSE	FALSE	FALSE	FALSE
chr02	431142	431192	+	51	XUT0057_431142_431192_51	XUT0057	37	TRUE	TRUE	FALSE	FALSE	FALSE	FALSE	FALSE	FALSE	FALSE
chr02	431301	431405	+	105	XUT0057_431301_431405_105	XUT0057	38	TRUE	TRUE	FALSE	FALSE	FALSE	FALSE	FALSE	FALSE	FALSE
chr02	431499	431519	+	21	XUT0057_431499_431519_21	XUT0057	40	TRUE	TRUE	FALSE	FALSE	FALSE	FALSE	FALSE	FALSE	FALSE
chr02	427909	427923	+	15	XUT0057_427909_427923_15	XUT0057	1	TRUE	TRUE	FALSE	FALSE	FALSE	FALSE	FALSE	FALSE	FALSE
chr02	428008	428070	+	63	XUT0057_428008_428070_63	XUT0057	3	TRUE	TRUE	FALSE	FALSE	FALSE	FALSE	FALSE	FALSE	FALSE
chr02	428389	428559	+	171	XUT0057_428389_428559_171	XUT0057	7	TRUE	TRUE	FALSE	FALSE	FALSE	FALSE	FALSE	FALSE	FALSE
chr02	428836	428856	+	21	XUT0057_428836_428856_21	XUT0057	12	TRUE	TRUE	FALSE	FALSE	FALSE	FALSE	FALSE	FALSE	FALSE
chr02	429145	429159	+	15	XUT0057_429145_429159_15	XUT0057	16	TRUE	TRUE	FALSE	FALSE	FALSE	FALSE	FALSE	FALSE	FALSE
chr02	429862	429945	+	84	XUT0057_429862_429945_84	XUT0057	22	TRUE	TRUE	FALSE	FALSE	FALSE	FALSE	FALSE	FALSE	FALSE
chr02	430159	430182	+	24	XUT0057_430159_430182_24	XUT0057	24	TRUE	TRUE	FALSE	FALSE	FALSE	FALSE	FALSE	FALSE	FALSE
chr02	430309	430356	+	48	XUT0057_430309_430356_48	XUT0057	26	TRUE	TRUE	FALSE	FALSE	FALSE	FALSE	FALSE	FALSE	FALSE
chr02	430537	430602	+	66	XUT0057_430537_430602_66	XUT0057	29	TRUE	TRUE	FALSE	FALSE	FALSE	FALSE	FALSE	FALSE	FALSE
chr02	430630	430644	+	15	XUT0057_430630_430644_15	XUT0057	30	TRUE	TRUE	FALSE	FALSE	FALSE	FALSE	FALSE	FALSE	FALSE
chr02	430813	430944	+	132	XUT0057_430813_430944_132	XUT0057	32	TRUE	TRUE	TRUE	FALSE	FALSE	FALSE	FALSE	FALSE	FALSE
chr02	430999	431028	+	30	XUT0057_430999_431028_30	XUT0057	34	TRUE	TRUE	FALSE	FALSE	FALSE	FALSE	FALSE	FALSE	FALSE
chr02	431095	431115	+	21	XUT0057_431095_431115_21	XUT0057	36	TRUE	TRUE	FALSE	FALSE	FALSE	FALSE	FALSE	FALSE	FALSE
chr02	428012	428095	+	84	XUT0057_428012_428095_84	XUT0057	4	TRUE	TRUE	FALSE	FALSE	FALSE	FALSE	FALSE	FALSE	FALSE
chr02	428237	428263	+	27	XUT0057_428237_428263_27	XUT0057	5	TRUE	TRUE	FALSE	FALSE	FALSE	FALSE	FALSE	FALSE	FALSE
chr02	428309	428434	+	126	XUT0057_428309_428434_126	XUT0057	6	TRUE	TRUE	FALSE	FALSE	FALSE	FALSE	FALSE	FALSE	FALSE
chr02	428687	428752	+	66	XUT0057_428687_428752_66	XUT0057	10	TRUE	TRUE	FALSE	FALSE	FALSE	FALSE	FALSE	FALSE	FALSE
chr02	428780	428794	+	15	XUT0057_428780_428794_15	XUT0057	11	TRUE	TRUE	FALSE	FALSE	FALSE	FALSE	FALSE	FALSE	FALSE
chr02	428963	429055	+	93	XUT0057_428963_429055_93	XUT0057	14	TRUE	TRUE	FALSE	FALSE	FALSE	FALSE	FALSE	FALSE	FALSE
chr02	429197	429352	+	156	XUT0057_429197_429352_156	XUT0057	17	TRUE	TRUE	FALSE	FALSE	FALSE	FALSE	FALSE	FALSE	FALSE
chr02	429575	429646	+	72	XUT0057_429575_429646_72	XUT0057	19	TRUE	TRUE	FALSE	FALSE	FALSE	FALSE	FALSE	FALSE	FALSE
chr02	430058	430099	+	42	XUT0057_430058_430099_42	XUT0057	23	TRUE	TRUE	FALSE	FALSE	FALSE	FALSE	FALSE	FALSE	FALSE
chr02	430421	430630	+	210	XUT0057_430421_430630_210	XUT0057	28	TRUE	TRUE	FALSE	FALSE	FALSE	FALSE	FALSE	FALSE	FALSE
chr02	430727	430876	+	150	XUT0057_430727_430876_150	XUT0057	31	TRUE	TRUE	TRUE	FALSE	FALSE	FALSE	FALSE	FALSE	FALSE
chr02	431435	431473	+	39	XUT0057_431435_431473_39	XUT0057	39	TRUE	TRUE	FALSE	FALSE	FALSE	FALSE	FALSE	FALSE	FALSE
chr02	466339	466356	+	18	XUT0058_466339_466356_18	XUT0058	1	TRUE	FALSE	FALSE	FALSE	FALSE	FALSE	FALSE	FALSE	FALSE
chr02	466405	466419	+	15	XUT0058_466405_466419_15	XUT0058	3	TRUE	FALSE	FALSE	FALSE	FALSE	FALSE	FALSE	FALSE	FALSE
chr02	466344	466373	+	30	XUT0058_466344_466373_30	XUT0058	2	TRUE	FALSE	FALSE	FALSE	FALSE	FALSE	FALSE	FALSE	FALSE
chr02	472735	472797	+	63	XUT0059_472735_472797_63	XUT0059	6	FALSE	TRUE	FALSE	FALSE	FALSE	FALSE	FALSE	FALSE	FALSE
chr02	473311	473343	+	33	XUT0059_473311_473343_33	XUT0059	13	FALSE	TRUE	FALSE	FALSE	FALSE	FALSE	FALSE	FALSE	FALSE
chr02	473644	473664	+	21	XUT0059_473644_473664_21	XUT0059	17	FALSE	TRUE	FALSE	FALSE	FALSE	FALSE	FALSE	FALSE	FALSE
chr02	473734	473769	+	36	XUT0059_473734_473769_36	XUT0059	18	FALSE	TRUE	FALSE	FALSE	FALSE	FALSE	FALSE	FALSE	FALSE
chr02	472400	472438	+	39	XUT0059_472400_472438_39	XUT0059	3	FALSE	TRUE	FALSE	FALSE	FALSE	FALSE	FALSE	FALSE	FALSE
chr02	472532	472573	+	42	XUT0059_472532_472573_42	XUT0059	4	FALSE	TRUE	FALSE	FALSE	FALSE	FALSE	FALSE	FALSE	FALSE
chr02	472622	472672	+	51	XUT0059_472622_472672_51	XUT0059	5	FALSE	TRUE	FALSE	FALSE	FALSE	FALSE	FALSE	FALSE	FALSE
chr02	473075	473140	+	66	XUT0059_473075_473140_66	XUT0059	10	FALSE	TRUE	FALSE	FALSE	FALSE	FALSE	FALSE	FALSE	FALSE
chr02	473414	473455	+	42	XUT0059_473414_473455_42	XUT0059	15	FALSE	TRUE	FALSE	FALSE	FALSE	FALSE	FALSE	FALSE	FALSE
chr02	473459	473476	+	18	XUT0059_473459_473476_18	XUT0059	16	FALSE	TRUE	FALSE	FALSE	FALSE	FALSE	FALSE	FALSE	FALSE
chr02	473783	473803	+	21	XUT0059_473783_473803_21	XUT0059	19	FALSE	TRUE	FALSE	FALSE	FALSE	FALSE	FALSE	FALSE	FALSE
chr02	472314	472334	+	21	XUT0059_472314_472334_21	XUT0059	1	FALSE	TRUE	FALSE	FALSE	FALSE	FALSE	FALSE	FALSE	FALSE
chr02	472386	472466	+	81	XUT0059_472386_472466_81	XUT0059	2	FALSE	TRUE	FALSE	FALSE	FALSE	FALSE	FALSE	FALSE	FALSE
chr02	472779	472793	+	15	XUT0059_472779_472793_15	XUT0059	7	FALSE	TRUE	FALSE	FALSE	FALSE	FALSE	FALSE	FALSE	FALSE
chr02	472803	472844	+	42	XUT0059_472803_472844_42	XUT0059	8	FALSE	TRUE	FALSE	FALSE	FALSE	FALSE	FALSE	FALSE	FALSE
chr02	472923	473027	+	105	XUT0059_472923_473027_105	XUT0059	9	FALSE	TRUE	FALSE	FALSE	FALSE	FALSE	FALSE	FALSE	FALSE
chr02	473085	473111	+	27	XUT0059_473085_473111_27	XUT0059	11	FALSE	TRUE	FALSE	FALSE	FALSE	FALSE	FALSE	FALSE	FALSE
chr02	473301	473339	+	39	XUT0059_473301_473339_39	XUT0059	12	FALSE	TRUE	FALSE	FALSE	FALSE	FALSE	FALSE	FALSE	FALSE
chr02	473361	473396	+	36	XUT0059_473361_473396_36	XUT0059	14	FALSE	TRUE	FALSE	FALSE	FALSE	FALSE	FALSE	FALSE	FALSE
chr02	474081	474113	+	33	XUT0059_474081_474113_33	XUT0059	20	FALSE	TRUE	FALSE	FALSE	FALSE	FALSE	FALSE	FALSE	FALSE
chr02	474597	474659	+	63	XUT0060_474597_474659_63	XUT0060	2	TRUE	TRUE	TRUE	FALSE	FALSE	FALSE	FALSE	FALSE	FALSE
chr02	474735	474797	+	63	XUT0060_474735_474797_63	XUT0060	3	TRUE	TRUE	FALSE	FALSE	FALSE	FALSE	FALSE	FALSE	FALSE
chr02	474951	474971	+	21	XUT0060_474951_474971_21	XUT0060	7	TRUE	TRUE	FALSE	FALSE	FALSE	FALSE	FALSE	FALSE	FALSE
chr02	475047	475094	+	48	XUT0060_475047_475094_48	XUT0060	8	TRUE	TRUE	FALSE	FALSE	FALSE	FALSE	FALSE	FALSE	FALSE
chr02	475167	475217	+	51	XUT0060_475167_475217_51	XUT0060	9	TRUE	TRUE	FALSE	FALSE	FALSE	FALSE	FALSE	FALSE	FALSE
chr02	475236	475520	+	285	XUT0060_475236_475520_285	XUT0060	10	TRUE	TRUE	FALSE	FALSE	FALSE	FALSE	FALSE	FALSE	FALSE
chr02	475710	475886	+	177	XUT0060_475710_475886_177	XUT0060	15	TRUE	TRUE	FALSE	FALSE	FALSE	FALSE	FALSE	FALSE	FALSE
chr02	476001	476021	+	21	XUT0060_476001_476021_21	XUT0060	18	TRUE	TRUE	FALSE	FALSE	FALSE	FALSE	FALSE	FALSE	FALSE
chr02	476418	476453	+	36	XUT0060_476418_476453_36	XUT0060	22	TRUE	TRUE	FALSE	FALSE	FALSE	FALSE	FALSE	FALSE	FALSE
chr02	476616	476708	+	93	XUT0060_476616_476708_93	XUT0060	23	TRUE	TRUE	FALSE	FALSE	FALSE	FALSE	FALSE	FALSE	FALSE
chr02	474874	474891	+	18	XUT0060_474874_474891_18	XUT0060	5	TRUE	TRUE	FALSE	FALSE	FALSE	FALSE	FALSE	FALSE	FALSE
chr02	475354	475389	+	36	XUT0060_475354_475389_36	XUT0060	11	TRUE	TRUE	FALSE	FALSE	FALSE	FALSE	FALSE	FALSE	FALSE
chr02	475579	475620	+	42	XUT0060_475579_475620_42	XUT0060	13	TRUE	TRUE	FALSE	FALSE	FALSE	FALSE	FALSE	FALSE	FALSE
chr02	475810	475893	+	84	XUT0060_475810_475893_84	XUT0060	16	TRUE	TRUE	FALSE	FALSE	FALSE	FALSE	FALSE	FALSE	FALSE
chr02	475990	476097	+	108	XUT0060_475990_476097_108	XUT0060	17	TRUE	TRUE	FALSE	FALSE	FALSE	FALSE	FALSE	FALSE	FALSE
chr02	476227	476262	+	36	XUT0060_476227_476262_36	XUT0060	20	TRUE	TRUE	FALSE	FALSE	FALSE	FALSE	FALSE	FALSE	FALSE
chr02	476737	476763	+	27	XUT0060_476737_476763_27	XUT0060	25	TRUE	TRUE	FALSE	FALSE	FALSE	FALSE	FALSE	FALSE	FALSE
chr02	476791	476859	+	69	XUT0060_476791_476859_69	XUT0060	26	TRUE	TRUE	FALSE	FALSE	FALSE	FALSE	FALSE	FALSE	FALSE
chr02	474551	474571	+	21	XUT0060_474551_474571_21	XUT0060	1	TRUE	TRUE	FALSE	FALSE	FALSE	FALSE	FALSE	FALSE	FALSE
chr02	474788	474856	+	69	XUT0060_474788_474856_69	XUT0060	4	TRUE	TRUE	TRUE	FALSE	FALSE	FALSE	FALSE	FALSE	FALSE
chr02	474947	475072	+	126	XUT0060_474947_475072_126	XUT0060	6	TRUE	TRUE	TRUE	FALSE	FALSE	FALSE	FALSE	FALSE	FALSE
chr02	475403	475423	+	21	XUT0060_475403_475423_21	XUT0060	12	TRUE	TRUE	FALSE	FALSE	FALSE	FALSE	FALSE	FALSE	FALSE
chr02	475649	475672	+	24	XUT0060_475649_475672_24	XUT0060	14	TRUE	TRUE	FALSE	FALSE	FALSE	FALSE	FALSE	FALSE	FALSE
chr02	476129	476143	+	15	XUT0060_476129_476143_15	XUT0060	19	TRUE	TRUE	FALSE	FALSE	FALSE	FALSE	FALSE	FALSE	FALSE
chr02	476270	476332	+	63	XUT0060_476270_476332_63	XUT0060	21	TRUE	TRUE	FALSE	FALSE	FALSE	FALSE	FALSE	FALSE	FALSE
chr02	476708	476737	+	30	XUT0060_476708_476737_30	XUT0060	24	TRUE	TRUE	FALSE	FALSE	FALSE	FALSE	FALSE	FALSE	FALSE
chr02	483852	483926	+	75	XUT0061_483852_483926_75	XUT0061	2	FALSE	TRUE	FALSE	FALSE	FALSE	FALSE	FALSE	FALSE	FALSE
chr02	483844	483942	+	99	XUT0061_483844_483942_99	XUT0061	1	FALSE	TRUE	FALSE	FALSE	FALSE	FALSE	FALSE	FALSE	FALSE
chr02	490754	490891	-	138	XUT0978_490754_490891_138	XUT0978	1	FALSE	TRUE	FALSE	FALSE	FALSE	FALSE	FALSE	FALSE	FALSE
chr02	493105	493215	+	111	XUT0062_493105_493215_111	XUT0062	1	FALSE	TRUE	TRUE	FALSE	FALSE	FALSE	FALSE	FALSE	FALSE
chr02	493336	493350	+	15	XUT0062_493336_493350_15	XUT0062	5	FALSE	TRUE	FALSE	FALSE	FALSE	FALSE	FALSE	FALSE	FALSE
chr02	493172	493261	+	90	XUT0062_493172_493261_90	XUT0062	2	FALSE	TRUE	FALSE	FALSE	FALSE	FALSE	FALSE	FALSE	FALSE
chr02	493310	493444	+	135	XUT0062_493310_493444_135	XUT0062	4	FALSE	TRUE	FALSE	FALSE	FALSE	FALSE	FALSE	FALSE	FALSE
chr02	493466	493564	+	99	XUT0062_493466_493564_99	XUT0062	6	FALSE	TRUE	FALSE	FALSE	FALSE	FALSE	FALSE	FALSE	FALSE
chr02	493299	493361	+	63	XUT0062_493299_493361_63	XUT0062	3	FALSE	TRUE	FALSE	FALSE	FALSE	FALSE	FALSE	FALSE	FALSE
chr02	495637	495675	+	39	XUT0063_495637_495675_39	XUT0063	1	TRUE	TRUE	FALSE	FALSE	FALSE	FALSE	FALSE	FALSE	FALSE
chr02	495709	495753	+	45	XUT0063_495709_495753_45	XUT0063	3	TRUE	TRUE	FALSE	FALSE	FALSE	FALSE	FALSE	FALSE	FALSE
chr02	495690	495767	+	78	XUT0063_495690_495767_78	XUT0063	2	TRUE	TRUE	FALSE	FALSE	FALSE	FALSE	FALSE	FALSE	FALSE
chr02	495789	495803	+	15	XUT0063_495789_495803_15	XUT0063	4	TRUE	TRUE	FALSE	FALSE	FALSE	FALSE	FALSE	FALSE	FALSE
chr02	495813	495911	+	99	XUT0063_495813_495911_99	XUT0063	5	TRUE	TRUE	FALSE	FALSE	FALSE	FALSE	FALSE	FALSE	FALSE
chr02	499557	499589	+	33	XUT0064_499557_499589_33	XUT0064	1	FALSE	FALSE	FALSE	FALSE	FALSE	FALSE	FALSE	FALSE	FALSE
chr02	499654	499725	+	72	XUT0064_499654_499725_72	XUT0064	2	FALSE	FALSE	FALSE	FALSE	FALSE	FALSE	FALSE	FALSE	FALSE
chr02	499700	499717	+	18	XUT0064_499700_499717_18	XUT0064	3	FALSE	FALSE	FALSE	FALSE	FALSE	FALSE	FALSE	FALSE	FALSE
chr02	506481	506507	-	27	XUT0980_506481_506507_27	XUT0980	1	TRUE	TRUE	FALSE	FALSE	FALSE	FALSE	FALSE	FALSE	FALSE
chr02	514267	514290	+	24	XUT0065_514267_514290_24	XUT0065	1	TRUE	TRUE	FALSE	FALSE	FALSE	FALSE	FALSE	FALSE	FALSE
chr02	514375	514569	+	195	XUT0065_514375_514569_195	XUT0065	2	TRUE	TRUE	FALSE	FALSE	FALSE	FALSE	FALSE	FALSE	FALSE
chr02	514544	514612	+	69	XUT0065_514544_514612_69	XUT0065	4	TRUE	TRUE	FALSE	FALSE	FALSE	FALSE	FALSE	FALSE	FALSE
chr02	514868	514891	+	24	XUT0065_514868_514891_24	XUT0065	7	TRUE	TRUE	FALSE	FALSE	FALSE	FALSE	FALSE	FALSE	FALSE
chr02	515042	515101	+	60	XUT0065_515042_515101_60	XUT0065	8	TRUE	TRUE	FALSE	FALSE	FALSE	FALSE	FALSE	FALSE	FALSE
chr02	514476	514490	+	15	XUT0065_514476_514490_15	XUT0065	3	TRUE	TRUE	FALSE	FALSE	FALSE	FALSE	FALSE	FALSE	FALSE
chr02	514569	514589	+	21	XUT0065_514569_514589_21	XUT0065	5	TRUE	TRUE	FALSE	FALSE	FALSE	FALSE	FALSE	FALSE	FALSE
chr02	514770	514910	+	141	XUT0065_514770_514910_141	XUT0065	6	TRUE	TRUE	FALSE	FALSE	FALSE	FALSE	FALSE	FALSE	FALSE
chr02	532582	532626	+	45	XUT0066_532582_532626_45	XUT0066	2	TRUE	TRUE	TRUE	FALSE	FALSE	FALSE	FALSE	FALSE	FALSE
chr02	532759	532773	+	15	XUT0066_532759_532773_15	XUT0066	4	TRUE	TRUE	FALSE	FALSE	FALSE	FALSE	FALSE	FALSE	FALSE
chr02	532999	533097	+	99	XUT0066_532999_533097_99	XUT0066	7	TRUE	TRUE	FALSE	FALSE	FALSE	FALSE	FALSE	FALSE	FALSE
chr02	533212	533235	+	24	XUT0066_533212_533235_24	XUT0066	9	TRUE	TRUE	FALSE	FALSE	FALSE	FALSE	FALSE	FALSE	FALSE
chr02	533242	533295	+	54	XUT0066_533242_533295_54	XUT0066	10	TRUE	TRUE	FALSE	FALSE	FALSE	FALSE	FALSE	FALSE	FALSE
chr02	532505	532534	+	30	XUT0066_532505_532534_30	XUT0066	1	TRUE	TRUE	TRUE	FALSE	FALSE	FALSE	TRUE	TRUE	TRUE
chr02	532742	532759	+	18	XUT0066_532742_532759_18	XUT0066	3	TRUE	TRUE	FALSE	FALSE	FALSE	FALSE	FALSE	FALSE	FALSE
chr02	532811	532837	+	27	XUT0066_532811_532837_27	XUT0066	5	TRUE	TRUE	FALSE	FALSE	FALSE	FALSE	FALSE	FALSE	FALSE
chr02	532934	532999	+	66	XUT0066_532934_532999_66	XUT0066	6	TRUE	TRUE	FALSE	FALSE	FALSE	FALSE	FALSE	FALSE	FALSE
chr02	533208	533225	+	18	XUT0066_533208_533225_18	XUT0066	8	TRUE	TRUE	FALSE	FALSE	FALSE	FALSE	FALSE	FALSE	FALSE
chr02	533886	533957	-	72	XUT0981_533886_533957_72	XUT0981	7	TRUE	TRUE	FALSE	FALSE	FALSE	FALSE	FALSE	FALSE	FALSE
chr02	534896	534976	-	81	XUT0981_534896_534976_81	XUT0981	1	TRUE	TRUE	TRUE	FALSE	FALSE	FALSE	TRUE	TRUE	TRUE
chr02	534413	534592	-	180	XUT0981_534413_534592_180	XUT0981	3	TRUE	TRUE	FALSE	FALSE	FALSE	FALSE	FALSE	FALSE	FALSE
chr02	533960	534187	-	228	XUT0981_533960_534187_228	XUT0981	5	TRUE	TRUE	TRUE	FALSE	TRUE	FALSE	FALSE	TRUE	FALSE
chr02	533876	533905	-	30	XUT0981_533876_533905_30	XUT0981	8	TRUE	TRUE	FALSE	FALSE	FALSE	FALSE	FALSE	FALSE	FALSE
chr02	534622	534642	-	21	XUT0981_534622_534642_21	XUT0981	2	TRUE	TRUE	FALSE	FALSE	FALSE	FALSE	FALSE	FALSE	FALSE
chr02	534358	534453	-	96	XUT0981_534358_534453_96	XUT0981	4	TRUE	TRUE	FALSE	FALSE	FALSE	FALSE	FALSE	FALSE	FALSE
chr02	533971	534066	-	96	XUT0981_533971_534066_96	XUT0981	6	TRUE	TRUE	FALSE	FALSE	FALSE	FALSE	FALSE	FALSE	FALSE
chr02	540858	540884	-	27	XUT0982_540858_540884_27	XUT0982	2	TRUE	TRUE	TRUE	FALSE	FALSE	FALSE	FALSE	FALSE	FALSE
chr02	540681	540713	-	33	XUT0982_540681_540713_33	XUT0982	3	TRUE	TRUE	FALSE	FALSE	FALSE	FALSE	FALSE	FALSE	FALSE
chr02	540276	540323	-	48	XUT0982_540276_540323_48	XUT0982	8	TRUE	TRUE	FALSE	FALSE	FALSE	FALSE	FALSE	FALSE	FALSE
chr02	540162	540212	-	51	XUT0982_540162_540212_51	XUT0982	10	TRUE	TRUE	FALSE	FALSE	FALSE	FALSE	FALSE	FALSE	FALSE
chr02	540491	540538	-	48	XUT0982_540491_540538_48	XUT0982	6	TRUE	TRUE	FALSE	FALSE	FALSE	FALSE	FALSE	FALSE	FALSE
chr02	540347	540379	-	33	XUT0982_540347_540379_33	XUT0982	7	TRUE	TRUE	FALSE	FALSE	FALSE	FALSE	FALSE	FALSE	FALSE
chr02	540008	540037	-	30	XUT0982_540008_540037_30	XUT0982	12	TRUE	TRUE	FALSE	FALSE	FALSE	FALSE	FALSE	FALSE	FALSE
chr02	540808	540969	-	162	XUT0982_540808_540969_162	XUT0982	1	TRUE	TRUE	TRUE	FALSE	TRUE	TRUE	TRUE	TRUE	TRUE
chr02	540646	540690	-	45	XUT0982_540646_540690_45	XUT0982	4	TRUE	TRUE	FALSE	FALSE	FALSE	FALSE	FALSE	FALSE	FALSE
chr02	540538	540594	-	57	XUT0982_540538_540594_57	XUT0982	5	TRUE	TRUE	FALSE	FALSE	FALSE	FALSE	FALSE	FALSE	FALSE
chr02	540199	540276	-	78	XUT0982_540199_540276_78	XUT0982	9	TRUE	TRUE	FALSE	FALSE	FALSE	FALSE	FALSE	FALSE	FALSE
chr02	540118	540180	-	63	XUT0982_540118_540180_63	XUT0982	11	TRUE	TRUE	FALSE	FALSE	FALSE	FALSE	FALSE	FALSE	FALSE
chr02	539974	540018	-	45	XUT0982_539974_540018_45	XUT0982	13	TRUE	TRUE	FALSE	FALSE	FALSE	FALSE	FALSE	FALSE	FALSE
chr02	546040	546159	-	120	XUT0983_546040_546159_120	XUT0983	1	FALSE	TRUE	FALSE	FALSE	TRUE	FALSE	FALSE	TRUE	TRUE
chr02	549311	549397	-	87	XUT0984_549311_549397_87	XUT0984	1	FALSE	FALSE	FALSE	FALSE	TRUE	FALSE	TRUE	TRUE	FALSE
chr02	593580	593603	+	24	XUT0067_593580_593603_24	XUT0067	1	TRUE	TRUE	FALSE	FALSE	FALSE	FALSE	FALSE	FALSE	FALSE
chr02	593637	593705	+	69	XUT0067_593637_593705_69	XUT0067	2	TRUE	TRUE	FALSE	FALSE	FALSE	FALSE	FALSE	FALSE	FALSE
chr02	594090	594170	+	81	XUT0068_594090_594170_81	XUT0068	1	TRUE	TRUE	FALSE	FALSE	FALSE	FALSE	FALSE	FALSE	FALSE
chr02	594163	594192	+	30	XUT0068_594163_594192_30	XUT0068	2	TRUE	TRUE	FALSE	FALSE	FALSE	FALSE	FALSE	FALSE	FALSE
chr02	594199	594315	+	117	XUT0068_594199_594315_117	XUT0068	3	TRUE	TRUE	FALSE	FALSE	FALSE	FALSE	FALSE	FALSE	FALSE
chr02	601944	601994	-	51	XUT0986_601944_601994_51	XUT0986	3	TRUE	TRUE	FALSE	FALSE	FALSE	FALSE	FALSE	FALSE	FALSE
chr02	601596	601688	-	93	XUT0986_601596_601688_93	XUT0986	7	TRUE	TRUE	TRUE	FALSE	FALSE	FALSE	FALSE	FALSE	FALSE
chr02	601443	601583	-	141	XUT0986_601443_601583_141	XUT0986	8	TRUE	TRUE	FALSE	FALSE	FALSE	FALSE	FALSE	FALSE	FALSE
chr02	602180	602197	-	18	XUT0986_602180_602197_18	XUT0986	1	TRUE	TRUE	FALSE	FALSE	FALSE	FALSE	FALSE	FALSE	FALSE
chr02	602096	602161	-	66	XUT0986_602096_602161_66	XUT0986	2	TRUE	TRUE	FALSE	FALSE	FALSE	FALSE	FALSE	FALSE	FALSE
chr02	601889	601903	-	15	XUT0986_601889_601903_15	XUT0986	4	TRUE	TRUE	FALSE	FALSE	FALSE	FALSE	FALSE	FALSE	FALSE
chr02	601835	601876	-	42	XUT0986_601835_601876_42	XUT0986	5	TRUE	TRUE	FALSE	FALSE	FALSE	FALSE	FALSE	FALSE	FALSE
chr02	601831	601863	-	33	XUT0986_601831_601863_33	XUT0986	6	TRUE	TRUE	FALSE	FALSE	FALSE	FALSE	FALSE	FALSE	FALSE
chr02	611600	611635	+	36	XUT0069_611600_611635_36	XUT0069	2	TRUE	TRUE	FALSE	FALSE	FALSE	FALSE	FALSE	FALSE	FALSE
chr02	611678	611791	+	114	XUT0069_611678_611791_114	XUT0069	5	TRUE	TRUE	TRUE	FALSE	TRUE	FALSE	TRUE	TRUE	TRUE
chr02	611613	611678	+	66	XUT0069_611613_611678_66	XUT0069	3	TRUE	TRUE	FALSE	FALSE	FALSE	FALSE	FALSE	FALSE	FALSE
chr02	611697	611717	+	21	XUT0069_611697_611717_21	XUT0069	6	TRUE	TRUE	FALSE	FALSE	FALSE	FALSE	FALSE	FALSE	FALSE
chr02	611853	611885	+	33	XUT0069_611853_611885_33	XUT0069	8	TRUE	TRUE	FALSE	FALSE	FALSE	FALSE	FALSE	FALSE	FALSE
chr02	611949	611987	+	39	XUT0069_611949_611987_39	XUT0069	10	TRUE	TRUE	FALSE	FALSE	FALSE	FALSE	FALSE	FALSE	FALSE
chr02	611515	611613	+	99	XUT0069_611515_611613_99	XUT0069	1	TRUE	TRUE	FALSE	FALSE	FALSE	FALSE	FALSE	FALSE	FALSE
chr02	611644	611775	+	132	XUT0069_611644_611775_132	XUT0069	4	TRUE	TRUE	TRUE	FALSE	TRUE	FALSE	TRUE	TRUE	TRUE
chr02	611833	611853	+	21	XUT0069_611833_611853_21	XUT0069	7	TRUE	TRUE	FALSE	FALSE	FALSE	FALSE	FALSE	FALSE	FALSE
chr02	611860	611874	+	15	XUT0069_611860_611874_15	XUT0069	9	TRUE	TRUE	FALSE	FALSE	FALSE	FALSE	FALSE	FALSE	FALSE
chr02	614655	614744	+	90	XUT0070_614655_614744_90	XUT0070	4	FALSE	TRUE	FALSE	FALSE	FALSE	FALSE	FALSE	FALSE	FALSE
chr02	614479	614580	+	102	XUT0070_614479_614580_102	XUT0070	1	FALSE	TRUE	FALSE	FALSE	FALSE	FALSE	TRUE	TRUE	FALSE
chr02	614486	614536	+	51	XUT0070_614486_614536_51	XUT0070	2	FALSE	TRUE	TRUE	FALSE	FALSE	FALSE	TRUE	TRUE	FALSE
chr02	614585	614692	+	108	XUT0070_614585_614692_108	XUT0070	3	FALSE	TRUE	FALSE	FALSE	FALSE	FALSE	TRUE	TRUE	TRUE
chr02	614753	614773	+	21	XUT0070_614753_614773_21	XUT0070	5	FALSE	TRUE	FALSE	FALSE	FALSE	FALSE	FALSE	FALSE	FALSE
chr02	615618	615752	+	135	XUT0071_615618_615752_135	XUT0071	3	FALSE	TRUE	FALSE	FALSE	FALSE	FALSE	FALSE	FALSE	FALSE
chr02	616011	616073	+	63	XUT0071_616011_616073_63	XUT0071	5	FALSE	TRUE	FALSE	FALSE	FALSE	FALSE	FALSE	FALSE	FALSE
chr02	615523	615543	+	21	XUT0071_615523_615543_21	XUT0071	1	FALSE	TRUE	FALSE	FALSE	FALSE	FALSE	FALSE	FALSE	FALSE
chr02	615598	615615	+	18	XUT0071_615598_615615_18	XUT0071	2	FALSE	TRUE	FALSE	FALSE	FALSE	FALSE	FALSE	FALSE	FALSE
chr02	616039	616122	+	84	XUT0071_616039_616122_84	XUT0071	6	FALSE	TRUE	FALSE	FALSE	FALSE	FALSE	FALSE	FALSE	FALSE
chr02	615974	615997	+	24	XUT0071_615974_615997_24	XUT0071	4	FALSE	TRUE	FALSE	FALSE	FALSE	FALSE	FALSE	FALSE	FALSE
chr02	629583	629621	-	39	XUT0987_629583_629621_39	XUT0987	2	TRUE	TRUE	FALSE	FALSE	FALSE	FALSE	FALSE	FALSE	FALSE
chr02	629298	629318	-	21	XUT0987_629298_629318_21	XUT0987	7	TRUE	TRUE	FALSE	FALSE	FALSE	FALSE	FALSE	FALSE	FALSE
chr02	629621	629704	-	84	XUT0987_629621_629704_84	XUT0987	1	TRUE	TRUE	TRUE	FALSE	TRUE	FALSE	TRUE	TRUE	TRUE
chr02	629573	629602	-	30	XUT0987_629573_629602_30	XUT0987	3	TRUE	TRUE	FALSE	FALSE	FALSE	FALSE	FALSE	FALSE	FALSE
chr02	629327	629353	-	27	XUT0987_629327_629353_27	XUT0987	6	TRUE	TRUE	FALSE	FALSE	FALSE	FALSE	FALSE	FALSE	FALSE
chr02	629183	629257	-	75	XUT0987_629183_629257_75	XUT0987	8	TRUE	TRUE	FALSE	FALSE	FALSE	FALSE	FALSE	FALSE	FALSE
chr02	629464	629508	-	45	XUT0987_629464_629508_45	XUT0987	4	TRUE	TRUE	FALSE	FALSE	FALSE	FALSE	FALSE	FALSE	FALSE
chr02	629428	629457	-	30	XUT0987_629428_629457_30	XUT0987	5	TRUE	TRUE	FALSE	FALSE	FALSE	FALSE	FALSE	FALSE	FALSE
chr02	643344	643451	+	108	XUT0072_643344_643451_108	XUT0072	2	FALSE	TRUE	FALSE	FALSE	FALSE	FALSE	FALSE	FALSE	FALSE
chr02	643455	643490	+	36	XUT0072_643455_643490_36	XUT0072	4	FALSE	TRUE	FALSE	FALSE	FALSE	FALSE	FALSE	FALSE	FALSE
chr02	644304	644330	+	27	XUT0072_644304_644330_27	XUT0072	11	FALSE	TRUE	FALSE	FALSE	FALSE	FALSE	FALSE	FALSE	FALSE
chr02	644775	644792	+	18	XUT0072_644775_644792_18	XUT0072	17	FALSE	TRUE	FALSE	FALSE	FALSE	FALSE	FALSE	FALSE	FALSE
chr02	644847	644891	+	45	XUT0072_644847_644891_45	XUT0072	18	FALSE	TRUE	FALSE	FALSE	FALSE	FALSE	FALSE	FALSE	FALSE
chr02	643315	643344	+	30	XUT0072_643315_643344_30	XUT0072	1	FALSE	TRUE	FALSE	FALSE	FALSE	FALSE	FALSE	FALSE	FALSE
chr02	643597	643635	+	39	XUT0072_643597_643635_39	XUT0072	6	FALSE	TRUE	FALSE	FALSE	FALSE	FALSE	FALSE	FALSE	FALSE
chr02	644074	644169	+	96	XUT0072_644074_644169_96	XUT0072	8	FALSE	TRUE	FALSE	FALSE	FALSE	FALSE	FALSE	FALSE	FALSE
chr02	644191	644268	+	78	XUT0072_644191_644268_78	XUT0072	9	FALSE	TRUE	FALSE	FALSE	FALSE	FALSE	FALSE	FALSE	FALSE
chr02	644488	644586	+	99	XUT0072_644488_644586_99	XUT0072	13	FALSE	TRUE	FALSE	FALSE	FALSE	FALSE	FALSE	FALSE	FALSE
chr02	644734	644847	+	114	XUT0072_644734_644847_114	XUT0072	16	FALSE	TRUE	FALSE	FALSE	FALSE	FALSE	FALSE	FALSE	FALSE
chr02	644863	644880	+	18	XUT0072_644863_644880_18	XUT0072	19	FALSE	TRUE	FALSE	FALSE	FALSE	FALSE	FALSE	FALSE	FALSE
chr02	644965	645009	+	45	XUT0072_644965_645009_45	XUT0072	21	FALSE	TRUE	FALSE	FALSE	FALSE	FALSE	FALSE	FALSE	FALSE
chr02	643451	643465	+	15	XUT0072_643451_643465_15	XUT0072	3	FALSE	TRUE	FALSE	FALSE	FALSE	FALSE	FALSE	FALSE	FALSE
chr02	643487	643504	+	18	XUT0072_643487_643504_18	XUT0072	5	FALSE	TRUE	FALSE	FALSE	FALSE	FALSE	FALSE	FALSE	FALSE
chr02	643829	643858	+	30	XUT0072_643829_643858_30	XUT0072	7	FALSE	TRUE	FALSE	FALSE	FALSE	FALSE	FALSE	FALSE	FALSE
chr02	644210	644323	+	114	XUT0072_644210_644323_114	XUT0072	10	FALSE	TRUE	FALSE	FALSE	FALSE	FALSE	FALSE	FALSE	FALSE
chr02	644372	644485	+	114	XUT0072_644372_644485_114	XUT0072	12	FALSE	TRUE	FALSE	FALSE	FALSE	FALSE	FALSE	FALSE	FALSE
chr02	644513	644554	+	42	XUT0072_644513_644554_42	XUT0072	14	FALSE	TRUE	FALSE	FALSE	FALSE	FALSE	FALSE	FALSE	FALSE
chr02	644579	644620	+	42	XUT0072_644579_644620_42	XUT0072	15	FALSE	TRUE	FALSE	FALSE	FALSE	FALSE	FALSE	FALSE	FALSE
chr02	644948	644965	+	18	XUT0072_644948_644965_18	XUT0072	20	FALSE	TRUE	FALSE	FALSE	FALSE	FALSE	FALSE	FALSE	FALSE
chr02	644514	644537	-	24	XUT0988_644514_644537_24	XUT0988	6	TRUE	TRUE	FALSE	FALSE	FALSE	FALSE	FALSE	FALSE	FALSE
chr02	644271	644312	-	42	XUT0988_644271_644312_42	XUT0988	8	TRUE	TRUE	FALSE	FALSE	FALSE	FALSE	FALSE	FALSE	FALSE
chr02	644190	644228	-	39	XUT0988_644190_644228_39	XUT0988	10	TRUE	TRUE	FALSE	FALSE	FALSE	FALSE	FALSE	FALSE	FALSE
chr02	644046	644063	-	18	XUT0988_644046_644063_18	XUT0988	12	TRUE	TRUE	FALSE	FALSE	FALSE	FALSE	FALSE	FALSE	FALSE
chr02	643992	644030	-	39	XUT0988_643992_644030_39	XUT0988	13	TRUE	TRUE	FALSE	FALSE	FALSE	FALSE	FALSE	FALSE	FALSE
chr02	643884	643976	-	93	XUT0988_643884_643976_93	XUT0988	14	TRUE	TRUE	FALSE	FALSE	FALSE	FALSE	FALSE	FALSE	FALSE
chr02	643845	643859	-	15	XUT0988_643845_643859_15	XUT0988	15	TRUE	TRUE	FALSE	FALSE	FALSE	FALSE	FALSE	FALSE	FALSE
chr02	643701	643820	-	120	XUT0988_643701_643820_120	XUT0988	17	TRUE	TRUE	FALSE	FALSE	FALSE	FALSE	FALSE	FALSE	FALSE
chr02	644681	644902	-	222	XUT0988_644681_644902_222	XUT0988	2	TRUE	TRUE	FALSE	FALSE	FALSE	FALSE	FALSE	FALSE	FALSE
chr02	644534	644596	-	63	XUT0988_644534_644596_63	XUT0988	5	TRUE	TRUE	FALSE	FALSE	FALSE	FALSE	FALSE	FALSE	FALSE
chr02	644426	644497	-	72	XUT0988_644426_644497_72	XUT0988	7	TRUE	TRUE	FALSE	FALSE	FALSE	FALSE	FALSE	FALSE	FALSE
chr02	644099	644164	-	66	XUT0988_644099_644164_66	XUT0988	11	TRUE	TRUE	TRUE	FALSE	FALSE	FALSE	FALSE	FALSE	FALSE
chr02	643712	643738	-	27	XUT0988_643712_643738_27	XUT0988	18	TRUE	TRUE	FALSE	FALSE	FALSE	FALSE	FALSE	FALSE	FALSE
chr02	643631	643675	-	45	XUT0988_643631_643675_45	XUT0988	19	TRUE	TRUE	FALSE	FALSE	FALSE	FALSE	FALSE	FALSE	FALSE
chr02	644905	644949	-	45	XUT0988_644905_644949_45	XUT0988	1	TRUE	TRUE	TRUE	FALSE	TRUE	TRUE	TRUE	TRUE	TRUE
chr02	644635	644829	-	195	XUT0988_644635_644829_195	XUT0988	3	TRUE	TRUE	FALSE	FALSE	FALSE	FALSE	FALSE	FALSE	FALSE
chr02	644617	644631	-	15	XUT0988_644617_644631_15	XUT0988	4	TRUE	TRUE	FALSE	FALSE	FALSE	FALSE	FALSE	FALSE	FALSE
chr02	644239	644268	-	30	XUT0988_644239_644268_30	XUT0988	9	TRUE	TRUE	FALSE	FALSE	FALSE	FALSE	FALSE	FALSE	FALSE
chr02	643768	643830	-	63	XUT0988_643768_643830_63	XUT0988	16	TRUE	TRUE	FALSE	FALSE	FALSE	FALSE	FALSE	FALSE	FALSE
chr02	643594	643635	-	42	XUT0988_643594_643635_42	XUT0988	20	TRUE	TRUE	FALSE	FALSE	FALSE	FALSE	FALSE	FALSE	FALSE
chr02	652577	652633	-	57	XUT0989_652577_652633_57	XUT0989	1	TRUE	TRUE	FALSE	FALSE	FALSE	FALSE	FALSE	FALSE	FALSE
chr02	652418	652453	-	36	XUT0989_652418_652453_36	XUT0989	5	TRUE	TRUE	FALSE	FALSE	FALSE	FALSE	FALSE	FALSE	FALSE
chr02	652187	652216	-	30	XUT0989_652187_652216_30	XUT0989	11	TRUE	TRUE	FALSE	FALSE	FALSE	FALSE	FALSE	FALSE	FALSE
chr02	651773	651808	-	36	XUT0989_651773_651808_36	XUT0989	15	TRUE	TRUE	FALSE	FALSE	FALSE	FALSE	FALSE	FALSE	FALSE
chr02	651680	651709	-	30	XUT0989_651680_651709_30	XUT0989	16	TRUE	TRUE	FALSE	FALSE	FALSE	FALSE	FALSE	FALSE	FALSE
chr02	652570	652587	-	18	XUT0989_652570_652587_18	XUT0989	2	TRUE	TRUE	FALSE	FALSE	FALSE	FALSE	FALSE	FALSE	FALSE
chr02	652444	652461	-	18	XUT0989_652444_652461_18	XUT0989	4	TRUE	TRUE	FALSE	FALSE	FALSE	FALSE	FALSE	FALSE	FALSE
chr02	652384	652413	-	30	XUT0989_652384_652413_30	XUT0989	6	TRUE	TRUE	FALSE	FALSE	FALSE	FALSE	FALSE	FALSE	FALSE
chr02	652309	652332	-	24	XUT0989_652309_652332_24	XUT0989	7	TRUE	TRUE	FALSE	FALSE	FALSE	FALSE	FALSE	FALSE	FALSE
chr02	652009	652089	-	81	XUT0989_652009_652089_81	XUT0989	12	TRUE	TRUE	FALSE	FALSE	FALSE	FALSE	FALSE	FALSE	FALSE
chr02	651709	651831	-	123	XUT0989_651709_651831_123	XUT0989	14	TRUE	TRUE	FALSE	FALSE	FALSE	FALSE	FALSE	FALSE	FALSE
chr02	652323	652520	-	198	XUT0989_652323_652520_198	XUT0989	3	TRUE	TRUE	FALSE	FALSE	FALSE	FALSE	FALSE	FALSE	FALSE
chr02	652293	652313	-	21	XUT0989_652293_652313_21	XUT0989	8	TRUE	TRUE	FALSE	FALSE	FALSE	FALSE	FALSE	FALSE	FALSE
chr02	652251	652283	-	33	XUT0989_652251_652283_33	XUT0989	9	TRUE	TRUE	FALSE	FALSE	FALSE	FALSE	FALSE	FALSE	FALSE
chr02	652029	652232	-	204	XUT0989_652029_652232_204	XUT0989	10	TRUE	TRUE	FALSE	FALSE	FALSE	FALSE	FALSE	FALSE	FALSE
chr02	651831	651869	-	39	XUT0989_651831_651869_39	XUT0989	13	TRUE	TRUE	FALSE	FALSE	FALSE	FALSE	FALSE	FALSE	FALSE
chr02	653289	653339	-	51	XUT0990_653289_653339_51	XUT0990	1	TRUE	TRUE	FALSE	FALSE	FALSE	FALSE	FALSE	FALSE	FALSE
chr02	654982	655113	-	132	XUT0991_654982_655113_132	XUT0991	1	FALSE	TRUE	FALSE	FALSE	FALSE	FALSE	FALSE	FALSE	FALSE
chr02	676743	676790	+	48	XUT0073_676743_676790_48	XUT0073	3	TRUE	TRUE	FALSE	FALSE	FALSE	FALSE	FALSE	FALSE	FALSE
chr02	676821	676880	+	60	XUT0073_676821_676880_60	XUT0073	4	TRUE	TRUE	FALSE	FALSE	FALSE	FALSE	FALSE	FALSE	FALSE
chr02	676594	676611	+	18	XUT0073_676594_676611_18	XUT0073	2	TRUE	TRUE	FALSE	FALSE	FALSE	FALSE	FALSE	FALSE	FALSE
chr02	676571	676594	+	24	XUT0073_676571_676594_24	XUT0073	1	TRUE	TRUE	FALSE	FALSE	FALSE	FALSE	FALSE	FALSE	FALSE
chr02	697898	697954	-	57	XUT0992_697898_697954_57	XUT0992	1	FALSE	TRUE	FALSE	FALSE	FALSE	FALSE	FALSE	FALSE	FALSE
chr02	697861	697929	-	69	XUT0992_697861_697929_69	XUT0992	2	FALSE	TRUE	FALSE	FALSE	FALSE	FALSE	FALSE	FALSE	FALSE
chr02	698011	698034	+	24	XUT0075_698011_698034_24	XUT0075	3	TRUE	TRUE	FALSE	FALSE	FALSE	FALSE	FALSE	FALSE	FALSE
chr02	698419	698454	+	36	XUT0075_698419_698454_36	XUT0075	5	TRUE	TRUE	FALSE	FALSE	FALSE	FALSE	FALSE	FALSE	FALSE
chr02	697928	697966	+	39	XUT0075_697928_697966_39	XUT0075	1	TRUE	TRUE	FALSE	FALSE	FALSE	FALSE	FALSE	FALSE	FALSE
chr02	698438	698464	+	27	XUT0075_698438_698464_27	XUT0075	6	TRUE	TRUE	FALSE	FALSE	FALSE	FALSE	FALSE	FALSE	FALSE
chr02	697953	697985	+	33	XUT0075_697953_697985_33	XUT0075	2	TRUE	TRUE	FALSE	FALSE	FALSE	FALSE	FALSE	FALSE	FALSE
chr02	698169	698438	+	270	XUT0075_698169_698438_270	XUT0075	4	TRUE	TRUE	TRUE	FALSE	FALSE	FALSE	TRUE	TRUE	FALSE
chr02	698457	698537	+	81	XUT0075_698457_698537_81	XUT0075	7	TRUE	TRUE	FALSE	FALSE	FALSE	FALSE	FALSE	FALSE	FALSE
chr02	698562	698642	+	81	XUT0075_698562_698642_81	XUT0075	8	TRUE	TRUE	FALSE	FALSE	FALSE	FALSE	FALSE	FALSE	FALSE
chr02	703589	703642	+	54	XUT0076_703589_703642_54	XUT0076	1	TRUE	TRUE	FALSE	FALSE	FALSE	FALSE	FALSE	FALSE	FALSE
chr02	703679	703744	+	66	XUT0076_703679_703744_66	XUT0076	2	TRUE	TRUE	FALSE	FALSE	FALSE	FALSE	FALSE	FALSE	FALSE
chr02	703769	703798	+	30	XUT0076_703769_703798_30	XUT0076	3	TRUE	TRUE	FALSE	FALSE	FALSE	FALSE	FALSE	FALSE	FALSE
chr02	703817	703909	+	93	XUT0076_703817_703909_93	XUT0076	4	TRUE	TRUE	FALSE	FALSE	FALSE	FALSE	FALSE	FALSE	FALSE
chr02	703931	704059	+	129	XUT0076_703931_704059_129	XUT0076	6	TRUE	TRUE	FALSE	FALSE	FALSE	FALSE	FALSE	FALSE	FALSE
chr02	704234	704323	+	90	XUT0076_704234_704323_90	XUT0076	7	TRUE	TRUE	FALSE	FALSE	FALSE	FALSE	FALSE	FALSE	FALSE
chr02	703860	703994	+	135	XUT0076_703860_703994_135	XUT0076	5	TRUE	TRUE	FALSE	FALSE	FALSE	FALSE	FALSE	FALSE	FALSE
chr02	704909	704935	-	27	XUT0993_704909_704935_27	XUT0993	1	TRUE	TRUE	FALSE	FALSE	FALSE	FALSE	FALSE	FALSE	FALSE
chr02	704867	704899	-	33	XUT0993_704867_704899_33	XUT0993	2	TRUE	TRUE	FALSE	FALSE	FALSE	FALSE	FALSE	FALSE	FALSE
chr02	704686	704700	-	15	XUT0993_704686_704700_15	XUT0993	4	TRUE	TRUE	FALSE	FALSE	FALSE	FALSE	FALSE	FALSE	FALSE
chr02	704602	704631	-	30	XUT0993_704602_704631_30	XUT0993	5	TRUE	TRUE	FALSE	FALSE	FALSE	FALSE	FALSE	FALSE	FALSE
chr02	704736	704801	-	66	XUT0993_704736_704801_66	XUT0993	3	TRUE	TRUE	FALSE	FALSE	FALSE	FALSE	FALSE	FALSE	FALSE
chr02	722675	722716	-	42	XUT0994_722675_722716_42	XUT0994	2	TRUE	TRUE	FALSE	FALSE	FALSE	FALSE	FALSE	FALSE	FALSE
chr02	722471	722539	-	69	XUT0994_722471_722539_69	XUT0994	4	TRUE	TRUE	FALSE	FALSE	FALSE	FALSE	FALSE	FALSE	FALSE
chr02	722405	722425	-	21	XUT0994_722405_722425_21	XUT0994	6	TRUE	TRUE	FALSE	FALSE	FALSE	FALSE	FALSE	FALSE	FALSE
chr02	722431	722502	-	72	XUT0994_722431_722502_72	XUT0994	5	TRUE	TRUE	FALSE	FALSE	FALSE	FALSE	FALSE	FALSE	FALSE
chr02	722308	722340	-	33	XUT0994_722308_722340_33	XUT0994	8	TRUE	TRUE	FALSE	FALSE	FALSE	FALSE	FALSE	FALSE	FALSE
chr02	722748	722768	-	21	XUT0994_722748_722768_21	XUT0994	1	TRUE	TRUE	FALSE	FALSE	FALSE	FALSE	FALSE	FALSE	FALSE
chr02	722646	722708	-	63	XUT0994_722646_722708_63	XUT0994	3	TRUE	TRUE	FALSE	FALSE	FALSE	FALSE	FALSE	FALSE	FALSE
chr02	722355	722399	-	45	XUT0994_722355_722399_45	XUT0994	7	TRUE	TRUE	FALSE	FALSE	FALSE	FALSE	FALSE	FALSE	FALSE
chr02	722304	722327	-	24	XUT0994_722304_722327_24	XUT0994	9	TRUE	TRUE	FALSE	FALSE	FALSE	FALSE	FALSE	FALSE	FALSE
chr02	739478	739552	-	75	XUT0995_739478_739552_75	XUT0995	2	TRUE	TRUE	FALSE	FALSE	FALSE	FALSE	FALSE	FALSE	FALSE
chr02	739402	739473	-	72	XUT0995_739402_739473_72	XUT0995	3	TRUE	TRUE	FALSE	FALSE	FALSE	FALSE	FALSE	FALSE	FALSE
chr02	739291	739308	-	18	XUT0995_739291_739308_18	XUT0995	4	TRUE	TRUE	FALSE	FALSE	FALSE	FALSE	FALSE	FALSE	FALSE
chr02	739455	739562	-	108	XUT0995_739455_739562_108	XUT0995	1	TRUE	TRUE	FALSE	FALSE	FALSE	FALSE	FALSE	FALSE	FALSE
chr02	764211	764225	+	15	XUT0078_764211_764225_15	XUT0078	1	TRUE	TRUE	FALSE	FALSE	FALSE	FALSE	FALSE	FALSE	FALSE
chr02	764379	764453	+	75	XUT0078_764379_764453_75	XUT0078	2	TRUE	TRUE	FALSE	FALSE	FALSE	FALSE	FALSE	FALSE	FALSE
chr02	764502	764543	+	42	XUT0078_764502_764543_42	XUT0078	3	TRUE	TRUE	FALSE	FALSE	FALSE	FALSE	FALSE	FALSE	FALSE
chr02	764565	764600	+	36	XUT0078_764565_764600_36	XUT0078	5	TRUE	TRUE	FALSE	FALSE	FALSE	FALSE	FALSE	FALSE	FALSE
chr02	764530	764559	+	30	XUT0078_764530_764559_30	XUT0078	4	TRUE	TRUE	FALSE	FALSE	FALSE	FALSE	FALSE	FALSE	FALSE
chr02	764696	764719	+	24	XUT0078_764696_764719_24	XUT0078	6	TRUE	TRUE	FALSE	FALSE	FALSE	FALSE	FALSE	FALSE	FALSE
chr02	770803	770853	-	51	XUT0996_770803_770853_51	XUT0996	2	TRUE	TRUE	FALSE	FALSE	FALSE	FALSE	FALSE	FALSE	FALSE
chr02	771008	771034	-	27	XUT0996_771008_771034_27	XUT0996	1	TRUE	TRUE	FALSE	FALSE	FALSE	FALSE	FALSE	FALSE	FALSE
chr02	774411	774443	-	33	XUT0997_774411_774443_33	XUT0997	1	TRUE	TRUE	FALSE	FALSE	FALSE	FALSE	FALSE	FALSE	FALSE
chr02	774084	774167	-	84	XUT0997_774084_774167_84	XUT0997	4	TRUE	TRUE	FALSE	FALSE	FALSE	FALSE	FALSE	FALSE	FALSE
chr02	774005	774142	-	138	XUT0997_774005_774142_138	XUT0997	5	TRUE	TRUE	FALSE	FALSE	FALSE	FALSE	FALSE	FALSE	FALSE
chr02	773903	773992	-	90	XUT0997_773903_773992_90	XUT0997	6	TRUE	TRUE	FALSE	FALSE	FALSE	FALSE	FALSE	FALSE	FALSE
chr02	774328	774375	-	48	XUT0997_774328_774375_48	XUT0997	2	TRUE	TRUE	TRUE	FALSE	FALSE	FALSE	FALSE	FALSE	FALSE
chr02	774160	774255	-	96	XUT0997_774160_774255_96	XUT0997	3	TRUE	TRUE	FALSE	FALSE	FALSE	FALSE	FALSE	FALSE	FALSE
chr02	784482	784556	+	75	XUT0079_784482_784556_75	XUT0079	1	FALSE	FALSE	FALSE	FALSE	FALSE	FALSE	TRUE	TRUE	FALSE
chr02	792393	792428	-	36	XUT0999_792393_792428_36	XUT0999	3	TRUE	TRUE	FALSE	FALSE	FALSE	FALSE	FALSE	FALSE	FALSE
chr02	792312	792350	-	39	XUT0999_792312_792350_39	XUT0999	4	TRUE	TRUE	FALSE	FALSE	FALSE	FALSE	FALSE	FALSE	FALSE
chr02	791982	792029	-	48	XUT0999_791982_792029_48	XUT0999	7	TRUE	TRUE	TRUE	FALSE	TRUE	TRUE	TRUE	TRUE	TRUE
chr02	791838	791900	-	63	XUT0999_791838_791900_63	XUT0999	9	TRUE	TRUE	TRUE	FALSE	TRUE	TRUE	TRUE	TRUE	TRUE
chr02	791097	791156	-	60	XUT0999_791097_791156_60	XUT0999	15	TRUE	TRUE	FALSE	FALSE	FALSE	FALSE	FALSE	FALSE	FALSE
chr02	790758	790844	-	87	XUT0999_790758_790844_87	XUT0999	18	TRUE	TRUE	FALSE	FALSE	FALSE	FALSE	FALSE	FALSE	FALSE
chr02	790671	790697	-	27	XUT0999_790671_790697_27	XUT0999	21	TRUE	TRUE	FALSE	FALSE	FALSE	FALSE	FALSE	FALSE	FALSE
chr02	790239	790457	-	219	XUT0999_790239_790457_219	XUT0999	23	TRUE	TRUE	FALSE	FALSE	FALSE	FALSE	FALSE	FALSE	FALSE
chr02	789999	790013	-	15	XUT0999_789999_790013_15	XUT0999	27	TRUE	TRUE	FALSE	FALSE	FALSE	FALSE	FALSE	FALSE	FALSE
chr02	789600	789989	-	390	XUT0999_789600_789989_390	XUT0999	28	TRUE	TRUE	TRUE	FALSE	FALSE	FALSE	FALSE	FALSE	FALSE
chr02	789357	789449	-	93	XUT0999_789357_789449_93	XUT0999	33	TRUE	TRUE	FALSE	FALSE	FALSE	FALSE	FALSE	FALSE	FALSE
chr02	788925	788987	-	63	XUT0999_788925_788987_63	XUT0999	38	TRUE	TRUE	FALSE	FALSE	FALSE	FALSE	FALSE	FALSE	FALSE
chr02	792461	792559	-	99	XUT0999_792461_792559_99	XUT0999	1	TRUE	TRUE	TRUE	FALSE	TRUE	FALSE	FALSE	TRUE	FALSE
chr02	792125	792142	-	18	XUT0999_792125_792142_18	XUT0999	5	TRUE	TRUE	FALSE	FALSE	FALSE	FALSE	FALSE	FALSE	FALSE
chr02	791651	791740	-	90	XUT0999_791651_791740_90	XUT0999	10	TRUE	TRUE	FALSE	FALSE	FALSE	FALSE	FALSE	FALSE	FALSE
chr02	791345	791410	-	66	XUT0999_791345_791410_66	XUT0999	12	TRUE	TRUE	FALSE	FALSE	FALSE	FALSE	FALSE	FALSE	FALSE
chr02	791258	791287	-	30	XUT0999_791258_791287_30	XUT0999	14	TRUE	TRUE	FALSE	FALSE	FALSE	FALSE	FALSE	FALSE	FALSE
chr02	790829	790993	-	165	XUT0999_790829_790993_165	XUT0999	17	TRUE	TRUE	TRUE	FALSE	FALSE	TRUE	FALSE	TRUE	FALSE
chr02	790727	790807	-	81	XUT0999_790727_790807_81	XUT0999	19	TRUE	TRUE	FALSE	FALSE	FALSE	FALSE	FALSE	FALSE	FALSE
chr02	790520	790582	-	63	XUT0999_790520_790582_63	XUT0999	22	TRUE	TRUE	TRUE	FALSE	FALSE	TRUE	FALSE	TRUE	FALSE
chr02	790067	790162	-	96	XUT0999_790067_790162_96	XUT0999	24	TRUE	TRUE	TRUE	FALSE	FALSE	TRUE	FALSE	TRUE	FALSE
chr02	790013	790027	-	15	XUT0999_790013_790027_15	XUT0999	26	TRUE	TRUE	FALSE	FALSE	FALSE	FALSE	FALSE	FALSE	FALSE
chr02	789965	789979	-	15	XUT0999_789965_789979_15	XUT0999	29	TRUE	TRUE	FALSE	FALSE	FALSE	FALSE	FALSE	FALSE	FALSE
chr02	789722	789742	-	21	XUT0999_789722_789742_21	XUT0999	30	TRUE	TRUE	FALSE	FALSE	FALSE	FALSE	FALSE	FALSE	FALSE
chr02	789176	789316	-	141	XUT0999_789176_789316_141	XUT0999	34	TRUE	TRUE	TRUE	FALSE	FALSE	TRUE	FALSE	TRUE	FALSE
chr02	788987	789070	-	84	XUT0999_788987_789070_84	XUT0999	37	TRUE	TRUE	FALSE	FALSE	FALSE	FALSE	FALSE	FALSE	FALSE
chr02	788600	788626	-	27	XUT0999_788600_788626_27	XUT0999	40	TRUE	TRUE	FALSE	FALSE	FALSE	FALSE	FALSE	FALSE	FALSE
chr02	792472	792525	-	54	XUT0999_792472_792525_54	XUT0999	2	TRUE	TRUE	FALSE	FALSE	FALSE	FALSE	FALSE	FALSE	FALSE
chr02	792067	792108	-	42	XUT0999_792067_792108_42	XUT0999	6	TRUE	TRUE	FALSE	FALSE	FALSE	FALSE	FALSE	FALSE	FALSE
chr02	791923	791979	-	57	XUT0999_791923_791979_57	XUT0999	8	TRUE	TRUE	FALSE	FALSE	FALSE	TRUE	FALSE	TRUE	FALSE
chr02	791473	791646	-	174	XUT0999_791473_791646_174	XUT0999	11	TRUE	TRUE	TRUE	FALSE	FALSE	TRUE	TRUE	TRUE	FALSE
chr02	791335	791352	-	18	XUT0999_791335_791352_18	XUT0999	13	TRUE	TRUE	FALSE	FALSE	FALSE	FALSE	FALSE	FALSE	FALSE
chr02	791050	791097	-	48	XUT0999_791050_791097_48	XUT0999	16	TRUE	TRUE	FALSE	FALSE	FALSE	FALSE	FALSE	FALSE	FALSE
chr02	790714	790731	-	18	XUT0999_790714_790731_18	XUT0999	20	TRUE	TRUE	FALSE	FALSE	FALSE	FALSE	FALSE	FALSE	FALSE
chr02	790030	790080	-	51	XUT0999_790030_790080_51	XUT0999	25	TRUE	TRUE	FALSE	FALSE	FALSE	FALSE	FALSE	FALSE	FALSE
chr02	789517	789579	-	63	XUT0999_789517_789579_63	XUT0999	31	TRUE	TRUE	FALSE	FALSE	FALSE	FALSE	FALSE	FALSE	FALSE
chr02	789430	789498	-	69	XUT0999_789430_789498_69	XUT0999	32	TRUE	TRUE	FALSE	FALSE	FALSE	FALSE	FALSE	FALSE	FALSE
chr02	789241	789267	-	27	XUT0999_789241_789267_27	XUT0999	35	TRUE	TRUE	FALSE	FALSE	FALSE	FALSE	FALSE	FALSE	FALSE
chr02	789103	789165	-	63	XUT0999_789103_789165_63	XUT0999	36	TRUE	TRUE	FALSE	FALSE	FALSE	FALSE	FALSE	FALSE	FALSE
chr02	788620	788637	-	18	XUT0999_788620_788637_18	XUT0999	39	TRUE	TRUE	FALSE	FALSE	FALSE	FALSE	FALSE	FALSE	FALSE
chr02	794301	794519	-	219	XUT1000_794301_794519_219	XUT1000	7	TRUE	TRUE	FALSE	FALSE	FALSE	FALSE	FALSE	FALSE	FALSE
chr02	794025	794045	-	21	XUT1000_794025_794045_21	XUT1000	10	TRUE	TRUE	FALSE	FALSE	FALSE	FALSE	FALSE	FALSE	FALSE
chr02	793866	793919	-	54	XUT1000_793866_793919_54	XUT1000	11	TRUE	TRUE	FALSE	FALSE	FALSE	FALSE	FALSE	FALSE	FALSE
chr02	793299	793409	-	111	XUT1000_793299_793409_111	XUT1000	14	TRUE	TRUE	FALSE	FALSE	FALSE	FALSE	FALSE	FALSE	FALSE
chr02	792927	793085	-	159	XUT1000_792927_793085_159	XUT1000	15	TRUE	TRUE	FALSE	FALSE	FALSE	FALSE	FALSE	FALSE	FALSE
chr02	795284	795301	-	18	XUT1000_795284_795301_18	XUT1000	1	TRUE	TRUE	FALSE	FALSE	FALSE	FALSE	FALSE	FALSE	FALSE
chr02	795122	795211	-	90	XUT1000_795122_795211_90	XUT1000	2	TRUE	TRUE	FALSE	FALSE	FALSE	FALSE	FALSE	FALSE	FALSE
chr02	794759	795052	-	294	XUT1000_794759_795052_294	XUT1000	3	TRUE	TRUE	FALSE	FALSE	FALSE	FALSE	FALSE	FALSE	FALSE
chr02	794678	794716	-	39	XUT1000_794678_794716_39	XUT1000	5	TRUE	TRUE	FALSE	FALSE	FALSE	FALSE	FALSE	FALSE	FALSE
chr02	794492	794554	-	63	XUT1000_794492_794554_63	XUT1000	6	TRUE	TRUE	FALSE	FALSE	FALSE	FALSE	FALSE	FALSE	FALSE
chr02	794324	794398	-	75	XUT1000_794324_794398_75	XUT1000	8	TRUE	TRUE	FALSE	FALSE	FALSE	FALSE	FALSE	FALSE	FALSE
chr02	794045	794083	-	39	XUT1000_794045_794083_39	XUT1000	9	TRUE	TRUE	FALSE	FALSE	FALSE	FALSE	FALSE	FALSE	FALSE
chr02	793409	793567	-	159	XUT1000_793409_793567_159	XUT1000	13	TRUE	TRUE	FALSE	FALSE	FALSE	FALSE	FALSE	FALSE	FALSE
chr02	794749	794778	-	30	XUT1000_794749_794778_30	XUT1000	4	TRUE	TRUE	FALSE	FALSE	FALSE	FALSE	FALSE	FALSE	FALSE
chr02	793522	793590	-	69	XUT1000_793522_793590_69	XUT1000	12	TRUE	TRUE	FALSE	FALSE	FALSE	FALSE	FALSE	FALSE	FALSE
chr02	806880	806894	-	15	XUT1002_806880_806894_15	XUT1002	2	TRUE	TRUE	FALSE	FALSE	FALSE	FALSE	FALSE	FALSE	FALSE
chr02	807026	807076	-	51	XUT1002_807026_807076_51	XUT1002	1	TRUE	TRUE	FALSE	FALSE	FALSE	FALSE	FALSE	FALSE	FALSE
chr02	807241	807279	+	39	XUT0081_807241_807279_39	XUT0081	1	TRUE	TRUE	FALSE	FALSE	FALSE	FALSE	FALSE	FALSE	FALSE
chr02	807355	807426	+	72	XUT0081_807355_807426_72	XUT0081	5	TRUE	TRUE	FALSE	FALSE	TRUE	FALSE	FALSE	TRUE	TRUE
chr02	807499	807519	+	21	XUT0081_807499_807519_21	XUT0081	6	TRUE	TRUE	FALSE	FALSE	FALSE	FALSE	FALSE	FALSE	FALSE
chr02	807889	807945	+	57	XUT0081_807889_807945_57	XUT0081	10	TRUE	TRUE	FALSE	FALSE	FALSE	FALSE	FALSE	FALSE	FALSE
chr02	808252	808266	+	15	XUT0081_808252_808266_15	XUT0081	13	TRUE	TRUE	FALSE	FALSE	FALSE	FALSE	FALSE	FALSE	FALSE
chr02	807263	807286	+	24	XUT0081_807263_807286_24	XUT0081	3	TRUE	TRUE	FALSE	FALSE	FALSE	FALSE	FALSE	FALSE	FALSE
chr02	807683	807733	+	51	XUT0081_807683_807733_51	XUT0081	9	TRUE	TRUE	FALSE	FALSE	FALSE	FALSE	FALSE	FALSE	FALSE
chr02	807249	807263	+	15	XUT0081_807249_807263_15	XUT0081	2	TRUE	TRUE	FALSE	FALSE	FALSE	FALSE	FALSE	FALSE	FALSE
chr02	807279	807407	+	129	XUT0081_807279_807407_129	XUT0081	4	TRUE	TRUE	FALSE	FALSE	TRUE	FALSE	FALSE	TRUE	TRUE
chr02	807588	807605	+	18	XUT0081_807588_807605_18	XUT0081	7	TRUE	TRUE	FALSE	FALSE	FALSE	FALSE	FALSE	FALSE	FALSE
chr02	807660	807677	+	18	XUT0081_807660_807677_18	XUT0081	8	TRUE	TRUE	FALSE	FALSE	FALSE	FALSE	FALSE	FALSE	FALSE
chr02	807939	807959	+	21	XUT0081_807939_807959_21	XUT0081	11	TRUE	TRUE	FALSE	FALSE	FALSE	FALSE	FALSE	FALSE	FALSE
chr02	808020	808097	+	78	XUT0081_808020_808097_78	XUT0081	12	TRUE	TRUE	FALSE	FALSE	FALSE	FALSE	FALSE	FALSE	FALSE
chr02	809568	809654	-	87	XUT1003_809568_809654_87	XUT1003	1	FALSE	TRUE	FALSE	FALSE	FALSE	FALSE	FALSE	FALSE	FALSE
chr02	809555	809647	-	93	XUT1003_809555_809647_93	XUT1003	2	FALSE	TRUE	FALSE	FALSE	FALSE	FALSE	FALSE	FALSE	FALSE
chr02	809936	809959	+	24	XUT0082_809936_809959_24	XUT0082	1	TRUE	TRUE	FALSE	FALSE	FALSE	FALSE	FALSE	FALSE	FALSE
chr02	809969	810013	+	45	XUT0082_809969_810013_45	XUT0082	2	TRUE	TRUE	FALSE	FALSE	FALSE	FALSE	FALSE	FALSE	FALSE
chr02	810059	810097	+	39	XUT0082_810059_810097_39	XUT0082	4	TRUE	TRUE	FALSE	FALSE	FALSE	FALSE	FALSE	FALSE	FALSE
chr02	810251	810295	+	45	XUT0082_810251_810295_45	XUT0082	7	TRUE	TRUE	FALSE	FALSE	FALSE	FALSE	FALSE	FALSE	FALSE
chr02	810201	810236	+	36	XUT0082_810201_810236_36	XUT0082	6	TRUE	TRUE	FALSE	FALSE	FALSE	FALSE	FALSE	FALSE	FALSE
chr02	810016	810111	+	96	XUT0082_810016_810111_96	XUT0082	3	TRUE	TRUE	FALSE	FALSE	FALSE	FALSE	FALSE	FALSE	FALSE
chr02	810145	810270	+	126	XUT0082_810145_810270_126	XUT0082	5	TRUE	TRUE	FALSE	FALSE	FALSE	FALSE	FALSE	FALSE	FALSE
chr03	29520	29564	+	45	XUT0083_29520_29564_45	XUT0083	1	TRUE	TRUE	TRUE	FALSE	TRUE	FALSE	FALSE	TRUE	FALSE
chr03	29592	29642	+	51	XUT0083_29592_29642_51	XUT0083	2	TRUE	TRUE	TRUE	TRUE	TRUE	FALSE	TRUE	TRUE	TRUE
chr03	29670	29714	+	45	XUT0083_29670_29714_45	XUT0083	3	TRUE	TRUE	TRUE	FALSE	TRUE	FALSE	FALSE	TRUE	TRUE
chr03	29788	29808	+	21	XUT0083_29788_29808_21	XUT0083	4	TRUE	TRUE	TRUE	FALSE	FALSE	FALSE	FALSE	FALSE	FALSE
chr03	29812	29931	+	120	XUT0083_29812_29931_120	XUT0083	5	TRUE	TRUE	FALSE	FALSE	FALSE	TRUE	TRUE	TRUE	TRUE
chr03	29935	29991	+	57	XUT0083_29935_29991_57	XUT0083	6	TRUE	TRUE	TRUE	FALSE	FALSE	TRUE	TRUE	TRUE	TRUE
chr03	30073	30105	+	33	XUT0083_30073_30105_33	XUT0083	8	TRUE	TRUE	FALSE	FALSE	FALSE	FALSE	FALSE	FALSE	FALSE
chr03	30056	30073	+	18	XUT0083_30056_30073_18	XUT0083	7	TRUE	TRUE	FALSE	FALSE	FALSE	FALSE	FALSE	FALSE	FALSE
chr03	30422	30436	+	15	XUT0083_30422_30436_15	XUT0083	9	TRUE	TRUE	FALSE	FALSE	FALSE	FALSE	FALSE	FALSE	FALSE
chr03	30048	30074	-	27	XUT1007_30048_30074_27	XUT1007	1	FALSE	FALSE	TRUE	FALSE	FALSE	FALSE	FALSE	FALSE	FALSE
chr03	30962	31039	-	78	XUT1008_30962_31039_78	XUT1008	1	FALSE	TRUE	TRUE	FALSE	TRUE	FALSE	TRUE	TRUE	FALSE
chr03	39200	39229	+	30	XUT0085_39200_39229_30	XUT0085	2	FALSE	TRUE	FALSE	FALSE	FALSE	FALSE	FALSE	FALSE	FALSE
chr03	39117	39140	+	24	XUT0085_39117_39140_24	XUT0085	1	FALSE	TRUE	FALSE	FALSE	FALSE	FALSE	FALSE	FALSE	FALSE
chr03	39234	39281	+	48	XUT0085_39234_39281_48	XUT0085	3	FALSE	TRUE	FALSE	FALSE	FALSE	FALSE	FALSE	FALSE	FALSE
chr03	39662	39802	+	141	XUT0086_39662_39802_141	XUT0086	1	TRUE	TRUE	TRUE	FALSE	FALSE	TRUE	TRUE	TRUE	TRUE
chr03	39821	39838	+	18	XUT0086_39821_39838_18	XUT0086	3	TRUE	TRUE	FALSE	FALSE	FALSE	FALSE	FALSE	FALSE	FALSE
chr03	40307	40459	+	153	XUT0086_40307_40459_153	XUT0086	5	TRUE	TRUE	FALSE	FALSE	FALSE	FALSE	FALSE	FALSE	FALSE
chr03	40565	40660	+	96	XUT0086_40565_40660_96	XUT0086	8	TRUE	TRUE	FALSE	FALSE	FALSE	FALSE	FALSE	FALSE	FALSE
chr03	40664	40717	+	54	XUT0086_40664_40717_54	XUT0086	9	TRUE	TRUE	FALSE	FALSE	FALSE	FALSE	FALSE	FALSE	FALSE
chr03	40020	40112	+	93	XUT0086_40020_40112_93	XUT0086	4	TRUE	TRUE	FALSE	FALSE	FALSE	FALSE	FALSE	FALSE	FALSE
chr03	39688	39741	+	54	XUT0086_39688_39741_54	XUT0086	2	TRUE	TRUE	TRUE	FALSE	FALSE	TRUE	TRUE	TRUE	TRUE
chr03	40318	40440	+	123	XUT0086_40318_40440_123	XUT0086	6	TRUE	TRUE	FALSE	FALSE	FALSE	FALSE	FALSE	FALSE	FALSE
chr03	40552	40572	+	21	XUT0086_40552_40572_21	XUT0086	7	TRUE	TRUE	FALSE	FALSE	FALSE	FALSE	FALSE	FALSE	FALSE
chr03	40969	41052	+	84	XUT0087_40969_41052_84	XUT0087	2	TRUE	TRUE	FALSE	FALSE	FALSE	FALSE	FALSE	FALSE	FALSE
chr03	40943	40966	+	24	XUT0087_40943_40966_24	XUT0087	1	TRUE	TRUE	FALSE	FALSE	FALSE	FALSE	FALSE	FALSE	FALSE
chr03	41313	41327	+	15	XUT0087_41313_41327_15	XUT0087	3	TRUE	TRUE	FALSE	FALSE	FALSE	FALSE	FALSE	FALSE	FALSE
chr03	53603	53638	-	36	XUT1009_53603_53638_36	XUT1009	2	TRUE	TRUE	FALSE	FALSE	FALSE	FALSE	FALSE	FALSE	FALSE
chr03	52964	53056	-	93	XUT1009_52964_53056_93	XUT1009	8	TRUE	TRUE	FALSE	FALSE	FALSE	FALSE	FALSE	FALSE	FALSE
chr03	53347	53442	-	96	XUT1009_53347_53442_96	XUT1009	5	TRUE	TRUE	FALSE	FALSE	FALSE	FALSE	FALSE	FALSE	FALSE
chr03	53116	53148	-	33	XUT1009_53116_53148_33	XUT1009	7	TRUE	TRUE	FALSE	FALSE	FALSE	FALSE	FALSE	FALSE	FALSE
chr03	52807	52923	-	117	XUT1009_52807_52923_117	XUT1009	10	TRUE	TRUE	FALSE	FALSE	FALSE	FALSE	FALSE	FALSE	FALSE
chr03	53736	53834	-	99	XUT1009_53736_53834_99	XUT1009	1	TRUE	TRUE	FALSE	FALSE	FALSE	FALSE	FALSE	FALSE	FALSE
chr03	53469	53495	-	27	XUT1009_53469_53495_27	XUT1009	3	TRUE	TRUE	FALSE	FALSE	FALSE	FALSE	FALSE	FALSE	FALSE
chr03	53268	53459	-	192	XUT1009_53268_53459_192	XUT1009	4	TRUE	TRUE	FALSE	FALSE	FALSE	FALSE	FALSE	FALSE	FALSE
chr03	53184	53231	-	48	XUT1009_53184_53231_48	XUT1009	6	TRUE	TRUE	FALSE	FALSE	FALSE	FALSE	FALSE	FALSE	FALSE
chr03	52953	53006	-	54	XUT1009_52953_53006_54	XUT1009	9	TRUE	TRUE	FALSE	FALSE	FALSE	FALSE	FALSE	FALSE	FALSE
chr03	52824	52862	-	39	XUT1009_52824_52862_39	XUT1009	11	TRUE	TRUE	FALSE	FALSE	FALSE	FALSE	FALSE	FALSE	FALSE
chr03	52539	52586	-	48	XUT1009_52539_52586_48	XUT1009	12	TRUE	TRUE	FALSE	FALSE	FALSE	FALSE	FALSE	FALSE	FALSE
chr03	74689	74871	+	183	XUT0088_74689_74871_183	XUT0088	1	TRUE	TRUE	FALSE	FALSE	FALSE	FALSE	FALSE	FALSE	FALSE
chr03	74917	75006	+	90	XUT0088_74917_75006_90	XUT0088	2	TRUE	TRUE	FALSE	FALSE	FALSE	FALSE	FALSE	FALSE	FALSE
chr03	75116	75232	+	117	XUT0088_75116_75232_117	XUT0088	4	TRUE	TRUE	FALSE	FALSE	FALSE	FALSE	FALSE	FALSE	FALSE
chr03	75236	75265	+	30	XUT0088_75236_75265_30	XUT0088	5	TRUE	TRUE	FALSE	FALSE	FALSE	FALSE	FALSE	FALSE	FALSE
chr03	74928	74993	+	66	XUT0088_74928_74993_66	XUT0088	3	TRUE	TRUE	FALSE	FALSE	FALSE	FALSE	FALSE	FALSE	FALSE
chr03	77476	77505	+	30	XUT0089_77476_77505_30	XUT0089	2	TRUE	TRUE	FALSE	FALSE	FALSE	FALSE	FALSE	FALSE	FALSE
chr03	77548	77631	+	84	XUT0089_77548_77631_84	XUT0089	3	TRUE	TRUE	FALSE	FALSE	FALSE	FALSE	FALSE	FALSE	FALSE
chr03	77767	77781	+	15	XUT0089_77767_77781_15	XUT0089	6	TRUE	TRUE	FALSE	FALSE	FALSE	FALSE	FALSE	FALSE	FALSE
chr03	77857	77898	+	42	XUT0089_77857_77898_42	XUT0089	8	TRUE	TRUE	FALSE	FALSE	FALSE	FALSE	FALSE	FALSE	FALSE
chr03	77561	77587	+	27	XUT0089_77561_77587_27	XUT0089	4	TRUE	TRUE	FALSE	FALSE	FALSE	FALSE	FALSE	FALSE	FALSE
chr03	77606	77638	+	33	XUT0089_77606_77638_33	XUT0089	5	TRUE	TRUE	FALSE	FALSE	FALSE	FALSE	FALSE	FALSE	FALSE
chr03	77355	77414	+	60	XUT0089_77355_77414_60	XUT0089	1	TRUE	TRUE	FALSE	FALSE	FALSE	FALSE	FALSE	FALSE	FALSE
chr03	77799	77960	+	162	XUT0089_77799_77960_162	XUT0089	7	TRUE	TRUE	FALSE	FALSE	FALSE	FALSE	FALSE	FALSE	FALSE
chr03	103701	103715	+	15	XUT0092_103701_103715_15	XUT0092	1	FALSE	TRUE	FALSE	FALSE	FALSE	FALSE	FALSE	FALSE	FALSE
chr03	104213	104233	+	21	XUT0093_104213_104233_21	XUT0093	1	FALSE	TRUE	FALSE	FALSE	FALSE	FALSE	FALSE	FALSE	FALSE
chr03	104286	104483	+	198	XUT0093_104286_104483_198	XUT0093	2	FALSE	TRUE	FALSE	FALSE	FALSE	FALSE	FALSE	FALSE	FALSE
chr03	112845	112904	-	60	XUT1011_112845_112904_60	XUT1011	1	TRUE	TRUE	TRUE	FALSE	TRUE	FALSE	TRUE	TRUE	TRUE
chr03	112635	112670	-	36	XUT1011_112635_112670_36	XUT1011	6	TRUE	TRUE	FALSE	FALSE	FALSE	FALSE	FALSE	FALSE	FALSE
chr03	112871	112888	-	18	XUT1011_112871_112888_18	XUT1011	2	TRUE	TRUE	FALSE	FALSE	FALSE	FALSE	FALSE	FALSE	FALSE
chr03	112727	112771	-	45	XUT1011_112727_112771_45	XUT1011	4	TRUE	TRUE	FALSE	FALSE	FALSE	FALSE	FALSE	FALSE	FALSE
chr03	112628	112660	-	33	XUT1011_112628_112660_33	XUT1011	7	TRUE	TRUE	FALSE	FALSE	FALSE	FALSE	FALSE	FALSE	FALSE
chr03	112780	112845	-	66	XUT1011_112780_112845_66	XUT1011	3	TRUE	TRUE	FALSE	FALSE	FALSE	FALSE	FALSE	FALSE	FALSE
chr03	112660	112734	-	75	XUT1011_112660_112734_75	XUT1011	5	TRUE	TRUE	FALSE	FALSE	FALSE	FALSE	FALSE	FALSE	FALSE
chr03	112591	112620	-	30	XUT1011_112591_112620_30	XUT1011	8	TRUE	TRUE	FALSE	FALSE	FALSE	FALSE	FALSE	FALSE	FALSE
chr03	113689	113790	-	102	XUT1012_113689_113790_102	XUT1012	4	TRUE	TRUE	TRUE	FALSE	FALSE	FALSE	FALSE	FALSE	FALSE
chr03	113527	113664	-	138	XUT1012_113527_113664_138	XUT1012	6	TRUE	TRUE	FALSE	FALSE	FALSE	FALSE	FALSE	FALSE	FALSE
chr03	113556	113771	-	216	XUT1012_113556_113771_216	XUT1012	5	TRUE	TRUE	TRUE	FALSE	FALSE	FALSE	FALSE	FALSE	FALSE
chr03	113256	113399	-	144	XUT1012_113256_113399_144	XUT1012	7	TRUE	TRUE	FALSE	FALSE	FALSE	FALSE	FALSE	FALSE	FALSE
chr03	114080	114100	-	21	XUT1012_114080_114100_21	XUT1012	1	TRUE	TRUE	FALSE	FALSE	FALSE	FALSE	FALSE	FALSE	FALSE
chr03	113993	114046	-	54	XUT1012_113993_114046_54	XUT1012	2	TRUE	TRUE	FALSE	FALSE	FALSE	FALSE	FALSE	FALSE	FALSE
chr03	113771	113815	-	45	XUT1012_113771_113815_45	XUT1012	3	TRUE	TRUE	FALSE	FALSE	FALSE	FALSE	FALSE	FALSE	FALSE
chr03	114705	114743	+	39	XUT0094_114705_114743_39	XUT0094	2	TRUE	TRUE	TRUE	FALSE	FALSE	FALSE	TRUE	TRUE	TRUE
chr03	114670	114696	+	27	XUT0094_114670_114696_27	XUT0094	1	TRUE	TRUE	TRUE	FALSE	FALSE	FALSE	TRUE	TRUE	TRUE
chr03	114880	114915	+	36	XUT0094_114880_114915_36	XUT0094	4	TRUE	TRUE	FALSE	FALSE	FALSE	FALSE	FALSE	FALSE	FALSE
chr03	114815	114892	+	78	XUT0094_114815_114892_78	XUT0094	3	TRUE	TRUE	FALSE	FALSE	FALSE	FALSE	FALSE	FALSE	FALSE
chr03	116610	116651	-	42	XUT1013_116610_116651_42	XUT1013	1	TRUE	TRUE	TRUE	FALSE	TRUE	FALSE	FALSE	TRUE	TRUE
chr03	116163	116180	-	18	XUT1013_116163_116180_18	XUT1013	7	TRUE	TRUE	FALSE	FALSE	FALSE	FALSE	FALSE	FALSE	FALSE
chr03	115758	115838	-	81	XUT1013_115758_115838_81	XUT1013	9	TRUE	TRUE	TRUE	FALSE	TRUE	FALSE	FALSE	TRUE	FALSE
chr03	115608	115634	-	27	XUT1013_115608_115634_27	XUT1013	13	TRUE	TRUE	FALSE	FALSE	FALSE	FALSE	FALSE	FALSE	FALSE
chr03	114927	115001	-	75	XUT1013_114927_115001_75	XUT1013	20	TRUE	TRUE	TRUE	FALSE	FALSE	FALSE	FALSE	FALSE	FALSE
chr03	114732	114773	-	42	XUT1013_114732_114773_42	XUT1013	24	TRUE	TRUE	FALSE	FALSE	FALSE	FALSE	FALSE	FALSE	FALSE
chr03	116477	116560	-	84	XUT1013_116477_116560_84	XUT1013	2	TRUE	TRUE	FALSE	FALSE	FALSE	FALSE	FALSE	FALSE	FALSE
chr03	116354	116413	-	60	XUT1013_116354_116413_60	XUT1013	3	TRUE	TRUE	FALSE	FALSE	FALSE	FALSE	FALSE	FALSE	FALSE
chr03	116192	116209	-	18	XUT1013_116192_116209_18	XUT1013	6	TRUE	TRUE	FALSE	FALSE	FALSE	FALSE	FALSE	FALSE	FALSE
chr03	115838	115852	-	15	XUT1013_115838_115852_15	XUT1013	8	TRUE	TRUE	FALSE	FALSE	FALSE	FALSE	FALSE	FALSE	FALSE
chr03	115691	115714	-	24	XUT1013_115691_115714_24	XUT1013	11	TRUE	TRUE	FALSE	FALSE	FALSE	FALSE	FALSE	FALSE	FALSE
chr03	115415	115435	-	21	XUT1013_115415_115435_21	XUT1013	14	TRUE	TRUE	FALSE	FALSE	FALSE	FALSE	FALSE	FALSE	FALSE
chr03	115364	115378	-	15	XUT1013_115364_115378_15	XUT1013	15	TRUE	TRUE	FALSE	FALSE	FALSE	FALSE	FALSE	FALSE	FALSE
chr03	115004	115102	-	99	XUT1013_115004_115102_99	XUT1013	18	TRUE	TRUE	FALSE	FALSE	FALSE	FALSE	FALSE	FALSE	FALSE
chr03	114767	114835	-	69	XUT1013_114767_114835_69	XUT1013	22	TRUE	TRUE	FALSE	FALSE	FALSE	FALSE	FALSE	FALSE	FALSE
chr03	116281	116343	-	63	XUT1013_116281_116343_63	XUT1013	4	TRUE	TRUE	FALSE	FALSE	FALSE	FALSE	FALSE	FALSE	FALSE
chr03	116227	116241	-	15	XUT1013_116227_116241_15	XUT1013	5	TRUE	TRUE	FALSE	FALSE	FALSE	FALSE	FALSE	FALSE	FALSE
chr03	115765	115797	-	33	XUT1013_115765_115797_33	XUT1013	10	TRUE	TRUE	TRUE	FALSE	FALSE	FALSE	FALSE	FALSE	FALSE
chr03	115660	115686	-	27	XUT1013_115660_115686_27	XUT1013	12	TRUE	TRUE	FALSE	FALSE	FALSE	FALSE	FALSE	FALSE	FALSE
chr03	115333	115374	-	42	XUT1013_115333_115374_42	XUT1013	16	TRUE	TRUE	FALSE	FALSE	FALSE	FALSE	FALSE	FALSE	FALSE
chr03	115267	115317	-	51	XUT1013_115267_115317_51	XUT1013	17	TRUE	TRUE	FALSE	FALSE	FALSE	FALSE	FALSE	FALSE	FALSE
chr03	114874	115041	-	168	XUT1013_114874_115041_168	XUT1013	19	TRUE	TRUE	TRUE	FALSE	TRUE	FALSE	TRUE	TRUE	FALSE
chr03	114835	114855	-	21	XUT1013_114835_114855_21	XUT1013	21	TRUE	TRUE	FALSE	FALSE	FALSE	FALSE	FALSE	FALSE	FALSE
chr03	114814	114831	-	18	XUT1013_114814_114831_18	XUT1013	23	TRUE	TRUE	FALSE	FALSE	FALSE	FALSE	FALSE	FALSE	FALSE
chr03	116567	116584	+	18	XUT0095_116567_116584_18	XUT0095	3	TRUE	TRUE	FALSE	FALSE	FALSE	FALSE	FALSE	FALSE	FALSE
chr03	116412	116426	+	15	XUT0095_116412_116426_15	XUT0095	1	TRUE	TRUE	FALSE	FALSE	FALSE	FALSE	FALSE	FALSE	FALSE
chr03	116616	116657	+	42	XUT0095_116616_116657_42	XUT0095	4	TRUE	TRUE	FALSE	FALSE	FALSE	FALSE	FALSE	FALSE	FALSE
chr03	116667	116693	+	27	XUT0095_116667_116693_27	XUT0095	5	TRUE	TRUE	FALSE	FALSE	FALSE	FALSE	FALSE	FALSE	FALSE
chr03	116452	116490	+	39	XUT0095_116452_116490_39	XUT0095	2	TRUE	TRUE	FALSE	FALSE	FALSE	FALSE	FALSE	FALSE	FALSE
chr03	116746	116784	+	39	XUT0095_116746_116784_39	XUT0095	6	TRUE	TRUE	FALSE	FALSE	FALSE	FALSE	FALSE	FALSE	FALSE
chr03	116871	116921	+	51	XUT0096_116871_116921_51	XUT0096	1	TRUE	TRUE	TRUE	FALSE	FALSE	FALSE	FALSE	FALSE	FALSE
chr03	117051	117086	+	36	XUT0096_117051_117086_36	XUT0096	3	TRUE	TRUE	FALSE	FALSE	FALSE	FALSE	FALSE	FALSE	FALSE
chr03	117026	117043	+	18	XUT0096_117026_117043_18	XUT0096	2	TRUE	TRUE	FALSE	FALSE	FALSE	FALSE	FALSE	FALSE	FALSE
chr03	120562	120666	+	105	XUT0097_120562_120666_105	XUT0097	1	FALSE	FALSE	FALSE	FALSE	FALSE	FALSE	FALSE	FALSE	FALSE
chr03	120712	120735	+	24	XUT0097_120712_120735_24	XUT0097	2	FALSE	FALSE	FALSE	FALSE	FALSE	FALSE	FALSE	FALSE	FALSE
chr03	124075	124089	+	15	XUT0098_124075_124089_15	XUT0098	1	TRUE	TRUE	FALSE	FALSE	FALSE	FALSE	FALSE	FALSE	FALSE
chr03	124249	124374	+	126	XUT0098_124249_124374_126	XUT0098	2	TRUE	TRUE	FALSE	FALSE	FALSE	FALSE	FALSE	FALSE	FALSE
chr03	124304	124423	+	120	XUT0098_124304_124423_120	XUT0098	3	TRUE	TRUE	FALSE	FALSE	FALSE	FALSE	FALSE	FALSE	FALSE
chr03	124986	125045	-	60	XUT1014_124986_125045_60	XUT1014	1	TRUE	TRUE	TRUE	FALSE	TRUE	TRUE	TRUE	TRUE	TRUE
chr03	124698	124760	-	63	XUT1014_124698_124760_63	XUT1014	3	TRUE	TRUE	FALSE	FALSE	FALSE	FALSE	FALSE	FALSE	FALSE
chr03	124578	124607	-	30	XUT1014_124578_124607_30	XUT1014	4	TRUE	TRUE	FALSE	FALSE	FALSE	FALSE	FALSE	FALSE	FALSE
chr03	124458	124505	-	48	XUT1014_124458_124505_48	XUT1014	6	TRUE	TRUE	FALSE	FALSE	FALSE	FALSE	FALSE	FALSE	FALSE
chr03	124433	124468	-	36	XUT1014_124433_124468_36	XUT1014	7	TRUE	TRUE	FALSE	FALSE	FALSE	FALSE	FALSE	FALSE	FALSE
chr03	124355	124375	-	21	XUT1014_124355_124375_21	XUT1014	8	TRUE	TRUE	FALSE	FALSE	FALSE	FALSE	FALSE	FALSE	FALSE
chr03	124864	124935	-	72	XUT1014_124864_124935_72	XUT1014	2	TRUE	TRUE	TRUE	TRUE	FALSE	TRUE	TRUE	TRUE	TRUE
chr03	124498	124578	-	81	XUT1014_124498_124578_81	XUT1014	5	TRUE	TRUE	TRUE	FALSE	FALSE	FALSE	FALSE	FALSE	FALSE
chr03	125215	125265	+	51	XUT0099_125215_125265_51	XUT0099	1	TRUE	TRUE	TRUE	FALSE	TRUE	TRUE	TRUE	TRUE	TRUE
chr03	125767	125916	+	150	XUT0099_125767_125916_150	XUT0099	10	TRUE	TRUE	FALSE	FALSE	FALSE	FALSE	FALSE	FALSE	FALSE
chr03	126013	126084	+	72	XUT0099_126013_126084_72	XUT0099	12	TRUE	TRUE	FALSE	FALSE	FALSE	FALSE	FALSE	FALSE	FALSE
chr03	126094	126117	+	24	XUT0099_126094_126117_24	XUT0099	13	TRUE	TRUE	FALSE	FALSE	FALSE	FALSE	FALSE	FALSE	FALSE
chr03	126199	126243	+	45	XUT0099_126199_126243_45	XUT0099	14	TRUE	TRUE	FALSE	FALSE	FALSE	FALSE	FALSE	FALSE	FALSE
chr03	126652	126687	+	36	XUT0099_126652_126687_36	XUT0099	17	TRUE	TRUE	FALSE	FALSE	FALSE	FALSE	FALSE	FALSE	FALSE
chr03	125372	125407	+	36	XUT0099_125372_125407_36	XUT0099	4	TRUE	TRUE	FALSE	FALSE	TRUE	FALSE	TRUE	TRUE	FALSE
chr03	125486	125536	+	51	XUT0099_125486_125536_51	XUT0099	5	TRUE	TRUE	TRUE	FALSE	FALSE	FALSE	FALSE	FALSE	FALSE
chr03	125546	125563	+	18	XUT0099_125546_125563_18	XUT0099	6	TRUE	TRUE	FALSE	FALSE	FALSE	FALSE	FALSE	FALSE	FALSE
chr03	125567	125647	+	81	XUT0099_125567_125647_81	XUT0099	7	TRUE	TRUE	TRUE	FALSE	FALSE	FALSE	TRUE	TRUE	FALSE
chr03	125693	125710	+	18	XUT0099_125693_125710_18	XUT0099	8	TRUE	TRUE	FALSE	FALSE	FALSE	FALSE	FALSE	FALSE	FALSE
chr03	125936	125977	+	42	XUT0099_125936_125977_42	XUT0099	11	TRUE	TRUE	FALSE	FALSE	FALSE	FALSE	FALSE	FALSE	FALSE
chr03	126512	126529	+	18	XUT0099_126512_126529_18	XUT0099	15	TRUE	TRUE	FALSE	FALSE	FALSE	FALSE	FALSE	FALSE	FALSE
chr03	126578	126610	+	33	XUT0099_126578_126610_33	XUT0099	16	TRUE	TRUE	FALSE	FALSE	FALSE	FALSE	FALSE	FALSE	FALSE
chr03	126719	126757	+	39	XUT0099_126719_126757_39	XUT0099	18	TRUE	TRUE	FALSE	FALSE	FALSE	FALSE	FALSE	FALSE	FALSE
chr03	125247	125279	+	33	XUT0099_125247_125279_33	XUT0099	2	TRUE	TRUE	TRUE	FALSE	TRUE	FALSE	FALSE	TRUE	TRUE
chr03	125337	125468	+	132	XUT0099_125337_125468_132	XUT0099	3	TRUE	TRUE	FALSE	FALSE	FALSE	TRUE	FALSE	TRUE	TRUE
chr03	125757	125822	+	66	XUT0099_125757_125822_66	XUT0099	9	TRUE	TRUE	TRUE	FALSE	FALSE	FALSE	FALSE	FALSE	FALSE
chr03	126729	126767	+	39	XUT0099_126729_126767_39	XUT0099	19	TRUE	TRUE	FALSE	FALSE	FALSE	FALSE	FALSE	FALSE	FALSE
chr03	133008	133160	+	153	XUT0101_133008_133160_153	XUT0101	9	TRUE	TRUE	FALSE	FALSE	FALSE	FALSE	FALSE	FALSE	FALSE
chr03	132373	132435	+	63	XUT0101_132373_132435_63	XUT0101	3	TRUE	TRUE	FALSE	FALSE	FALSE	FALSE	FALSE	FALSE	FALSE
chr03	132508	132555	+	48	XUT0101_132508_132555_48	XUT0101	5	TRUE	TRUE	FALSE	FALSE	FALSE	FALSE	FALSE	FALSE	FALSE
chr03	132805	132945	+	141	XUT0101_132805_132945_141	XUT0101	7	TRUE	TRUE	FALSE	FALSE	FALSE	FALSE	FALSE	FALSE	FALSE
chr03	133402	133443	+	42	XUT0101_133402_133443_42	XUT0101	12	TRUE	TRUE	FALSE	FALSE	FALSE	FALSE	FALSE	FALSE	FALSE
chr03	132296	132340	+	45	XUT0101_132296_132340_45	XUT0101	1	TRUE	TRUE	FALSE	FALSE	FALSE	FALSE	FALSE	FALSE	FALSE
chr03	132356	132373	+	18	XUT0101_132356_132373_18	XUT0101	2	TRUE	TRUE	FALSE	FALSE	FALSE	FALSE	FALSE	FALSE	FALSE
chr03	132464	132493	+	30	XUT0101_132464_132493_30	XUT0101	4	TRUE	TRUE	FALSE	FALSE	FALSE	FALSE	FALSE	FALSE	FALSE
chr03	132671	132748	+	78	XUT0101_132671_132748_78	XUT0101	6	TRUE	TRUE	FALSE	FALSE	FALSE	FALSE	FALSE	FALSE	FALSE
chr03	132818	132859	+	42	XUT0101_132818_132859_42	XUT0101	8	TRUE	TRUE	FALSE	FALSE	FALSE	FALSE	FALSE	FALSE	FALSE
chr03	133013	133039	+	27	XUT0101_133013_133039_27	XUT0101	10	TRUE	TRUE	FALSE	FALSE	FALSE	FALSE	FALSE	FALSE	FALSE
chr03	133211	133255	+	45	XUT0101_133211_133255_45	XUT0101	11	TRUE	TRUE	FALSE	FALSE	FALSE	FALSE	FALSE	FALSE	FALSE
chr03	147955	147969	+	15	XUT0102_147955_147969_15	XUT0102	1	TRUE	TRUE	FALSE	FALSE	FALSE	FALSE	FALSE	FALSE	FALSE
chr03	148105	148122	+	18	XUT0102_148105_148122_18	XUT0102	2	TRUE	TRUE	FALSE	FALSE	FALSE	FALSE	FALSE	FALSE	FALSE
chr03	148240	148395	+	156	XUT0102_148240_148395_156	XUT0102	3	TRUE	TRUE	FALSE	FALSE	FALSE	FALSE	FALSE	FALSE	FALSE
chr03	148523	148600	+	78	XUT0102_148523_148600_78	XUT0102	4	TRUE	TRUE	FALSE	FALSE	FALSE	FALSE	FALSE	FALSE	FALSE
chr03	152152	152172	+	21	XUT0103_152152_152172_21	XUT0103	3	TRUE	TRUE	FALSE	FALSE	FALSE	FALSE	FALSE	FALSE	FALSE
chr03	152203	152220	+	18	XUT0103_152203_152220_18	XUT0103	4	TRUE	TRUE	FALSE	FALSE	FALSE	FALSE	FALSE	FALSE	FALSE
chr03	152314	152349	+	36	XUT0103_152314_152349_36	XUT0103	6	TRUE	TRUE	FALSE	FALSE	FALSE	FALSE	FALSE	FALSE	FALSE
chr03	152129	152149	+	21	XUT0103_152129_152149_21	XUT0103	2	TRUE	TRUE	FALSE	FALSE	FALSE	FALSE	FALSE	FALSE	FALSE
chr03	152240	152314	+	75	XUT0103_152240_152314_75	XUT0103	5	TRUE	TRUE	FALSE	FALSE	FALSE	FALSE	FALSE	FALSE	FALSE
chr03	152049	152120	+	72	XUT0103_152049_152120_72	XUT0103	1	TRUE	TRUE	FALSE	FALSE	FALSE	FALSE	FALSE	FALSE	FALSE
chr03	152408	152524	-	117	XUT1015_152408_152524_117	XUT1015	2	FALSE	TRUE	FALSE	FALSE	FALSE	FALSE	TRUE	TRUE	TRUE
chr03	152514	152573	-	60	XUT1015_152514_152573_60	XUT1015	1	FALSE	TRUE	TRUE	FALSE	FALSE	FALSE	TRUE	TRUE	TRUE
chr03	152358	152414	-	57	XUT1015_152358_152414_57	XUT1015	3	FALSE	TRUE	FALSE	FALSE	FALSE	FALSE	FALSE	FALSE	FALSE
chr03	156318	156362	+	45	XUT0104_156318_156362_45	XUT0104	1	TRUE	TRUE	TRUE	FALSE	FALSE	FALSE	FALSE	FALSE	FALSE
chr03	156579	156680	+	102	XUT0104_156579_156680_102	XUT0104	4	TRUE	TRUE	FALSE	FALSE	FALSE	FALSE	FALSE	FALSE	FALSE
chr03	156717	156764	+	48	XUT0104_156717_156764_48	XUT0104	7	TRUE	TRUE	FALSE	FALSE	FALSE	FALSE	FALSE	FALSE	FALSE
chr03	156894	156914	+	21	XUT0104_156894_156914_21	XUT0104	8	TRUE	TRUE	FALSE	FALSE	FALSE	FALSE	FALSE	FALSE	FALSE
chr03	156640	156693	+	54	XUT0104_156640_156693_54	XUT0104	5	TRUE	TRUE	FALSE	FALSE	FALSE	FALSE	FALSE	FALSE	FALSE
chr03	157045	157062	+	18	XUT0104_157045_157062_18	XUT0104	10	TRUE	TRUE	FALSE	FALSE	FALSE	FALSE	FALSE	FALSE	FALSE
chr03	156326	156355	+	30	XUT0104_156326_156355_30	XUT0104	2	TRUE	TRUE	TRUE	FALSE	FALSE	FALSE	FALSE	FALSE	FALSE
chr03	156440	156493	+	54	XUT0104_156440_156493_54	XUT0104	3	TRUE	TRUE	TRUE	FALSE	TRUE	TRUE	TRUE	TRUE	TRUE
chr03	156662	156751	+	90	XUT0104_156662_156751_90	XUT0104	6	TRUE	TRUE	FALSE	FALSE	FALSE	FALSE	FALSE	FALSE	FALSE
chr03	156944	156961	+	18	XUT0104_156944_156961_18	XUT0104	9	TRUE	TRUE	FALSE	FALSE	FALSE	FALSE	FALSE	FALSE	FALSE
chr03	157803	157958	+	156	XUT0105_157803_157958_156	XUT0105	1	TRUE	TRUE	FALSE	FALSE	FALSE	FALSE	TRUE	TRUE	TRUE
chr03	158145	158189	+	45	XUT0105_158145_158189_45	XUT0105	4	TRUE	TRUE	TRUE	FALSE	FALSE	FALSE	FALSE	FALSE	FALSE
chr03	158262	158330	+	69	XUT0105_158262_158330_69	XUT0105	5	TRUE	TRUE	TRUE	FALSE	FALSE	FALSE	FALSE	FALSE	FALSE
chr03	157816	157839	+	24	XUT0105_157816_157839_24	XUT0105	2	TRUE	TRUE	FALSE	FALSE	TRUE	FALSE	TRUE	TRUE	TRUE
chr03	158068	158196	+	129	XUT0105_158068_158196_129	XUT0105	3	TRUE	TRUE	FALSE	FALSE	TRUE	TRUE	FALSE	TRUE	TRUE
chr03	158281	158322	+	42	XUT0105_158281_158322_42	XUT0105	6	TRUE	TRUE	FALSE	FALSE	FALSE	FALSE	FALSE	FALSE	FALSE
chr03	158389	158415	+	27	XUT0105_158389_158415_27	XUT0105	7	TRUE	TRUE	FALSE	FALSE	FALSE	FALSE	FALSE	FALSE	FALSE
chr03	158646	158720	+	75	XUT0106_158646_158720_75	XUT0106	1	TRUE	TRUE	TRUE	FALSE	TRUE	FALSE	TRUE	TRUE	TRUE
chr03	158797	158871	+	75	XUT0106_158797_158871_75	XUT0106	2	TRUE	TRUE	TRUE	FALSE	FALSE	FALSE	TRUE	TRUE	FALSE
chr03	159076	159153	+	78	XUT0106_159076_159153_78	XUT0106	4	TRUE	TRUE	FALSE	FALSE	FALSE	FALSE	FALSE	FALSE	FALSE
chr03	158915	158929	+	15	XUT0106_158915_158929_15	XUT0106	3	TRUE	TRUE	FALSE	FALSE	FALSE	FALSE	FALSE	FALSE	FALSE
chr03	160693	160707	+	15	XUT0107_160693_160707_15	XUT0107	2	TRUE	TRUE	FALSE	FALSE	FALSE	FALSE	FALSE	FALSE	FALSE
chr03	161131	161178	+	48	XUT0107_161131_161178_48	XUT0107	7	TRUE	TRUE	FALSE	FALSE	FALSE	FALSE	FALSE	FALSE	FALSE
chr03	160736	160774	+	39	XUT0107_160736_160774_39	XUT0107	3	TRUE	TRUE	FALSE	FALSE	FALSE	FALSE	FALSE	FALSE	FALSE
chr03	160784	160951	+	168	XUT0107_160784_160951_168	XUT0107	5	TRUE	TRUE	FALSE	FALSE	FALSE	FALSE	FALSE	FALSE	FALSE
chr03	161387	161569	+	183	XUT0107_161387_161569_183	XUT0107	9	TRUE	TRUE	FALSE	FALSE	FALSE	FALSE	FALSE	FALSE	FALSE
chr03	161729	161776	+	48	XUT0107_161729_161776_48	XUT0107	11	TRUE	TRUE	FALSE	FALSE	FALSE	FALSE	FALSE	FALSE	FALSE
chr03	160656	160679	+	24	XUT0107_160656_160679_24	XUT0107	1	TRUE	TRUE	FALSE	FALSE	FALSE	FALSE	FALSE	FALSE	FALSE
chr03	160767	160823	+	57	XUT0107_160767_160823_57	XUT0107	4	TRUE	TRUE	FALSE	FALSE	FALSE	FALSE	FALSE	FALSE	FALSE
chr03	161058	161084	+	27	XUT0107_161058_161084_27	XUT0107	6	TRUE	TRUE	FALSE	FALSE	FALSE	FALSE	FALSE	FALSE	FALSE
chr03	161313	161336	+	24	XUT0107_161313_161336_24	XUT0107	8	TRUE	TRUE	FALSE	FALSE	FALSE	FALSE	FALSE	FALSE	FALSE
chr03	161613	161702	+	90	XUT0107_161613_161702_90	XUT0107	10	TRUE	TRUE	FALSE	FALSE	FALSE	FALSE	FALSE	FALSE	FALSE
chr03	163274	163294	+	21	XUT0108_163274_163294_21	XUT0108	1	TRUE	TRUE	FALSE	FALSE	FALSE	FALSE	FALSE	FALSE	FALSE
chr03	163406	163453	+	48	XUT0108_163406_163453_48	XUT0108	2	TRUE	TRUE	FALSE	FALSE	FALSE	FALSE	FALSE	FALSE	FALSE
chr03	163682	163825	+	144	XUT0108_163682_163825_144	XUT0108	6	TRUE	TRUE	FALSE	FALSE	FALSE	FALSE	FALSE	FALSE	FALSE
chr03	163832	163855	+	24	XUT0108_163832_163855_24	XUT0108	8	TRUE	TRUE	FALSE	FALSE	FALSE	FALSE	FALSE	FALSE	FALSE
chr03	163542	163556	+	15	XUT0108_163542_163556_15	XUT0108	3	TRUE	TRUE	FALSE	FALSE	FALSE	FALSE	FALSE	FALSE	FALSE
chr03	163614	163628	+	15	XUT0108_163614_163628_15	XUT0108	4	TRUE	TRUE	FALSE	FALSE	FALSE	FALSE	FALSE	FALSE	FALSE
chr03	163677	163700	+	24	XUT0108_163677_163700_24	XUT0108	5	TRUE	TRUE	FALSE	FALSE	FALSE	FALSE	FALSE	FALSE	FALSE
chr03	163791	163808	+	18	XUT0108_163791_163808_18	XUT0108	7	TRUE	TRUE	FALSE	FALSE	FALSE	FALSE	FALSE	FALSE	FALSE
chr03	169190	169282	+	93	XUT0109_169190_169282_93	XUT0109	2	FALSE	FALSE	TRUE	FALSE	FALSE	FALSE	FALSE	FALSE	FALSE
chr03	169361	169375	+	15	XUT0109_169361_169375_15	XUT0109	5	FALSE	FALSE	FALSE	FALSE	FALSE	FALSE	FALSE	FALSE	FALSE
chr03	169314	169349	+	36	XUT0109_169314_169349_36	XUT0109	4	FALSE	FALSE	FALSE	FALSE	FALSE	FALSE	FALSE	FALSE	FALSE
chr03	169162	169194	+	33	XUT0109_169162_169194_33	XUT0109	1	FALSE	FALSE	FALSE	TRUE	FALSE	TRUE	FALSE	TRUE	TRUE
chr03	169297	169317	+	21	XUT0109_169297_169317_21	XUT0109	3	FALSE	FALSE	FALSE	FALSE	FALSE	FALSE	FALSE	FALSE	FALSE
chr03	174331	174513	+	183	XUT0110_174331_174513_183	XUT0110	4	TRUE	TRUE	FALSE	FALSE	FALSE	FALSE	FALSE	FALSE	FALSE
chr03	174835	174900	+	66	XUT0110_174835_174900_66	XUT0110	7	TRUE	TRUE	FALSE	FALSE	FALSE	FALSE	FALSE	FALSE	FALSE
chr03	173897	173932	+	36	XUT0110_173897_173932_36	XUT0110	1	TRUE	TRUE	FALSE	FALSE	FALSE	FALSE	FALSE	FALSE	FALSE
chr03	174617	174709	+	93	XUT0110_174617_174709_93	XUT0110	5	TRUE	TRUE	FALSE	FALSE	FALSE	FALSE	FALSE	FALSE	FALSE
chr03	174971	175111	+	141	XUT0110_174971_175111_141	XUT0110	8	TRUE	TRUE	FALSE	FALSE	FALSE	FALSE	FALSE	FALSE	FALSE
chr03	175232	175267	+	36	XUT0110_175232_175267_36	XUT0110	10	TRUE	TRUE	FALSE	FALSE	FALSE	FALSE	FALSE	FALSE	FALSE
chr03	174021	174053	+	33	XUT0110_174021_174053_33	XUT0110	2	TRUE	TRUE	FALSE	FALSE	FALSE	FALSE	FALSE	FALSE	FALSE
chr03	174300	174350	+	51	XUT0110_174300_174350_51	XUT0110	3	TRUE	TRUE	FALSE	FALSE	FALSE	FALSE	FALSE	FALSE	FALSE
chr03	174831	174851	+	21	XUT0110_174831_174851_21	XUT0110	6	TRUE	TRUE	FALSE	FALSE	FALSE	FALSE	FALSE	FALSE	FALSE
chr03	175173	175223	+	51	XUT0110_175173_175223_51	XUT0110	9	TRUE	TRUE	FALSE	FALSE	FALSE	FALSE	FALSE	FALSE	FALSE
chr03	202880	202894	+	15	XUT0111_202880_202894_15	XUT0111	3	TRUE	TRUE	FALSE	FALSE	FALSE	FALSE	FALSE	FALSE	FALSE
chr03	203444	203479	+	36	XUT0111_203444_203479_36	XUT0111	7	TRUE	TRUE	FALSE	FALSE	FALSE	FALSE	FALSE	FALSE	FALSE
chr03	203843	203857	+	15	XUT0111_203843_203857_15	XUT0111	9	TRUE	TRUE	FALSE	FALSE	FALSE	FALSE	FALSE	FALSE	FALSE
chr03	203921	203941	+	21	XUT0111_203921_203941_21	XUT0111	11	TRUE	TRUE	FALSE	FALSE	FALSE	FALSE	FALSE	FALSE	FALSE
chr03	204725	204817	+	93	XUT0111_204725_204817_93	XUT0111	16	TRUE	TRUE	FALSE	FALSE	FALSE	FALSE	FALSE	FALSE	FALSE
chr03	204938	204964	+	27	XUT0111_204938_204964_27	XUT0111	17	TRUE	TRUE	FALSE	FALSE	FALSE	FALSE	FALSE	FALSE	FALSE
chr03	203133	203219	+	87	XUT0111_203133_203219_87	XUT0111	4	TRUE	TRUE	FALSE	FALSE	FALSE	FALSE	FALSE	FALSE	FALSE
chr03	203430	203444	+	15	XUT0111_203430_203444_15	XUT0111	6	TRUE	TRUE	FALSE	FALSE	FALSE	FALSE	FALSE	FALSE	FALSE
chr03	203937	203957	+	21	XUT0111_203937_203957_21	XUT0111	12	TRUE	TRUE	FALSE	FALSE	FALSE	FALSE	FALSE	FALSE	FALSE
chr03	204264	204344	+	81	XUT0111_204264_204344_81	XUT0111	14	TRUE	TRUE	FALSE	FALSE	FALSE	FALSE	FALSE	FALSE	FALSE
chr03	205134	205214	+	81	XUT0111_205134_205214_81	XUT0111	19	TRUE	TRUE	FALSE	FALSE	FALSE	FALSE	FALSE	FALSE	FALSE
chr03	205302	205532	+	231	XUT0111_205302_205532_231	XUT0111	21	TRUE	TRUE	FALSE	FALSE	FALSE	FALSE	FALSE	FALSE	FALSE
chr03	202756	202797	+	42	XUT0111_202756_202797_42	XUT0111	1	TRUE	TRUE	FALSE	FALSE	FALSE	FALSE	FALSE	FALSE	FALSE
chr03	202828	203091	+	264	XUT0111_202828_203091_264	XUT0111	2	TRUE	TRUE	TRUE	FALSE	FALSE	TRUE	FALSE	TRUE	TRUE
chr03	203356	203433	+	78	XUT0111_203356_203433_78	XUT0111	5	TRUE	TRUE	FALSE	FALSE	FALSE	FALSE	FALSE	FALSE	FALSE
chr03	203557	203703	+	147	XUT0111_203557_203703_147	XUT0111	8	TRUE	TRUE	FALSE	FALSE	FALSE	FALSE	FALSE	FALSE	FALSE
chr03	203914	203973	+	60	XUT0111_203914_203973_60	XUT0111	10	TRUE	TRUE	FALSE	FALSE	FALSE	FALSE	FALSE	FALSE	FALSE
chr03	204097	204261	+	165	XUT0111_204097_204261_165	XUT0111	13	TRUE	TRUE	TRUE	FALSE	FALSE	FALSE	FALSE	FALSE	FALSE
chr03	204295	204771	+	477	XUT0111_204295_204771_477	XUT0111	15	TRUE	TRUE	FALSE	FALSE	FALSE	TRUE	FALSE	TRUE	FALSE
chr03	204967	205119	+	153	XUT0111_204967_205119_153	XUT0111	18	TRUE	TRUE	FALSE	FALSE	FALSE	FALSE	FALSE	FALSE	FALSE
chr03	205234	205266	+	33	XUT0111_205234_205266_33	XUT0111	20	TRUE	TRUE	FALSE	FALSE	FALSE	FALSE	FALSE	FALSE	FALSE
chr03	205360	205482	+	123	XUT0111_205360_205482_123	XUT0111	22	TRUE	TRUE	TRUE	FALSE	FALSE	FALSE	FALSE	FALSE	FALSE
chr03	210656	210676	+	21	XUT0112_210656_210676_21	XUT0112	1	FALSE	TRUE	FALSE	FALSE	FALSE	FALSE	FALSE	FALSE	FALSE
chr03	214101	214301	-	201	XUT1017_214101_214301_201	XUT1017	4	TRUE	TRUE	TRUE	FALSE	FALSE	FALSE	FALSE	FALSE	FALSE
chr03	214466	214696	-	231	XUT1017_214466_214696_231	XUT1017	1	TRUE	TRUE	FALSE	FALSE	FALSE	FALSE	FALSE	FALSE	FALSE
chr03	214184	214435	-	252	XUT1017_214184_214435_252	XUT1017	2	TRUE	TRUE	TRUE	FALSE	FALSE	FALSE	FALSE	FALSE	FALSE
chr03	214052	214174	-	123	XUT1017_214052_214174_123	XUT1017	6	TRUE	TRUE	FALSE	FALSE	FALSE	FALSE	FALSE	FALSE	FALSE
chr03	214363	214386	-	24	XUT1017_214363_214386_24	XUT1017	3	TRUE	TRUE	FALSE	FALSE	FALSE	FALSE	FALSE	FALSE	FALSE
chr03	214177	214209	-	33	XUT1017_214177_214209_33	XUT1017	5	TRUE	TRUE	FALSE	FALSE	FALSE	FALSE	FALSE	FALSE	FALSE
chr03	223694	223729	+	36	XUT0113_223694_223729_36	XUT0113	4	FALSE	FALSE	FALSE	FALSE	FALSE	FALSE	FALSE	FALSE	FALSE
chr03	223769	223930	+	162	XUT0113_223769_223930_162	XUT0113	5	FALSE	FALSE	FALSE	FALSE	FALSE	FALSE	FALSE	FALSE	FALSE
chr03	223982	224230	+	249	XUT0113_223982_224230_249	XUT0113	6	FALSE	FALSE	FALSE	FALSE	FALSE	FALSE	FALSE	FALSE	FALSE
chr03	223527	223643	+	117	XUT0113_223527_223643_117	XUT0113	1	FALSE	FALSE	TRUE	FALSE	FALSE	FALSE	FALSE	FALSE	FALSE
chr03	223689	223985	+	297	XUT0113_223689_223985_297	XUT0113	3	FALSE	FALSE	FALSE	FALSE	FALSE	FALSE	FALSE	FALSE	FALSE
chr03	224046	224072	+	27	XUT0113_224046_224072_27	XUT0113	7	FALSE	FALSE	FALSE	FALSE	FALSE	FALSE	FALSE	FALSE	FALSE
chr03	224103	224174	+	72	XUT0113_224103_224174_72	XUT0113	8	FALSE	FALSE	FALSE	FALSE	FALSE	FALSE	FALSE	FALSE	FALSE
chr03	224178	224216	+	39	XUT0113_224178_224216_39	XUT0113	9	FALSE	FALSE	FALSE	FALSE	FALSE	FALSE	FALSE	FALSE	FALSE
chr03	223648	223671	+	24	XUT0113_223648_223671_24	XUT0113	2	FALSE	FALSE	FALSE	FALSE	FALSE	FALSE	FALSE	FALSE	FALSE
chr03	224500	224535	-	36	XUT1018_224500_224535_36	XUT1018	1	FALSE	TRUE	FALSE	FALSE	FALSE	FALSE	FALSE	FALSE	FALSE
chr03	225913	225984	-	72	XUT1019_225913_225984_72	XUT1019	2	TRUE	TRUE	FALSE	FALSE	FALSE	FALSE	FALSE	FALSE	FALSE
chr03	225427	225669	-	243	XUT1019_225427_225669_243	XUT1019	6	TRUE	TRUE	FALSE	FALSE	FALSE	FALSE	FALSE	FALSE	FALSE
chr03	225259	225273	-	15	XUT1019_225259_225273_15	XUT1019	9	TRUE	TRUE	FALSE	FALSE	FALSE	FALSE	FALSE	FALSE	FALSE
chr03	225112	225156	-	45	XUT1019_225112_225156_45	XUT1019	11	TRUE	TRUE	FALSE	FALSE	FALSE	FALSE	FALSE	FALSE	FALSE
chr03	225975	226007	-	33	XUT1019_225975_226007_33	XUT1019	1	TRUE	TRUE	FALSE	FALSE	FALSE	FALSE	FALSE	FALSE	FALSE
chr03	225885	225902	-	18	XUT1019_225885_225902_18	XUT1019	3	TRUE	TRUE	FALSE	FALSE	FALSE	FALSE	FALSE	FALSE	FALSE
chr03	225618	225710	-	93	XUT1019_225618_225710_93	XUT1019	5	TRUE	TRUE	FALSE	FALSE	FALSE	FALSE	FALSE	FALSE	FALSE
chr03	225722	225757	-	36	XUT1019_225722_225757_36	XUT1019	4	TRUE	TRUE	FALSE	FALSE	FALSE	FALSE	FALSE	FALSE	FALSE
chr03	225593	225625	-	33	XUT1019_225593_225625_33	XUT1019	7	TRUE	TRUE	FALSE	FALSE	FALSE	FALSE	FALSE	FALSE	FALSE
chr03	225506	225520	-	15	XUT1019_225506_225520_15	XUT1019	8	TRUE	TRUE	FALSE	FALSE	FALSE	FALSE	FALSE	FALSE	FALSE
chr03	225179	225196	-	18	XUT1019_225179_225196_18	XUT1019	10	TRUE	TRUE	FALSE	FALSE	FALSE	FALSE	FALSE	FALSE	FALSE
chr03	225074	225106	-	33	XUT1019_225074_225106_33	XUT1019	12	TRUE	TRUE	FALSE	FALSE	FALSE	FALSE	FALSE	FALSE	FALSE
chr03	225020	225061	-	42	XUT1019_225020_225061_42	XUT1019	13	TRUE	TRUE	FALSE	FALSE	FALSE	FALSE	FALSE	FALSE	FALSE
chr03	224888	224965	-	78	XUT1019_224888_224965_78	XUT1019	14	TRUE	TRUE	FALSE	FALSE	FALSE	FALSE	FALSE	FALSE	FALSE
chr03	236864	236953	+	90	XUT0114_236864_236953_90	XUT0114	1	FALSE	FALSE	TRUE	FALSE	TRUE	FALSE	FALSE	TRUE	TRUE
chr03	237020	237049	+	30	XUT0114_237020_237049_30	XUT0114	2	FALSE	FALSE	FALSE	FALSE	FALSE	FALSE	FALSE	FALSE	FALSE
chr03	242632	242685	+	54	XUT0115_242632_242685_54	XUT0115	1	TRUE	TRUE	TRUE	FALSE	FALSE	FALSE	TRUE	TRUE	TRUE
chr03	242872	242904	+	33	XUT0115_242872_242904_33	XUT0115	3	TRUE	TRUE	FALSE	FALSE	FALSE	FALSE	FALSE	FALSE	FALSE
chr03	243142	243249	+	108	XUT0115_243142_243249_108	XUT0115	6	TRUE	TRUE	FALSE	FALSE	FALSE	FALSE	FALSE	FALSE	FALSE
chr03	243451	243465	+	15	XUT0115_243451_243465_15	XUT0115	9	TRUE	TRUE	FALSE	FALSE	FALSE	FALSE	FALSE	FALSE	FALSE
chr03	243505	243546	+	42	XUT0115_243505_243546_42	XUT0115	11	TRUE	TRUE	FALSE	FALSE	FALSE	FALSE	FALSE	FALSE	FALSE
chr03	243757	243831	+	75	XUT0115_243757_243831_75	XUT0115	13	TRUE	TRUE	FALSE	FALSE	FALSE	FALSE	FALSE	FALSE	FALSE
chr03	244189	244215	+	27	XUT0115_244189_244215_27	XUT0115	16	TRUE	TRUE	FALSE	FALSE	FALSE	FALSE	FALSE	FALSE	FALSE
chr03	243116	243154	+	39	XUT0115_243116_243154_39	XUT0115	5	TRUE	TRUE	FALSE	FALSE	FALSE	FALSE	FALSE	FALSE	FALSE
chr03	243272	243313	+	42	XUT0115_243272_243313_42	XUT0115	8	TRUE	TRUE	FALSE	FALSE	FALSE	FALSE	FALSE	FALSE	FALSE
chr03	242799	242993	+	195	XUT0115_242799_242993_195	XUT0115	2	TRUE	TRUE	TRUE	FALSE	FALSE	TRUE	FALSE	TRUE	TRUE
chr03	243069	243206	+	138	XUT0115_243069_243206_138	XUT0115	4	TRUE	TRUE	FALSE	FALSE	FALSE	FALSE	FALSE	FALSE	FALSE
chr03	243249	243287	+	39	XUT0115_243249_243287_39	XUT0115	7	TRUE	TRUE	FALSE	FALSE	FALSE	FALSE	FALSE	FALSE	FALSE
chr03	243465	243539	+	75	XUT0115_243465_243539_75	XUT0115	10	TRUE	TRUE	TRUE	FALSE	FALSE	FALSE	FALSE	FALSE	FALSE
chr03	243699	243791	+	93	XUT0115_243699_243791_93	XUT0115	12	TRUE	TRUE	FALSE	FALSE	FALSE	FALSE	FALSE	FALSE	FALSE
chr03	243954	244091	+	138	XUT0115_243954_244091_138	XUT0115	14	TRUE	TRUE	TRUE	FALSE	FALSE	FALSE	FALSE	FALSE	FALSE
chr03	244185	244211	+	27	XUT0115_244185_244211_27	XUT0115	15	TRUE	TRUE	FALSE	FALSE	FALSE	FALSE	FALSE	FALSE	FALSE
chr03	245445	245471	+	27	XUT0116_245445_245471_27	XUT0116	1	TRUE	TRUE	FALSE	FALSE	FALSE	FALSE	FALSE	FALSE	FALSE
chr03	245989	246045	+	57	XUT0117_245989_246045_57	XUT0117	1	TRUE	TRUE	FALSE	FALSE	FALSE	FALSE	FALSE	FALSE	FALSE
chr03	253631	253834	-	204	XUT1020_253631_253834_204	XUT1020	2	FALSE	TRUE	FALSE	FALSE	FALSE	FALSE	FALSE	FALSE	FALSE
chr03	253642	253947	-	306	XUT1020_253642_253947_306	XUT1020	1	FALSE	TRUE	FALSE	FALSE	FALSE	FALSE	FALSE	FALSE	FALSE
chr03	253399	253596	-	198	XUT1020_253399_253596_198	XUT1020	4	FALSE	TRUE	FALSE	FALSE	FALSE	FALSE	FALSE	FALSE	FALSE
chr03	253596	253628	-	33	XUT1020_253596_253628_33	XUT1020	3	FALSE	TRUE	FALSE	FALSE	FALSE	FALSE	FALSE	FALSE	FALSE
chr03	263134	263166	-	33	XUT1021_263134_263166_33	XUT1021	1	TRUE	FALSE	FALSE	FALSE	FALSE	FALSE	FALSE	FALSE	FALSE
chr03	273120	273143	+	24	XUT0118_273120_273143_24	XUT0118	1	TRUE	TRUE	FALSE	FALSE	FALSE	FALSE	FALSE	FALSE	FALSE
chr03	273537	273566	+	30	XUT0118_273537_273566_30	XUT0118	4	TRUE	TRUE	FALSE	FALSE	FALSE	FALSE	FALSE	FALSE	FALSE
chr03	273969	274025	+	57	XUT0118_273969_274025_57	XUT0118	6	TRUE	TRUE	FALSE	FALSE	FALSE	FALSE	FALSE	FALSE	FALSE
chr03	273916	273963	+	48	XUT0118_273916_273963_48	XUT0118	5	TRUE	TRUE	FALSE	FALSE	FALSE	FALSE	FALSE	FALSE	FALSE
chr03	274057	274077	+	21	XUT0118_274057_274077_21	XUT0118	7	TRUE	TRUE	FALSE	FALSE	FALSE	FALSE	FALSE	FALSE	FALSE
chr03	274099	274269	+	171	XUT0118_274099_274269_171	XUT0118	9	TRUE	TRUE	FALSE	FALSE	FALSE	FALSE	FALSE	FALSE	FALSE
chr03	273299	273352	+	54	XUT0118_273299_273352_54	XUT0118	2	TRUE	TRUE	FALSE	FALSE	FALSE	FALSE	FALSE	FALSE	FALSE
chr03	273476	273574	+	99	XUT0118_273476_273574_99	XUT0118	3	TRUE	TRUE	TRUE	FALSE	FALSE	FALSE	FALSE	FALSE	FALSE
chr03	274061	274144	+	84	XUT0118_274061_274144_84	XUT0118	8	TRUE	TRUE	FALSE	FALSE	FALSE	FALSE	FALSE	FALSE	FALSE
chr03	295636	295791	+	156	XUT0119_295636_295791_156	XUT0119	2	FALSE	TRUE	FALSE	FALSE	FALSE	FALSE	FALSE	FALSE	FALSE
chr03	295733	295762	+	30	XUT0119_295733_295762_30	XUT0119	3	FALSE	TRUE	FALSE	FALSE	FALSE	FALSE	FALSE	FALSE	FALSE
chr03	295626	295652	+	27	XUT0119_295626_295652_27	XUT0119	1	FALSE	TRUE	FALSE	FALSE	FALSE	FALSE	FALSE	FALSE	FALSE
chr03	298793	298816	+	24	XUT0120_298793_298816_24	XUT0120	2	TRUE	TRUE	FALSE	FALSE	FALSE	FALSE	FALSE	FALSE	FALSE
chr03	298862	298927	+	66	XUT0120_298862_298927_66	XUT0120	3	TRUE	TRUE	FALSE	FALSE	FALSE	FALSE	FALSE	FALSE	FALSE
chr03	298955	299224	+	270	XUT0120_298955_299224_270	XUT0120	5	TRUE	TRUE	FALSE	FALSE	FALSE	FALSE	FALSE	FALSE	FALSE
chr03	299333	299365	+	33	XUT0120_299333_299365_33	XUT0120	10	TRUE	TRUE	FALSE	FALSE	FALSE	FALSE	FALSE	FALSE	FALSE
chr03	299393	299563	+	171	XUT0120_299393_299563_171	XUT0120	11	TRUE	TRUE	FALSE	FALSE	FALSE	FALSE	FALSE	FALSE	FALSE
chr03	298779	298811	+	33	XUT0120_298779_298811_33	XUT0120	1	TRUE	TRUE	FALSE	FALSE	FALSE	FALSE	FALSE	FALSE	FALSE
chr03	298971	299090	+	120	XUT0120_298971_299090_120	XUT0120	6	TRUE	TRUE	FALSE	FALSE	FALSE	FALSE	FALSE	FALSE	FALSE
chr03	299115	299138	+	24	XUT0120_299115_299138_24	XUT0120	7	TRUE	TRUE	FALSE	FALSE	FALSE	FALSE	FALSE	FALSE	FALSE
chr03	299325	299357	+	33	XUT0120_299325_299357_33	XUT0120	9	TRUE	TRUE	FALSE	FALSE	FALSE	FALSE	FALSE	FALSE	FALSE
chr03	298897	299001	+	105	XUT0120_298897_299001_105	XUT0120	4	TRUE	TRUE	FALSE	FALSE	FALSE	FALSE	FALSE	FALSE	FALSE
chr03	299209	299259	+	51	XUT0120_299209_299259_51	XUT0120	8	TRUE	TRUE	FALSE	FALSE	FALSE	FALSE	FALSE	FALSE	FALSE
chr03	299835	299855	+	21	XUT0121_299835_299855_21	XUT0121	3	FALSE	TRUE	FALSE	FALSE	FALSE	FALSE	FALSE	FALSE	FALSE
chr03	299934	299972	+	39	XUT0121_299934_299972_39	XUT0121	4	FALSE	TRUE	FALSE	FALSE	FALSE	FALSE	FALSE	FALSE	FALSE
chr03	299991	300038	+	48	XUT0121_299991_300038_48	XUT0121	6	FALSE	TRUE	FALSE	FALSE	FALSE	FALSE	FALSE	FALSE	FALSE
chr03	300057	300113	+	57	XUT0121_300057_300113_57	XUT0121	7	FALSE	TRUE	FALSE	FALSE	FALSE	FALSE	FALSE	FALSE	FALSE
chr03	300147	300242	+	96	XUT0121_300147_300242_96	XUT0121	9	FALSE	TRUE	FALSE	FALSE	FALSE	FALSE	FALSE	FALSE	FALSE
chr03	300285	300368	+	84	XUT0121_300285_300368_84	XUT0121	10	FALSE	TRUE	FALSE	FALSE	FALSE	FALSE	FALSE	FALSE	FALSE
chr03	299779	299835	+	57	XUT0121_299779_299835_57	XUT0121	2	FALSE	TRUE	FALSE	FALSE	FALSE	FALSE	FALSE	FALSE	FALSE
chr03	300088	300153	+	66	XUT0121_300088_300153_66	XUT0121	8	FALSE	TRUE	FALSE	FALSE	FALSE	FALSE	FALSE	FALSE	FALSE
chr03	300349	300393	+	45	XUT0121_300349_300393_45	XUT0121	11	FALSE	TRUE	FALSE	FALSE	FALSE	FALSE	FALSE	FALSE	FALSE
chr03	299711	299734	+	24	XUT0121_299711_299734_24	XUT0121	1	FALSE	TRUE	FALSE	FALSE	FALSE	FALSE	FALSE	FALSE	FALSE
chr03	299975	300001	+	27	XUT0121_299975_300001_27	XUT0121	5	FALSE	TRUE	FALSE	FALSE	FALSE	FALSE	FALSE	FALSE	FALSE
chr03	300368	300541	+	174	XUT0121_300368_300541_174	XUT0121	12	FALSE	TRUE	FALSE	FALSE	FALSE	FALSE	FALSE	FALSE	FALSE
chr03	300554	300577	+	24	XUT0121_300554_300577_24	XUT0121	13	FALSE	TRUE	FALSE	FALSE	FALSE	FALSE	FALSE	FALSE	FALSE
chr03	303429	303449	+	21	XUT0122_303429_303449_21	XUT0122	4	TRUE	TRUE	FALSE	FALSE	FALSE	FALSE	FALSE	FALSE	FALSE
chr03	303459	303488	+	30	XUT0122_303459_303488_30	XUT0122	5	TRUE	TRUE	FALSE	FALSE	FALSE	FALSE	FALSE	FALSE	FALSE
chr03	303840	303860	+	21	XUT0122_303840_303860_21	XUT0122	10	TRUE	TRUE	FALSE	FALSE	FALSE	FALSE	FALSE	FALSE	FALSE
chr03	304116	304148	+	33	XUT0122_304116_304148_33	XUT0122	12	TRUE	TRUE	FALSE	FALSE	FALSE	FALSE	FALSE	FALSE	FALSE
chr03	303262	303339	+	78	XUT0122_303262_303339_78	XUT0122	1	TRUE	TRUE	TRUE	FALSE	TRUE	FALSE	TRUE	TRUE	TRUE
chr03	303364	303381	+	18	XUT0122_303364_303381_18	XUT0122	3	TRUE	TRUE	FALSE	FALSE	FALSE	FALSE	FALSE	FALSE	FALSE
chr03	303308	303325	+	18	XUT0122_303308_303325_18	XUT0122	2	TRUE	TRUE	FALSE	FALSE	FALSE	FALSE	FALSE	FALSE	FALSE
chr03	303485	303580	+	96	XUT0122_303485_303580_96	XUT0122	6	TRUE	TRUE	FALSE	FALSE	FALSE	FALSE	FALSE	FALSE	FALSE
chr03	303641	303670	+	30	XUT0122_303641_303670_30	XUT0122	7	TRUE	TRUE	FALSE	FALSE	FALSE	FALSE	FALSE	FALSE	FALSE
chr03	303770	303790	+	21	XUT0122_303770_303790_21	XUT0122	8	TRUE	TRUE	FALSE	FALSE	FALSE	FALSE	FALSE	FALSE	FALSE
chr03	303809	303865	+	57	XUT0122_303809_303865_57	XUT0122	9	TRUE	TRUE	FALSE	FALSE	FALSE	FALSE	FALSE	FALSE	FALSE
chr03	304094	304108	+	15	XUT0122_304094_304108_15	XUT0122	11	TRUE	TRUE	FALSE	FALSE	FALSE	FALSE	FALSE	FALSE	FALSE
chr03	309797	309829	-	33	XUT1022_309797_309829_33	XUT1022	3	TRUE	TRUE	TRUE	FALSE	FALSE	TRUE	TRUE	TRUE	TRUE
chr03	309512	309553	-	42	XUT1022_309512_309553_42	XUT1022	6	TRUE	TRUE	FALSE	FALSE	FALSE	FALSE	FALSE	FALSE	FALSE
chr03	308900	308995	-	96	XUT1022_308900_308995_96	XUT1022	10	TRUE	TRUE	FALSE	FALSE	FALSE	FALSE	FALSE	FALSE	FALSE
chr03	310012	310077	-	66	XUT1022_310012_310077_66	XUT1022	1	TRUE	TRUE	TRUE	FALSE	FALSE	TRUE	FALSE	TRUE	FALSE
chr03	309592	309651	-	60	XUT1022_309592_309651_60	XUT1022	4	TRUE	TRUE	FALSE	FALSE	FALSE	FALSE	FALSE	FALSE	FALSE
chr03	309466	309498	-	33	XUT1022_309466_309498_33	XUT1022	7	TRUE	TRUE	FALSE	FALSE	FALSE	FALSE	FALSE	FALSE	FALSE
chr03	309139	309273	-	135	XUT1022_309139_309273_135	XUT1022	8	TRUE	TRUE	TRUE	FALSE	FALSE	FALSE	FALSE	FALSE	FALSE
chr03	309007	309129	-	123	XUT1022_309007_309129_123	XUT1022	9	TRUE	TRUE	FALSE	FALSE	FALSE	FALSE	FALSE	FALSE	FALSE
chr03	308794	308910	-	117	XUT1022_308794_308910_117	XUT1022	11	TRUE	TRUE	FALSE	FALSE	FALSE	FALSE	FALSE	FALSE	FALSE
chr03	308617	308631	-	15	XUT1022_308617_308631_15	XUT1022	14	TRUE	TRUE	FALSE	FALSE	FALSE	FALSE	FALSE	FALSE	FALSE
chr03	308503	308532	-	30	XUT1022_308503_308532_30	XUT1022	16	TRUE	TRUE	FALSE	FALSE	FALSE	FALSE	FALSE	FALSE	FALSE
chr03	309753	309887	-	135	XUT1022_309753_309887_135	XUT1022	2	TRUE	TRUE	TRUE	TRUE	TRUE	FALSE	TRUE	TRUE	TRUE
chr03	309516	309635	-	120	XUT1022_309516_309635_120	XUT1022	5	TRUE	TRUE	FALSE	FALSE	FALSE	FALSE	FALSE	FALSE	FALSE
chr03	308856	308900	-	45	XUT1022_308856_308900_45	XUT1022	12	TRUE	TRUE	FALSE	FALSE	FALSE	FALSE	FALSE	FALSE	FALSE
chr03	308805	308852	-	48	XUT1022_308805_308852_48	XUT1022	13	TRUE	TRUE	FALSE	FALSE	FALSE	FALSE	FALSE	FALSE	FALSE
chr03	308562	308594	-	33	XUT1022_308562_308594_33	XUT1022	15	TRUE	TRUE	FALSE	FALSE	FALSE	FALSE	FALSE	FALSE	FALSE
chr03	312120	312239	-	120	XUT1023_312120_312239_120	XUT1023	1	TRUE	TRUE	FALSE	FALSE	FALSE	FALSE	FALSE	FALSE	FALSE
chr03	312002	312058	-	57	XUT1023_312002_312058_57	XUT1023	3	TRUE	TRUE	FALSE	FALSE	FALSE	FALSE	FALSE	FALSE	FALSE
chr03	311986	312075	-	90	XUT1023_311986_312075_90	XUT1023	2	TRUE	TRUE	FALSE	FALSE	FALSE	FALSE	FALSE	FALSE	FALSE
chr03	312813	312863	-	51	XUT1024_312813_312863_51	XUT1024	6	TRUE	TRUE	FALSE	FALSE	FALSE	FALSE	FALSE	FALSE	FALSE
chr03	312950	312988	-	39	XUT1024_312950_312988_39	XUT1024	4	TRUE	TRUE	FALSE	FALSE	FALSE	FALSE	FALSE	FALSE	FALSE
chr03	312629	312682	-	54	XUT1024_312629_312682_54	XUT1024	7	TRUE	TRUE	FALSE	FALSE	FALSE	FALSE	FALSE	FALSE	FALSE
chr03	313687	313716	-	30	XUT1024_313687_313716_30	XUT1024	1	TRUE	TRUE	FALSE	FALSE	FALSE	FALSE	FALSE	FALSE	FALSE
chr03	313606	313623	-	18	XUT1024_313606_313623_18	XUT1024	2	TRUE	TRUE	FALSE	FALSE	FALSE	FALSE	FALSE	FALSE	FALSE
chr03	313039	313053	-	15	XUT1024_313039_313053_15	XUT1024	3	TRUE	TRUE	FALSE	FALSE	FALSE	FALSE	FALSE	FALSE	FALSE
chr03	312880	312969	-	90	XUT1024_312880_312969_90	XUT1024	5	TRUE	TRUE	FALSE	FALSE	FALSE	FALSE	FALSE	FALSE	FALSE
chr03	314355	314561	-	207	XUT1025_314355_314561_207	XUT1025	1	TRUE	FALSE	TRUE	FALSE	FALSE	FALSE	FALSE	FALSE	FALSE
chr03	314069	314089	-	21	XUT1025_314069_314089_21	XUT1025	2	TRUE	FALSE	FALSE	FALSE	FALSE	FALSE	FALSE	FALSE	FALSE
chr03	313844	313879	-	36	XUT1025_313844_313879_36	XUT1025	5	TRUE	FALSE	FALSE	FALSE	FALSE	FALSE	FALSE	FALSE	FALSE
chr03	313963	313995	-	33	XUT1025_313963_313995_33	XUT1025	3	TRUE	FALSE	FALSE	FALSE	FALSE	FALSE	FALSE	FALSE	FALSE
chr03	313888	313914	-	27	XUT1025_313888_313914_27	XUT1025	4	TRUE	FALSE	FALSE	FALSE	FALSE	FALSE	FALSE	FALSE	FALSE
chr03	313750	313860	-	111	XUT1025_313750_313860_111	XUT1025	6	TRUE	FALSE	FALSE	FALSE	FALSE	FALSE	FALSE	FALSE	FALSE
chr04	4222	4254	-	33	XUT1026_4222_4254_33	XUT1026	2	TRUE	TRUE	FALSE	FALSE	FALSE	FALSE	FALSE	FALSE	FALSE
chr04	3610	3750	-	141	XUT1026_3610_3750_141	XUT1026	7	TRUE	TRUE	FALSE	FALSE	FALSE	FALSE	FALSE	FALSE	FALSE
chr04	3340	3417	-	78	XUT1026_3340_3417_78	XUT1026	12	TRUE	TRUE	FALSE	FALSE	FALSE	FALSE	FALSE	FALSE	FALSE
chr04	3226	3258	-	33	XUT1026_3226_3258_33	XUT1026	14	TRUE	TRUE	FALSE	FALSE	FALSE	FALSE	FALSE	FALSE	FALSE
chr04	3849	3893	-	45	XUT1026_3849_3893_45	XUT1026	5	TRUE	TRUE	FALSE	FALSE	FALSE	FALSE	FALSE	FALSE	FALSE
chr04	3771	3800	-	30	XUT1026_3771_3800_30	XUT1026	6	TRUE	TRUE	FALSE	FALSE	FALSE	FALSE	FALSE	FALSE	FALSE
chr04	3654	3746	-	93	XUT1026_3654_3746_93	XUT1026	8	TRUE	TRUE	FALSE	FALSE	FALSE	FALSE	FALSE	FALSE	FALSE
chr04	3507	3533	-	27	XUT1026_3507_3533_27	XUT1026	10	TRUE	TRUE	FALSE	FALSE	FALSE	FALSE	FALSE	FALSE	FALSE
chr04	3441	3491	-	51	XUT1026_3441_3491_51	XUT1026	11	TRUE	TRUE	FALSE	FALSE	FALSE	FALSE	FALSE	FALSE	FALSE
chr04	3282	3332	-	51	XUT1026_3282_3332_51	XUT1026	13	TRUE	TRUE	FALSE	FALSE	FALSE	FALSE	FALSE	FALSE	FALSE
chr04	4241	4258	-	18	XUT1026_4241_4258_18	XUT1026	1	TRUE	TRUE	FALSE	FALSE	FALSE	FALSE	FALSE	FALSE	FALSE
chr04	4085	4192	-	108	XUT1026_4085_4192_108	XUT1026	3	TRUE	TRUE	FALSE	FALSE	FALSE	FALSE	FALSE	FALSE	FALSE
chr04	4049	4072	-	24	XUT1026_4049_4072_24	XUT1026	4	TRUE	TRUE	FALSE	FALSE	FALSE	FALSE	FALSE	FALSE	FALSE
chr04	3575	3595	-	21	XUT1026_3575_3595_21	XUT1026	9	TRUE	TRUE	FALSE	FALSE	FALSE	FALSE	FALSE	FALSE	FALSE
chr04	4792	4818	-	27	XUT1027_4792_4818_27	XUT1027	3	TRUE	TRUE	FALSE	FALSE	FALSE	FALSE	FALSE	FALSE	FALSE
chr04	4674	4700	-	27	XUT1027_4674_4700_27	XUT1027	4	TRUE	TRUE	FALSE	FALSE	FALSE	FALSE	FALSE	FALSE	FALSE
chr04	4850	4888	-	39	XUT1027_4850_4888_39	XUT1027	1	TRUE	TRUE	FALSE	FALSE	FALSE	FALSE	FALSE	FALSE	FALSE
chr04	4775	4837	-	63	XUT1027_4775_4837_63	XUT1027	2	TRUE	TRUE	FALSE	FALSE	FALSE	FALSE	FALSE	FALSE	FALSE
chr04	5603	5725	-	123	XUT1028_5603_5725_123	XUT1028	1	TRUE	TRUE	FALSE	FALSE	FALSE	FALSE	FALSE	FALSE	FALSE
chr04	5158	5238	-	81	XUT1028_5158_5238_81	XUT1028	2	TRUE	TRUE	FALSE	FALSE	FALSE	FALSE	FALSE	FALSE	FALSE
chr04	11758	11859	+	102	XUT0123_11758_11859_102	XUT0123	1	TRUE	TRUE	TRUE	FALSE	FALSE	FALSE	FALSE	FALSE	FALSE
chr04	11962	11985	+	24	XUT0123_11962_11985_24	XUT0123	3	TRUE	TRUE	FALSE	FALSE	FALSE	FALSE	FALSE	FALSE	FALSE
chr04	11916	12026	+	111	XUT0123_11916_12026_111	XUT0123	2	TRUE	TRUE	FALSE	FALSE	FALSE	FALSE	FALSE	FALSE	FALSE
chr04	12546	12701	+	156	XUT0124_12546_12701_156	XUT0124	3	TRUE	TRUE	FALSE	FALSE	FALSE	FALSE	FALSE	FALSE	FALSE
chr04	12738	12842	+	105	XUT0124_12738_12842_105	XUT0124	5	TRUE	TRUE	FALSE	FALSE	FALSE	FALSE	FALSE	FALSE	FALSE
chr04	12846	12878	+	33	XUT0124_12846_12878_33	XUT0124	7	TRUE	TRUE	FALSE	FALSE	FALSE	FALSE	FALSE	FALSE	FALSE
chr04	12442	12483	+	42	XUT0124_12442_12483_42	XUT0124	1	TRUE	TRUE	FALSE	FALSE	FALSE	FALSE	FALSE	FALSE	FALSE
chr04	12511	12534	+	24	XUT0124_12511_12534_24	XUT0124	2	TRUE	TRUE	FALSE	FALSE	FALSE	FALSE	FALSE	FALSE	FALSE
chr04	12754	12846	+	93	XUT0124_12754_12846_93	XUT0124	6	TRUE	TRUE	FALSE	FALSE	FALSE	FALSE	FALSE	FALSE	FALSE
chr04	12566	12607	+	42	XUT0124_12566_12607_42	XUT0124	4	TRUE	TRUE	FALSE	FALSE	FALSE	FALSE	FALSE	FALSE	FALSE
chr04	22260	22280	-	21	XUT1029_22260_22280_21	XUT1029	2	FALSE	FALSE	FALSE	FALSE	FALSE	FALSE	FALSE	FALSE	FALSE
chr04	22255	22293	-	39	XUT1029_22255_22293_39	XUT1029	1	FALSE	FALSE	FALSE	FALSE	FALSE	FALSE	FALSE	FALSE	FALSE
chr04	36061	36180	+	120	XUT0125_36061_36180_120	XUT0125	7	TRUE	TRUE	FALSE	FALSE	FALSE	FALSE	FALSE	FALSE	FALSE
chr04	35495	35533	+	39	XUT0125_35495_35533_39	XUT0125	1	TRUE	TRUE	TRUE	FALSE	FALSE	FALSE	TRUE	TRUE	TRUE
chr04	35678	35836	+	159	XUT0125_35678_35836_159	XUT0125	3	TRUE	TRUE	FALSE	FALSE	FALSE	FALSE	FALSE	FALSE	FALSE
chr04	36008	36061	+	54	XUT0125_36008_36061_54	XUT0125	5	TRUE	TRUE	FALSE	FALSE	FALSE	FALSE	FALSE	FALSE	FALSE
chr04	36167	36202	+	36	XUT0125_36167_36202_36	XUT0125	8	TRUE	TRUE	FALSE	FALSE	FALSE	FALSE	FALSE	FALSE	FALSE
chr04	36488	36532	+	45	XUT0125_36488_36532_45	XUT0125	10	TRUE	TRUE	FALSE	FALSE	FALSE	FALSE	FALSE	FALSE	FALSE
chr04	36617	36655	+	39	XUT0125_36617_36655_39	XUT0125	12	TRUE	TRUE	FALSE	FALSE	FALSE	FALSE	FALSE	FALSE	FALSE
chr04	35565	35618	+	54	XUT0125_35565_35618_54	XUT0125	2	TRUE	TRUE	FALSE	FALSE	FALSE	FALSE	FALSE	FALSE	FALSE
chr04	36000	36038	+	39	XUT0125_36000_36038_39	XUT0125	4	TRUE	TRUE	FALSE	FALSE	FALSE	FALSE	FALSE	FALSE	FALSE
chr04	36045	36092	+	48	XUT0125_36045_36092_48	XUT0125	6	TRUE	TRUE	FALSE	FALSE	FALSE	FALSE	FALSE	FALSE	FALSE
chr04	36321	36389	+	69	XUT0125_36321_36389_69	XUT0125	9	TRUE	TRUE	FALSE	FALSE	FALSE	FALSE	FALSE	FALSE	FALSE
chr04	36492	36578	+	87	XUT0125_36492_36578_87	XUT0125	11	TRUE	TRUE	FALSE	FALSE	FALSE	FALSE	FALSE	FALSE	FALSE
chr04	46636	46689	+	54	XUT0126_46636_46689_54	XUT0126	3	TRUE	TRUE	TRUE	FALSE	FALSE	FALSE	FALSE	FALSE	FALSE
chr04	46801	46851	+	51	XUT0126_46801_46851_51	XUT0126	5	TRUE	TRUE	FALSE	FALSE	FALSE	FALSE	FALSE	FALSE	FALSE
chr04	46966	47091	+	126	XUT0126_46966_47091_126	XUT0126	8	TRUE	TRUE	FALSE	FALSE	FALSE	FALSE	FALSE	FALSE	FALSE
chr04	47161	47268	+	108	XUT0126_47161_47268_108	XUT0126	10	TRUE	TRUE	FALSE	FALSE	FALSE	FALSE	FALSE	FALSE	FALSE
chr04	46472	46582	+	111	XUT0126_46472_46582_111	XUT0126	2	TRUE	TRUE	FALSE	FALSE	FALSE	FALSE	FALSE	FALSE	FALSE
chr04	46676	46801	+	126	XUT0126_46676_46801_126	XUT0126	4	TRUE	TRUE	TRUE	FALSE	FALSE	FALSE	FALSE	FALSE	FALSE
chr04	46943	46966	+	24	XUT0126_46943_46966_24	XUT0126	7	TRUE	TRUE	FALSE	FALSE	FALSE	FALSE	FALSE	FALSE	FALSE
chr04	47078	47137	+	60	XUT0126_47078_47137_60	XUT0126	9	TRUE	TRUE	FALSE	FALSE	FALSE	FALSE	FALSE	FALSE	FALSE
chr04	47219	47242	+	24	XUT0126_47219_47242_24	XUT0126	11	TRUE	TRUE	FALSE	FALSE	FALSE	FALSE	FALSE	FALSE	FALSE
chr04	46395	46469	+	75	XUT0126_46395_46469_75	XUT0126	1	TRUE	TRUE	FALSE	FALSE	FALSE	FALSE	FALSE	FALSE	FALSE
chr04	46881	46970	+	90	XUT0126_46881_46970_90	XUT0126	6	TRUE	TRUE	FALSE	FALSE	FALSE	FALSE	FALSE	FALSE	FALSE
chr04	47487	47507	+	21	XUT0126_47487_47507_21	XUT0126	12	TRUE	TRUE	FALSE	FALSE	FALSE	FALSE	FALSE	FALSE	FALSE
chr04	47541	47636	+	96	XUT0126_47541_47636_96	XUT0126	13	TRUE	TRUE	FALSE	FALSE	FALSE	FALSE	FALSE	FALSE	FALSE
chr04	48071	48112	+	42	XUT0127_48071_48112_42	XUT0127	4	TRUE	TRUE	FALSE	FALSE	FALSE	FALSE	FALSE	FALSE	FALSE
chr04	48371	48412	+	42	XUT0127_48371_48412_42	XUT0127	8	TRUE	TRUE	FALSE	FALSE	FALSE	FALSE	FALSE	FALSE	FALSE
chr04	48452	48493	+	42	XUT0127_48452_48493_42	XUT0127	10	TRUE	TRUE	FALSE	FALSE	FALSE	FALSE	FALSE	FALSE	FALSE
chr04	48737	48889	+	153	XUT0127_48737_48889_153	XUT0127	12	TRUE	TRUE	FALSE	FALSE	FALSE	FALSE	FALSE	FALSE	FALSE
chr04	47919	47954	+	36	XUT0127_47919_47954_36	XUT0127	1	TRUE	TRUE	FALSE	FALSE	FALSE	FALSE	FALSE	FALSE	FALSE
chr04	47979	48044	+	66	XUT0127_47979_48044_66	XUT0127	2	TRUE	TRUE	FALSE	FALSE	FALSE	FALSE	FALSE	FALSE	FALSE
chr04	48063	48077	+	15	XUT0127_48063_48077_15	XUT0127	3	TRUE	TRUE	FALSE	FALSE	FALSE	FALSE	FALSE	FALSE	FALSE
chr04	48138	48290	+	153	XUT0127_48138_48290_153	XUT0127	5	TRUE	TRUE	FALSE	FALSE	TRUE	TRUE	TRUE	TRUE	TRUE
chr04	48417	48440	+	24	XUT0127_48417_48440_24	XUT0127	9	TRUE	TRUE	FALSE	FALSE	FALSE	FALSE	FALSE	FALSE	FALSE
chr04	48594	48752	+	159	XUT0127_48594_48752_159	XUT0127	11	TRUE	TRUE	TRUE	FALSE	FALSE	FALSE	FALSE	FALSE	FALSE
chr04	48867	48935	+	69	XUT0127_48867_48935_69	XUT0127	14	TRUE	TRUE	FALSE	FALSE	FALSE	FALSE	FALSE	FALSE	FALSE
chr04	48187	48216	+	30	XUT0127_48187_48216_30	XUT0127	6	TRUE	TRUE	TRUE	FALSE	FALSE	FALSE	TRUE	TRUE	FALSE
chr04	48334	48417	+	84	XUT0127_48334_48417_84	XUT0127	7	TRUE	TRUE	FALSE	FALSE	FALSE	FALSE	FALSE	FALSE	FALSE
chr04	48763	48795	+	33	XUT0127_48763_48795_33	XUT0127	13	TRUE	TRUE	FALSE	FALSE	FALSE	FALSE	FALSE	FALSE	FALSE
chr04	48655	48753	-	99	XUT1030_48655_48753_99	XUT1030	3	TRUE	TRUE	FALSE	FALSE	FALSE	FALSE	FALSE	FALSE	FALSE
chr04	48616	48645	-	30	XUT1030_48616_48645_30	XUT1030	5	TRUE	TRUE	FALSE	FALSE	FALSE	FALSE	FALSE	FALSE	FALSE
chr04	48346	48453	-	108	XUT1030_48346_48453_108	XUT1030	7	TRUE	TRUE	TRUE	FALSE	TRUE	FALSE	TRUE	TRUE	FALSE
chr04	48849	48875	-	27	XUT1030_48849_48875_27	XUT1030	2	TRUE	TRUE	FALSE	FALSE	FALSE	FALSE	FALSE	FALSE	FALSE
chr04	48372	48413	-	42	XUT1030_48372_48413_42	XUT1030	8	TRUE	TRUE	TRUE	FALSE	FALSE	FALSE	FALSE	FALSE	FALSE
chr04	48863	48931	-	69	XUT1030_48863_48931_69	XUT1030	1	TRUE	TRUE	FALSE	FALSE	FALSE	FALSE	FALSE	FALSE	FALSE
chr04	48563	48718	-	156	XUT1030_48563_48718_156	XUT1030	4	TRUE	TRUE	TRUE	FALSE	FALSE	FALSE	FALSE	FALSE	FALSE
chr04	48404	48553	-	150	XUT1030_48404_48553_150	XUT1030	6	TRUE	TRUE	TRUE	FALSE	FALSE	FALSE	TRUE	TRUE	FALSE
chr04	49406	49420	+	15	XUT0128_49406_49420_15	XUT0128	1	TRUE	TRUE	FALSE	FALSE	FALSE	FALSE	FALSE	FALSE	FALSE
chr04	49520	49591	+	72	XUT0128_49520_49591_72	XUT0128	3	TRUE	TRUE	FALSE	FALSE	FALSE	FALSE	FALSE	FALSE	FALSE
chr04	49607	49702	+	96	XUT0128_49607_49702_96	XUT0128	4	TRUE	TRUE	FALSE	FALSE	FALSE	FALSE	FALSE	FALSE	FALSE
chr04	49461	49487	+	27	XUT0128_49461_49487_27	XUT0128	2	TRUE	TRUE	FALSE	FALSE	FALSE	FALSE	FALSE	FALSE	FALSE
chr04	49927	49947	+	21	XUT0129_49927_49947_21	XUT0129	1	TRUE	TRUE	TRUE	FALSE	FALSE	FALSE	FALSE	FALSE	FALSE
chr04	50029	50244	+	216	XUT0129_50029_50244_216	XUT0129	3	TRUE	TRUE	TRUE	FALSE	FALSE	FALSE	TRUE	TRUE	TRUE
chr04	50287	50307	+	21	XUT0129_50287_50307_21	XUT0129	6	TRUE	TRUE	FALSE	FALSE	FALSE	FALSE	FALSE	FALSE	FALSE
chr04	50320	50358	+	39	XUT0129_50320_50358_39	XUT0129	8	TRUE	TRUE	FALSE	FALSE	FALSE	FALSE	FALSE	FALSE	FALSE
chr04	50443	50469	+	27	XUT0129_50443_50469_27	XUT0129	10	TRUE	TRUE	TRUE	FALSE	TRUE	FALSE	TRUE	TRUE	TRUE
chr04	50527	50574	+	48	XUT0129_50527_50574_48	XUT0129	11	TRUE	TRUE	FALSE	FALSE	TRUE	FALSE	TRUE	TRUE	TRUE
chr04	50581	50613	+	33	XUT0129_50581_50613_33	XUT0129	12	TRUE	TRUE	FALSE	FALSE	FALSE	FALSE	FALSE	FALSE	FALSE
chr04	50698	50832	+	135	XUT0129_50698_50832_135	XUT0129	14	TRUE	TRUE	FALSE	FALSE	FALSE	FALSE	FALSE	FALSE	FALSE
chr04	50860	50889	+	30	XUT0129_50860_50889_30	XUT0129	15	TRUE	TRUE	FALSE	FALSE	FALSE	FALSE	FALSE	FALSE	FALSE
chr04	49997	50050	+	54	XUT0129_49997_50050_54	XUT0129	2	TRUE	TRUE	TRUE	FALSE	TRUE	FALSE	TRUE	TRUE	TRUE
chr04	50093	50158	+	66	XUT0129_50093_50158_66	XUT0129	4	TRUE	TRUE	TRUE	FALSE	TRUE	FALSE	TRUE	TRUE	TRUE
chr04	50345	50494	+	150	XUT0129_50345_50494_150	XUT0129	9	TRUE	TRUE	TRUE	FALSE	TRUE	FALSE	FALSE	TRUE	TRUE
chr04	50268	50300	+	33	XUT0129_50268_50300_33	XUT0129	5	TRUE	TRUE	FALSE	FALSE	FALSE	FALSE	FALSE	FALSE	FALSE
chr04	50307	50345	+	39	XUT0129_50307_50345_39	XUT0129	7	TRUE	TRUE	FALSE	FALSE	FALSE	FALSE	FALSE	FALSE	FALSE
chr04	50607	50657	+	51	XUT0129_50607_50657_51	XUT0129	13	TRUE	TRUE	TRUE	FALSE	FALSE	FALSE	FALSE	FALSE	FALSE
chr04	59709	59726	+	18	XUT0130_59709_59726_18	XUT0130	5	TRUE	TRUE	FALSE	FALSE	FALSE	FALSE	FALSE	FALSE	FALSE
chr04	59754	59789	+	36	XUT0130_59754_59789_36	XUT0130	7	TRUE	TRUE	FALSE	FALSE	FALSE	FALSE	FALSE	FALSE	FALSE
chr04	59557	59571	+	15	XUT0130_59557_59571_15	XUT0130	2	TRUE	TRUE	FALSE	FALSE	FALSE	FALSE	FALSE	FALSE	FALSE
chr04	59596	59634	+	39	XUT0130_59596_59634_39	XUT0130	3	TRUE	TRUE	FALSE	FALSE	FALSE	FALSE	FALSE	FALSE	FALSE
chr04	59650	59706	+	57	XUT0130_59650_59706_57	XUT0130	4	TRUE	TRUE	FALSE	FALSE	FALSE	FALSE	FALSE	FALSE	FALSE
chr04	59731	59943	+	213	XUT0130_59731_59943_213	XUT0130	6	TRUE	TRUE	FALSE	FALSE	FALSE	FALSE	FALSE	FALSE	FALSE
chr04	59947	59967	+	21	XUT0130_59947_59967_21	XUT0130	8	TRUE	TRUE	FALSE	FALSE	FALSE	FALSE	FALSE	FALSE	FALSE
chr04	60034	60066	+	33	XUT0130_60034_60066_33	XUT0130	9	TRUE	TRUE	FALSE	FALSE	FALSE	FALSE	FALSE	FALSE	FALSE
chr04	60169	60186	+	18	XUT0130_60169_60186_18	XUT0130	10	TRUE	TRUE	FALSE	FALSE	FALSE	FALSE	FALSE	FALSE	FALSE
chr04	59462	59518	+	57	XUT0130_59462_59518_57	XUT0130	1	TRUE	TRUE	FALSE	FALSE	FALSE	FALSE	FALSE	FALSE	FALSE
chr04	60194	60295	+	102	XUT0130_60194_60295_102	XUT0130	11	TRUE	TRUE	FALSE	FALSE	FALSE	FALSE	FALSE	FALSE	FALSE
chr04	60386	60418	+	33	XUT0130_60386_60418_33	XUT0130	12	TRUE	TRUE	FALSE	FALSE	FALSE	FALSE	FALSE	FALSE	FALSE
chr04	73541	73579	+	39	XUT0131_73541_73579_39	XUT0131	1	TRUE	TRUE	FALSE	FALSE	FALSE	FALSE	FALSE	FALSE	FALSE
chr04	73646	73663	+	18	XUT0131_73646_73663_18	XUT0131	3	TRUE	TRUE	TRUE	FALSE	FALSE	FALSE	FALSE	FALSE	FALSE
chr04	74072	74107	+	36	XUT0131_74072_74107_36	XUT0131	9	TRUE	TRUE	FALSE	FALSE	FALSE	FALSE	FALSE	FALSE	FALSE
chr04	74129	74224	+	96	XUT0131_74129_74224_96	XUT0131	10	TRUE	TRUE	FALSE	FALSE	FALSE	FALSE	FALSE	FALSE	FALSE
chr04	73572	73589	+	18	XUT0131_73572_73589_18	XUT0131	2	TRUE	TRUE	FALSE	FALSE	FALSE	FALSE	FALSE	FALSE	FALSE
chr04	73650	73715	+	66	XUT0131_73650_73715_66	XUT0131	4	TRUE	TRUE	TRUE	FALSE	FALSE	FALSE	FALSE	FALSE	FALSE
chr04	73839	73979	+	141	XUT0131_73839_73979_141	XUT0131	6	TRUE	TRUE	FALSE	FALSE	FALSE	FALSE	FALSE	FALSE	FALSE
chr04	74013	74072	+	60	XUT0131_74013_74072_60	XUT0131	8	TRUE	TRUE	FALSE	FALSE	FALSE	FALSE	FALSE	FALSE	FALSE
chr04	74172	74255	+	84	XUT0131_74172_74255_84	XUT0131	11	TRUE	TRUE	FALSE	FALSE	FALSE	FALSE	FALSE	FALSE	FALSE
chr04	73708	73755	+	48	XUT0131_73708_73755_48	XUT0131	5	TRUE	TRUE	FALSE	FALSE	FALSE	FALSE	FALSE	FALSE	FALSE
chr04	73843	73971	+	129	XUT0131_73843_73971_129	XUT0131	7	TRUE	TRUE	FALSE	FALSE	FALSE	FALSE	FALSE	FALSE	FALSE
chr04	74266	74304	+	39	XUT0131_74266_74304_39	XUT0131	12	TRUE	TRUE	FALSE	FALSE	FALSE	FALSE	FALSE	FALSE	FALSE
chr04	74416	74601	+	186	XUT0132_74416_74601_186	XUT0132	1	TRUE	TRUE	TRUE	FALSE	TRUE	FALSE	TRUE	TRUE	TRUE
chr04	75100	75204	+	105	XUT0132_75100_75204_105	XUT0132	9	TRUE	TRUE	FALSE	FALSE	FALSE	FALSE	FALSE	FALSE	FALSE
chr04	75745	75798	+	54	XUT0132_75745_75798_54	XUT0132	17	TRUE	TRUE	FALSE	FALSE	FALSE	FALSE	FALSE	FALSE	FALSE
chr04	75904	76023	+	120	XUT0132_75904_76023_120	XUT0132	18	TRUE	TRUE	FALSE	FALSE	FALSE	FALSE	FALSE	FALSE	FALSE
chr04	74471	74485	+	15	XUT0132_74471_74485_15	XUT0132	2	TRUE	TRUE	FALSE	FALSE	FALSE	FALSE	FALSE	FALSE	FALSE
chr04	74492	74506	+	15	XUT0132_74492_74506_15	XUT0132	3	TRUE	TRUE	FALSE	FALSE	FALSE	FALSE	FALSE	FALSE	FALSE
chr04	74615	74665	+	51	XUT0132_74615_74665_51	XUT0132	5	TRUE	TRUE	FALSE	FALSE	FALSE	FALSE	FALSE	FALSE	FALSE
chr04	74693	74728	+	36	XUT0132_74693_74728_36	XUT0132	6	TRUE	TRUE	FALSE	FALSE	FALSE	FALSE	FALSE	FALSE	FALSE
chr04	75113	75172	+	60	XUT0132_75113_75172_60	XUT0132	10	TRUE	TRUE	FALSE	FALSE	FALSE	FALSE	FALSE	FALSE	FALSE
chr04	75323	75517	+	195	XUT0132_75323_75517_195	XUT0132	12	TRUE	TRUE	FALSE	FALSE	FALSE	FALSE	FALSE	FALSE	FALSE
chr04	75557	75649	+	93	XUT0132_75557_75649_93	XUT0132	14	TRUE	TRUE	FALSE	FALSE	FALSE	FALSE	FALSE	FALSE	FALSE
chr04	76190	76468	+	279	XUT0132_76190_76468_279	XUT0132	20	TRUE	TRUE	FALSE	FALSE	FALSE	FALSE	FALSE	FALSE	FALSE
chr04	76691	76765	+	75	XUT0132_76691_76765_75	XUT0132	25	TRUE	TRUE	FALSE	FALSE	FALSE	FALSE	FALSE	FALSE	FALSE
chr04	76967	77011	+	45	XUT0132_76967_77011_45	XUT0132	27	TRUE	TRUE	FALSE	FALSE	FALSE	FALSE	FALSE	FALSE	FALSE
chr04	74535	74585	+	51	XUT0132_74535_74585_51	XUT0132	4	TRUE	TRUE	FALSE	FALSE	FALSE	TRUE	TRUE	TRUE	TRUE
chr04	74793	74822	+	30	XUT0132_74793_74822_30	XUT0132	7	TRUE	TRUE	FALSE	FALSE	FALSE	FALSE	FALSE	FALSE	FALSE
chr04	75009	75137	+	129	XUT0132_75009_75137_129	XUT0132	8	TRUE	TRUE	TRUE	FALSE	FALSE	FALSE	FALSE	FALSE	FALSE
chr04	75267	75329	+	63	XUT0132_75267_75329_63	XUT0132	11	TRUE	TRUE	FALSE	FALSE	FALSE	FALSE	FALSE	FALSE	FALSE
chr04	75381	75521	+	141	XUT0132_75381_75521_141	XUT0132	13	TRUE	TRUE	FALSE	FALSE	FALSE	FALSE	FALSE	FALSE	FALSE
chr04	75567	75617	+	51	XUT0132_75567_75617_51	XUT0132	15	TRUE	TRUE	FALSE	FALSE	FALSE	FALSE	FALSE	FALSE	FALSE
chr04	75657	75677	+	21	XUT0132_75657_75677_21	XUT0132	16	TRUE	TRUE	FALSE	FALSE	FALSE	FALSE	FALSE	FALSE	FALSE
chr04	75921	75953	+	33	XUT0132_75921_75953_33	XUT0132	19	TRUE	TRUE	FALSE	FALSE	FALSE	FALSE	FALSE	FALSE	FALSE
chr04	76374	76400	+	27	XUT0132_76374_76400_27	XUT0132	21	TRUE	TRUE	FALSE	FALSE	FALSE	FALSE	FALSE	FALSE	FALSE
chr04	76452	76496	+	45	XUT0132_76452_76496_45	XUT0132	22	TRUE	TRUE	FALSE	FALSE	FALSE	FALSE	FALSE	FALSE	FALSE
chr04	76554	76643	+	90	XUT0132_76554_76643_90	XUT0132	23	TRUE	TRUE	FALSE	FALSE	FALSE	FALSE	FALSE	FALSE	FALSE
chr04	76659	76691	+	33	XUT0132_76659_76691_33	XUT0132	24	TRUE	TRUE	FALSE	FALSE	FALSE	FALSE	FALSE	FALSE	FALSE
chr04	76695	76781	+	87	XUT0132_76695_76781_87	XUT0132	26	TRUE	TRUE	FALSE	FALSE	FALSE	FALSE	FALSE	FALSE	FALSE
chr04	80866	80892	+	27	XUT0134_80866_80892_27	XUT0134	2	TRUE	TRUE	FALSE	FALSE	FALSE	FALSE	FALSE	FALSE	FALSE
chr04	80923	80952	+	30	XUT0134_80923_80952_30	XUT0134	4	TRUE	TRUE	FALSE	FALSE	FALSE	FALSE	FALSE	FALSE	FALSE
chr04	81184	81219	+	36	XUT0134_81184_81219_36	XUT0134	10	TRUE	TRUE	FALSE	FALSE	FALSE	FALSE	FALSE	FALSE	FALSE
chr04	81493	81762	+	270	XUT0134_81493_81762_270	XUT0134	14	TRUE	TRUE	FALSE	FALSE	FALSE	FALSE	FALSE	FALSE	FALSE
chr04	81946	81990	+	45	XUT0134_81946_81990_45	XUT0134	16	TRUE	TRUE	FALSE	FALSE	FALSE	FALSE	FALSE	FALSE	FALSE
chr04	82069	82131	+	63	XUT0134_82069_82131_63	XUT0134	17	TRUE	TRUE	FALSE	FALSE	FALSE	FALSE	FALSE	FALSE	FALSE
chr04	82186	82257	+	72	XUT0134_82186_82257_72	XUT0134	20	TRUE	TRUE	FALSE	FALSE	FALSE	FALSE	FALSE	FALSE	FALSE
chr04	82516	82530	+	15	XUT0134_82516_82530_15	XUT0134	24	TRUE	TRUE	FALSE	FALSE	FALSE	FALSE	FALSE	FALSE	FALSE
chr04	82900	82992	+	93	XUT0134_82900_82992_93	XUT0134	28	TRUE	TRUE	FALSE	FALSE	FALSE	FALSE	FALSE	FALSE	FALSE
chr04	83068	83082	+	15	XUT0134_83068_83082_15	XUT0134	30	TRUE	TRUE	FALSE	FALSE	FALSE	FALSE	FALSE	FALSE	FALSE
chr04	83101	83148	+	48	XUT0134_83101_83148_48	XUT0134	31	TRUE	TRUE	FALSE	FALSE	FALSE	FALSE	FALSE	FALSE	FALSE
chr04	80690	80755	+	66	XUT0134_80690_80755_66	XUT0134	1	TRUE	TRUE	TRUE	FALSE	FALSE	FALSE	TRUE	TRUE	FALSE
chr04	80906	80947	+	42	XUT0134_80906_80947_42	XUT0134	3	TRUE	TRUE	FALSE	FALSE	FALSE	FALSE	FALSE	FALSE	FALSE
chr04	80957	80980	+	24	XUT0134_80957_80980_24	XUT0134	5	TRUE	TRUE	FALSE	FALSE	FALSE	FALSE	FALSE	FALSE	FALSE
chr04	80984	81007	+	24	XUT0134_80984_81007_24	XUT0134	6	TRUE	TRUE	FALSE	FALSE	FALSE	FALSE	FALSE	FALSE	FALSE
chr04	81164	81181	+	18	XUT0134_81164_81181_18	XUT0134	9	TRUE	TRUE	FALSE	FALSE	FALSE	FALSE	FALSE	FALSE	FALSE
chr04	81485	81520	+	36	XUT0134_81485_81520_36	XUT0134	13	TRUE	TRUE	FALSE	FALSE	FALSE	FALSE	FALSE	FALSE	FALSE
chr04	81815	81859	+	45	XUT0134_81815_81859_45	XUT0134	15	TRUE	TRUE	FALSE	FALSE	FALSE	FALSE	FALSE	FALSE	FALSE
chr04	82217	82390	+	174	XUT0134_82217_82390_174	XUT0134	21	TRUE	TRUE	TRUE	FALSE	FALSE	FALSE	FALSE	FALSE	FALSE
chr04	82445	82564	+	120	XUT0134_82445_82564_120	XUT0134	23	TRUE	TRUE	FALSE	FALSE	FALSE	FALSE	FALSE	FALSE	FALSE
chr04	82634	82666	+	33	XUT0134_82634_82666_33	XUT0134	25	TRUE	TRUE	FALSE	FALSE	FALSE	FALSE	FALSE	FALSE	FALSE
chr04	82724	82741	+	18	XUT0134_82724_82741_18	XUT0134	26	TRUE	TRUE	FALSE	FALSE	FALSE	FALSE	FALSE	FALSE	FALSE
chr04	83105	83224	+	120	XUT0134_83105_83224_120	XUT0134	32	TRUE	TRUE	FALSE	FALSE	FALSE	FALSE	FALSE	FALSE	FALSE
chr04	81027	81059	+	33	XUT0134_81027_81059_33	XUT0134	7	TRUE	TRUE	FALSE	FALSE	FALSE	FALSE	FALSE	FALSE	FALSE
chr04	81063	81098	+	36	XUT0134_81063_81098_36	XUT0134	8	TRUE	TRUE	FALSE	FALSE	FALSE	FALSE	FALSE	FALSE	FALSE
chr04	81219	81236	+	18	XUT0134_81219_81236_18	XUT0134	11	TRUE	TRUE	FALSE	FALSE	FALSE	FALSE	FALSE	FALSE	FALSE
chr04	81471	81551	+	81	XUT0134_81471_81551_81	XUT0134	12	TRUE	TRUE	FALSE	FALSE	FALSE	FALSE	FALSE	FALSE	FALSE
chr04	82131	82145	+	15	XUT0134_82131_82145_15	XUT0134	18	TRUE	TRUE	FALSE	FALSE	FALSE	FALSE	FALSE	FALSE	FALSE
chr04	82179	82223	+	45	XUT0134_82179_82223_45	XUT0134	19	TRUE	TRUE	FALSE	FALSE	FALSE	FALSE	FALSE	FALSE	FALSE
chr04	82395	82415	+	21	XUT0134_82395_82415_21	XUT0134	22	TRUE	TRUE	FALSE	FALSE	FALSE	FALSE	FALSE	FALSE	FALSE
chr04	82830	82847	+	18	XUT0134_82830_82847_18	XUT0134	27	TRUE	TRUE	FALSE	FALSE	FALSE	FALSE	FALSE	FALSE	FALSE
chr04	83061	83078	+	18	XUT0134_83061_83078_18	XUT0134	29	TRUE	TRUE	FALSE	FALSE	FALSE	FALSE	FALSE	FALSE	FALSE
chr04	101720	101752	+	33	XUT0135_101720_101752_33	XUT0135	1	TRUE	TRUE	FALSE	FALSE	FALSE	FALSE	FALSE	FALSE	FALSE
chr04	103071	103091	+	21	XUT0136_103071_103091_21	XUT0136	5	TRUE	TRUE	FALSE	FALSE	FALSE	FALSE	FALSE	FALSE	FALSE
chr04	102889	102951	+	63	XUT0136_102889_102951_63	XUT0136	3	TRUE	TRUE	FALSE	FALSE	FALSE	FALSE	FALSE	FALSE	FALSE
chr04	103012	103032	+	21	XUT0136_103012_103032_21	XUT0136	4	TRUE	TRUE	FALSE	FALSE	FALSE	FALSE	FALSE	FALSE	FALSE
chr04	102737	102811	+	75	XUT0136_102737_102811_75	XUT0136	1	TRUE	TRUE	FALSE	FALSE	FALSE	FALSE	FALSE	FALSE	FALSE
chr04	102830	102886	+	57	XUT0136_102830_102886_57	XUT0136	2	TRUE	TRUE	FALSE	FALSE	FALSE	FALSE	FALSE	FALSE	FALSE
chr04	116034	116048	-	15	XUT1031_116034_116048_15	XUT1031	1	FALSE	TRUE	FALSE	FALSE	FALSE	FALSE	FALSE	FALSE	FALSE
chr04	115944	115958	-	15	XUT1031_115944_115958_15	XUT1031	2	FALSE	TRUE	FALSE	FALSE	FALSE	FALSE	FALSE	FALSE	FALSE
chr04	115668	115688	-	21	XUT1031_115668_115688_21	XUT1031	5	FALSE	TRUE	FALSE	FALSE	FALSE	FALSE	FALSE	FALSE	FALSE
chr04	115838	115897	-	60	XUT1031_115838_115897_60	XUT1031	3	FALSE	TRUE	TRUE	FALSE	TRUE	FALSE	TRUE	TRUE	TRUE
chr04	115709	115750	-	42	XUT1031_115709_115750_42	XUT1031	4	FALSE	TRUE	FALSE	FALSE	FALSE	FALSE	FALSE	FALSE	FALSE
chr04	132336	132539	-	204	XUT1032_132336_132539_204	XUT1032	1	TRUE	TRUE	FALSE	FALSE	TRUE	FALSE	FALSE	TRUE	TRUE
chr04	134630	134689	-	60	XUT1033_134630_134689_60	XUT1033	1	FALSE	FALSE	FALSE	FALSE	FALSE	FALSE	FALSE	FALSE	FALSE
chr04	134414	134596	-	183	XUT1033_134414_134596_183	XUT1033	2	FALSE	FALSE	FALSE	FALSE	FALSE	FALSE	FALSE	FALSE	FALSE
chr04	135476	135547	-	72	XUT1034_135476_135547_72	XUT1034	1	TRUE	TRUE	TRUE	FALSE	FALSE	TRUE	TRUE	TRUE	TRUE
chr04	135020	135130	-	111	XUT1034_135020_135130_111	XUT1034	5	TRUE	TRUE	FALSE	FALSE	TRUE	FALSE	FALSE	TRUE	TRUE
chr04	134762	134833	-	72	XUT1034_134762_134833_72	XUT1034	8	TRUE	TRUE	FALSE	FALSE	FALSE	FALSE	FALSE	FALSE	FALSE
chr04	135115	135141	-	27	XUT1034_135115_135141_27	XUT1034	4	TRUE	TRUE	FALSE	FALSE	FALSE	FALSE	FALSE	FALSE	FALSE
chr04	134962	134976	-	15	XUT1034_134962_134976_15	XUT1034	6	TRUE	TRUE	FALSE	FALSE	FALSE	FALSE	FALSE	FALSE	FALSE
chr04	134851	134886	-	36	XUT1034_134851_134886_36	XUT1034	7	TRUE	TRUE	FALSE	FALSE	FALSE	FALSE	FALSE	FALSE	FALSE
chr04	134755	134778	-	24	XUT1034_134755_134778_24	XUT1034	10	TRUE	TRUE	FALSE	FALSE	FALSE	FALSE	FALSE	FALSE	FALSE
chr04	135333	135440	-	108	XUT1034_135333_135440_108	XUT1034	2	TRUE	TRUE	FALSE	FALSE	TRUE	FALSE	FALSE	TRUE	TRUE
chr04	135147	135209	-	63	XUT1034_135147_135209_63	XUT1034	3	TRUE	TRUE	FALSE	FALSE	FALSE	FALSE	FALSE	FALSE	FALSE
chr04	134796	134813	-	18	XUT1034_134796_134813_18	XUT1034	9	TRUE	TRUE	FALSE	FALSE	FALSE	FALSE	FALSE	FALSE	FALSE
chr04	146092	146133	+	42	XUT0137_146092_146133_42	XUT0137	4	TRUE	TRUE	FALSE	FALSE	FALSE	FALSE	FALSE	FALSE	FALSE
chr04	146551	146565	+	15	XUT0137_146551_146565_15	XUT0137	9	TRUE	TRUE	FALSE	FALSE	FALSE	FALSE	FALSE	FALSE	FALSE
chr04	147307	147324	+	18	XUT0137_147307_147324_18	XUT0137	15	TRUE	TRUE	FALSE	FALSE	FALSE	FALSE	FALSE	FALSE	FALSE
chr04	147514	147537	+	24	XUT0137_147514_147537_24	XUT0137	17	TRUE	TRUE	FALSE	FALSE	FALSE	FALSE	FALSE	FALSE	FALSE
chr04	145775	145804	+	30	XUT0137_145775_145804_30	XUT0137	1	TRUE	TRUE	FALSE	FALSE	FALSE	FALSE	FALSE	FALSE	FALSE
chr04	146096	146230	+	135	XUT0137_146096_146230_135	XUT0137	5	TRUE	TRUE	TRUE	FALSE	FALSE	FALSE	FALSE	FALSE	FALSE
chr04	146519	146647	+	129	XUT0137_146519_146647_129	XUT0137	8	TRUE	TRUE	FALSE	FALSE	FALSE	FALSE	FALSE	FALSE	FALSE
chr04	147161	147181	+	21	XUT0137_147161_147181_21	XUT0137	13	TRUE	TRUE	FALSE	FALSE	FALSE	FALSE	FALSE	FALSE	FALSE
chr04	147185	147298	+	114	XUT0137_147185_147298_114	XUT0137	14	TRUE	TRUE	FALSE	FALSE	FALSE	FALSE	FALSE	FALSE	FALSE
chr04	145884	146081	+	198	XUT0137_145884_146081_198	XUT0137	2	TRUE	TRUE	TRUE	FALSE	FALSE	FALSE	TRUE	TRUE	FALSE
chr04	146088	146117	+	30	XUT0137_146088_146117_30	XUT0137	3	TRUE	TRUE	FALSE	FALSE	FALSE	FALSE	FALSE	FALSE	FALSE
chr04	146127	146171	+	45	XUT0137_146127_146171_45	XUT0137	6	TRUE	TRUE	FALSE	FALSE	FALSE	FALSE	FALSE	FALSE	FALSE
chr04	146391	146519	+	129	XUT0137_146391_146519_129	XUT0137	7	TRUE	TRUE	FALSE	FALSE	FALSE	FALSE	FALSE	FALSE	FALSE
chr04	146730	146786	+	57	XUT0137_146730_146786_57	XUT0137	10	TRUE	TRUE	FALSE	FALSE	FALSE	FALSE	FALSE	FALSE	FALSE
chr04	146823	146888	+	66	XUT0137_146823_146888_66	XUT0137	11	TRUE	TRUE	FALSE	FALSE	FALSE	FALSE	FALSE	FALSE	FALSE
chr04	146931	147077	+	147	XUT0137_146931_147077_147	XUT0137	12	TRUE	TRUE	FALSE	FALSE	FALSE	FALSE	FALSE	FALSE	FALSE
chr04	147444	147509	+	66	XUT0137_147444_147509_66	XUT0137	16	TRUE	TRUE	FALSE	FALSE	FALSE	FALSE	FALSE	FALSE	FALSE
chr04	147621	147635	+	15	XUT0137_147621_147635_15	XUT0137	18	TRUE	TRUE	FALSE	FALSE	FALSE	FALSE	FALSE	FALSE	FALSE
chr04	198804	199079	+	276	XUT0140_198804_199079_276	XUT0140	2	FALSE	TRUE	FALSE	FALSE	FALSE	FALSE	FALSE	FALSE	FALSE
chr04	198652	198759	+	108	XUT0140_198652_198759_108	XUT0140	1	FALSE	TRUE	TRUE	FALSE	FALSE	FALSE	FALSE	FALSE	FALSE
chr04	216774	216929	-	156	XUT1036_216774_216929_156	XUT1036	2	TRUE	TRUE	FALSE	FALSE	FALSE	FALSE	FALSE	FALSE	FALSE
chr04	216519	216710	-	192	XUT1036_216519_216710_192	XUT1036	3	TRUE	TRUE	FALSE	FALSE	TRUE	FALSE	TRUE	TRUE	TRUE
chr04	215916	215990	-	75	XUT1036_215916_215990_75	XUT1036	8	TRUE	TRUE	TRUE	FALSE	FALSE	FALSE	FALSE	FALSE	FALSE
chr04	215730	215750	-	21	XUT1036_215730_215750_21	XUT1036	10	TRUE	TRUE	FALSE	FALSE	FALSE	FALSE	FALSE	FALSE	FALSE
chr04	215304	215333	-	30	XUT1036_215304_215333_30	XUT1036	15	TRUE	TRUE	FALSE	FALSE	FALSE	FALSE	FALSE	FALSE	FALSE
chr04	215106	215243	-	138	XUT1036_215106_215243_138	XUT1036	18	TRUE	TRUE	FALSE	FALSE	FALSE	FALSE	FALSE	FALSE	FALSE
chr04	214089	214121	-	33	XUT1036_214089_214121_33	XUT1036	28	TRUE	TRUE	FALSE	FALSE	FALSE	FALSE	FALSE	FALSE	FALSE
chr04	213612	213761	-	150	XUT1036_213612_213761_150	XUT1036	35	TRUE	TRUE	FALSE	FALSE	FALSE	FALSE	FALSE	FALSE	FALSE
chr04	213375	213455	-	81	XUT1036_213375_213455_81	XUT1036	39	TRUE	TRUE	FALSE	FALSE	FALSE	FALSE	FALSE	FALSE	FALSE
chr04	213066	213173	-	108	XUT1036_213066_213173_108	XUT1036	42	TRUE	TRUE	FALSE	FALSE	FALSE	FALSE	FALSE	FALSE	FALSE
chr04	212685	212729	-	45	XUT1036_212685_212729_45	XUT1036	49	TRUE	TRUE	FALSE	FALSE	FALSE	FALSE	FALSE	FALSE	FALSE
chr04	217079	217102	-	24	XUT1036_217079_217102_24	XUT1036	1	TRUE	TRUE	TRUE	TRUE	TRUE	TRUE	TRUE	TRUE	TRUE
chr04	216458	216475	-	18	XUT1036_216458_216475_18	XUT1036	4	TRUE	TRUE	FALSE	FALSE	FALSE	FALSE	FALSE	FALSE	FALSE
chr04	216095	216175	-	81	XUT1036_216095_216175_81	XUT1036	6	TRUE	TRUE	TRUE	FALSE	TRUE	FALSE	FALSE	TRUE	FALSE
chr04	215705	215779	-	75	XUT1036_215705_215779_75	XUT1036	9	TRUE	TRUE	FALSE	FALSE	FALSE	FALSE	FALSE	FALSE	FALSE
chr04	215348	215407	-	60	XUT1036_215348_215407_60	XUT1036	13	TRUE	TRUE	FALSE	FALSE	FALSE	FALSE	FALSE	FALSE	FALSE
chr04	215243	215287	-	45	XUT1036_215243_215287_45	XUT1036	17	TRUE	TRUE	FALSE	FALSE	FALSE	FALSE	FALSE	FALSE	FALSE
chr04	214985	215194	-	210	XUT1036_214985_215194_210	XUT1036	19	TRUE	TRUE	FALSE	FALSE	FALSE	FALSE	FALSE	FALSE	FALSE
chr04	214880	214933	-	54	XUT1036_214880_214933_54	XUT1036	20	TRUE	TRUE	FALSE	FALSE	FALSE	FALSE	FALSE	FALSE	FALSE
chr04	214550	214825	-	276	XUT1036_214550_214825_276	XUT1036	21	TRUE	TRUE	TRUE	FALSE	FALSE	FALSE	FALSE	FALSE	FALSE
chr04	214346	214441	-	96	XUT1036_214346_214441_96	XUT1036	24	TRUE	TRUE	FALSE	FALSE	FALSE	FALSE	FALSE	FALSE	FALSE
chr04	214121	214198	-	78	XUT1036_214121_214198_78	XUT1036	26	TRUE	TRUE	FALSE	FALSE	FALSE	FALSE	FALSE	FALSE	FALSE
chr04	214016	214054	-	39	XUT1036_214016_214054_39	XUT1036	29	TRUE	TRUE	FALSE	FALSE	FALSE	FALSE	FALSE	FALSE	FALSE
chr04	213845	213907	-	63	XUT1036_213845_213907_63	XUT1036	31	TRUE	TRUE	FALSE	FALSE	FALSE	FALSE	FALSE	FALSE	FALSE
chr04	213746	213790	-	45	XUT1036_213746_213790_45	XUT1036	33	TRUE	TRUE	FALSE	FALSE	FALSE	FALSE	FALSE	FALSE	FALSE
chr04	213557	213661	-	105	XUT1036_213557_213661_105	XUT1036	36	TRUE	TRUE	FALSE	FALSE	FALSE	FALSE	FALSE	FALSE	FALSE
chr04	213455	213517	-	63	XUT1036_213455_213517_63	XUT1036	37	TRUE	TRUE	FALSE	FALSE	FALSE	FALSE	FALSE	FALSE	FALSE
chr04	213155	213208	-	54	XUT1036_213155_213208_54	XUT1036	41	TRUE	TRUE	FALSE	FALSE	FALSE	FALSE	FALSE	FALSE	FALSE
chr04	213056	213124	-	69	XUT1036_213056_213124_69	XUT1036	44	TRUE	TRUE	FALSE	FALSE	FALSE	FALSE	FALSE	FALSE	FALSE
chr04	212915	212965	-	51	XUT1036_212915_212965_51	XUT1036	45	TRUE	TRUE	FALSE	FALSE	FALSE	FALSE	FALSE	FALSE	FALSE
chr04	212894	212908	-	15	XUT1036_212894_212908_15	XUT1036	46	TRUE	TRUE	FALSE	FALSE	FALSE	FALSE	FALSE	FALSE	FALSE
chr04	212705	212827	-	123	XUT1036_212705_212827_123	XUT1036	47	TRUE	TRUE	FALSE	FALSE	FALSE	FALSE	FALSE	FALSE	FALSE
chr04	216328	216393	-	66	XUT1036_216328_216393_66	XUT1036	5	TRUE	TRUE	FALSE	FALSE	FALSE	FALSE	FALSE	FALSE	FALSE
chr04	215881	216072	-	192	XUT1036_215881_216072_192	XUT1036	7	TRUE	TRUE	FALSE	FALSE	FALSE	FALSE	FALSE	FALSE	FALSE
chr04	215611	215733	-	123	XUT1036_215611_215733_123	XUT1036	11	TRUE	TRUE	FALSE	FALSE	TRUE	FALSE	TRUE	TRUE	TRUE
chr04	215533	215559	-	27	XUT1036_215533_215559_27	XUT1036	12	TRUE	TRUE	FALSE	FALSE	FALSE	FALSE	FALSE	FALSE	FALSE
chr04	215320	215382	-	63	XUT1036_215320_215382_63	XUT1036	14	TRUE	TRUE	FALSE	FALSE	FALSE	FALSE	FALSE	FALSE	FALSE
chr04	215287	215307	-	21	XUT1036_215287_215307_21	XUT1036	16	TRUE	TRUE	FALSE	FALSE	FALSE	FALSE	FALSE	FALSE	FALSE
chr04	214735	214755	-	21	XUT1036_214735_214755_21	XUT1036	22	TRUE	TRUE	FALSE	FALSE	FALSE	FALSE	FALSE	FALSE	FALSE
chr04	214429	214461	-	33	XUT1036_214429_214461_33	XUT1036	23	TRUE	TRUE	FALSE	FALSE	FALSE	FALSE	FALSE	FALSE	FALSE
chr04	214249	214353	-	105	XUT1036_214249_214353_105	XUT1036	25	TRUE	TRUE	FALSE	FALSE	FALSE	FALSE	FALSE	FALSE	FALSE
chr04	214081	214143	-	63	XUT1036_214081_214143_63	XUT1036	27	TRUE	TRUE	FALSE	FALSE	FALSE	FALSE	FALSE	FALSE	FALSE
chr04	213898	213930	-	33	XUT1036_213898_213930_33	XUT1036	30	TRUE	TRUE	FALSE	FALSE	FALSE	FALSE	FALSE	FALSE	FALSE
chr04	213778	213858	-	81	XUT1036_213778_213858_81	XUT1036	32	TRUE	TRUE	FALSE	FALSE	FALSE	FALSE	FALSE	FALSE	FALSE
chr04	213739	213765	-	27	XUT1036_213739_213765_27	XUT1036	34	TRUE	TRUE	FALSE	FALSE	FALSE	FALSE	FALSE	FALSE	FALSE
chr04	213283	213480	-	198	XUT1036_213283_213480_198	XUT1036	38	TRUE	TRUE	FALSE	FALSE	FALSE	FALSE	FALSE	FALSE	FALSE
chr04	213160	213219	-	60	XUT1036_213160_213219_60	XUT1036	40	TRUE	TRUE	FALSE	FALSE	FALSE	FALSE	FALSE	FALSE	FALSE
chr04	213040	213135	-	96	XUT1036_213040_213135_96	XUT1036	43	TRUE	TRUE	FALSE	FALSE	FALSE	FALSE	FALSE	FALSE	FALSE
chr04	212773	212814	-	42	XUT1036_212773_212814_42	XUT1036	48	TRUE	TRUE	FALSE	FALSE	FALSE	FALSE	FALSE	FALSE	FALSE
chr04	219470	219535	+	66	XUT0141_219470_219535_66	XUT0141	2	FALSE	TRUE	FALSE	FALSE	FALSE	FALSE	FALSE	FALSE	FALSE
chr04	219650	219664	+	15	XUT0141_219650_219664_15	XUT0141	5	FALSE	TRUE	FALSE	FALSE	FALSE	FALSE	FALSE	FALSE	FALSE
chr04	219378	219404	+	27	XUT0141_219378_219404_27	XUT0141	1	FALSE	TRUE	FALSE	FALSE	FALSE	FALSE	FALSE	FALSE	FALSE
chr04	219600	219638	+	39	XUT0141_219600_219638_39	XUT0141	3	FALSE	TRUE	TRUE	FALSE	TRUE	FALSE	FALSE	TRUE	FALSE
chr04	219642	219671	+	30	XUT0141_219642_219671_30	XUT0141	4	FALSE	TRUE	FALSE	FALSE	FALSE	FALSE	FALSE	FALSE	FALSE
chr04	221101	221142	+	42	XUT0142_221101_221142_42	XUT0142	1	FALSE	TRUE	TRUE	FALSE	TRUE	FALSE	FALSE	TRUE	TRUE
chr04	222194	222253	-	60	XUT1037_222194_222253_60	XUT1037	1	FALSE	TRUE	TRUE	FALSE	FALSE	FALSE	FALSE	FALSE	FALSE
chr04	222104	222175	-	72	XUT1037_222104_222175_72	XUT1037	2	FALSE	TRUE	FALSE	FALSE	FALSE	FALSE	FALSE	FALSE	FALSE
chr04	234384	234416	-	33	XUT1038_234384_234416_33	XUT1038	1	TRUE	TRUE	FALSE	FALSE	FALSE	FALSE	FALSE	FALSE	FALSE
chr04	234165	234233	-	69	XUT1038_234165_234233_69	XUT1038	4	TRUE	TRUE	FALSE	FALSE	TRUE	FALSE	FALSE	TRUE	TRUE
chr04	233811	233834	-	24	XUT1038_233811_233834_24	XUT1038	8	TRUE	TRUE	FALSE	FALSE	FALSE	FALSE	FALSE	FALSE	FALSE
chr04	233115	233165	-	51	XUT1038_233115_233165_51	XUT1038	15	TRUE	TRUE	FALSE	FALSE	FALSE	FALSE	FALSE	FALSE	FALSE
chr04	233079	233111	-	33	XUT1038_233079_233111_33	XUT1038	17	TRUE	TRUE	FALSE	FALSE	FALSE	FALSE	FALSE	FALSE	FALSE
chr04	232665	232841	-	177	XUT1038_232665_232841_177	XUT1038	20	TRUE	TRUE	FALSE	FALSE	FALSE	FALSE	FALSE	FALSE	FALSE
chr04	232584	232616	-	33	XUT1038_232584_232616_33	XUT1038	23	TRUE	TRUE	FALSE	FALSE	FALSE	FALSE	FALSE	FALSE	FALSE
chr04	232338	232388	-	51	XUT1038_232338_232388_51	XUT1038	26	TRUE	TRUE	FALSE	FALSE	FALSE	FALSE	FALSE	FALSE	FALSE
chr04	232014	232085	-	72	XUT1038_232014_232085_72	XUT1038	27	TRUE	TRUE	TRUE	FALSE	FALSE	FALSE	FALSE	FALSE	FALSE
chr04	231930	231947	-	18	XUT1038_231930_231947_18	XUT1038	29	TRUE	TRUE	FALSE	FALSE	FALSE	FALSE	FALSE	FALSE	FALSE
chr04	231783	231863	-	81	XUT1038_231783_231863_81	XUT1038	30	TRUE	TRUE	FALSE	FALSE	FALSE	FALSE	FALSE	FALSE	FALSE
chr04	234287	234346	-	60	XUT1038_234287_234346_60	XUT1038	2	TRUE	TRUE	TRUE	FALSE	FALSE	FALSE	FALSE	FALSE	FALSE
chr04	234038	234130	-	93	XUT1038_234038_234130_93	XUT1038	5	TRUE	TRUE	TRUE	FALSE	FALSE	FALSE	FALSE	FALSE	FALSE
chr04	233987	234019	-	33	XUT1038_233987_234019_33	XUT1038	6	TRUE	TRUE	TRUE	FALSE	FALSE	TRUE	TRUE	TRUE	TRUE
chr04	233504	233560	-	57	XUT1038_233504_233560_57	XUT1038	11	TRUE	TRUE	FALSE	FALSE	FALSE	FALSE	FALSE	FALSE	FALSE
chr04	233309	233386	-	78	XUT1038_233309_233386_78	XUT1038	12	TRUE	TRUE	FALSE	FALSE	FALSE	FALSE	FALSE	FALSE	FALSE
chr04	232676	232693	-	18	XUT1038_232676_232693_18	XUT1038	21	TRUE	TRUE	FALSE	FALSE	FALSE	FALSE	FALSE	FALSE	FALSE
chr04	232571	232612	-	42	XUT1038_232571_232612_42	XUT1038	24	TRUE	TRUE	FALSE	FALSE	FALSE	FALSE	FALSE	FALSE	FALSE
chr04	231947	231964	-	18	XUT1038_231947_231964_18	XUT1038	28	TRUE	TRUE	FALSE	FALSE	FALSE	FALSE	FALSE	FALSE	FALSE
chr04	231245	231355	-	111	XUT1038_231245_231355_111	XUT1038	33	TRUE	TRUE	FALSE	FALSE	FALSE	FALSE	FALSE	FALSE	FALSE
chr04	231059	231106	-	48	XUT1038_231059_231106_48	XUT1038	34	TRUE	TRUE	FALSE	FALSE	FALSE	FALSE	FALSE	FALSE	FALSE
chr04	230993	231013	-	21	XUT1038_230993_231013_21	XUT1038	35	TRUE	TRUE	FALSE	FALSE	FALSE	FALSE	FALSE	FALSE	FALSE
chr04	234229	234270	-	42	XUT1038_234229_234270_42	XUT1038	3	TRUE	TRUE	TRUE	FALSE	FALSE	FALSE	FALSE	FALSE	FALSE
chr04	233845	233916	-	72	XUT1038_233845_233916_72	XUT1038	7	TRUE	TRUE	TRUE	FALSE	TRUE	TRUE	TRUE	TRUE	TRUE
chr04	233758	233799	-	42	XUT1038_233758_233799_42	XUT1038	9	TRUE	TRUE	FALSE	FALSE	FALSE	FALSE	FALSE	FALSE	FALSE
chr04	233389	233661	-	273	XUT1038_233389_233661_273	XUT1038	10	TRUE	TRUE	FALSE	FALSE	FALSE	TRUE	TRUE	TRUE	TRUE
chr04	233320	233370	-	51	XUT1038_233320_233370_51	XUT1038	13	TRUE	TRUE	FALSE	FALSE	FALSE	FALSE	FALSE	FALSE	FALSE
chr04	233206	233277	-	72	XUT1038_233206_233277_72	XUT1038	14	TRUE	TRUE	TRUE	FALSE	FALSE	TRUE	FALSE	TRUE	FALSE
chr04	233131	233154	-	24	XUT1038_233131_233154_24	XUT1038	16	TRUE	TRUE	FALSE	FALSE	FALSE	FALSE	FALSE	FALSE	FALSE
chr04	233005	233079	-	75	XUT1038_233005_233079_75	XUT1038	18	TRUE	TRUE	FALSE	FALSE	FALSE	FALSE	FALSE	FALSE	FALSE
chr04	232831	232986	-	156	XUT1038_232831_232986_156	XUT1038	19	TRUE	TRUE	TRUE	FALSE	FALSE	TRUE	FALSE	TRUE	FALSE
chr04	232612	232644	-	33	XUT1038_232612_232644_33	XUT1038	22	TRUE	TRUE	FALSE	FALSE	FALSE	FALSE	FALSE	FALSE	FALSE
chr04	232462	232521	-	60	XUT1038_232462_232521_60	XUT1038	25	TRUE	TRUE	FALSE	FALSE	FALSE	FALSE	FALSE	FALSE	FALSE
chr04	231619	231774	-	156	XUT1038_231619_231774_156	XUT1038	31	TRUE	TRUE	FALSE	FALSE	FALSE	FALSE	FALSE	FALSE	FALSE
chr04	231370	231603	-	234	XUT1038_231370_231603_234	XUT1038	32	TRUE	TRUE	FALSE	FALSE	FALSE	FALSE	FALSE	FALSE	FALSE
chr04	235417	235524	-	108	XUT1039_235417_235524_108	XUT1039	1	TRUE	TRUE	FALSE	FALSE	FALSE	FALSE	FALSE	FALSE	FALSE
chr04	235387	235401	-	15	XUT1039_235387_235401_15	XUT1039	4	TRUE	TRUE	FALSE	FALSE	FALSE	FALSE	FALSE	FALSE	FALSE
chr04	235027	235056	-	30	XUT1039_235027_235056_30	XUT1039	9	TRUE	TRUE	FALSE	FALSE	FALSE	FALSE	FALSE	FALSE	FALSE
chr04	234976	234999	-	24	XUT1039_234976_234999_24	XUT1039	10	TRUE	TRUE	FALSE	FALSE	FALSE	FALSE	FALSE	FALSE	FALSE
chr04	235383	235514	-	132	XUT1039_235383_235514_132	XUT1039	2	TRUE	TRUE	FALSE	FALSE	FALSE	FALSE	FALSE	FALSE	FALSE
chr04	235164	235205	-	42	XUT1039_235164_235205_42	XUT1039	6	TRUE	TRUE	FALSE	FALSE	FALSE	FALSE	FALSE	FALSE	FALSE
chr04	234996	235103	-	108	XUT1039_234996_235103_108	XUT1039	7	TRUE	TRUE	FALSE	FALSE	FALSE	FALSE	FALSE	FALSE	FALSE
chr04	235478	235507	-	30	XUT1039_235478_235507_30	XUT1039	3	TRUE	TRUE	FALSE	FALSE	FALSE	FALSE	FALSE	FALSE	FALSE
chr04	235184	235366	-	183	XUT1039_235184_235366_183	XUT1039	5	TRUE	TRUE	FALSE	FALSE	FALSE	FALSE	FALSE	FALSE	FALSE
chr04	234938	235084	-	147	XUT1039_234938_235084_147	XUT1039	8	TRUE	TRUE	FALSE	FALSE	FALSE	FALSE	FALSE	FALSE	FALSE
chr04	238912	238938	+	27	XUT0143_238912_238938_27	XUT0143	1	TRUE	TRUE	TRUE	FALSE	FALSE	FALSE	FALSE	FALSE	FALSE
chr04	238942	238992	+	51	XUT0143_238942_238992_51	XUT0143	3	TRUE	TRUE	FALSE	FALSE	FALSE	FALSE	FALSE	FALSE	FALSE
chr04	239275	239319	+	45	XUT0143_239275_239319_45	XUT0143	6	TRUE	TRUE	FALSE	FALSE	FALSE	FALSE	FALSE	FALSE	FALSE
chr04	239341	239406	+	66	XUT0143_239341_239406_66	XUT0143	8	TRUE	TRUE	FALSE	FALSE	FALSE	FALSE	FALSE	FALSE	FALSE
chr04	239009	239131	+	123	XUT0143_239009_239131_123	XUT0143	4	TRUE	TRUE	TRUE	FALSE	FALSE	TRUE	TRUE	TRUE	TRUE
chr04	239387	239512	+	126	XUT0143_239387_239512_126	XUT0143	9	TRUE	TRUE	FALSE	FALSE	FALSE	FALSE	FALSE	FALSE	FALSE
chr04	238938	239033	+	96	XUT0143_238938_239033_96	XUT0143	2	TRUE	TRUE	FALSE	FALSE	TRUE	TRUE	TRUE	TRUE	TRUE
chr04	239142	239312	+	171	XUT0143_239142_239312_171	XUT0143	5	TRUE	TRUE	TRUE	FALSE	FALSE	FALSE	FALSE	FALSE	FALSE
chr04	239319	239501	+	183	XUT0143_239319_239501_183	XUT0143	7	TRUE	TRUE	FALSE	FALSE	FALSE	FALSE	FALSE	FALSE	FALSE
chr04	240603	240683	-	81	XUT1040_240603_240683_81	XUT1040	4	TRUE	TRUE	FALSE	FALSE	FALSE	FALSE	FALSE	FALSE	FALSE
chr04	240402	240422	-	21	XUT1040_240402_240422_21	XUT1040	7	TRUE	TRUE	FALSE	FALSE	FALSE	FALSE	FALSE	FALSE	FALSE
chr04	240270	240323	-	54	XUT1040_240270_240323_54	XUT1040	8	TRUE	TRUE	FALSE	FALSE	FALSE	FALSE	FALSE	FALSE	FALSE
chr04	240806	240877	-	72	XUT1040_240806_240877_72	XUT1040	2	TRUE	TRUE	FALSE	FALSE	FALSE	FALSE	FALSE	FALSE	FALSE
chr04	240542	240631	-	90	XUT1040_240542_240631_90	XUT1040	5	TRUE	TRUE	FALSE	FALSE	FALSE	FALSE	FALSE	FALSE	FALSE
chr04	240425	240457	-	33	XUT1040_240425_240457_33	XUT1040	6	TRUE	TRUE	FALSE	FALSE	FALSE	FALSE	FALSE	FALSE	FALSE
chr04	240185	240265	-	81	XUT1040_240185_240265_81	XUT1040	9	TRUE	TRUE	FALSE	FALSE	FALSE	FALSE	FALSE	FALSE	FALSE
chr04	241072	241131	-	60	XUT1040_241072_241131_60	XUT1040	1	TRUE	TRUE	TRUE	FALSE	FALSE	FALSE	FALSE	FALSE	FALSE
chr04	240703	240858	-	156	XUT1040_240703_240858_156	XUT1040	3	TRUE	TRUE	FALSE	FALSE	FALSE	FALSE	FALSE	FALSE	FALSE
chr04	241941	242060	-	120	XUT1041_241941_242060_120	XUT1041	1	TRUE	TRUE	FALSE	FALSE	TRUE	TRUE	TRUE	TRUE	TRUE
chr04	241740	241838	-	99	XUT1041_241740_241838_99	XUT1041	3	TRUE	TRUE	FALSE	FALSE	FALSE	FALSE	FALSE	FALSE	FALSE
chr04	241458	241586	-	129	XUT1041_241458_241586_129	XUT1041	5	TRUE	TRUE	FALSE	FALSE	FALSE	FALSE	FALSE	FALSE	FALSE
chr04	241347	241367	-	21	XUT1041_241347_241367_21	XUT1041	7	TRUE	TRUE	FALSE	FALSE	FALSE	FALSE	FALSE	FALSE	FALSE
chr04	241248	241304	-	57	XUT1041_241248_241304_57	XUT1041	8	TRUE	TRUE	FALSE	FALSE	FALSE	FALSE	FALSE	FALSE	FALSE
chr04	241961	241975	-	15	XUT1041_241961_241975_15	XUT1041	2	TRUE	TRUE	FALSE	FALSE	FALSE	FALSE	FALSE	FALSE	FALSE
chr04	241775	241792	-	18	XUT1041_241775_241792_18	XUT1041	4	TRUE	TRUE	FALSE	FALSE	FALSE	FALSE	FALSE	FALSE	FALSE
chr04	241282	241419	-	138	XUT1041_241282_241419_138	XUT1041	6	TRUE	TRUE	FALSE	FALSE	FALSE	FALSE	FALSE	FALSE	FALSE
chr04	251127	251288	-	162	XUT1042_251127_251288_162	XUT1042	1	TRUE	TRUE	FALSE	FALSE	FALSE	FALSE	FALSE	FALSE	FALSE
chr04	250920	250937	-	18	XUT1042_250920_250937_18	XUT1042	4	TRUE	TRUE	FALSE	FALSE	FALSE	FALSE	FALSE	FALSE	FALSE
chr04	251261	251281	-	21	XUT1042_251261_251281_21	XUT1042	2	TRUE	TRUE	FALSE	FALSE	FALSE	FALSE	FALSE	FALSE	FALSE
chr04	250898	250984	-	87	XUT1042_250898_250984_87	XUT1042	3	TRUE	TRUE	FALSE	FALSE	FALSE	FALSE	FALSE	FALSE	FALSE
chr04	250745	250855	-	111	XUT1042_250745_250855_111	XUT1042	5	TRUE	TRUE	FALSE	FALSE	FALSE	FALSE	FALSE	FALSE	FALSE
chr04	250795	250833	-	39	XUT1042_250795_250833_39	XUT1042	6	TRUE	TRUE	FALSE	FALSE	FALSE	FALSE	FALSE	FALSE	FALSE
chr04	264419	264550	+	132	XUT0144_264419_264550_132	XUT0144	1	FALSE	TRUE	FALSE	FALSE	FALSE	TRUE	FALSE	TRUE	FALSE
chr04	264623	264685	+	63	XUT0144_264623_264685_63	XUT0144	3	FALSE	TRUE	FALSE	FALSE	FALSE	FALSE	FALSE	FALSE	FALSE
chr04	264516	264677	+	162	XUT0144_264516_264677_162	XUT0144	2	FALSE	TRUE	FALSE	FALSE	FALSE	FALSE	TRUE	TRUE	TRUE
chr04	264658	264705	+	48	XUT0144_264658_264705_48	XUT0144	4	FALSE	TRUE	FALSE	FALSE	FALSE	FALSE	FALSE	FALSE	FALSE
chr04	267856	267993	-	138	XUT1043_267856_267993_138	XUT1043	1	TRUE	TRUE	TRUE	FALSE	TRUE	FALSE	FALSE	TRUE	FALSE
chr04	267929	267967	-	39	XUT1043_267929_267967_39	XUT1043	2	TRUE	TRUE	FALSE	FALSE	FALSE	FALSE	FALSE	FALSE	FALSE
chr04	269087	269104	-	18	XUT1044_269087_269104_18	XUT1044	2	TRUE	TRUE	FALSE	FALSE	FALSE	FALSE	FALSE	FALSE	FALSE
chr04	269026	269046	-	21	XUT1044_269026_269046_21	XUT1044	3	TRUE	TRUE	FALSE	FALSE	FALSE	FALSE	FALSE	FALSE	FALSE
chr04	268417	268548	-	132	XUT1044_268417_268548_132	XUT1044	6	TRUE	TRUE	FALSE	FALSE	FALSE	FALSE	FALSE	FALSE	FALSE
chr04	269124	269141	-	18	XUT1044_269124_269141_18	XUT1044	1	TRUE	TRUE	FALSE	FALSE	FALSE	FALSE	FALSE	FALSE	FALSE
chr04	268806	268820	-	15	XUT1044_268806_268820_15	XUT1044	4	TRUE	TRUE	FALSE	FALSE	FALSE	FALSE	FALSE	FALSE	FALSE
chr04	268710	268757	-	48	XUT1044_268710_268757_48	XUT1044	5	TRUE	TRUE	FALSE	FALSE	FALSE	FALSE	FALSE	FALSE	FALSE
chr04	269505	269654	-	150	XUT1045_269505_269654_150	XUT1045	2	TRUE	TRUE	TRUE	FALSE	FALSE	FALSE	FALSE	FALSE	FALSE
chr04	269540	269686	-	147	XUT1045_269540_269686_147	XUT1045	1	TRUE	TRUE	TRUE	FALSE	FALSE	FALSE	FALSE	FALSE	FALSE
chr04	295371	295400	+	30	XUT0145_295371_295400_30	XUT0145	5	TRUE	TRUE	FALSE	FALSE	FALSE	FALSE	FALSE	FALSE	FALSE
chr04	295132	295161	+	30	XUT0145_295132_295161_30	XUT0145	2	TRUE	TRUE	FALSE	FALSE	FALSE	FALSE	FALSE	FALSE	FALSE
chr04	295198	295338	+	141	XUT0145_295198_295338_141	XUT0145	4	TRUE	TRUE	FALSE	FALSE	FALSE	FALSE	FALSE	FALSE	FALSE
chr04	295028	295048	+	21	XUT0145_295028_295048_21	XUT0145	1	TRUE	TRUE	FALSE	FALSE	FALSE	FALSE	FALSE	FALSE	FALSE
chr04	295169	295198	+	30	XUT0145_295169_295198_30	XUT0145	3	TRUE	TRUE	FALSE	FALSE	FALSE	FALSE	FALSE	FALSE	FALSE
chr04	310607	310654	+	48	XUT0146_310607_310654_48	XUT0146	2	FALSE	TRUE	FALSE	FALSE	FALSE	FALSE	FALSE	FALSE	FALSE
chr04	310856	310897	+	42	XUT0146_310856_310897_42	XUT0146	3	FALSE	TRUE	FALSE	FALSE	FALSE	FALSE	FALSE	FALSE	FALSE
chr04	310573	310620	+	48	XUT0146_310573_310620_48	XUT0146	1	FALSE	TRUE	FALSE	FALSE	FALSE	FALSE	FALSE	FALSE	FALSE
chr04	312625	312681	+	57	XUT0147_312625_312681_57	XUT0147	3	TRUE	TRUE	FALSE	FALSE	FALSE	FALSE	FALSE	FALSE	FALSE
chr04	313000	313083	+	84	XUT0147_313000_313083_84	XUT0147	9	TRUE	TRUE	TRUE	FALSE	FALSE	TRUE	TRUE	TRUE	TRUE
chr04	313237	313269	+	33	XUT0147_313237_313269_33	XUT0147	10	TRUE	TRUE	FALSE	FALSE	FALSE	FALSE	FALSE	FALSE	FALSE
chr04	313309	313338	+	30	XUT0147_313309_313338_30	XUT0147	12	TRUE	TRUE	FALSE	FALSE	FALSE	FALSE	FALSE	FALSE	FALSE
chr04	313393	313431	+	39	XUT0147_313393_313431_39	XUT0147	13	TRUE	TRUE	FALSE	FALSE	FALSE	FALSE	FALSE	FALSE	FALSE
chr04	313450	313467	+	18	XUT0147_313450_313467_18	XUT0147	14	TRUE	TRUE	FALSE	FALSE	FALSE	FALSE	FALSE	FALSE	FALSE
chr04	313972	313989	+	18	XUT0147_313972_313989_18	XUT0147	19	TRUE	TRUE	FALSE	FALSE	FALSE	FALSE	FALSE	FALSE	FALSE
chr04	314053	314091	+	39	XUT0147_314053_314091_39	XUT0147	20	TRUE	TRUE	FALSE	FALSE	FALSE	FALSE	FALSE	FALSE	FALSE
chr04	314101	314136	+	36	XUT0147_314101_314136_36	XUT0147	22	TRUE	TRUE	FALSE	FALSE	FALSE	FALSE	FALSE	FALSE	FALSE
chr04	312479	312625	+	147	XUT0147_312479_312625_147	XUT0147	1	TRUE	TRUE	FALSE	FALSE	FALSE	FALSE	TRUE	TRUE	TRUE
chr04	312821	312925	+	105	XUT0147_312821_312925_105	XUT0147	6	TRUE	TRUE	FALSE	FALSE	TRUE	TRUE	TRUE	TRUE	TRUE
chr04	312941	313216	+	276	XUT0147_312941_313216_276	XUT0147	7	TRUE	TRUE	TRUE	FALSE	FALSE	FALSE	TRUE	TRUE	TRUE
chr04	313934	313960	+	27	XUT0147_313934_313960_27	XUT0147	17	TRUE	TRUE	FALSE	FALSE	FALSE	FALSE	FALSE	FALSE	FALSE
chr04	314084	314170	+	87	XUT0147_314084_314170_87	XUT0147	21	TRUE	TRUE	FALSE	FALSE	FALSE	FALSE	FALSE	FALSE	FALSE
chr04	312504	312566	+	63	XUT0147_312504_312566_63	XUT0147	2	TRUE	TRUE	FALSE	FALSE	TRUE	FALSE	FALSE	TRUE	FALSE
chr04	312648	312707	+	60	XUT0147_312648_312707_60	XUT0147	4	TRUE	TRUE	FALSE	FALSE	FALSE	FALSE	FALSE	FALSE	FALSE
chr04	312750	312773	+	24	XUT0147_312750_312773_24	XUT0147	5	TRUE	TRUE	FALSE	FALSE	FALSE	FALSE	FALSE	FALSE	FALSE
chr04	312981	313124	+	144	XUT0147_312981_313124_144	XUT0147	8	TRUE	TRUE	TRUE	FALSE	FALSE	FALSE	TRUE	TRUE	TRUE
chr04	313260	313286	+	27	XUT0147_313260_313286_27	XUT0147	11	TRUE	TRUE	FALSE	FALSE	FALSE	FALSE	FALSE	FALSE	FALSE
chr04	313701	313718	+	18	XUT0147_313701_313718_18	XUT0147	15	TRUE	TRUE	FALSE	FALSE	FALSE	FALSE	FALSE	FALSE	FALSE
chr04	313815	313868	+	54	XUT0147_313815_313868_54	XUT0147	16	TRUE	TRUE	FALSE	FALSE	FALSE	FALSE	FALSE	FALSE	FALSE
chr04	313941	314045	+	105	XUT0147_313941_314045_105	XUT0147	18	TRUE	TRUE	FALSE	FALSE	FALSE	FALSE	FALSE	FALSE	FALSE
chr04	314109	314126	+	18	XUT0147_314109_314126_18	XUT0147	23	TRUE	TRUE	FALSE	FALSE	FALSE	FALSE	FALSE	FALSE	FALSE
chr04	316643	316696	+	54	XUT0148_316643_316696_54	XUT0148	1	FALSE	TRUE	TRUE	FALSE	TRUE	FALSE	TRUE	TRUE	TRUE
chr04	316766	316807	+	42	XUT0148_316766_316807_42	XUT0148	2	FALSE	TRUE	FALSE	FALSE	FALSE	FALSE	FALSE	FALSE	FALSE
chr04	320456	320506	+	51	XUT0149_320456_320506_51	XUT0149	3	TRUE	TRUE	TRUE	FALSE	TRUE	FALSE	TRUE	TRUE	FALSE
chr04	320433	320456	+	24	XUT0149_320433_320456_24	XUT0149	1	TRUE	TRUE	TRUE	FALSE	FALSE	FALSE	FALSE	FALSE	FALSE
chr04	320613	320687	+	75	XUT0149_320613_320687_75	XUT0149	4	TRUE	TRUE	FALSE	FALSE	FALSE	FALSE	FALSE	FALSE	FALSE
chr04	320808	320831	+	24	XUT0149_320808_320831_24	XUT0149	6	TRUE	TRUE	FALSE	FALSE	FALSE	FALSE	FALSE	FALSE	FALSE
chr04	320967	320993	+	27	XUT0149_320967_320993_27	XUT0149	7	TRUE	TRUE	FALSE	FALSE	FALSE	FALSE	FALSE	FALSE	FALSE
chr04	320443	320472	+	30	XUT0149_320443_320472_30	XUT0149	2	TRUE	TRUE	TRUE	FALSE	TRUE	FALSE	FALSE	TRUE	FALSE
chr04	320707	320724	+	18	XUT0149_320707_320724_18	XUT0149	5	TRUE	TRUE	FALSE	FALSE	FALSE	FALSE	FALSE	FALSE	FALSE
chr04	323936	324037	+	102	XUT0150_323936_324037_102	XUT0150	1	TRUE	TRUE	TRUE	FALSE	TRUE	TRUE	TRUE	TRUE	TRUE
chr04	324155	324232	+	78	XUT0150_324155_324232_78	XUT0150	4	TRUE	TRUE	FALSE	FALSE	FALSE	FALSE	FALSE	FALSE	FALSE
chr04	324326	324373	+	48	XUT0150_324326_324373_48	XUT0150	7	TRUE	TRUE	FALSE	FALSE	FALSE	FALSE	FALSE	FALSE	FALSE
chr04	324389	324427	+	39	XUT0150_324389_324427_39	XUT0150	8	TRUE	TRUE	FALSE	FALSE	FALSE	FALSE	FALSE	FALSE	FALSE
chr04	323988	324032	+	45	XUT0150_323988_324032_45	XUT0150	2	TRUE	TRUE	TRUE	FALSE	TRUE	TRUE	TRUE	TRUE	TRUE
chr04	324177	324209	+	33	XUT0150_324177_324209_33	XUT0150	5	TRUE	TRUE	FALSE	FALSE	FALSE	FALSE	FALSE	FALSE	FALSE
chr04	324082	324096	+	15	XUT0150_324082_324096_15	XUT0150	3	TRUE	TRUE	FALSE	FALSE	FALSE	FALSE	FALSE	FALSE	FALSE
chr04	324292	324342	+	51	XUT0150_324292_324342_51	XUT0150	6	TRUE	TRUE	FALSE	FALSE	FALSE	FALSE	FALSE	FALSE	FALSE
chr04	357713	357745	+	33	XUT0151_357713_357745_33	XUT0151	1	FALSE	TRUE	FALSE	FALSE	FALSE	FALSE	FALSE	FALSE	FALSE
chr04	357917	357931	+	15	XUT0151_357917_357931_15	XUT0151	3	FALSE	TRUE	FALSE	FALSE	FALSE	FALSE	FALSE	FALSE	FALSE
chr04	357867	357938	+	72	XUT0151_357867_357938_72	XUT0151	2	FALSE	TRUE	FALSE	FALSE	FALSE	FALSE	FALSE	FALSE	FALSE
chr04	365728	365769	+	42	XUT0152_365728_365769_42	XUT0152	1	FALSE	TRUE	FALSE	FALSE	FALSE	FALSE	FALSE	FALSE	FALSE
chr04	365804	365818	+	15	XUT0152_365804_365818_15	XUT0152	2	FALSE	TRUE	FALSE	FALSE	FALSE	FALSE	FALSE	FALSE	FALSE
chr04	365850	365888	+	39	XUT0152_365850_365888_39	XUT0152	3	FALSE	TRUE	FALSE	FALSE	FALSE	FALSE	FALSE	FALSE	FALSE
chr04	367444	367476	+	33	XUT0153_367444_367476_33	XUT0153	2	TRUE	TRUE	FALSE	FALSE	FALSE	FALSE	FALSE	FALSE	FALSE
chr04	367690	367704	+	15	XUT0153_367690_367704_15	XUT0153	5	TRUE	TRUE	FALSE	FALSE	FALSE	FALSE	FALSE	FALSE	FALSE
chr04	367867	367962	+	96	XUT0153_367867_367962_96	XUT0153	8	TRUE	TRUE	FALSE	FALSE	FALSE	FALSE	FALSE	FALSE	FALSE
chr04	368068	368145	+	78	XUT0153_368068_368145_78	XUT0153	12	TRUE	TRUE	FALSE	FALSE	FALSE	FALSE	FALSE	FALSE	FALSE
chr04	367643	367696	+	54	XUT0153_367643_367696_54	XUT0153	3	TRUE	TRUE	FALSE	FALSE	FALSE	FALSE	FALSE	FALSE	FALSE
chr04	367808	367867	+	60	XUT0153_367808_367867_60	XUT0153	6	TRUE	TRUE	FALSE	FALSE	FALSE	FALSE	FALSE	FALSE	FALSE
chr04	368075	368233	+	159	XUT0153_368075_368233_159	XUT0153	13	TRUE	TRUE	FALSE	FALSE	FALSE	FALSE	FALSE	FALSE	FALSE
chr04	368336	368368	+	33	XUT0153_368336_368368_33	XUT0153	15	TRUE	TRUE	FALSE	FALSE	FALSE	FALSE	FALSE	FALSE	FALSE
chr04	367428	367451	+	24	XUT0153_367428_367451_24	XUT0153	1	TRUE	TRUE	FALSE	FALSE	FALSE	FALSE	FALSE	FALSE	FALSE
chr04	367680	367730	+	51	XUT0153_367680_367730_51	XUT0153	4	TRUE	TRUE	FALSE	FALSE	FALSE	FALSE	FALSE	FALSE	FALSE
chr04	367842	367913	+	72	XUT0153_367842_367913_72	XUT0153	7	TRUE	TRUE	FALSE	FALSE	FALSE	FALSE	FALSE	FALSE	FALSE
chr04	367938	367967	+	30	XUT0153_367938_367967_30	XUT0153	9	TRUE	TRUE	FALSE	FALSE	FALSE	FALSE	FALSE	FALSE	FALSE
chr04	367974	368000	+	27	XUT0153_367974_368000_27	XUT0153	10	TRUE	TRUE	FALSE	FALSE	FALSE	FALSE	FALSE	FALSE	FALSE
chr04	368046	368126	+	81	XUT0153_368046_368126_81	XUT0153	11	TRUE	TRUE	FALSE	FALSE	FALSE	FALSE	FALSE	FALSE	FALSE
chr04	368187	368210	+	24	XUT0153_368187_368210_24	XUT0153	14	TRUE	TRUE	FALSE	FALSE	FALSE	FALSE	FALSE	FALSE	FALSE
chr04	368699	368797	+	99	XUT0154_368699_368797_99	XUT0154	2	TRUE	TRUE	FALSE	FALSE	FALSE	FALSE	FALSE	FALSE	FALSE
chr04	368610	368663	+	54	XUT0154_368610_368663_54	XUT0154	1	TRUE	TRUE	FALSE	FALSE	FALSE	FALSE	FALSE	FALSE	FALSE
chr04	368797	368916	+	120	XUT0154_368797_368916_120	XUT0154	3	TRUE	TRUE	FALSE	FALSE	FALSE	FALSE	FALSE	FALSE	FALSE
chr04	371828	371887	-	60	XUT1046_371828_371887_60	XUT1046	1	TRUE	TRUE	FALSE	FALSE	FALSE	FALSE	FALSE	FALSE	FALSE
chr04	371794	371811	-	18	XUT1046_371794_371811_18	XUT1046	2	TRUE	TRUE	FALSE	FALSE	FALSE	FALSE	FALSE	FALSE	FALSE
chr04	371701	371745	-	45	XUT1046_371701_371745_45	XUT1046	4	TRUE	TRUE	FALSE	FALSE	FALSE	FALSE	FALSE	FALSE	FALSE
chr04	371374	371634	-	261	XUT1046_371374_371634_261	XUT1046	5	TRUE	TRUE	FALSE	FALSE	FALSE	FALSE	FALSE	FALSE	FALSE
chr04	371284	371316	-	33	XUT1046_371284_371316_33	XUT1046	8	TRUE	TRUE	FALSE	FALSE	FALSE	FALSE	FALSE	FALSE	FALSE
chr04	371745	371780	-	36	XUT1046_371745_371780_36	XUT1046	3	TRUE	TRUE	FALSE	FALSE	FALSE	FALSE	FALSE	FALSE	FALSE
chr04	371541	371576	-	36	XUT1046_371541_371576_36	XUT1046	6	TRUE	TRUE	FALSE	FALSE	FALSE	FALSE	FALSE	FALSE	FALSE
chr04	371493	371507	-	15	XUT1046_371493_371507_15	XUT1046	7	TRUE	TRUE	FALSE	FALSE	FALSE	FALSE	FALSE	FALSE	FALSE
chr04	371166	371201	-	36	XUT1046_371166_371201_36	XUT1046	9	TRUE	TRUE	FALSE	FALSE	FALSE	FALSE	FALSE	FALSE	FALSE
chr04	371019	371048	-	30	XUT1046_371019_371048_30	XUT1046	10	TRUE	TRUE	FALSE	FALSE	FALSE	FALSE	FALSE	FALSE	FALSE
chr04	383009	383071	+	63	XUT0155_383009_383071_63	XUT0155	1	FALSE	FALSE	FALSE	FALSE	FALSE	FALSE	FALSE	FALSE	FALSE
chr04	383162	383221	+	60	XUT0155_383162_383221_60	XUT0155	2	FALSE	FALSE	FALSE	FALSE	FALSE	FALSE	FALSE	FALSE	FALSE
chr04	386321	386371	+	51	XUT0156_386321_386371_51	XUT0156	2	TRUE	TRUE	FALSE	FALSE	FALSE	FALSE	FALSE	FALSE	FALSE
chr04	386438	386551	+	114	XUT0156_386438_386551_114	XUT0156	4	TRUE	TRUE	FALSE	FALSE	FALSE	FALSE	FALSE	FALSE	FALSE
chr04	386969	387058	+	90	XUT0156_386969_387058_90	XUT0156	7	TRUE	TRUE	FALSE	FALSE	FALSE	FALSE	FALSE	FALSE	FALSE
[truncated: 11,942 more rows]
